# Supplementary material
Source: PubMed Central journal article supplement (PMC8569887)
Supplement: NIHMS1752272-supplement-Supporting_Info.pdf [file NIHMS1752272-supplement-Supporting_Info.pdf]

## Supporting Information

### **Evaluation of Structure-Activity Relationship of Microtubule (MT)-Targeting 1,2,4-Triazolo[1,5-*a*]pyrimidines Identifies New Candidates for Neurodegenerative Tauopathies.**

Killian Oukoloff,<sup>a</sup> Goodwell Nzou,<sup>b</sup> Carmine Varricchio,<sup>c</sup> Bobby Lucero,<sup>d</sup> Thibault Alle,<sup>a</sup> Jane Kovalevich,<sup>b</sup> Ludovica Monti,<sup>a</sup> Anne-Sophie Cornec,<sup>c</sup> Yuemang Yao,<sup>b</sup> Michael J. James,<sup>b</sup> John Q. Trojanowski,<sup>b</sup> Virginia M.-Y. Lee,<sup>b</sup> Amos B. Smith III,<sup>c</sup> Andrea Brancale,<sup>c</sup> Kurt R. Brunden<sup>b,\*</sup> and Carlo Ballatore<sup>a,\*</sup>

<sup>a</sup>Skaggs School of Pharmacy and Pharmaceutical Sciences, University of California, San Diego, 9500 Gilman Drive, La Jolla, CA 92093; <sup>b</sup>Center for Neurodegenerative Disease Research, Perelman School of Medicine, University of Pennsylvania, 3600 Spruce St., Philadelphia, PA 19104; <sup>c</sup>Cardiff School of Pharmacy and Pharmaceutical Sciences, Cardiff, King Edward VII Avenue, Cardiff CF103NB, UK; <sup>d</sup>Department of Chemistry & Biochemistry, University of California San Diego, 9500 Gilman Drive, La Jolla, CA, 92093, USA; <sup>e</sup>Department of Chemistry, School of Arts and Sciences, University of Pennsylvania, 231 South 34<sup>th</sup> St., Philadelphia, PA 19104-6323.

#### **Table of contents**

S1–S2: **Table S-1** (HeLa/QBI293 cell cytotoxicity assay of selected compounds)

S3–S118: **NMR spectra of new triazolopyrimidines**

S119–128: **Analytical QC HPLC of representative compounds**

S129–S147: **X-Ray report for 68 and 112**

**Table S-1: HeLa/QBI293 cell cytotoxicity assay of selected compounds**

| Cpd#            | Structure                                                                           | HeLa IC <sub>50</sub> (nM) | QBI293 IC <sub>50</sub> (nM) |
|-----------------|-------------------------------------------------------------------------------------|----------------------------|------------------------------|
| Taxol           | -                                                                                   | 1.45 ± 0.083               | 1.40 ± 0.129                 |
| Vinblastine     | -                                                                                   | 3.11 ± 0.252               | 1.93 ± 0.286                 |
| 7               | 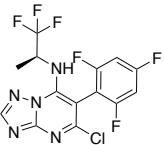   | 50.8 ± 0.051               | 102 ± 0.120                  |
| 6               |    | 10.1 ± 0.066               | 21.2 ± 0.101                 |
| 3               |   | 51.9 ± 0.081               | 84.0 ± 0.141                 |
| 46              |  | 80.7 ± 0.080               | 186 ± 0.142                  |
| 47              |  | 75.4 ± 0.077               | 236 ± 0.138                  |
| 5 (Cevipabulin) |  | 12.8 ± 0.117               | 28.0 ± 0.168                 |

## Experimental section

### *HeLa/QBI293 cells cytotoxicity assay*

The CellTiter-Glo<sup>®</sup> luminescent cell viability assay (G7572; Promega) was employed to measure the ability of test compounds to inhibit cancer cell proliferation. Compounds in 100% DMSO stocks were diluted in 50 μL medium in 96-well plates (Corning 3903) such that the final DMSO

concentration was 1%. Eight-point dose response assays were set up. HeLa or QBI293 cells were then diluted to  $1 \times 10^5$  cells/mL in medium and dispensed into the previously prepared 96-well plates at 50  $\mu$ L per well. After 48 h incubation at 37°C and 5% CO<sub>2</sub>, cells were lysed by the addition of 100  $\mu$ L/well of Cell-titer Glo<sup>®</sup>. Plates were read on the 2104 EnVision<sup>®</sup> multilabel plate reader (PerkinElmer). The activity of test compounds was normalized against controls from the same plate. ED<sub>50</sub> values, *i.e.*, the concentration of drug required to inhibit cell growth by 50%, were calculated using GraphPad Prism software, version 8.3.0 for macOS. Each assay was performed as three experimental replicates and means  $\pm$  SD values are shown.

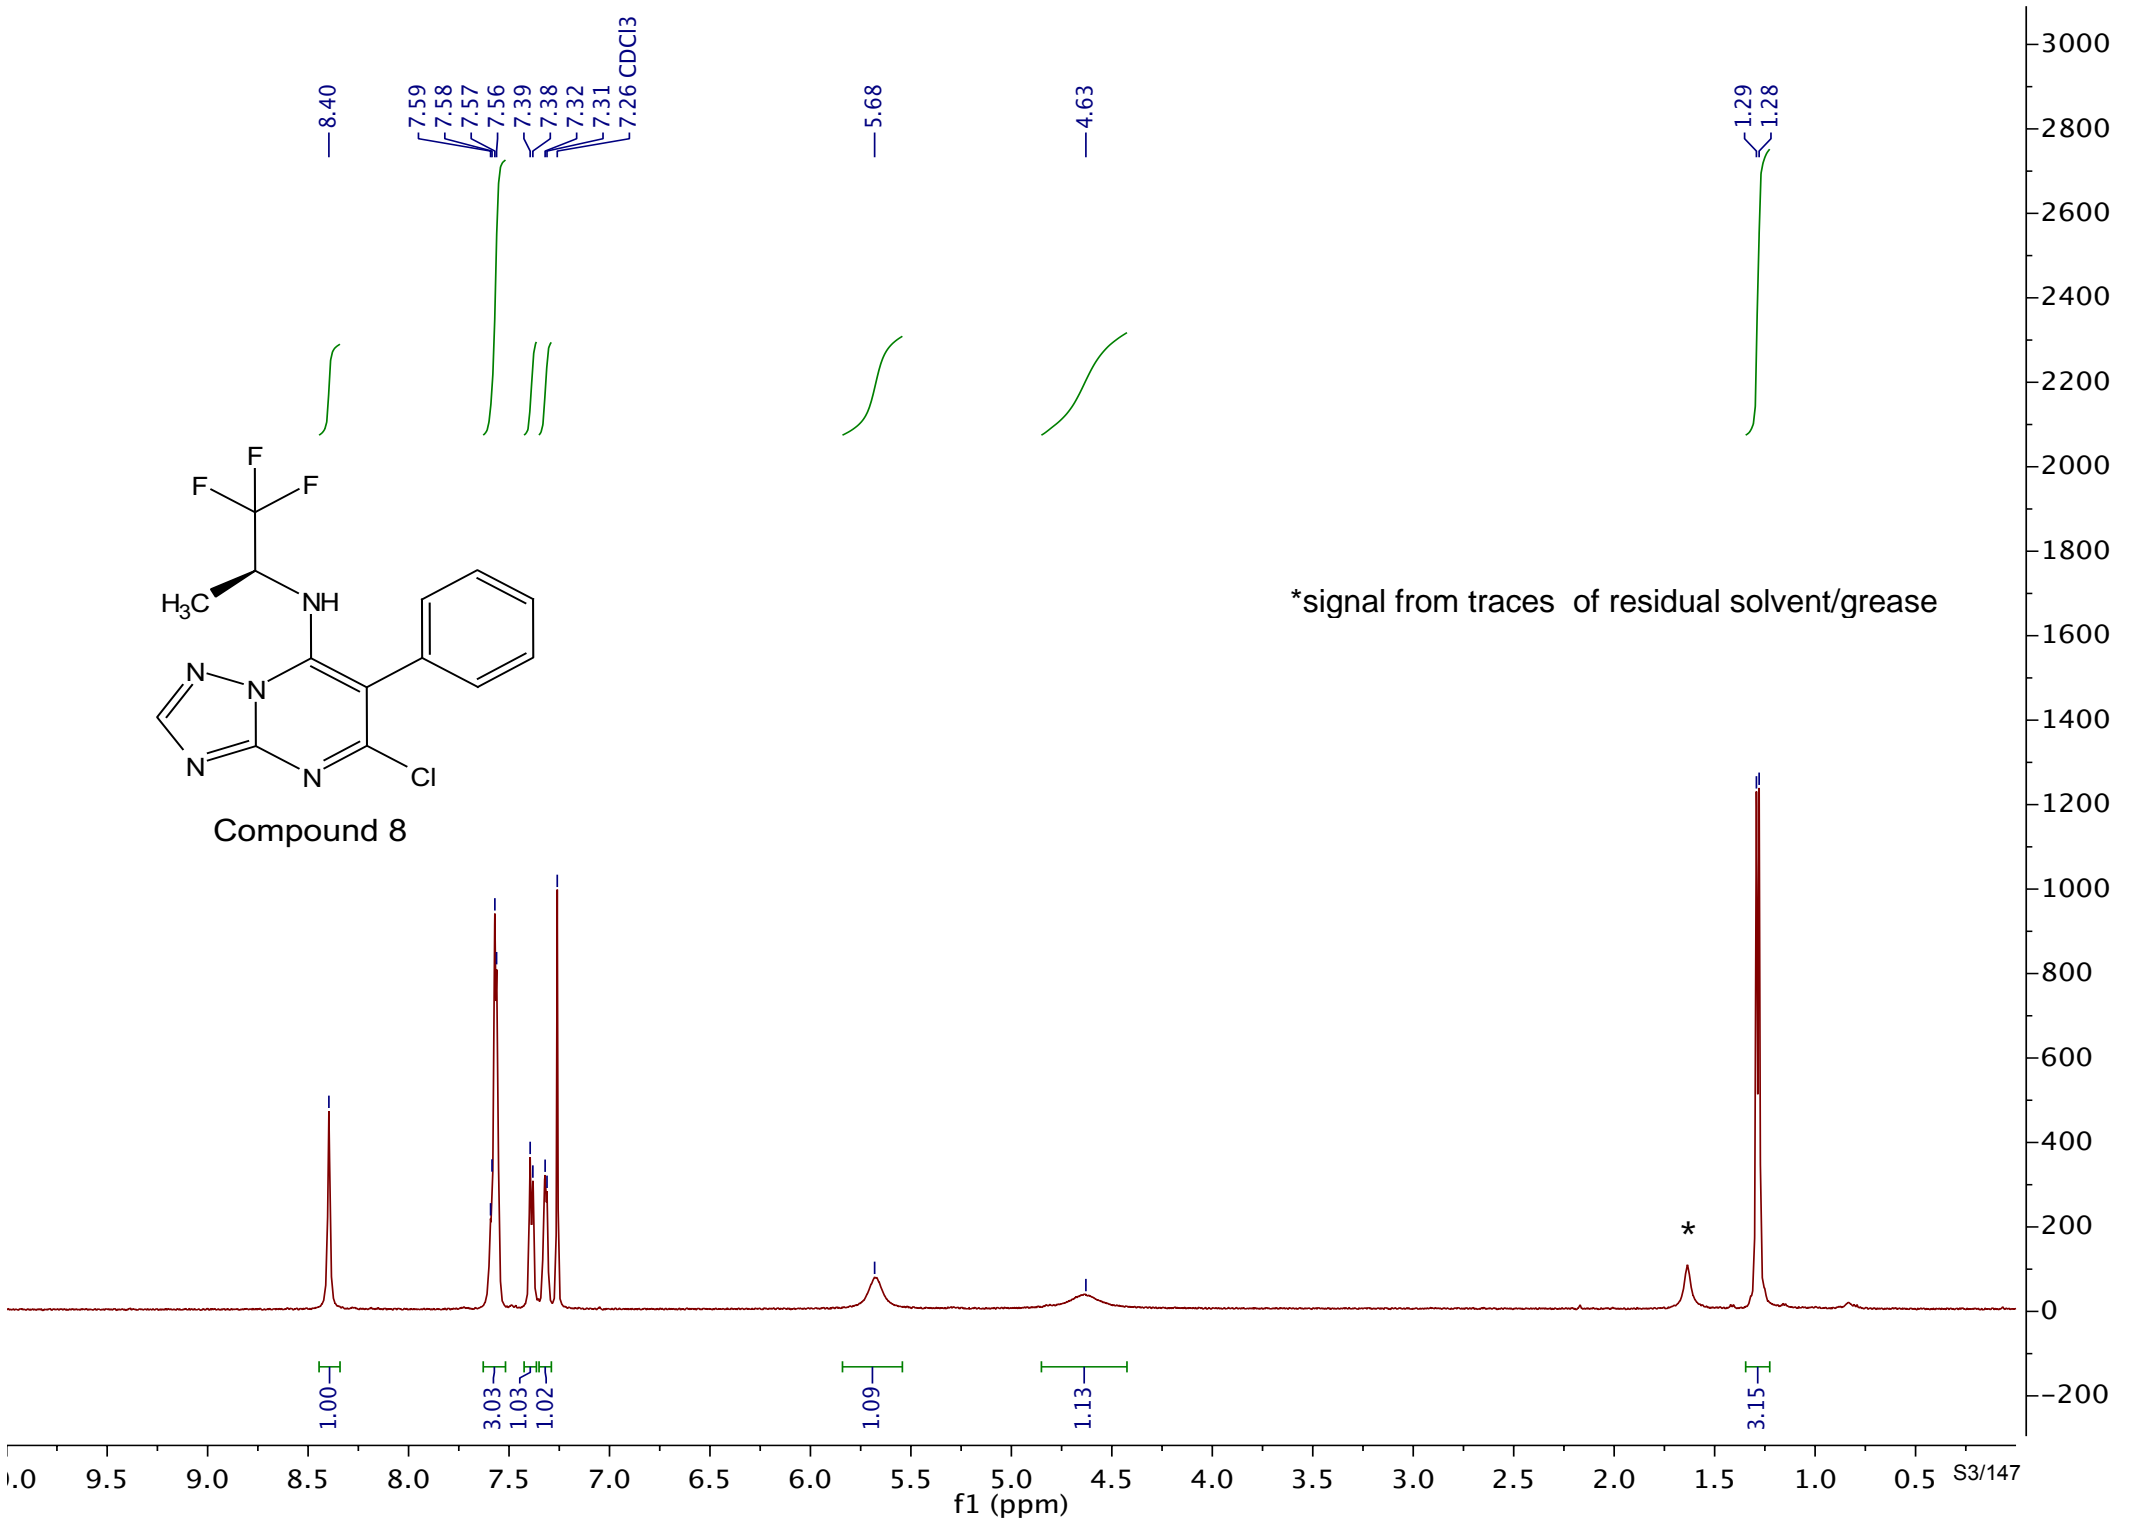

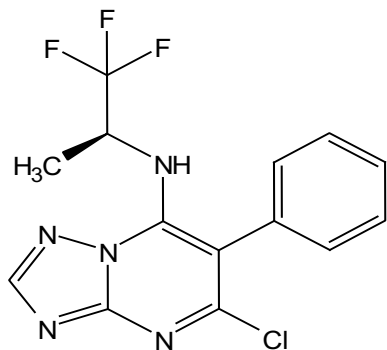

Compound 8

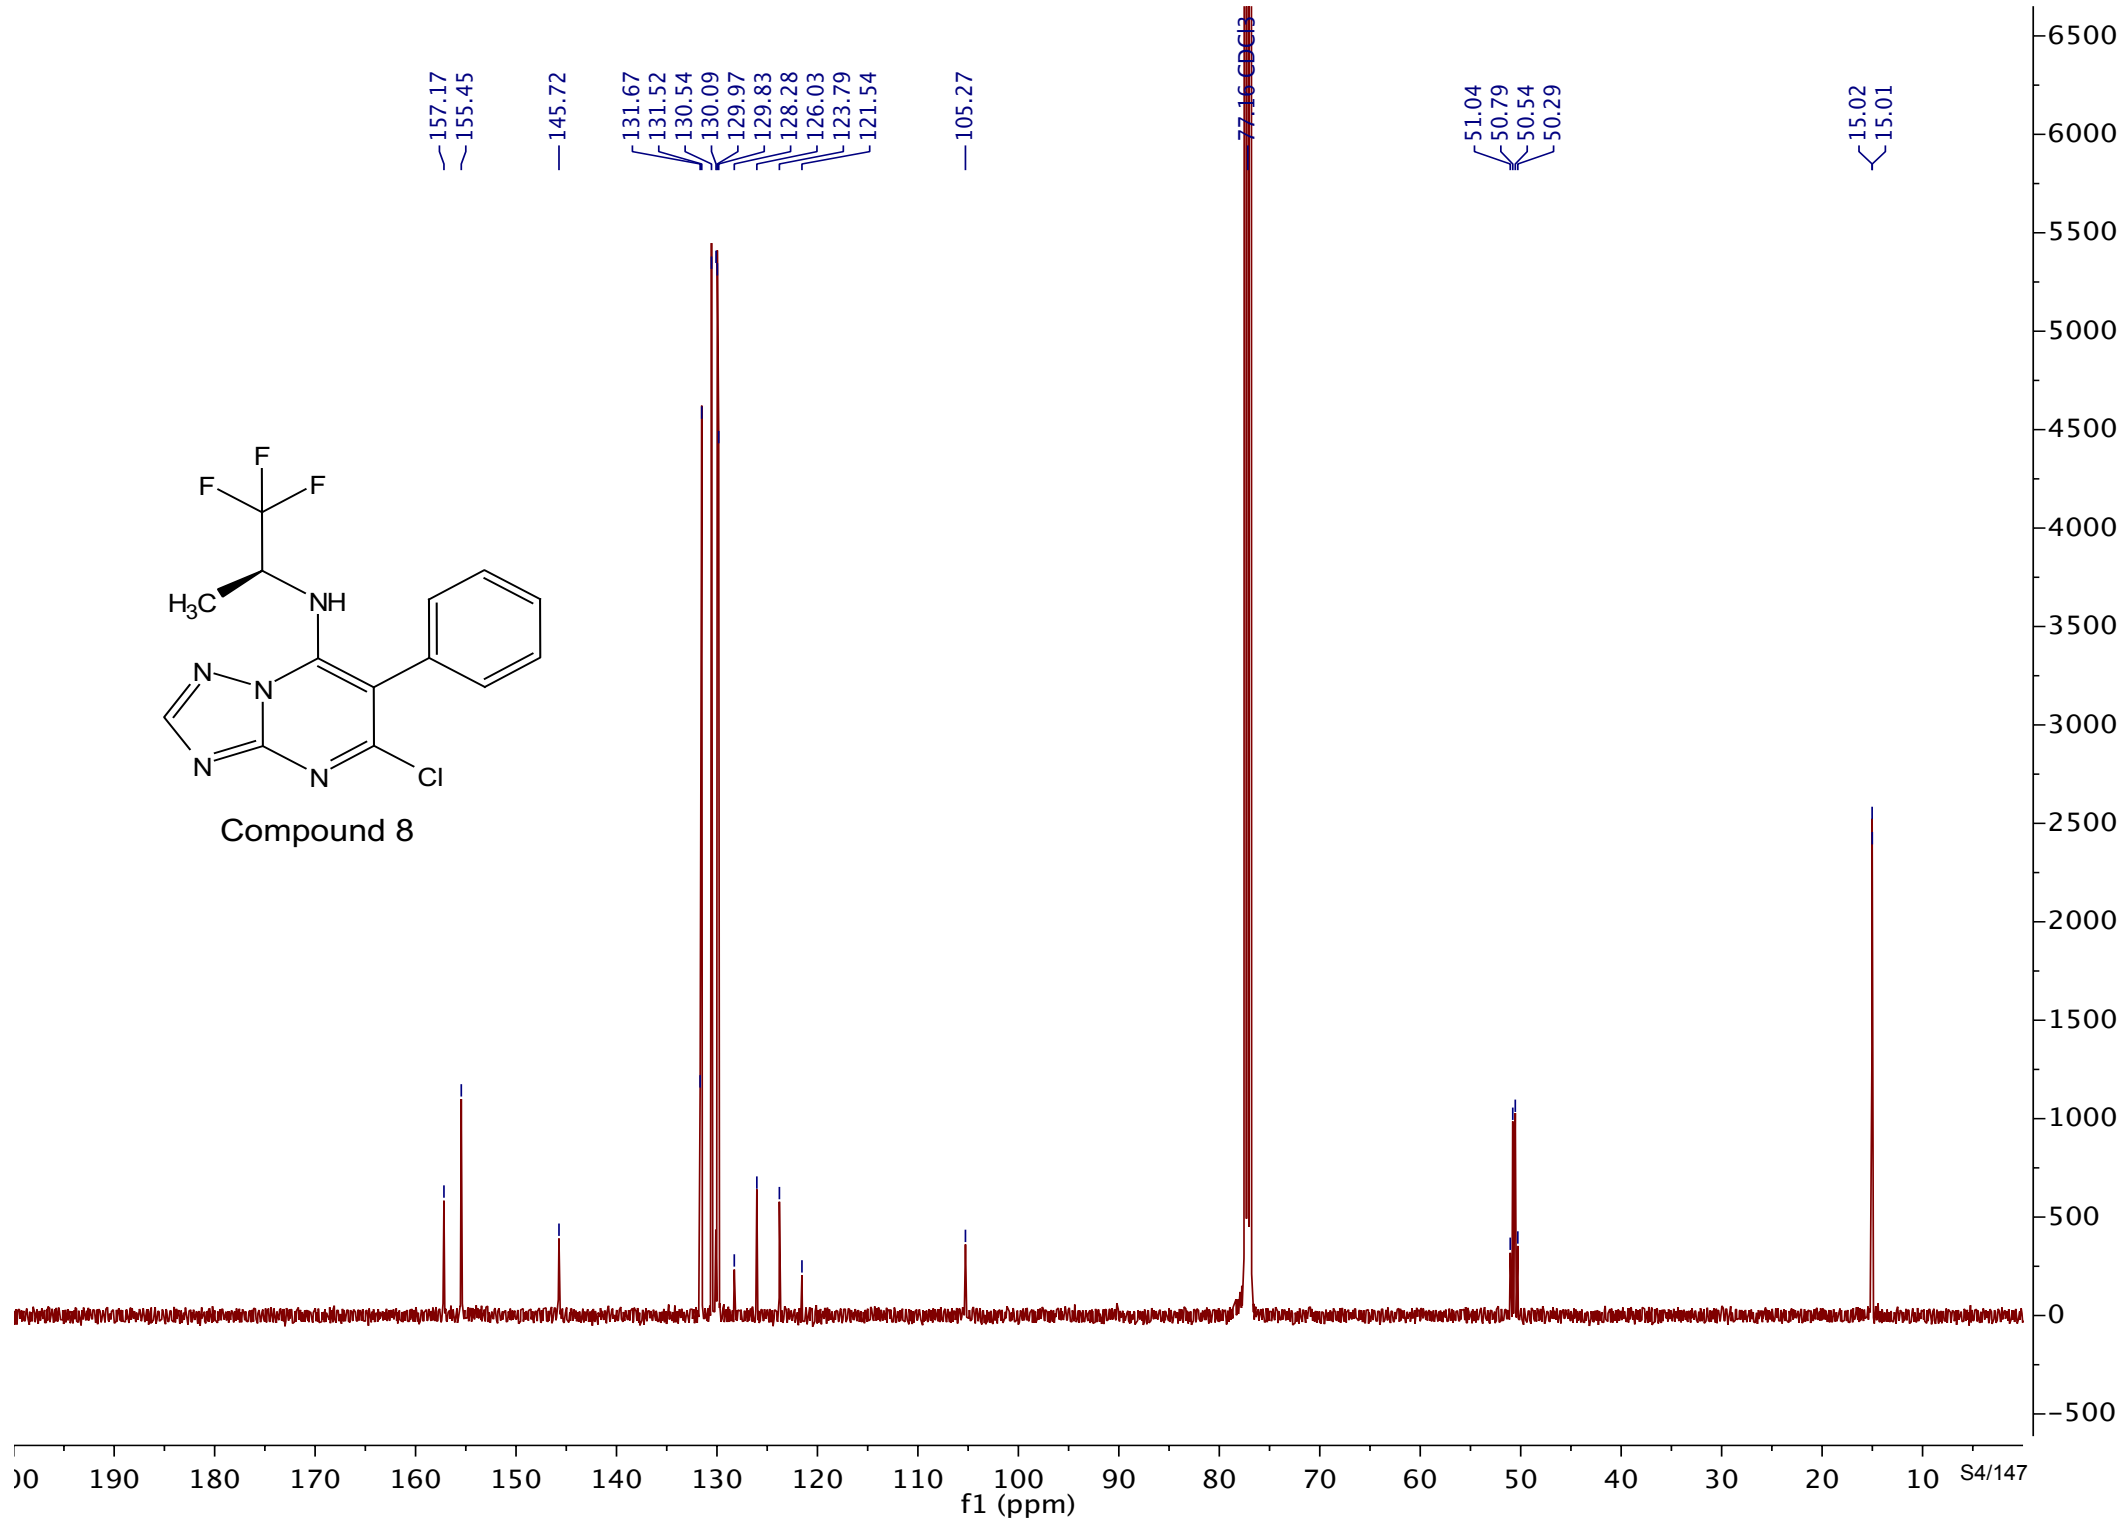

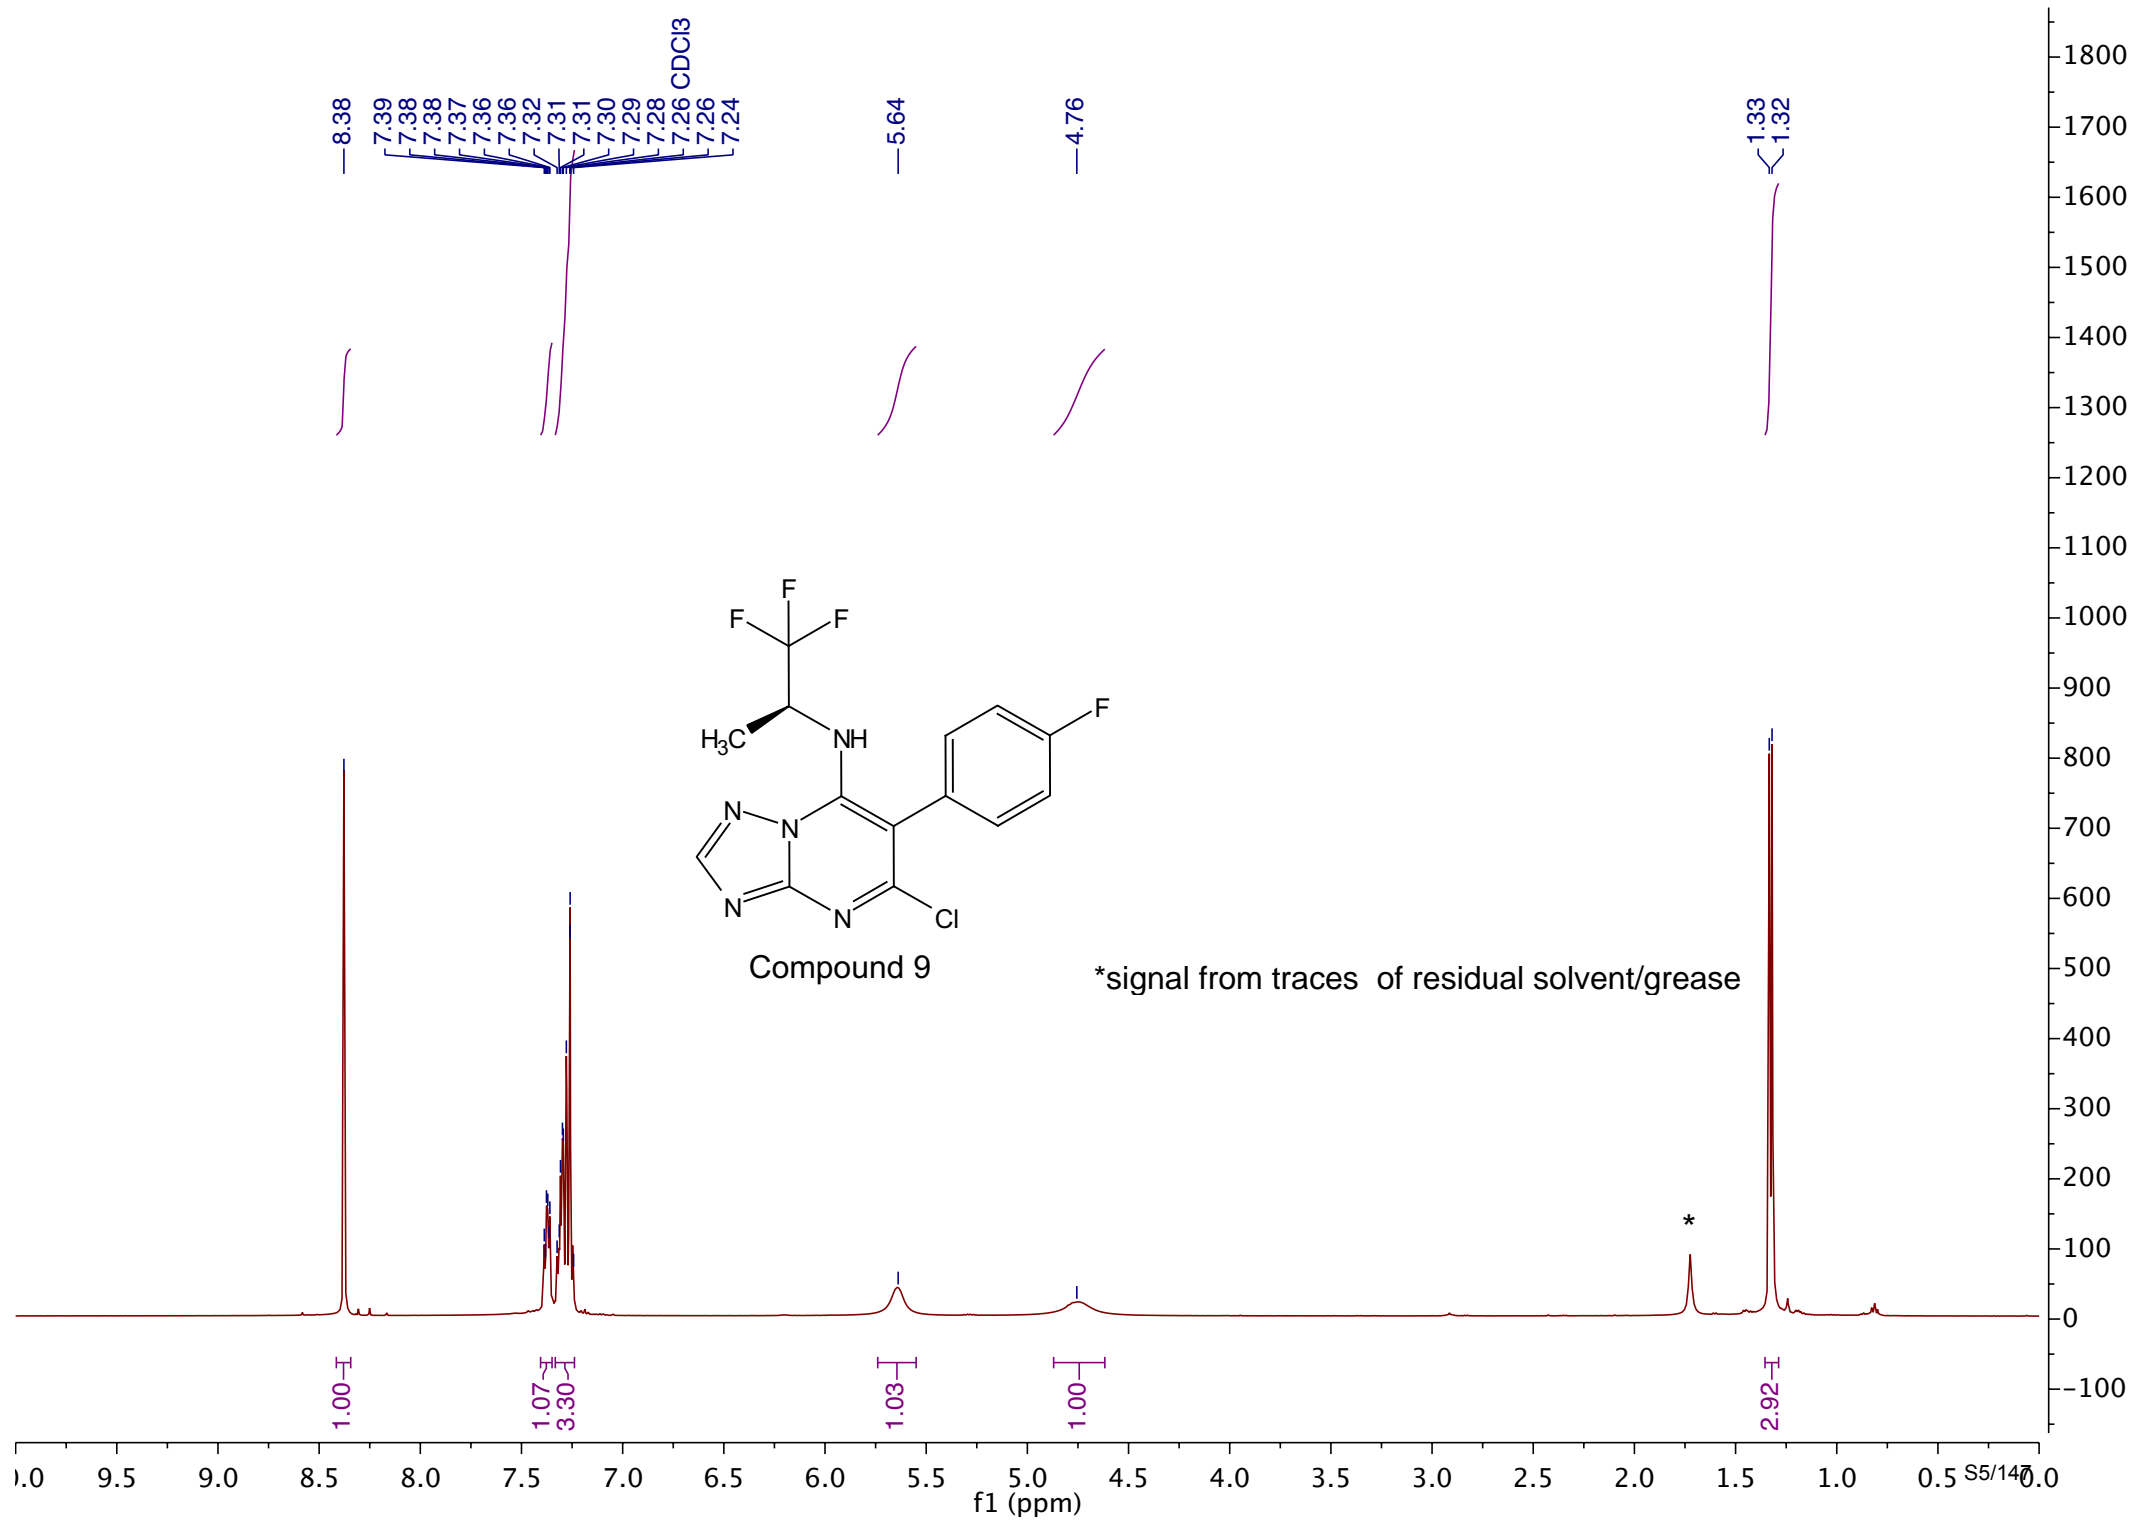

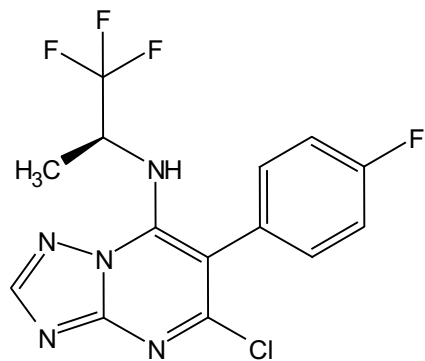

Compound 9

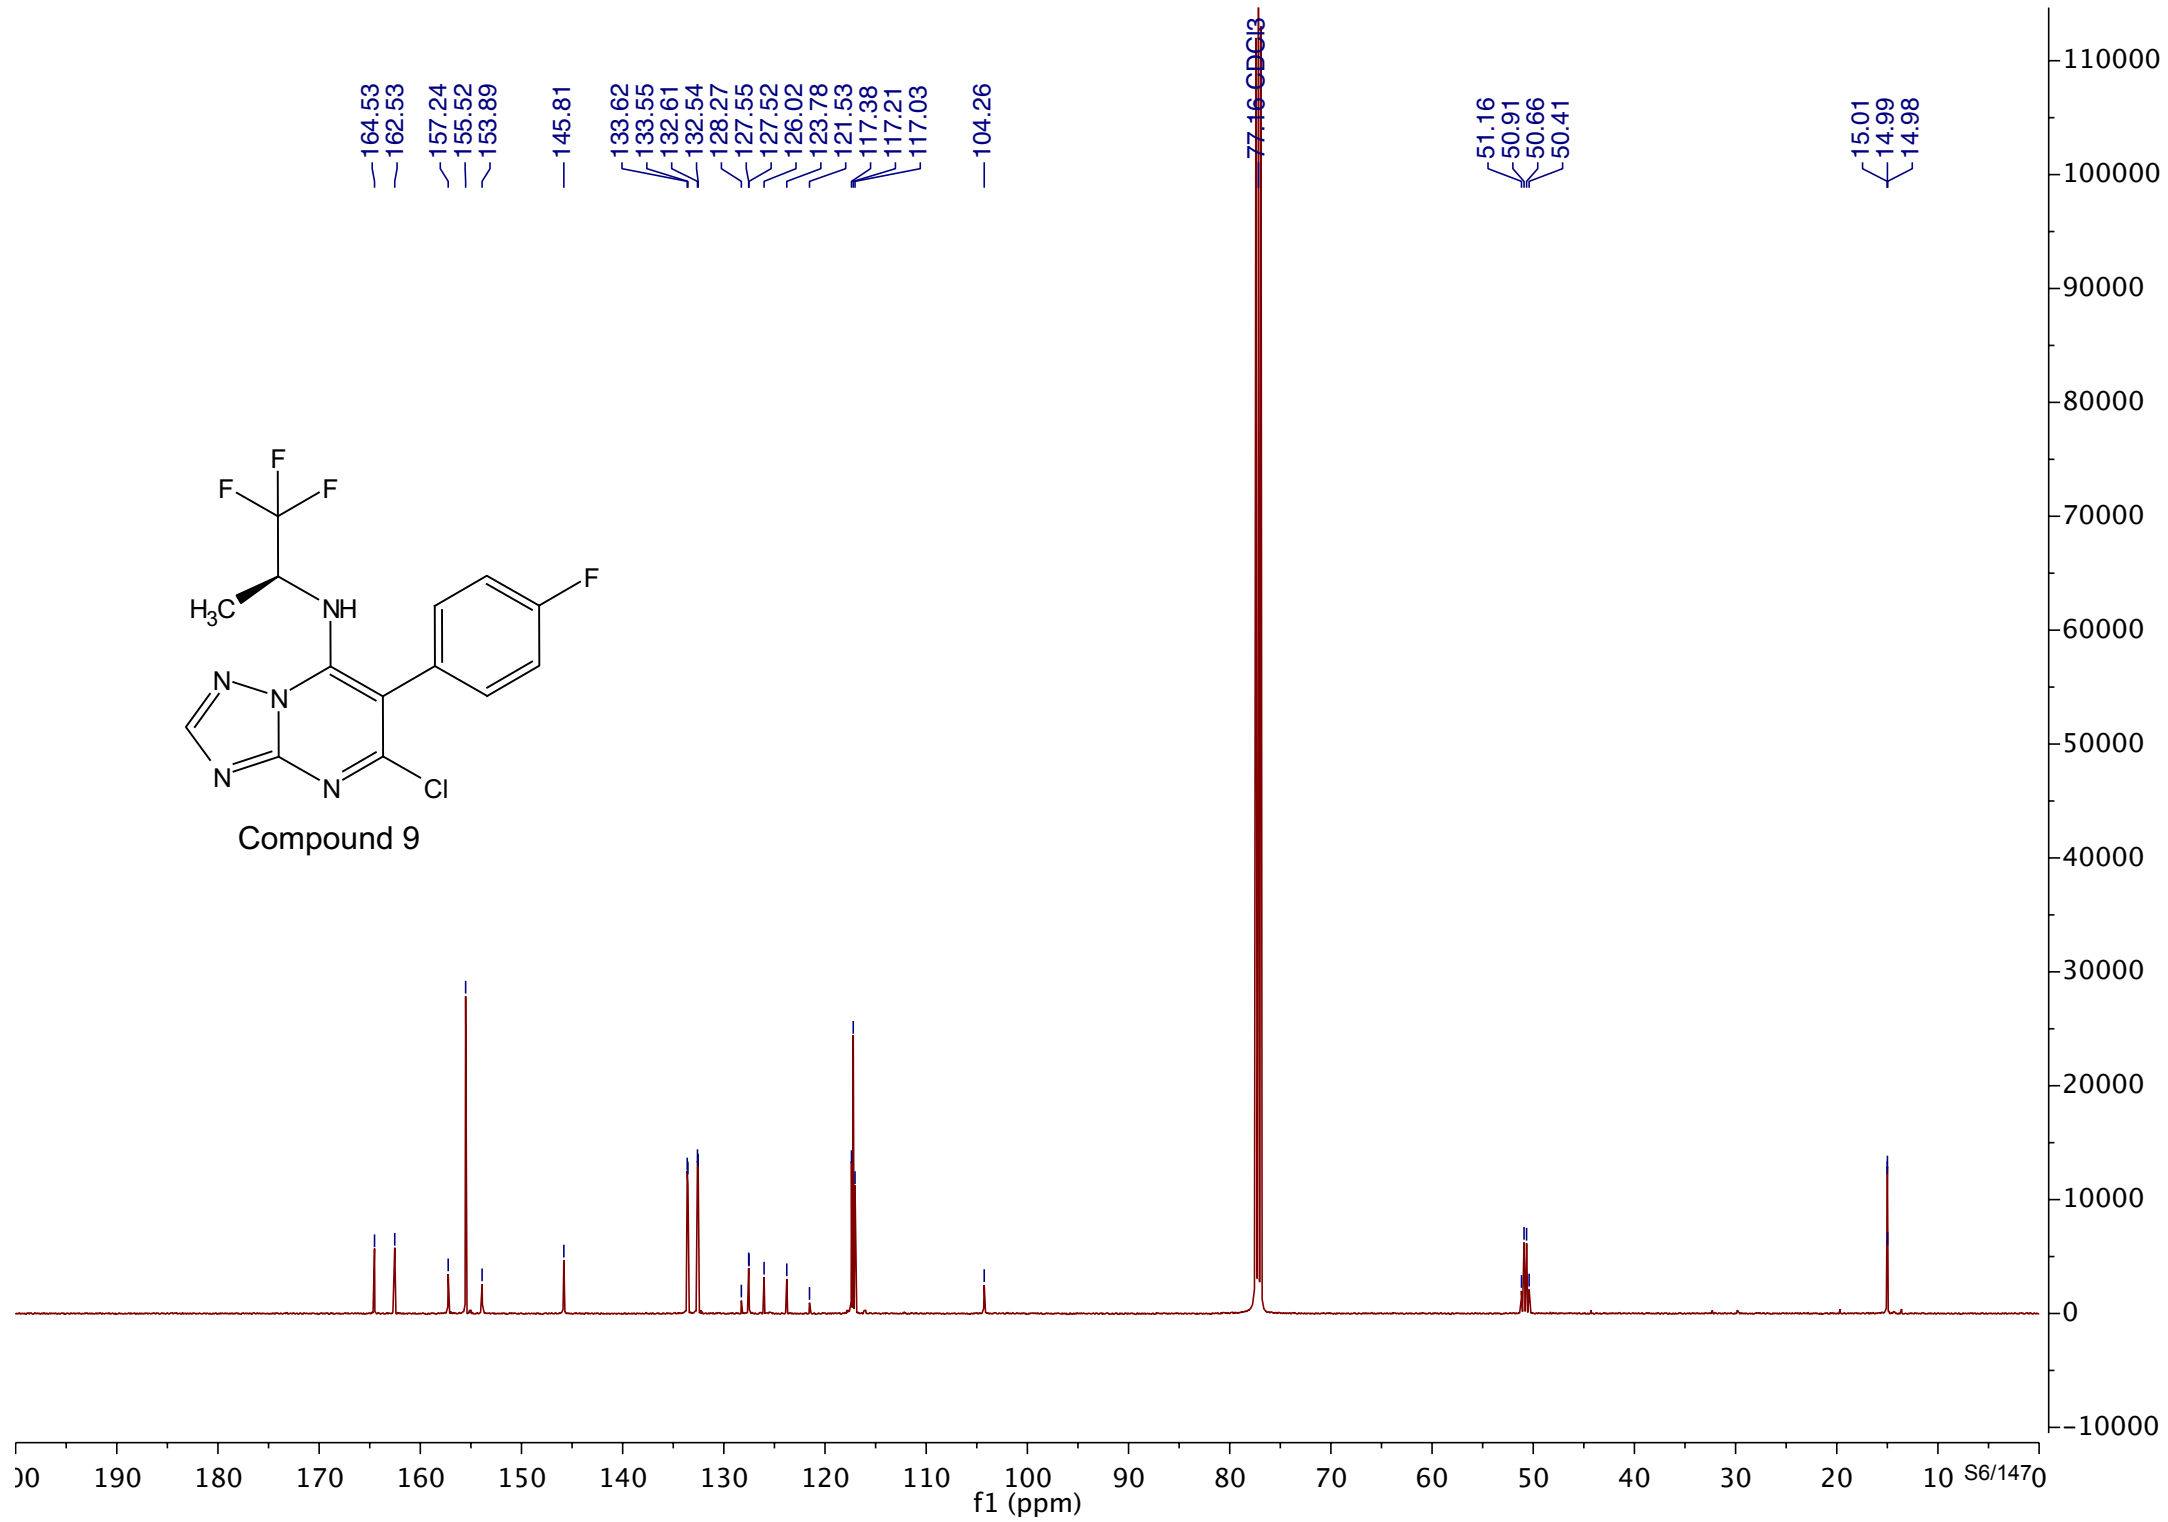

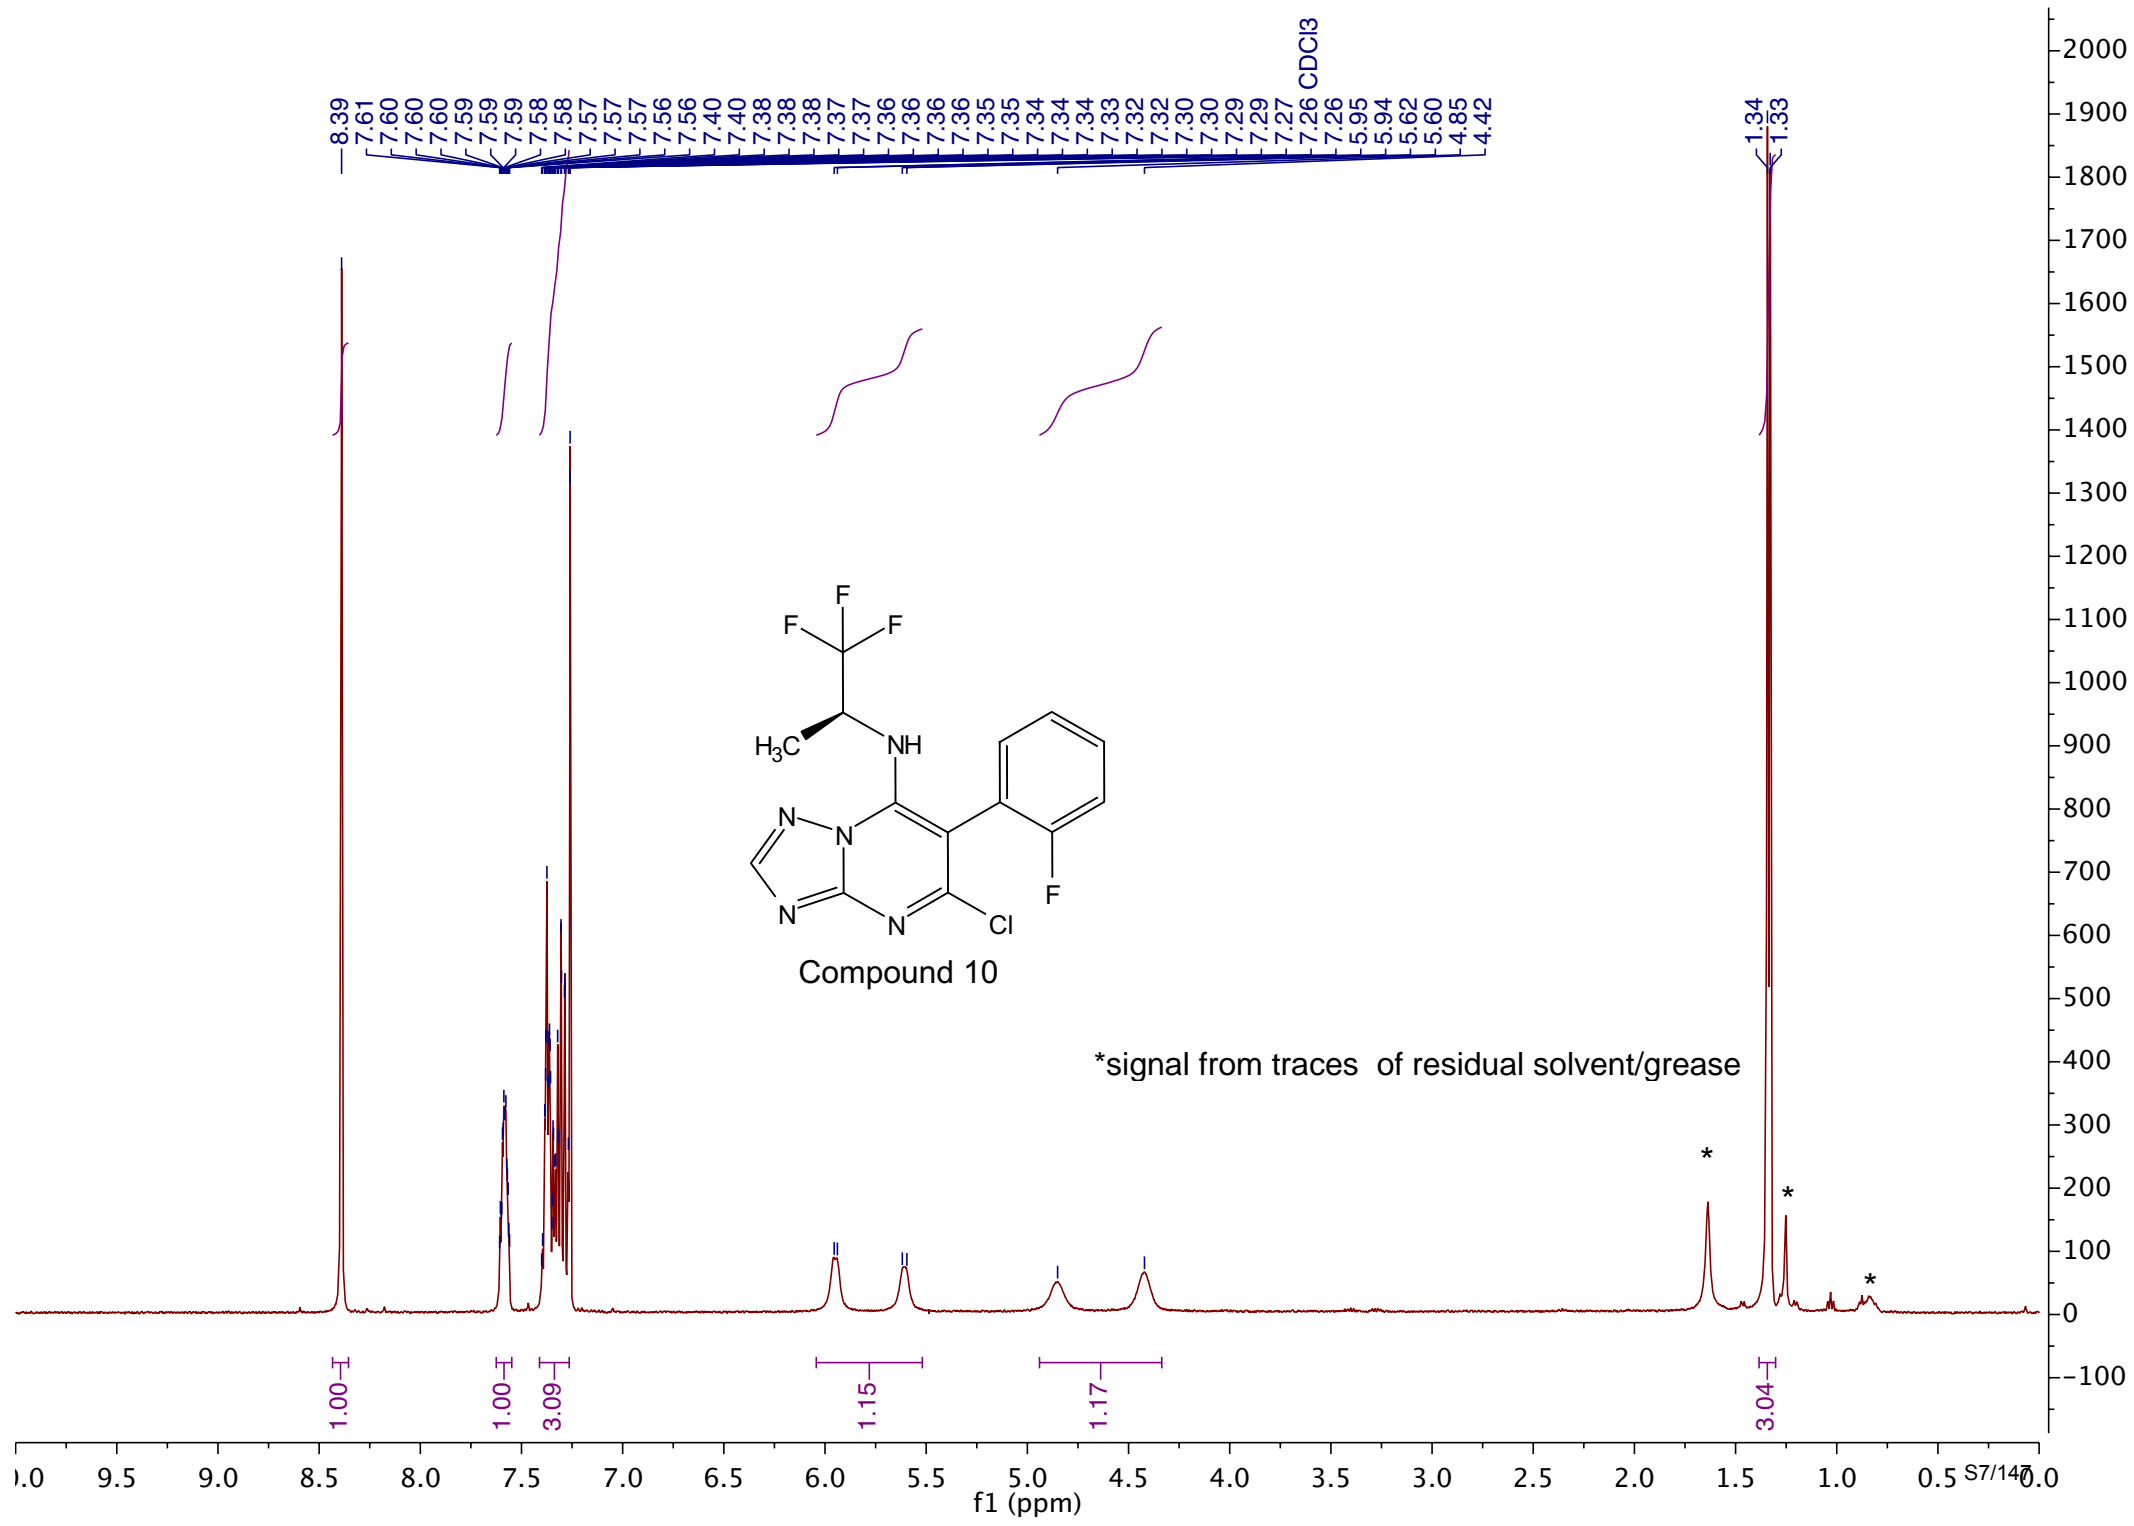



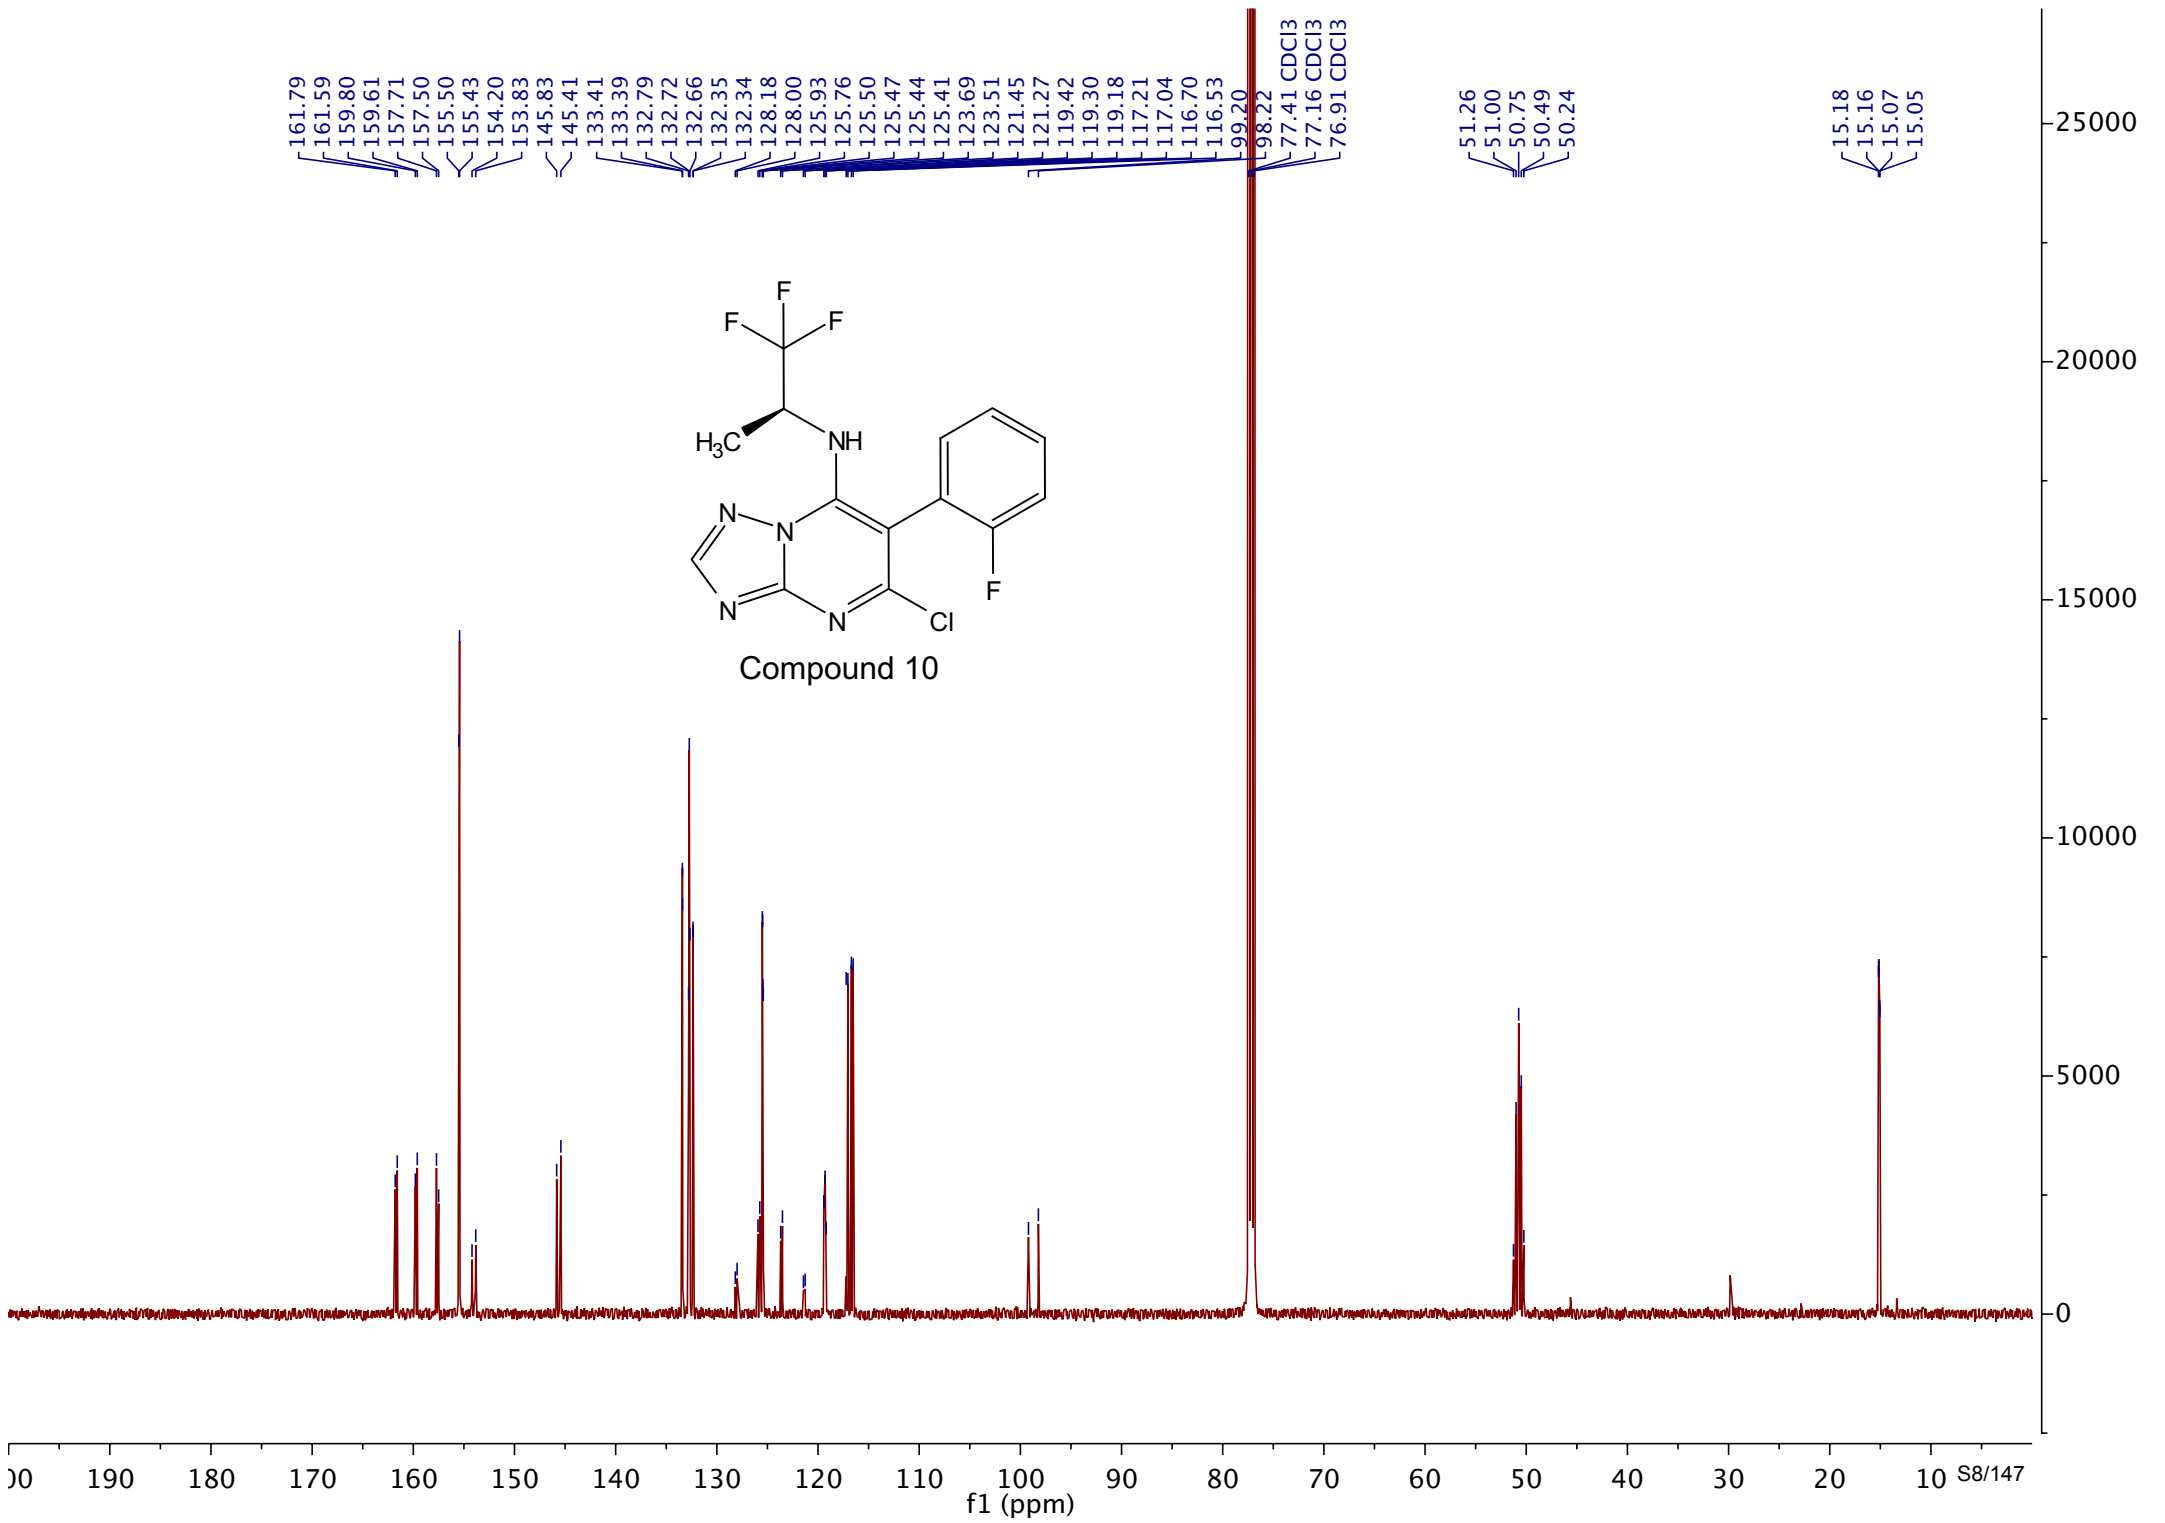

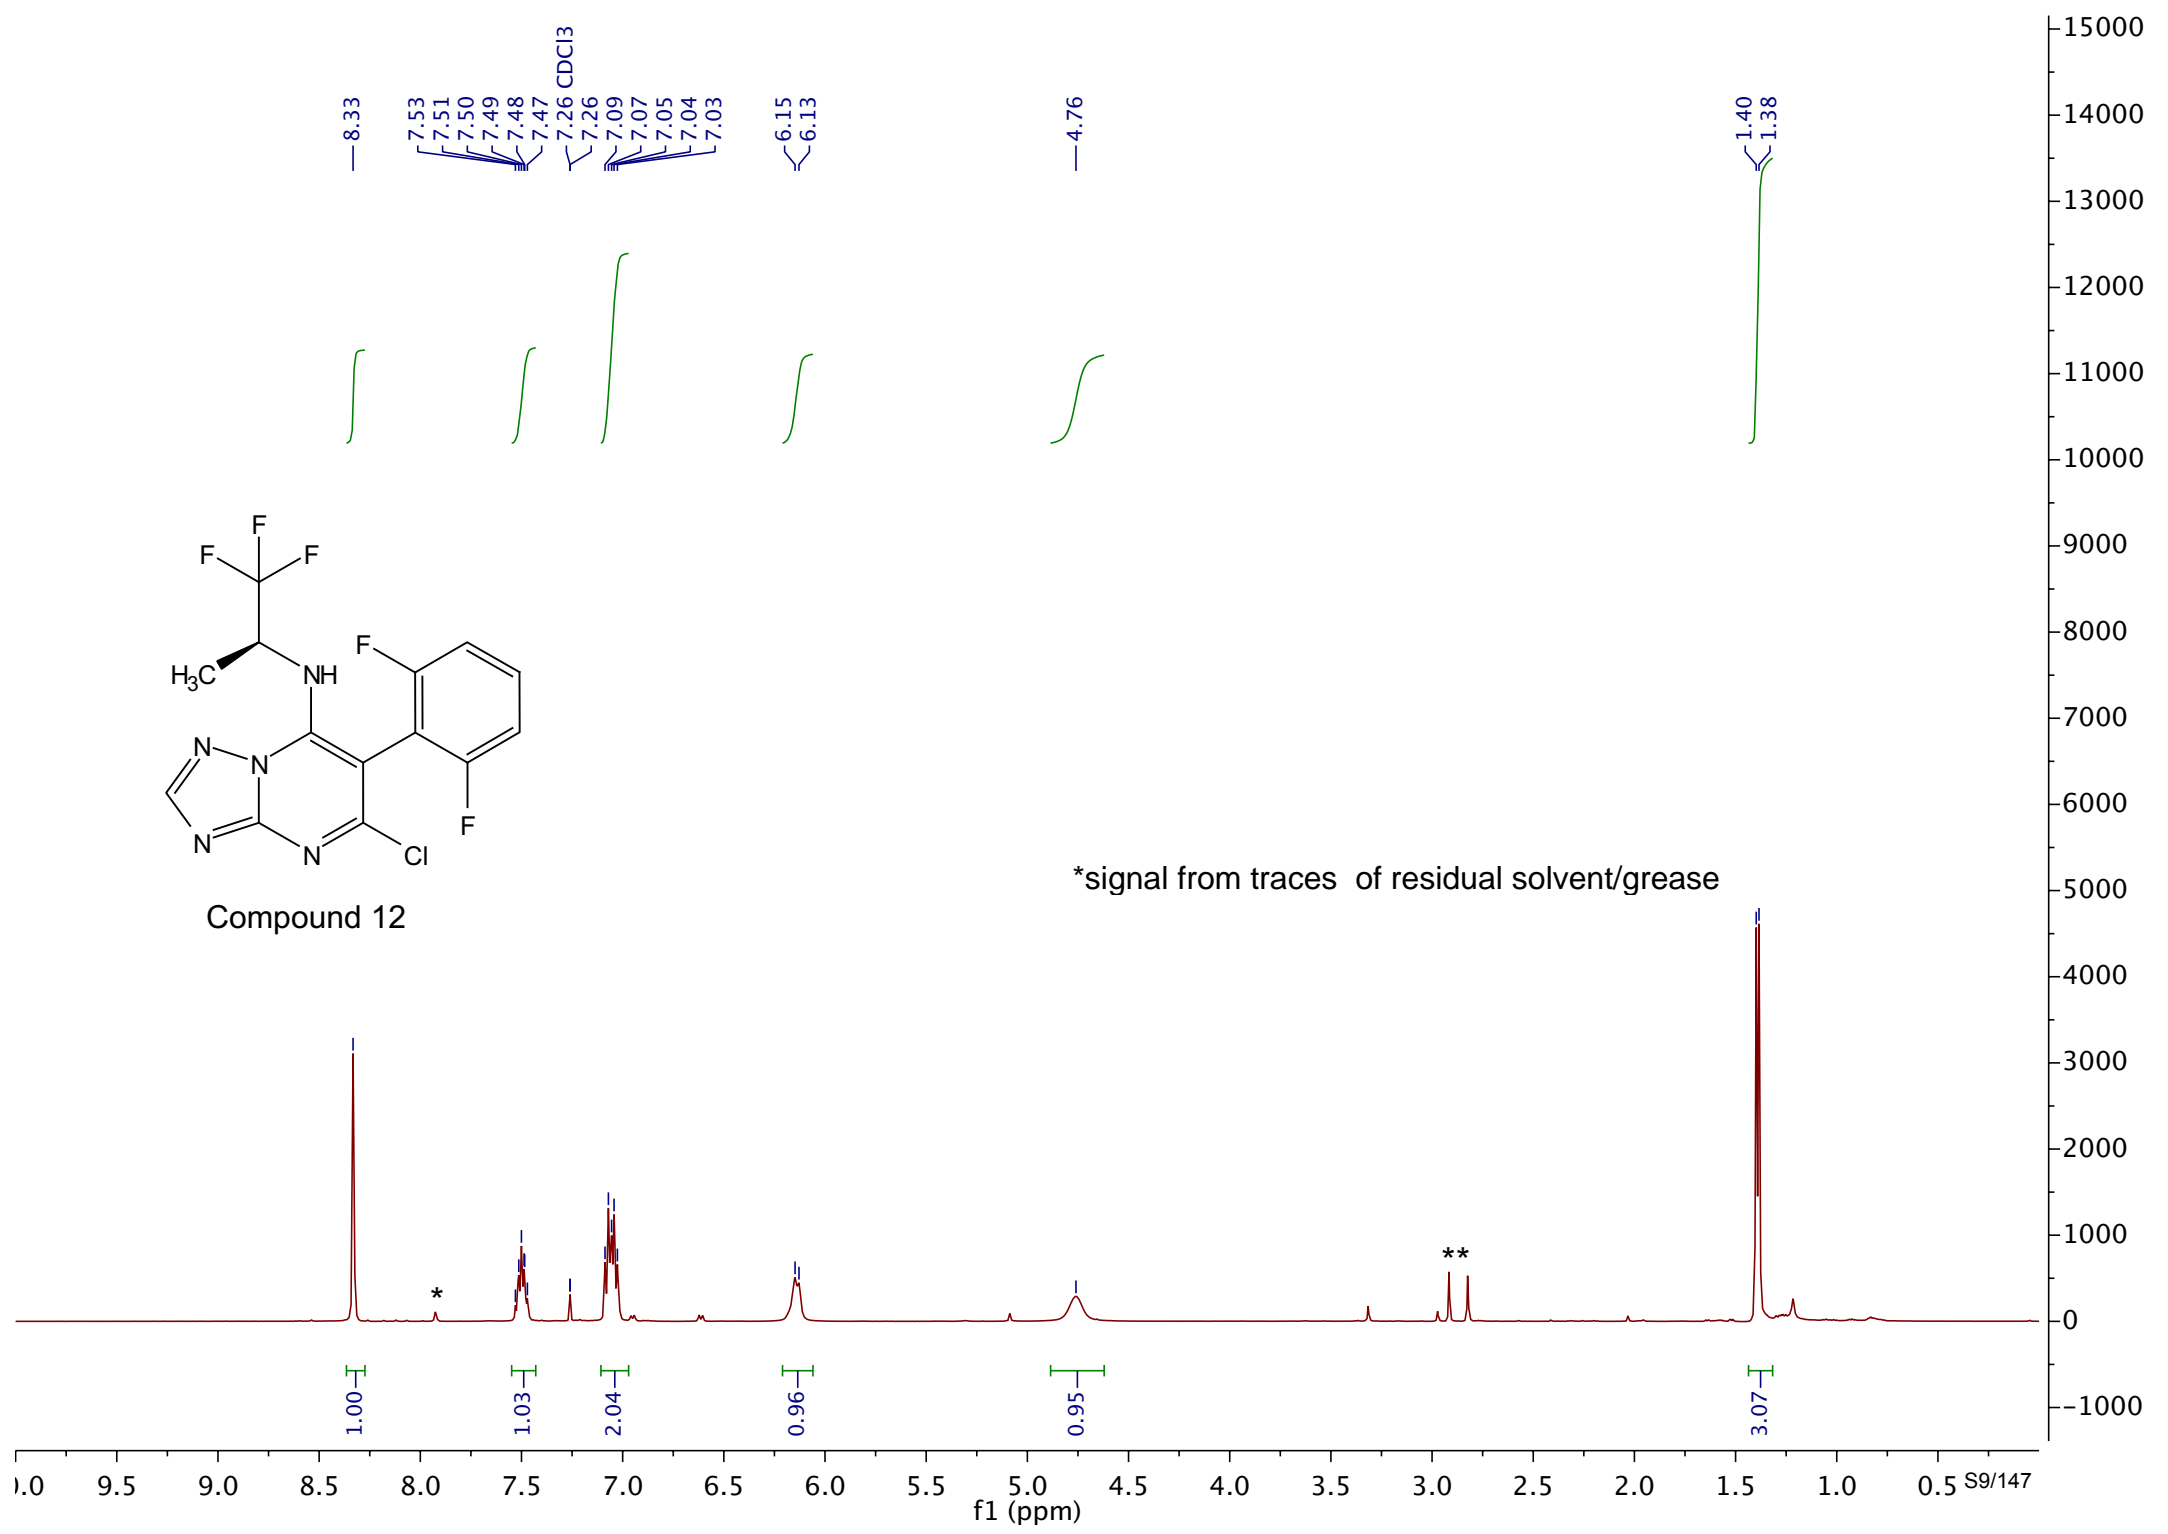

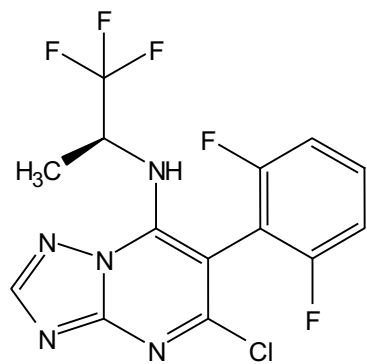

Compound 12

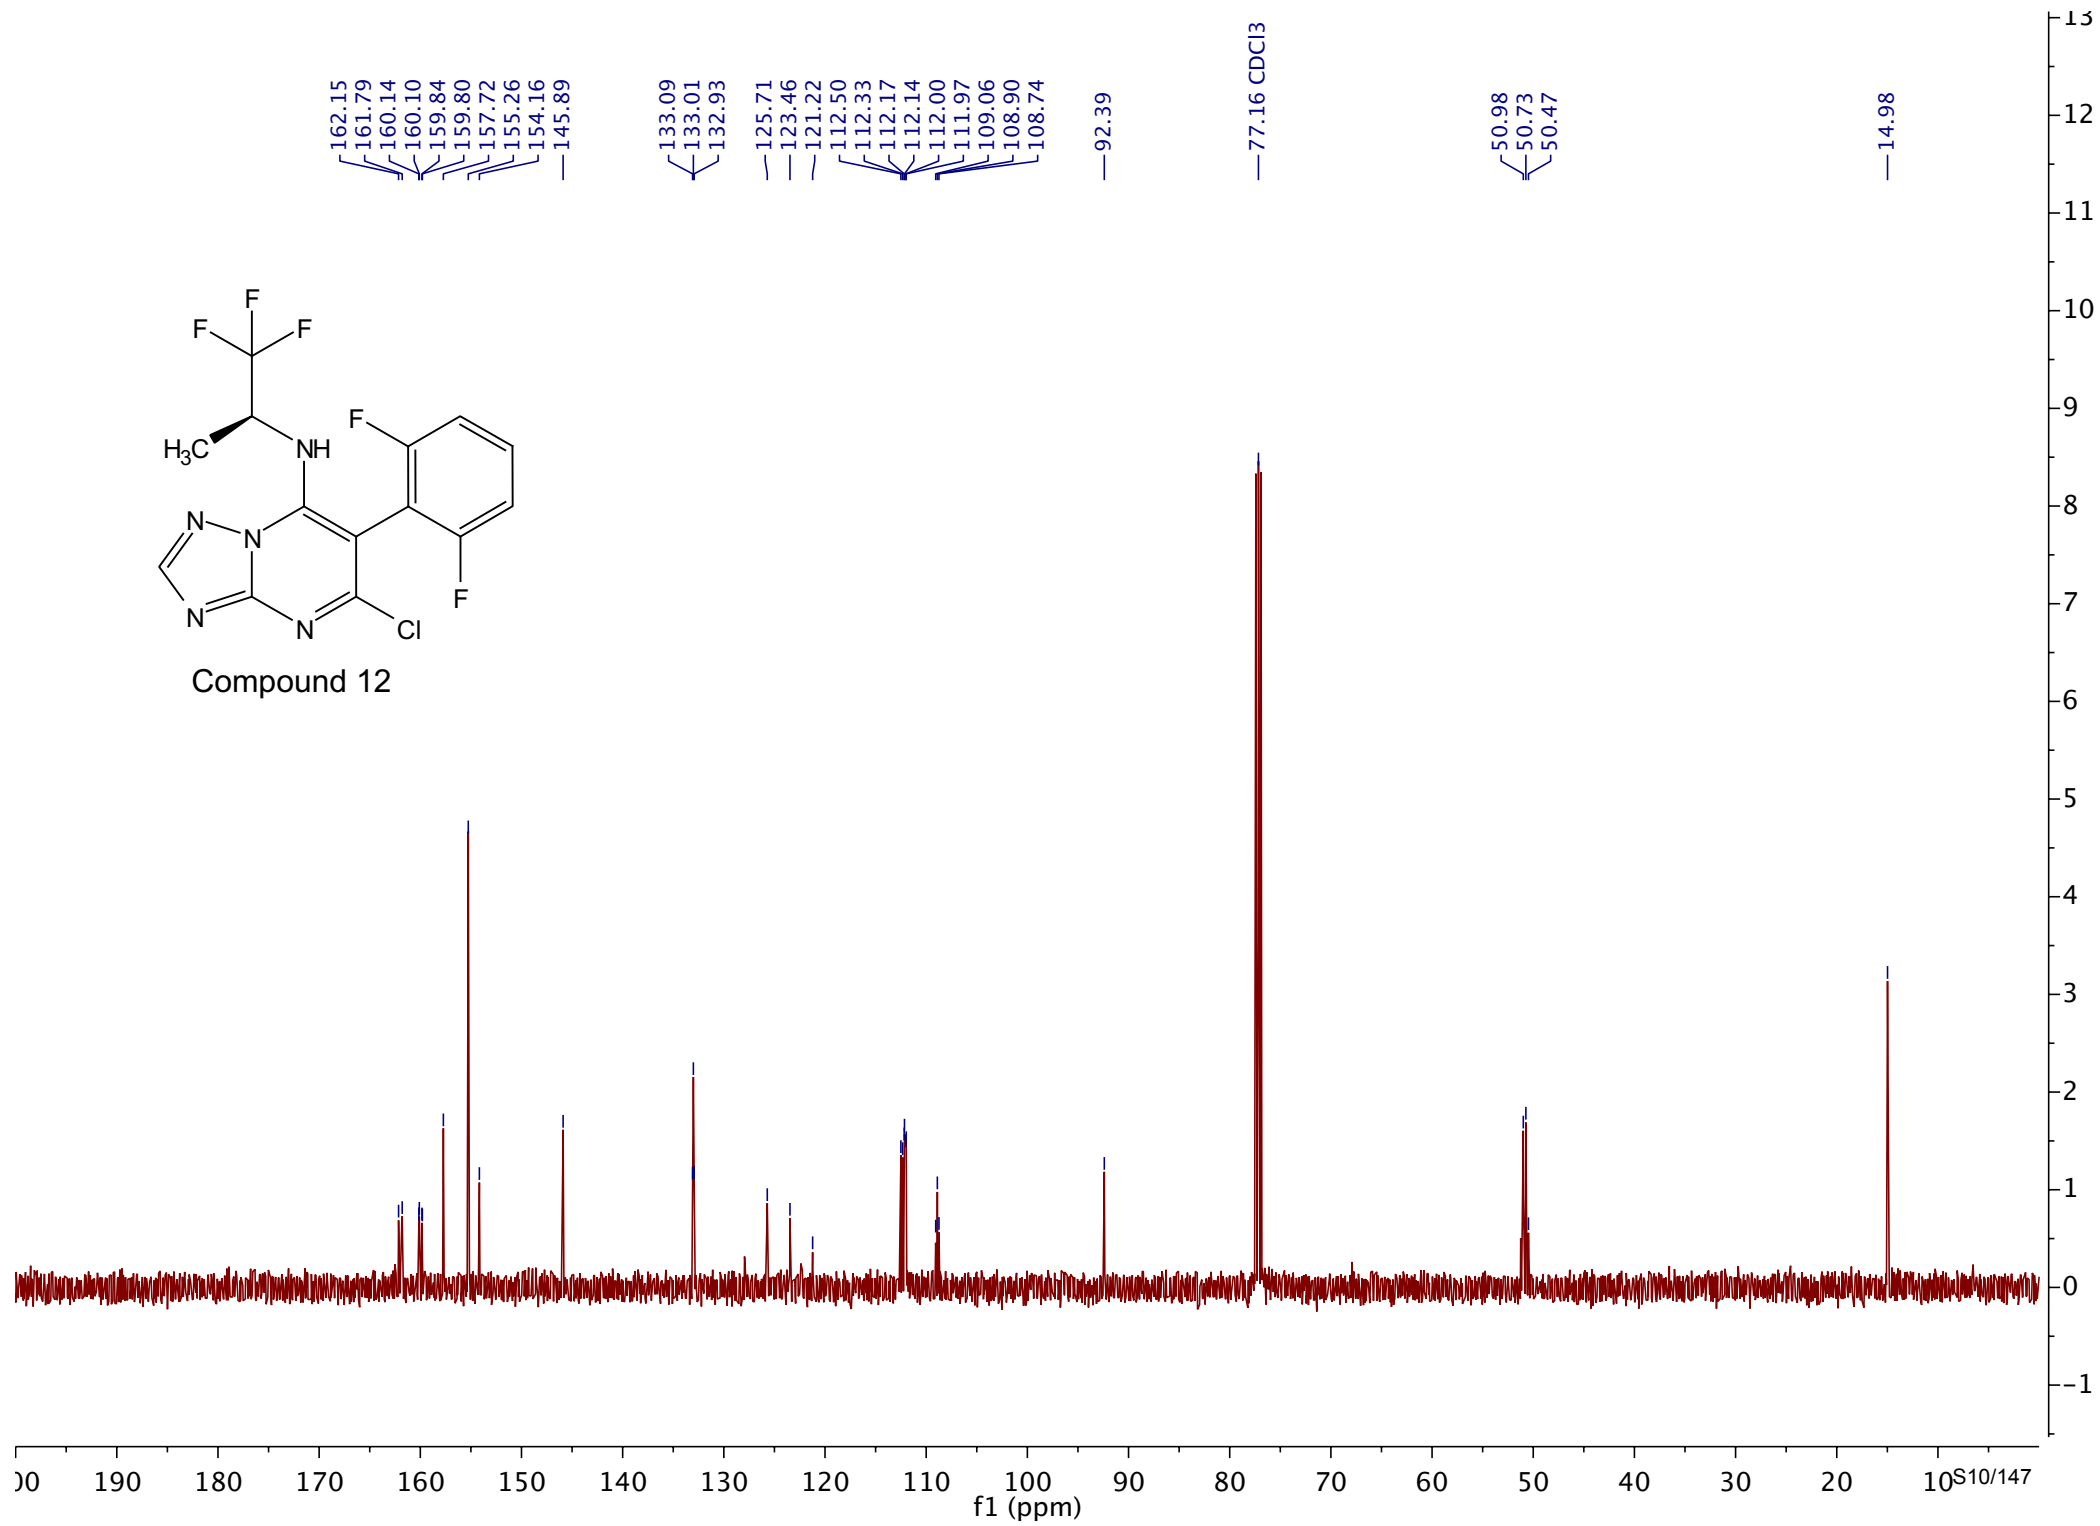

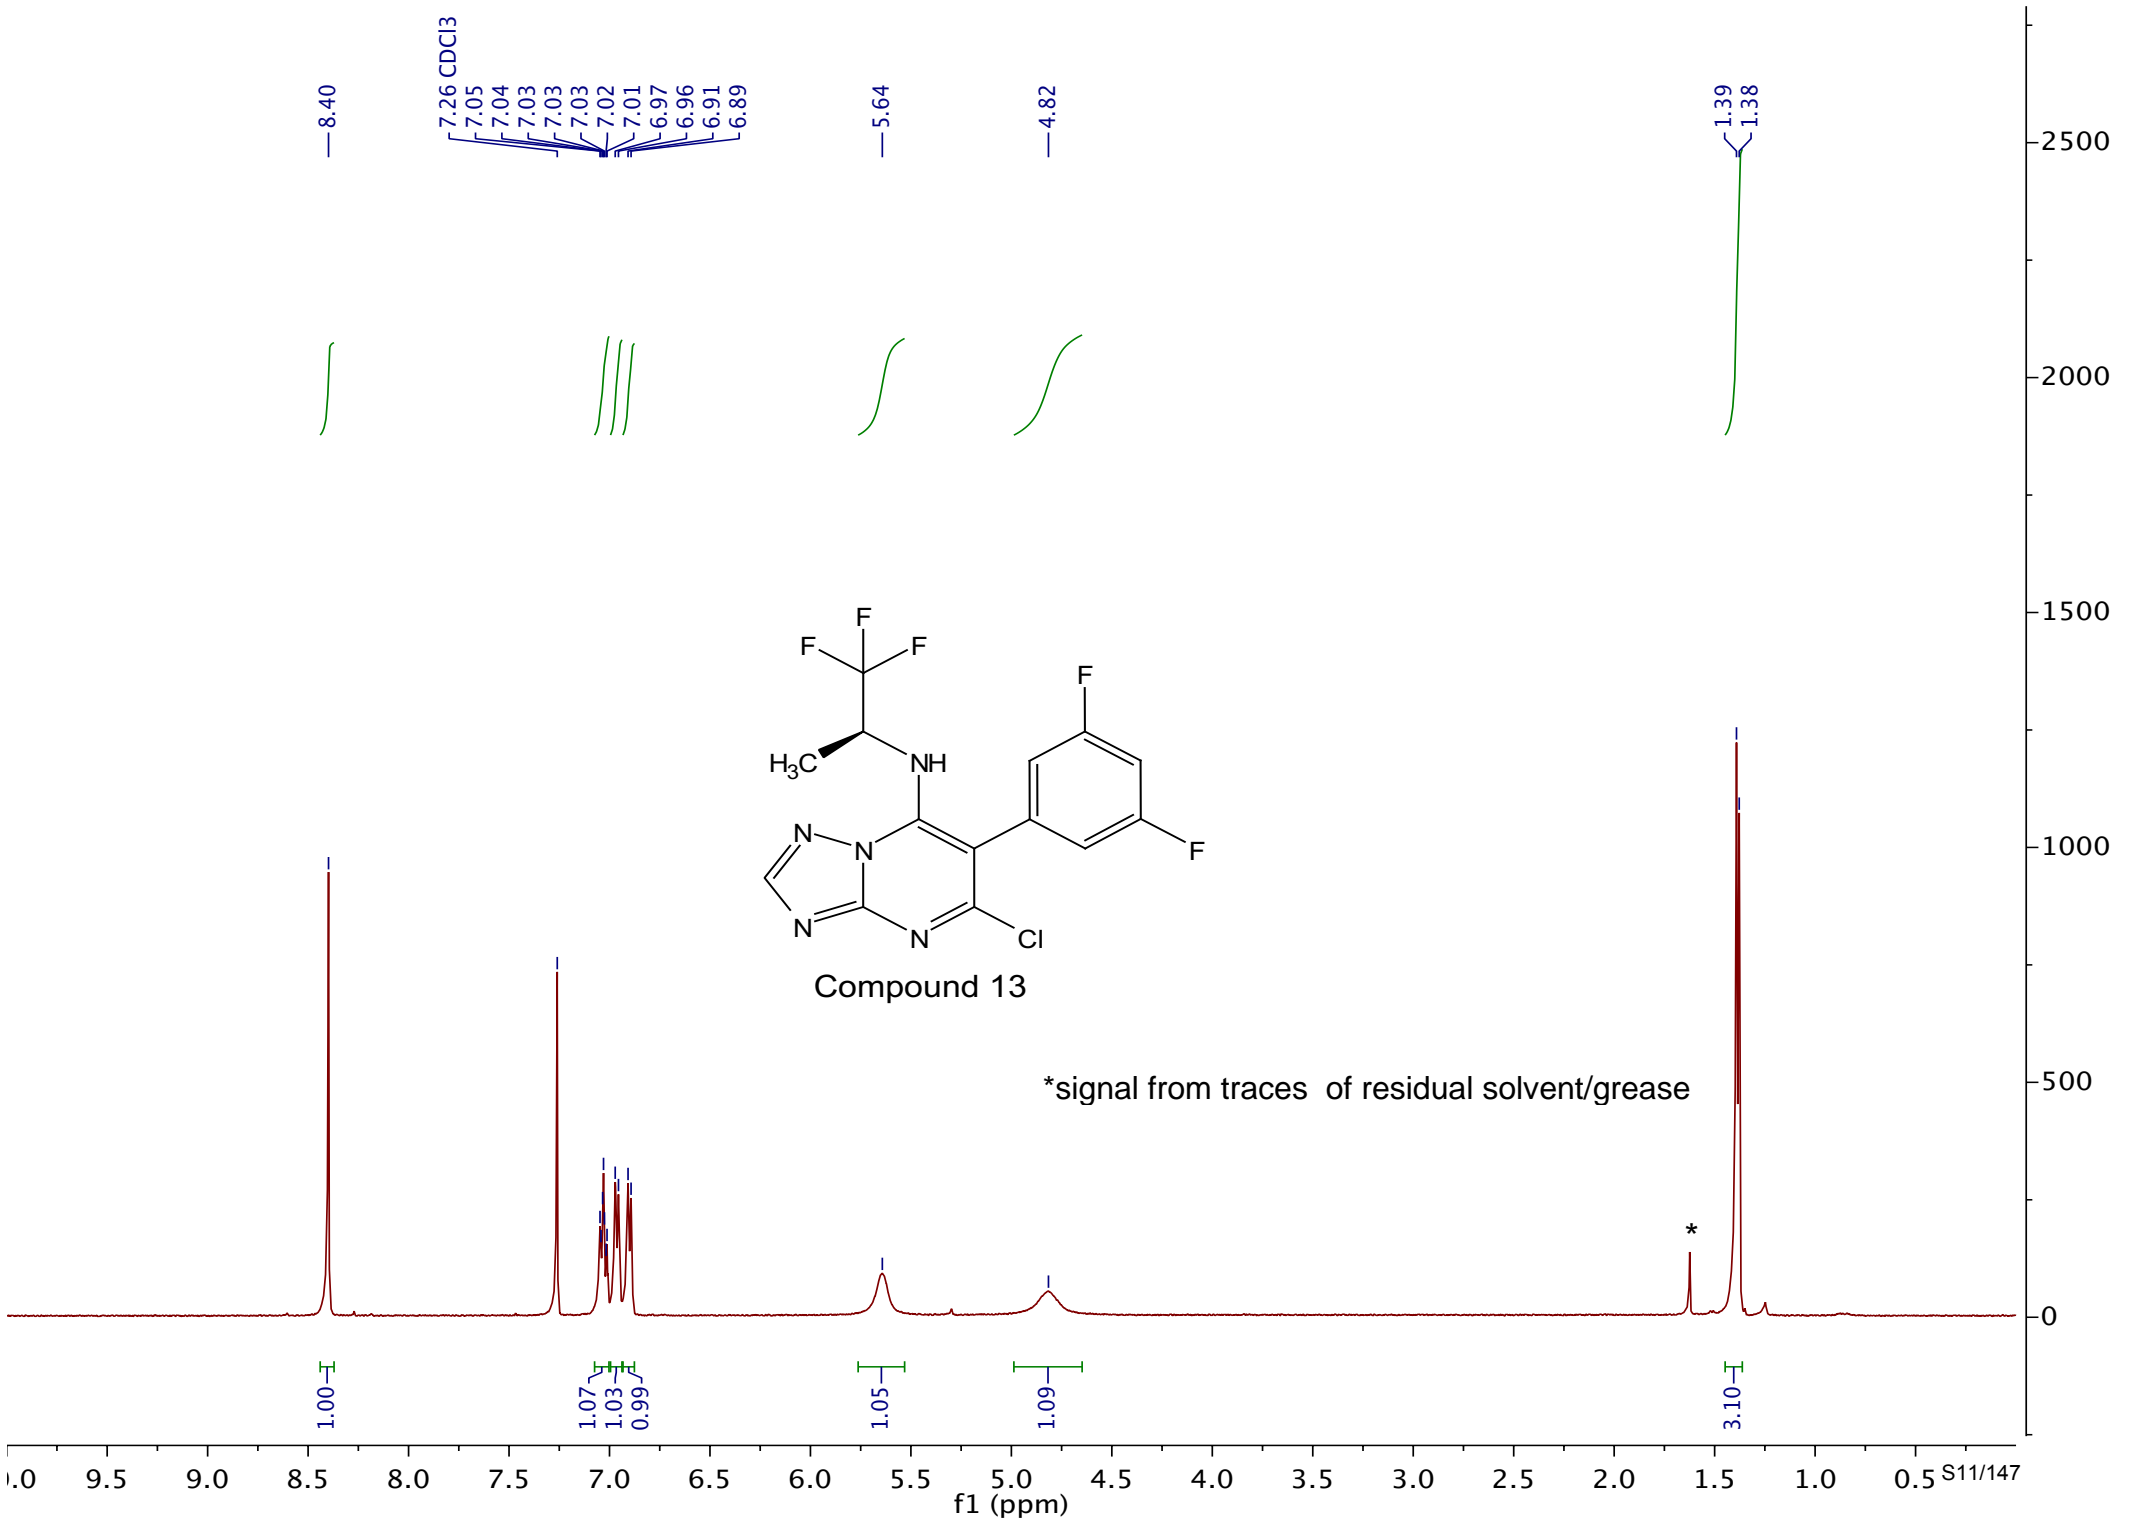

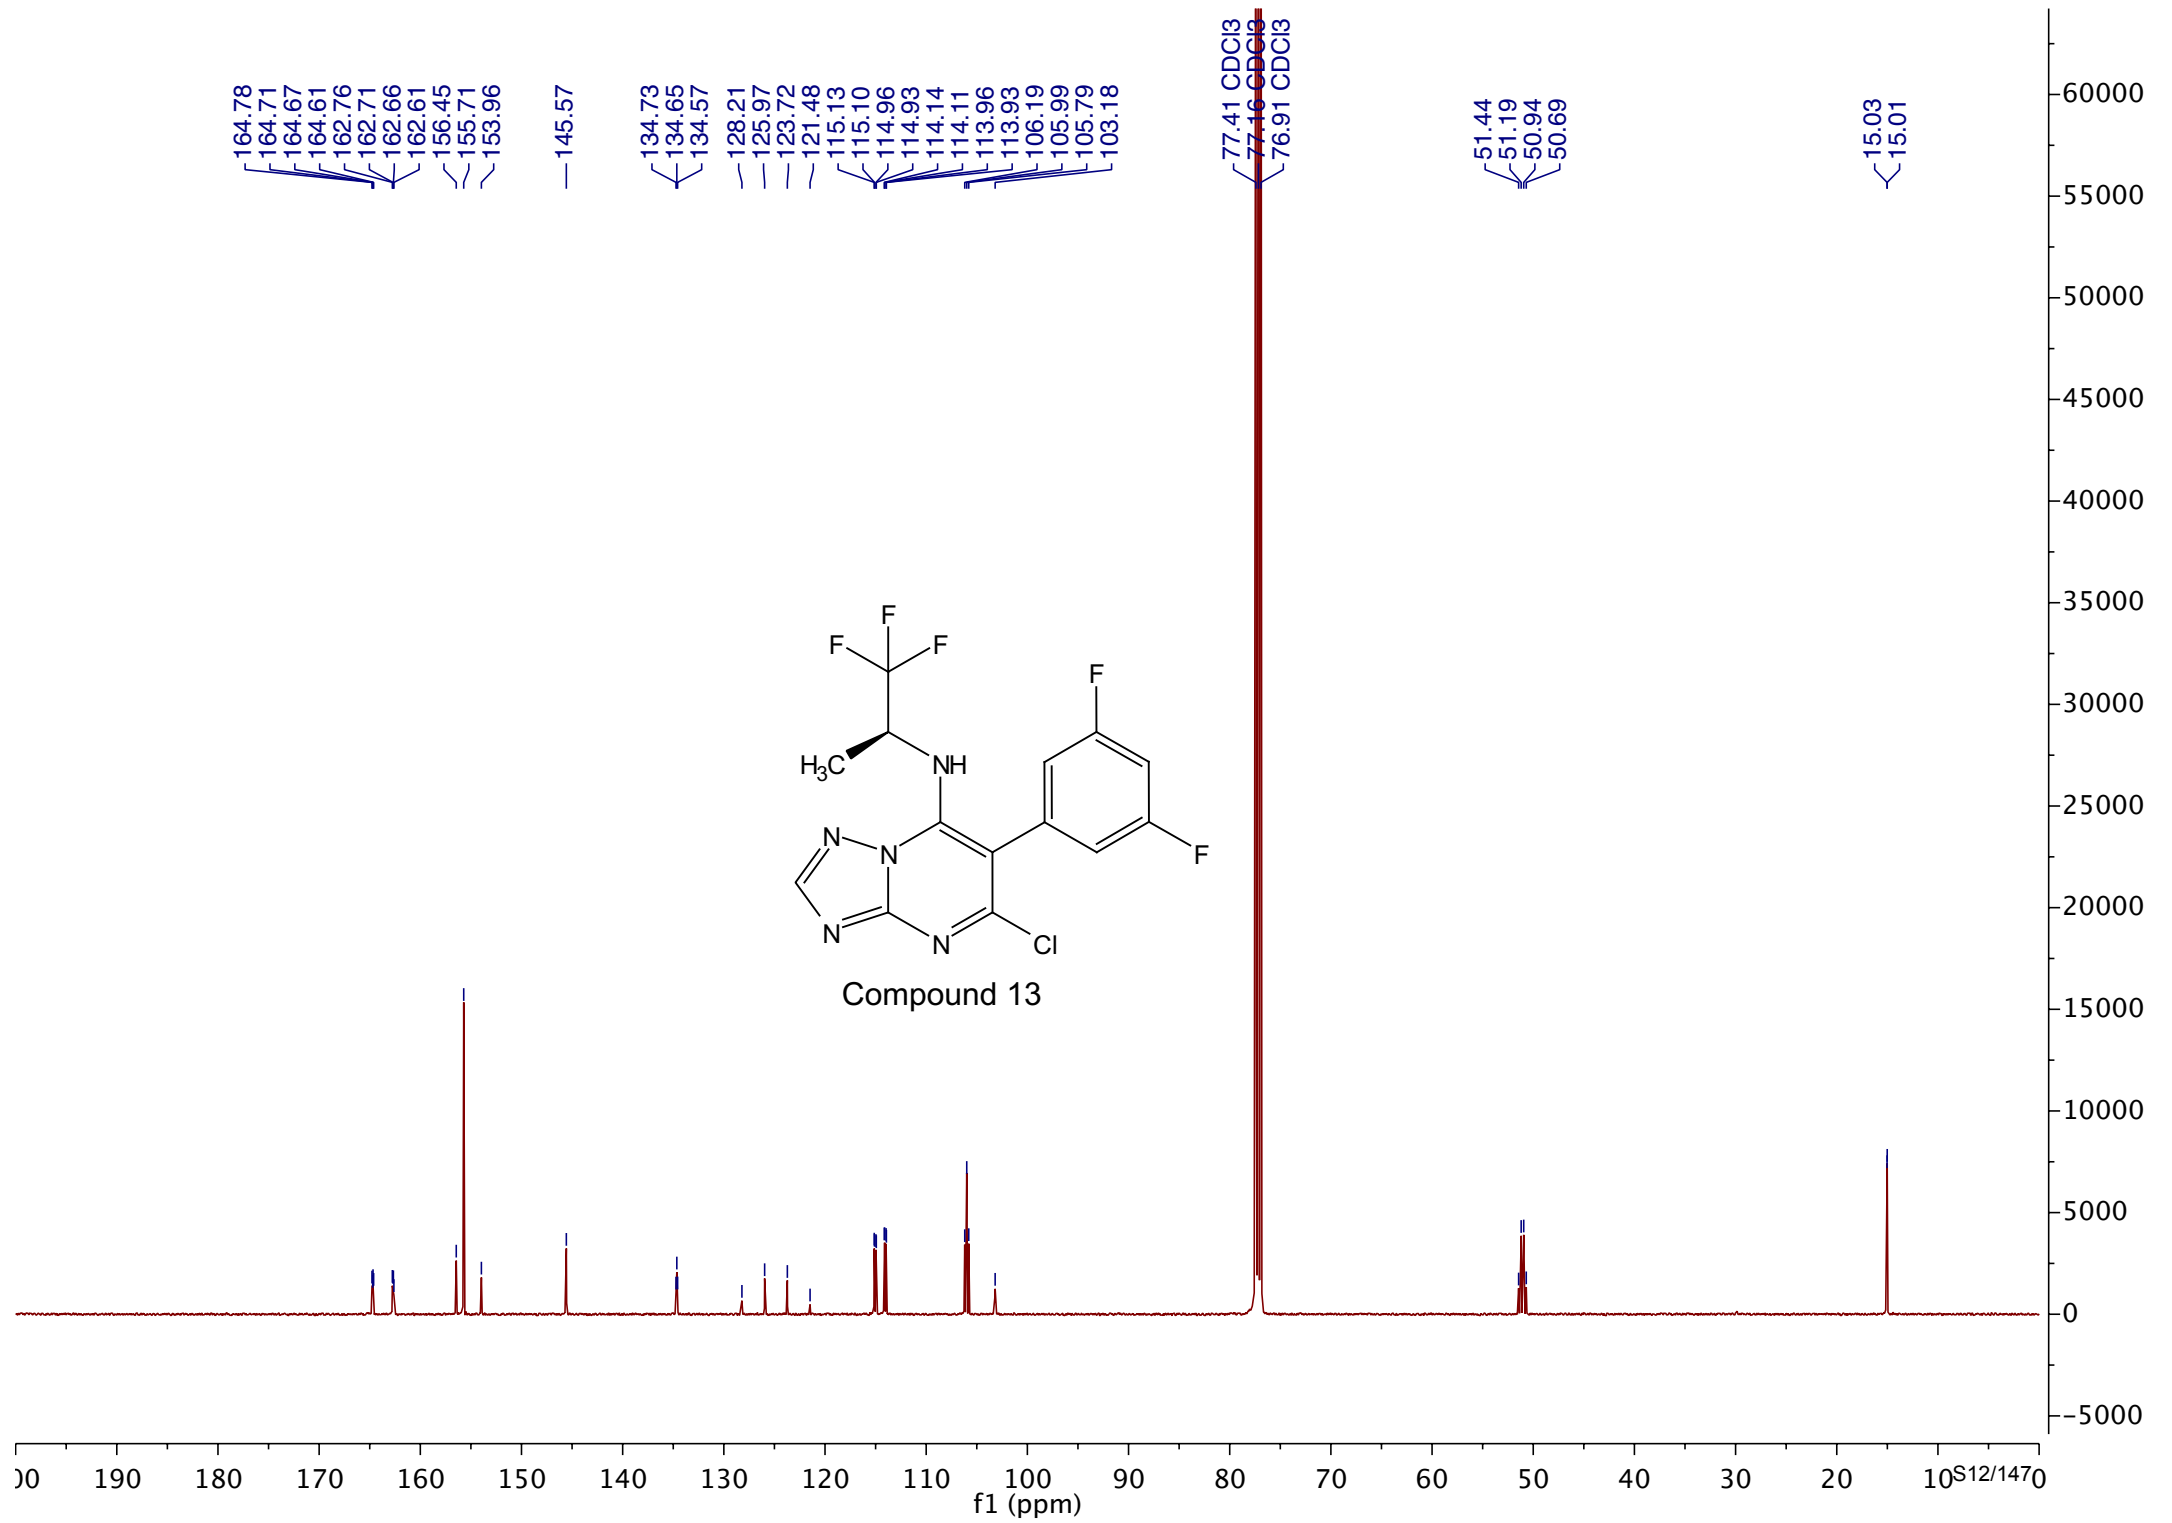

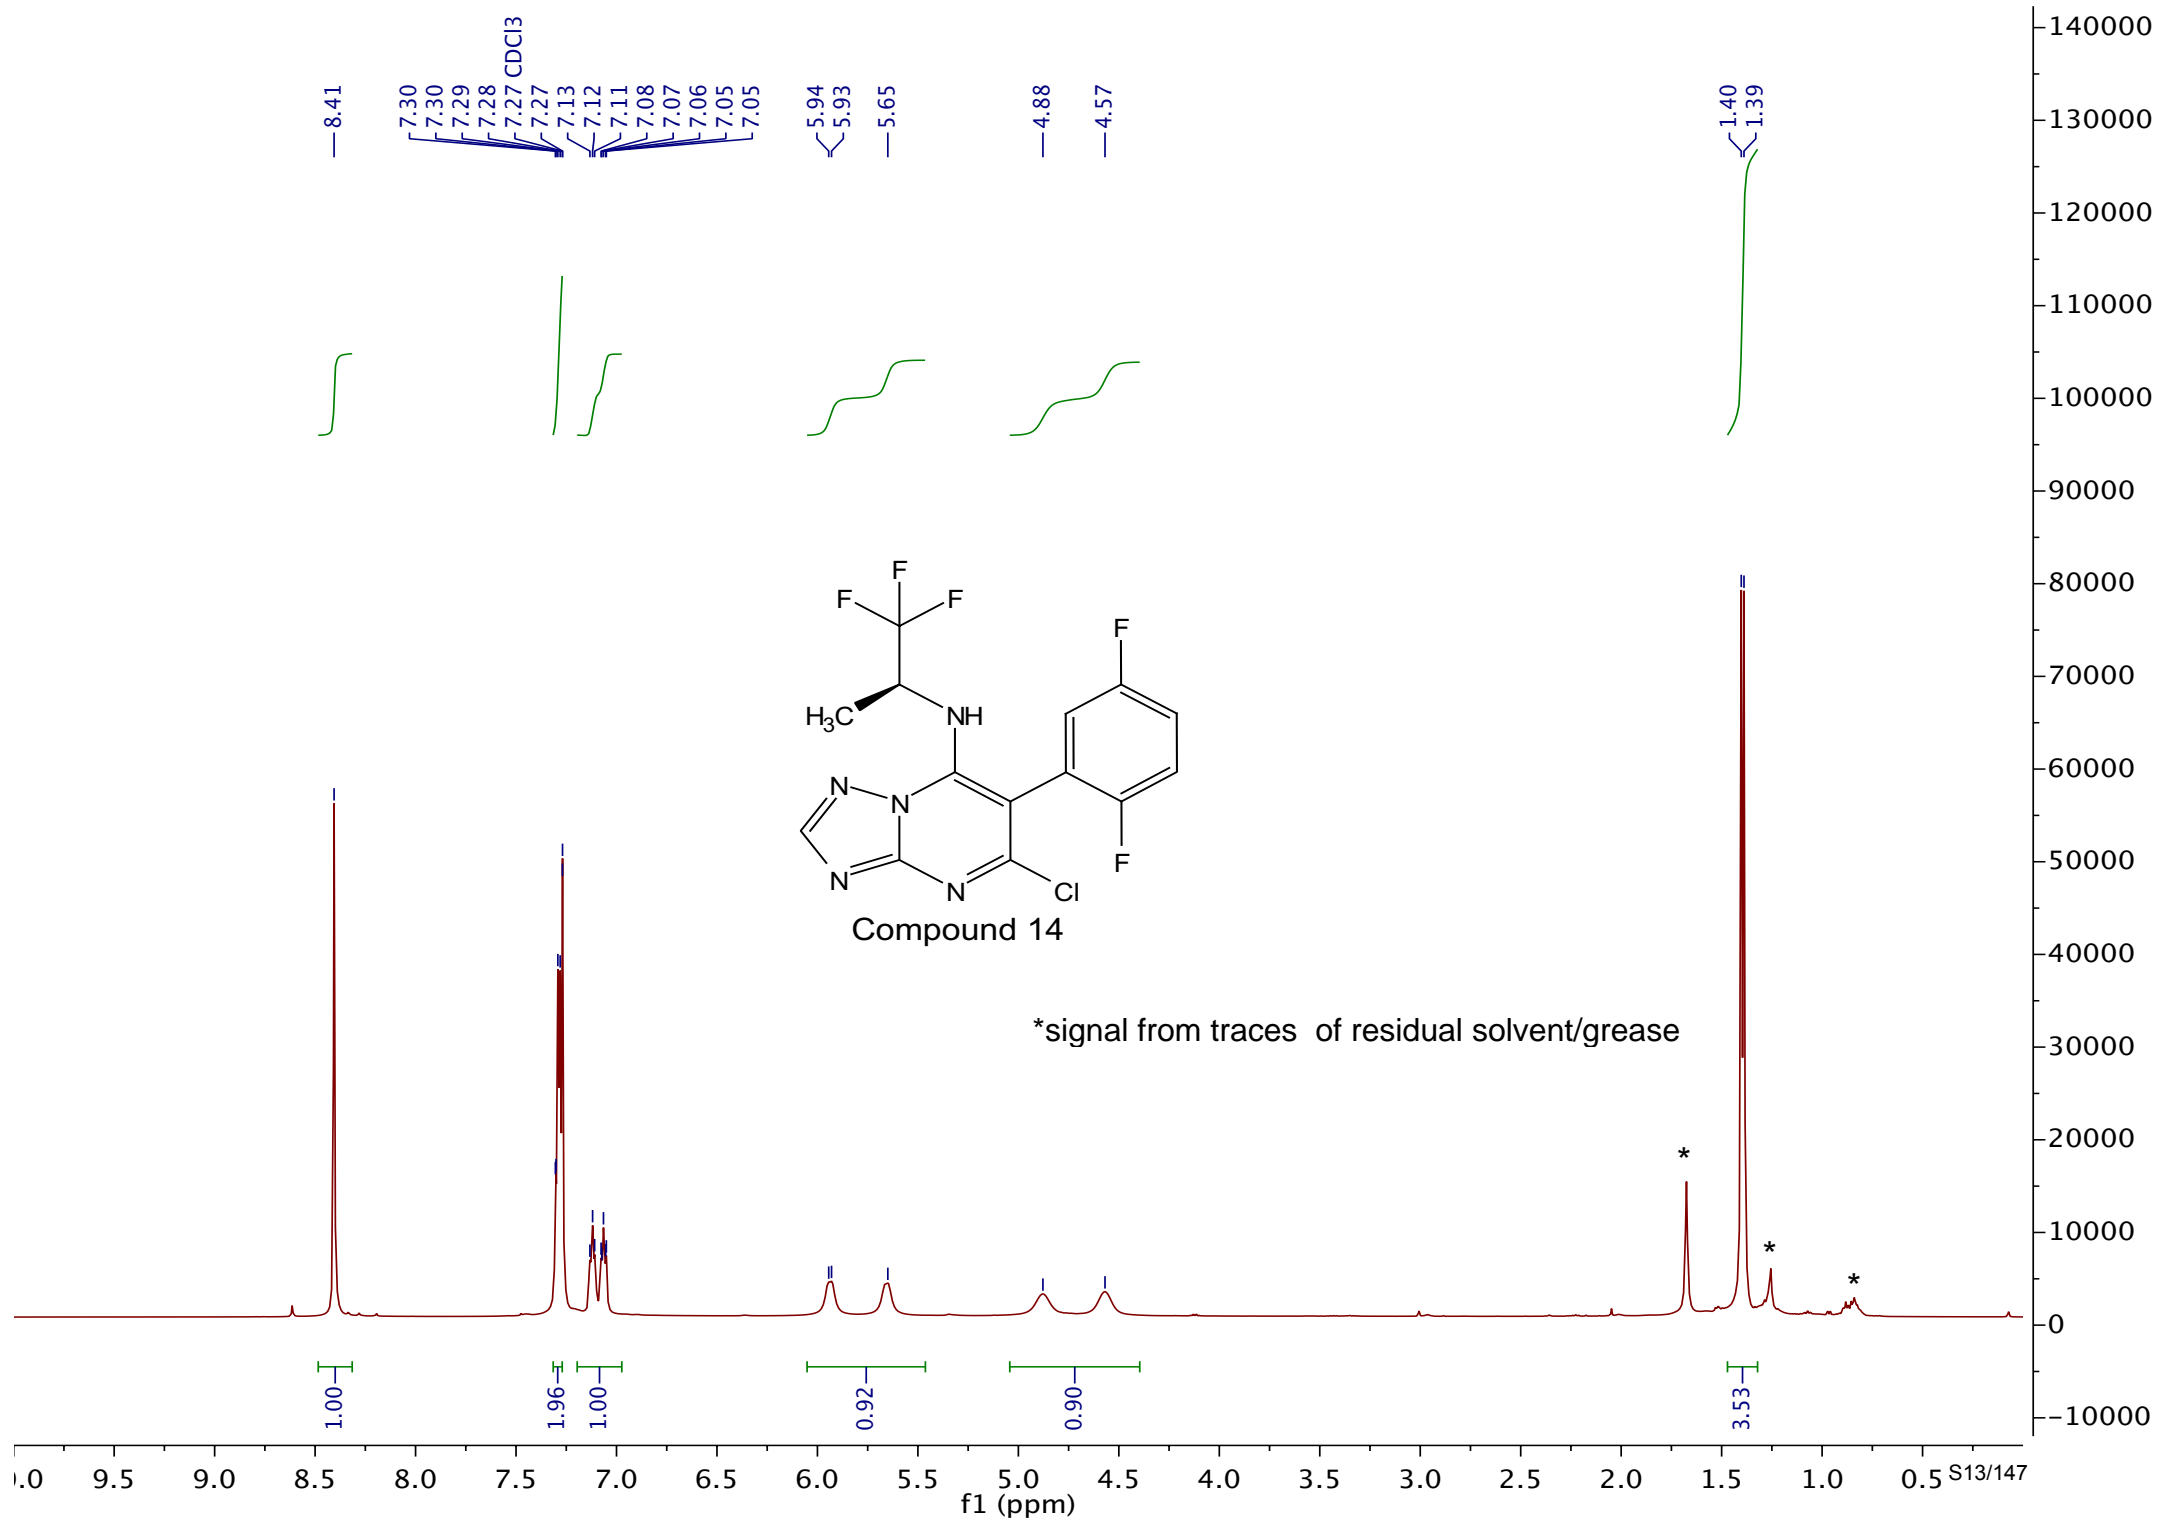

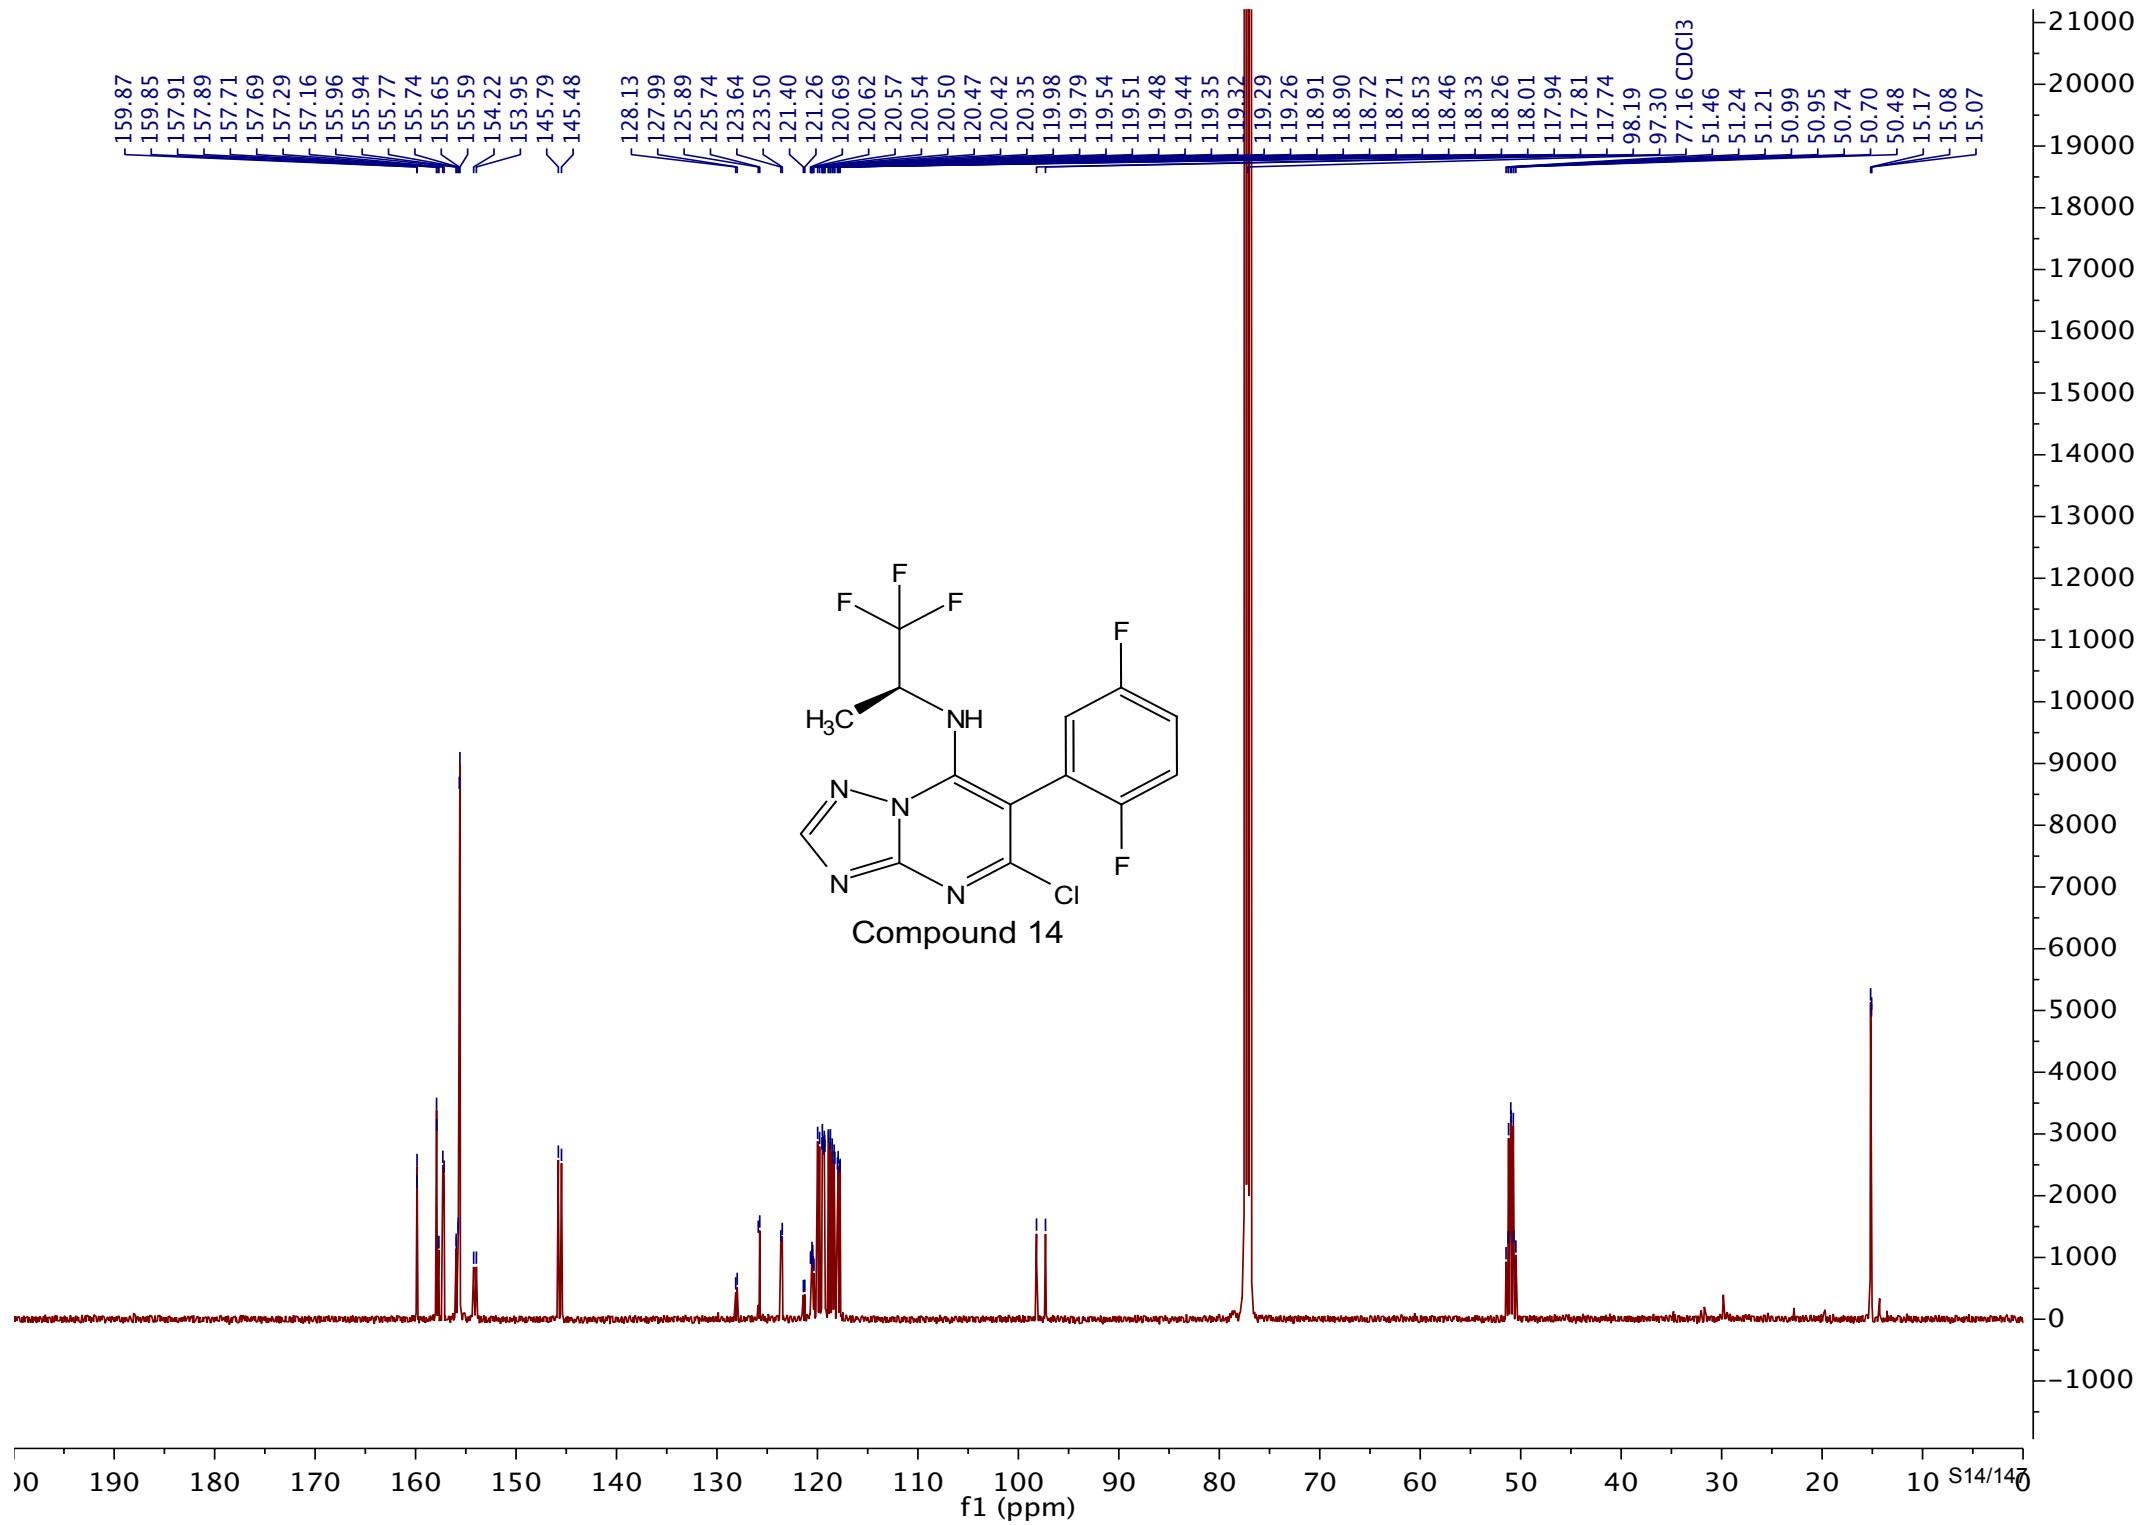

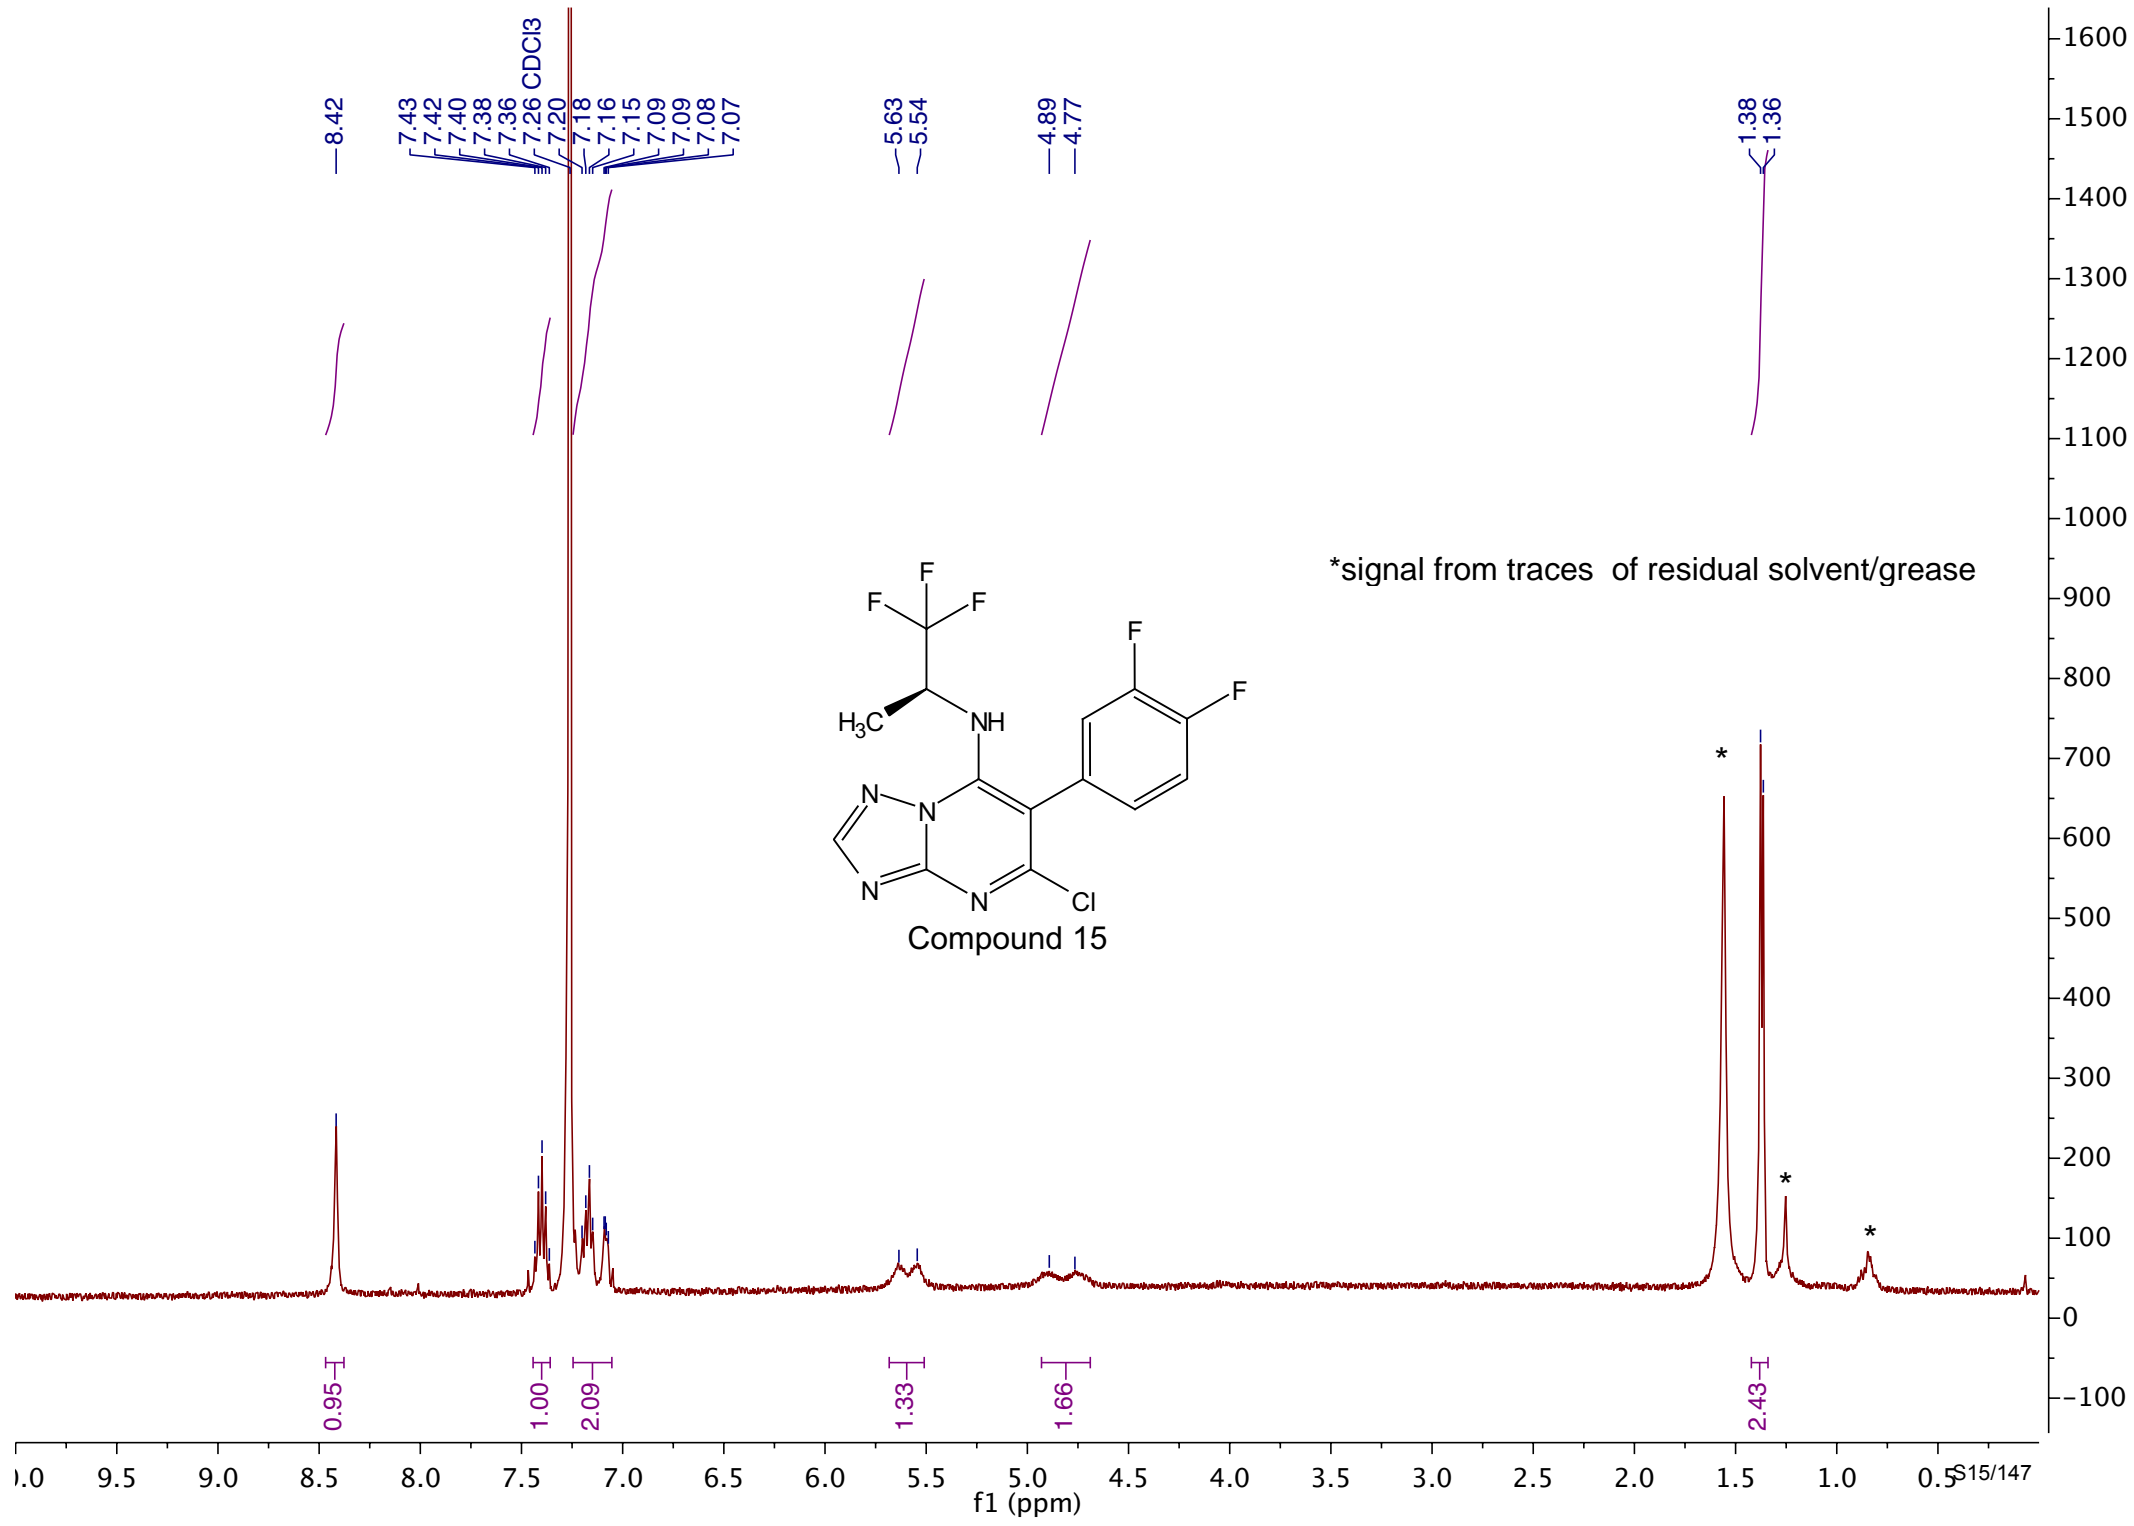



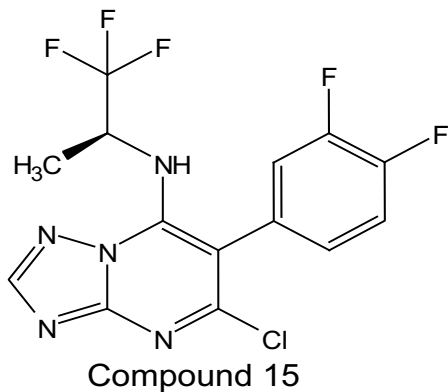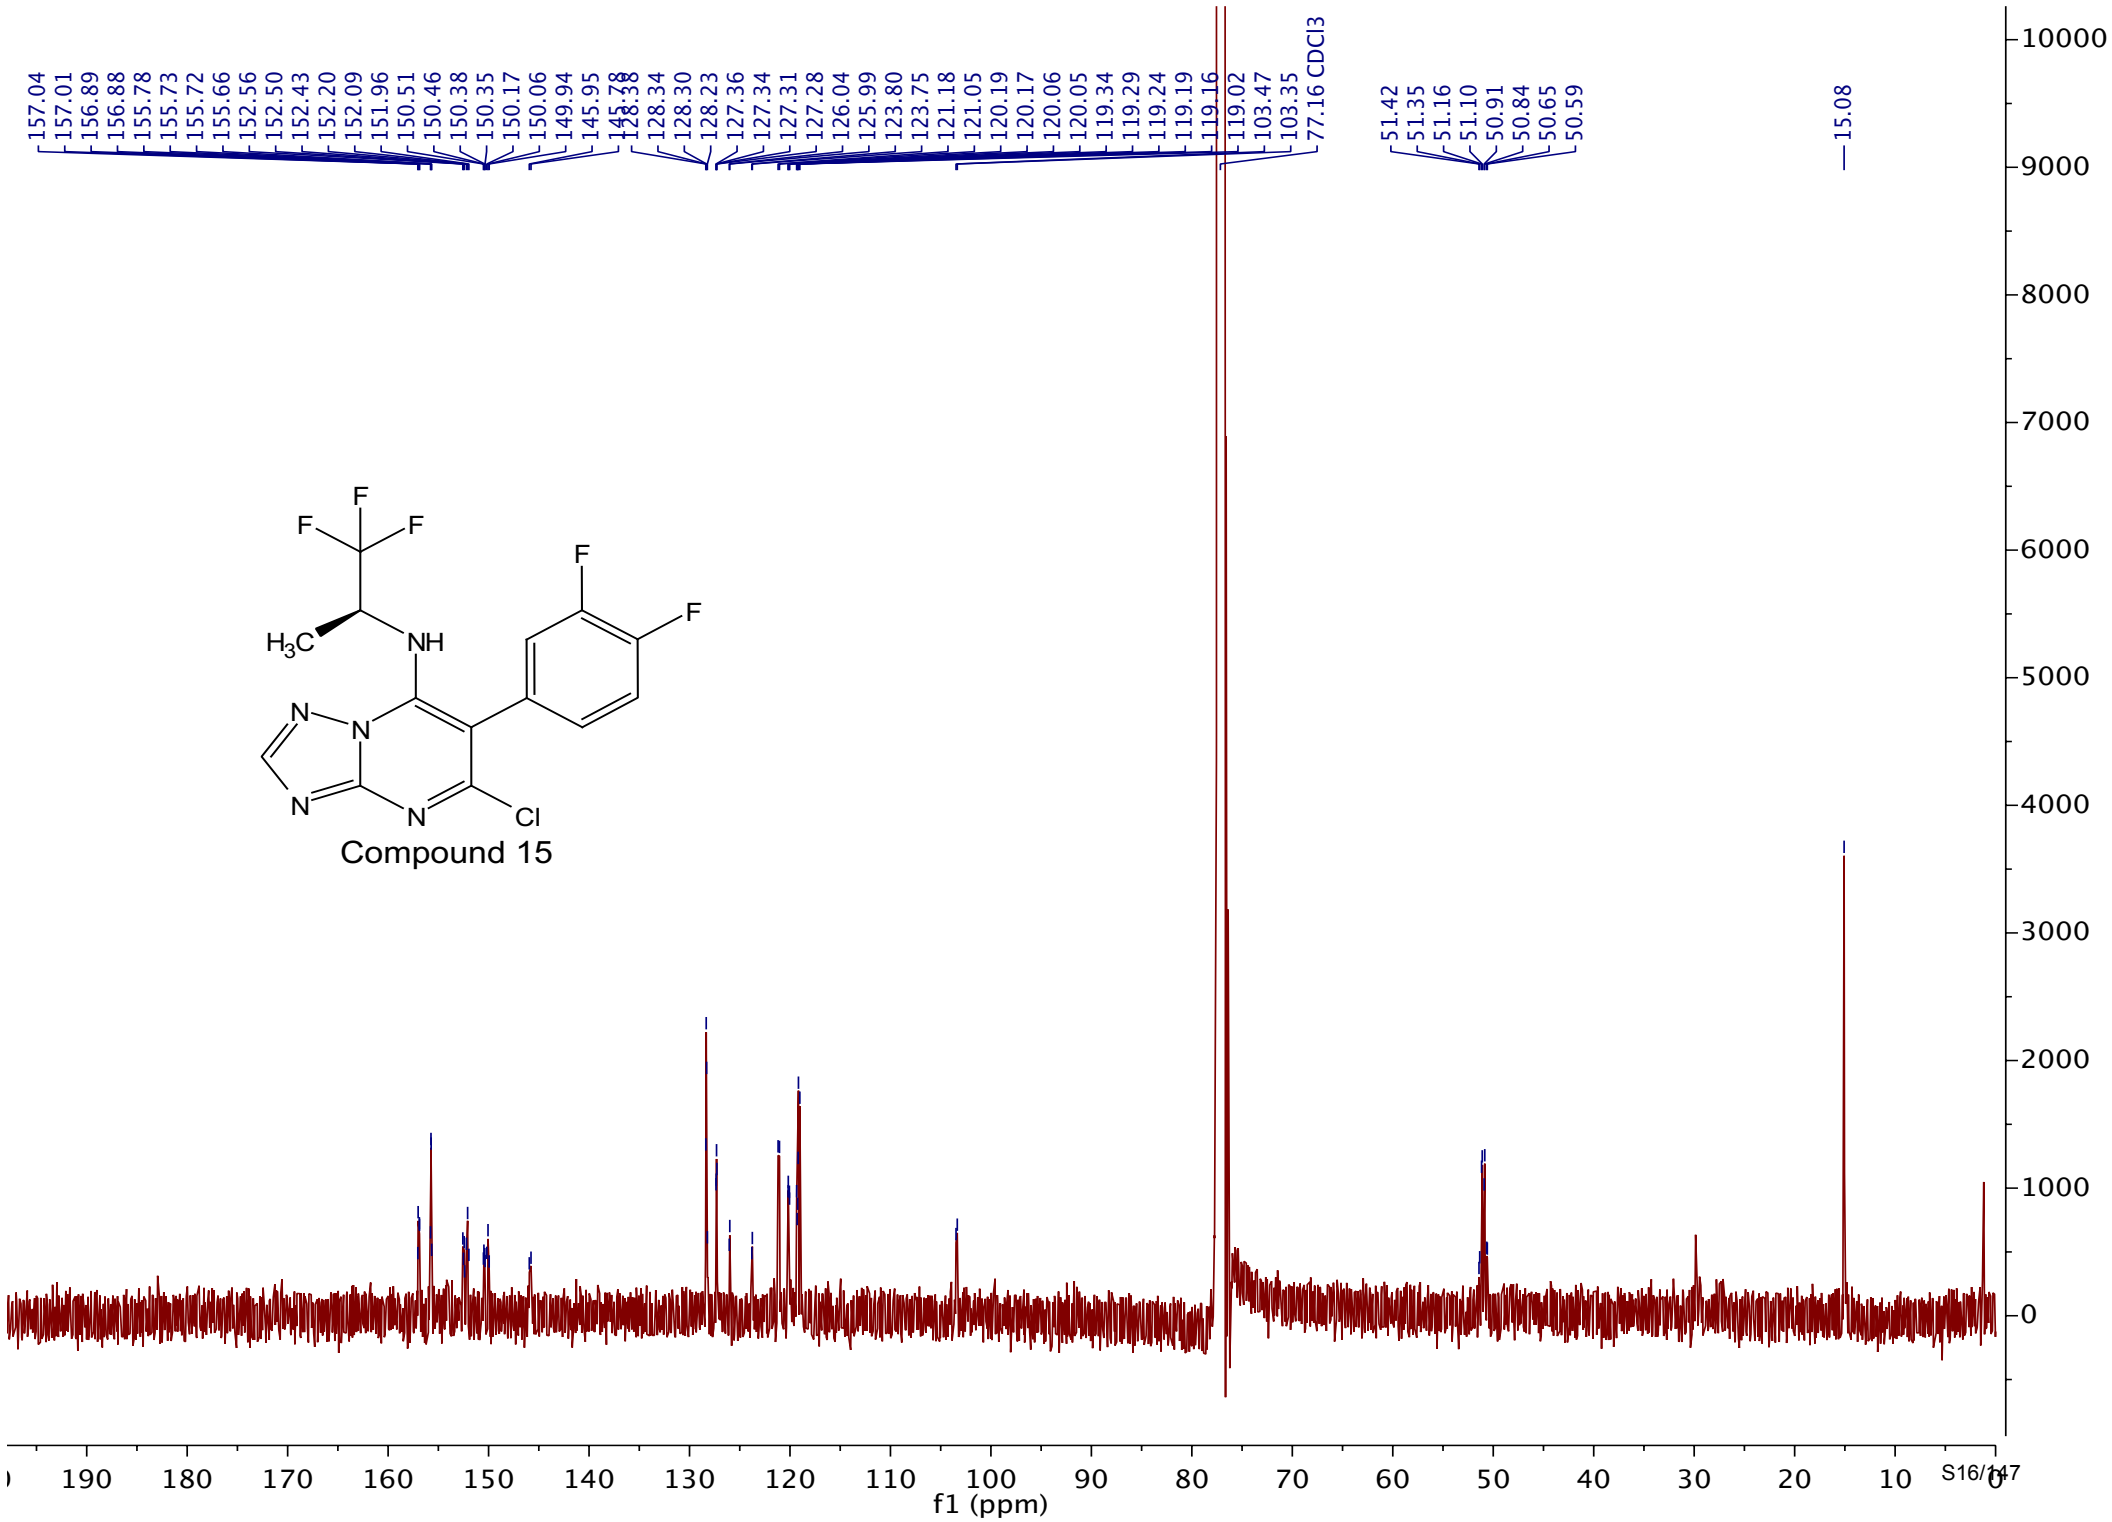

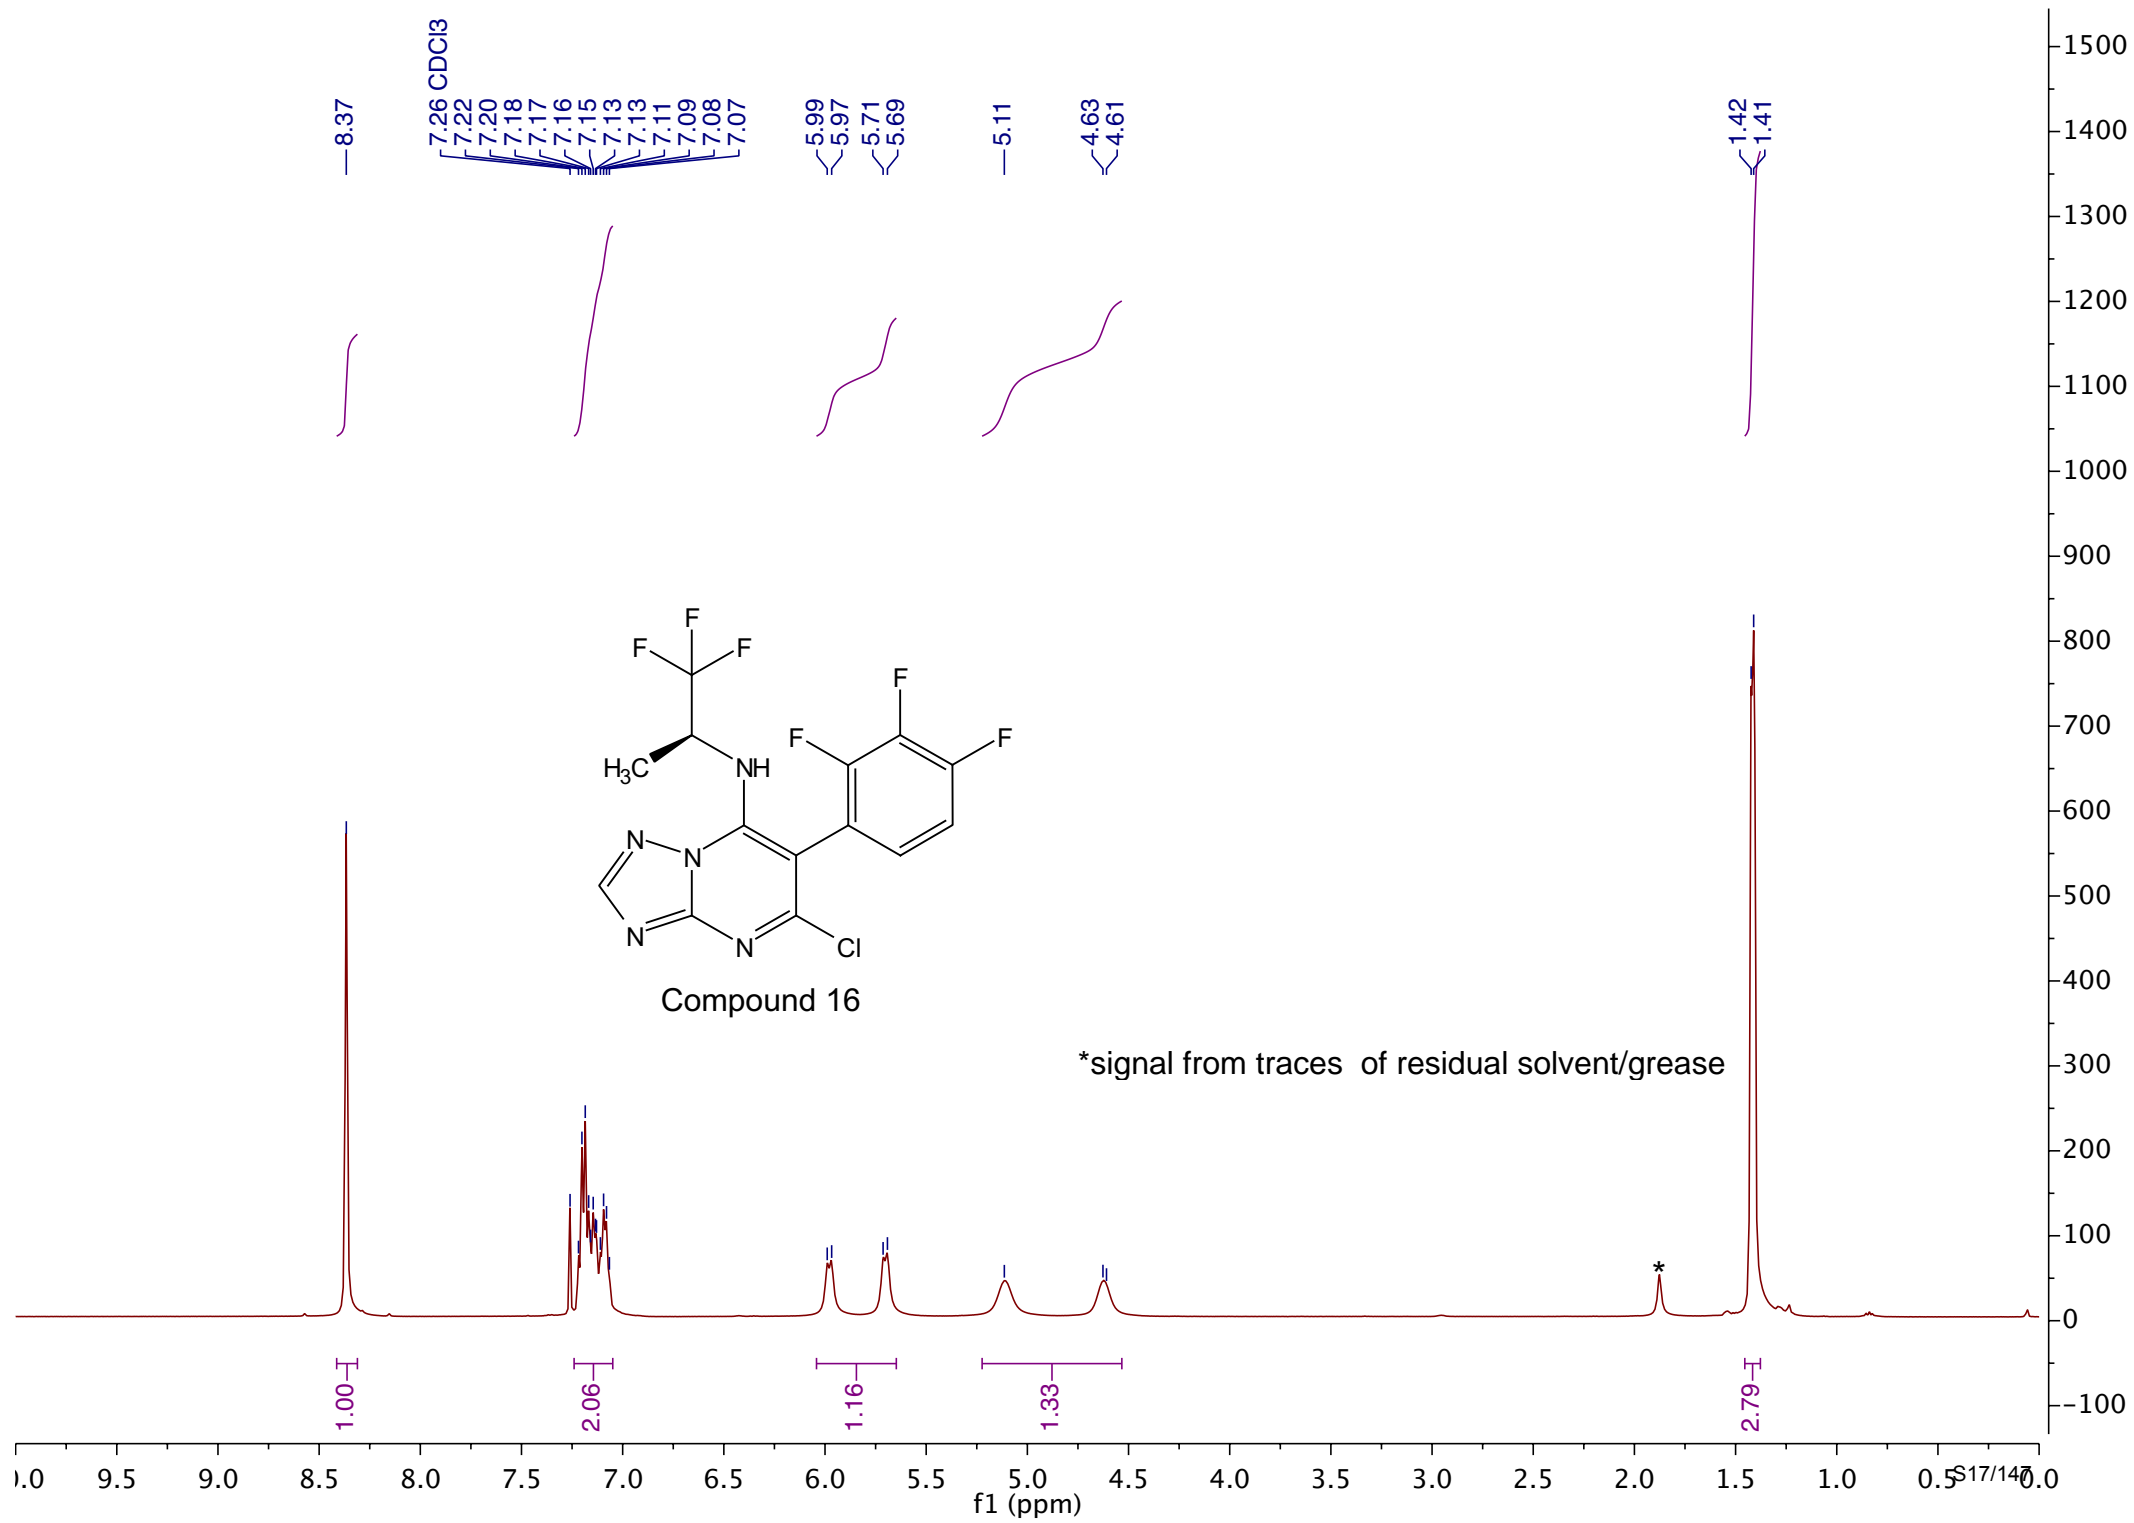

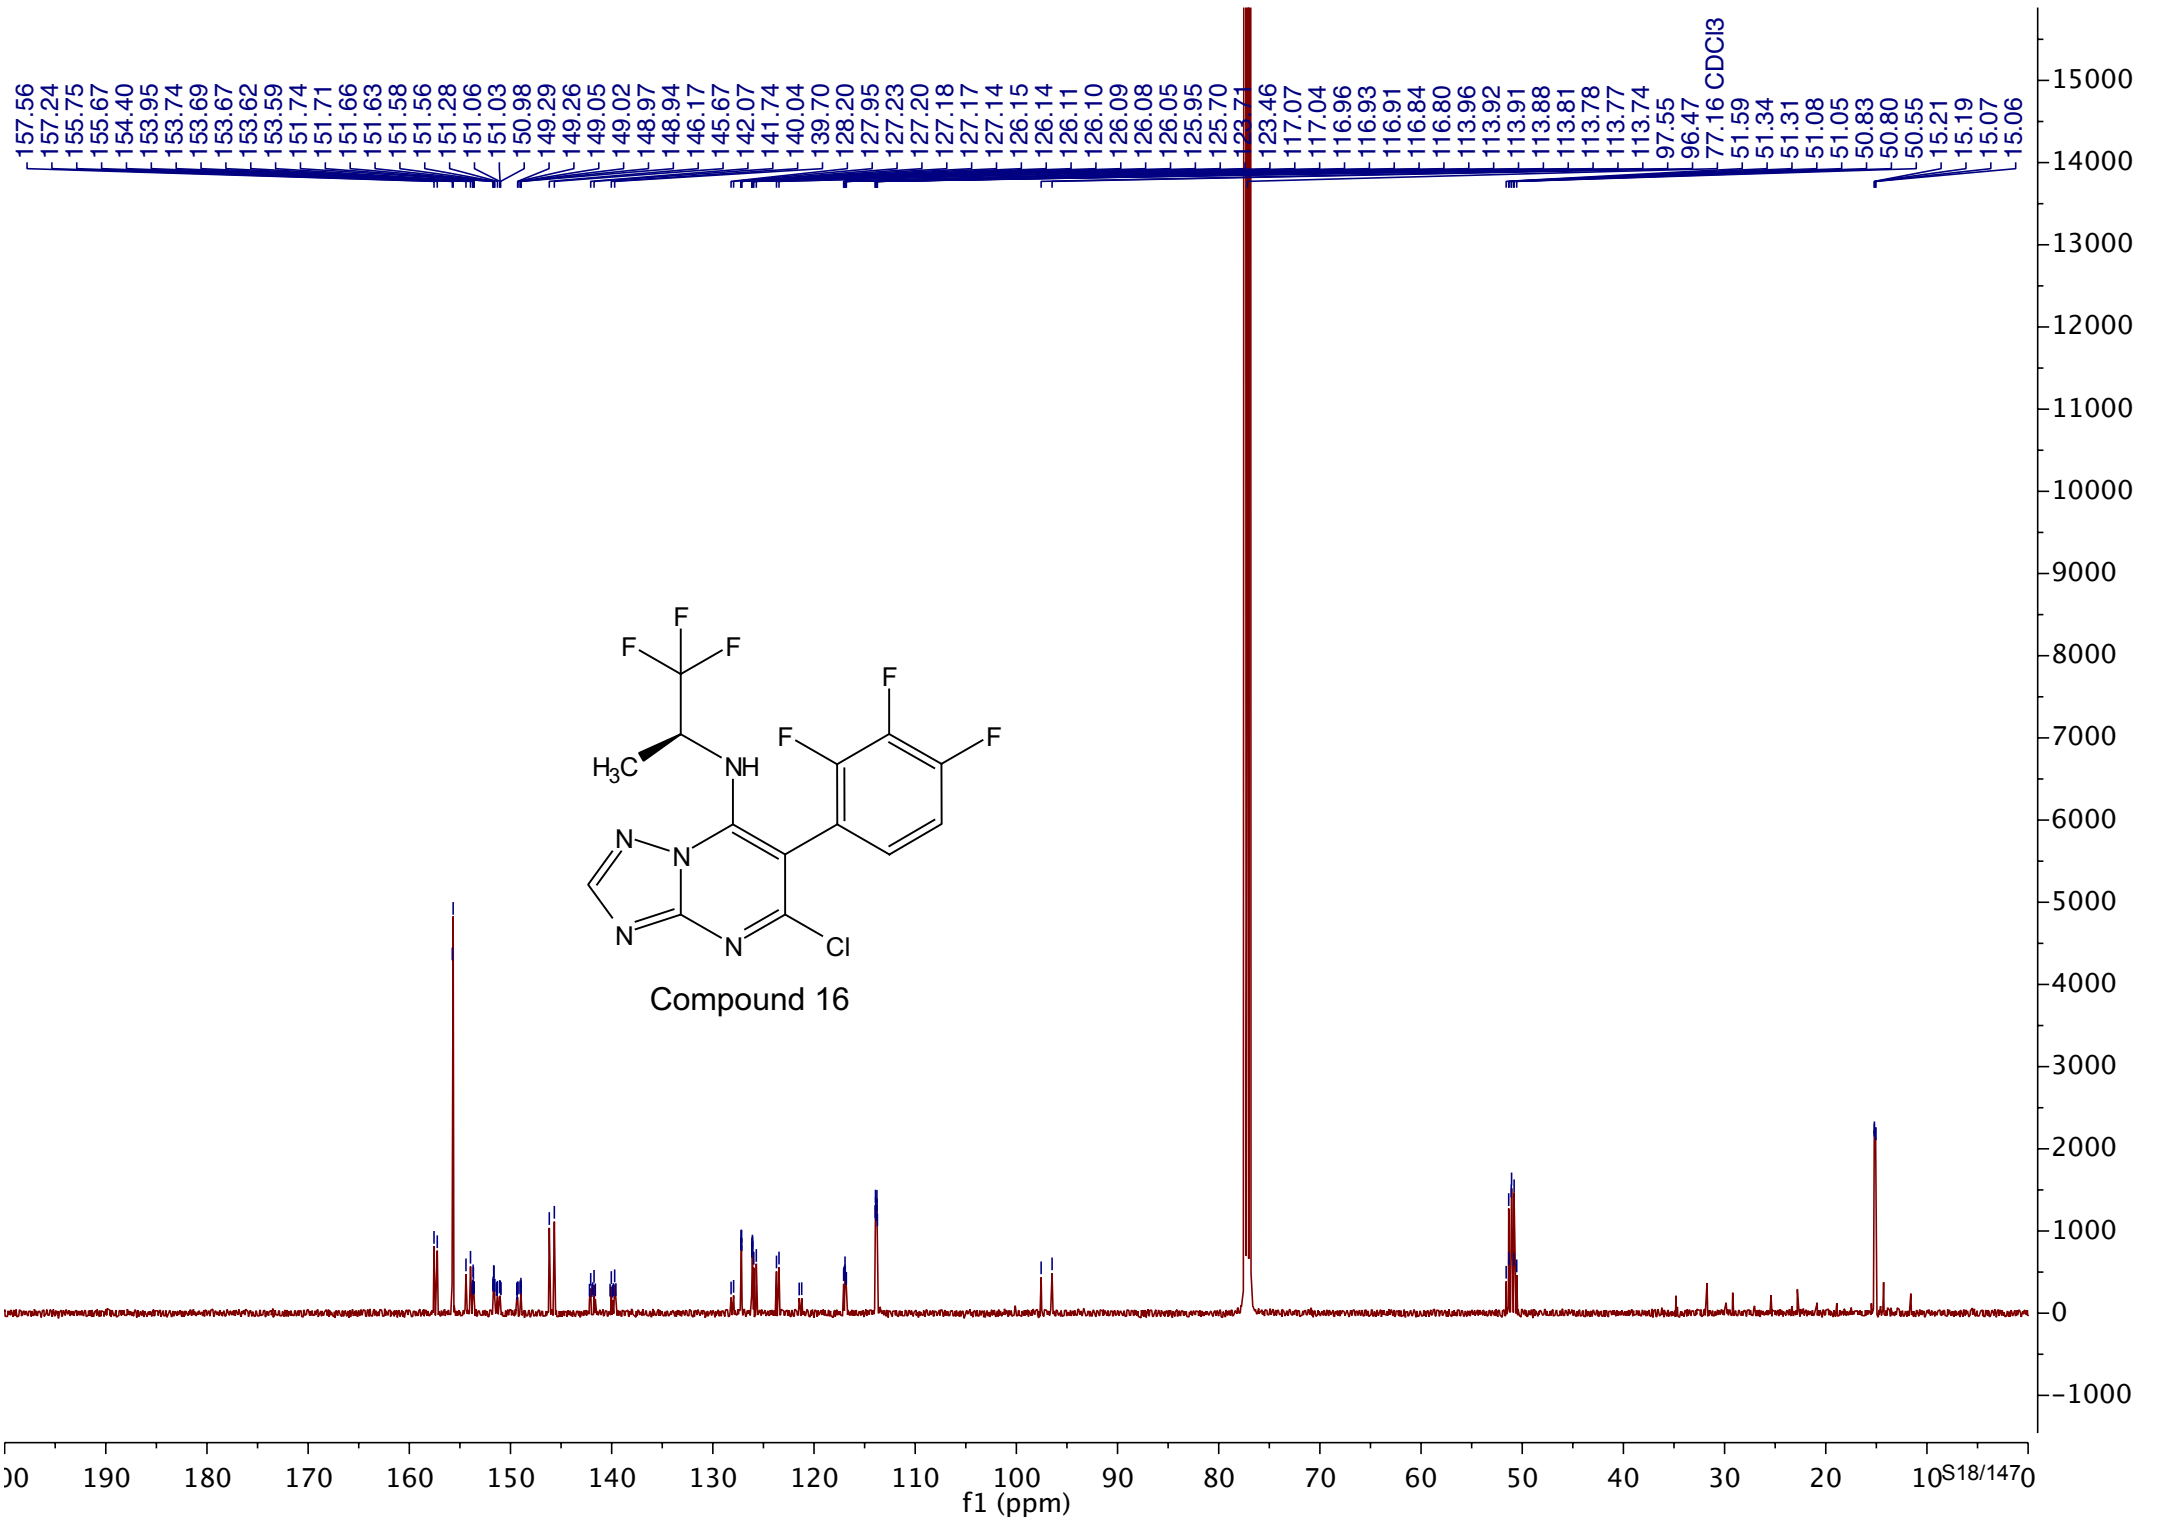

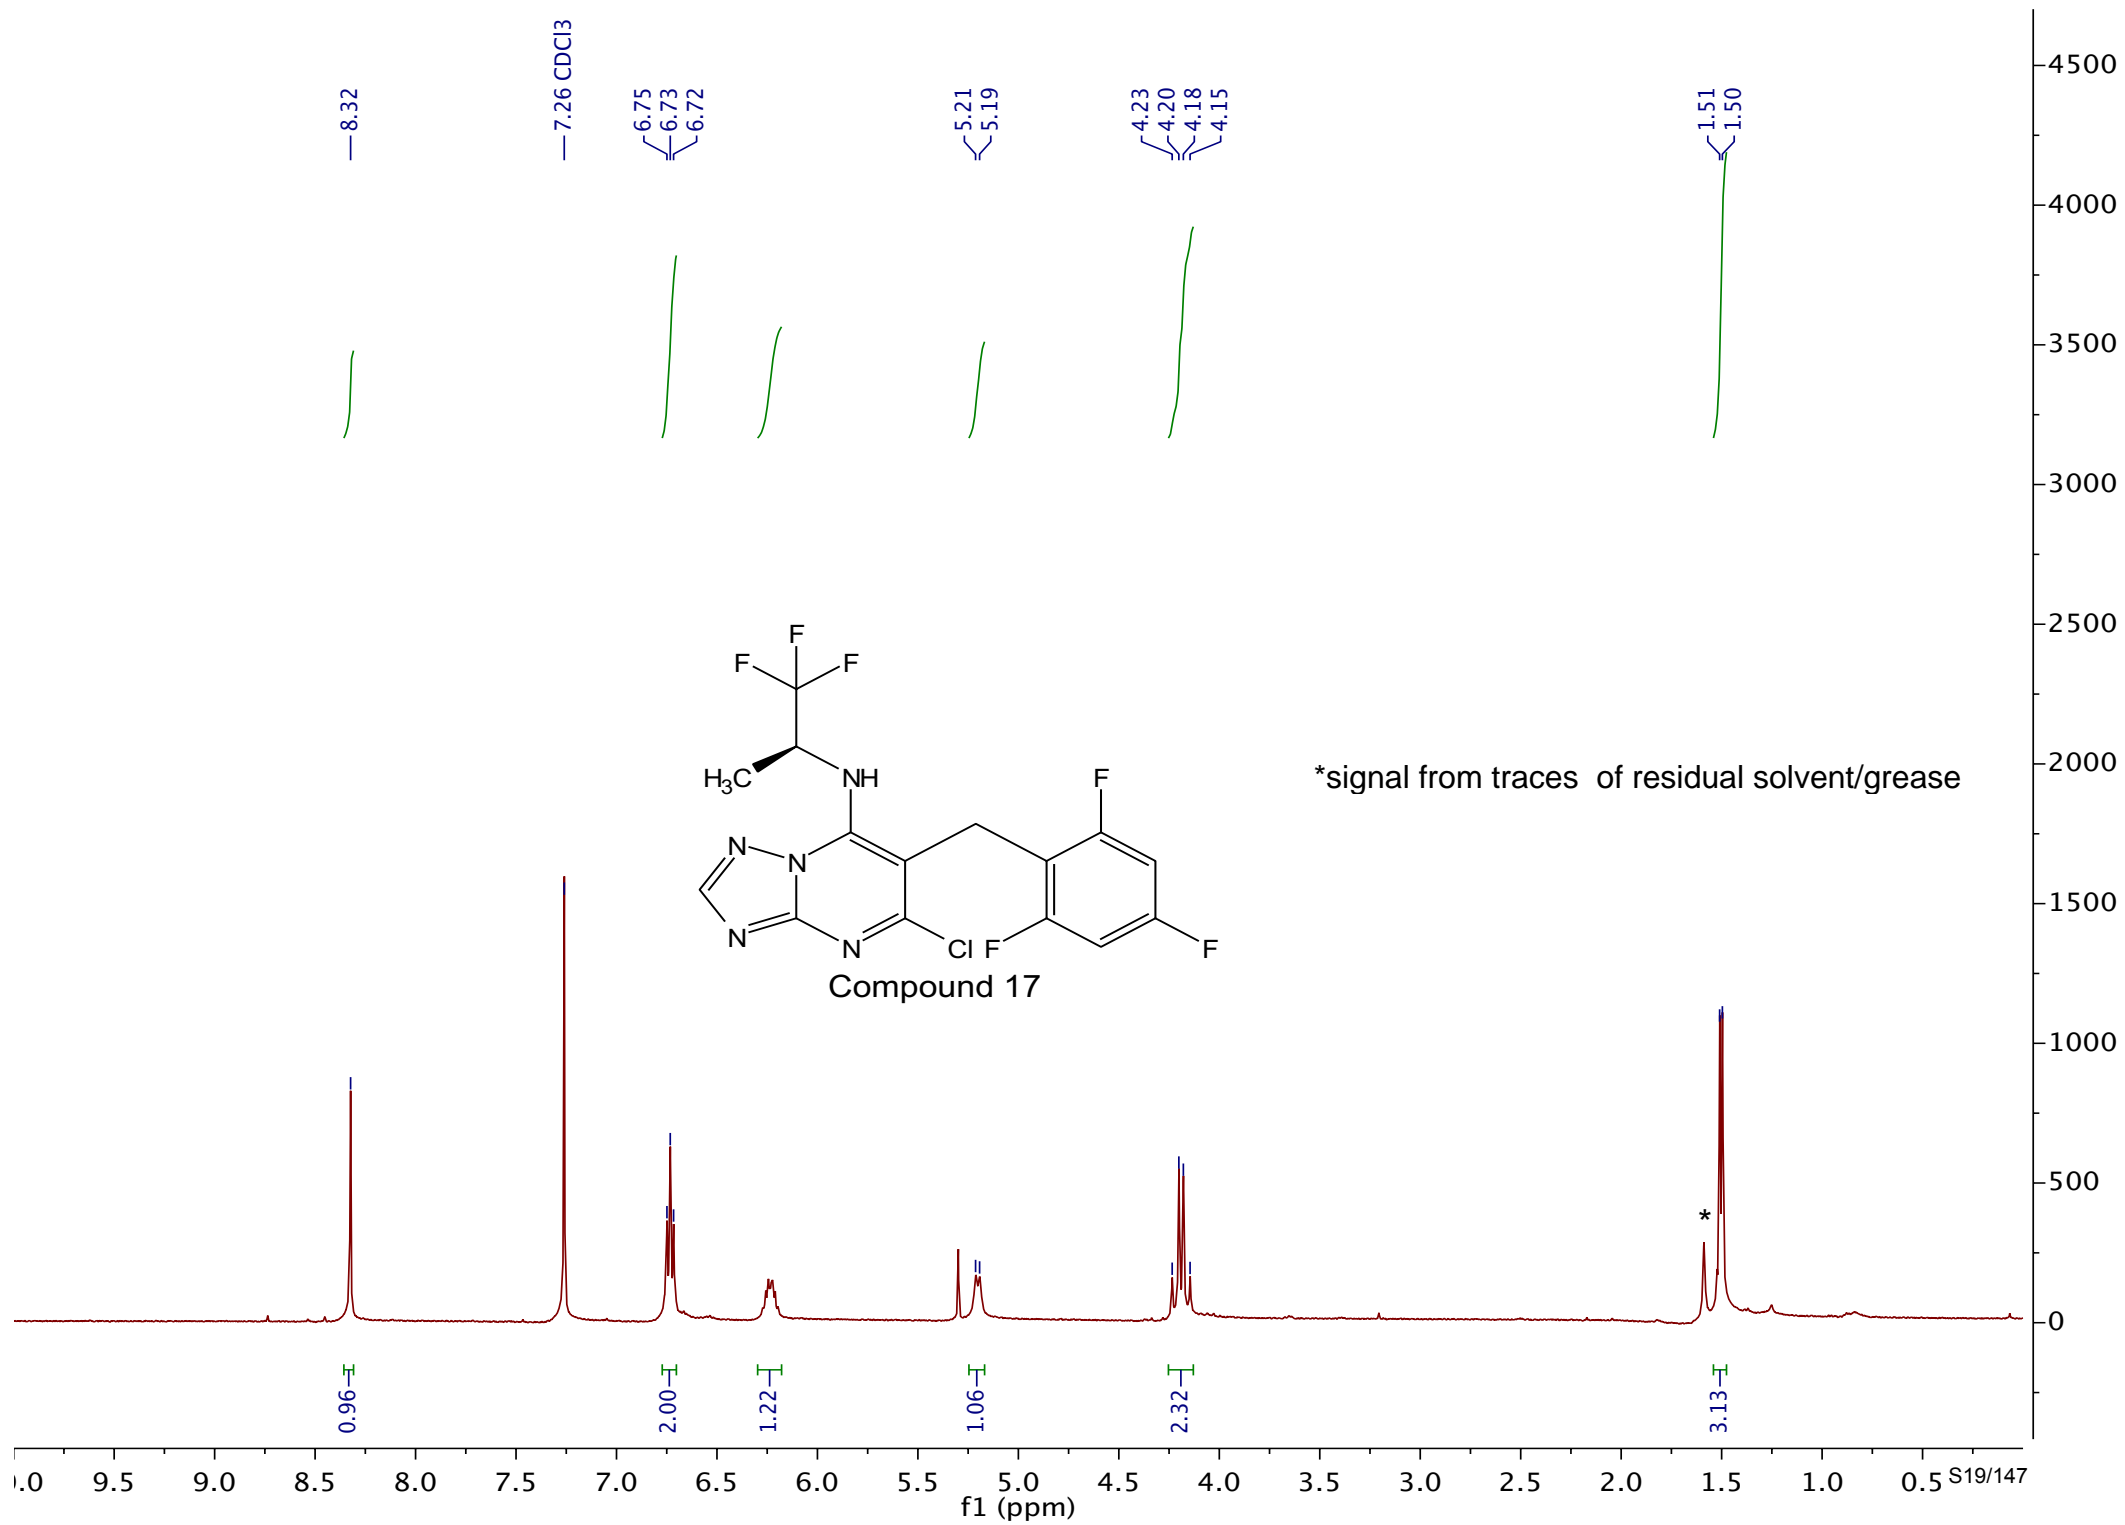

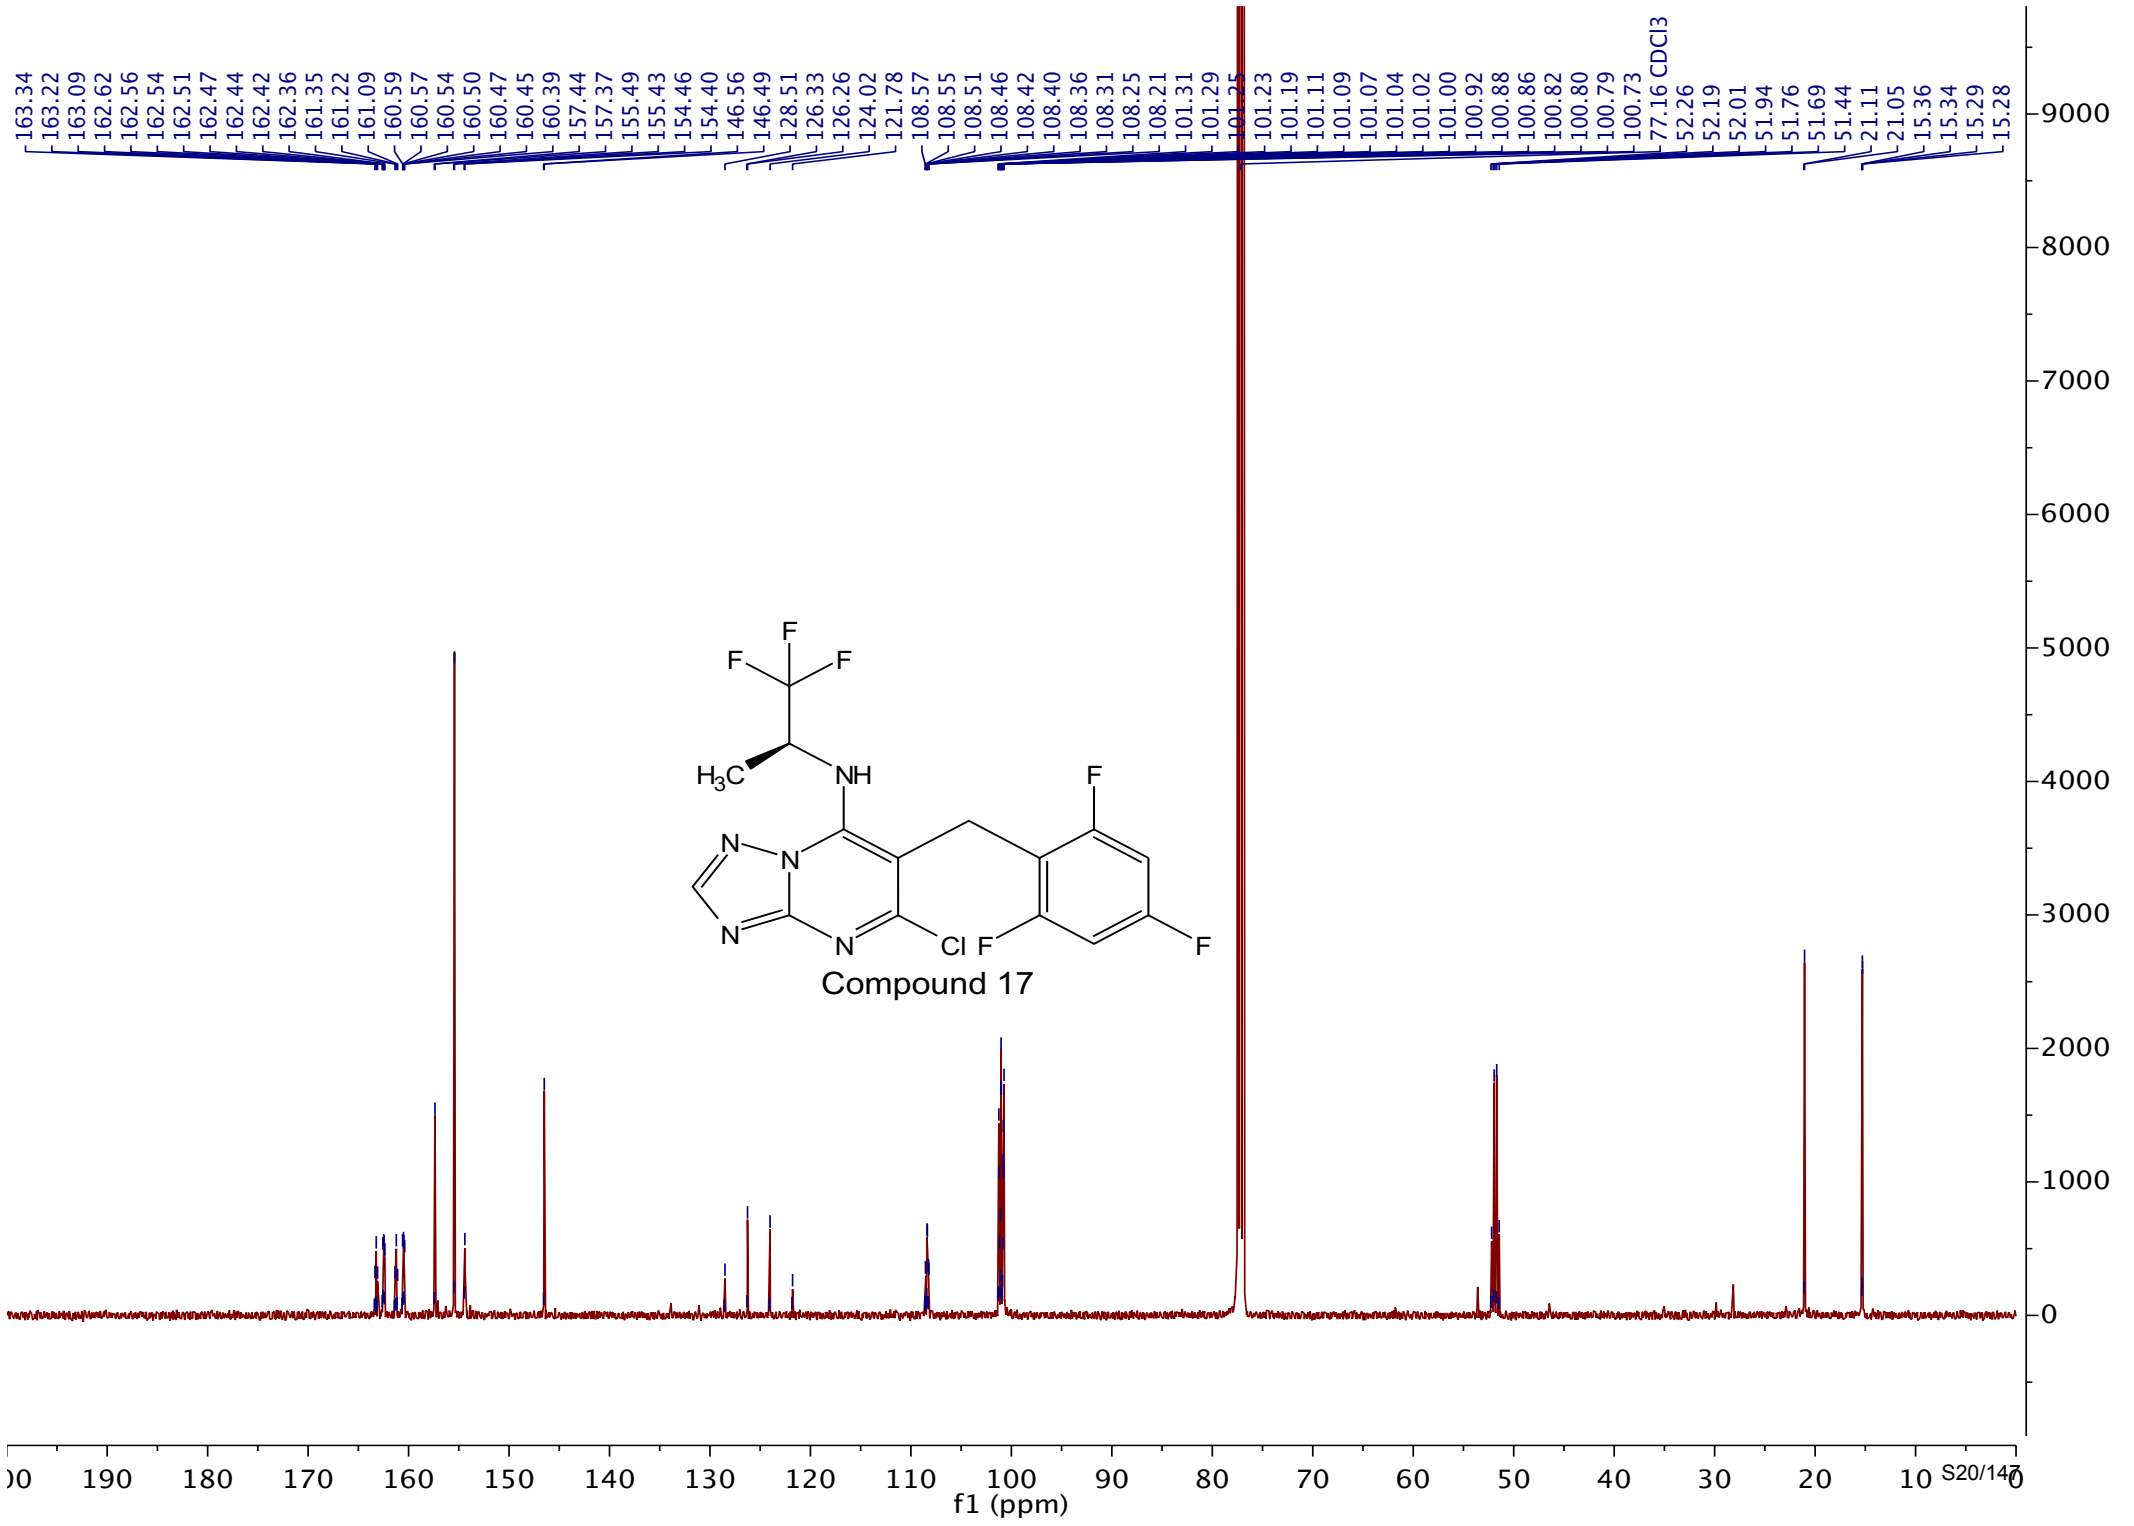

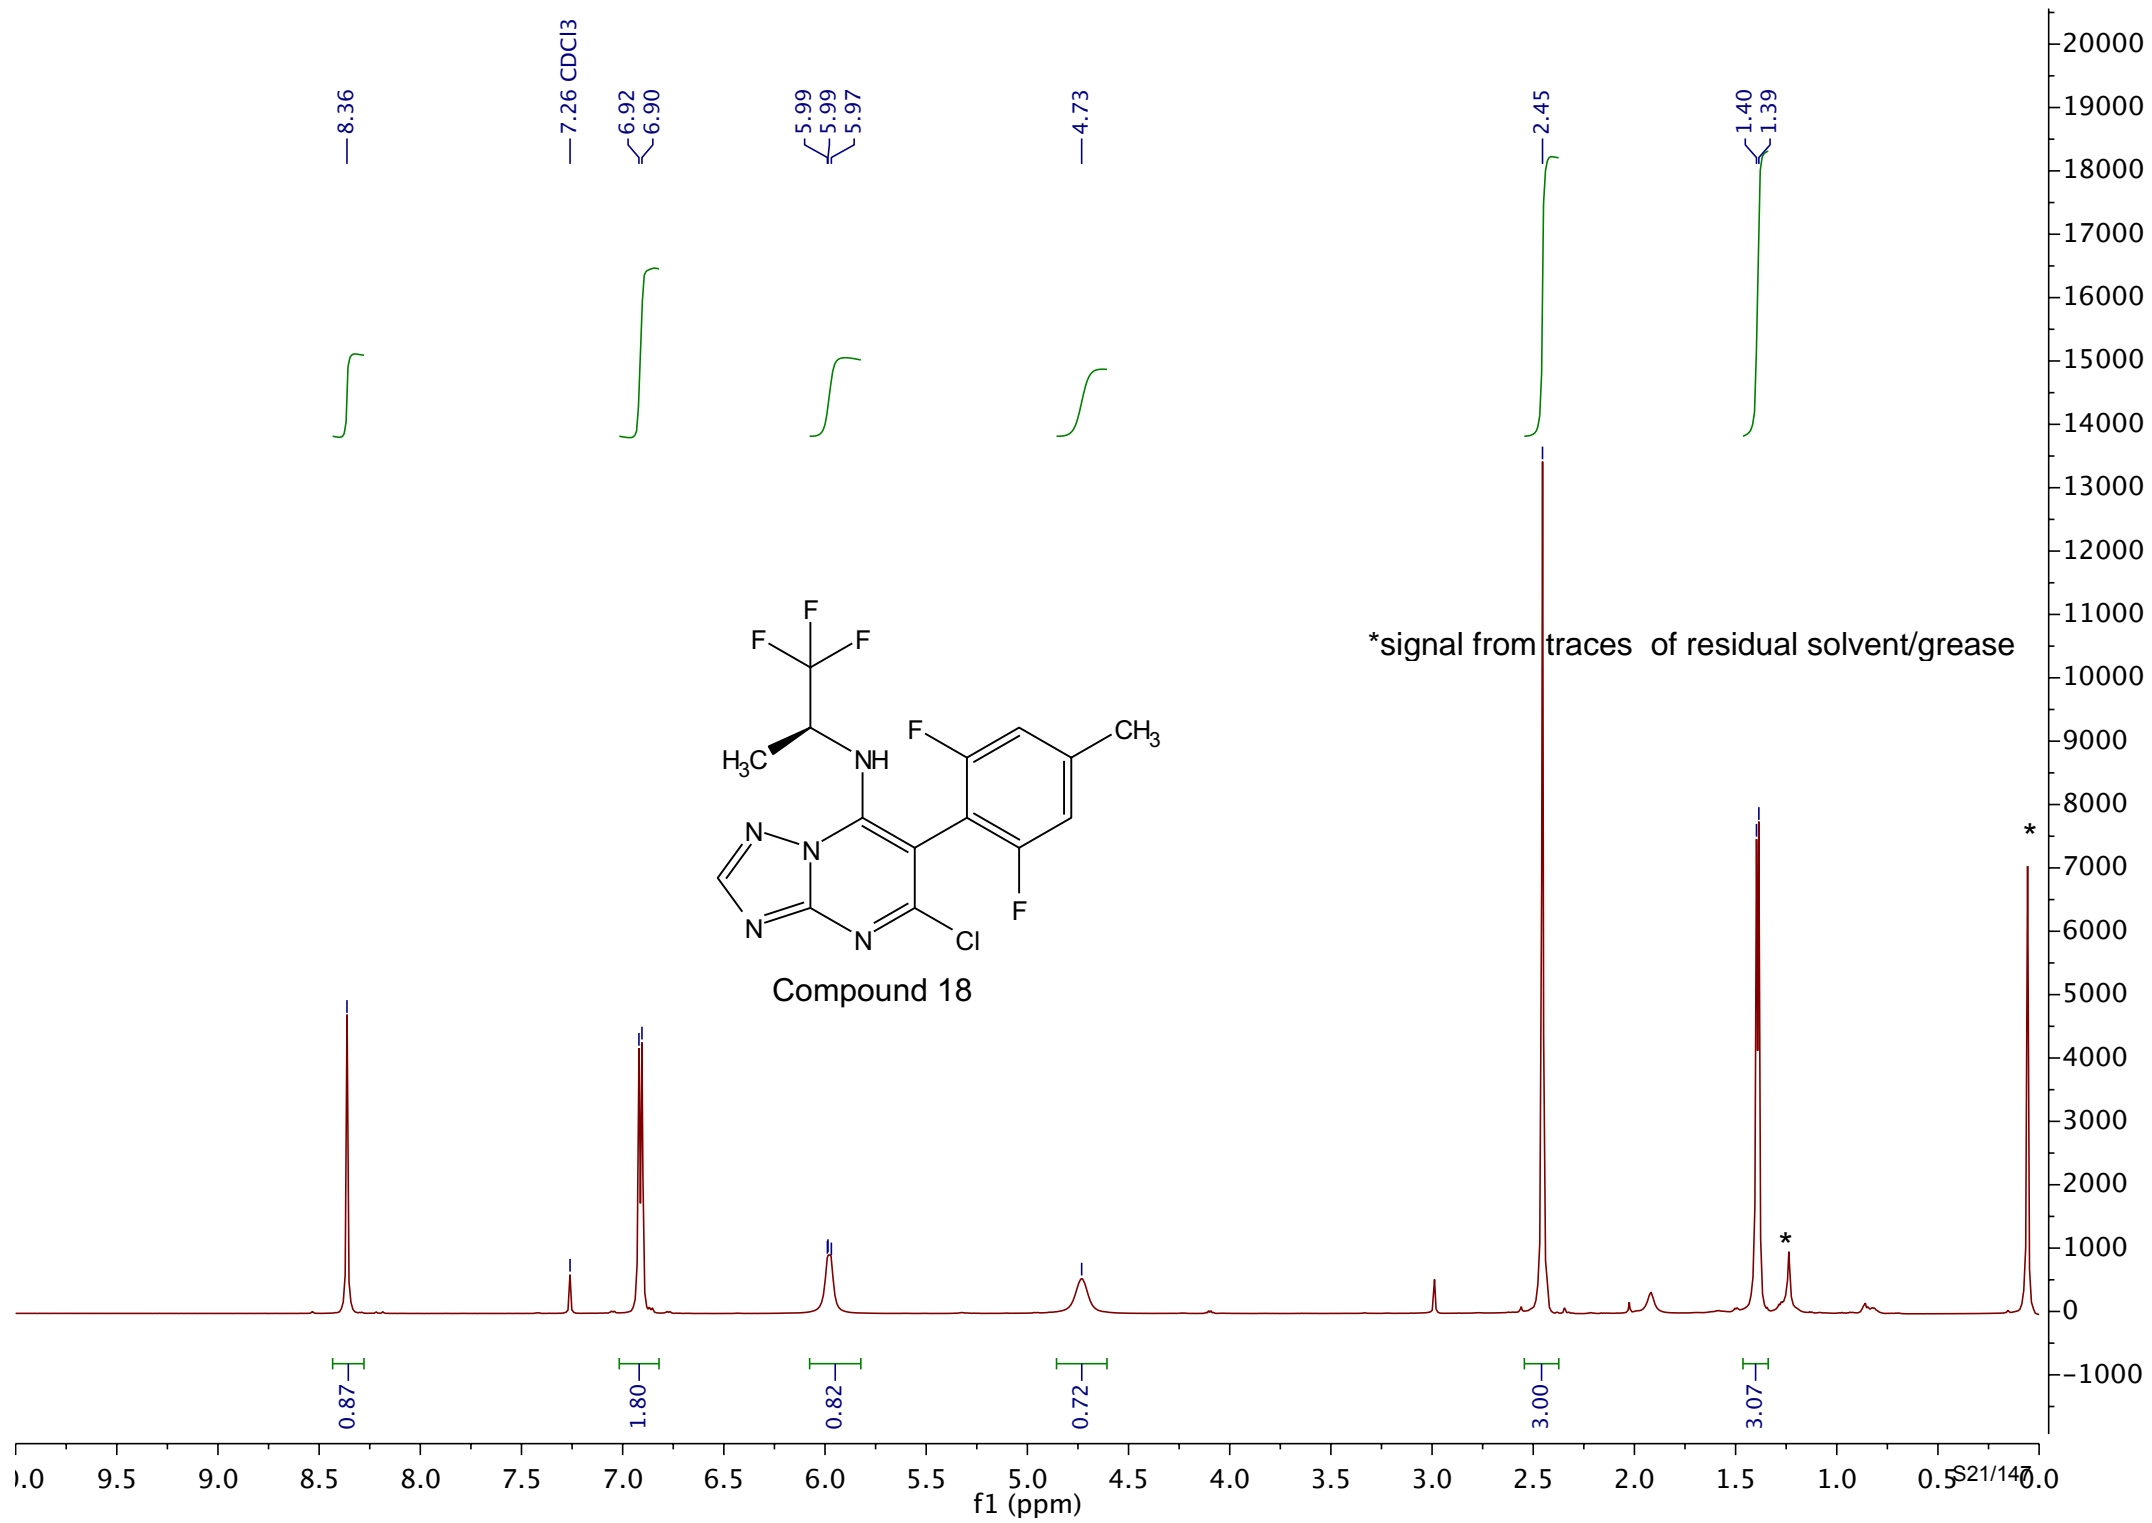

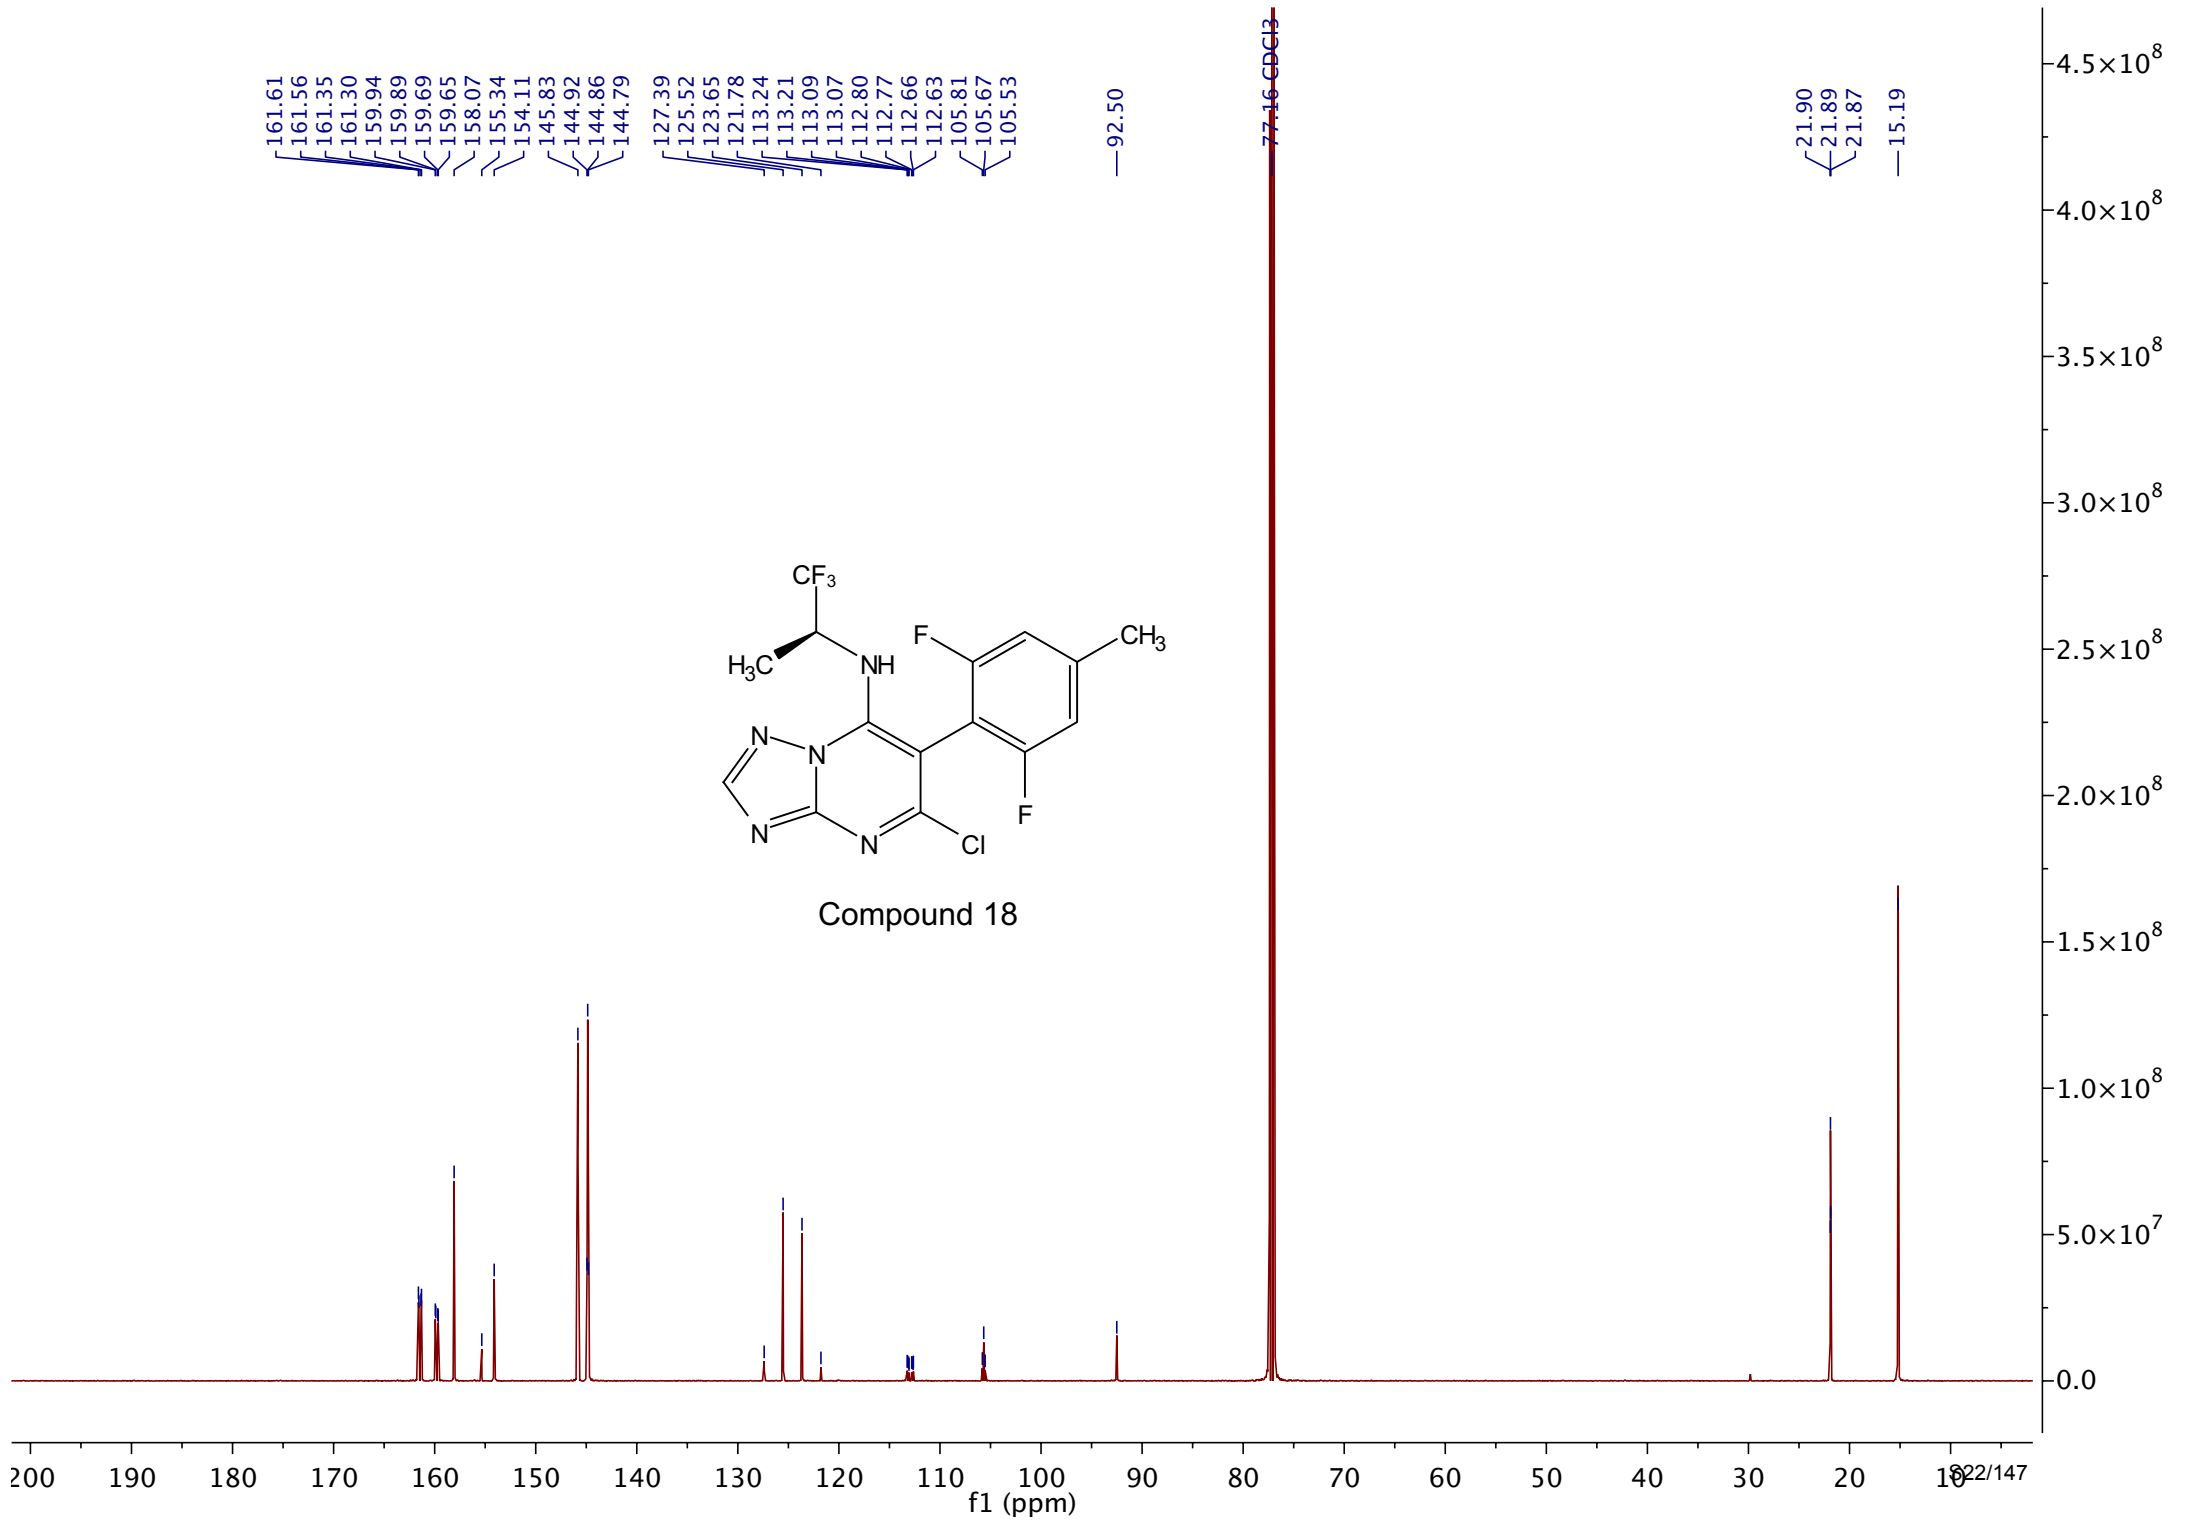

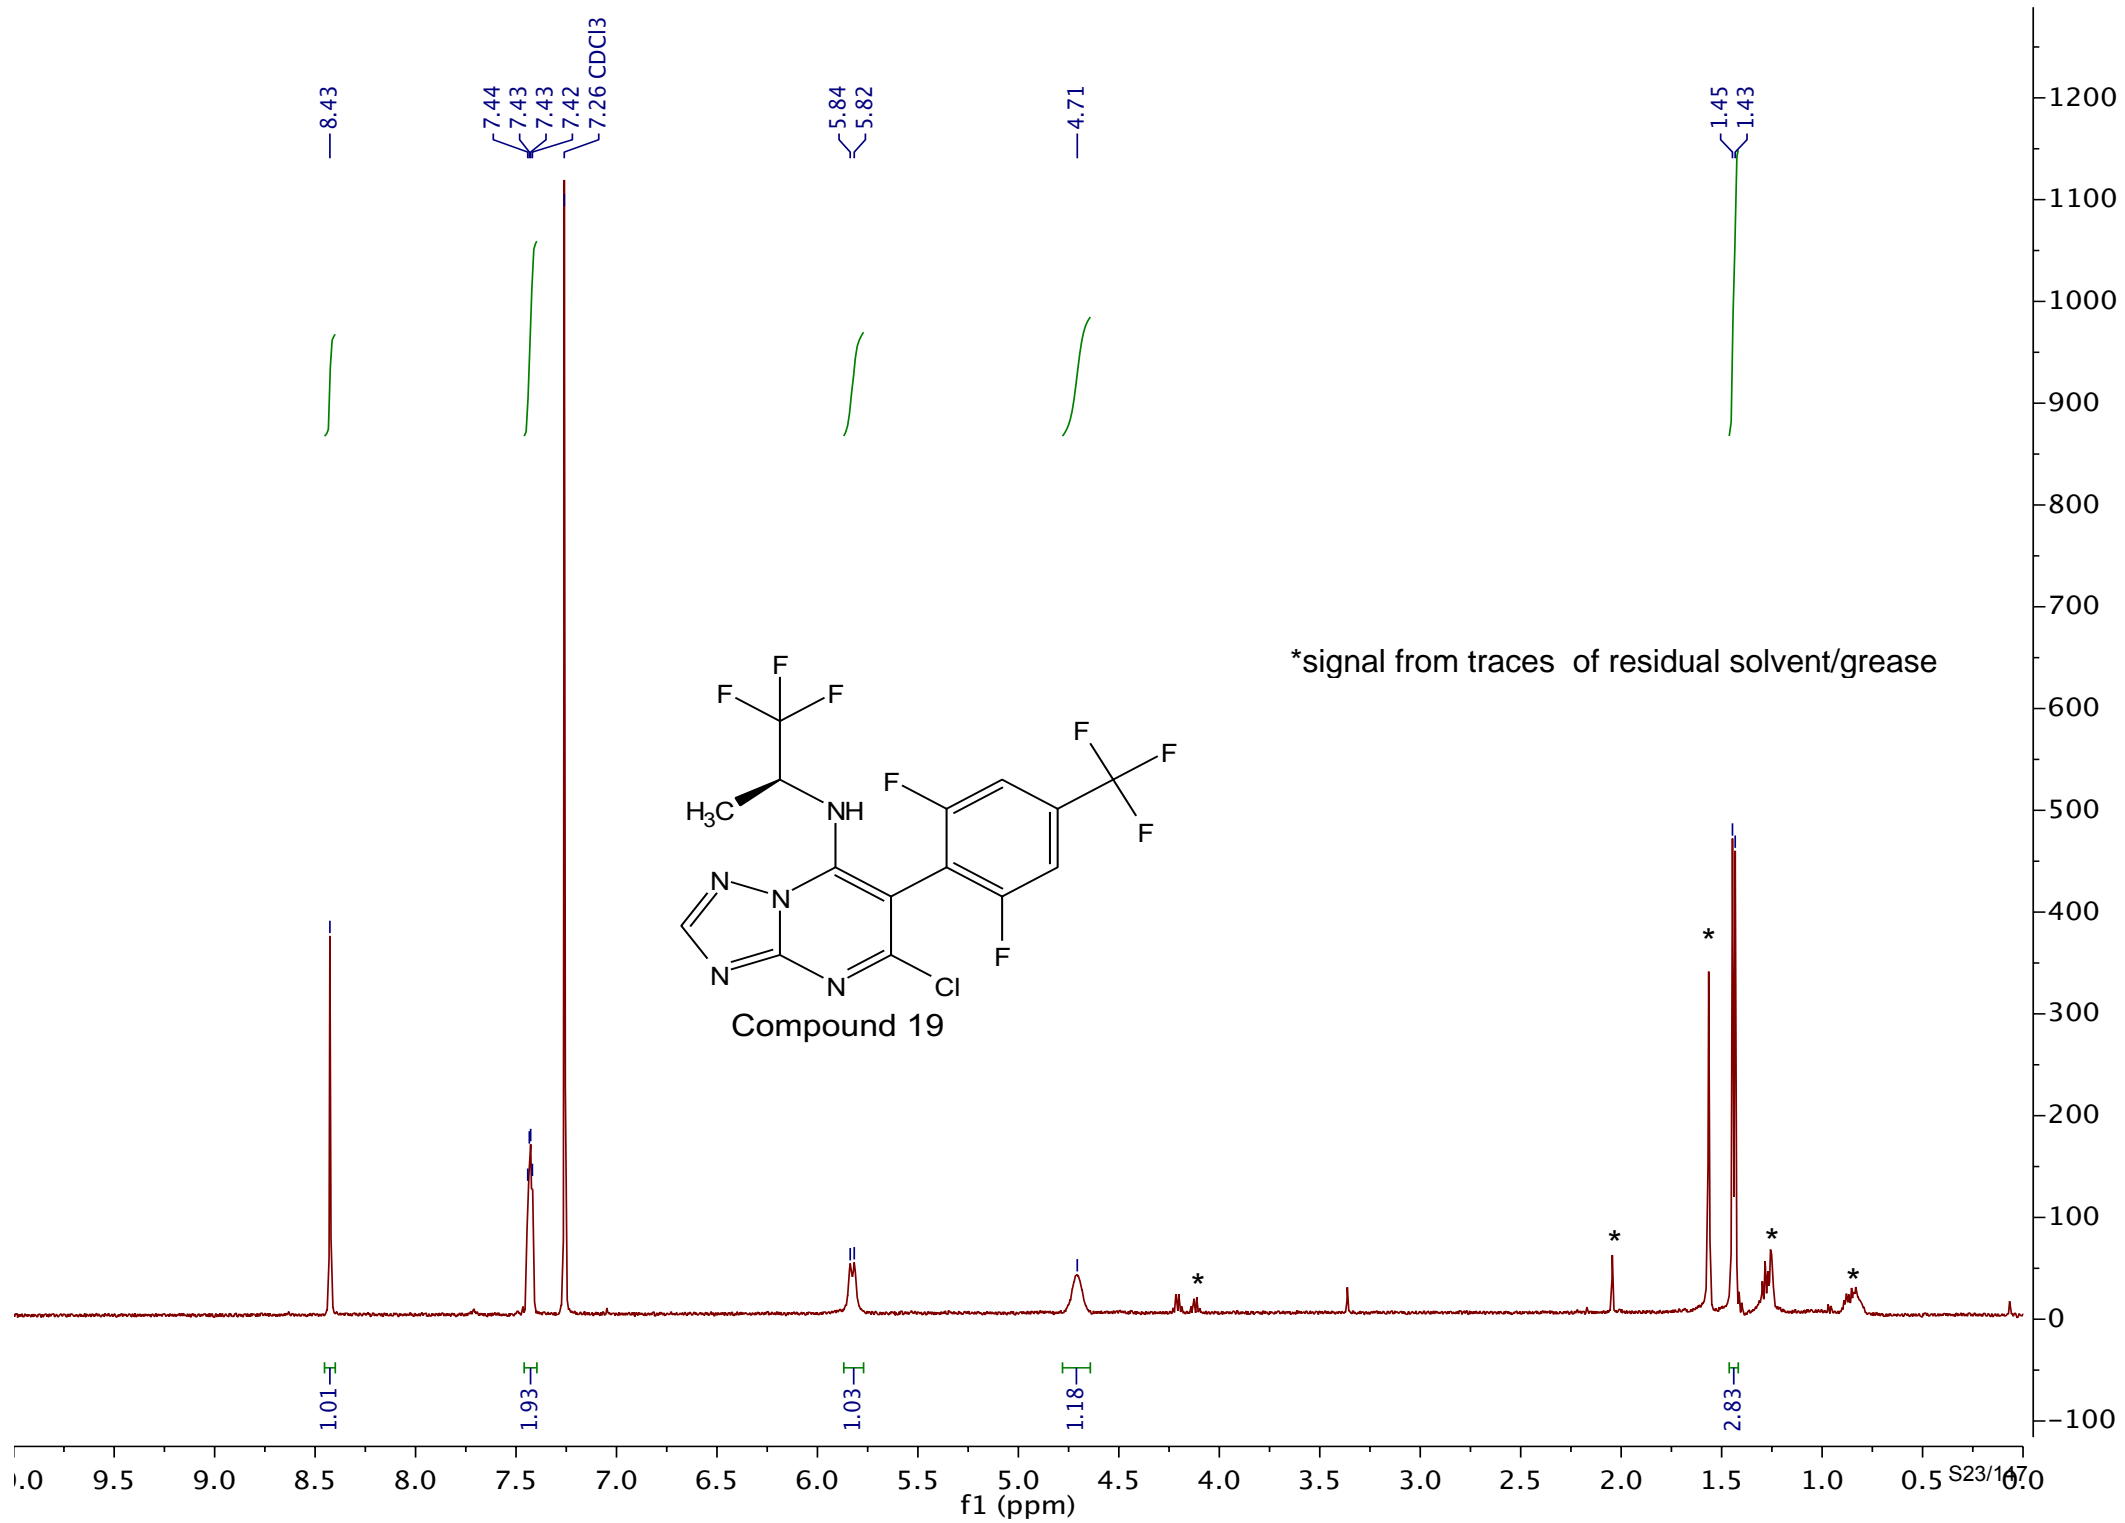



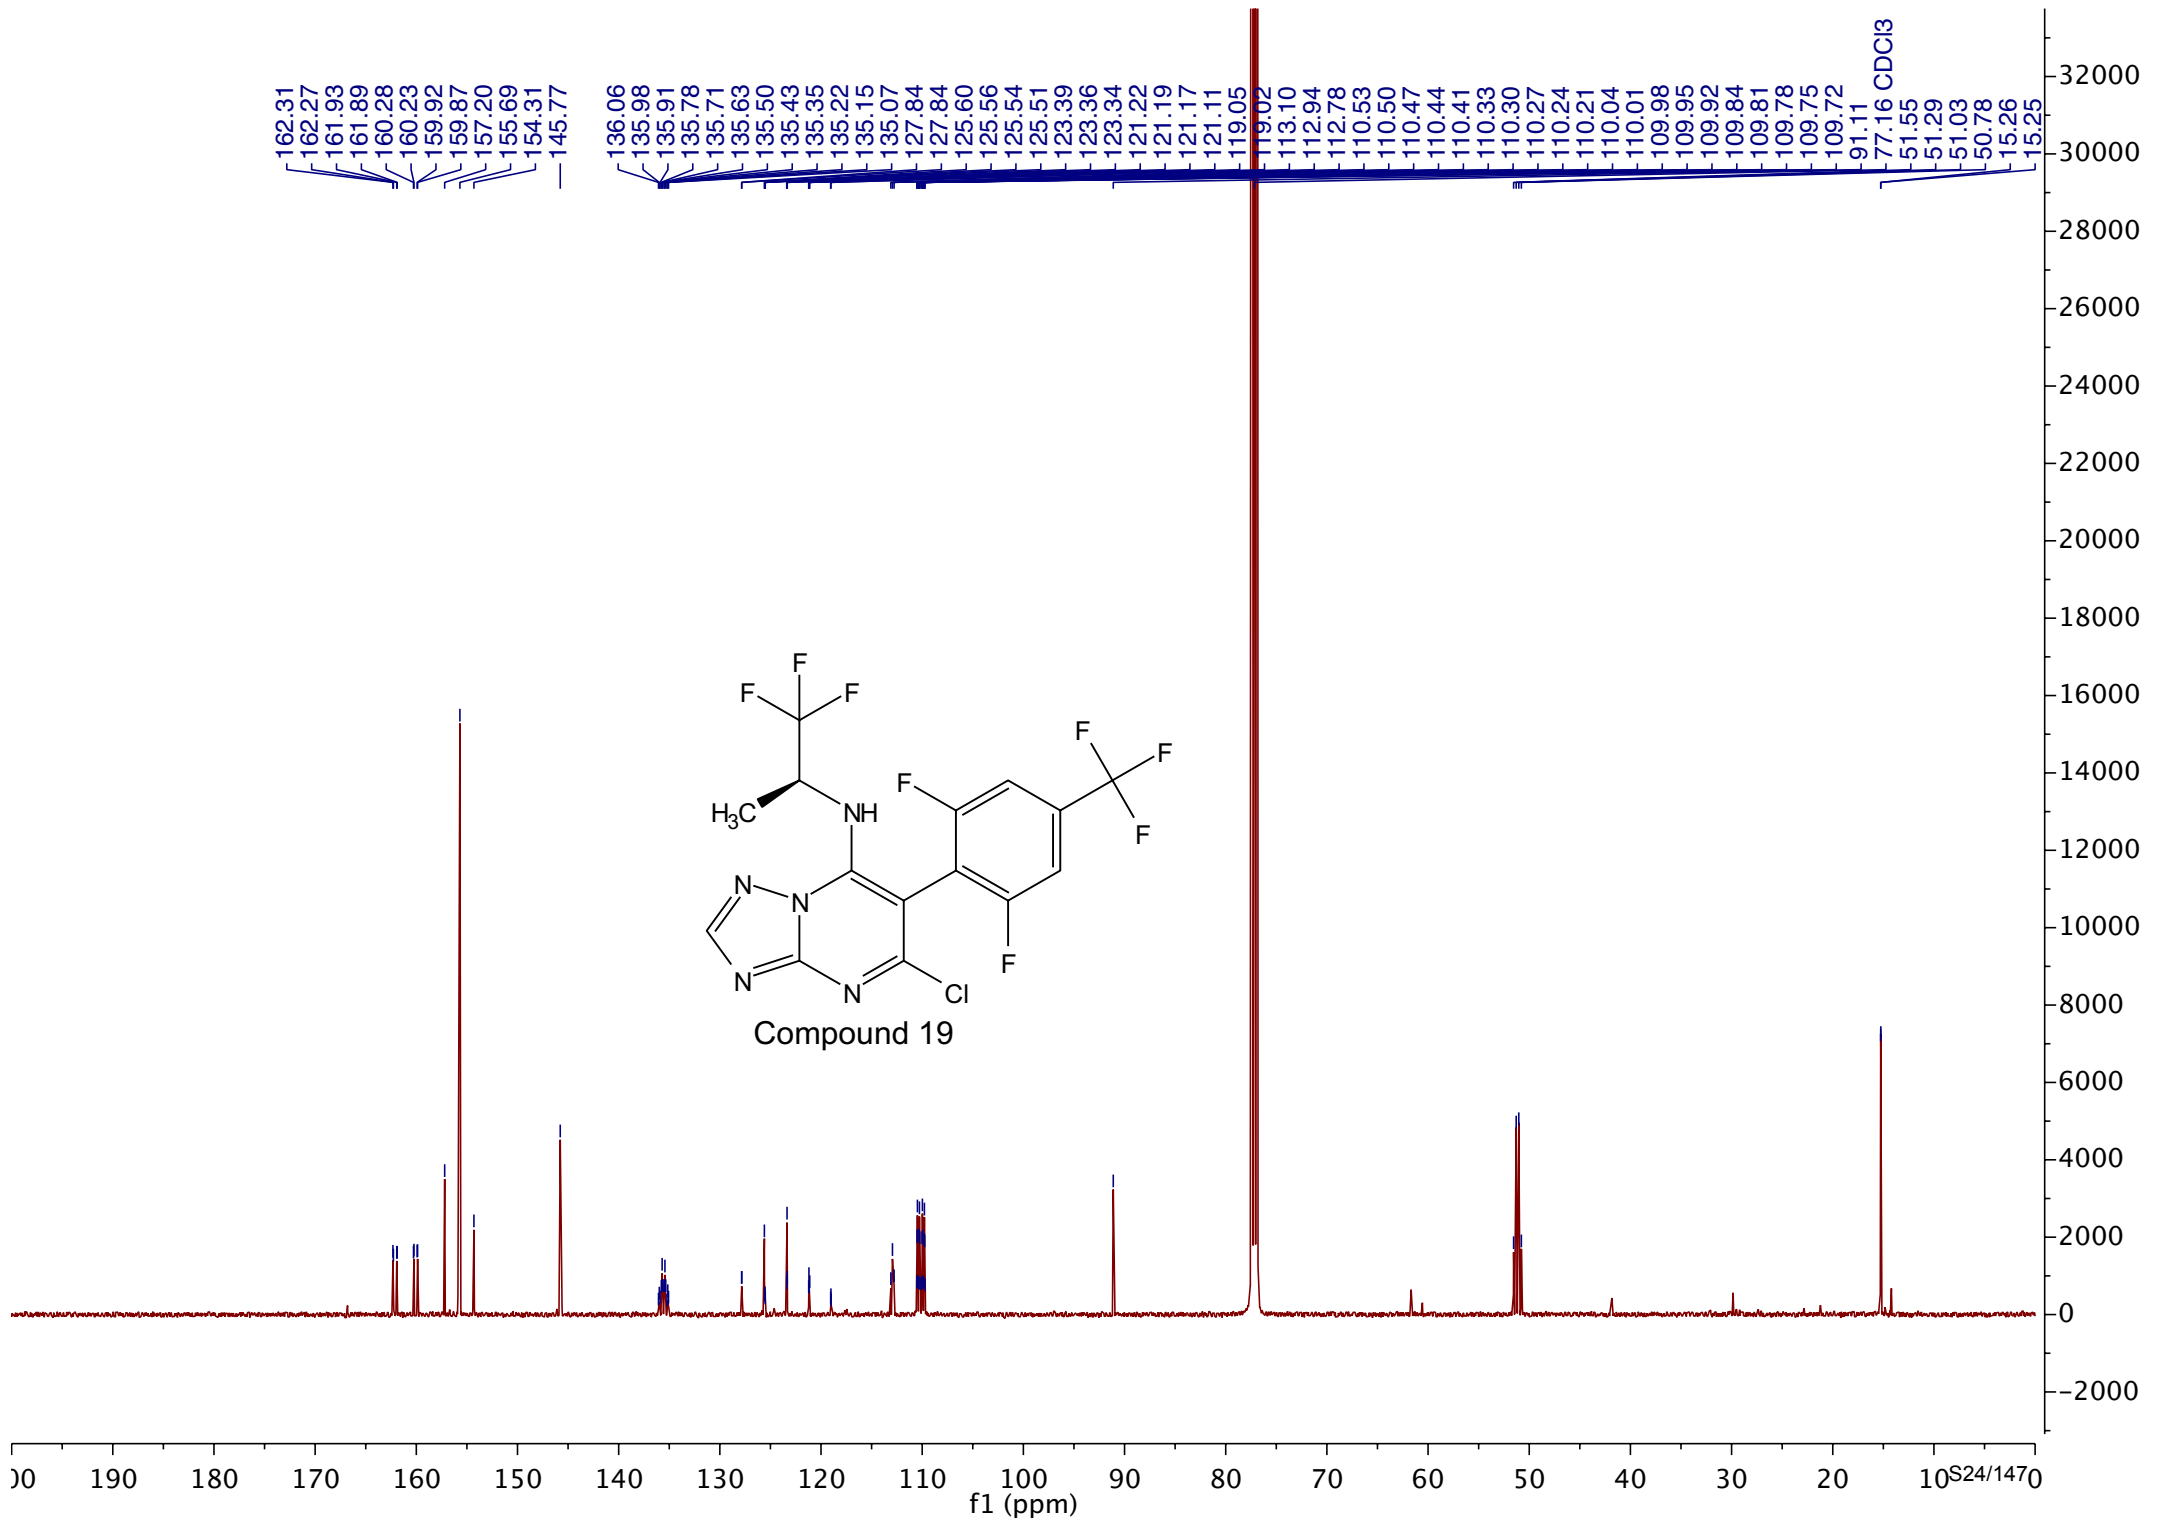

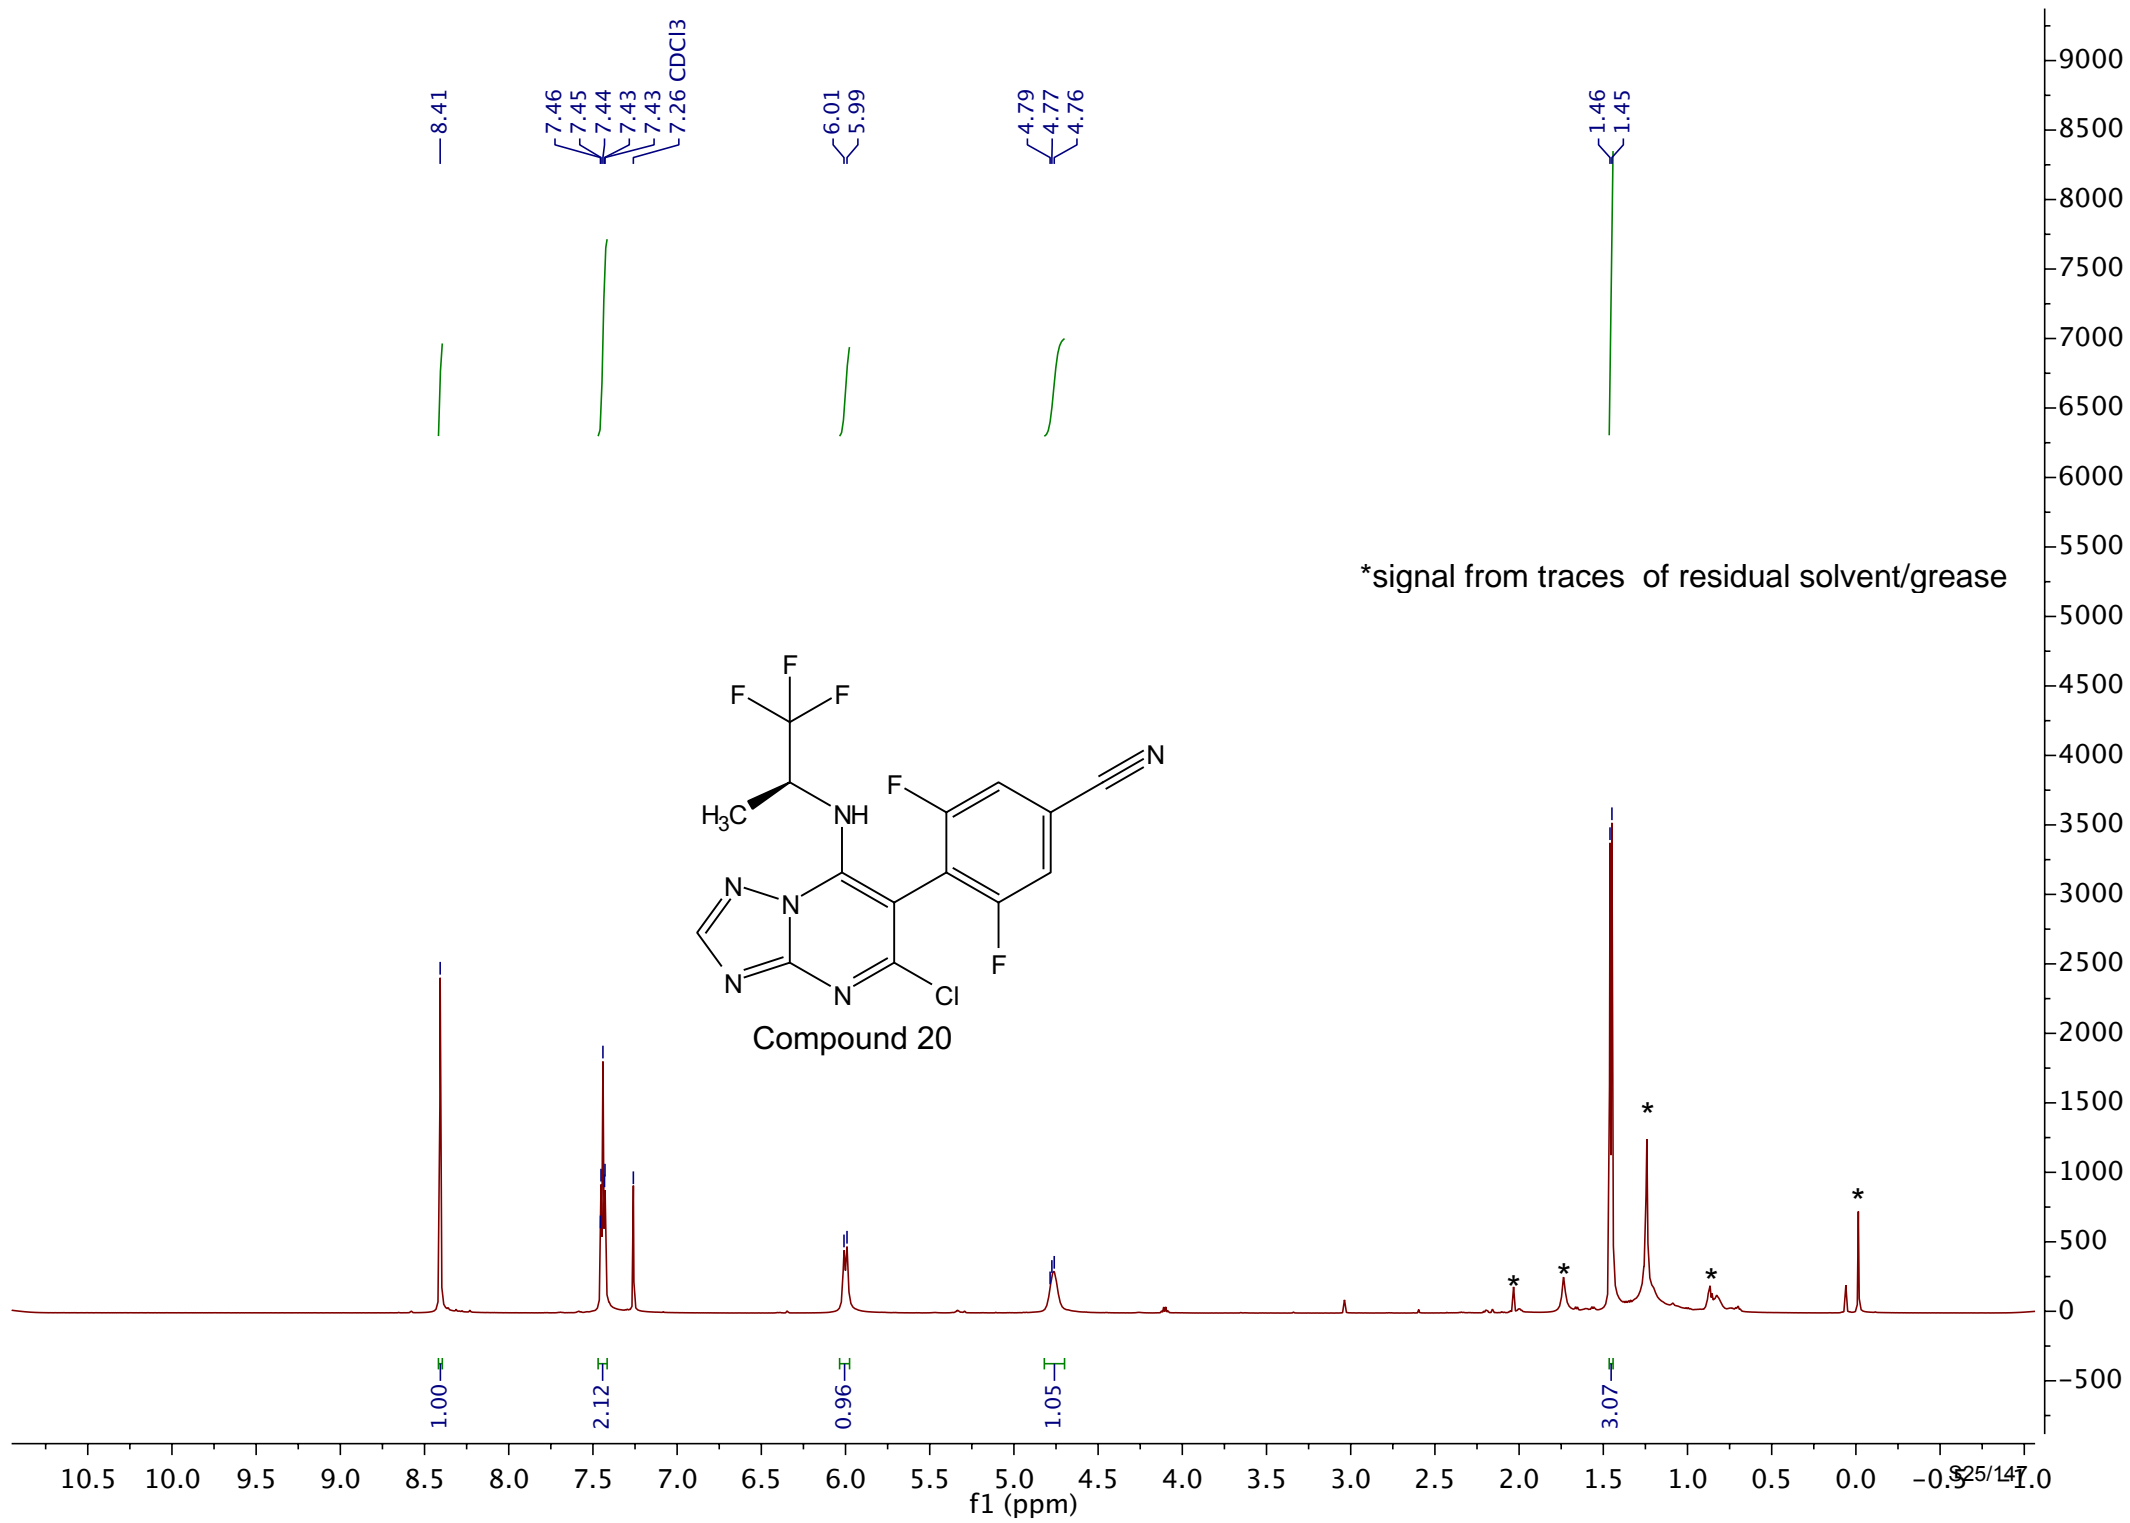

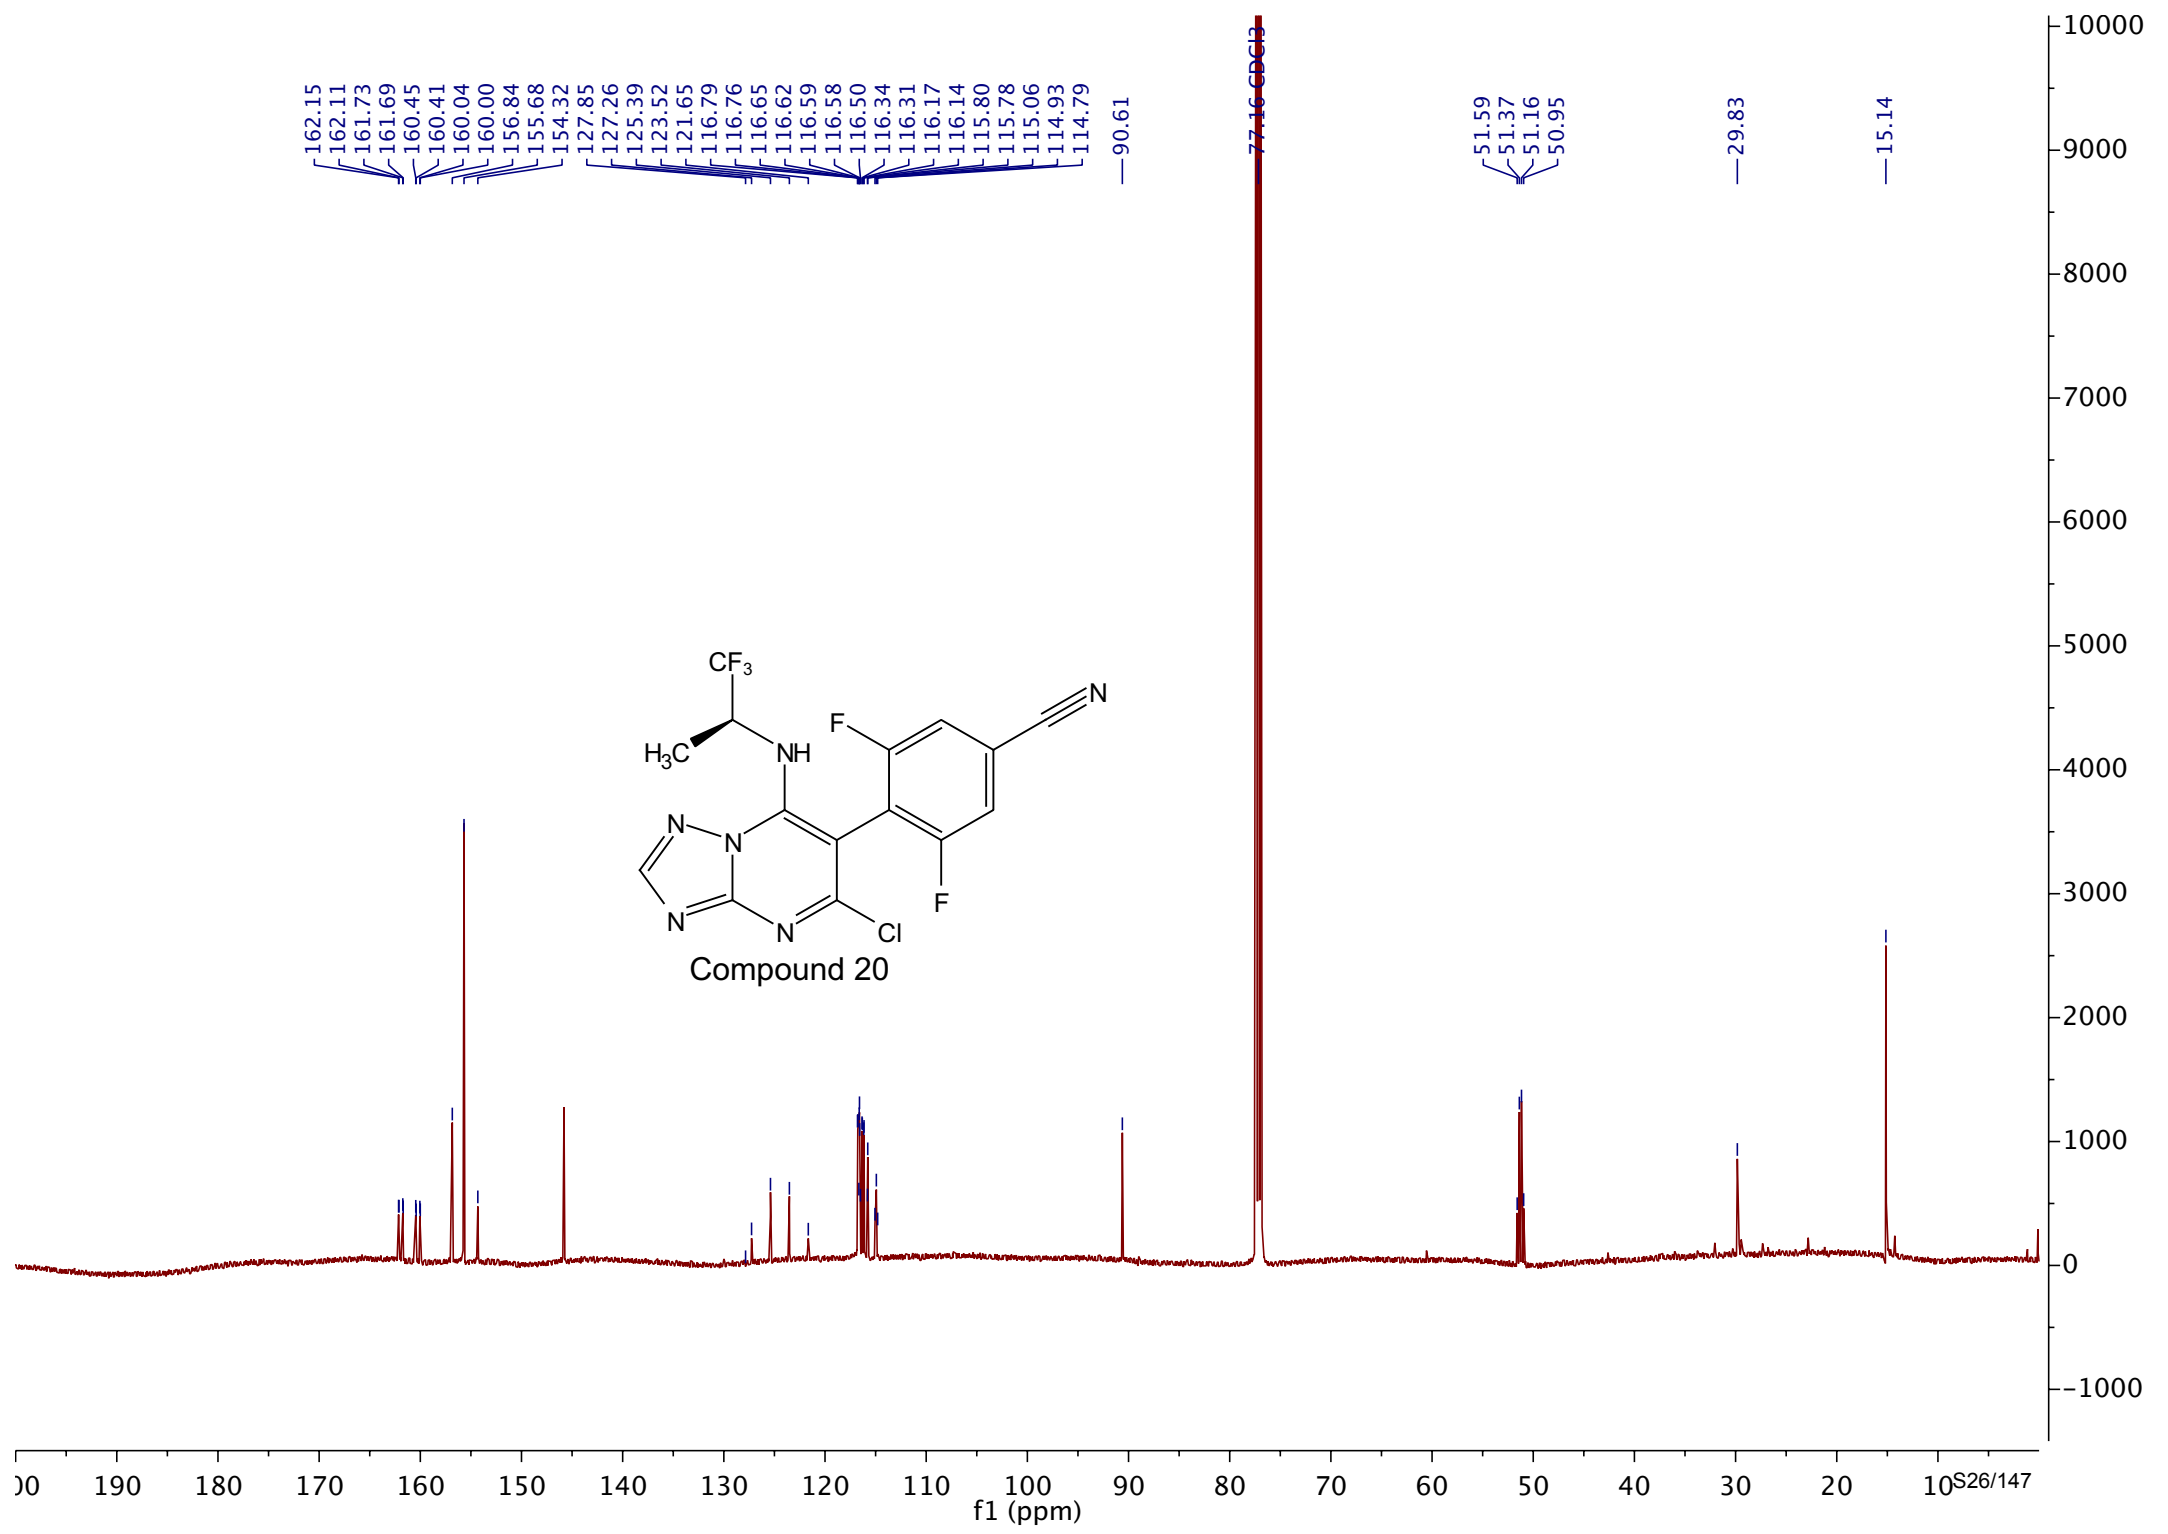

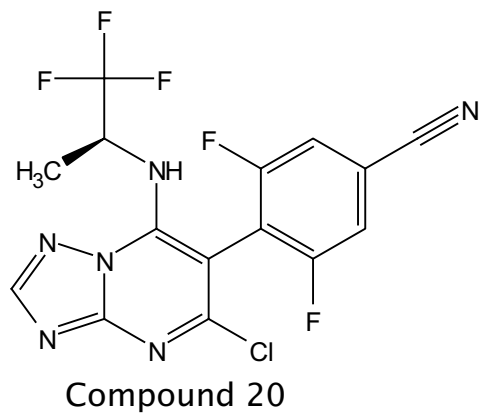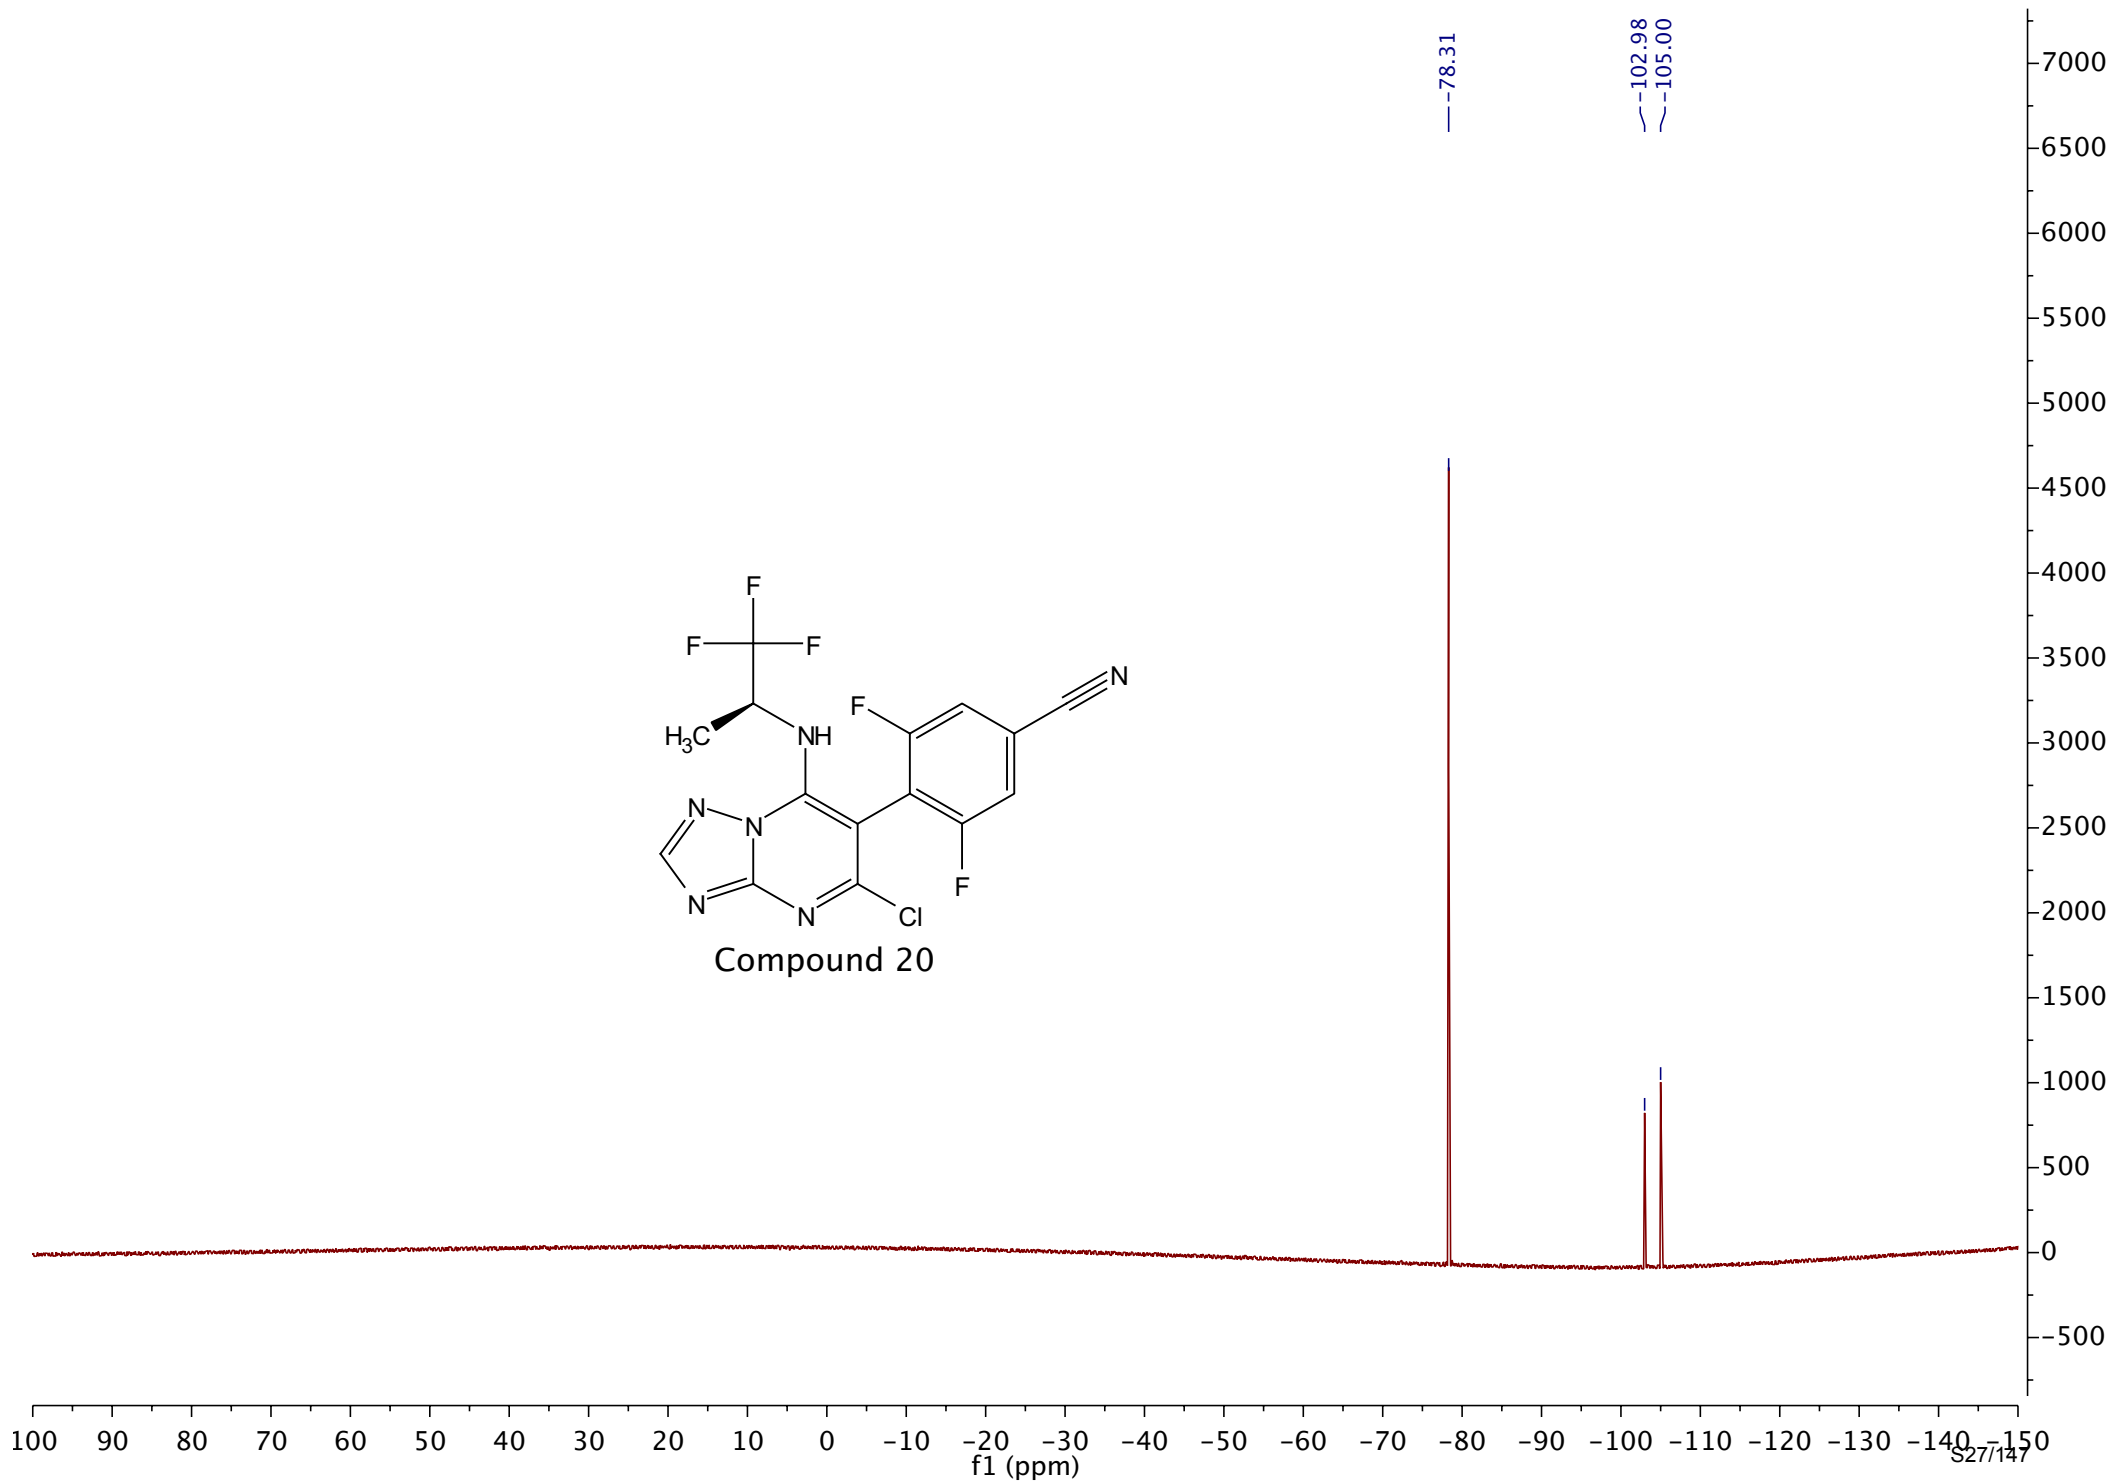

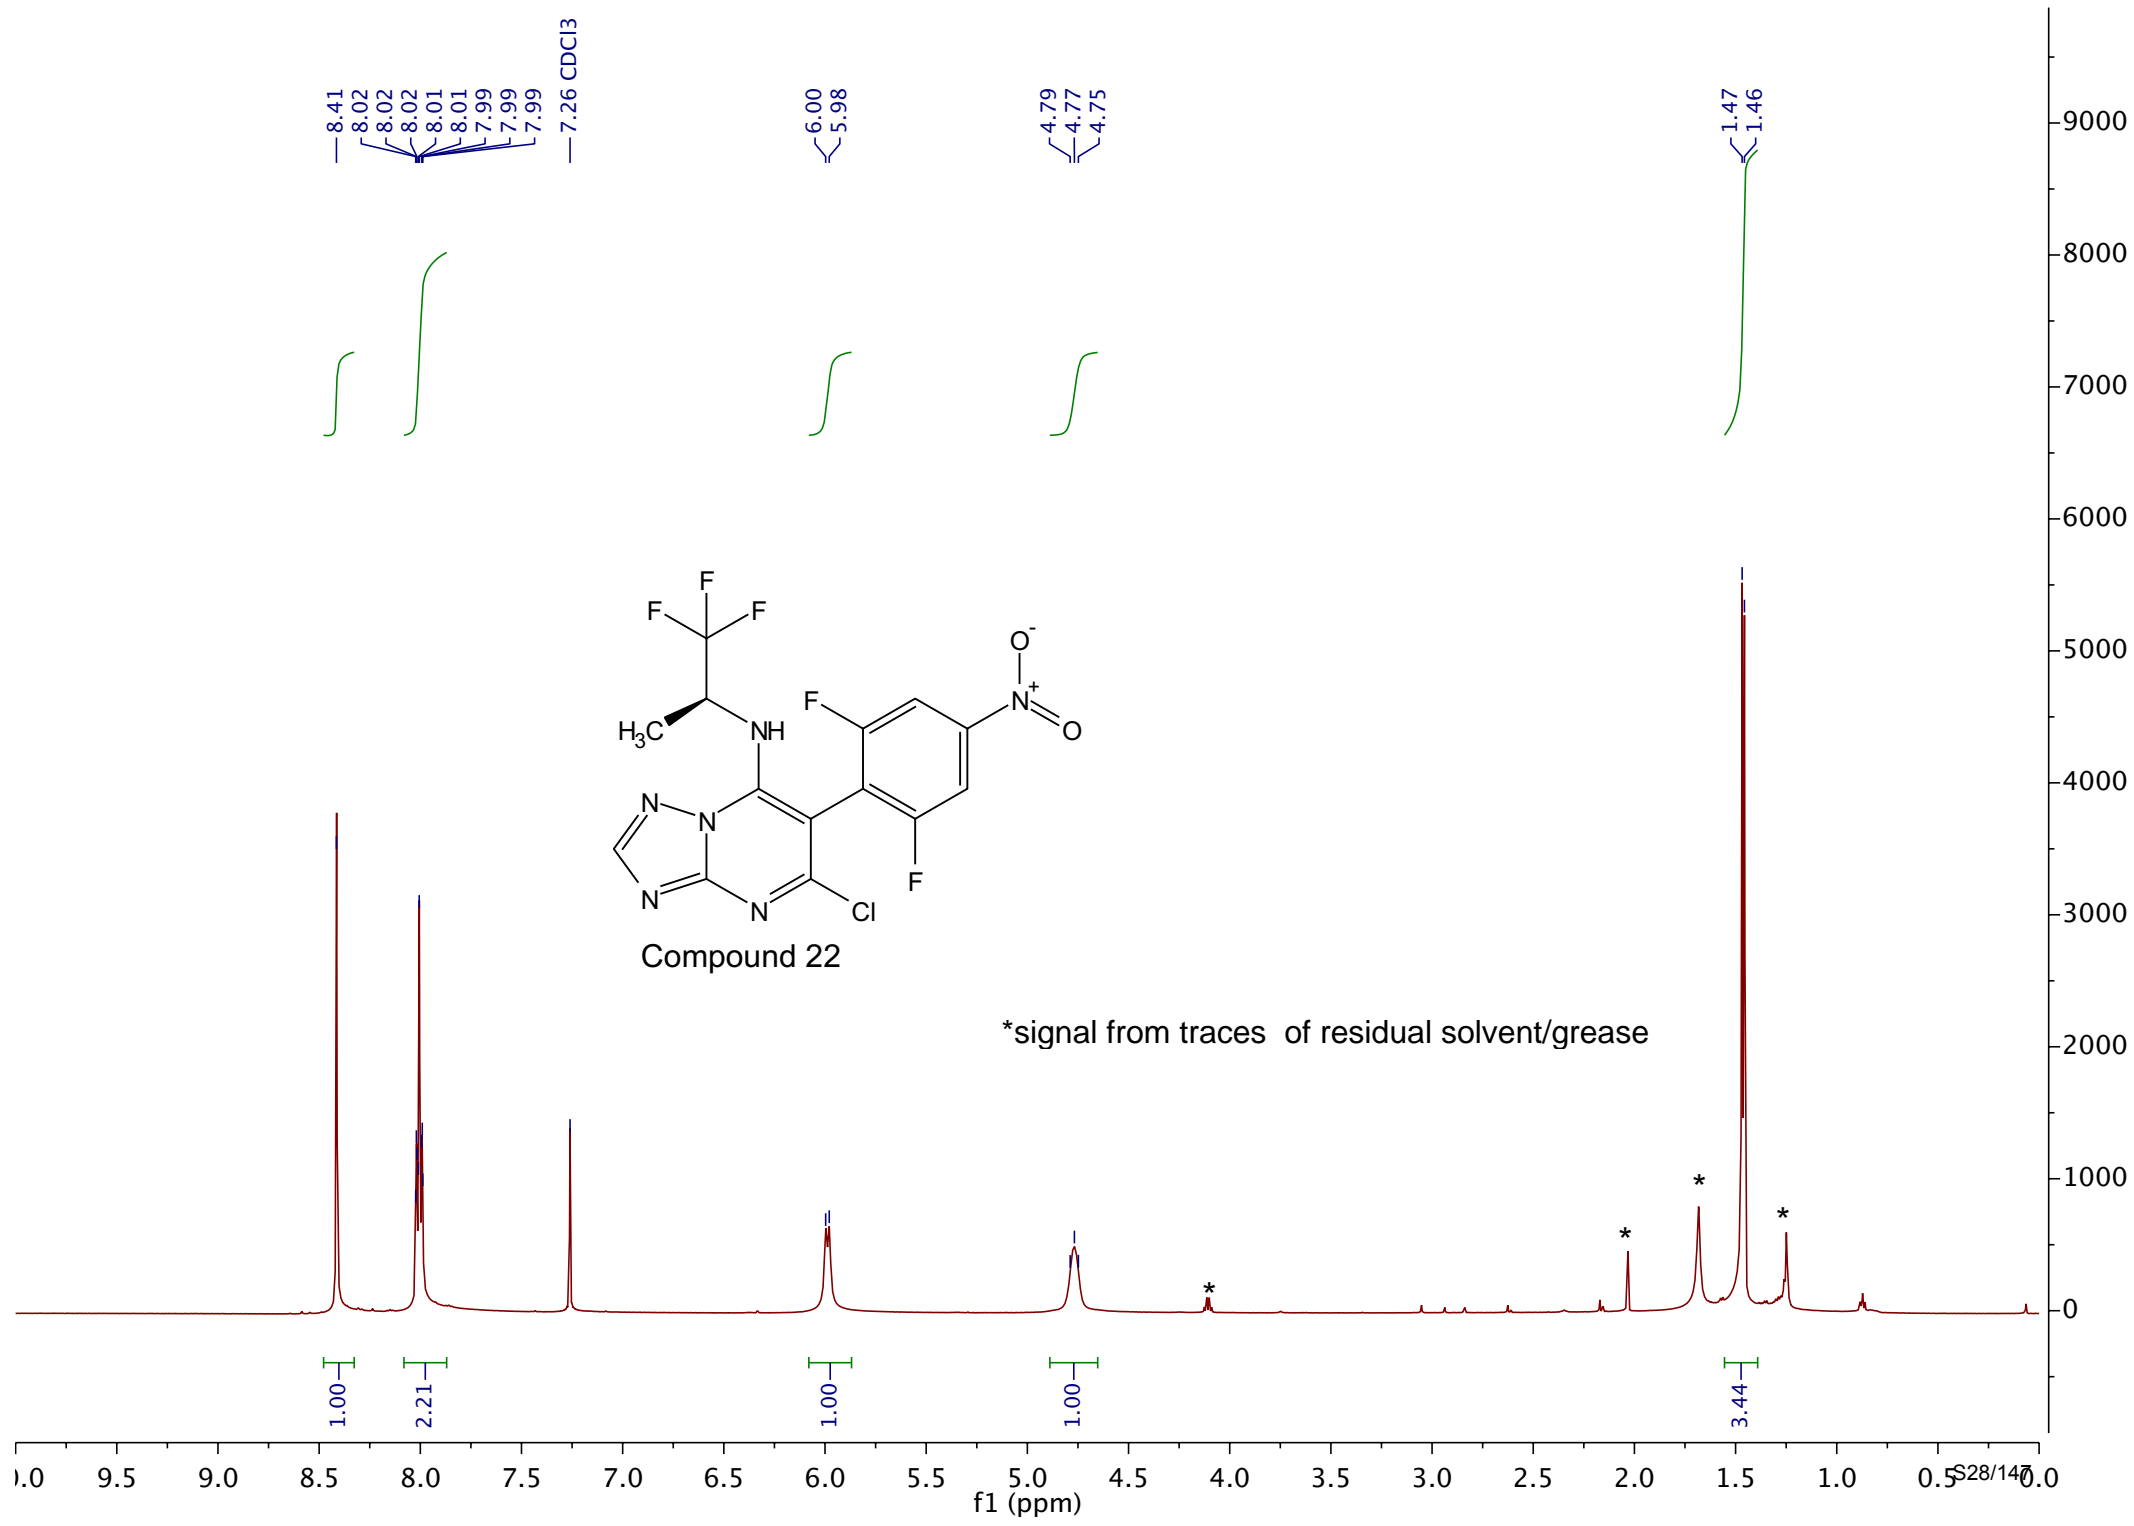

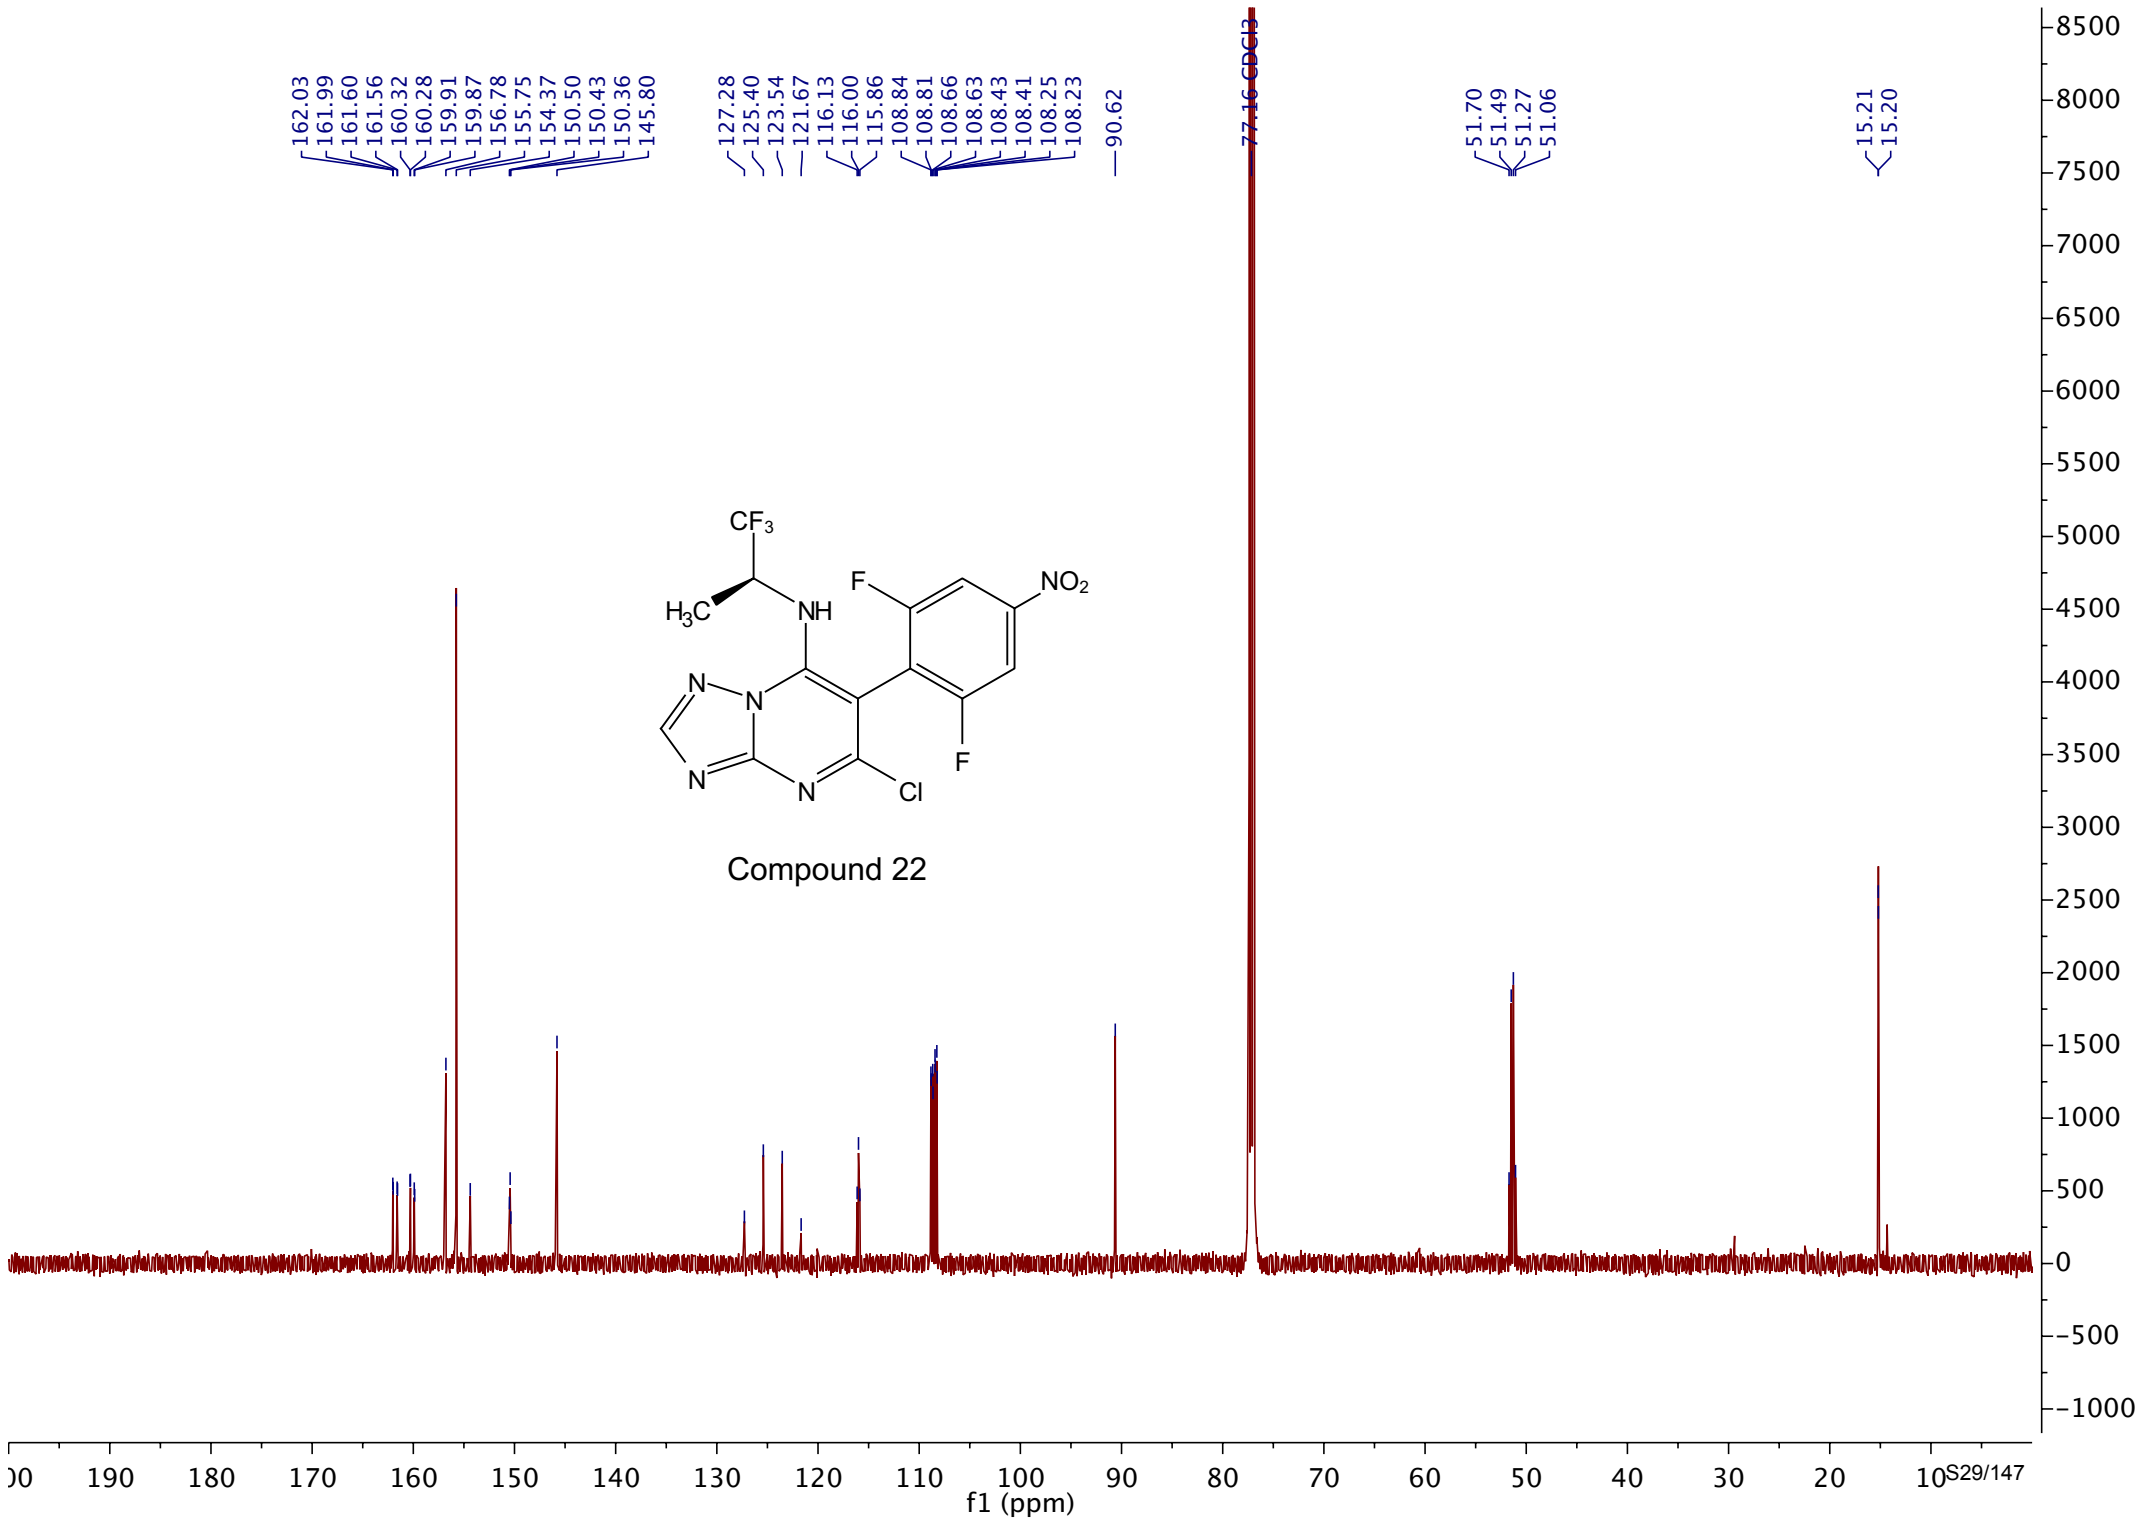

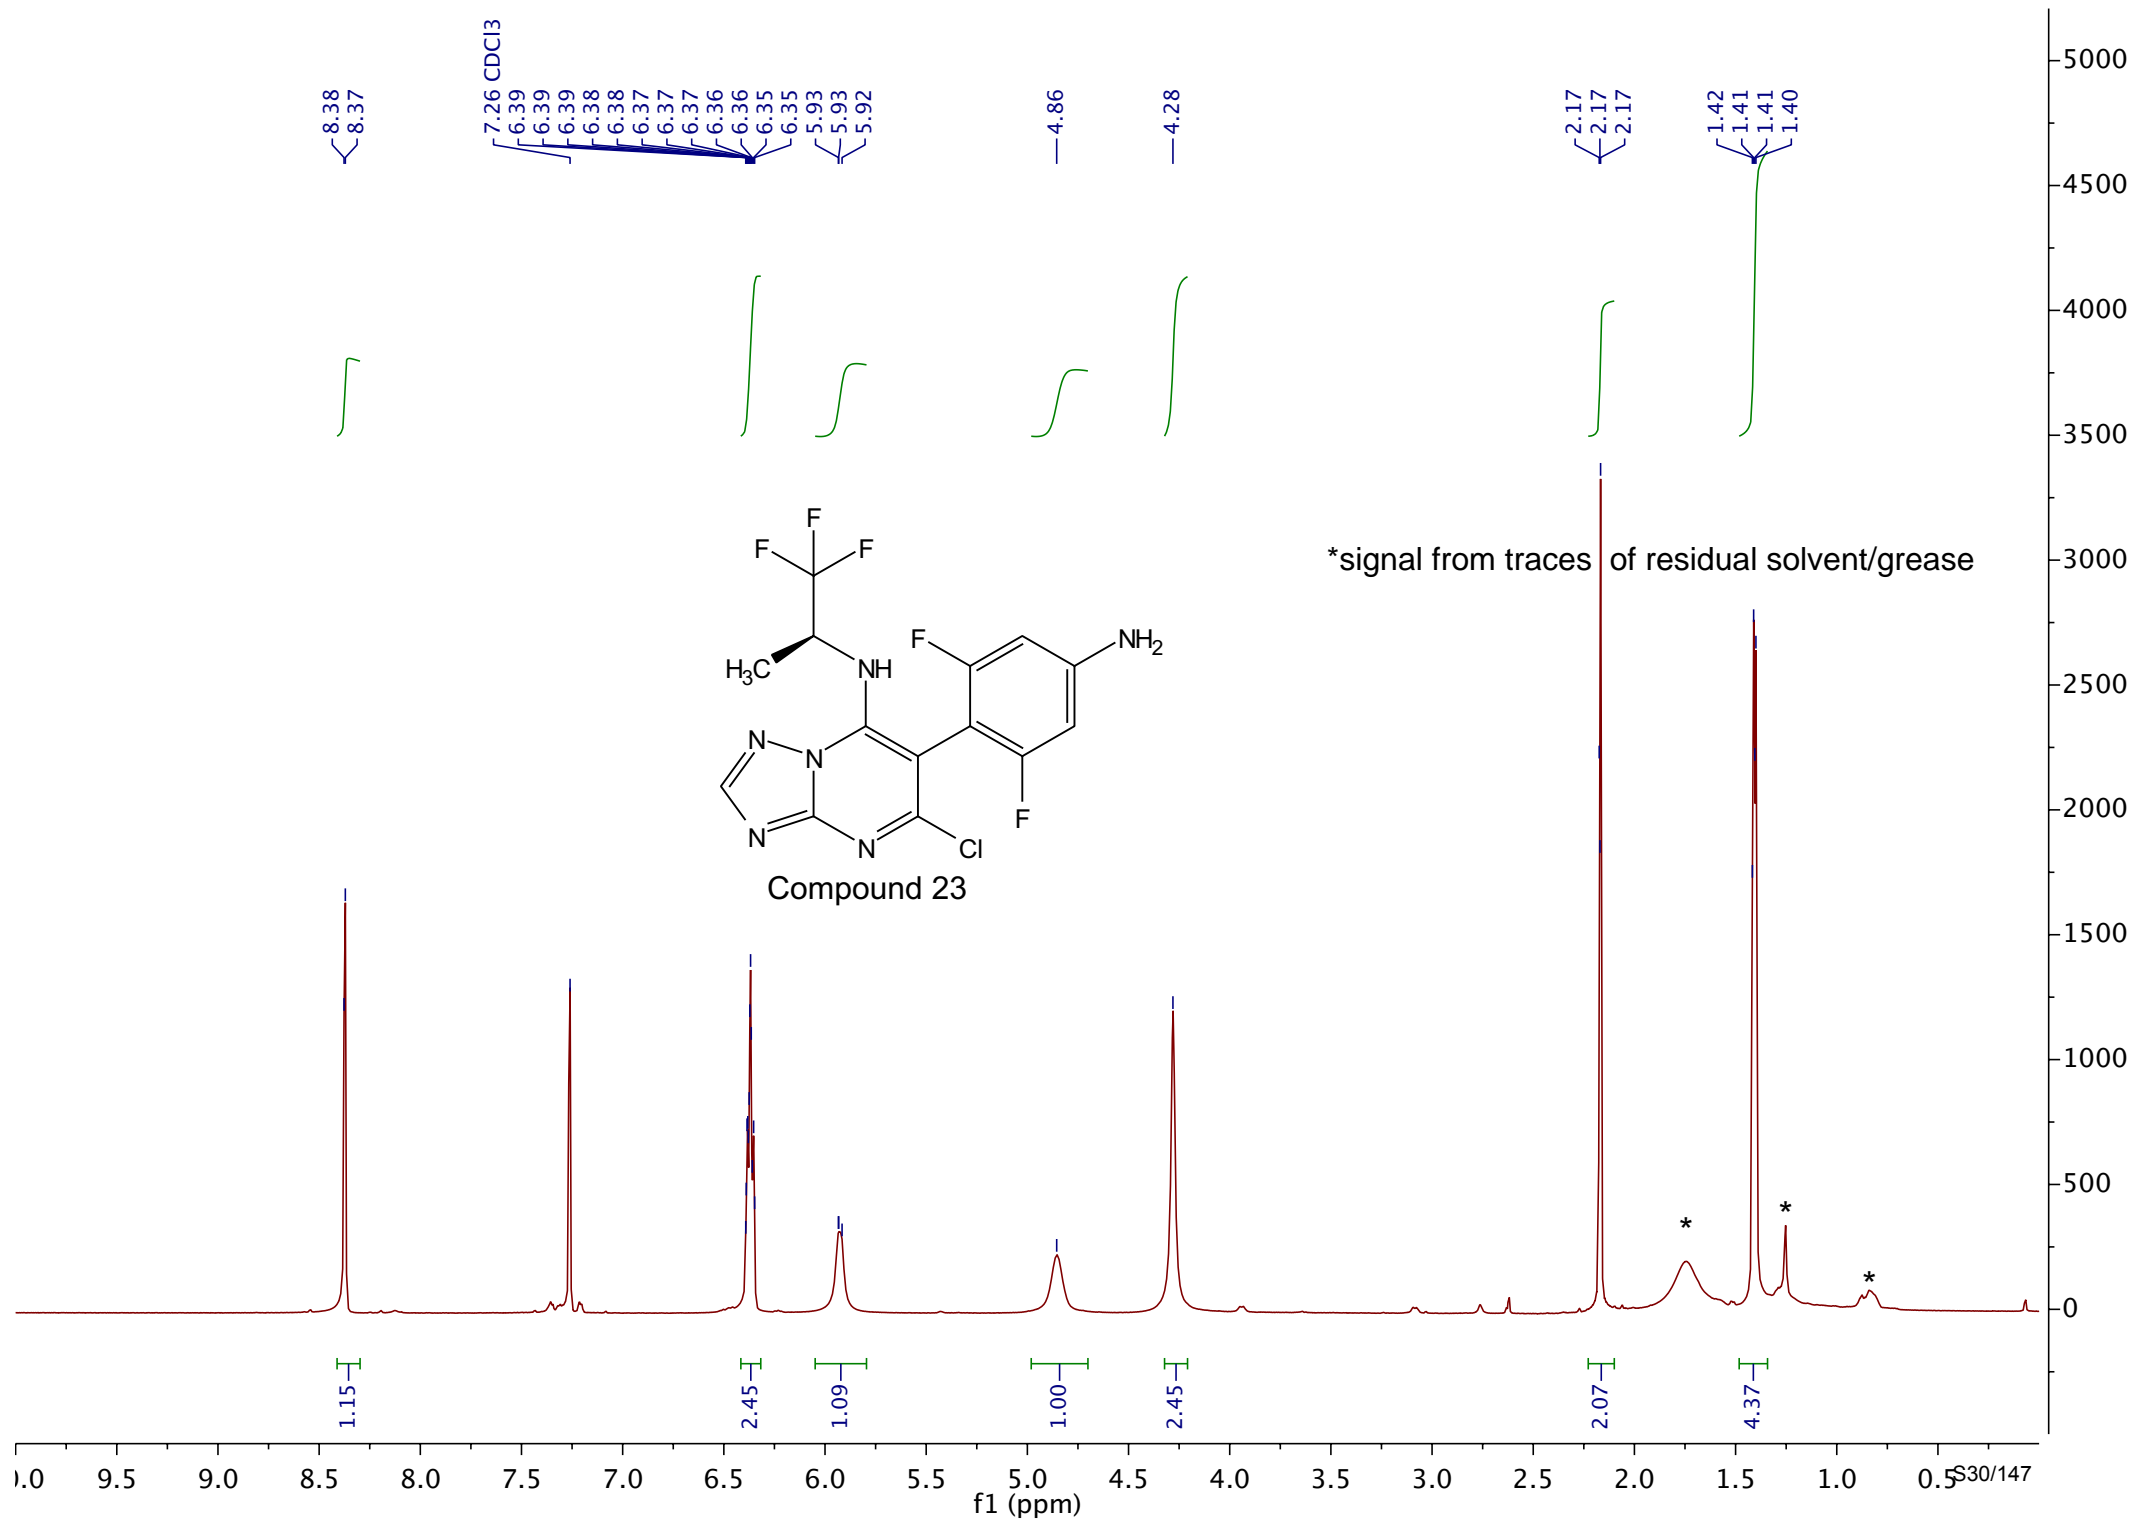

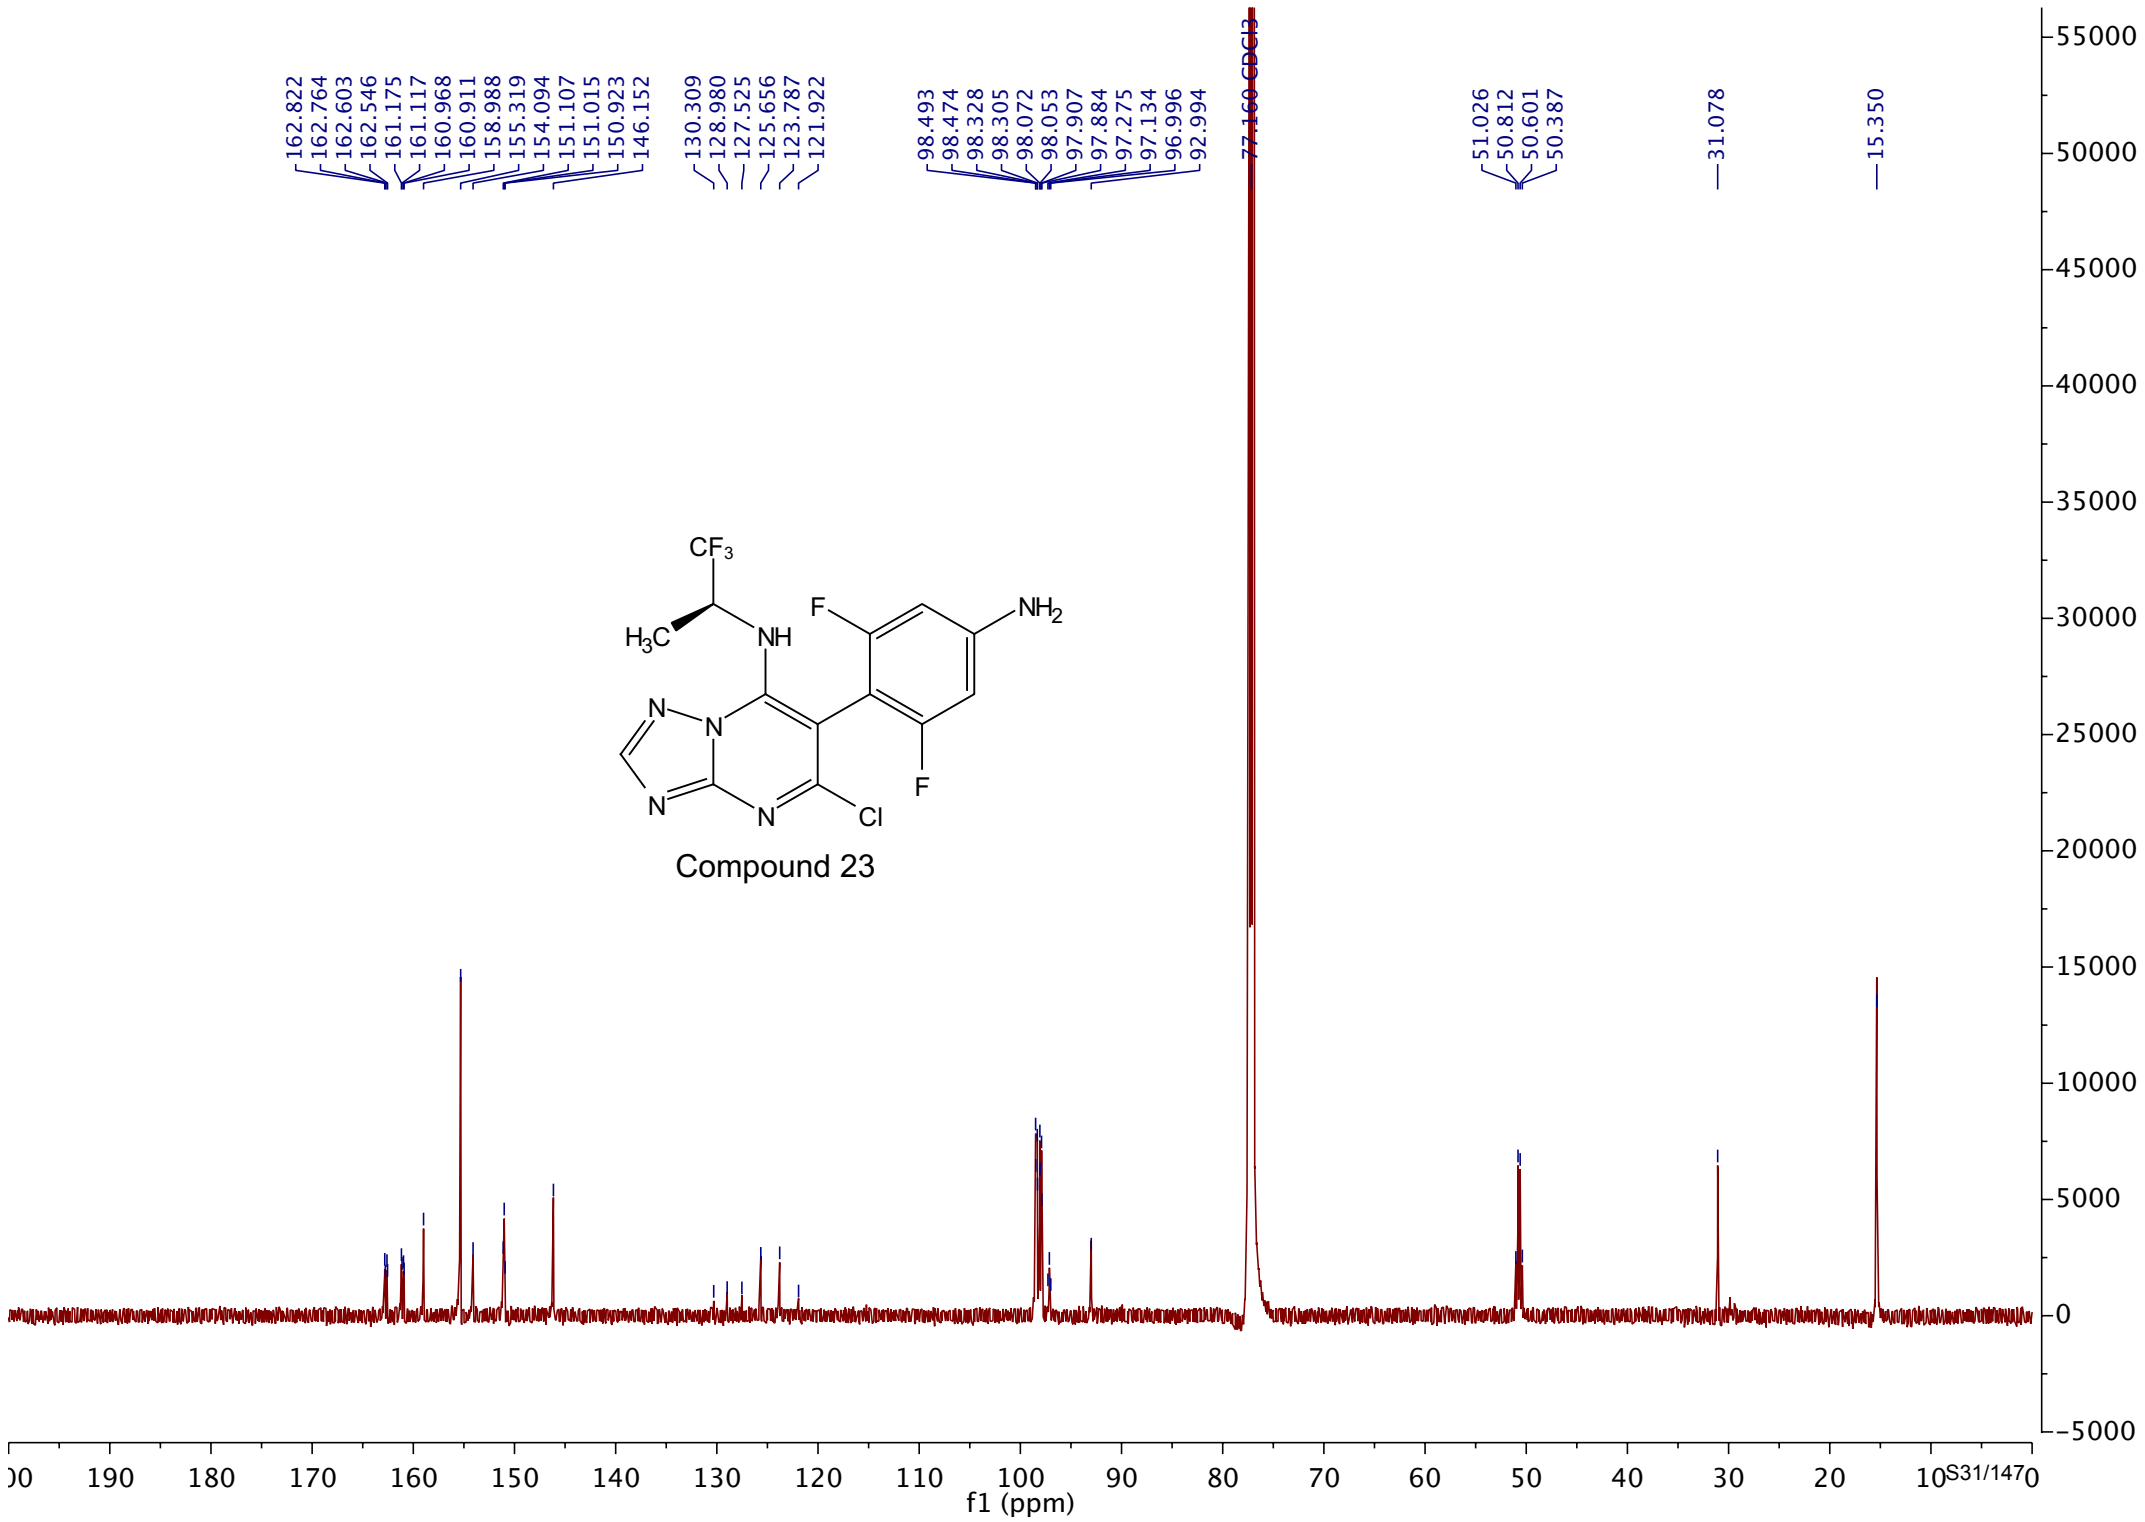



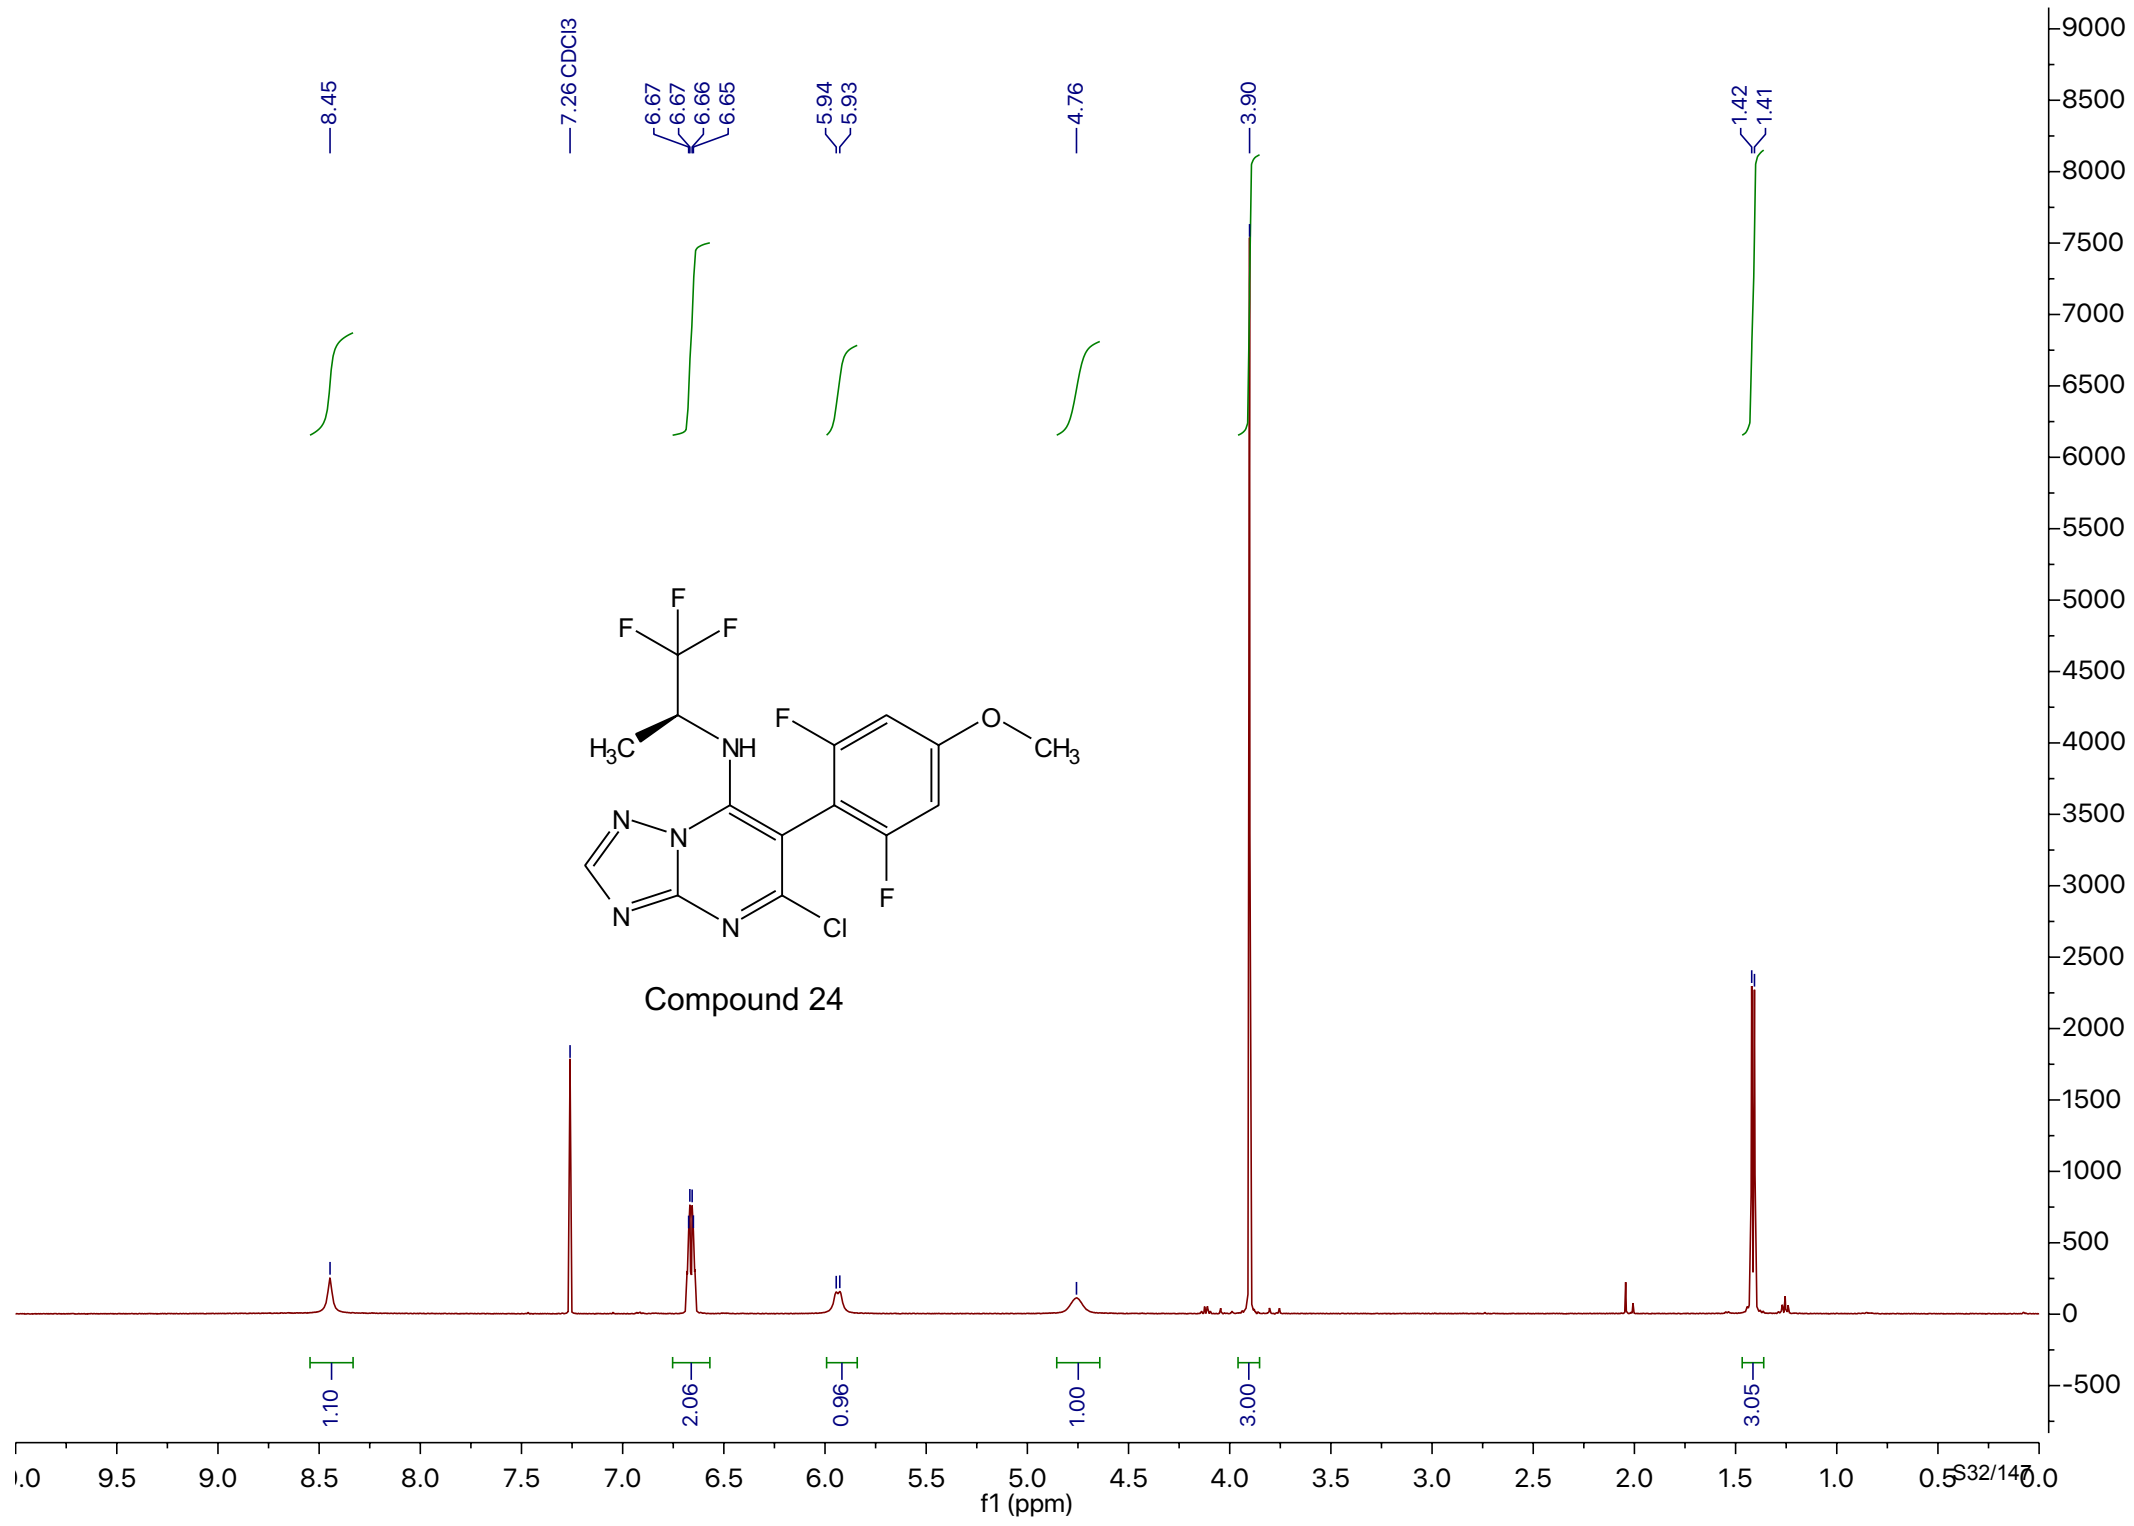

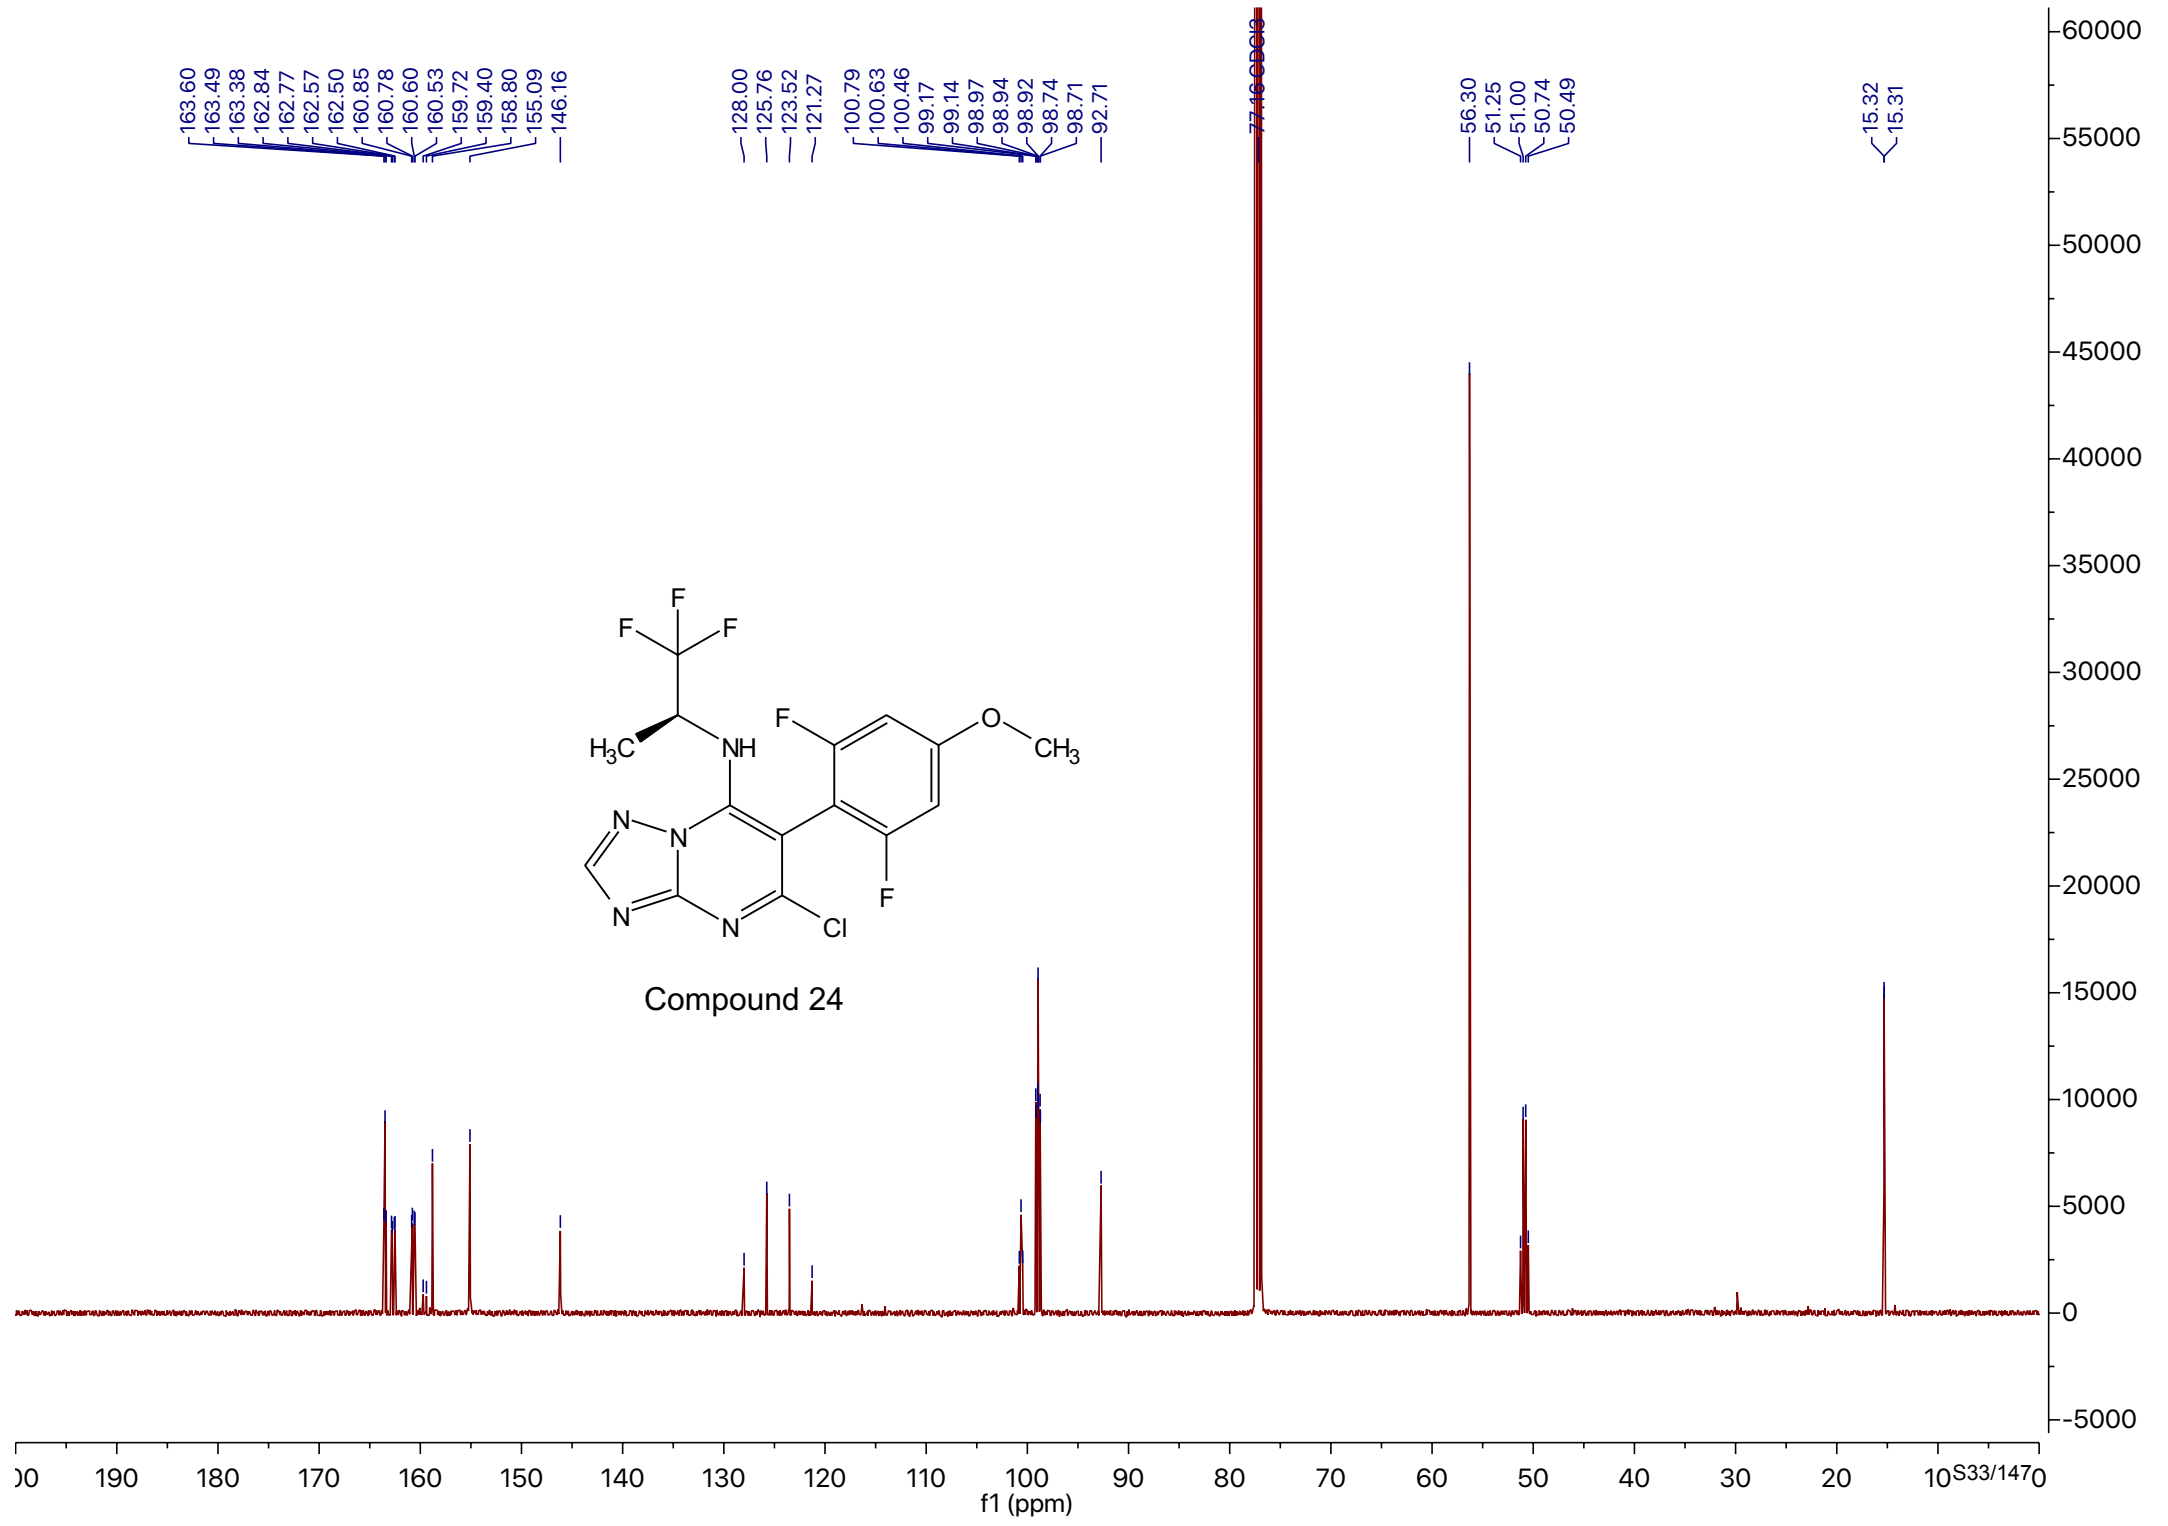

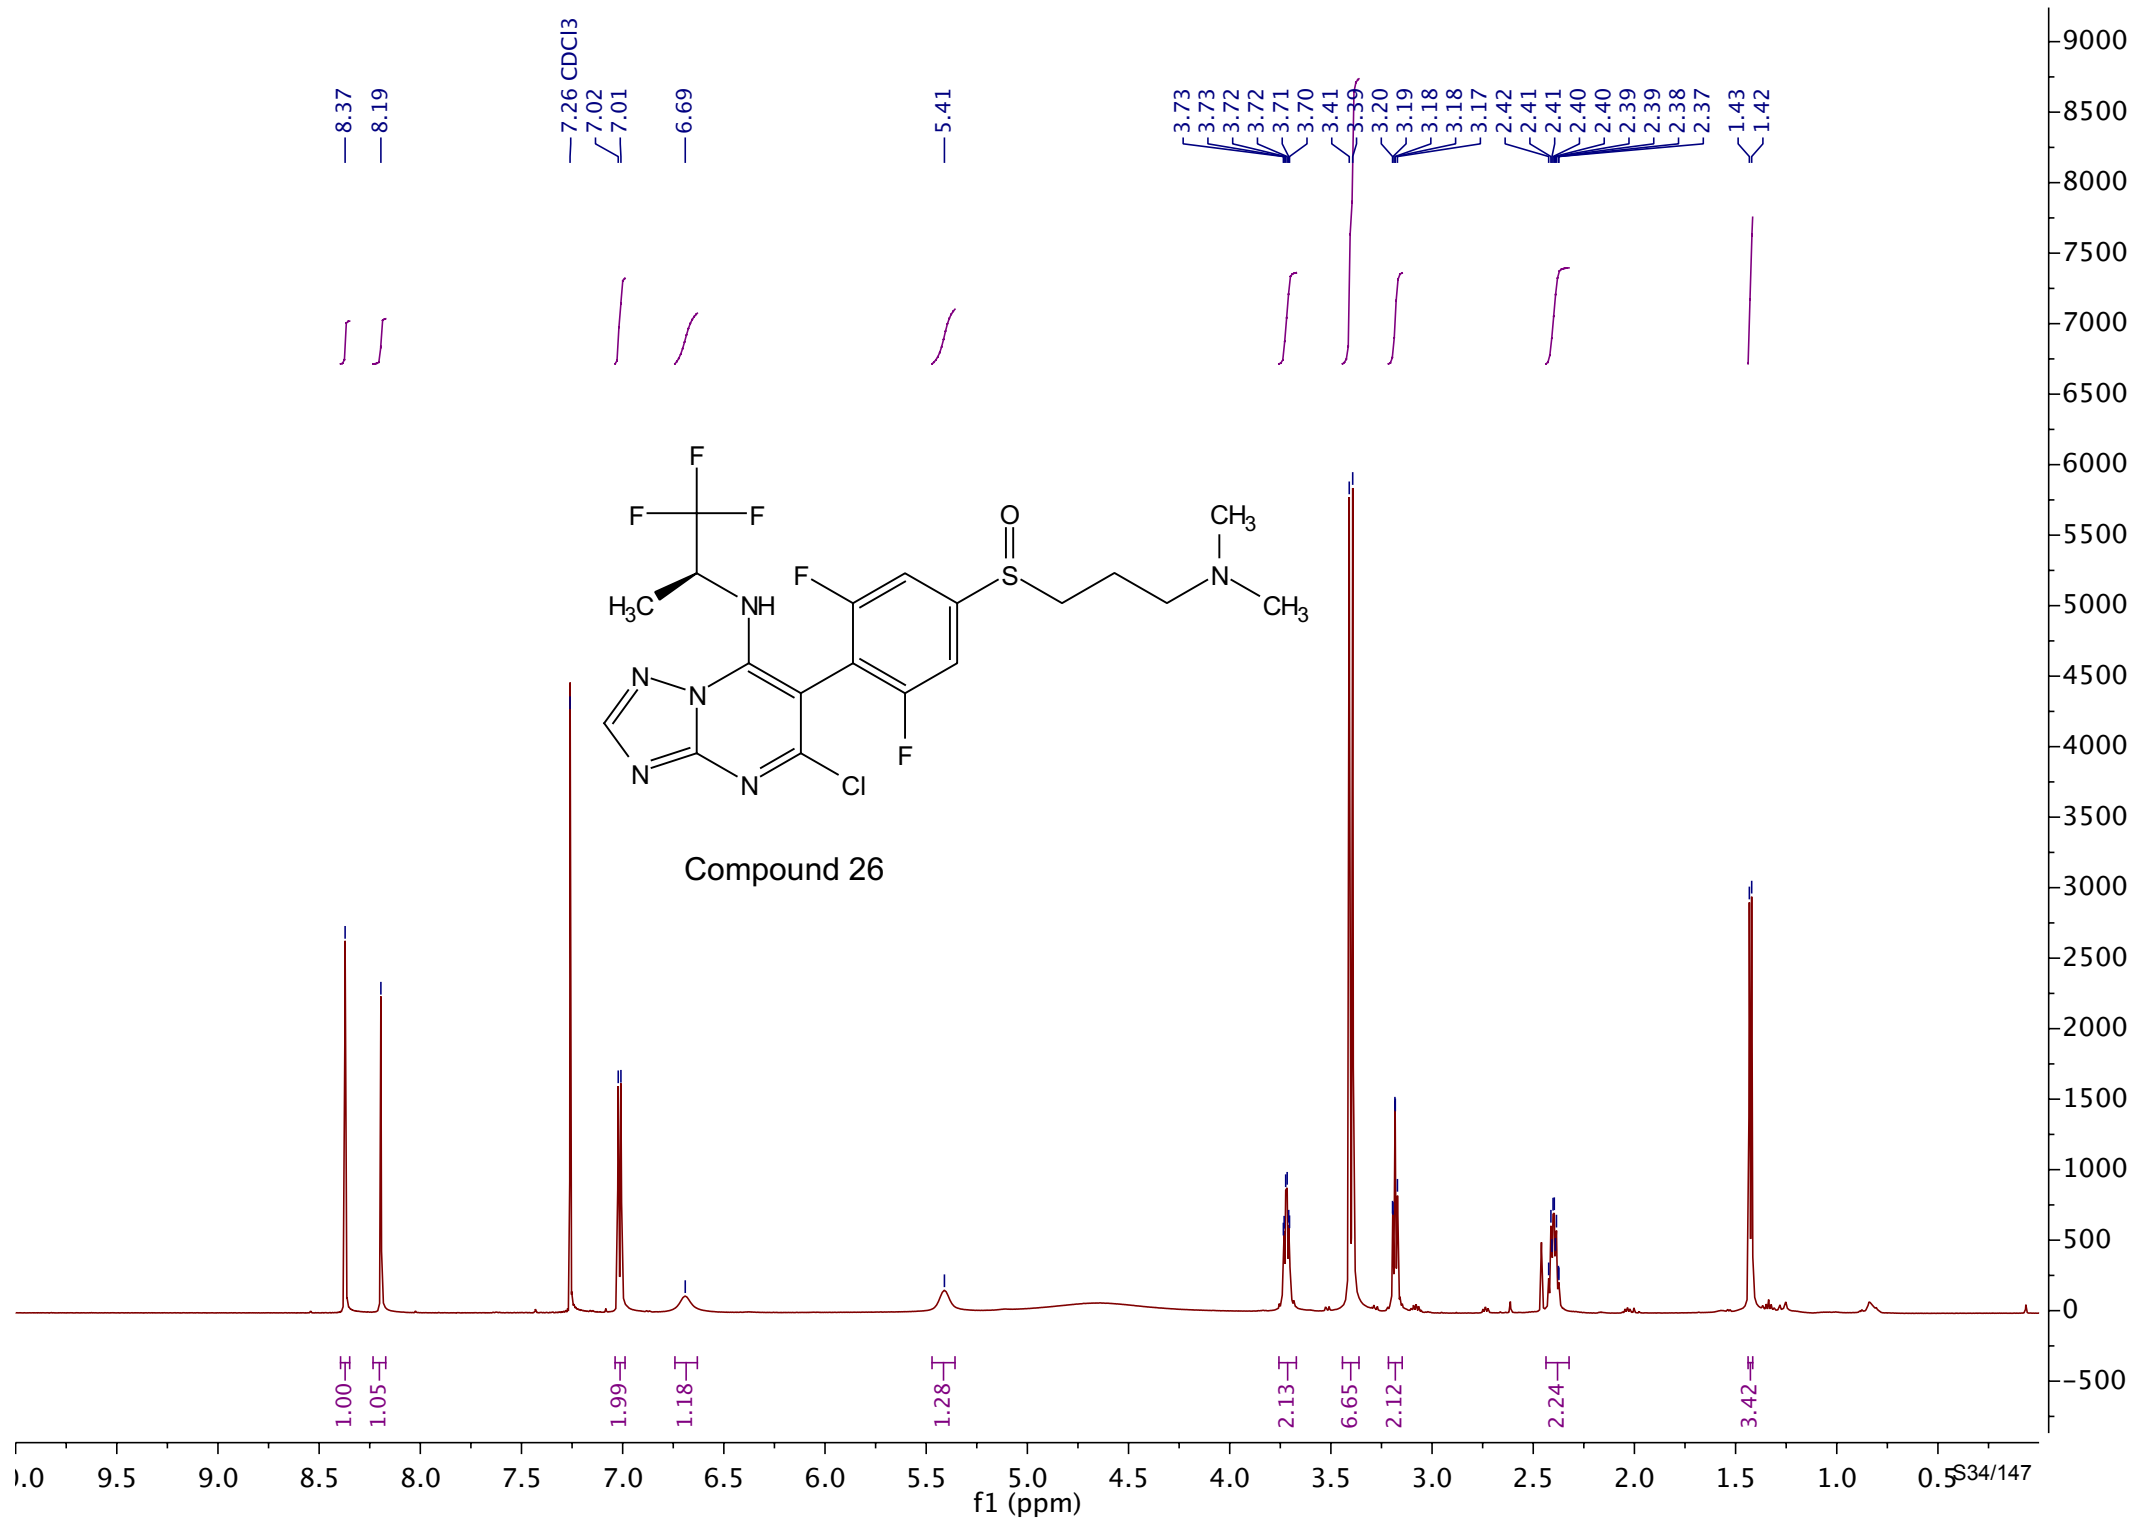

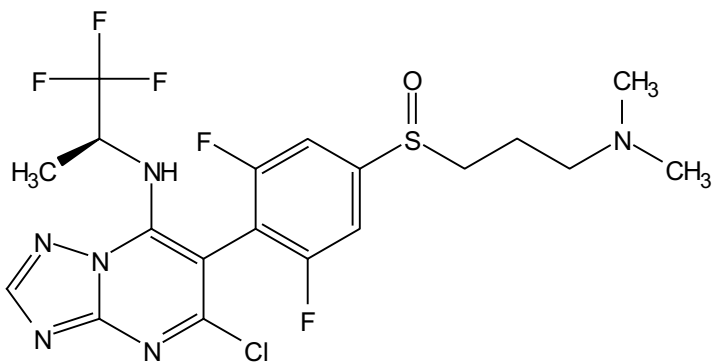

Compound 26

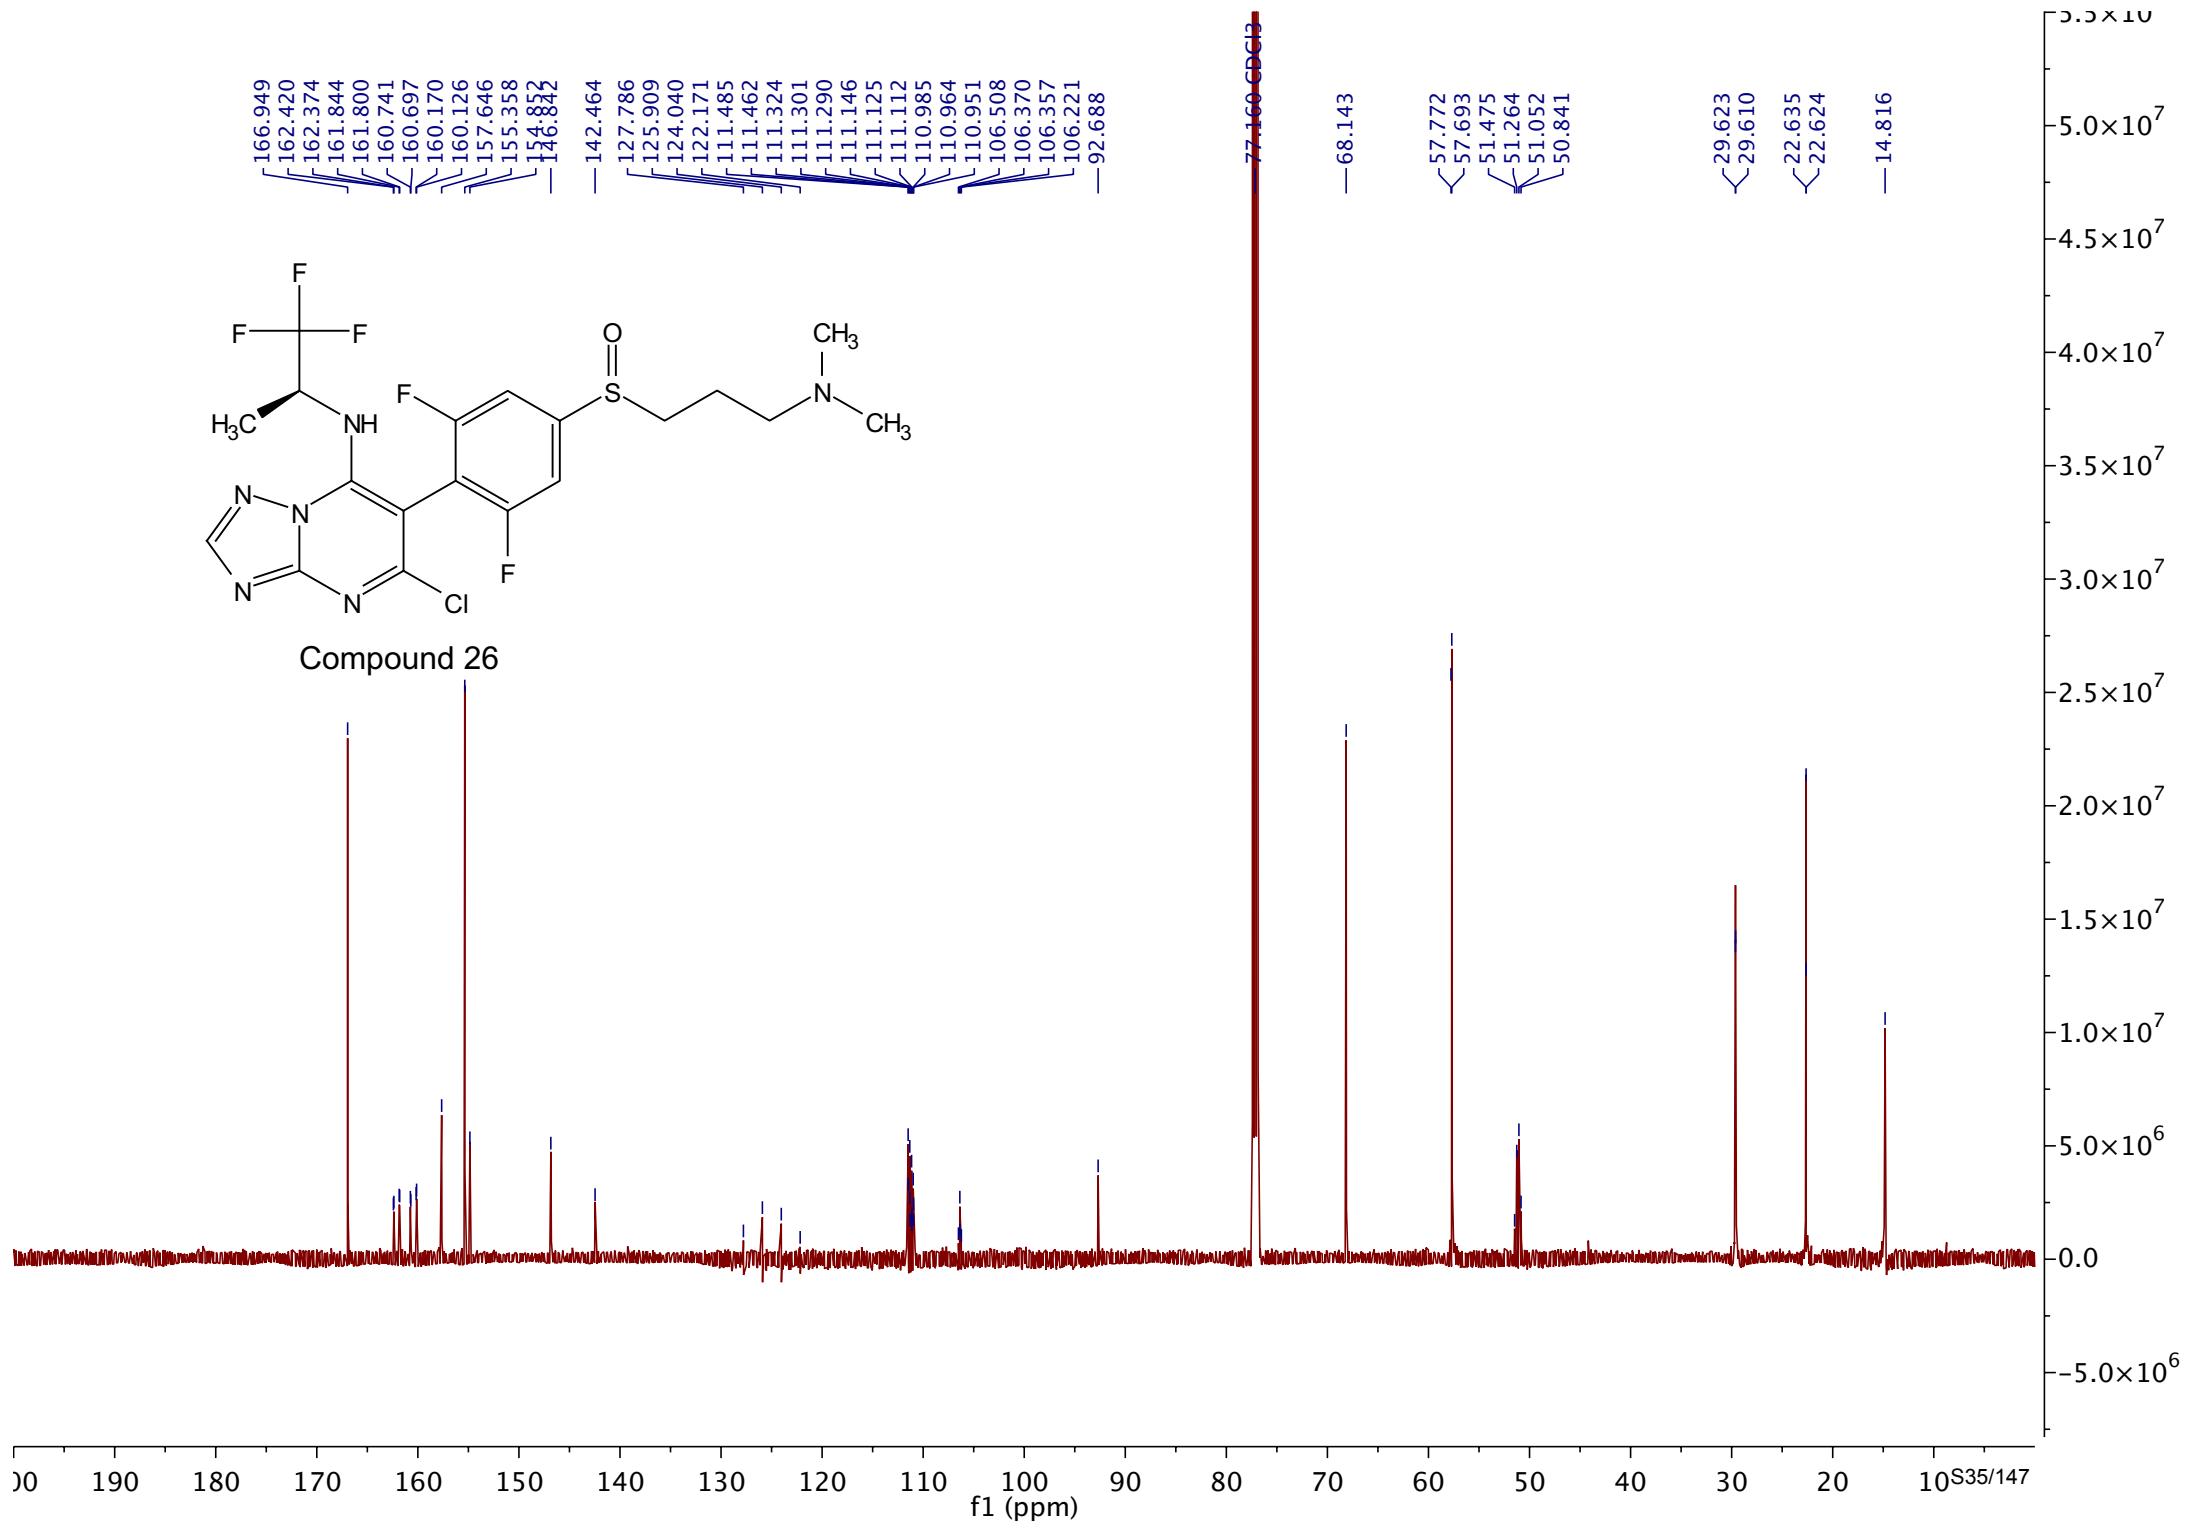

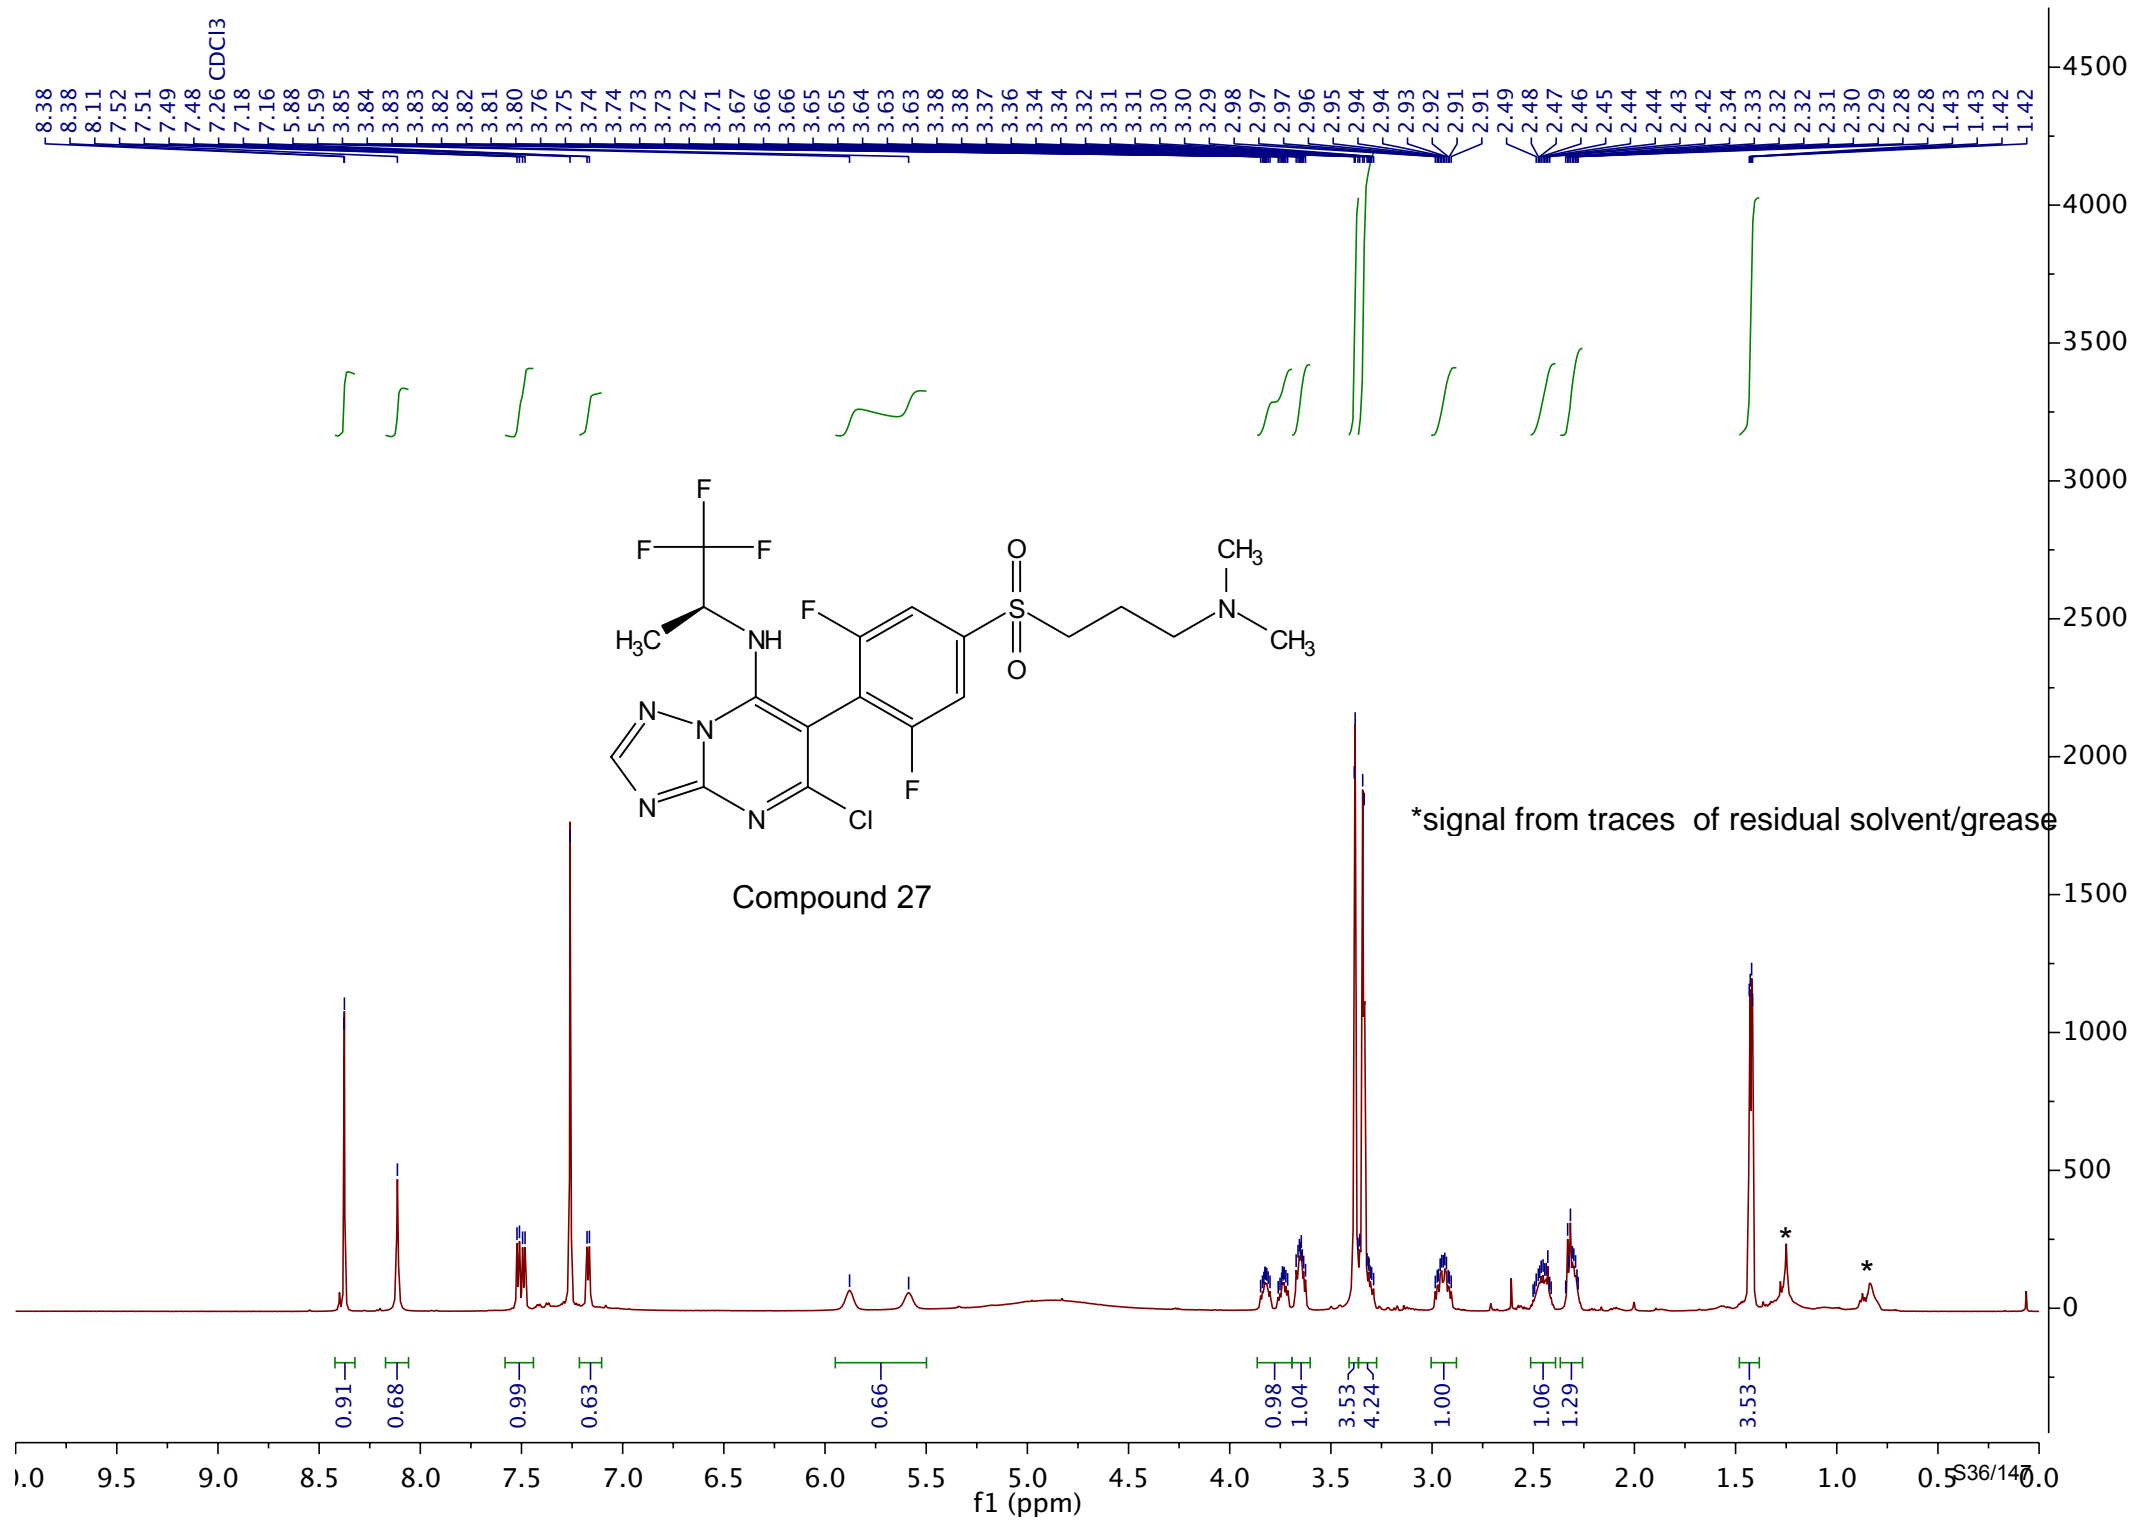

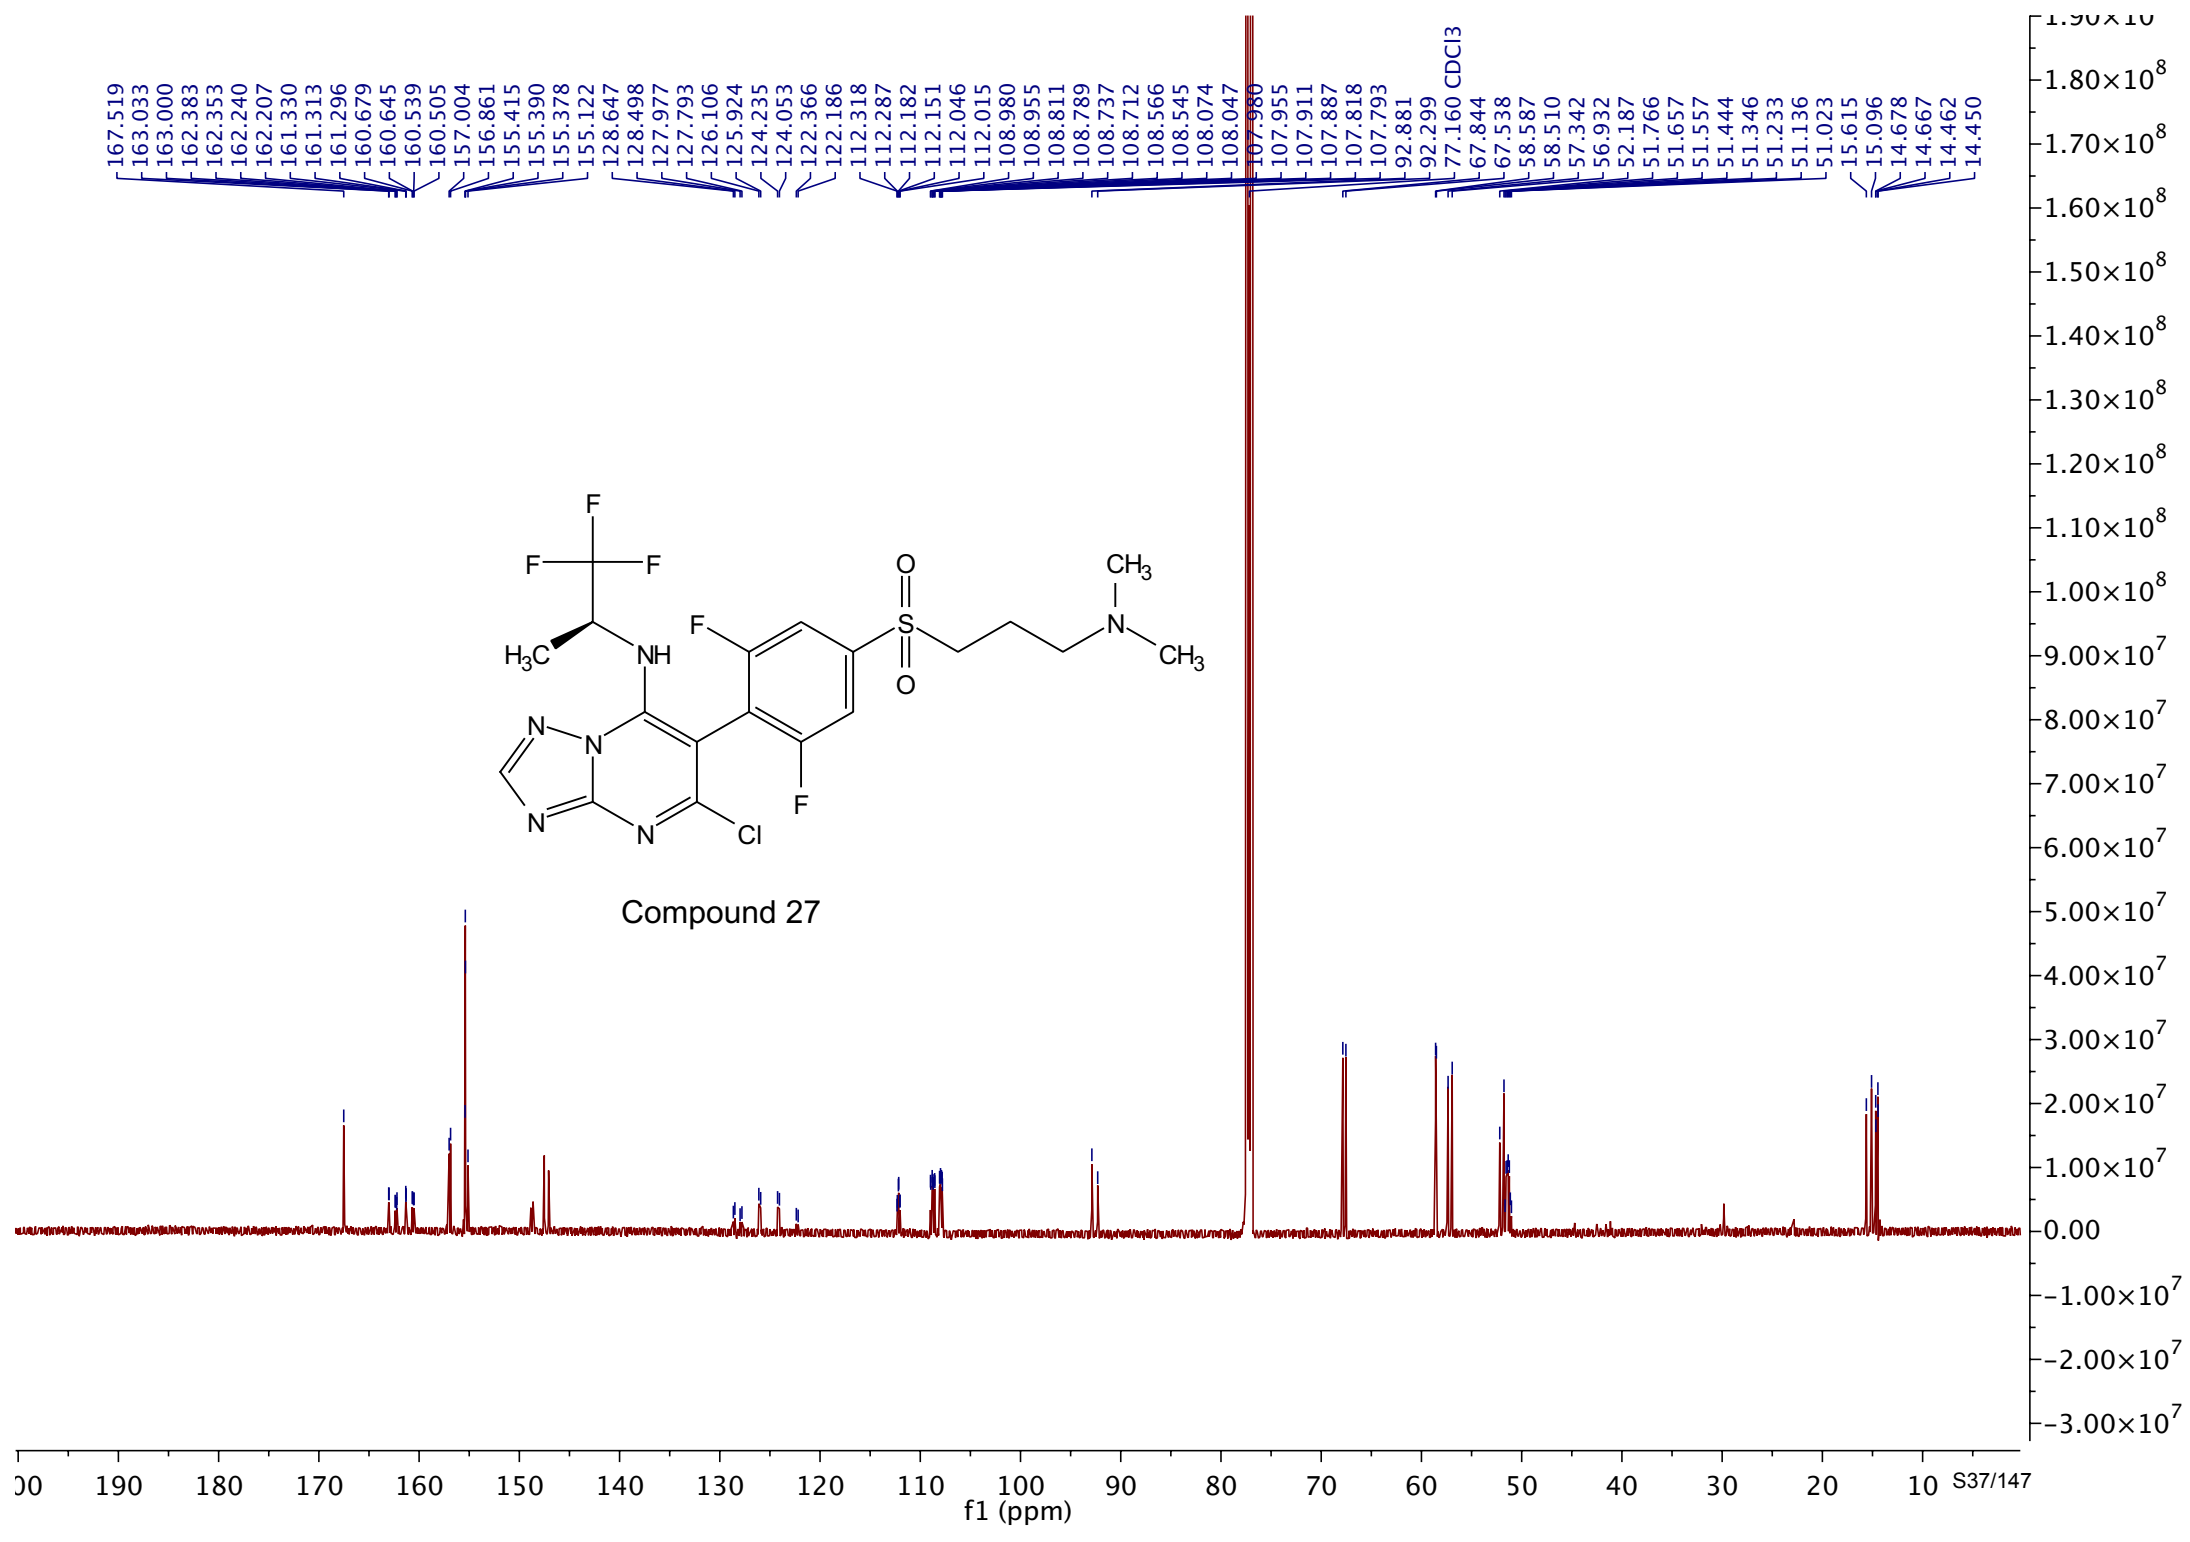

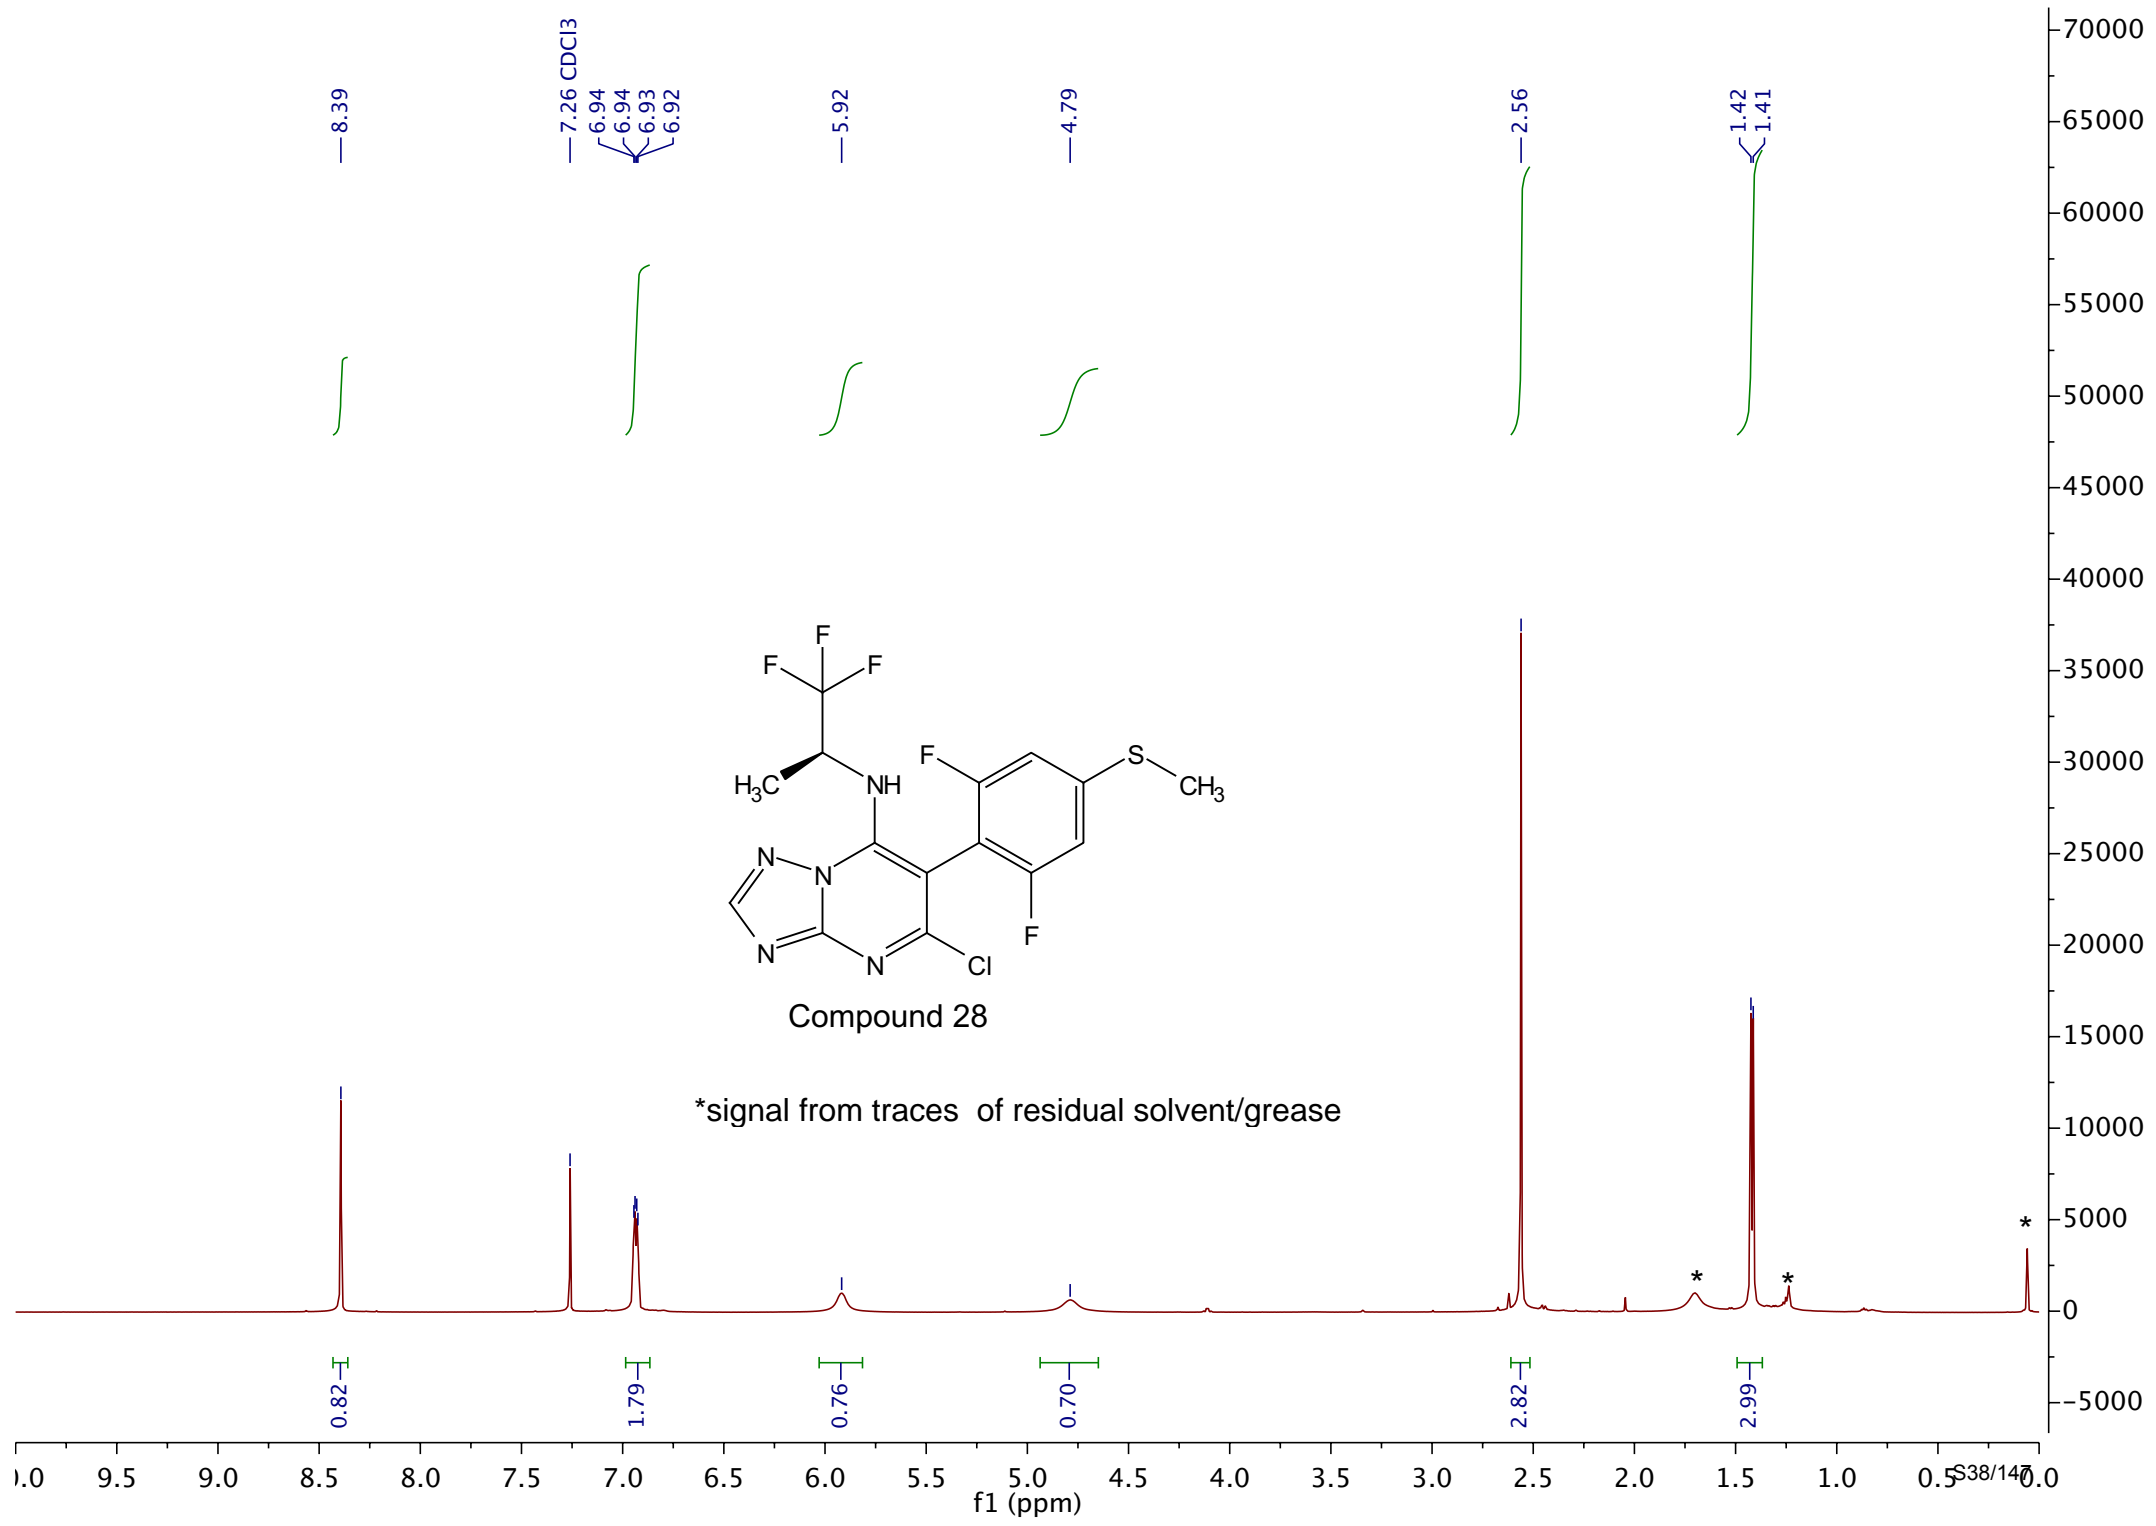

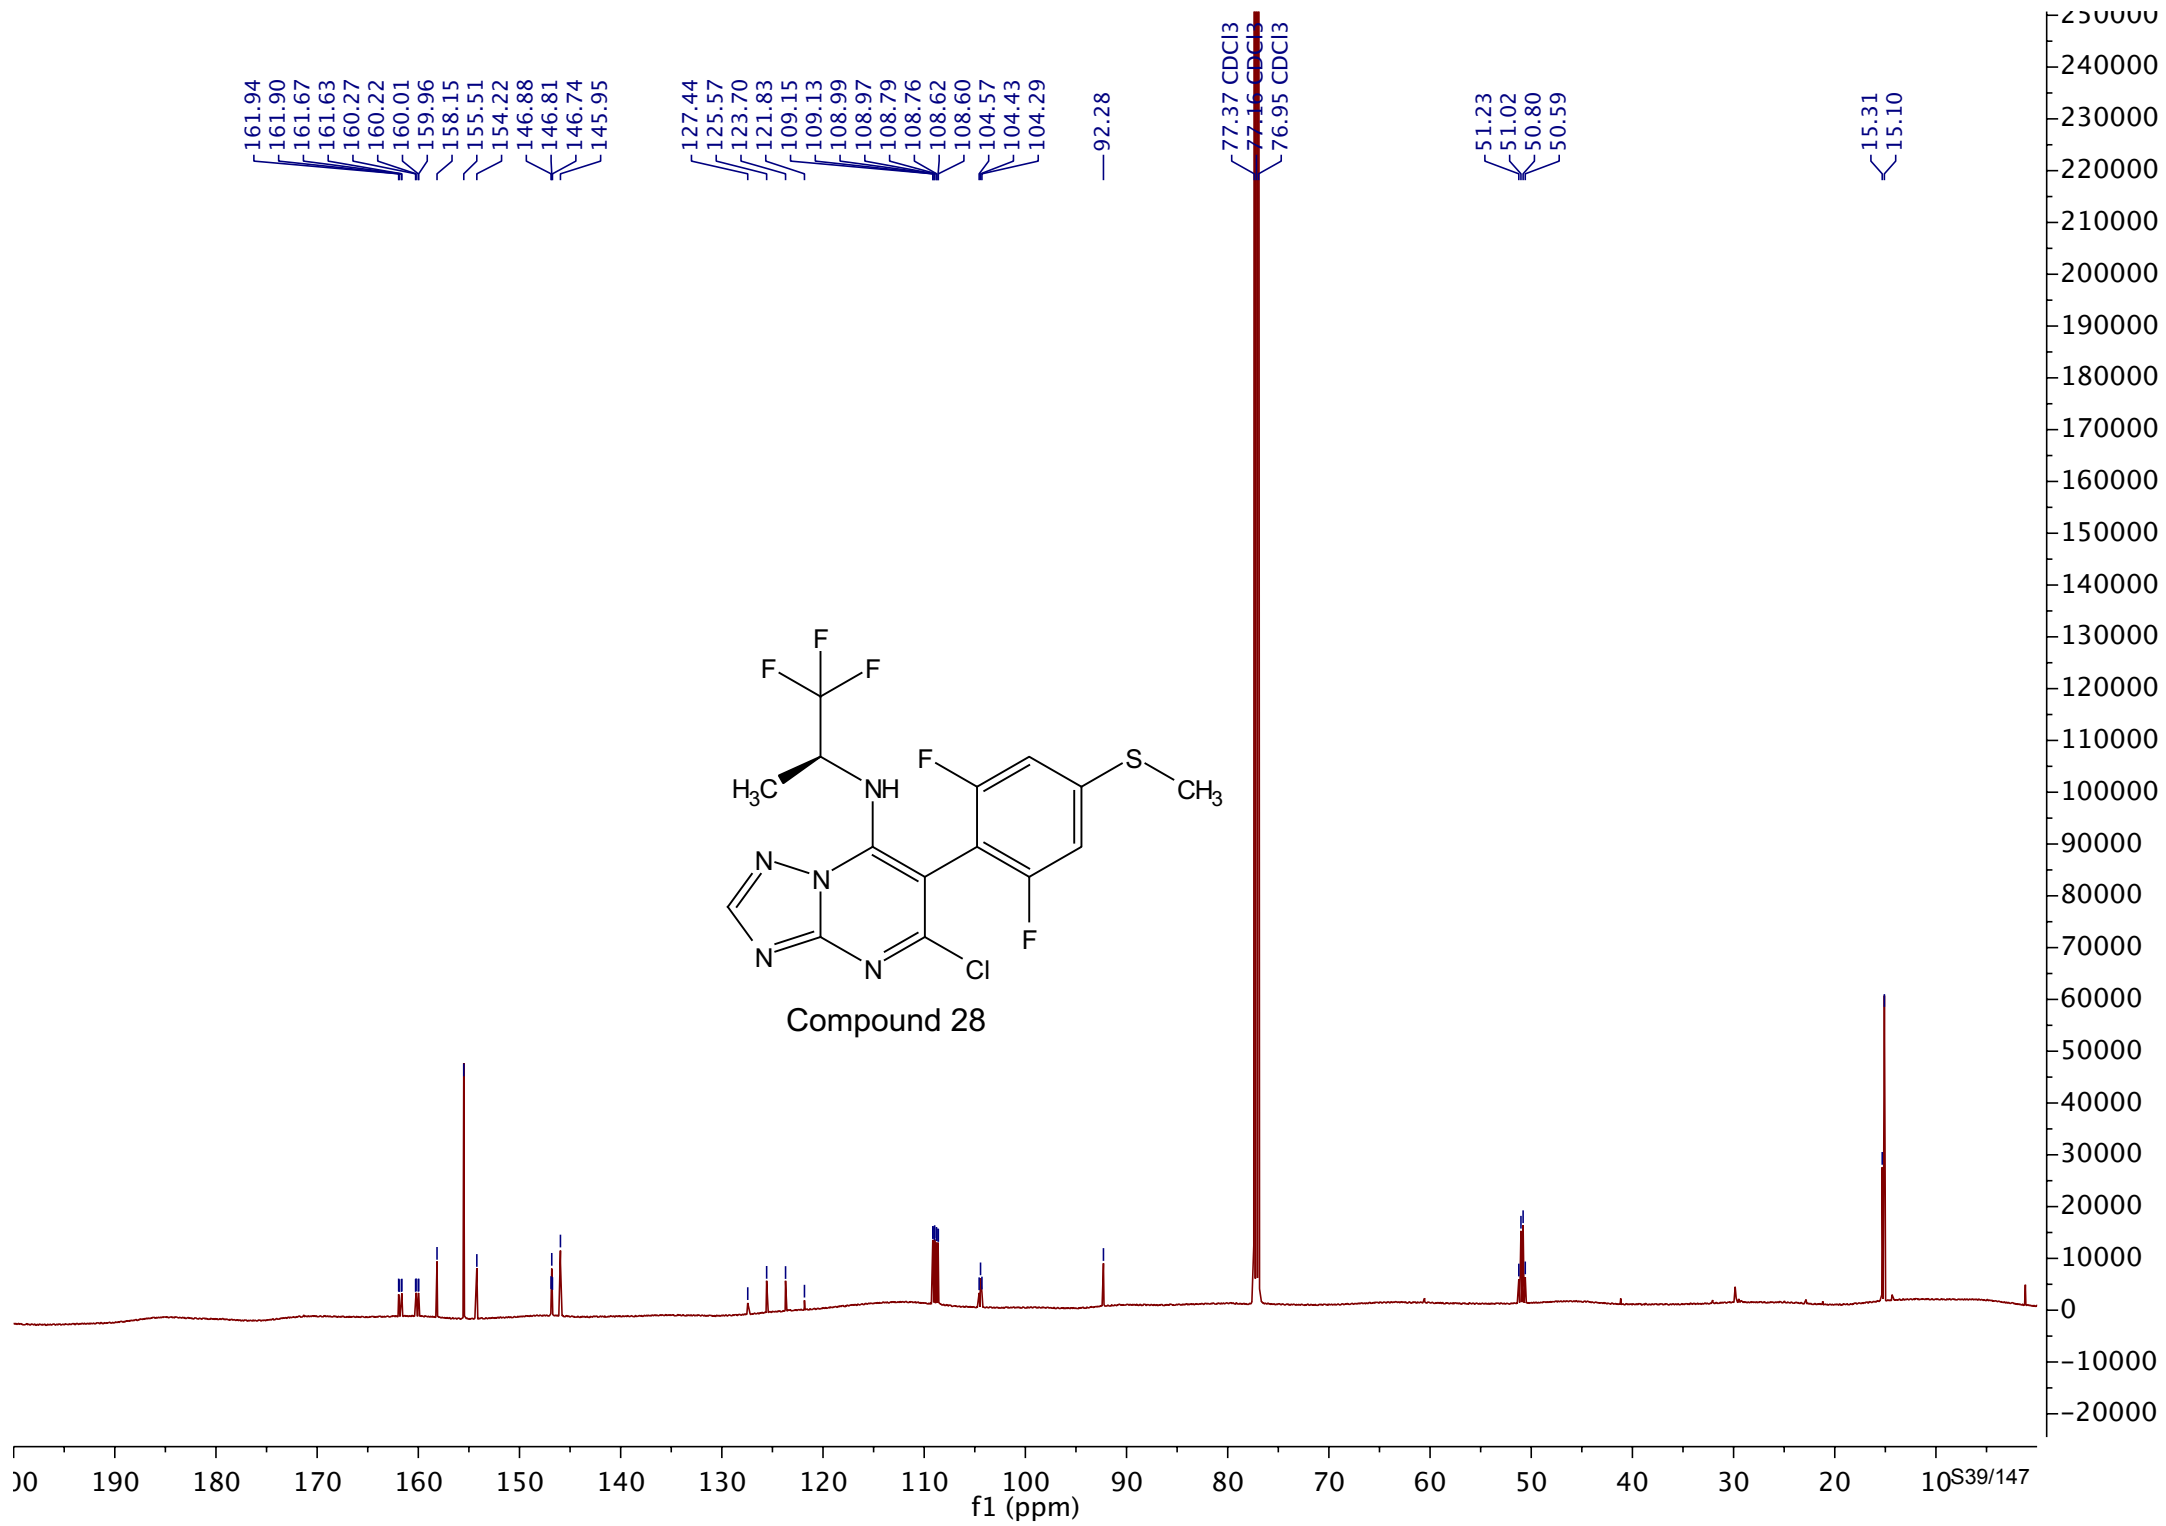



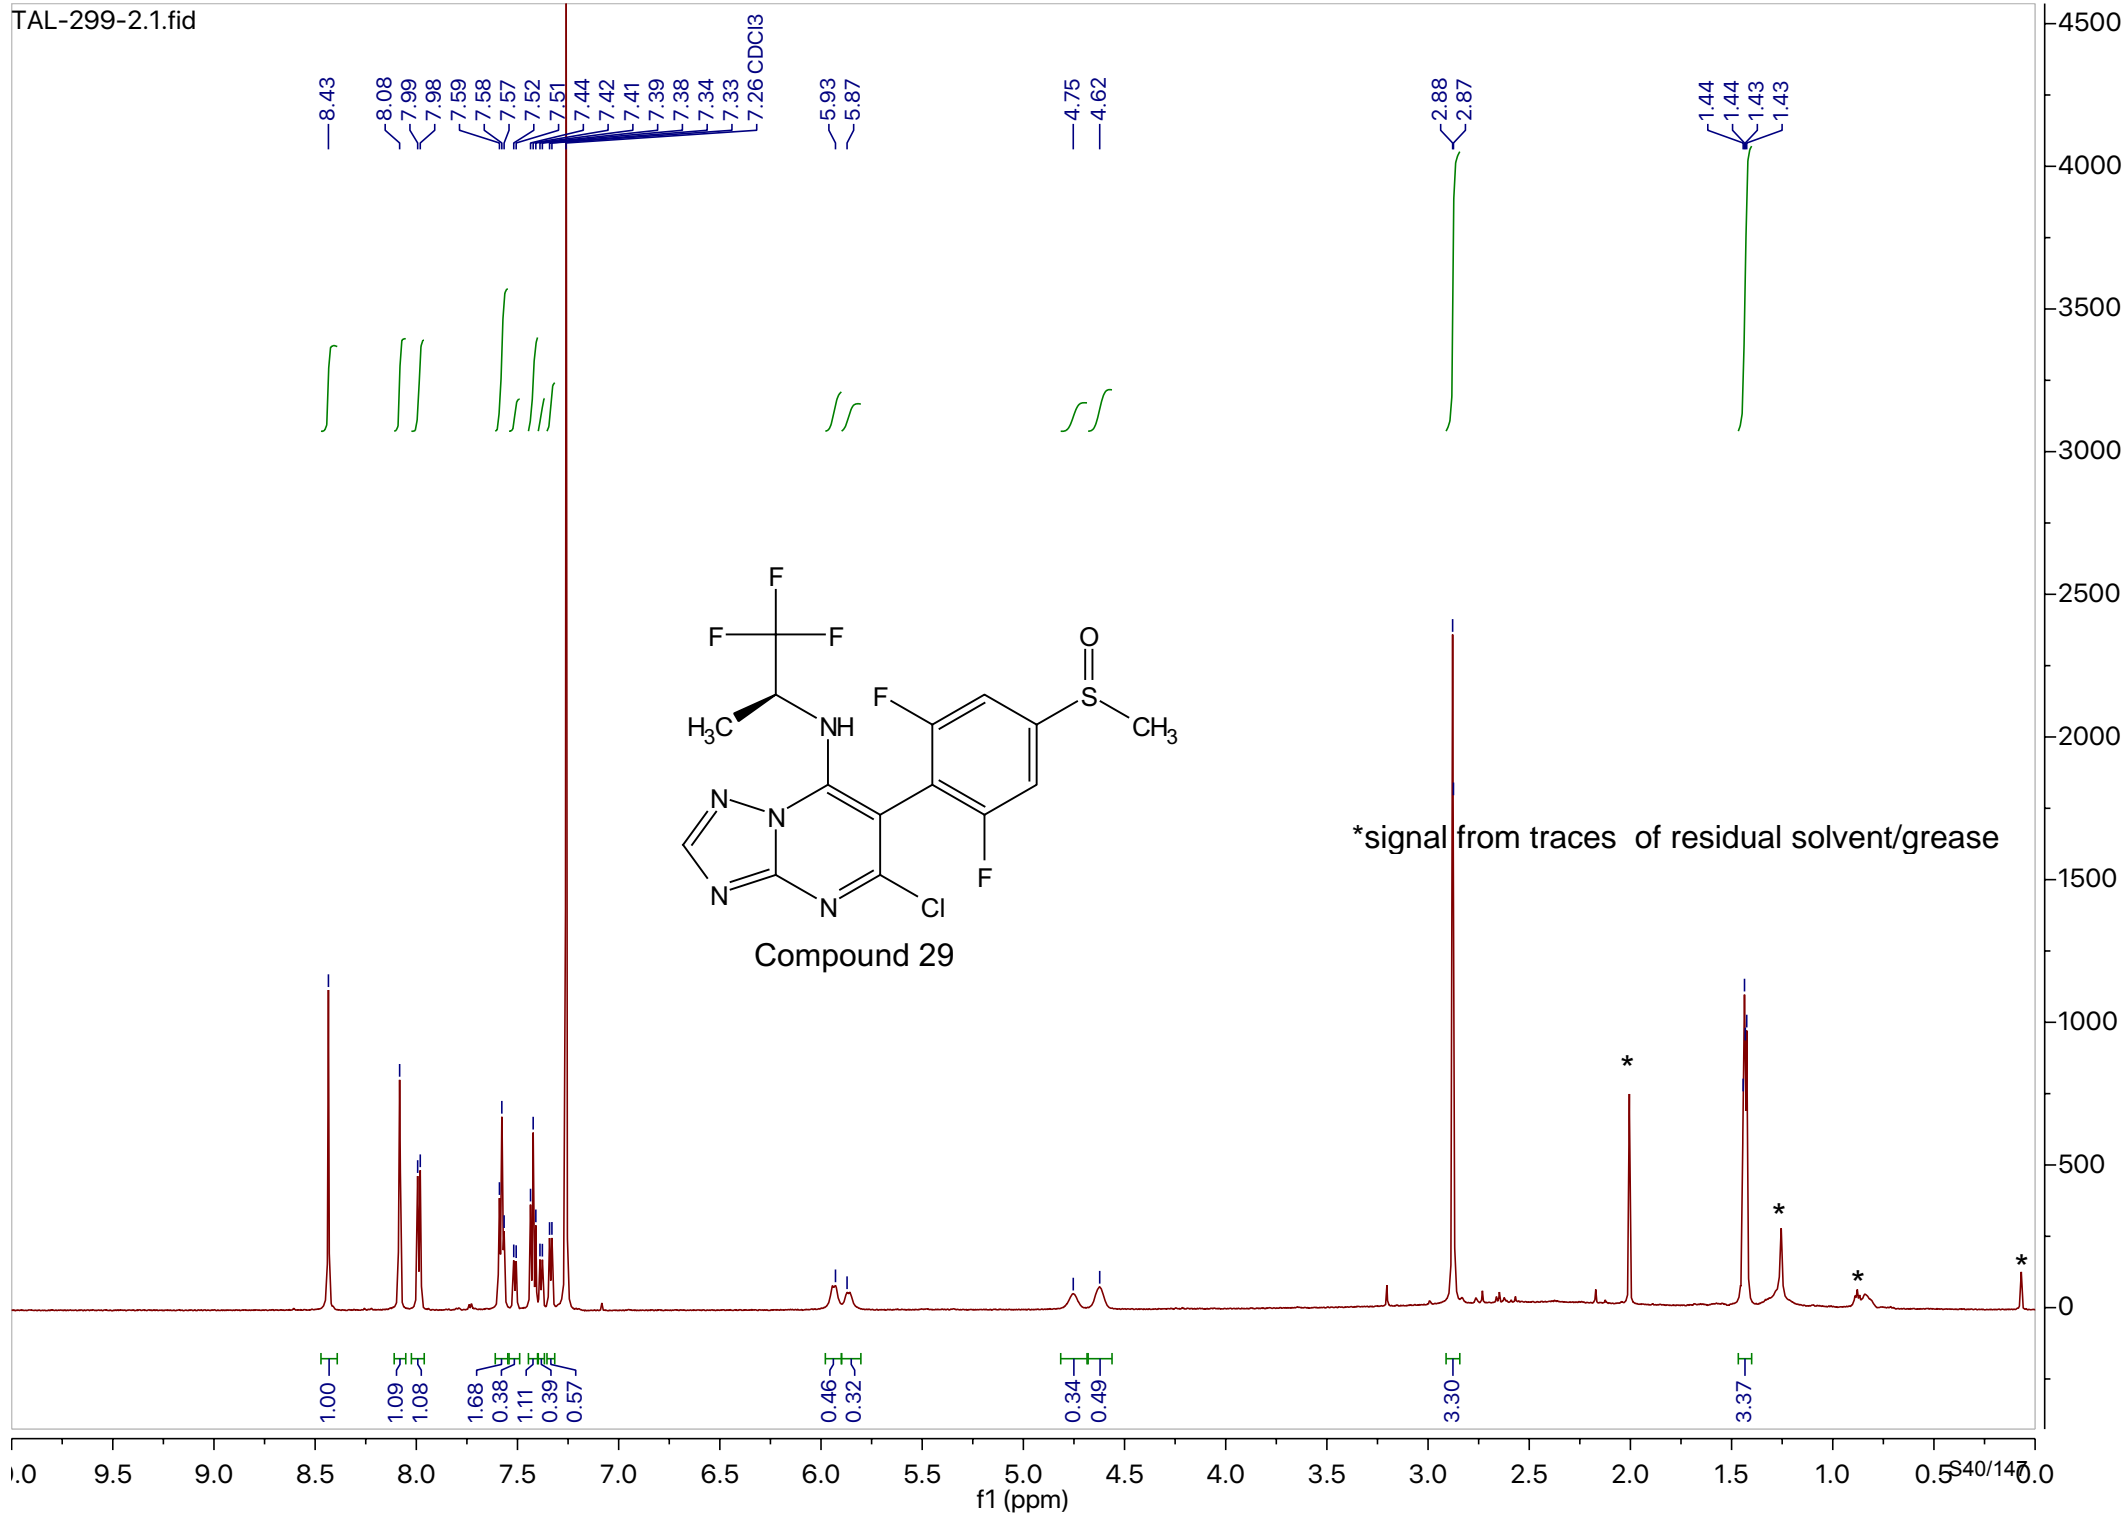

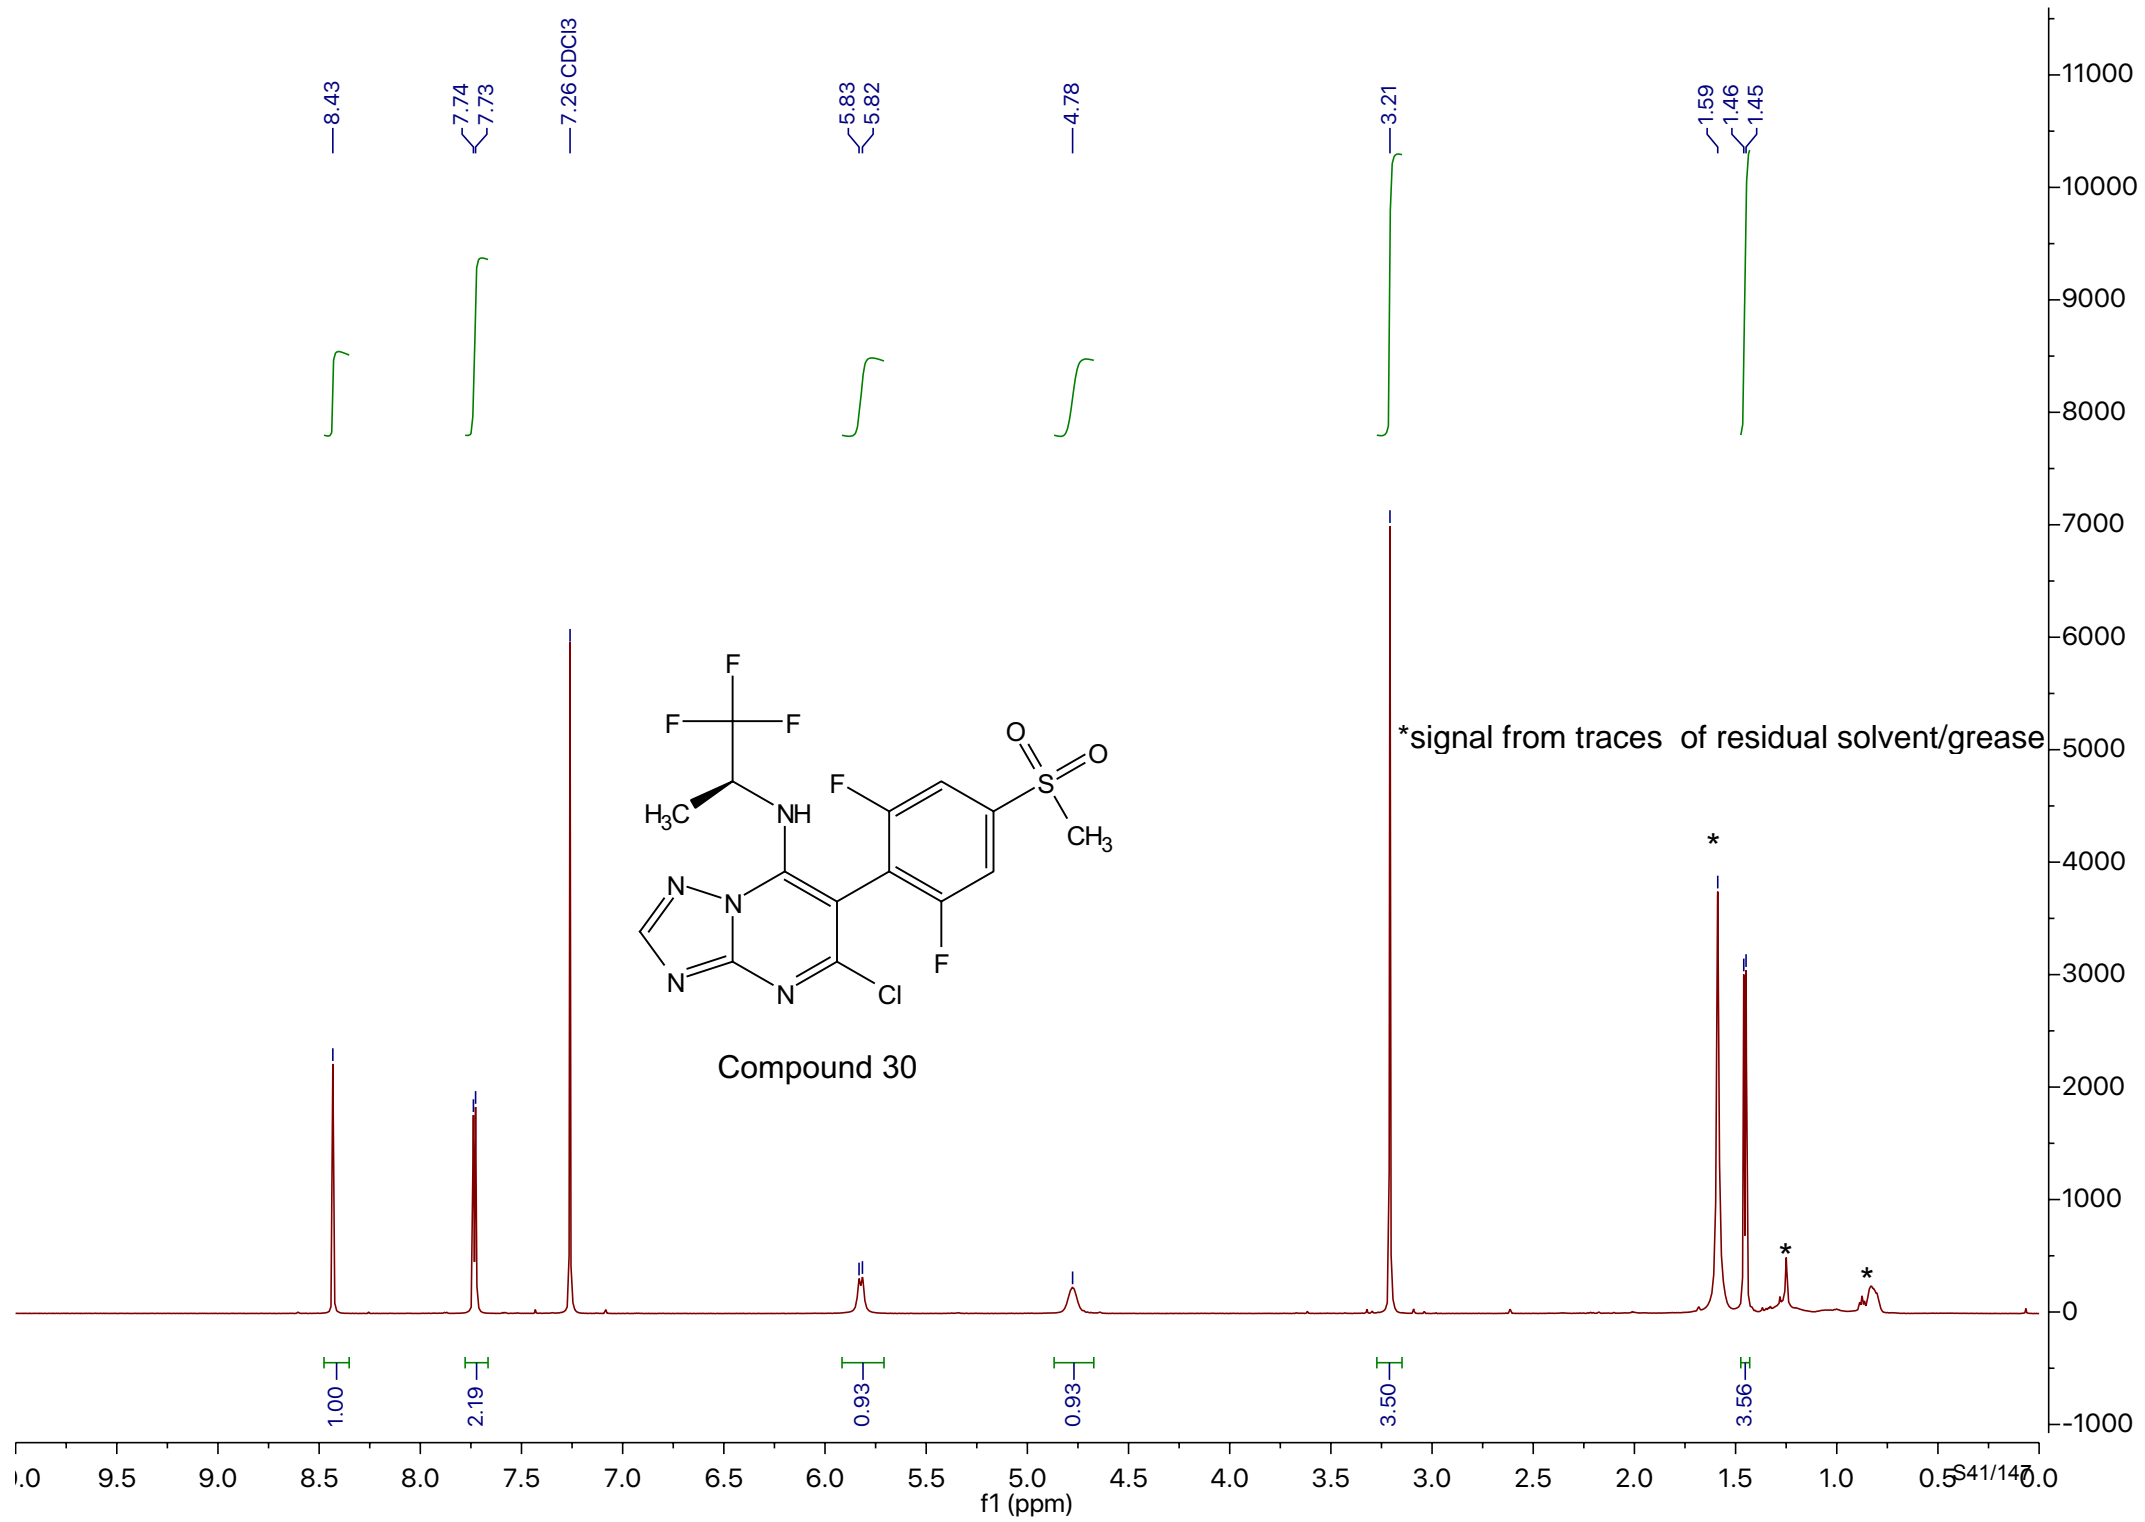

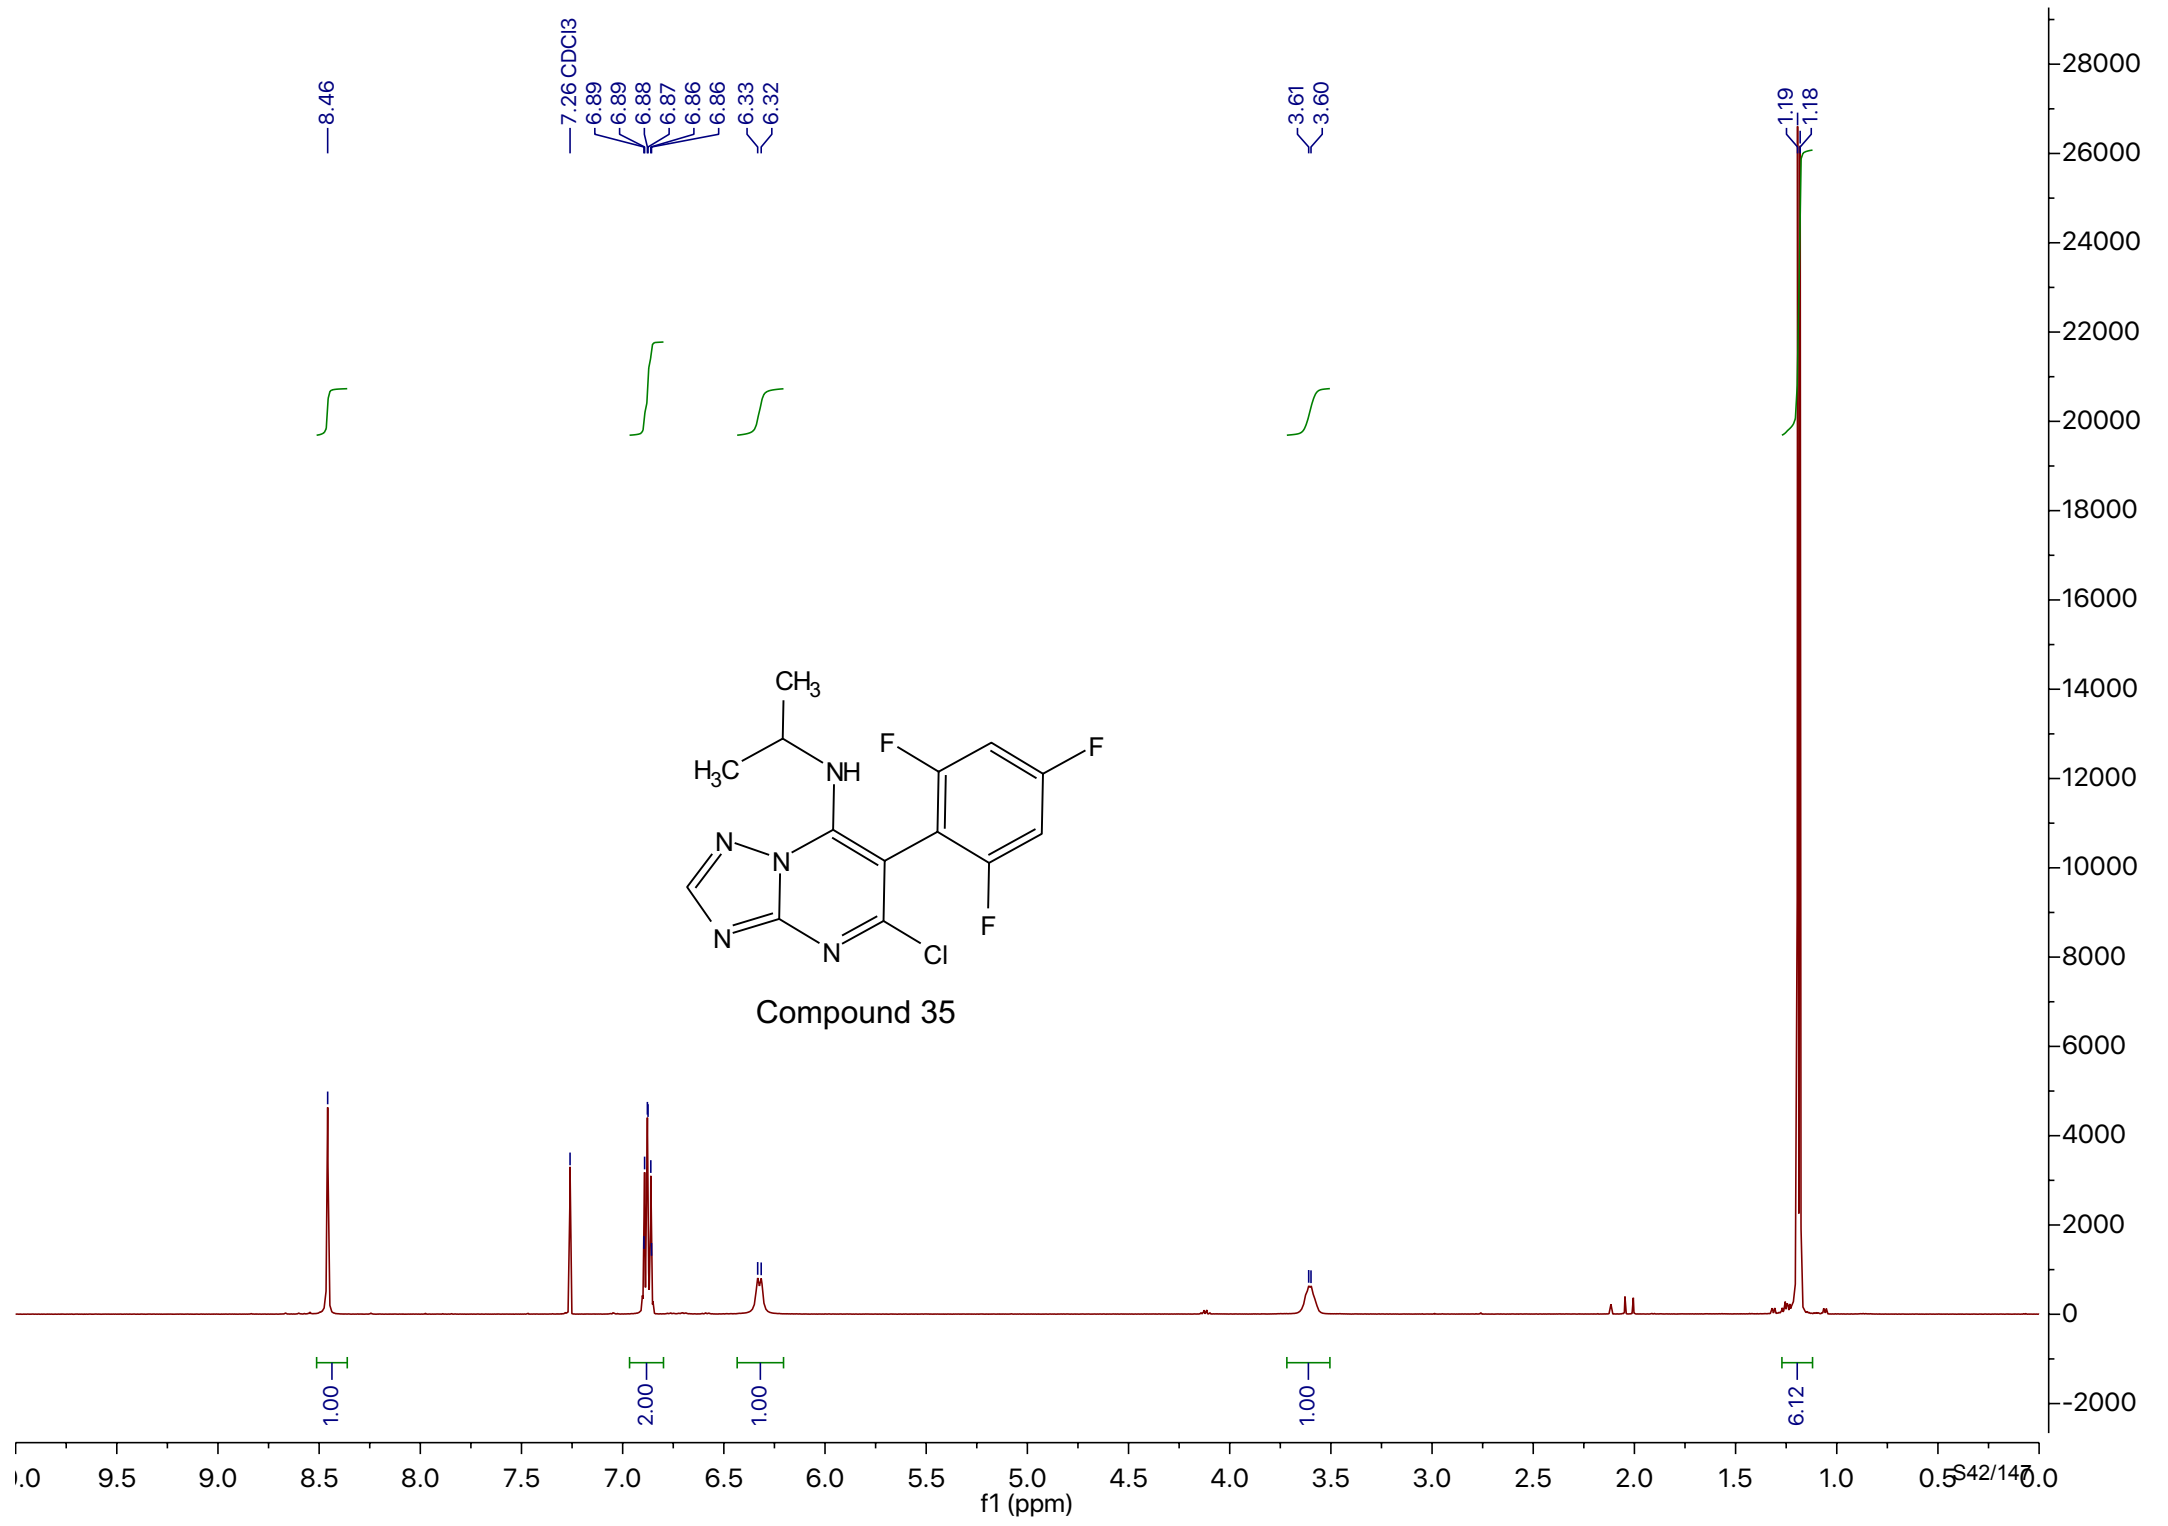

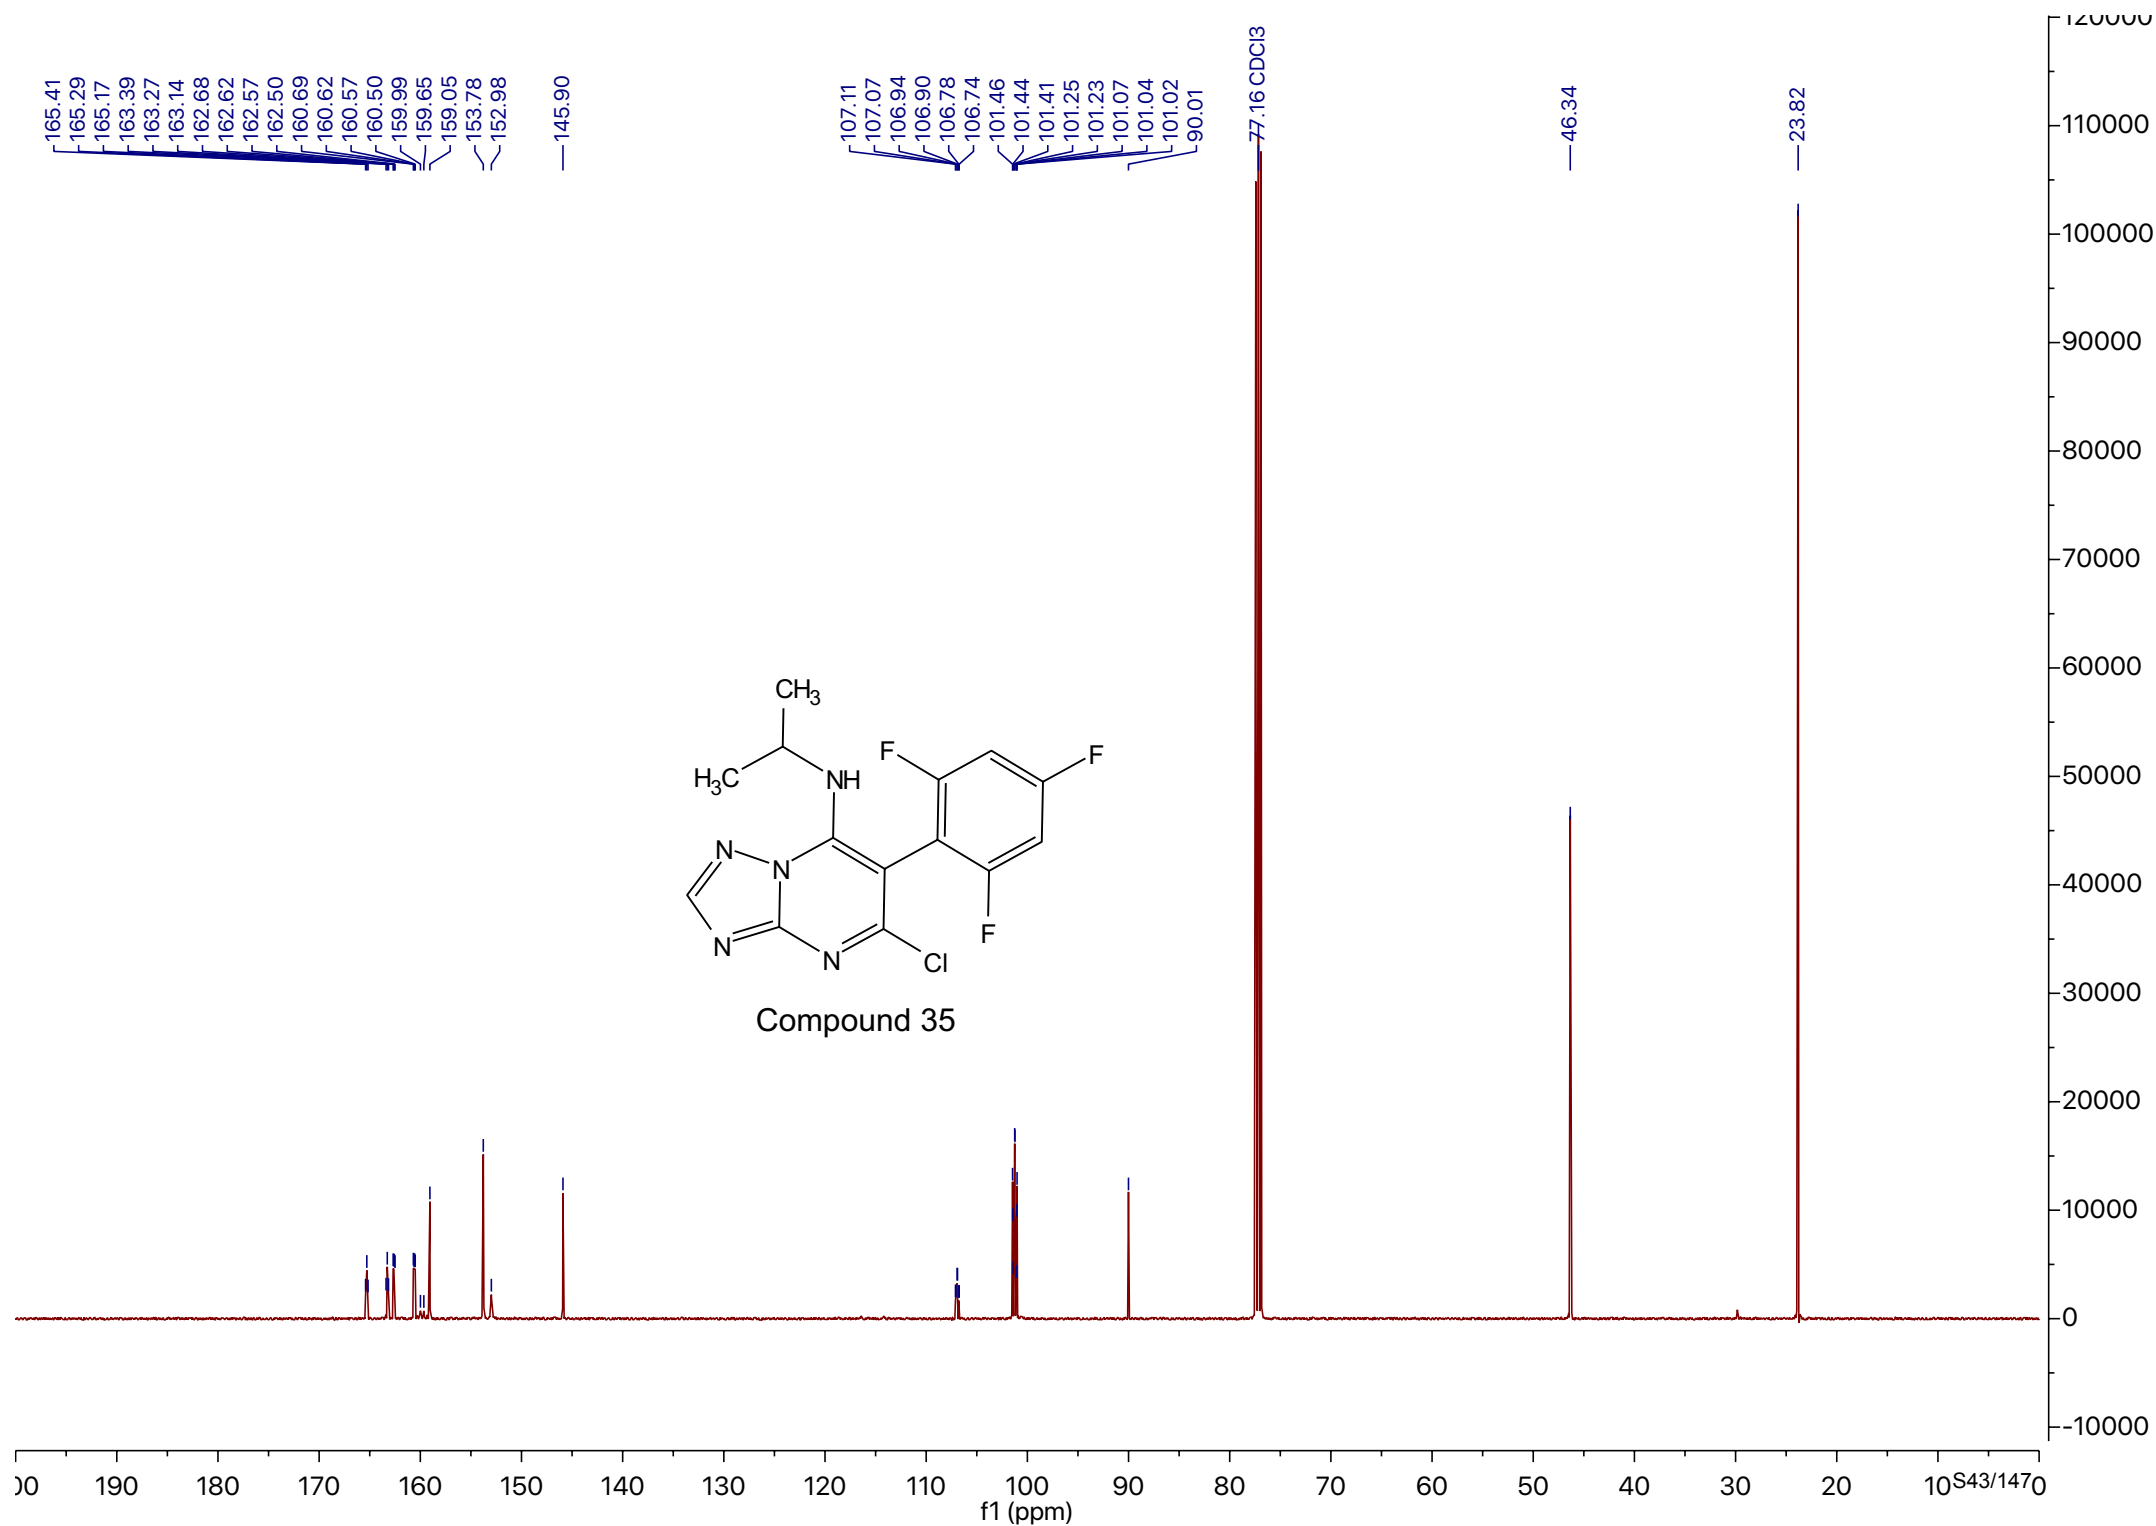

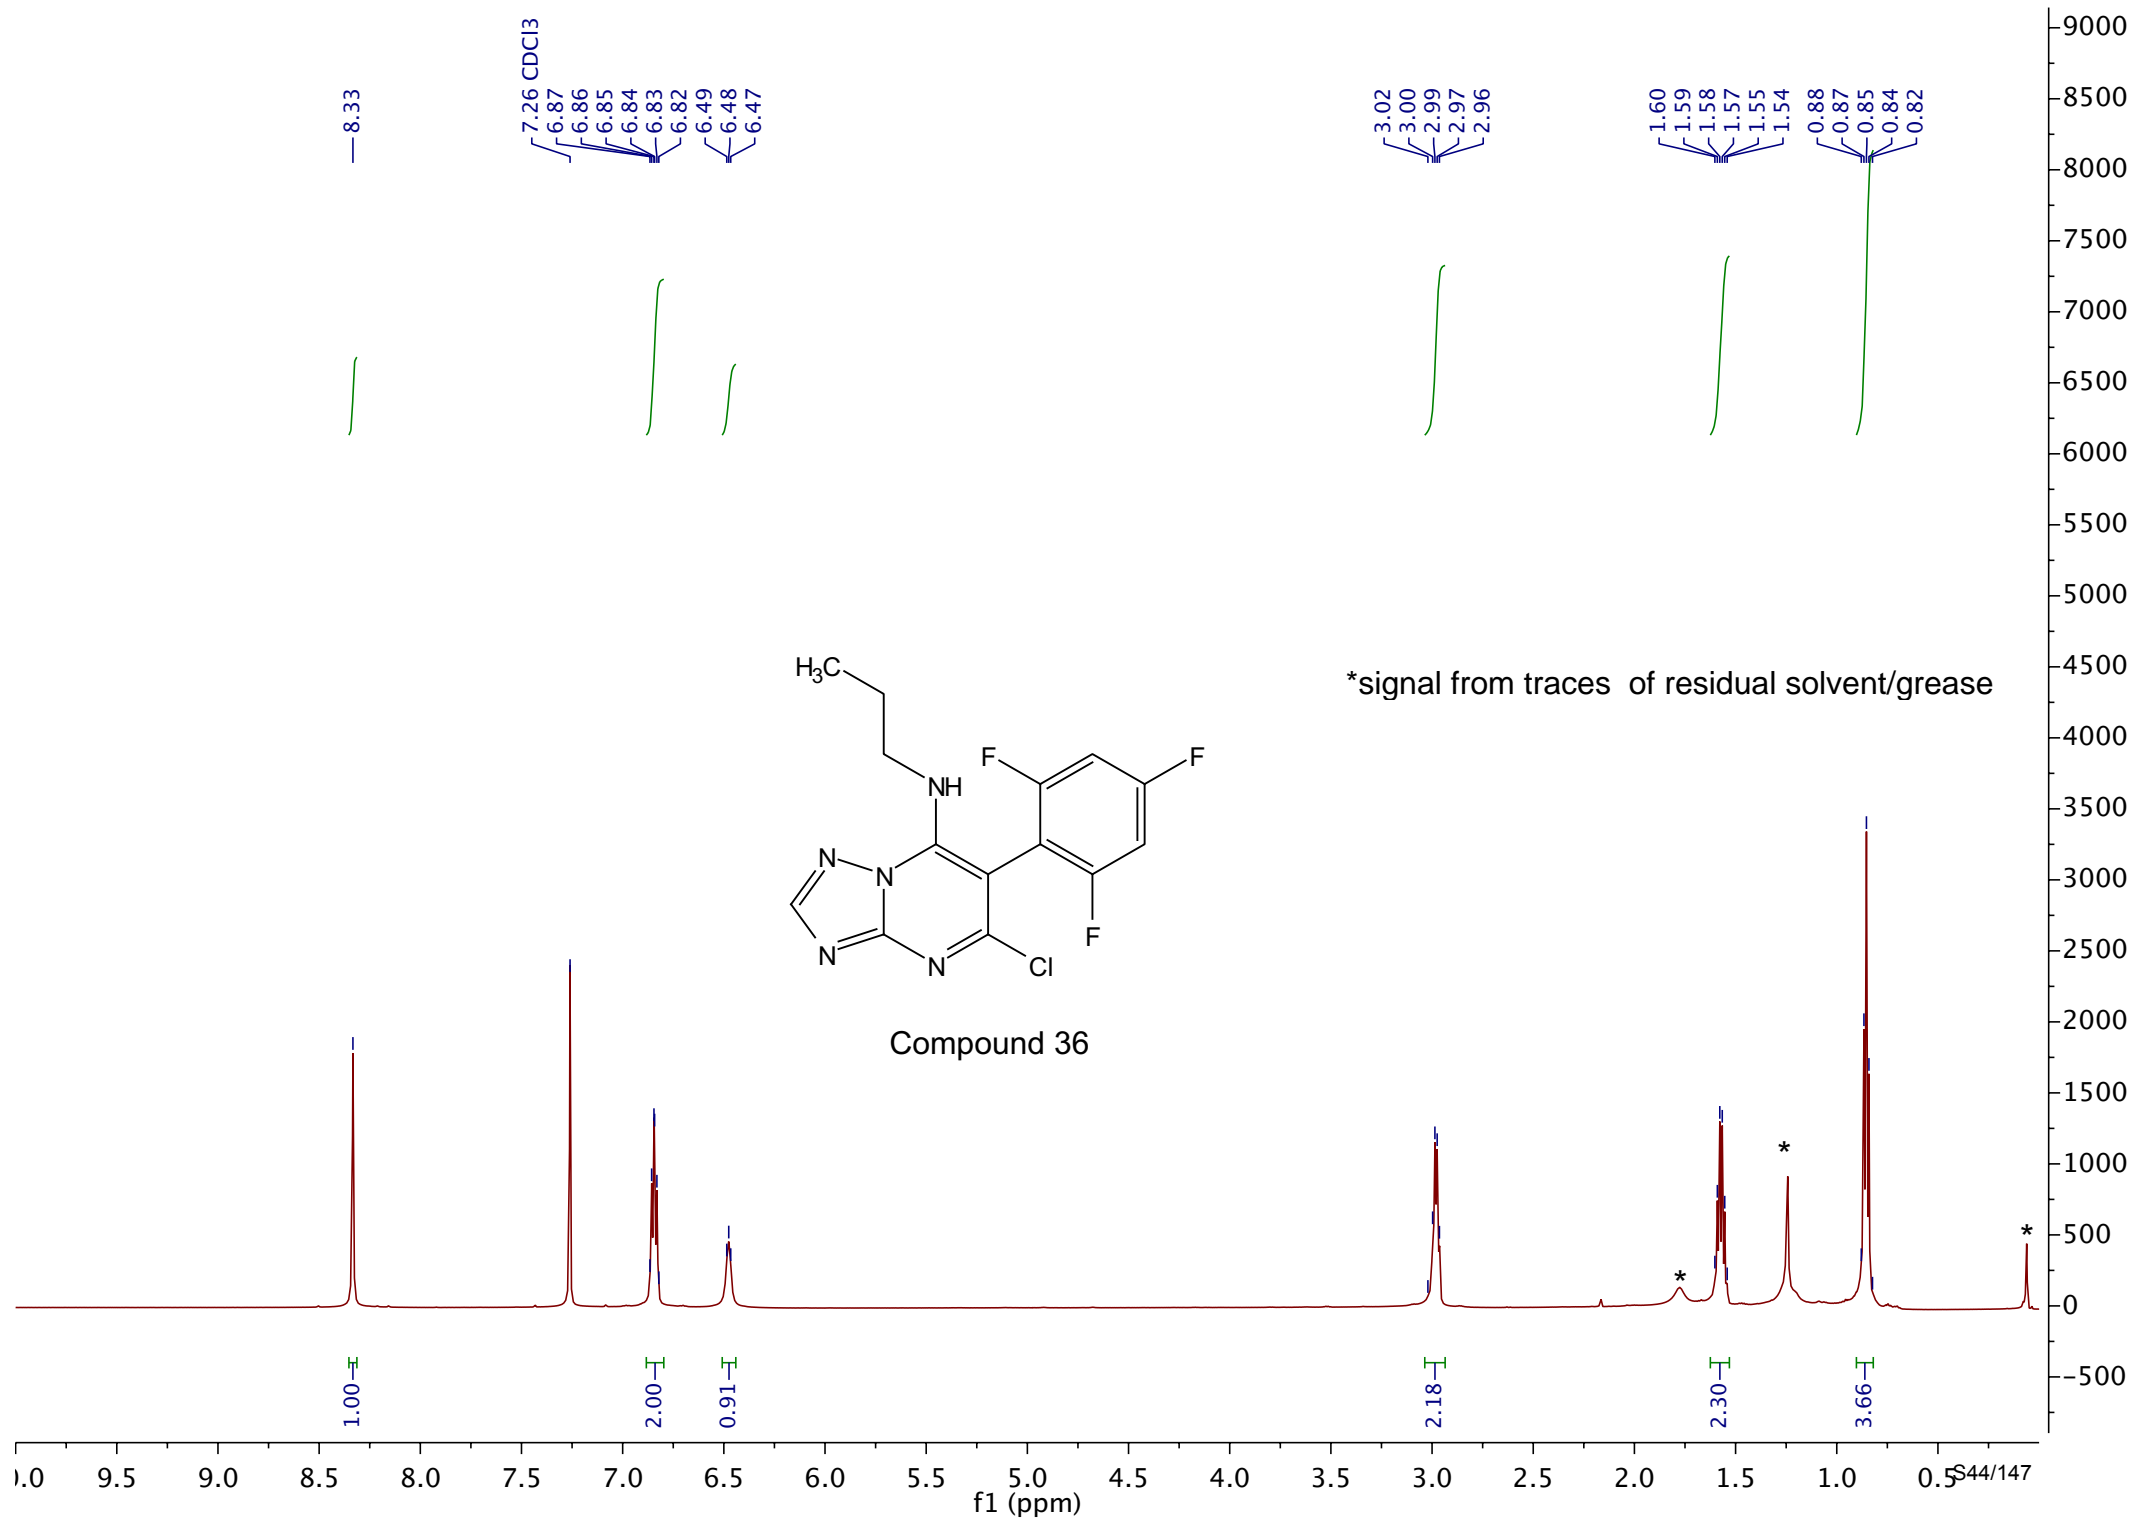

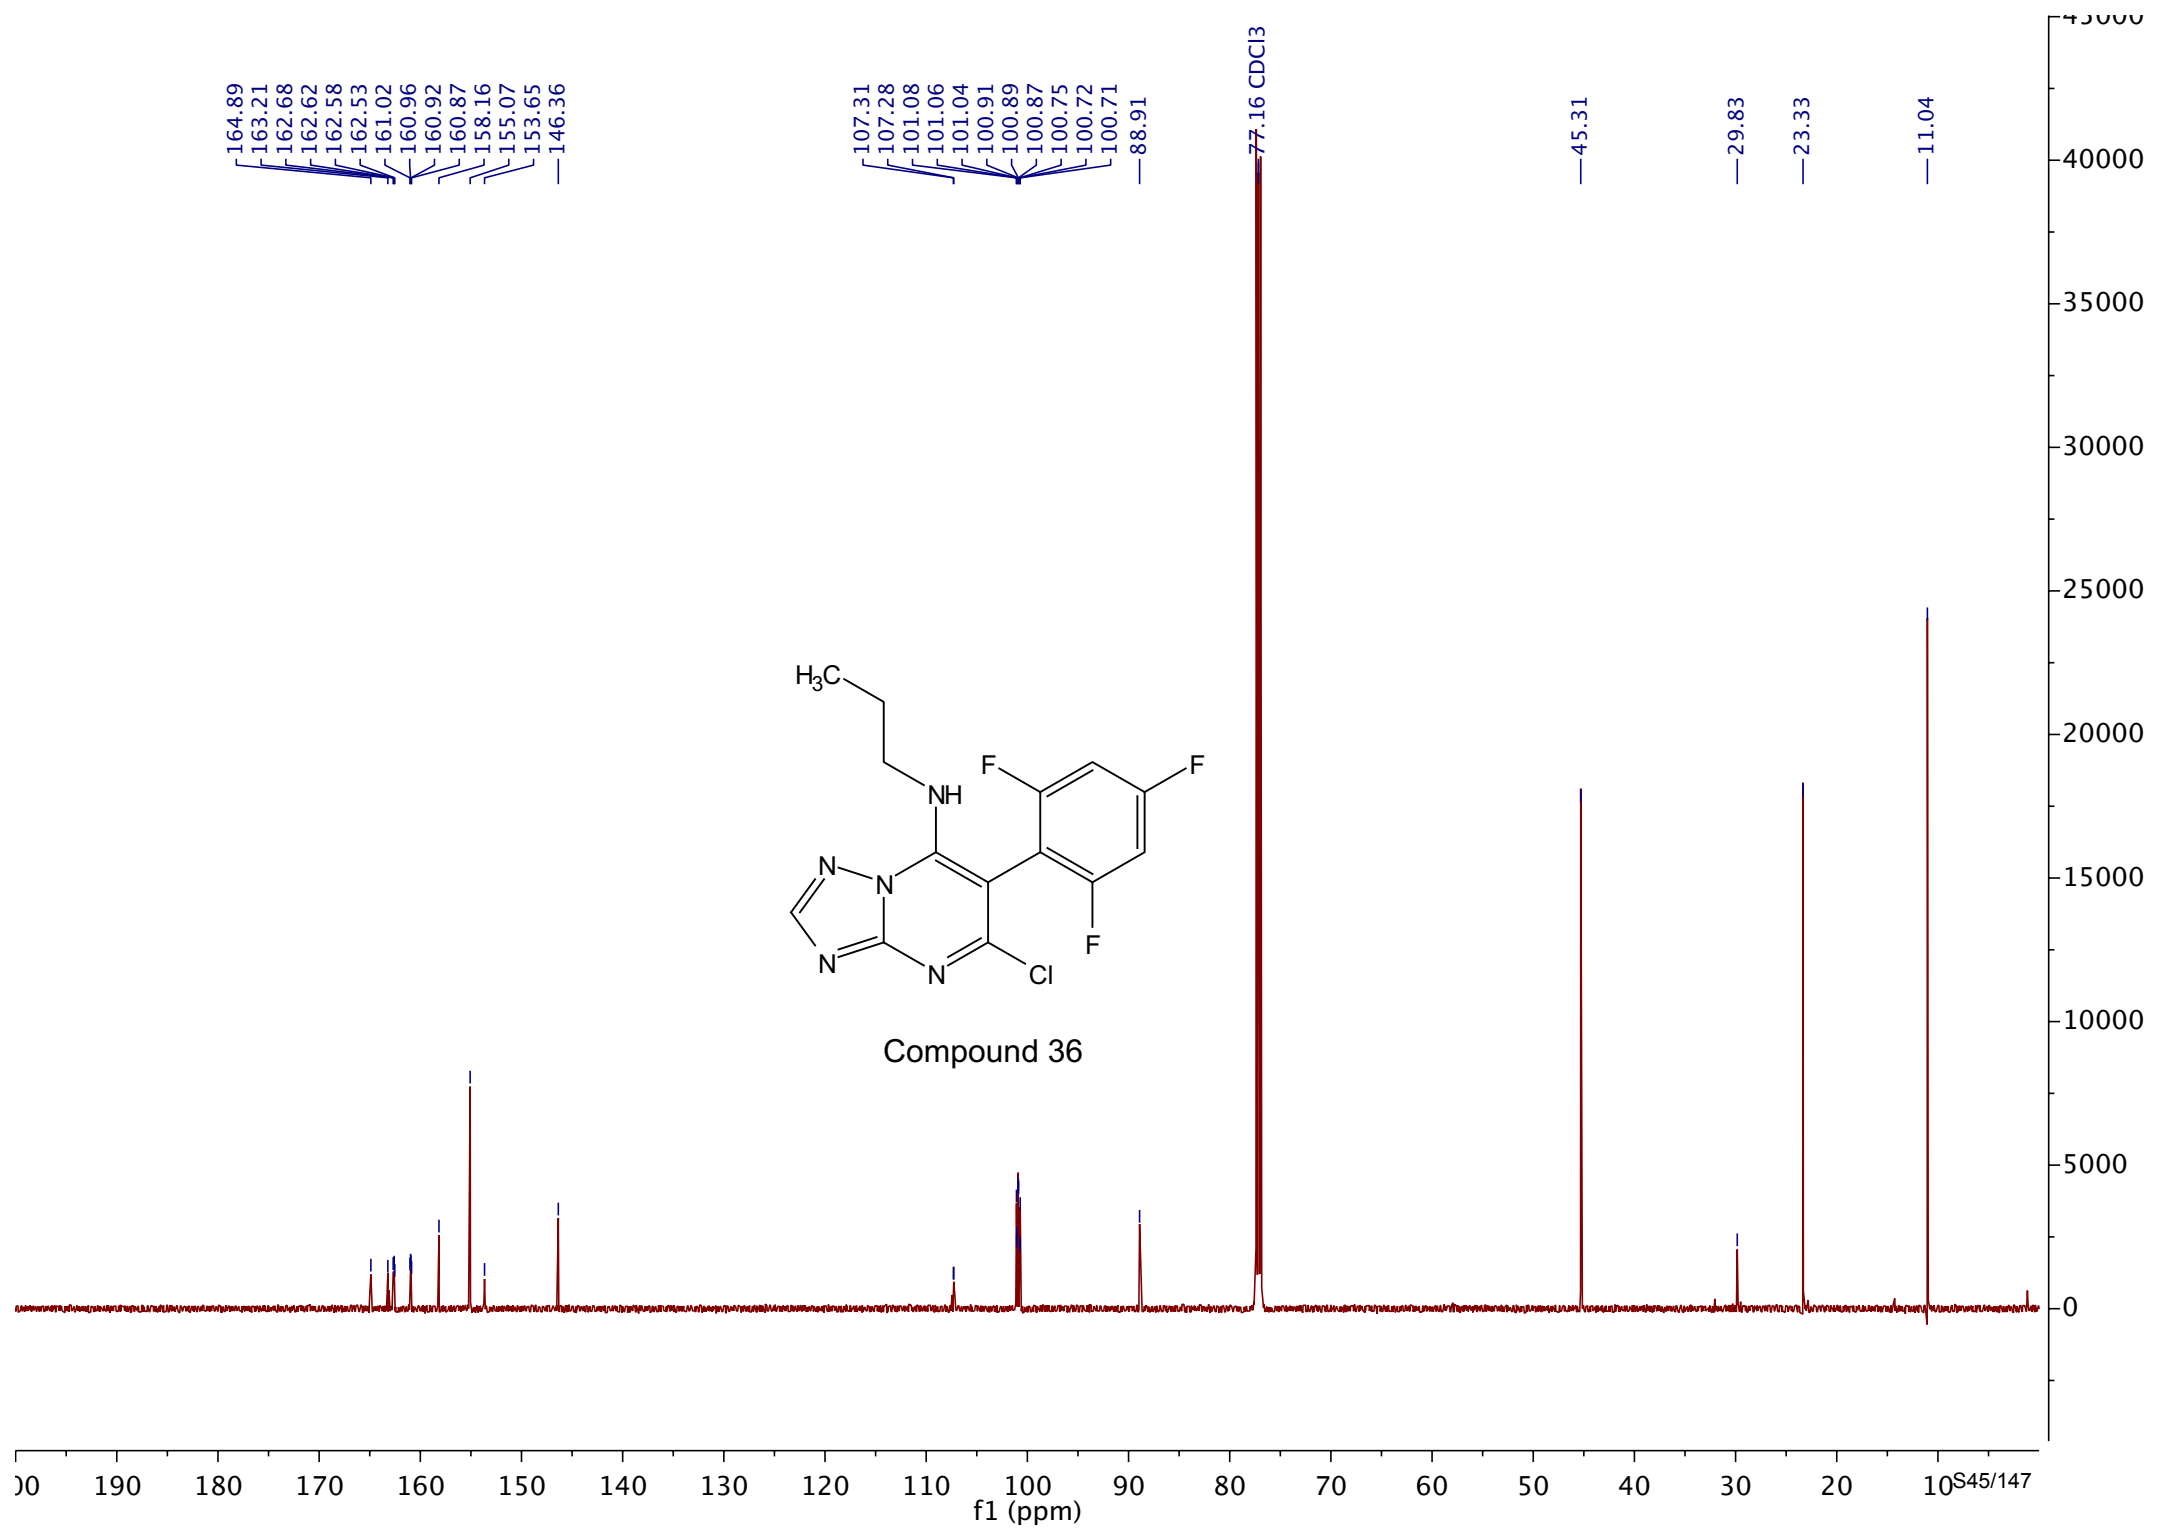

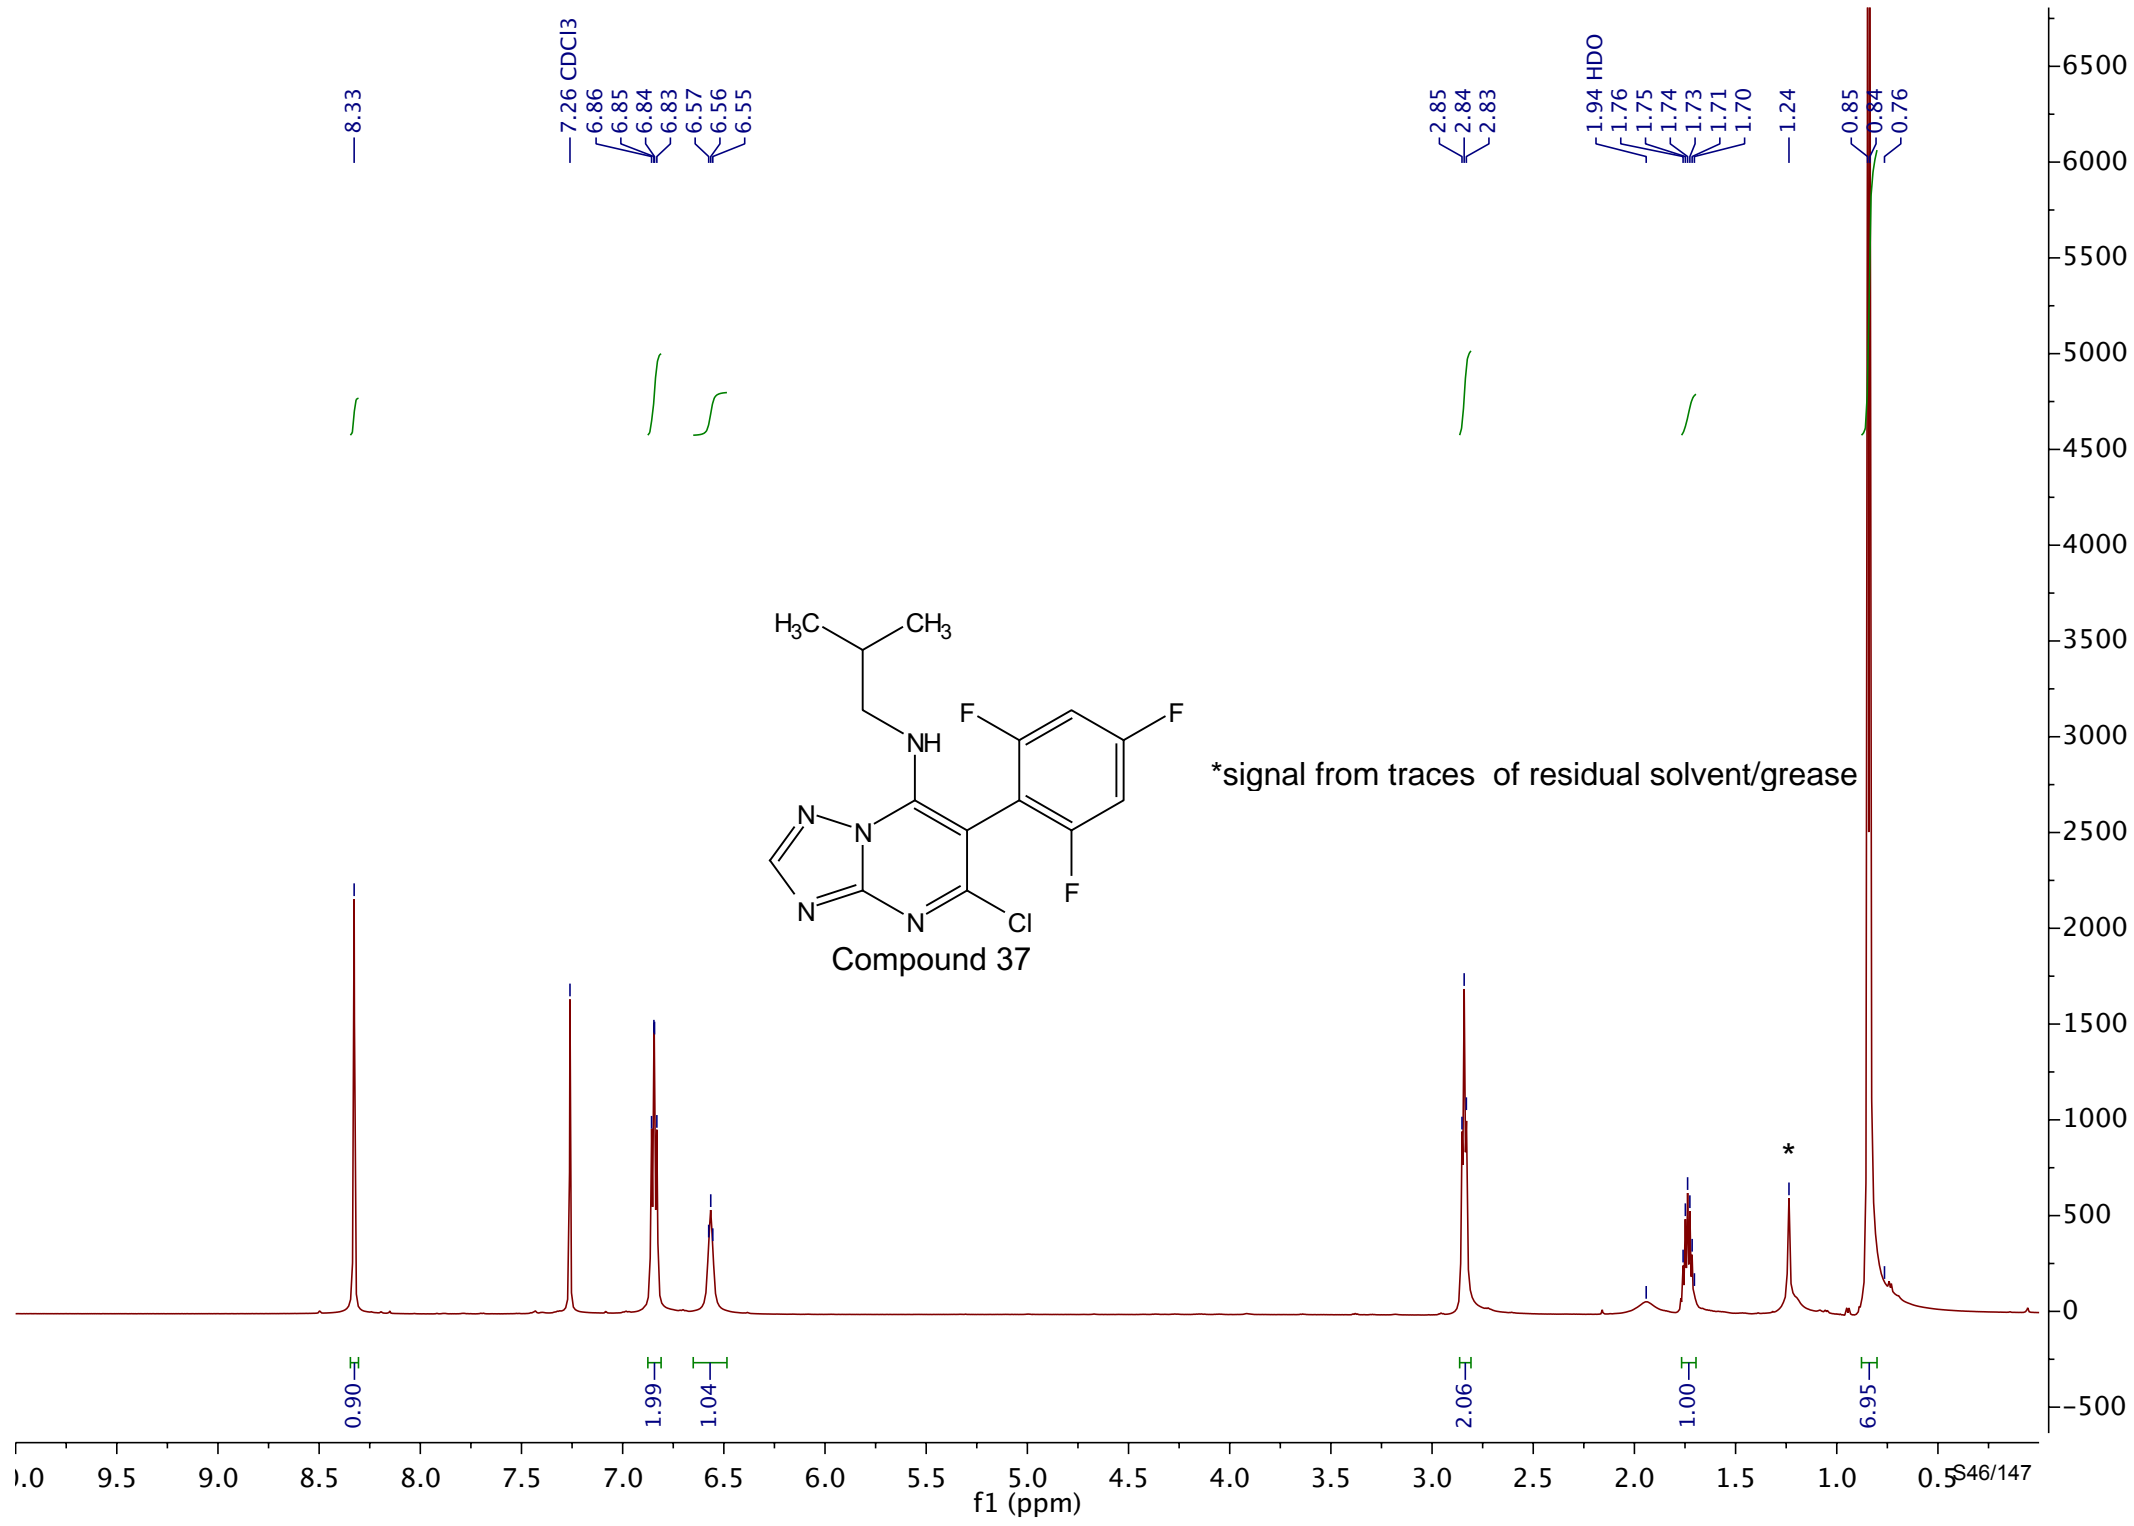

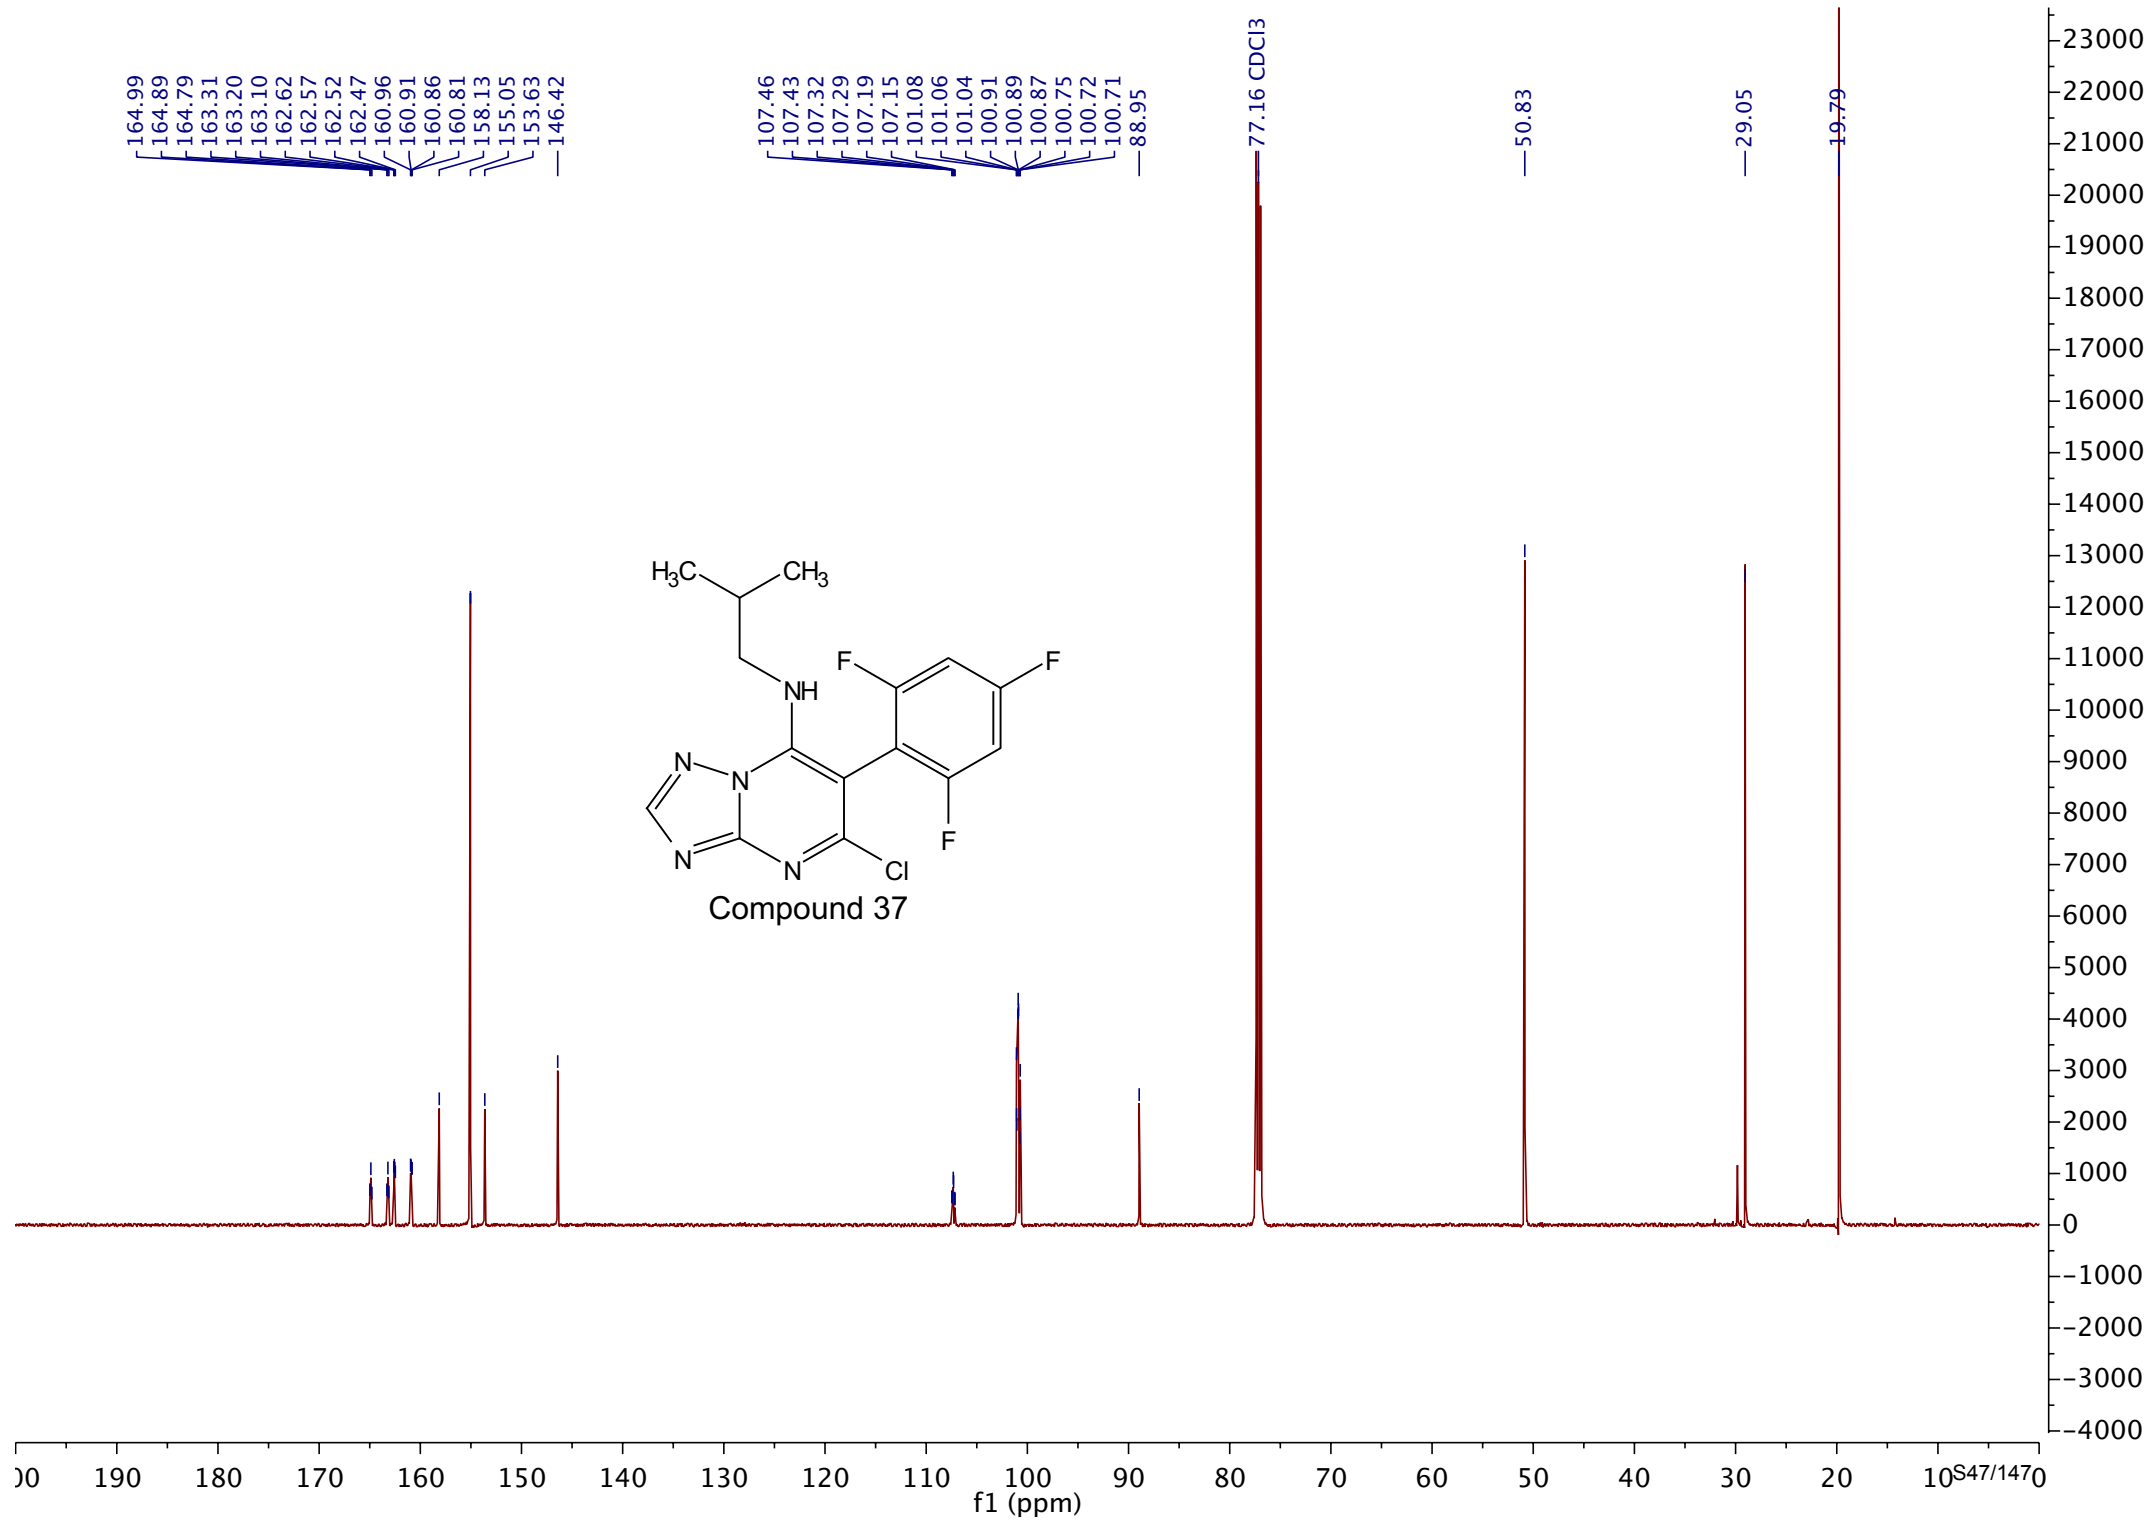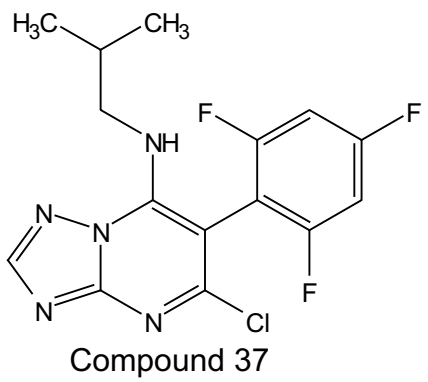



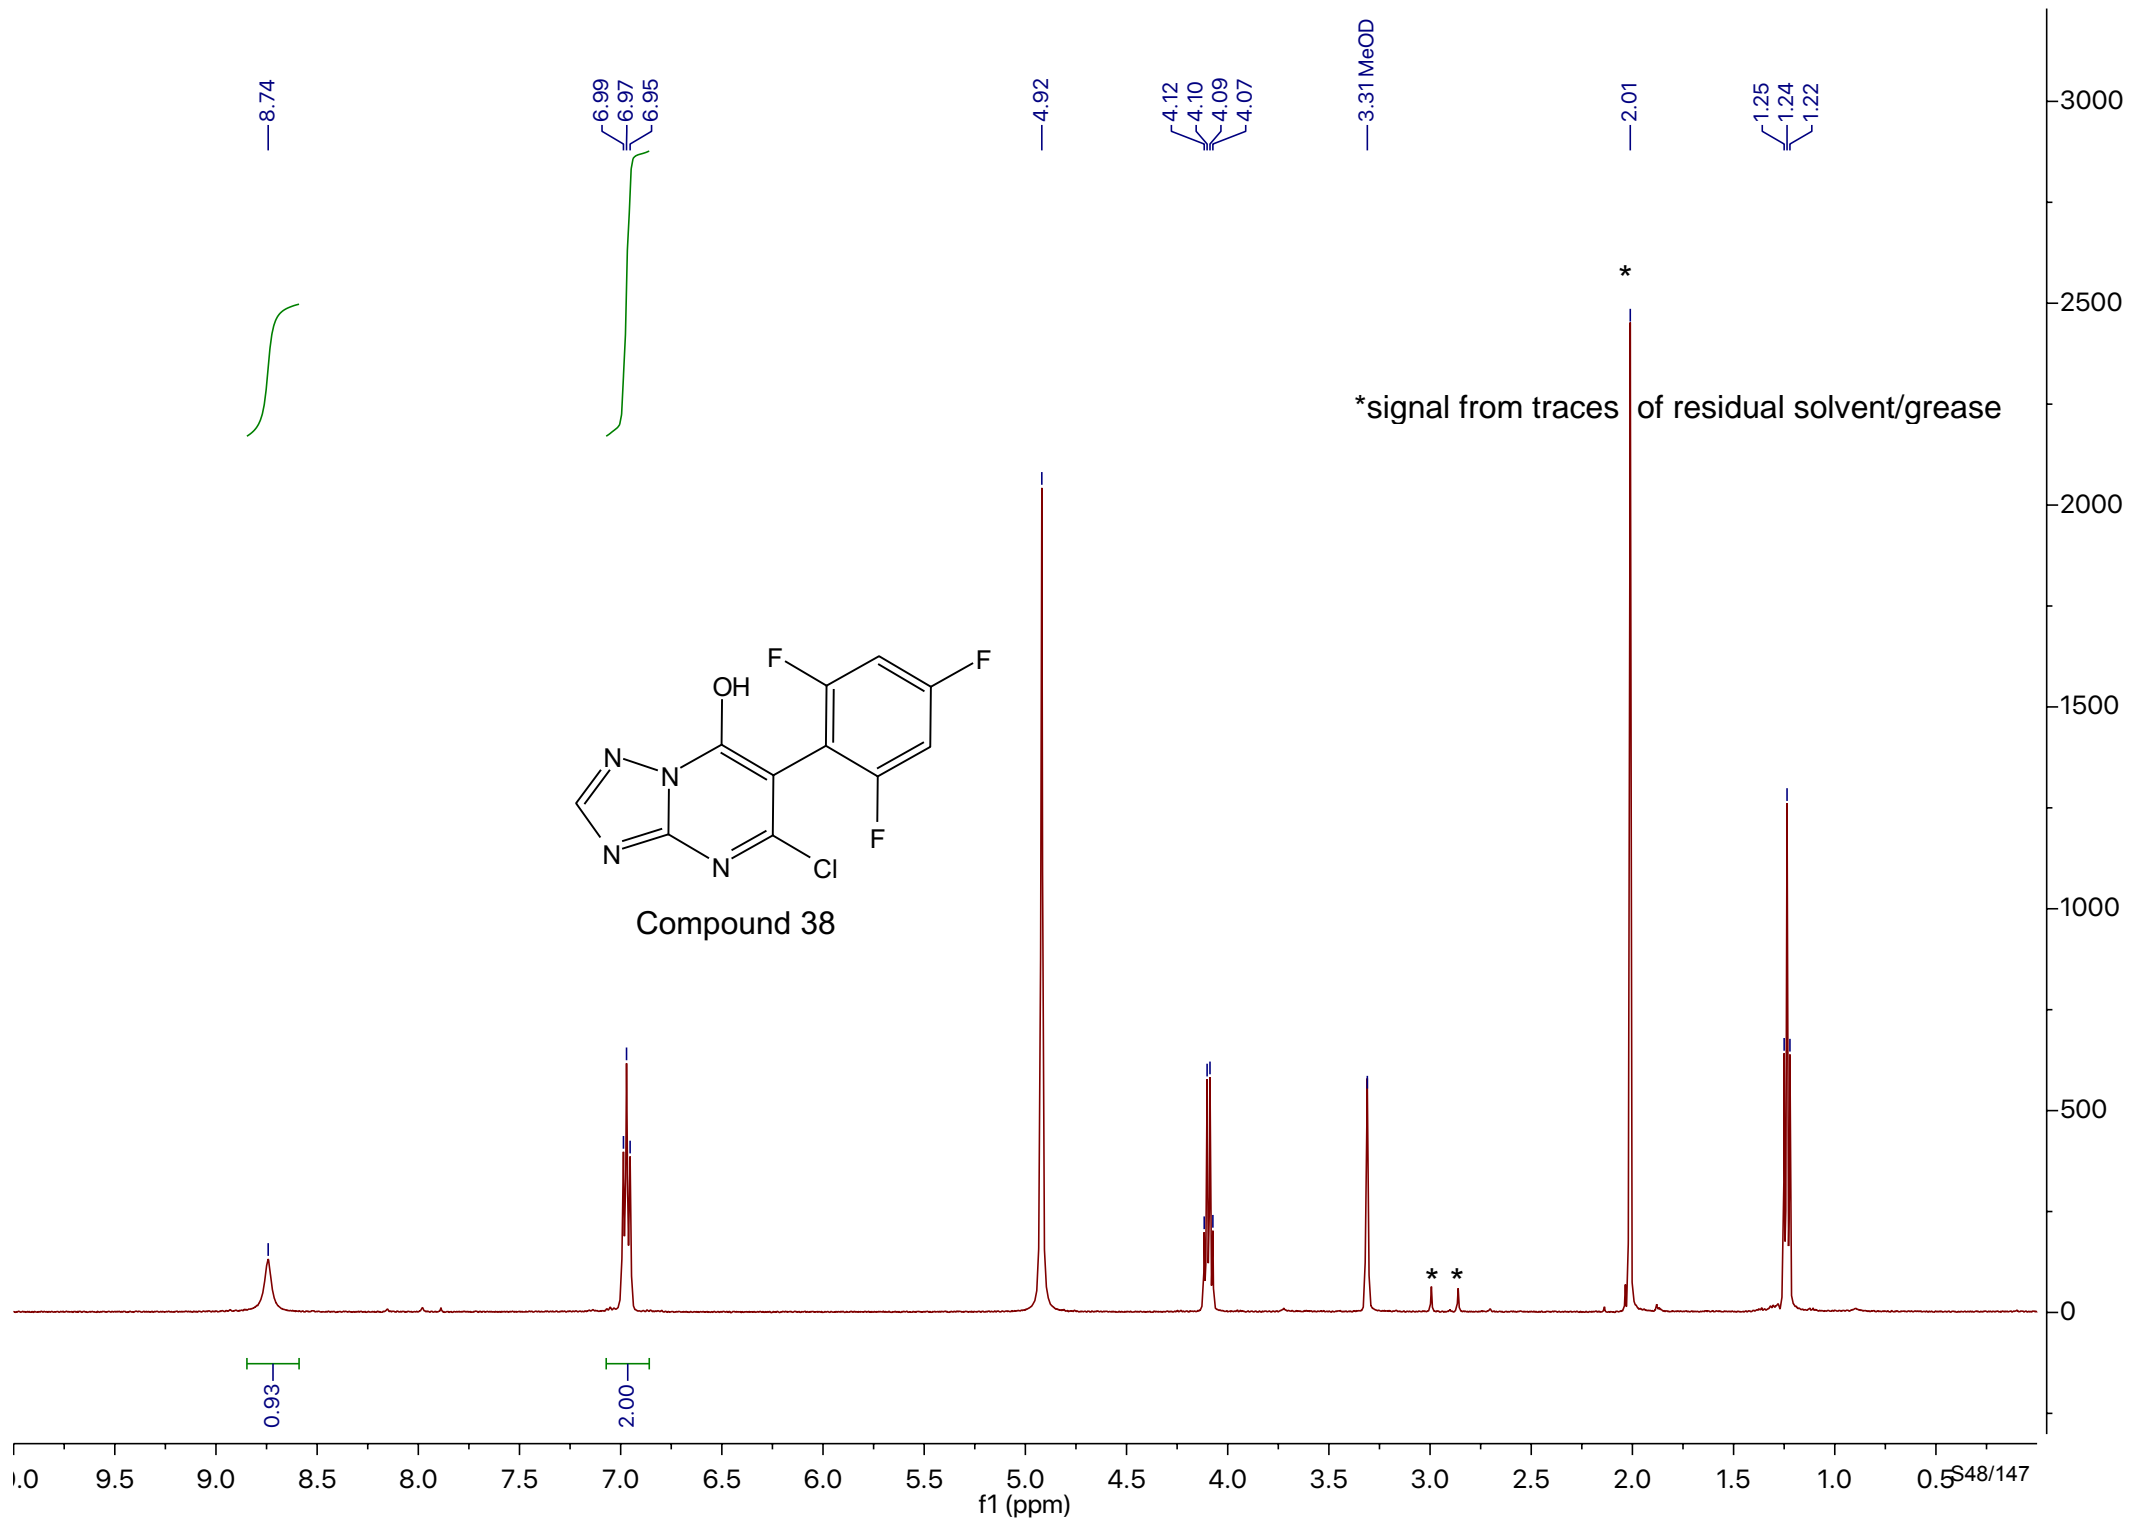

165.92  
165.78  
165.65  
163.92  
163.86  
163.79  
163.74  
163.67  
163.67  
161.89  
161.81  
161.76  
161.69  
159.41  
156.63

108.94  
108.90  
108.77  
108.74  
108.61  
108.57  
102.67  
101.52  
101.50  
101.46  
101.34  
101.32  
101.30  
101.28  
101.25  
101.13  
101.09  
101.07

49.147

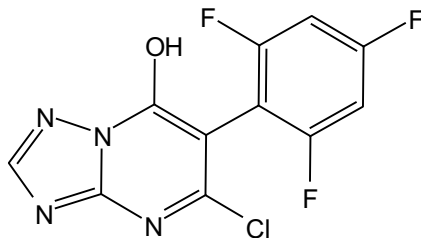

Compound 38

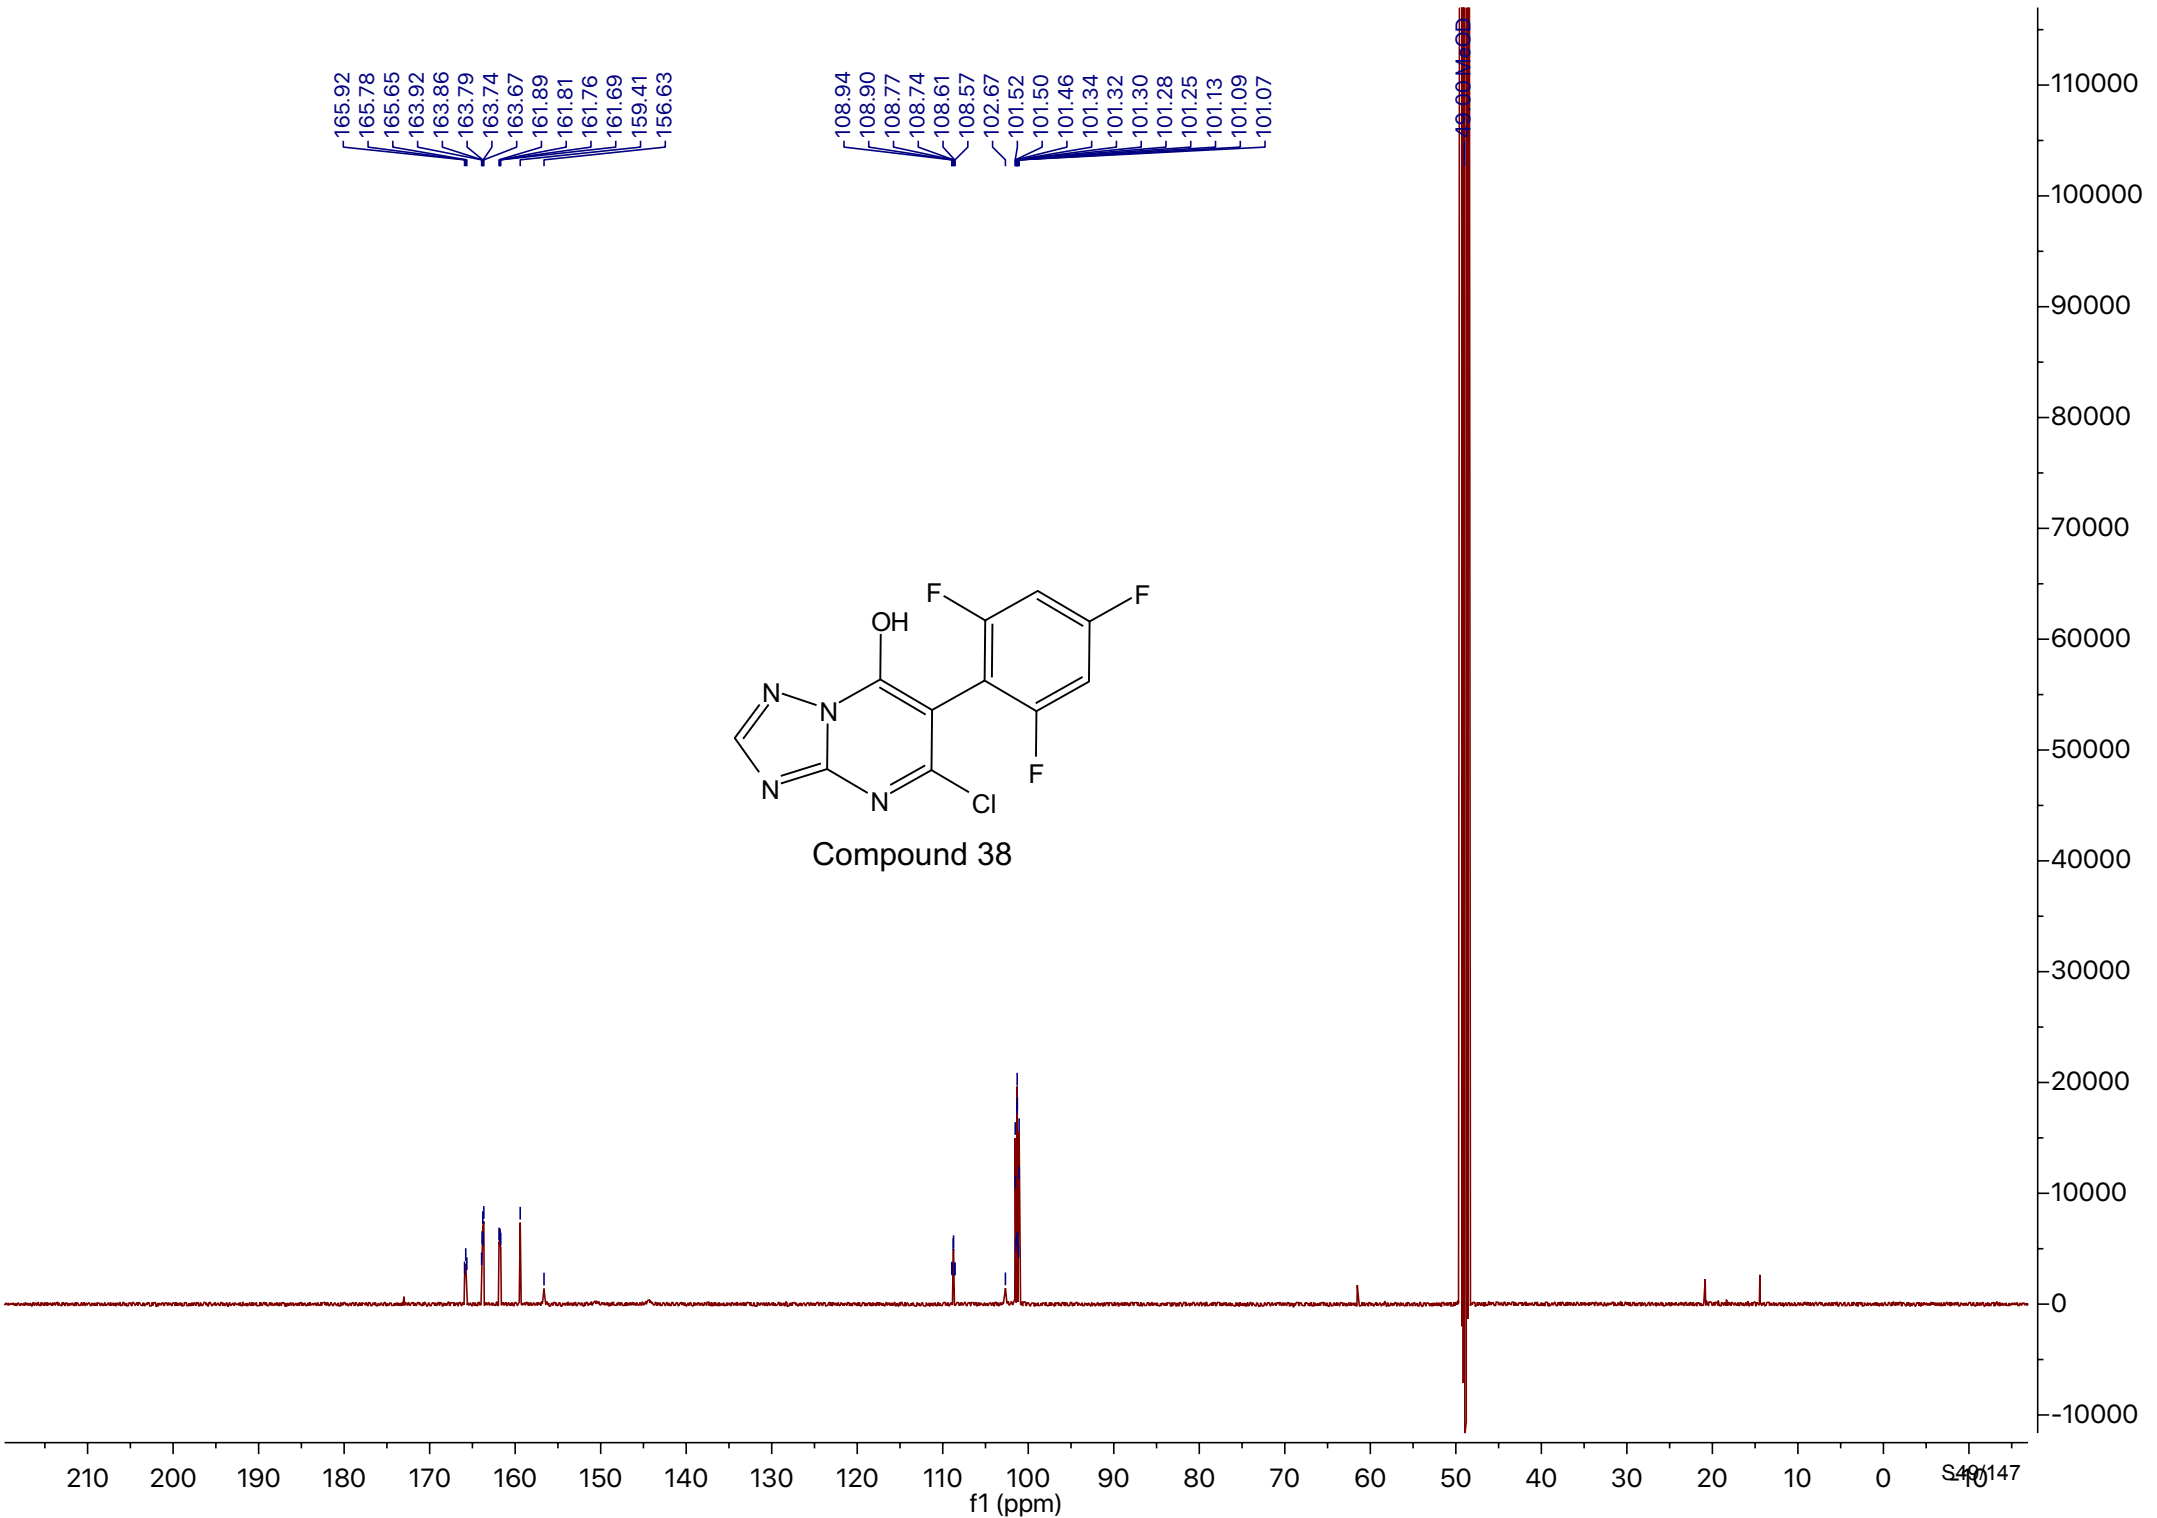

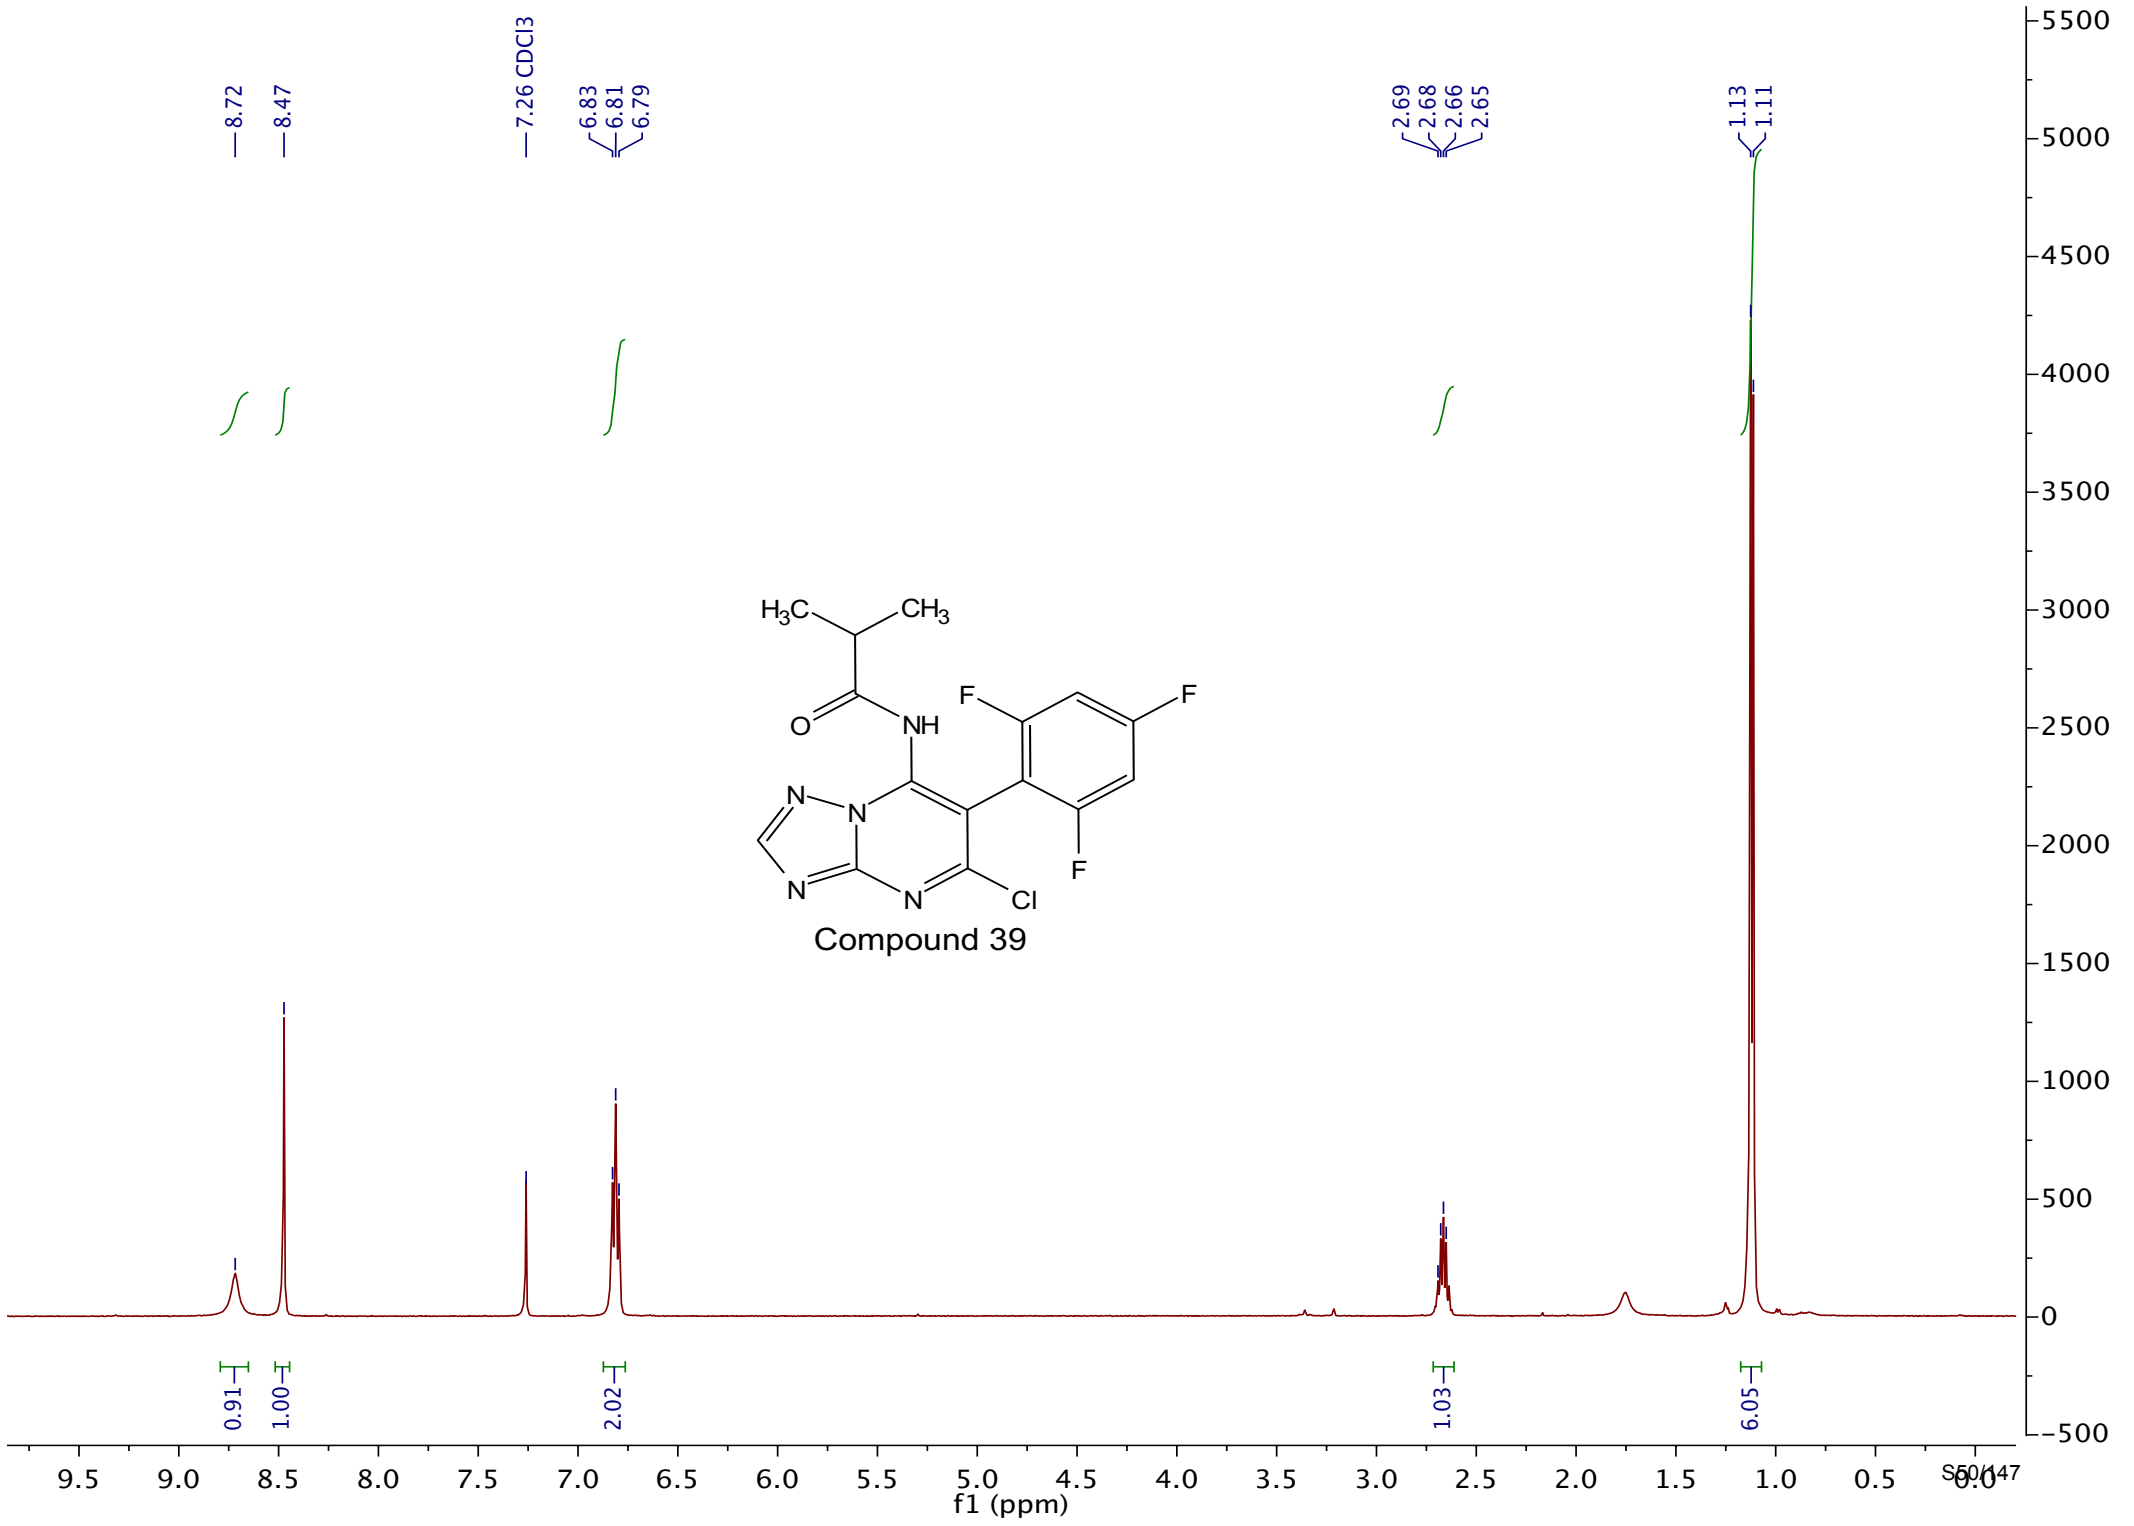

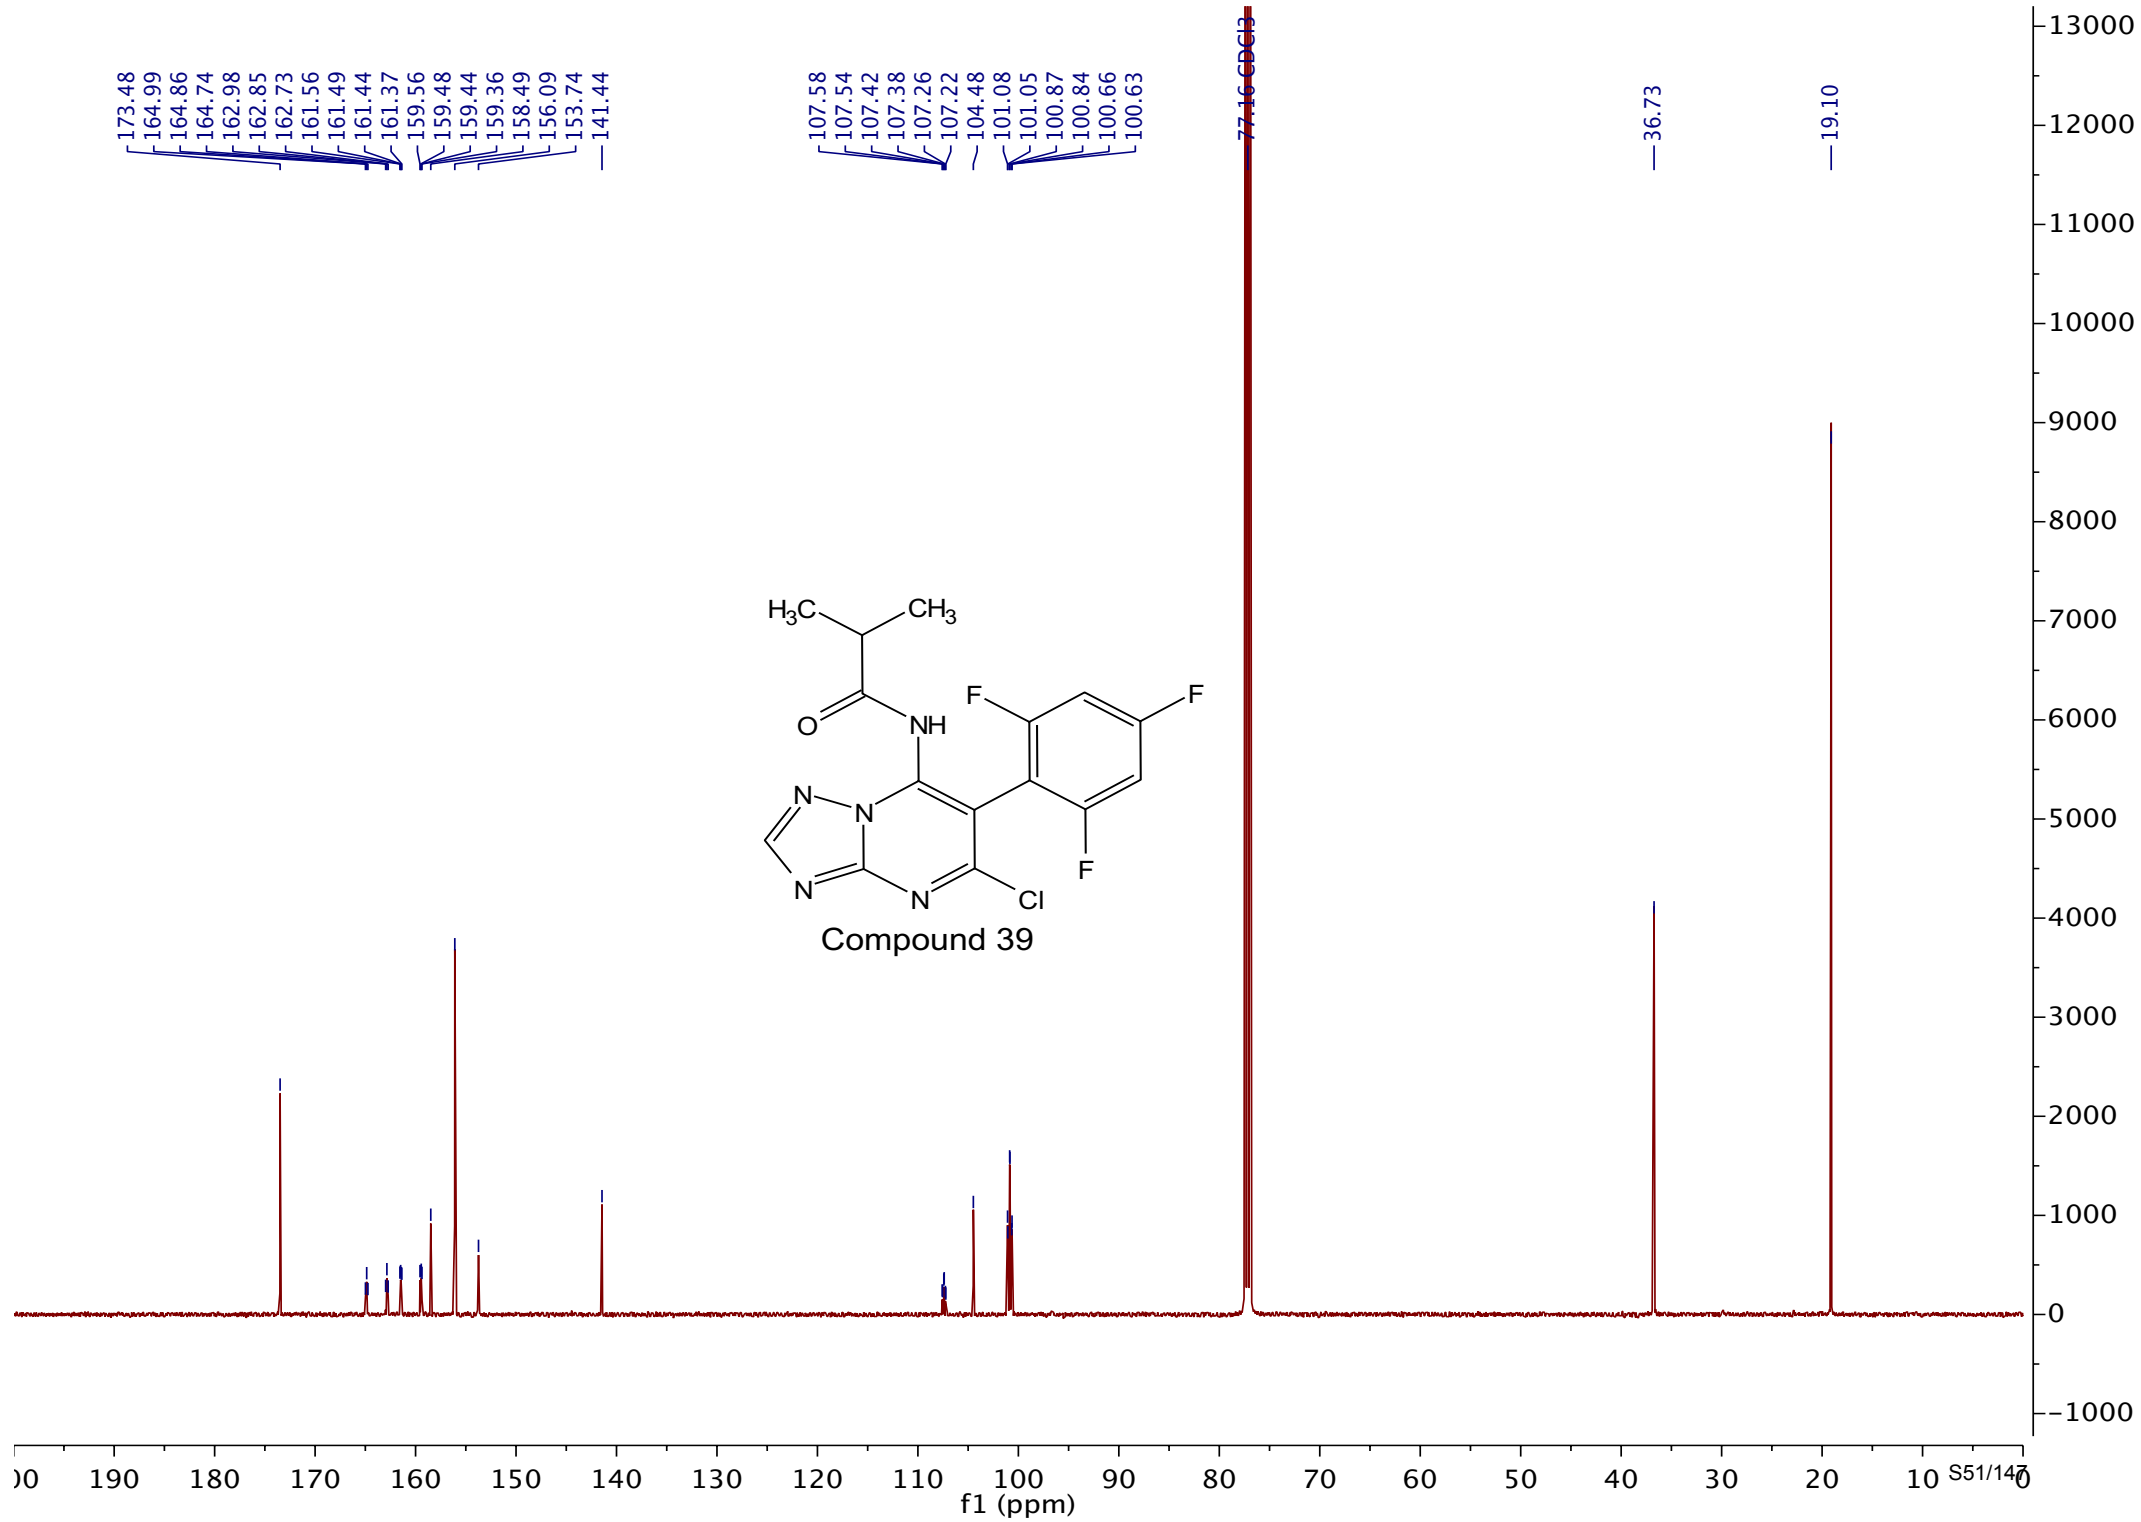

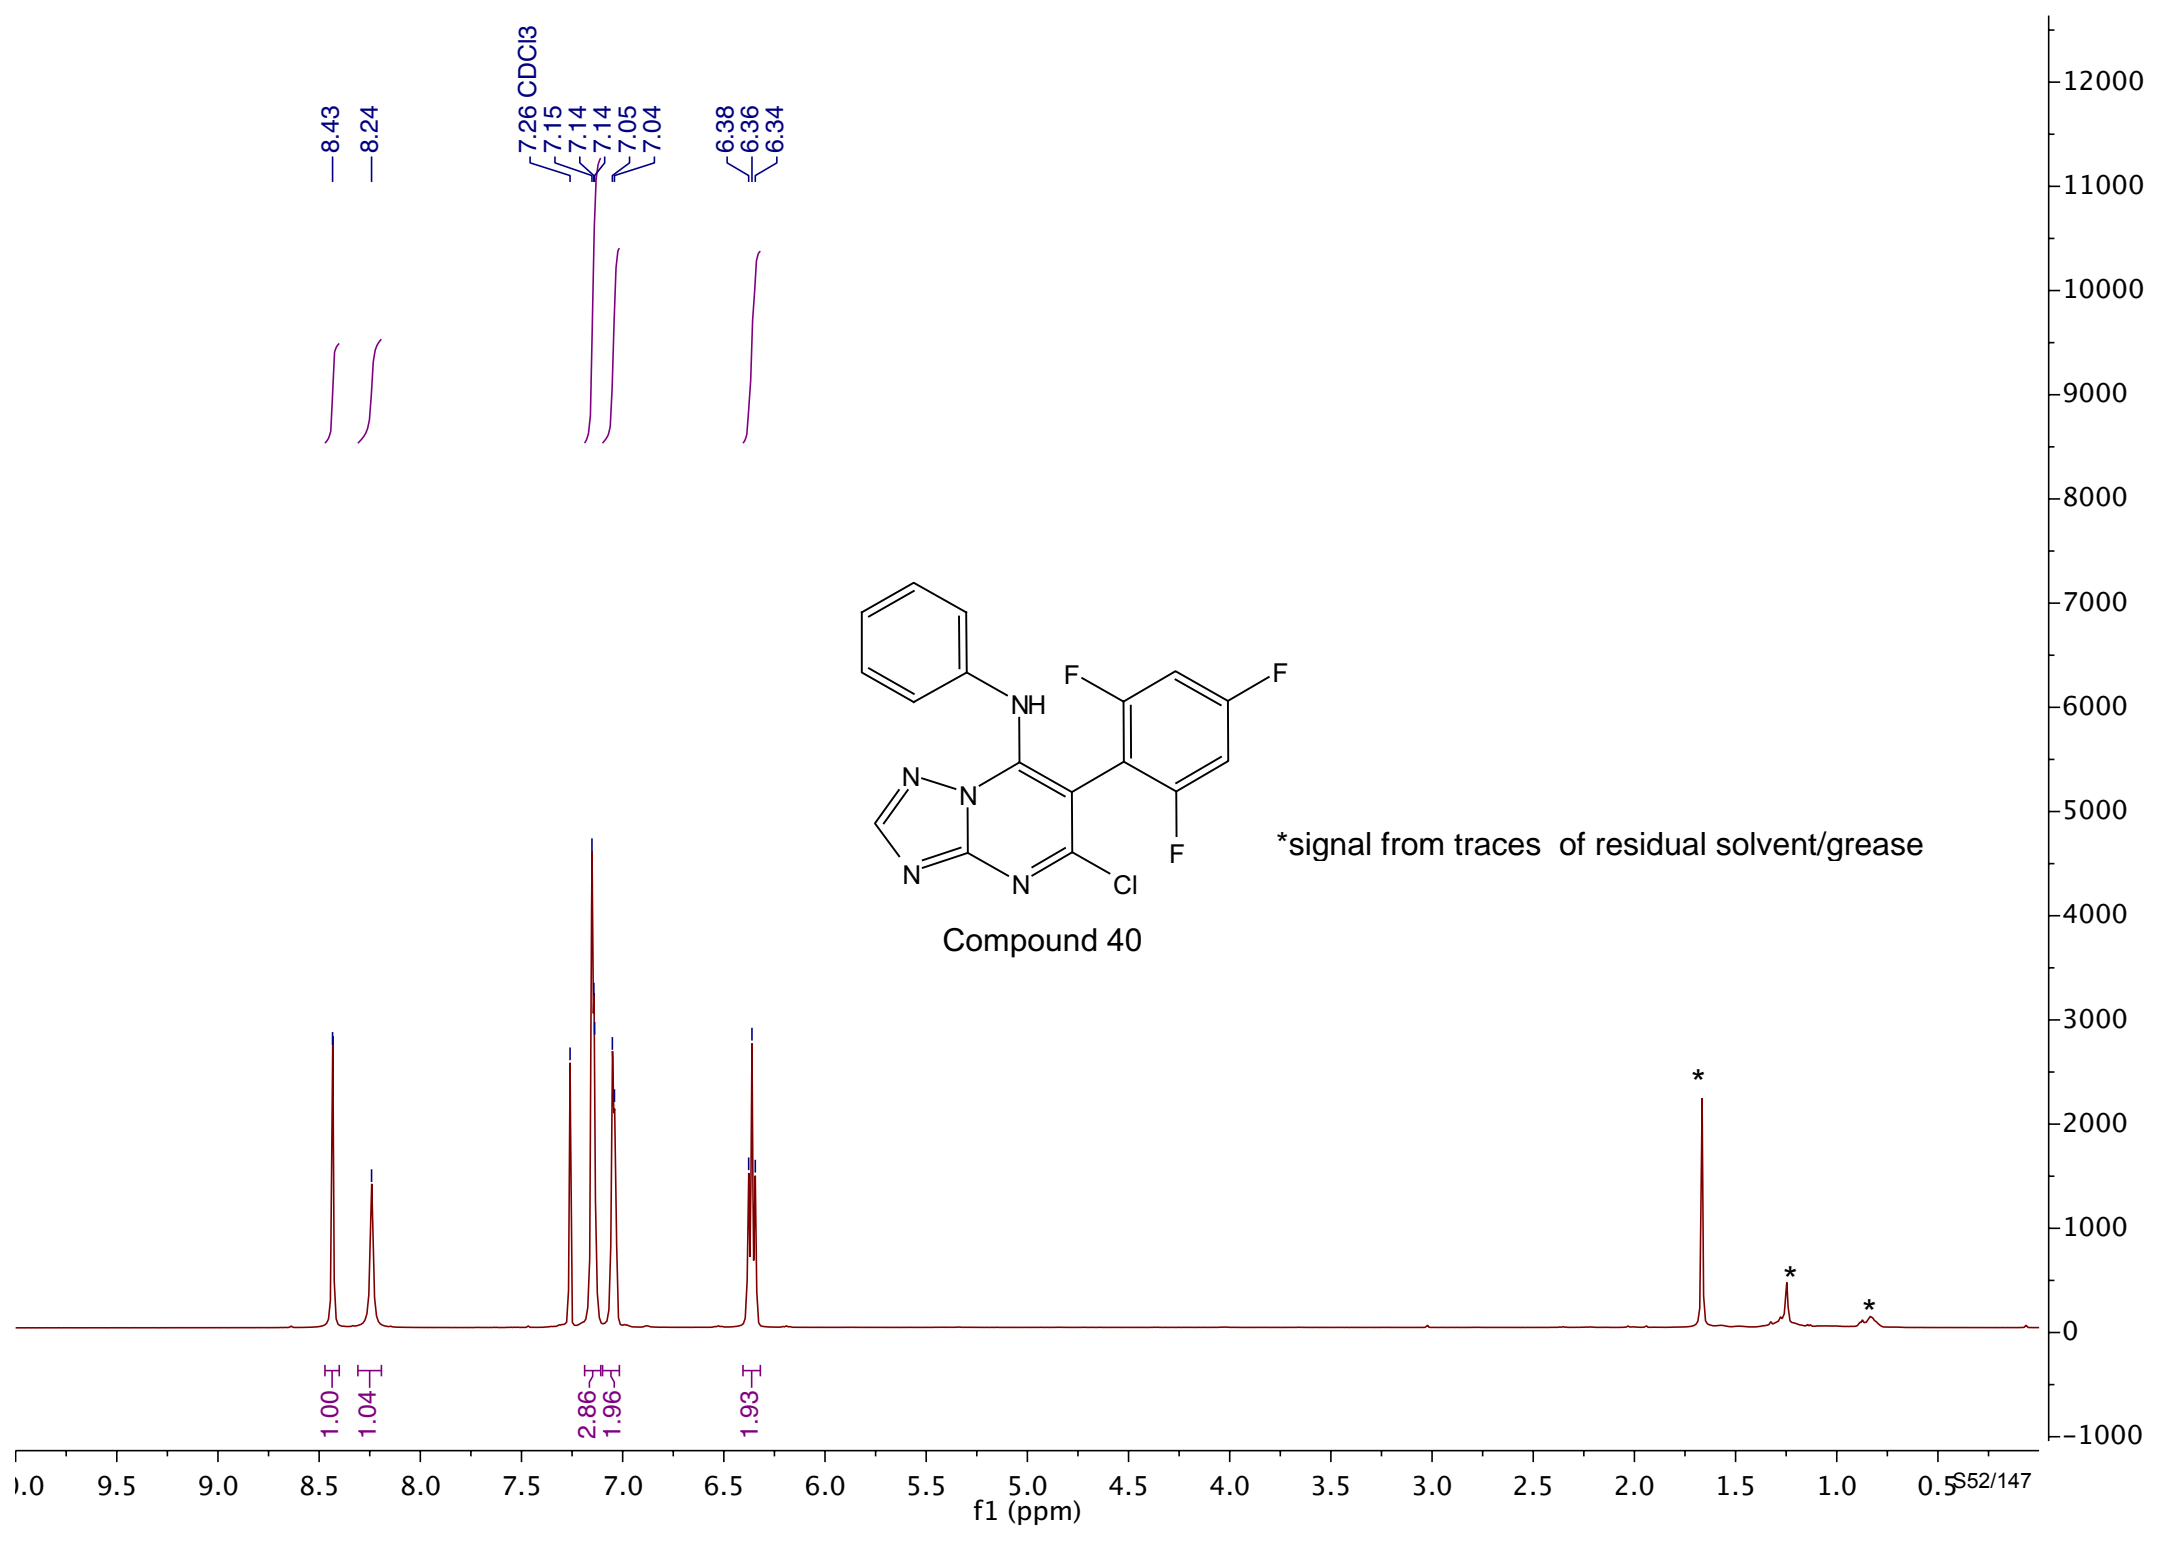

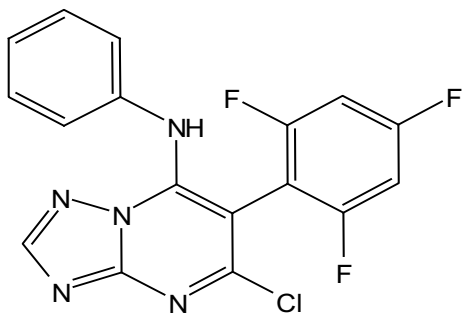

Compound 40

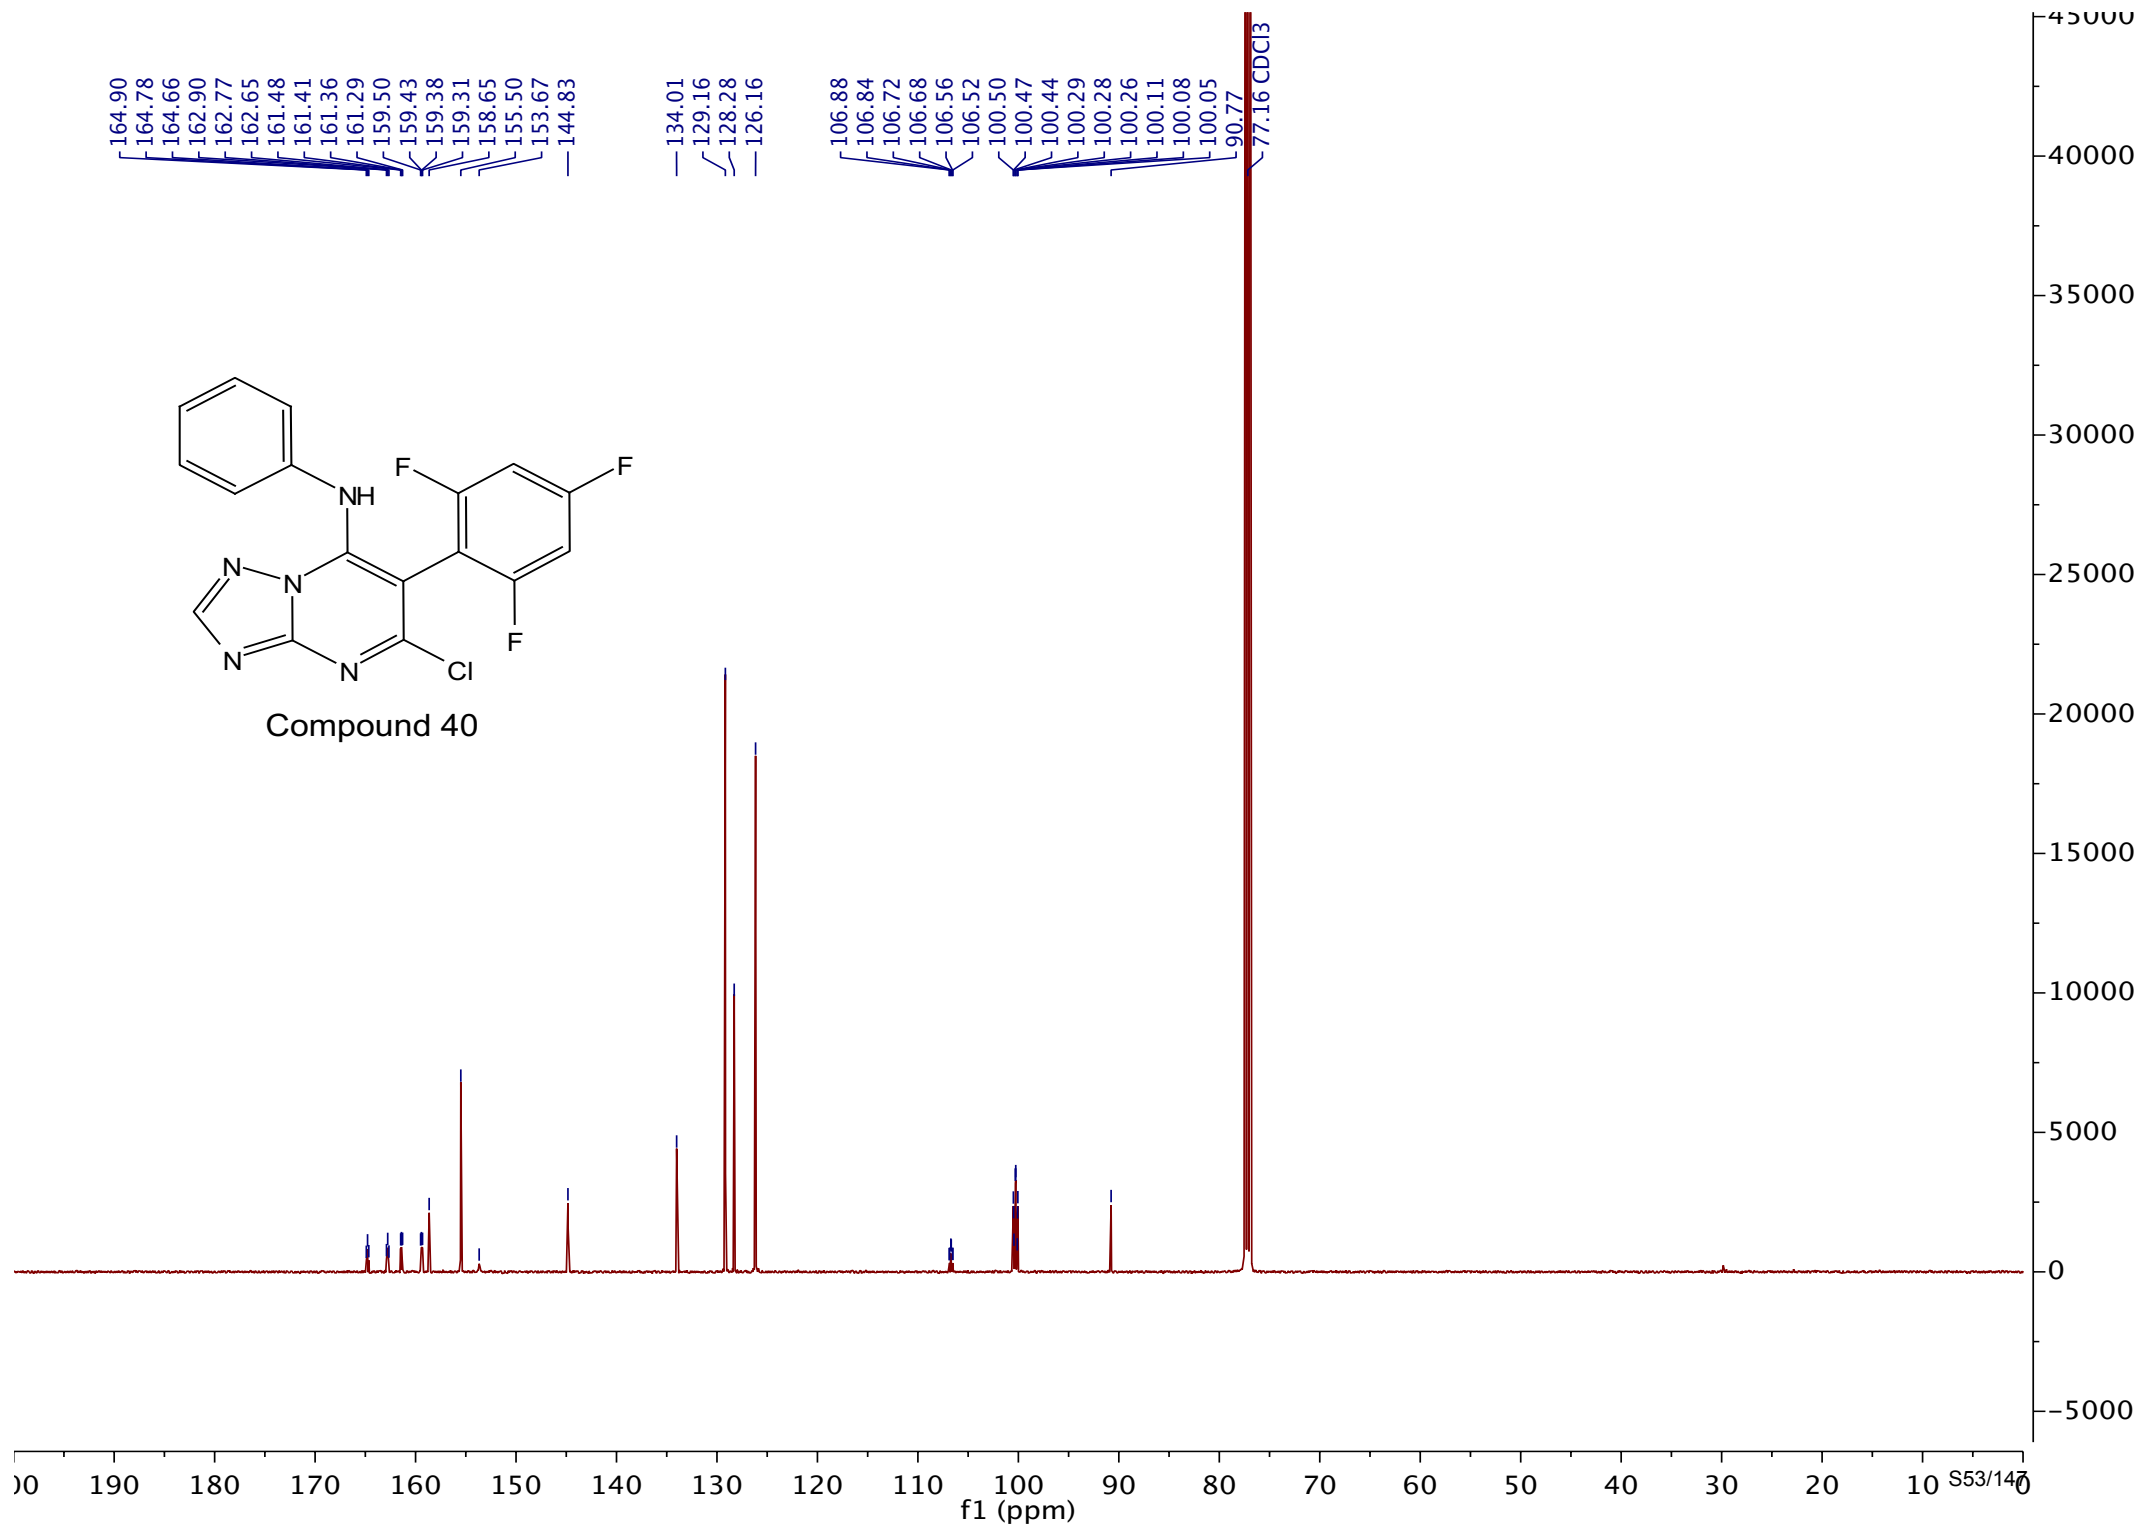

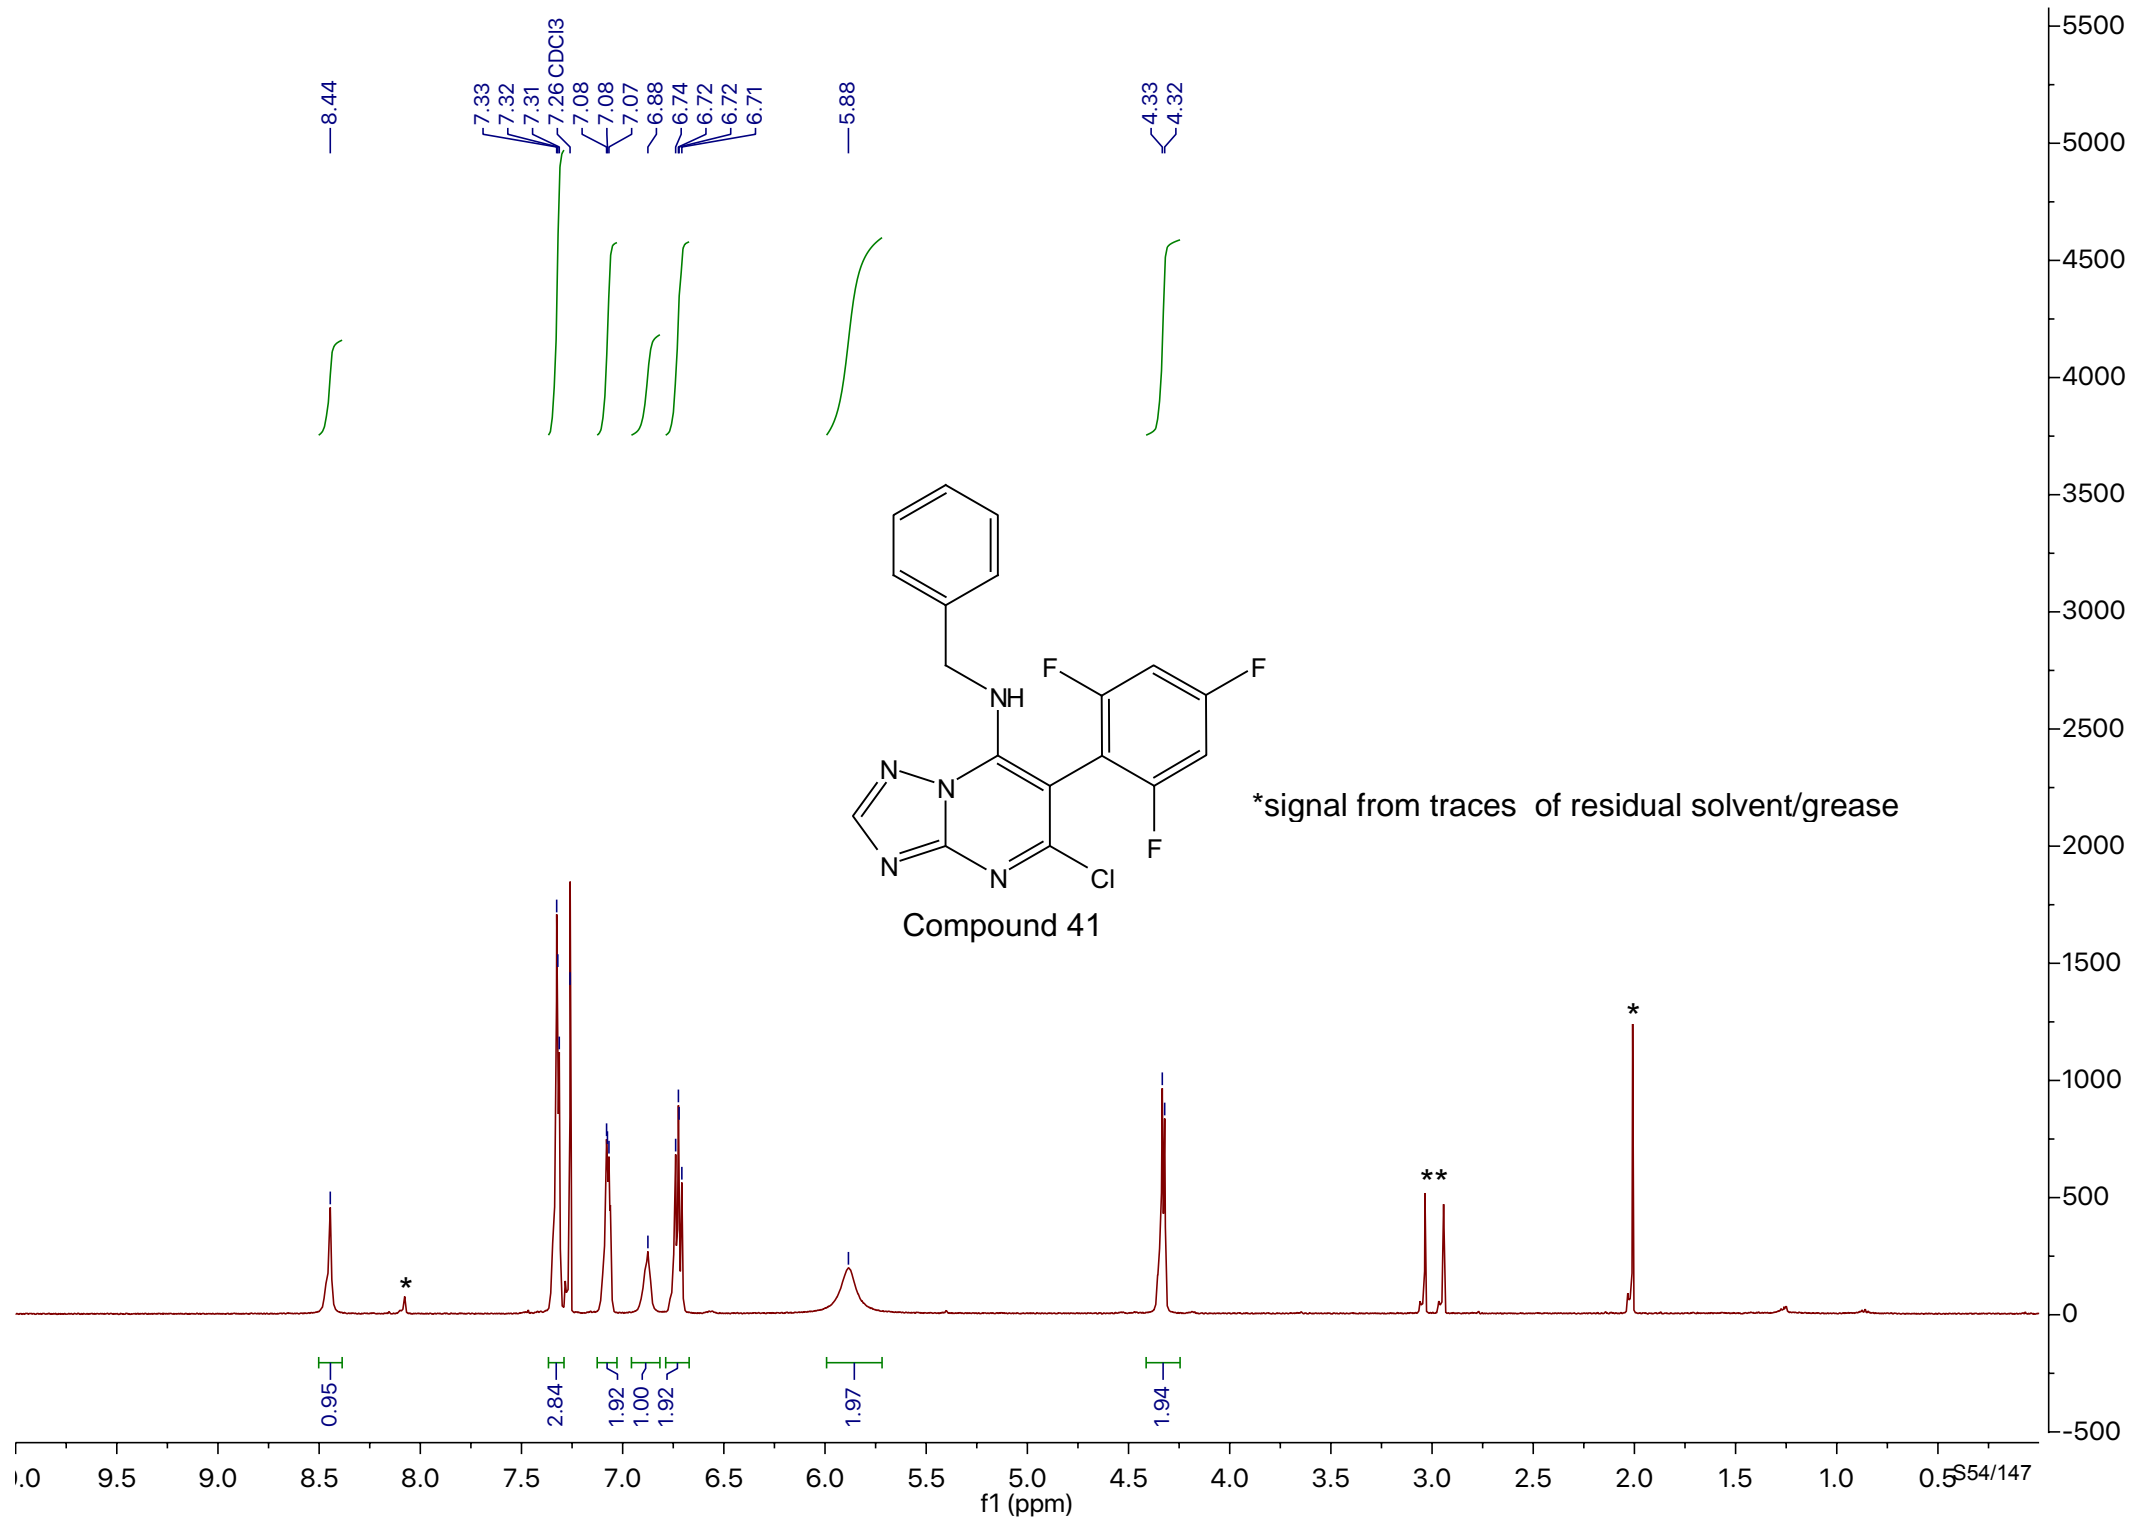

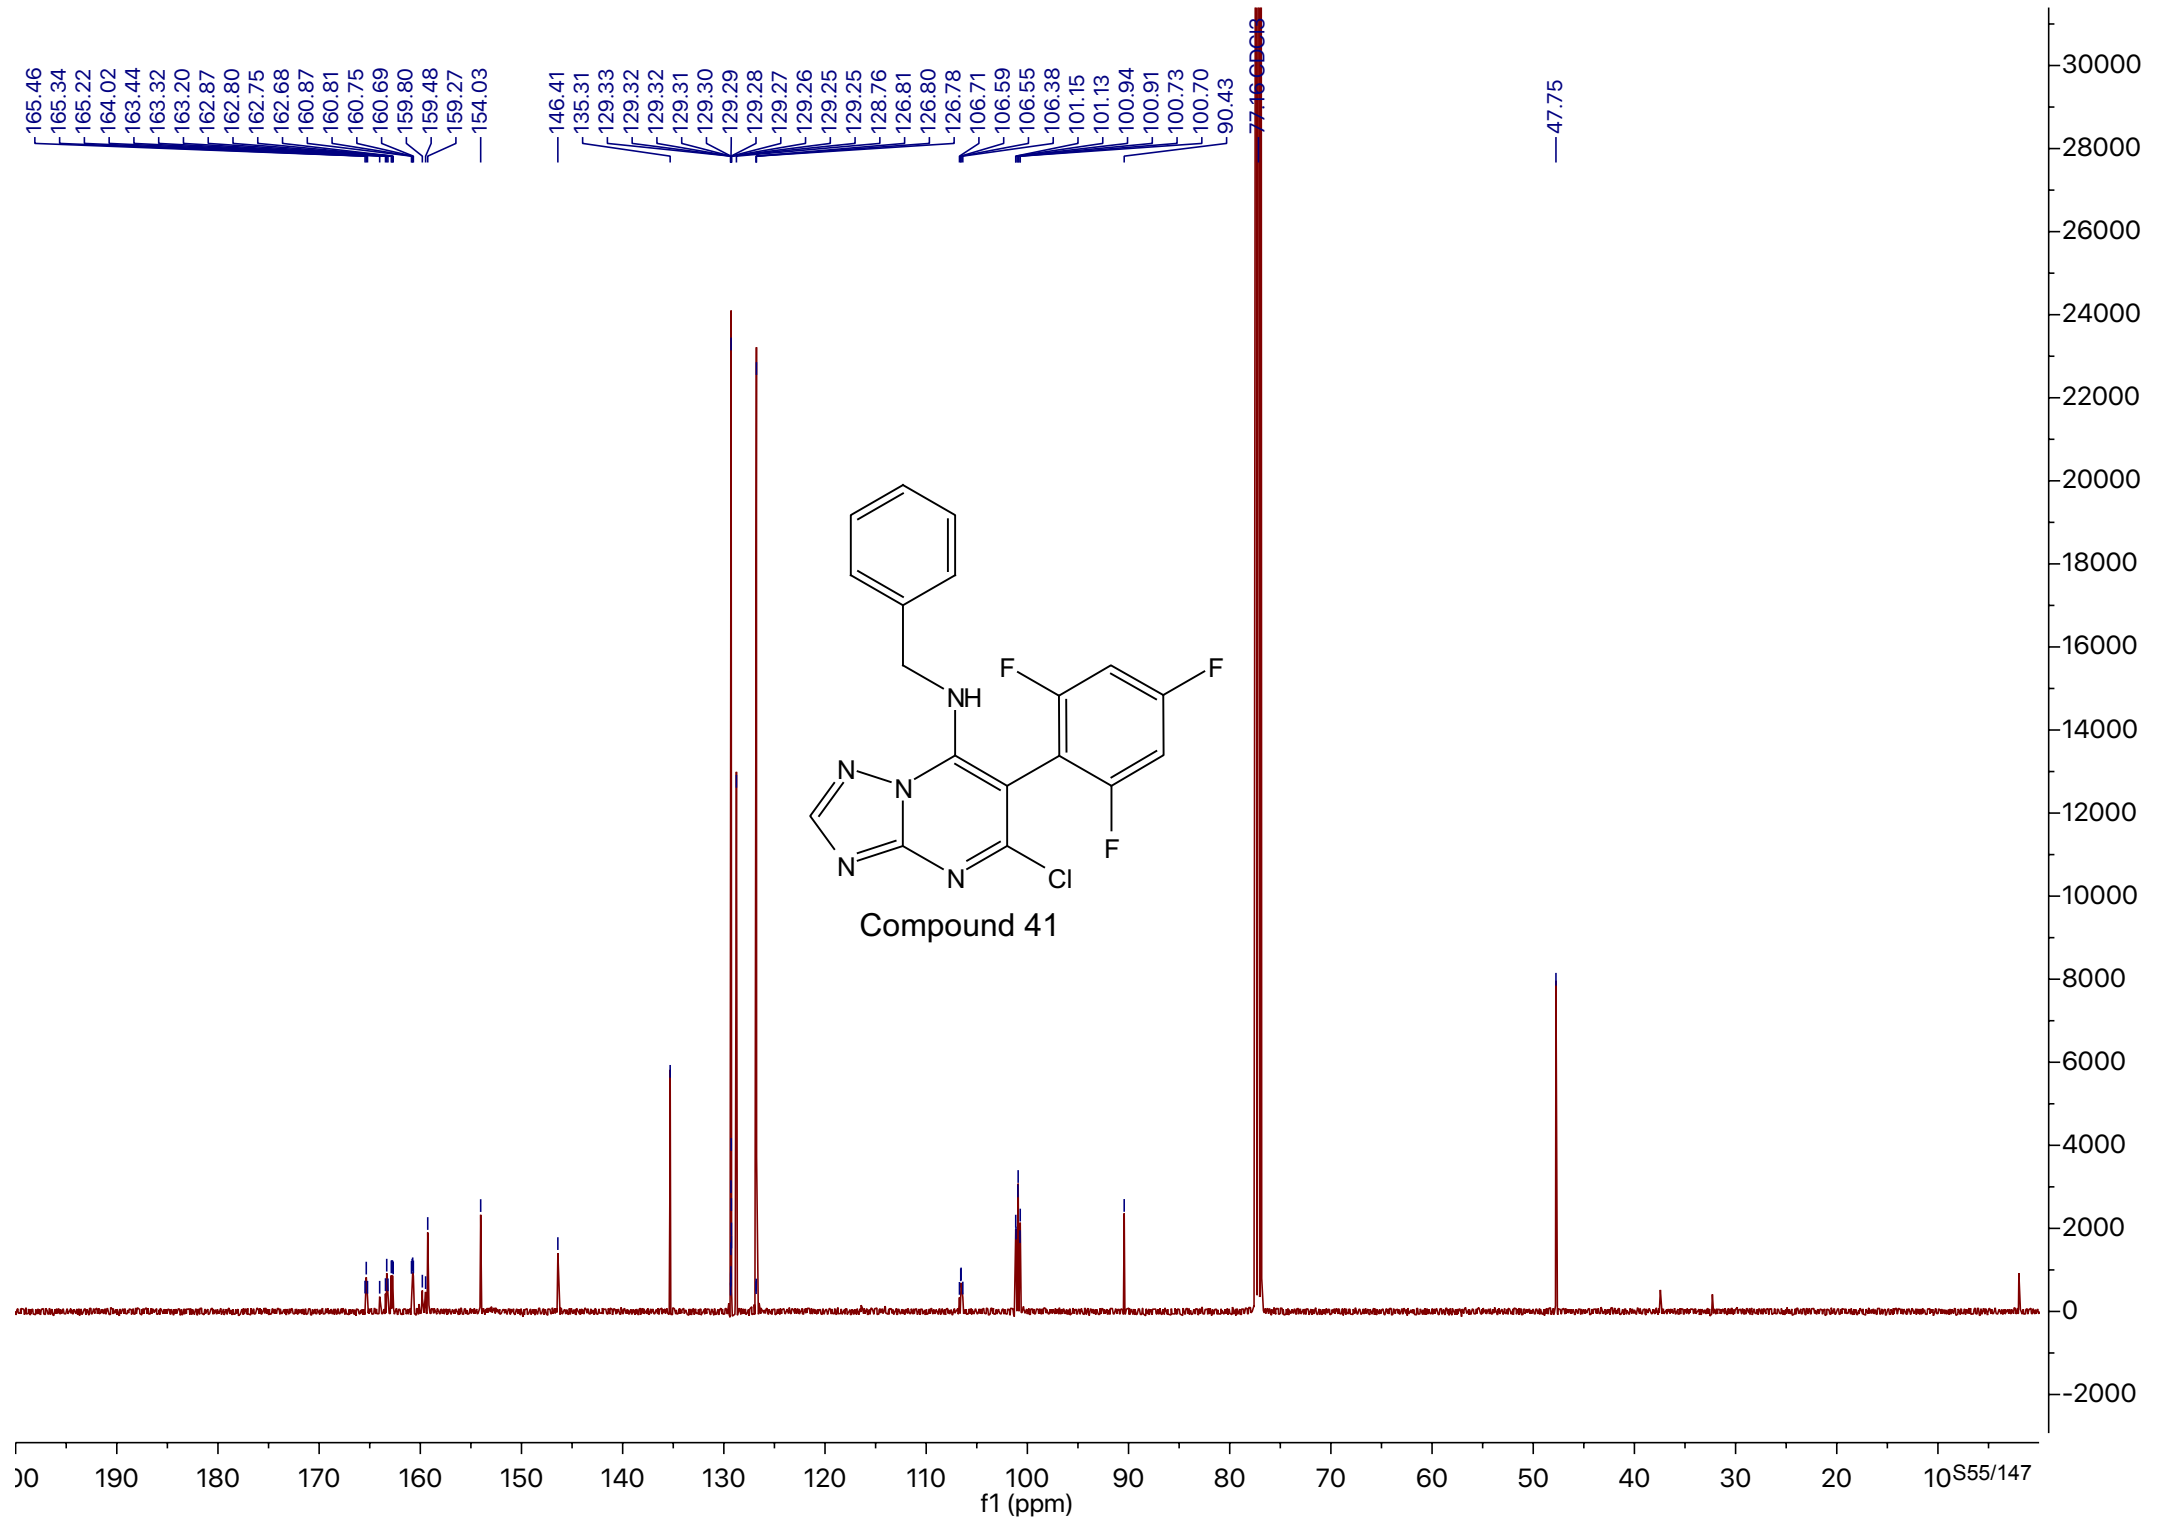



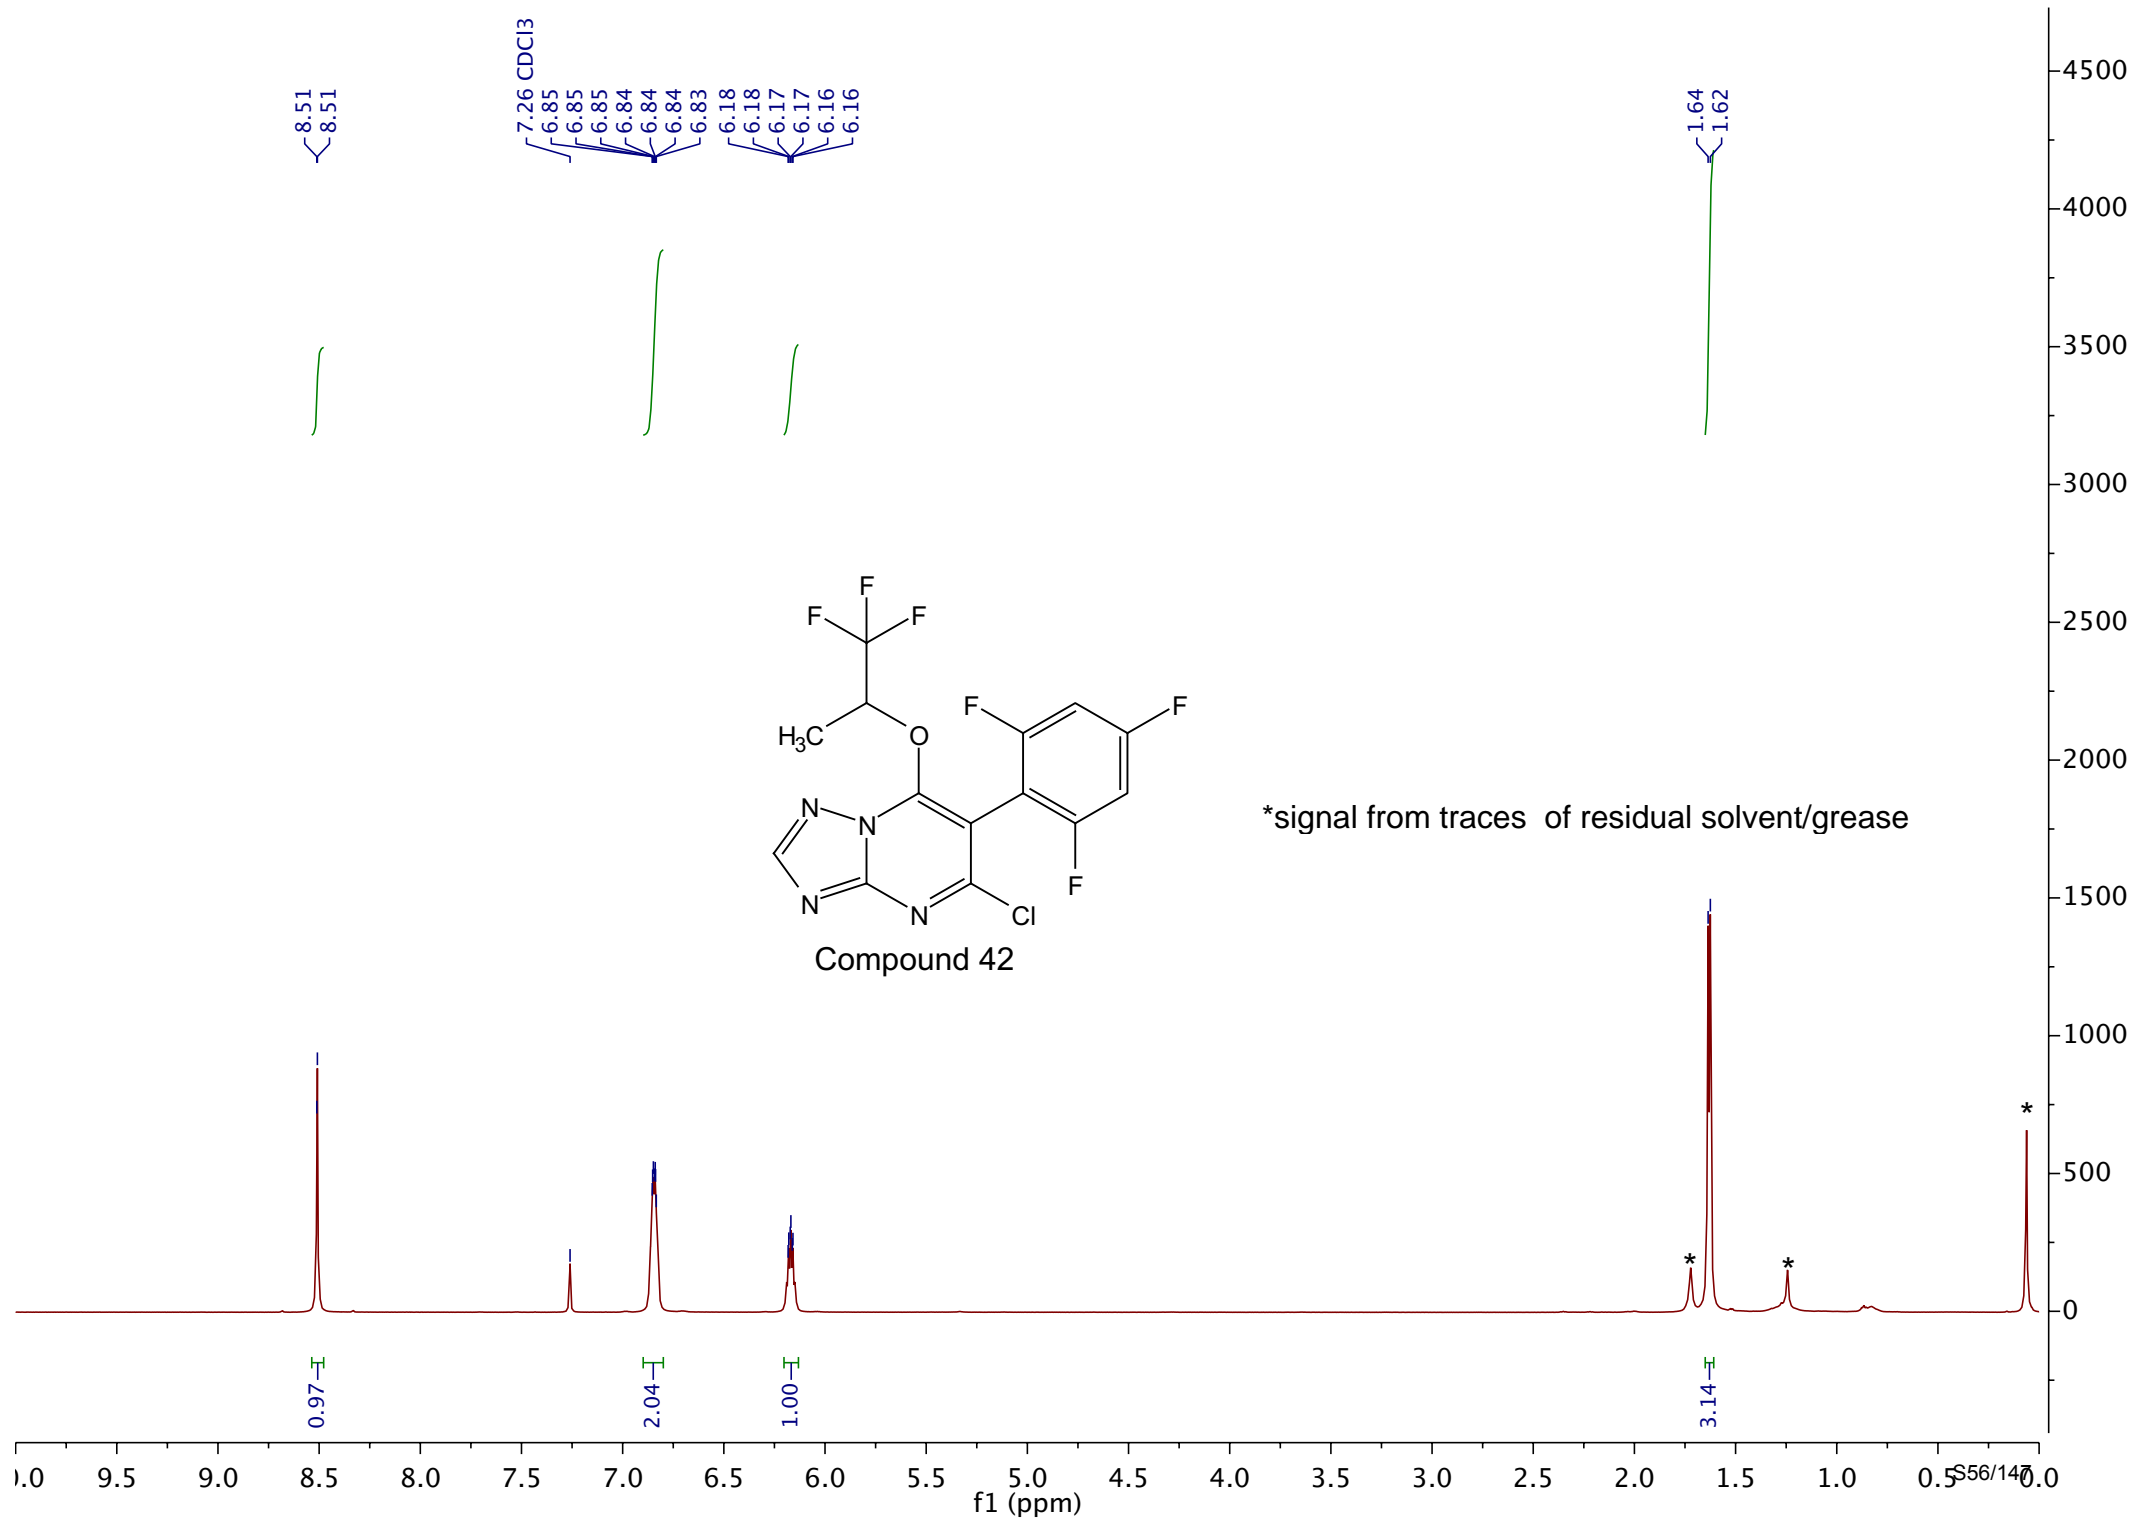

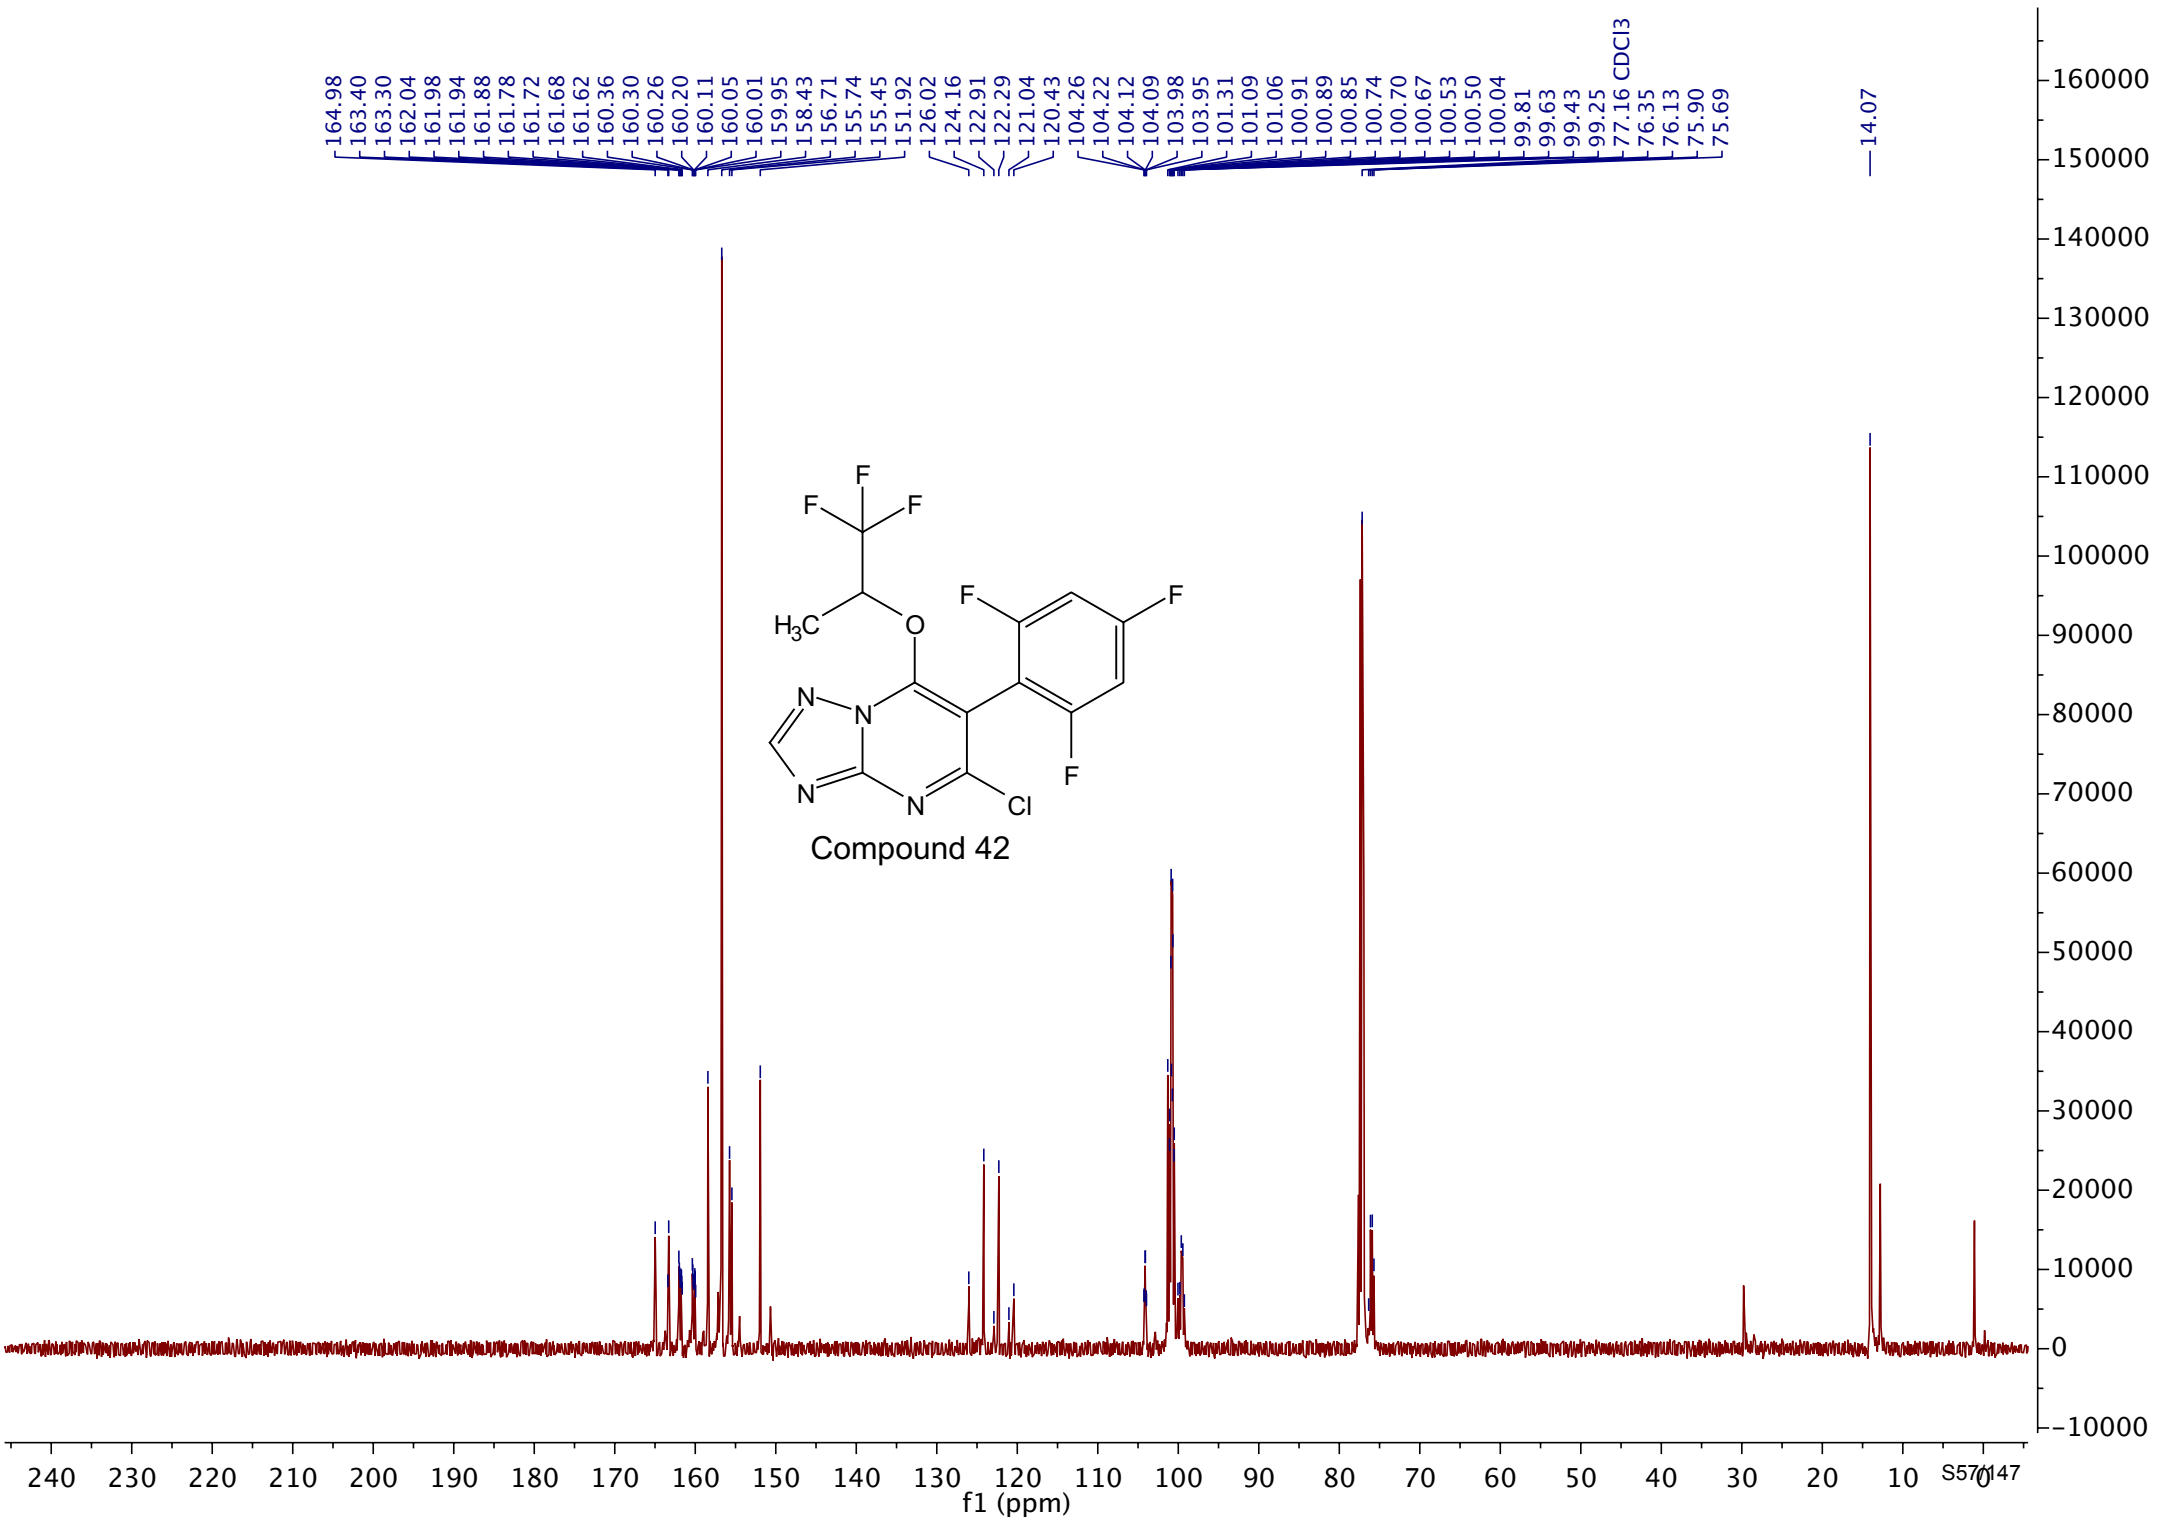

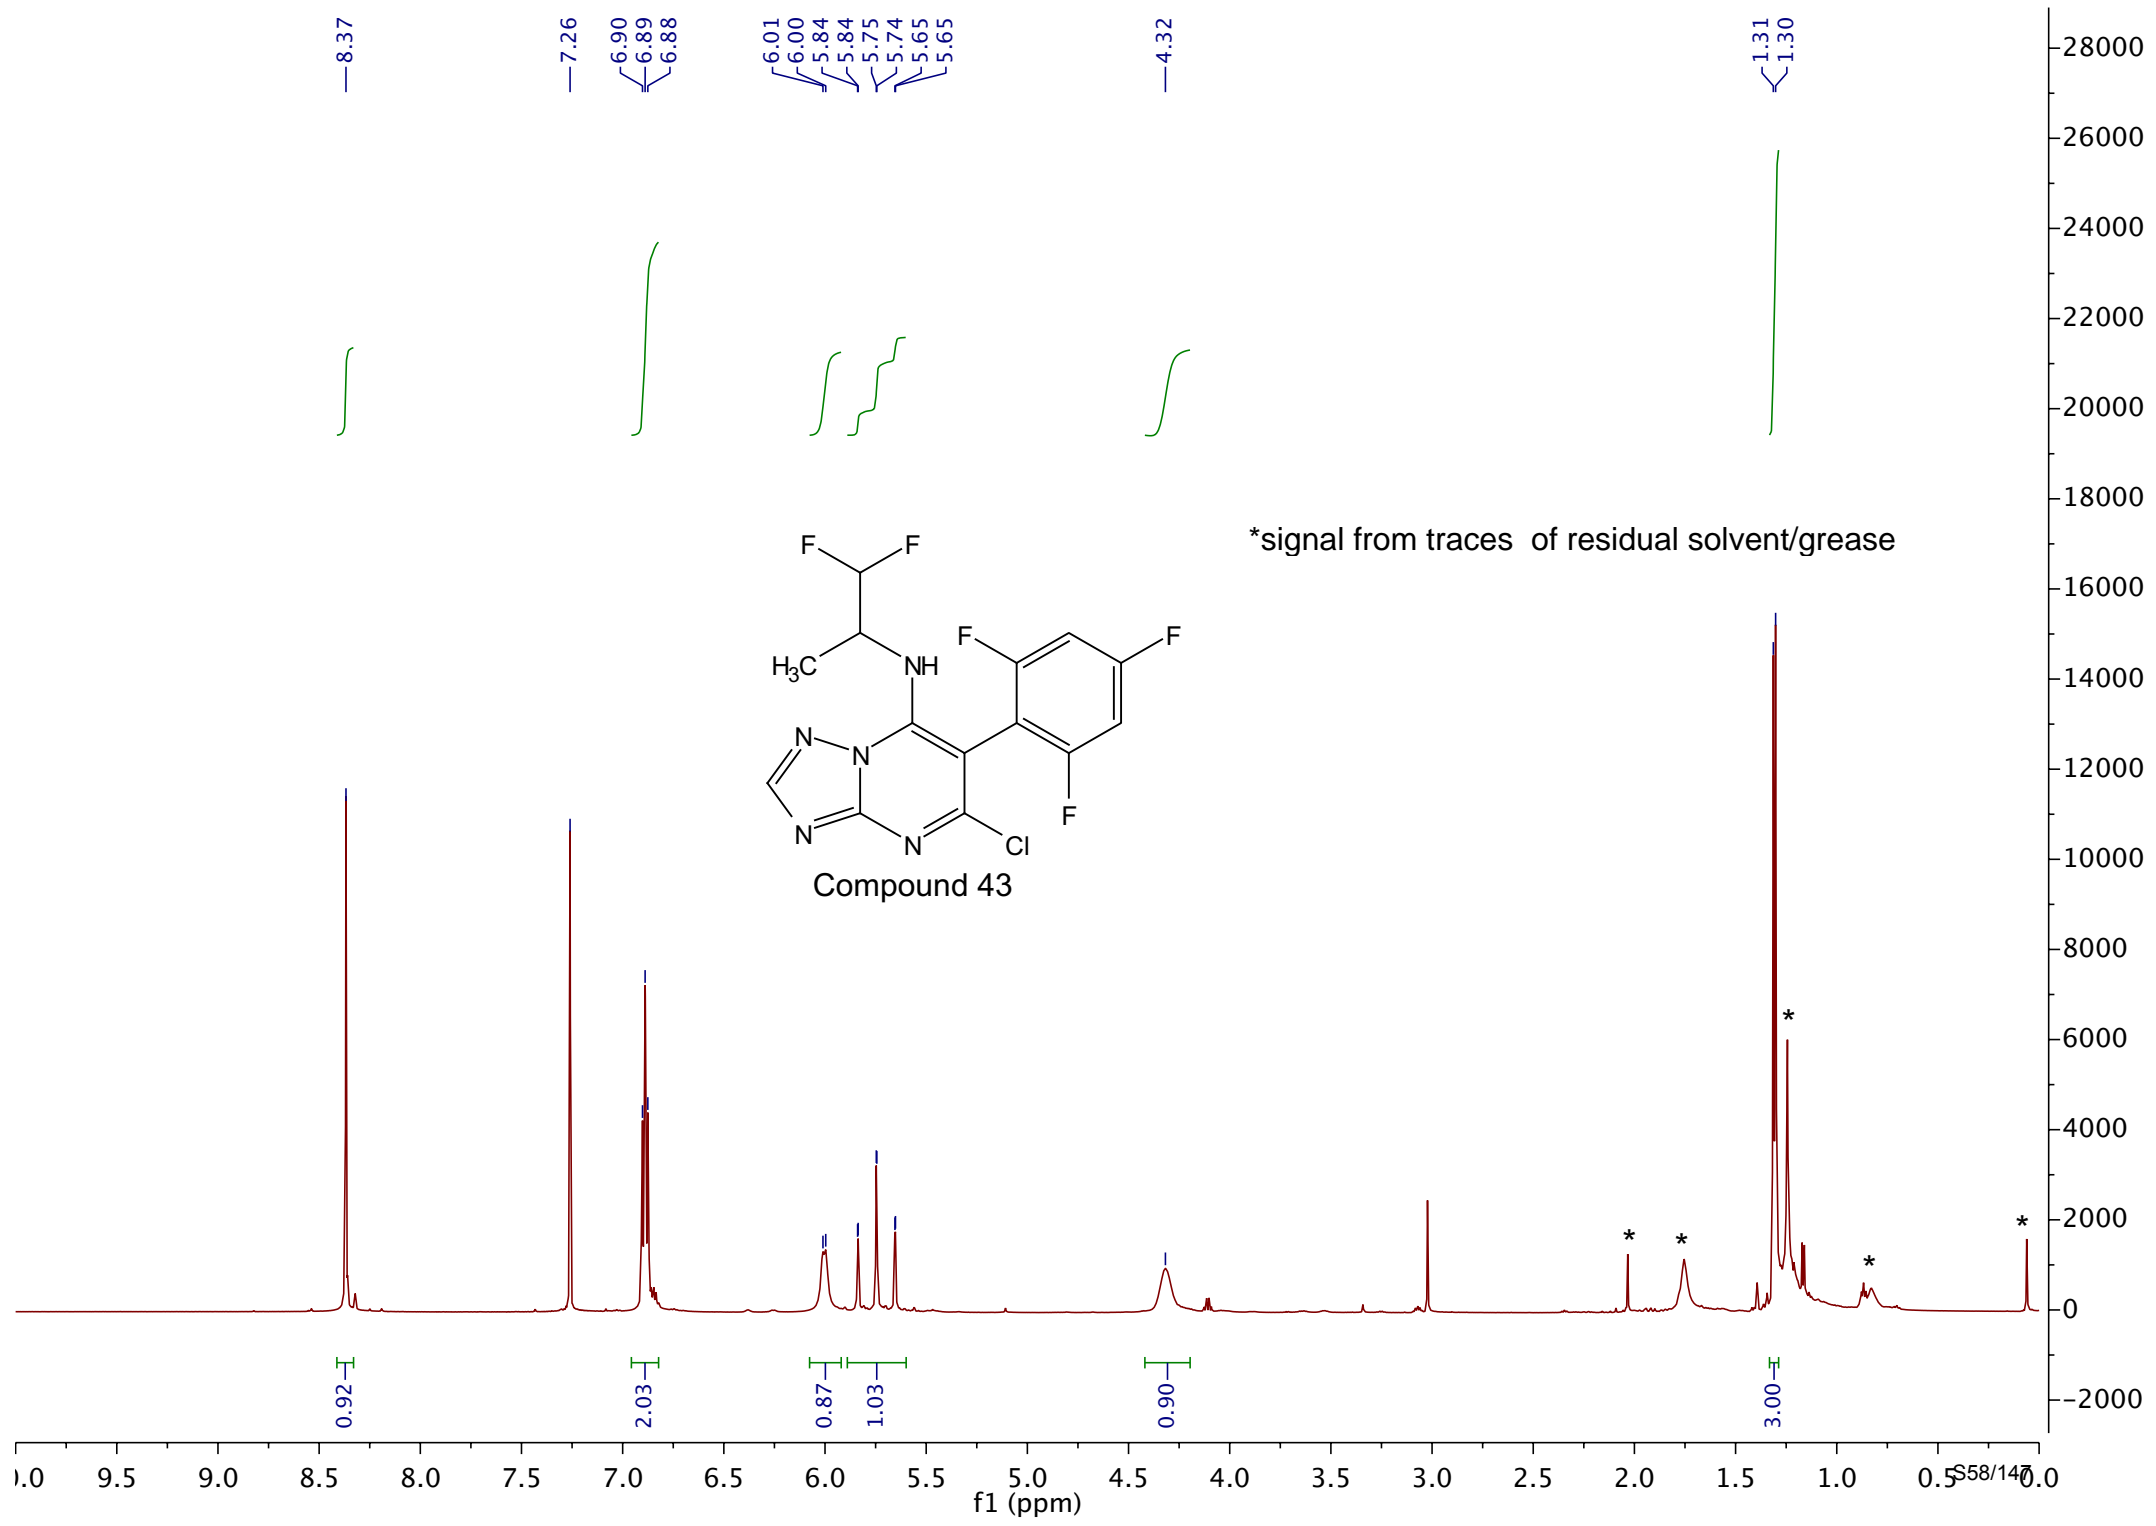

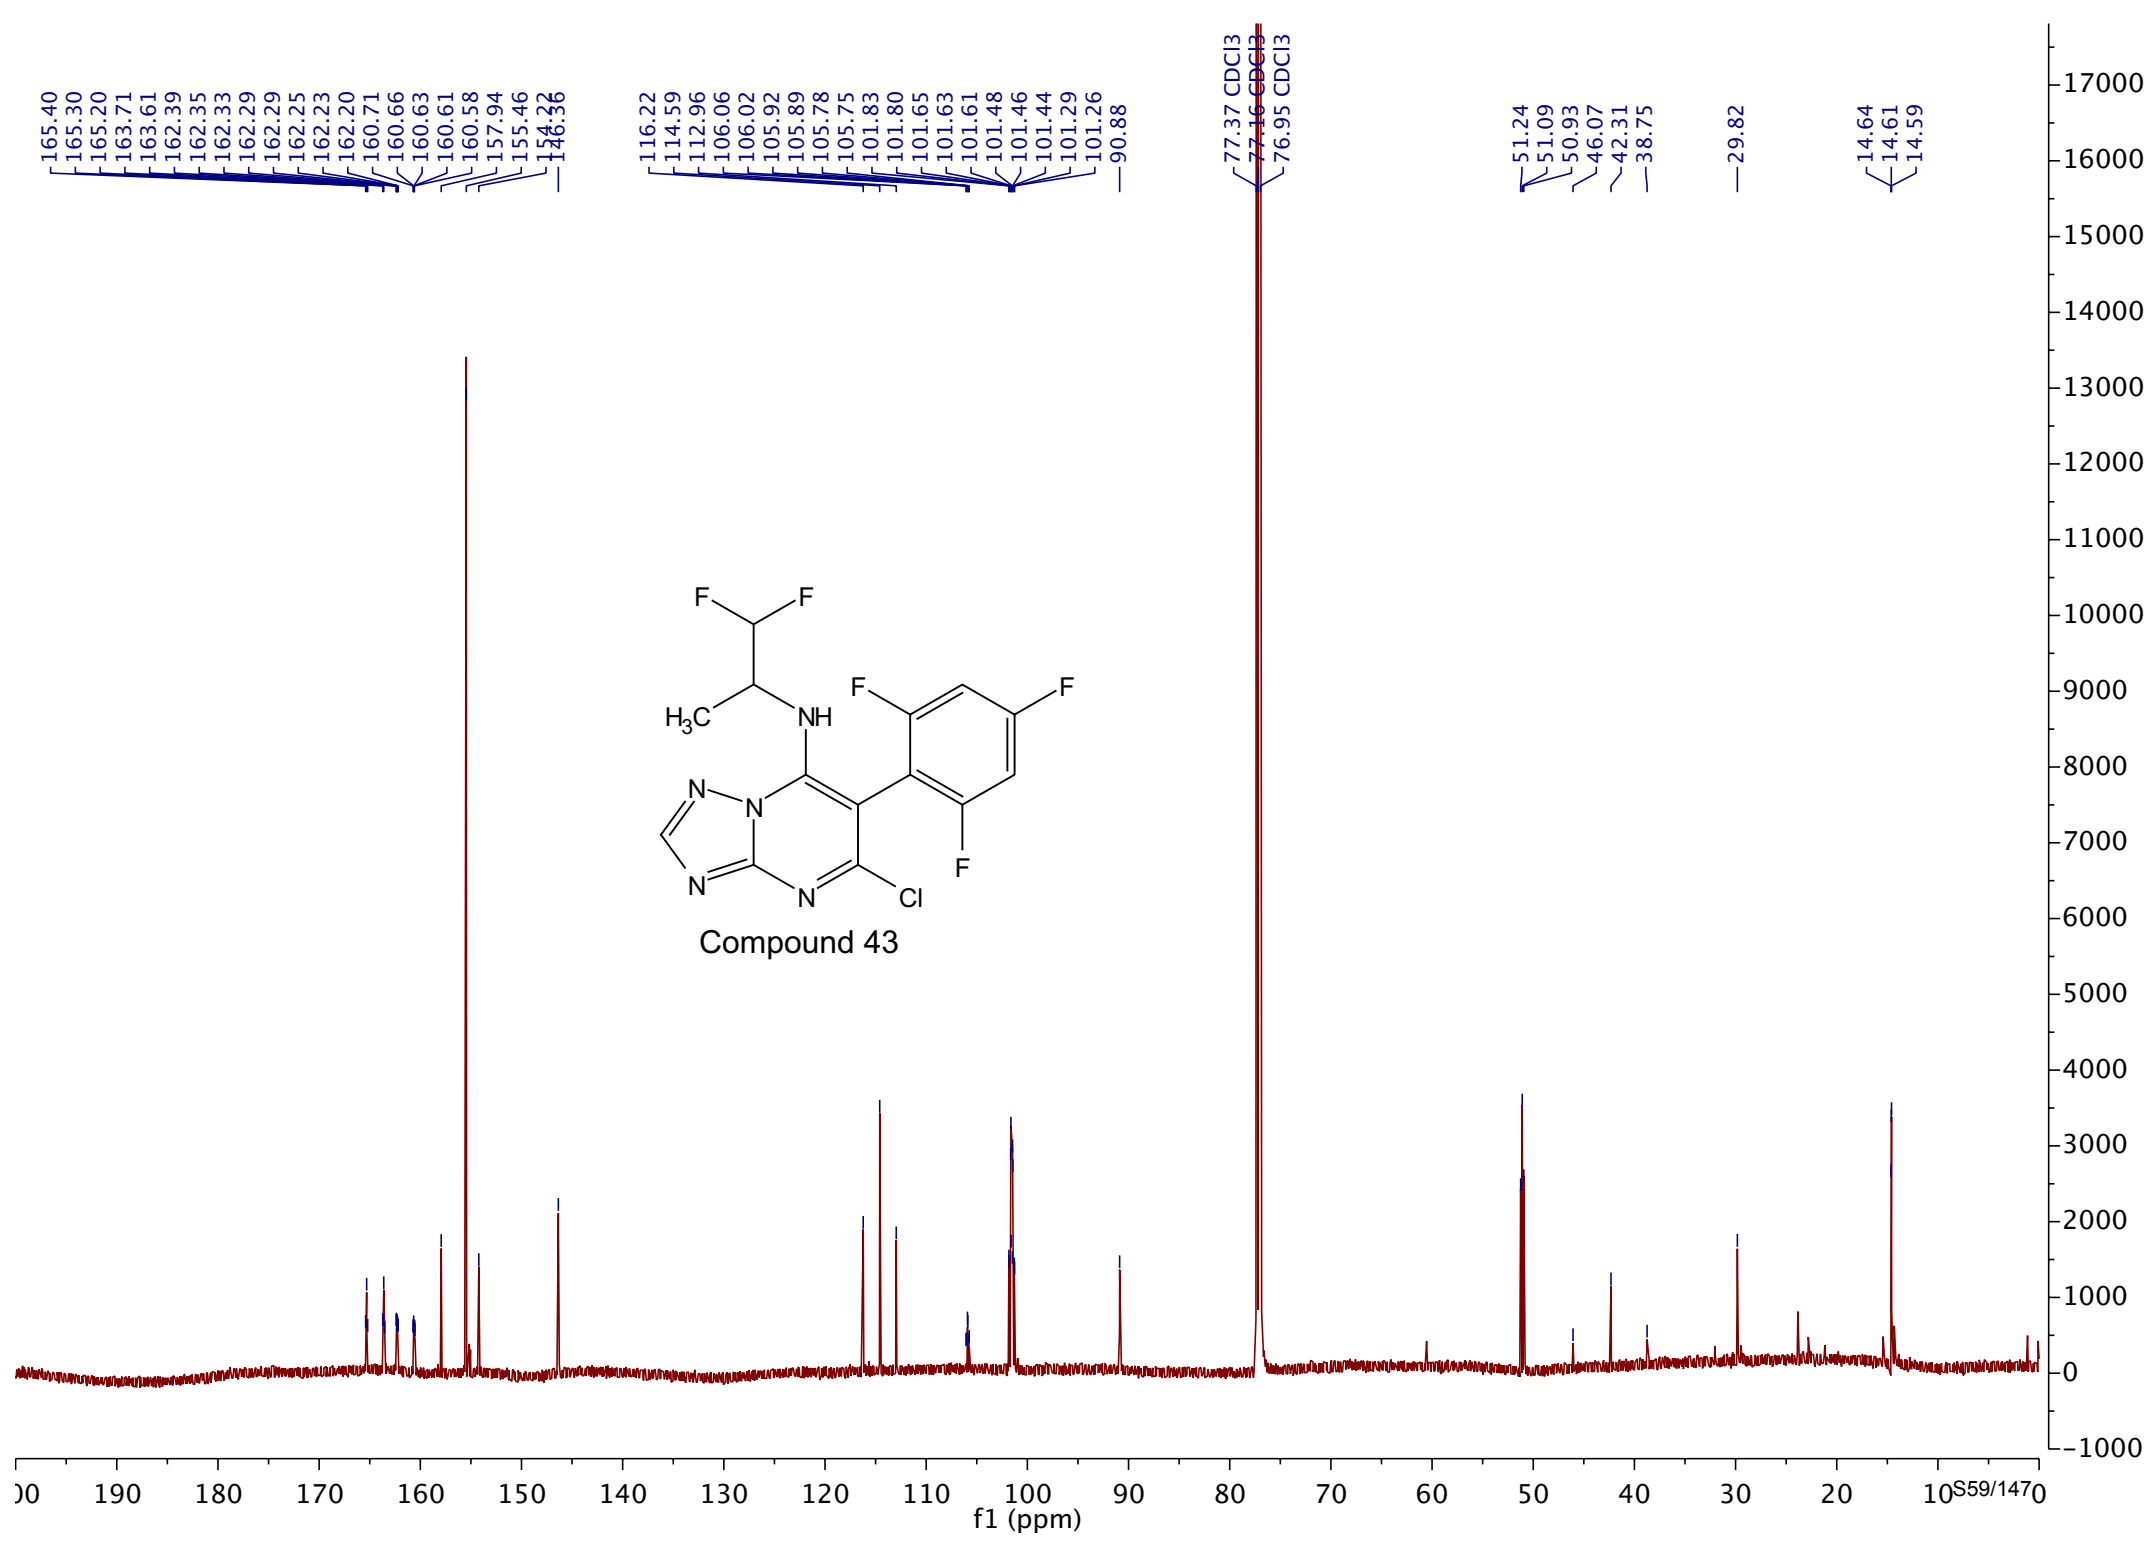

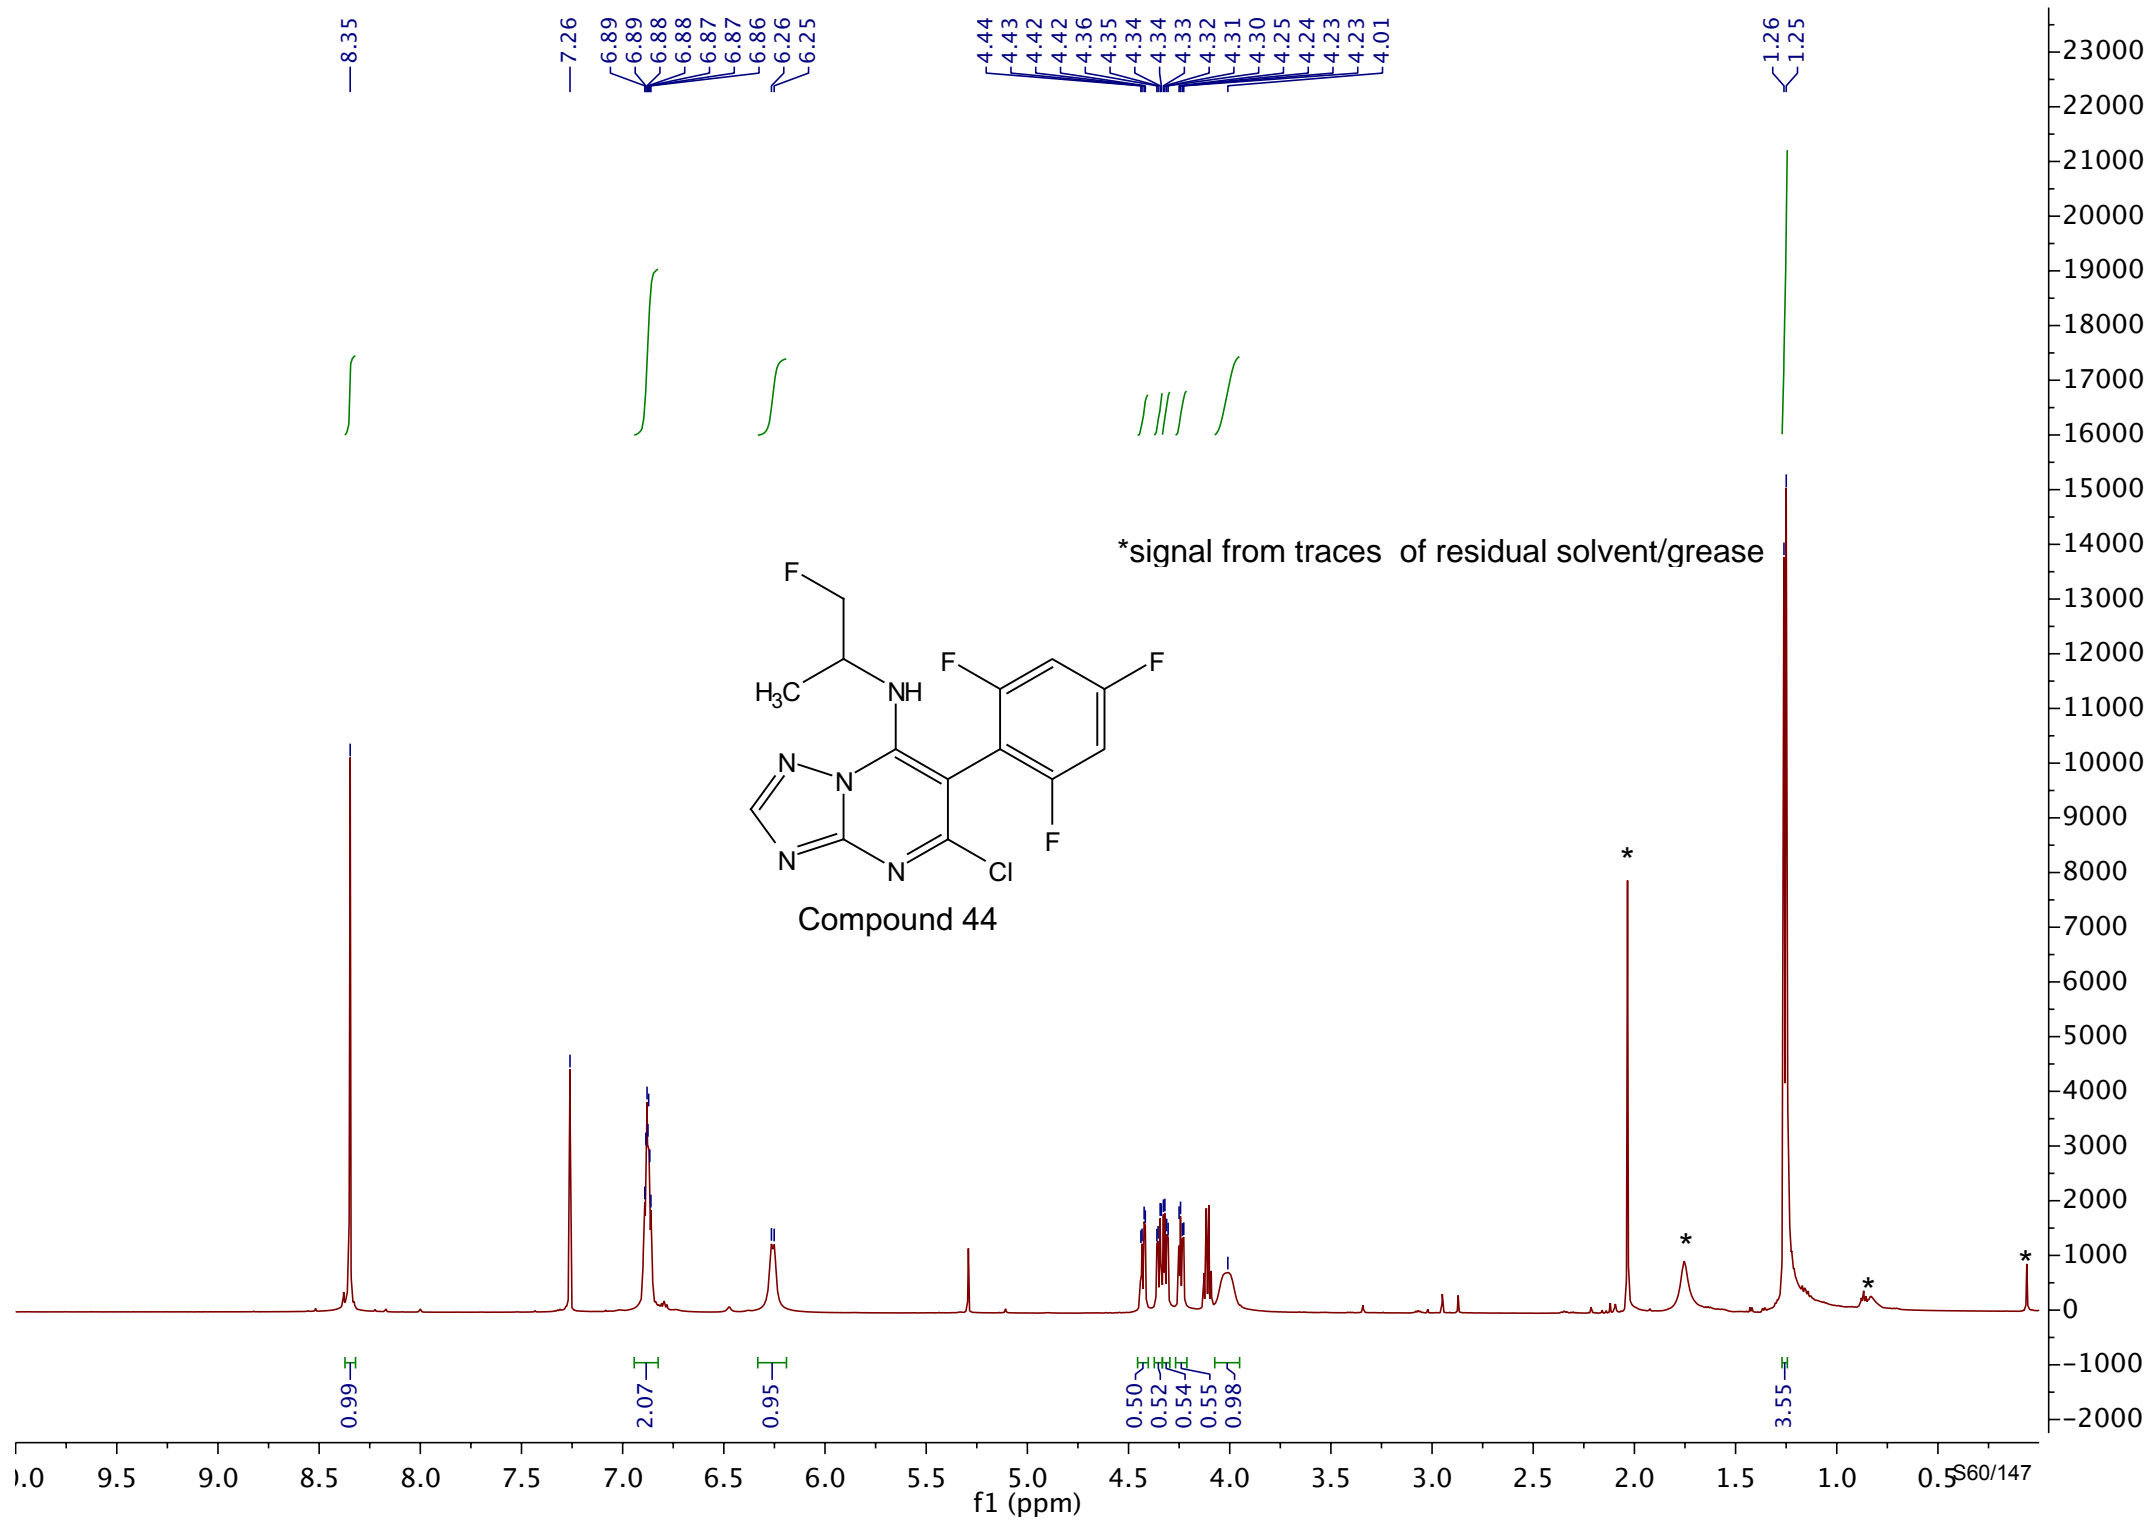

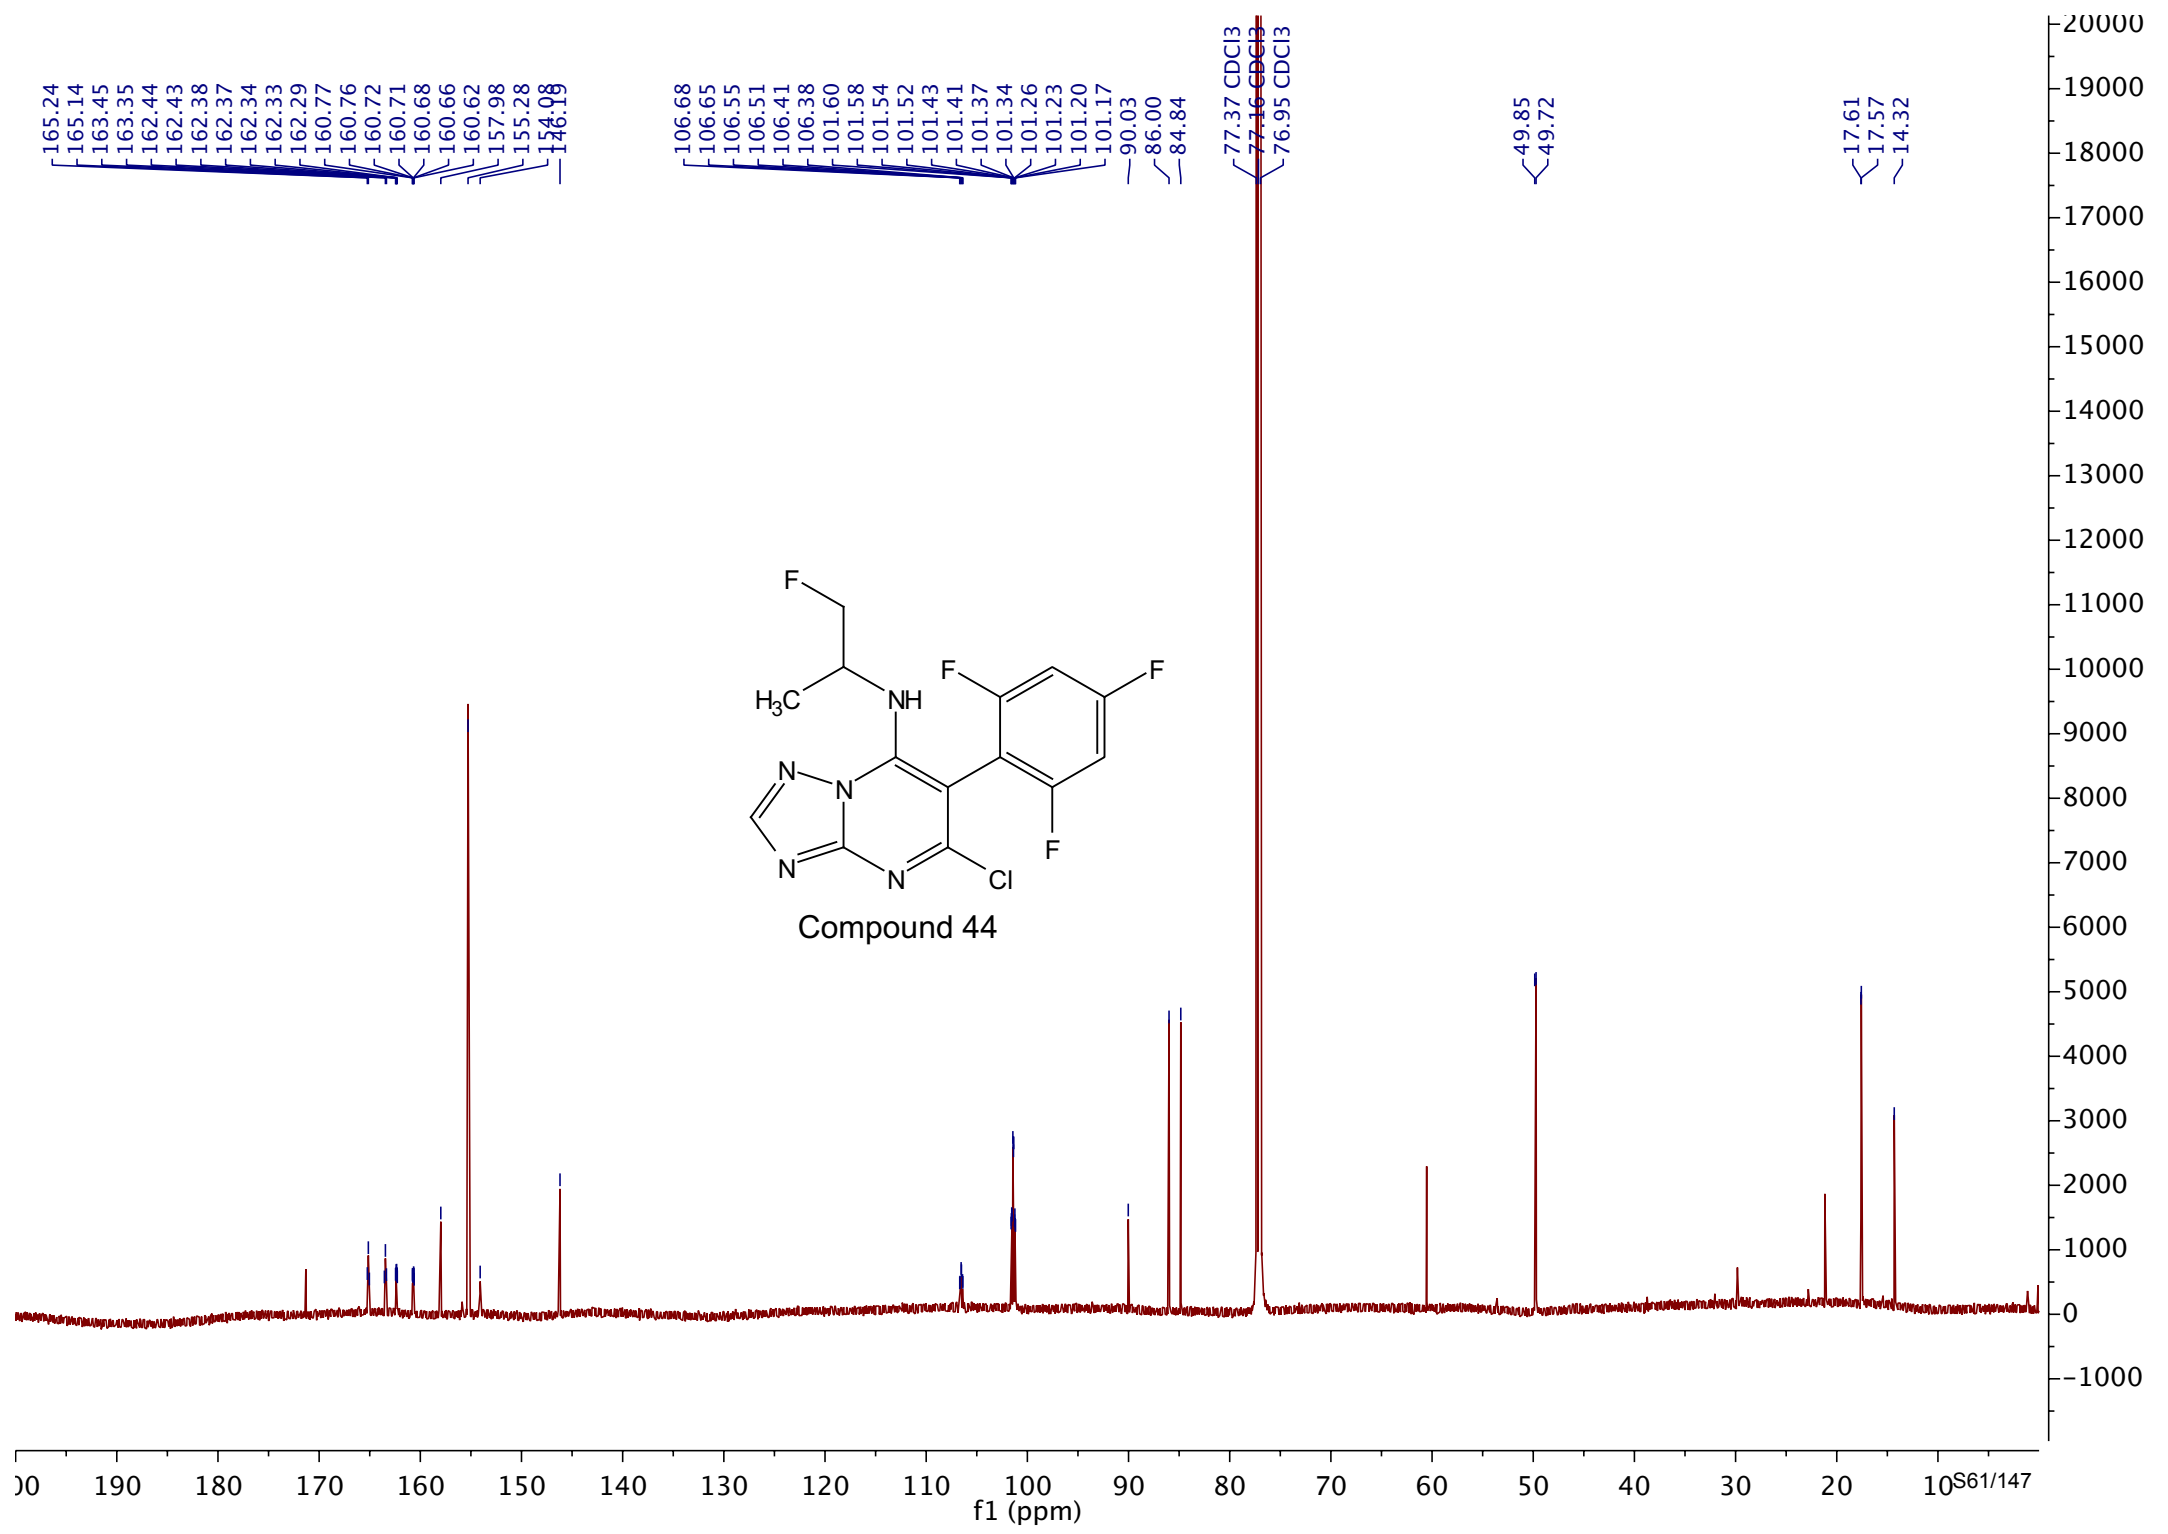

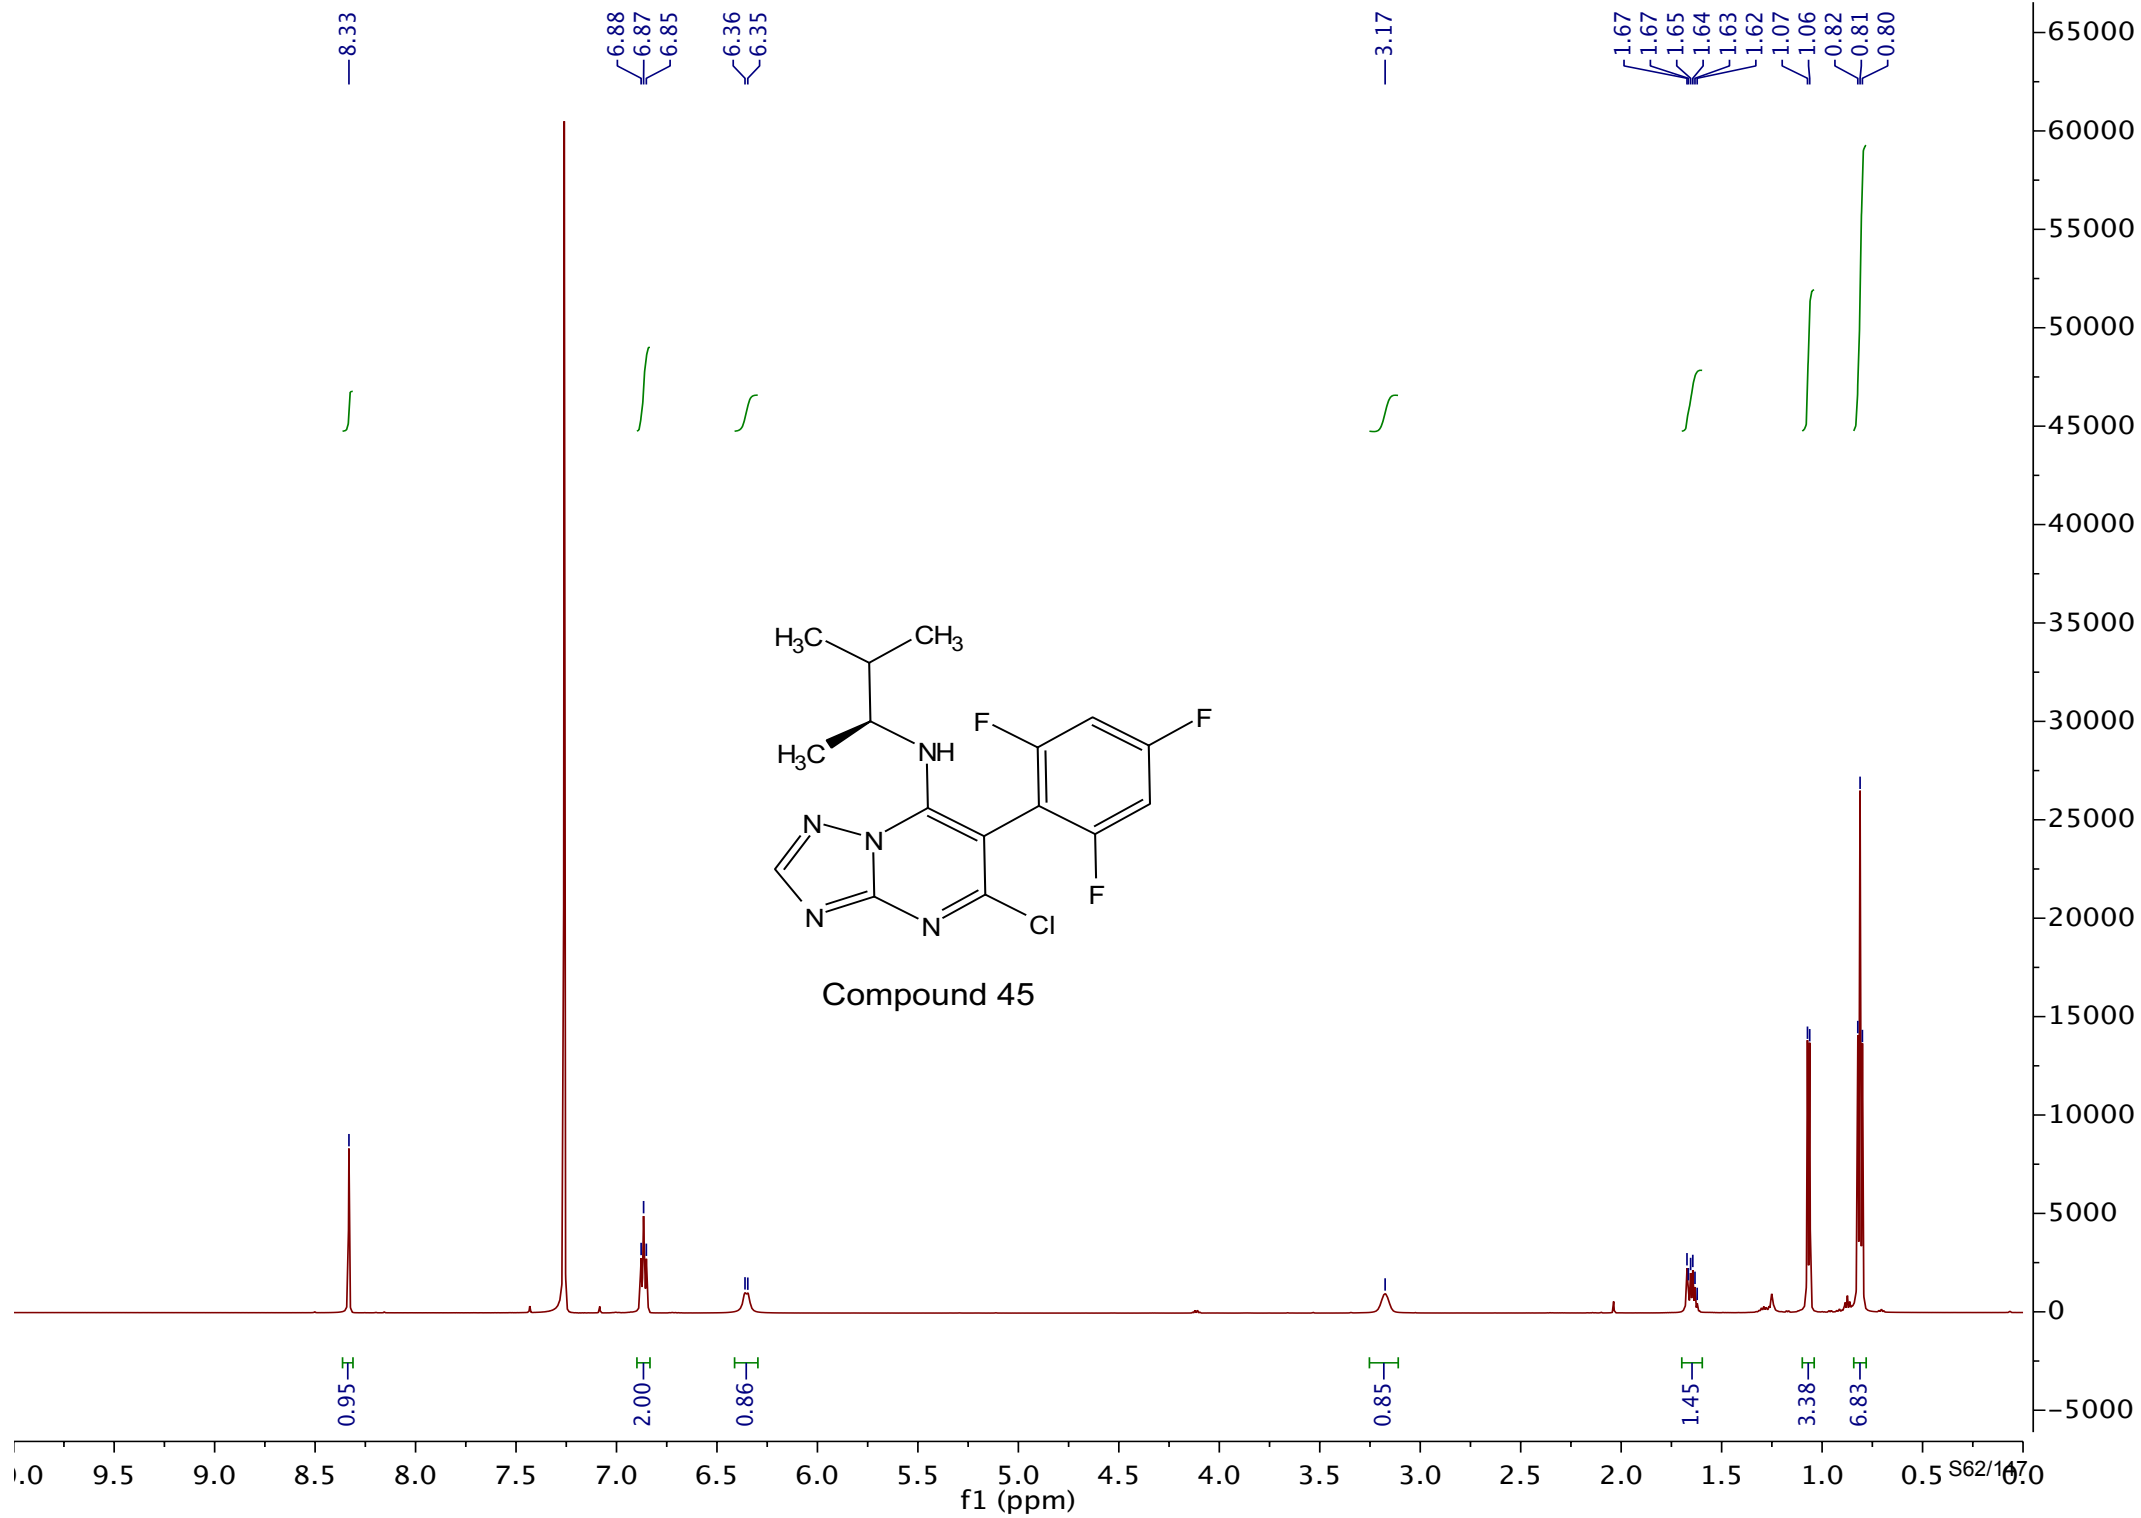

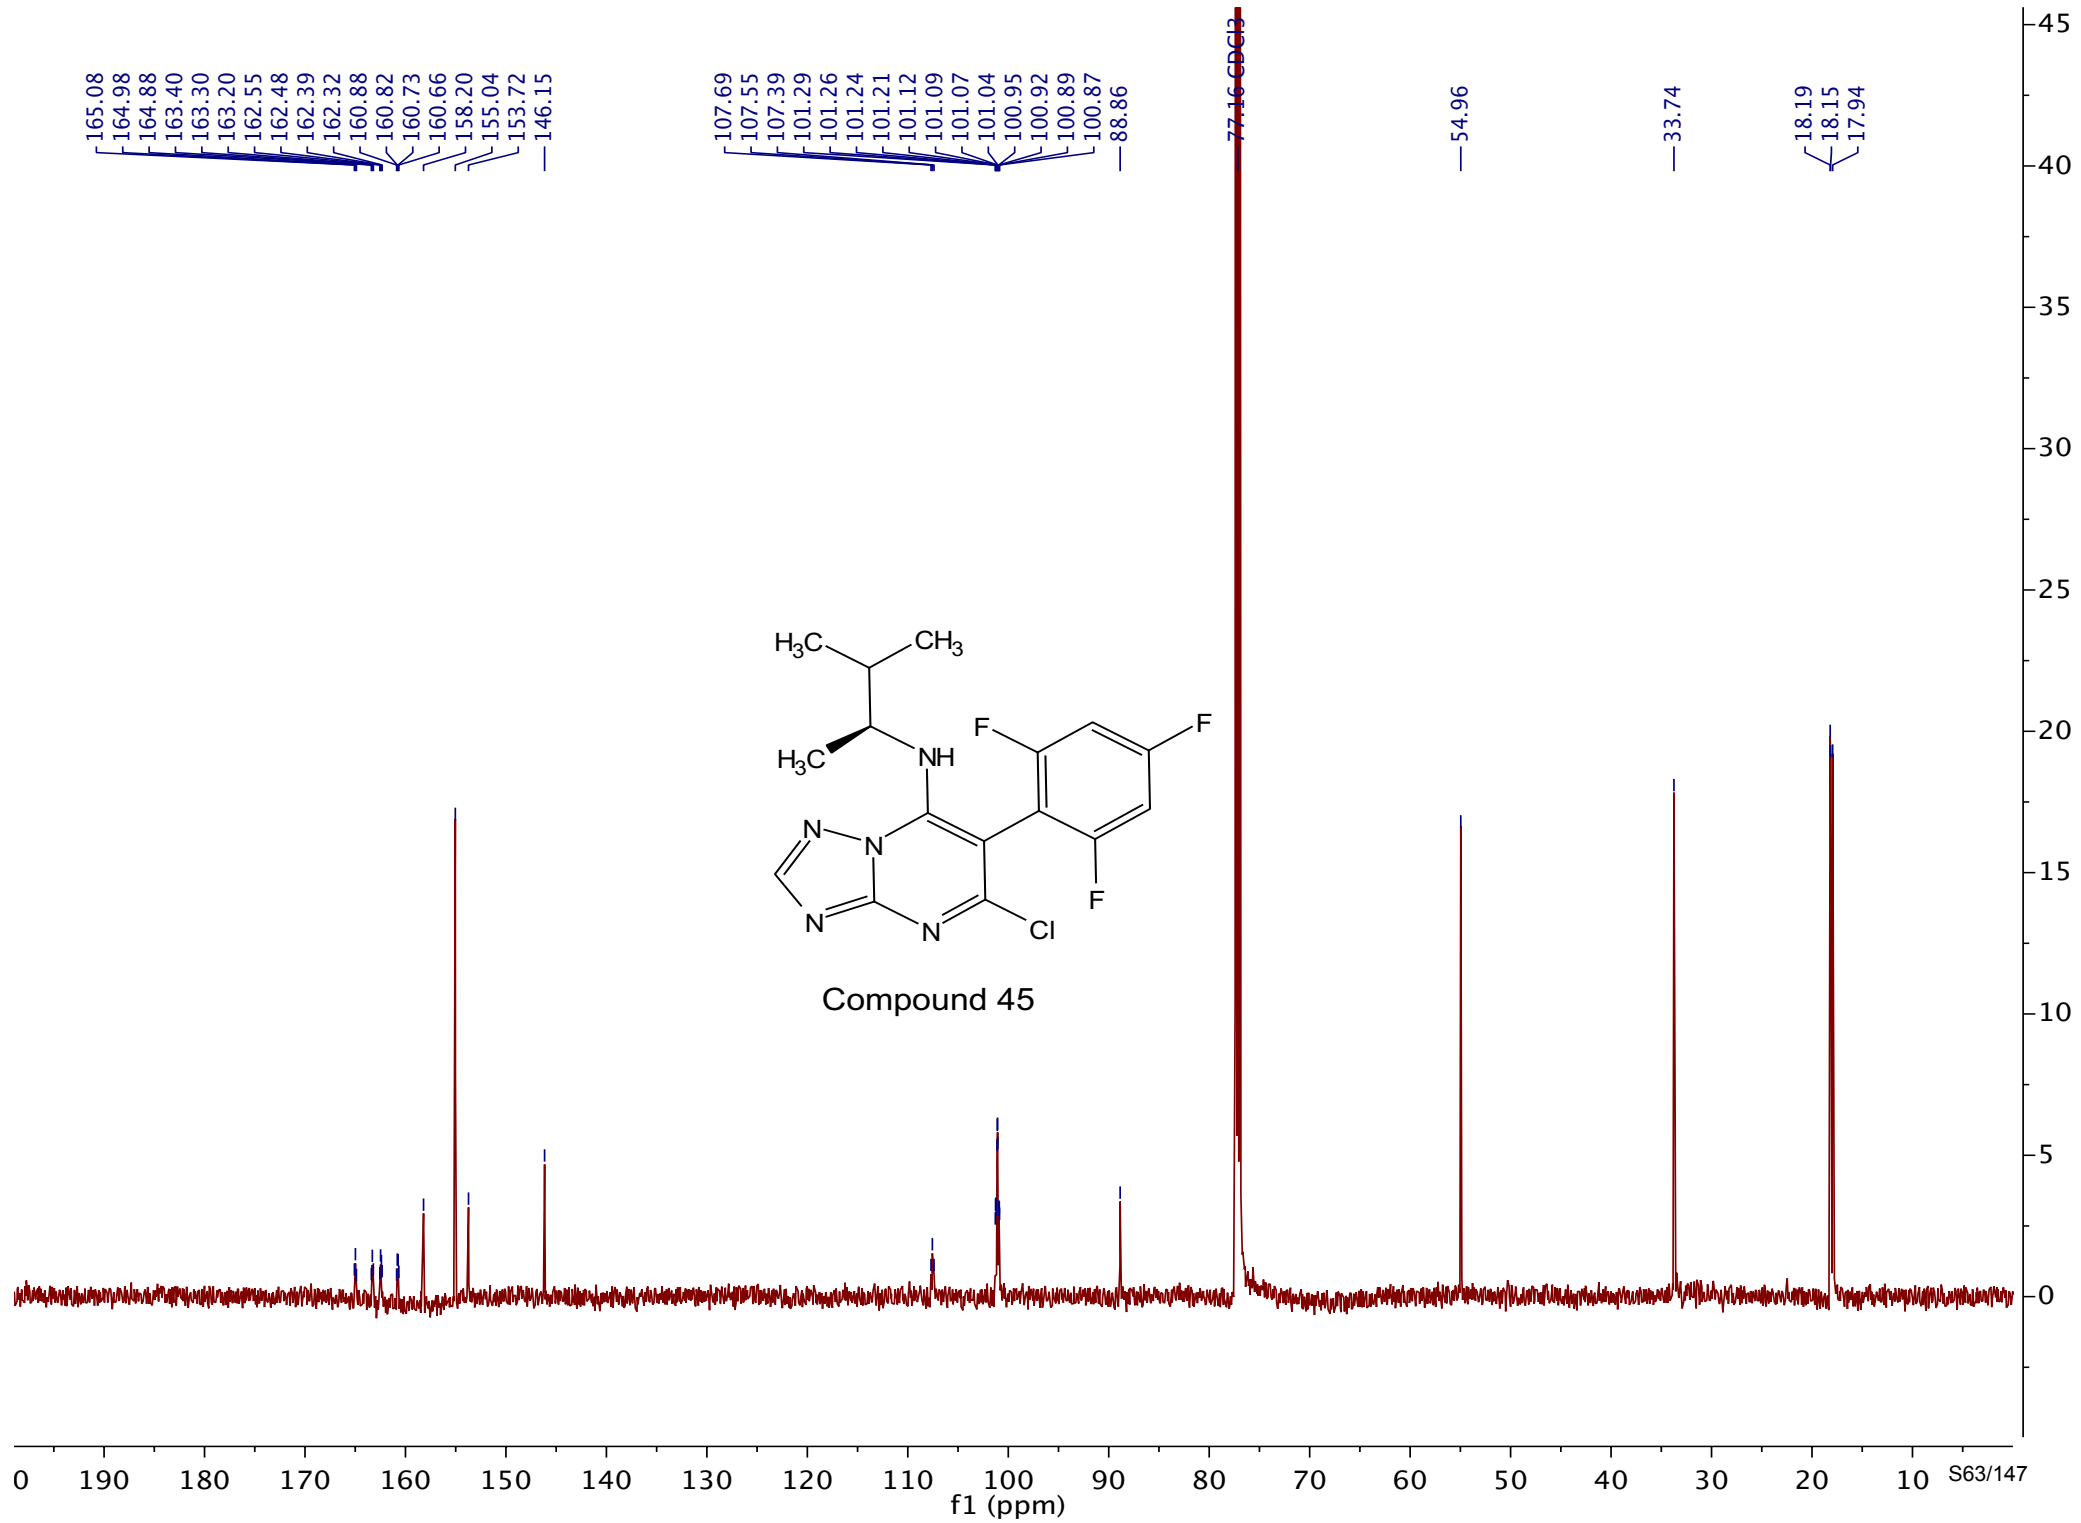



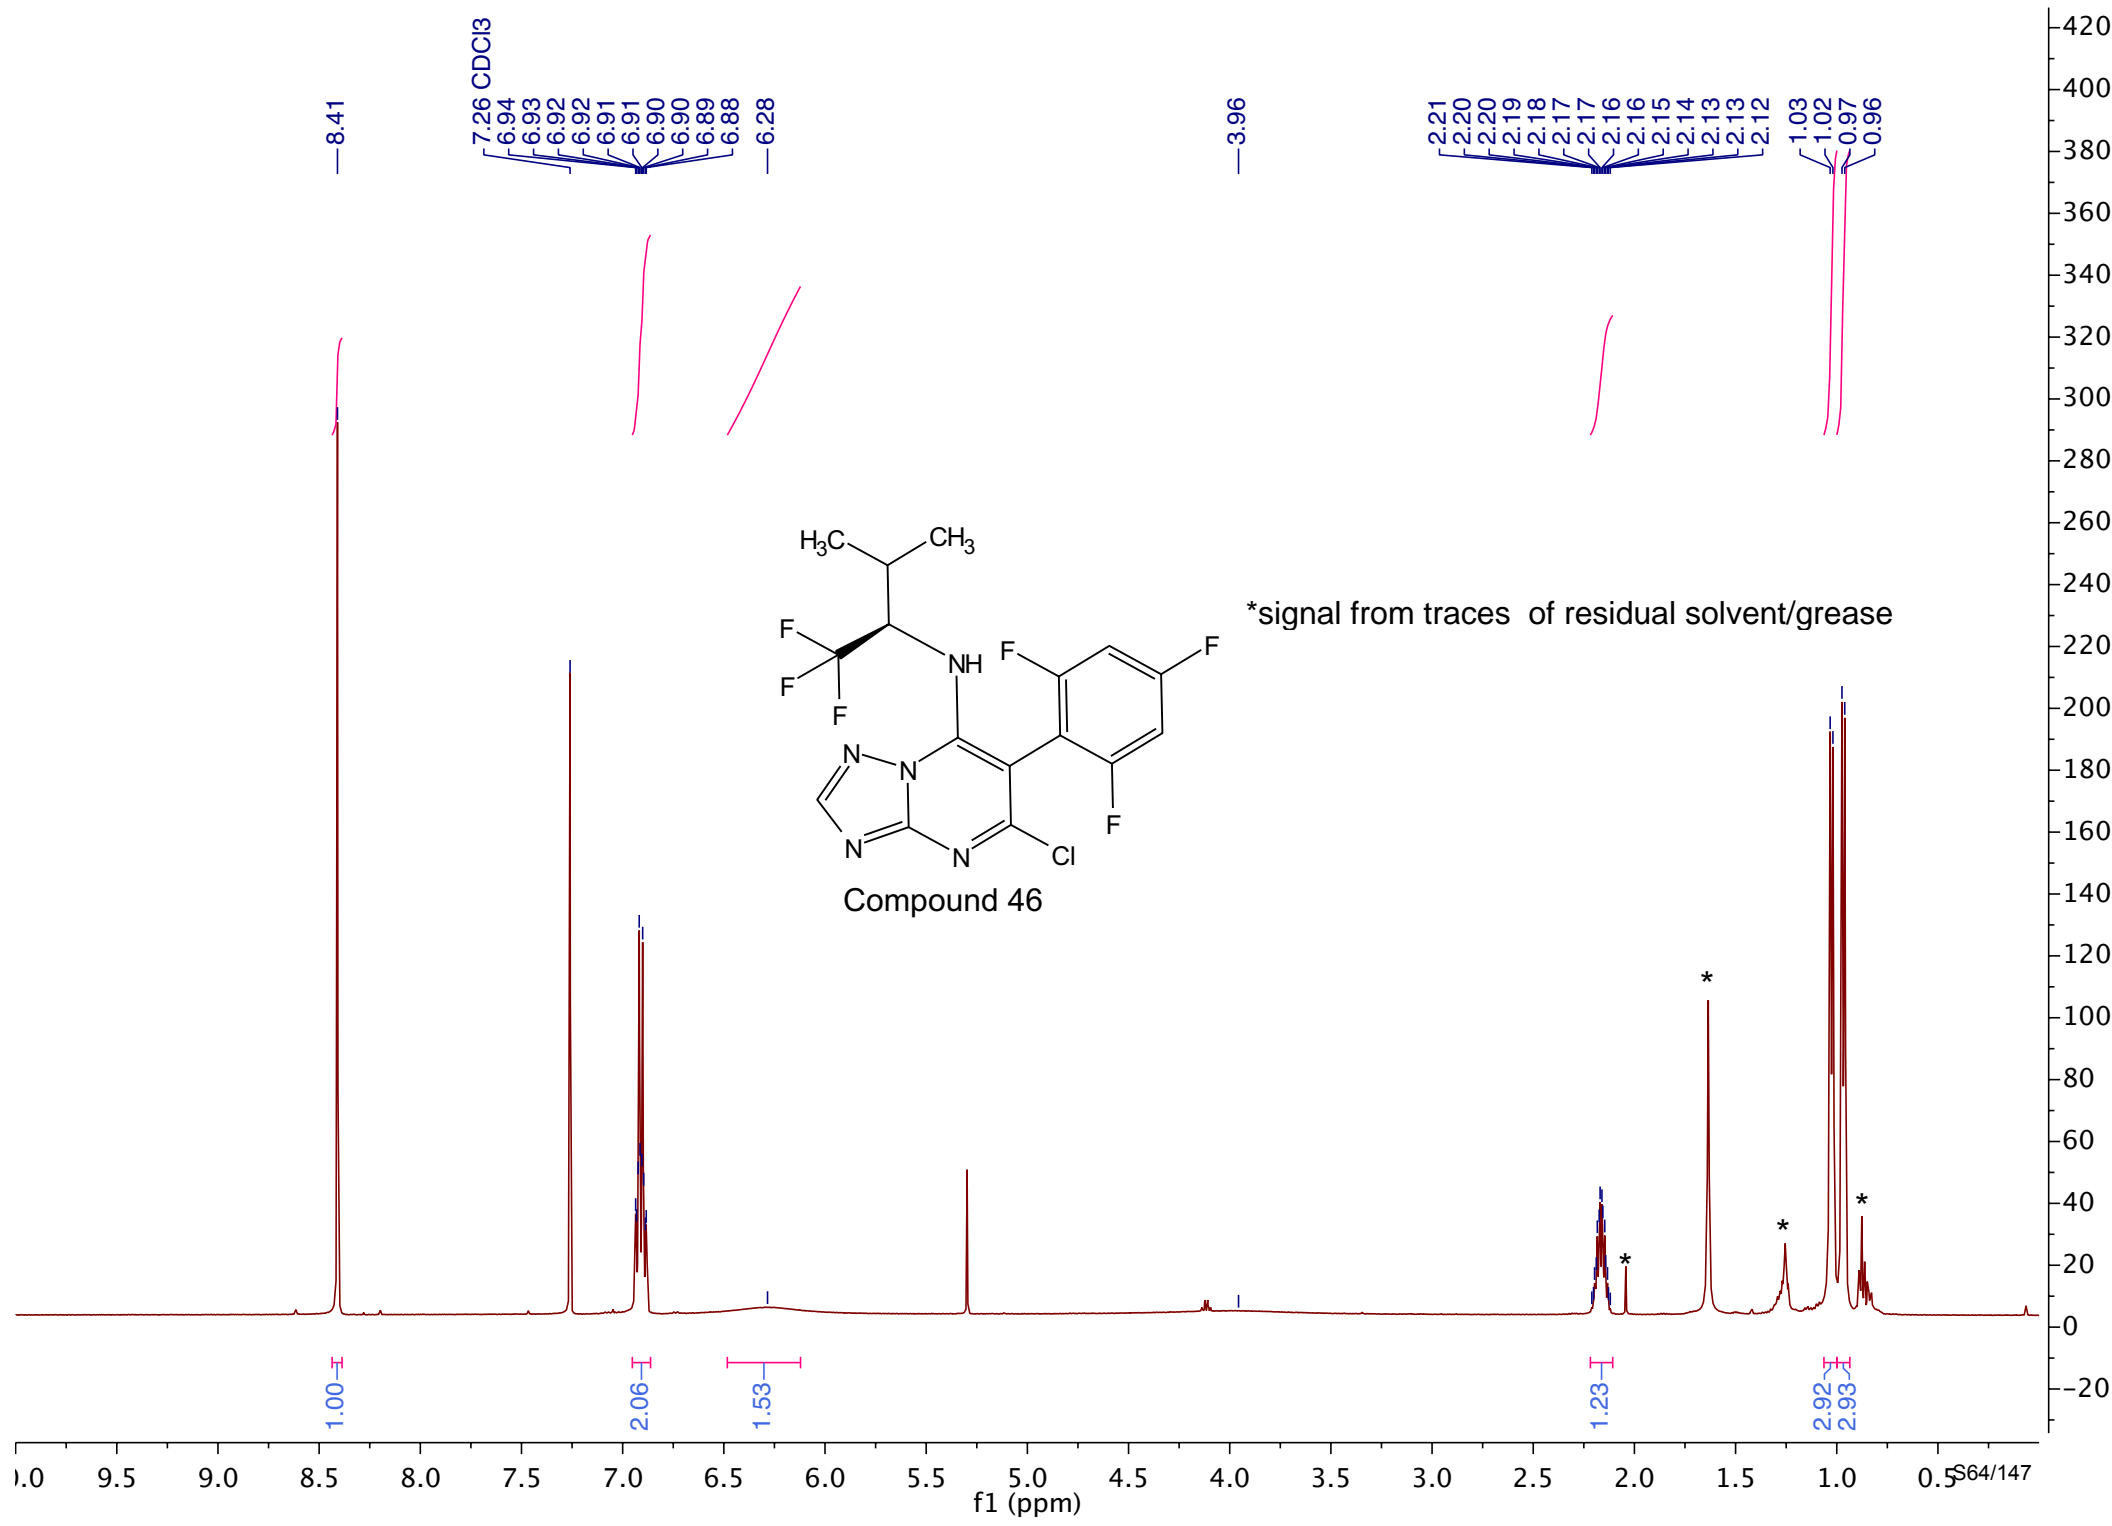

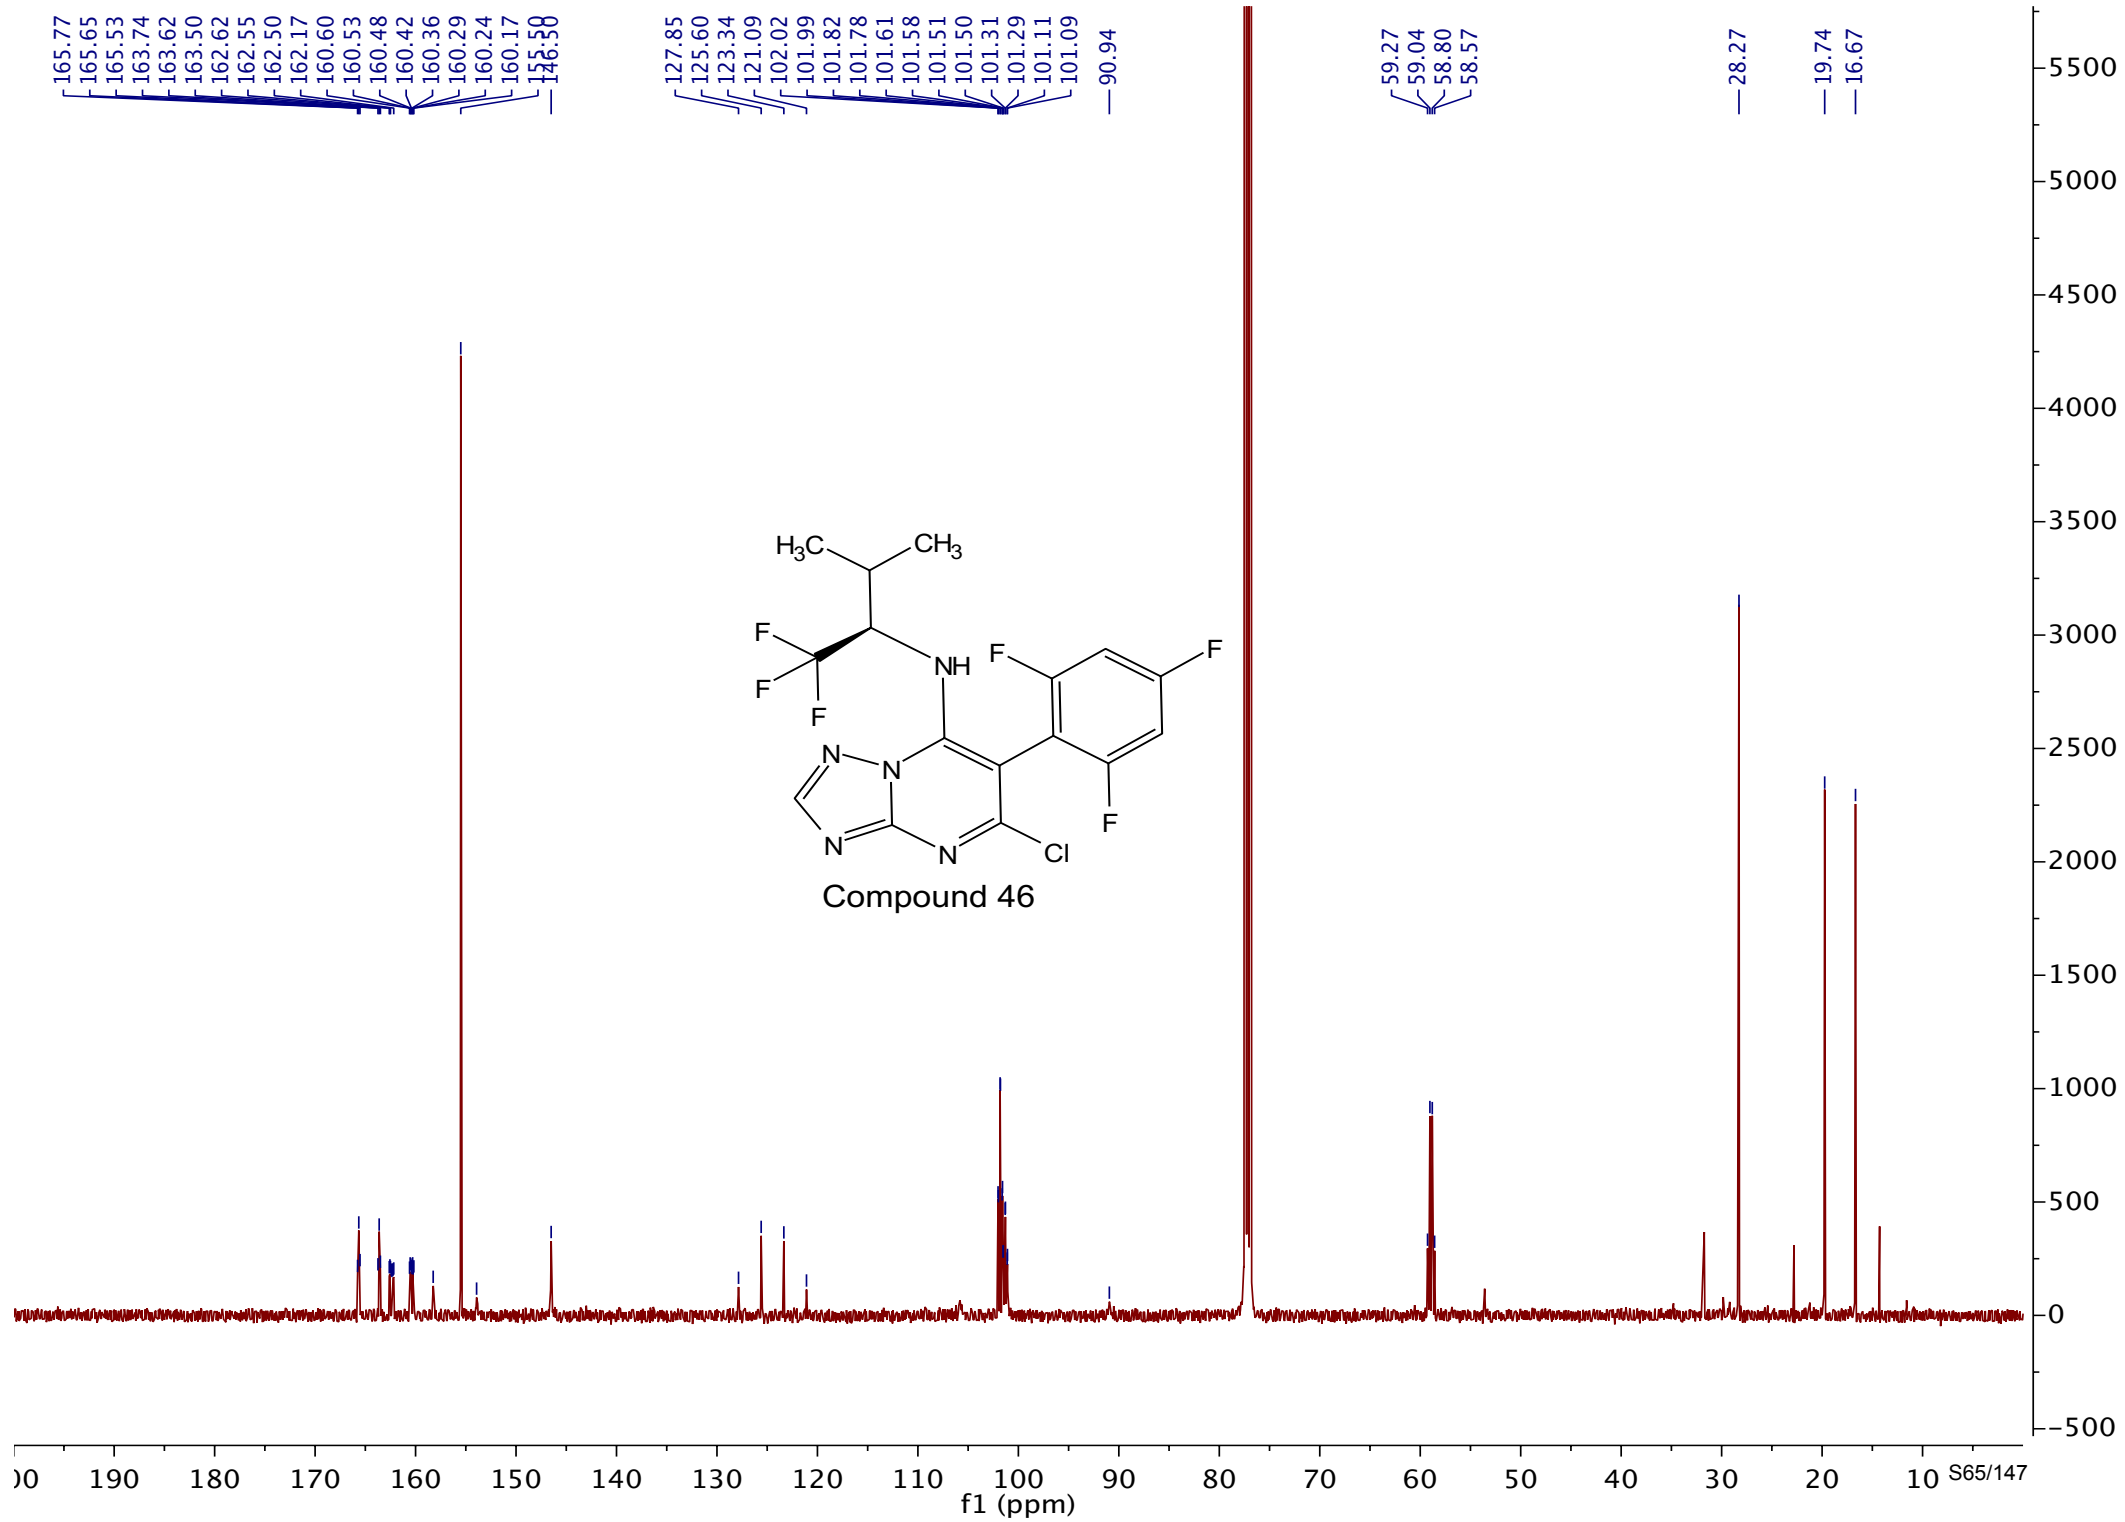

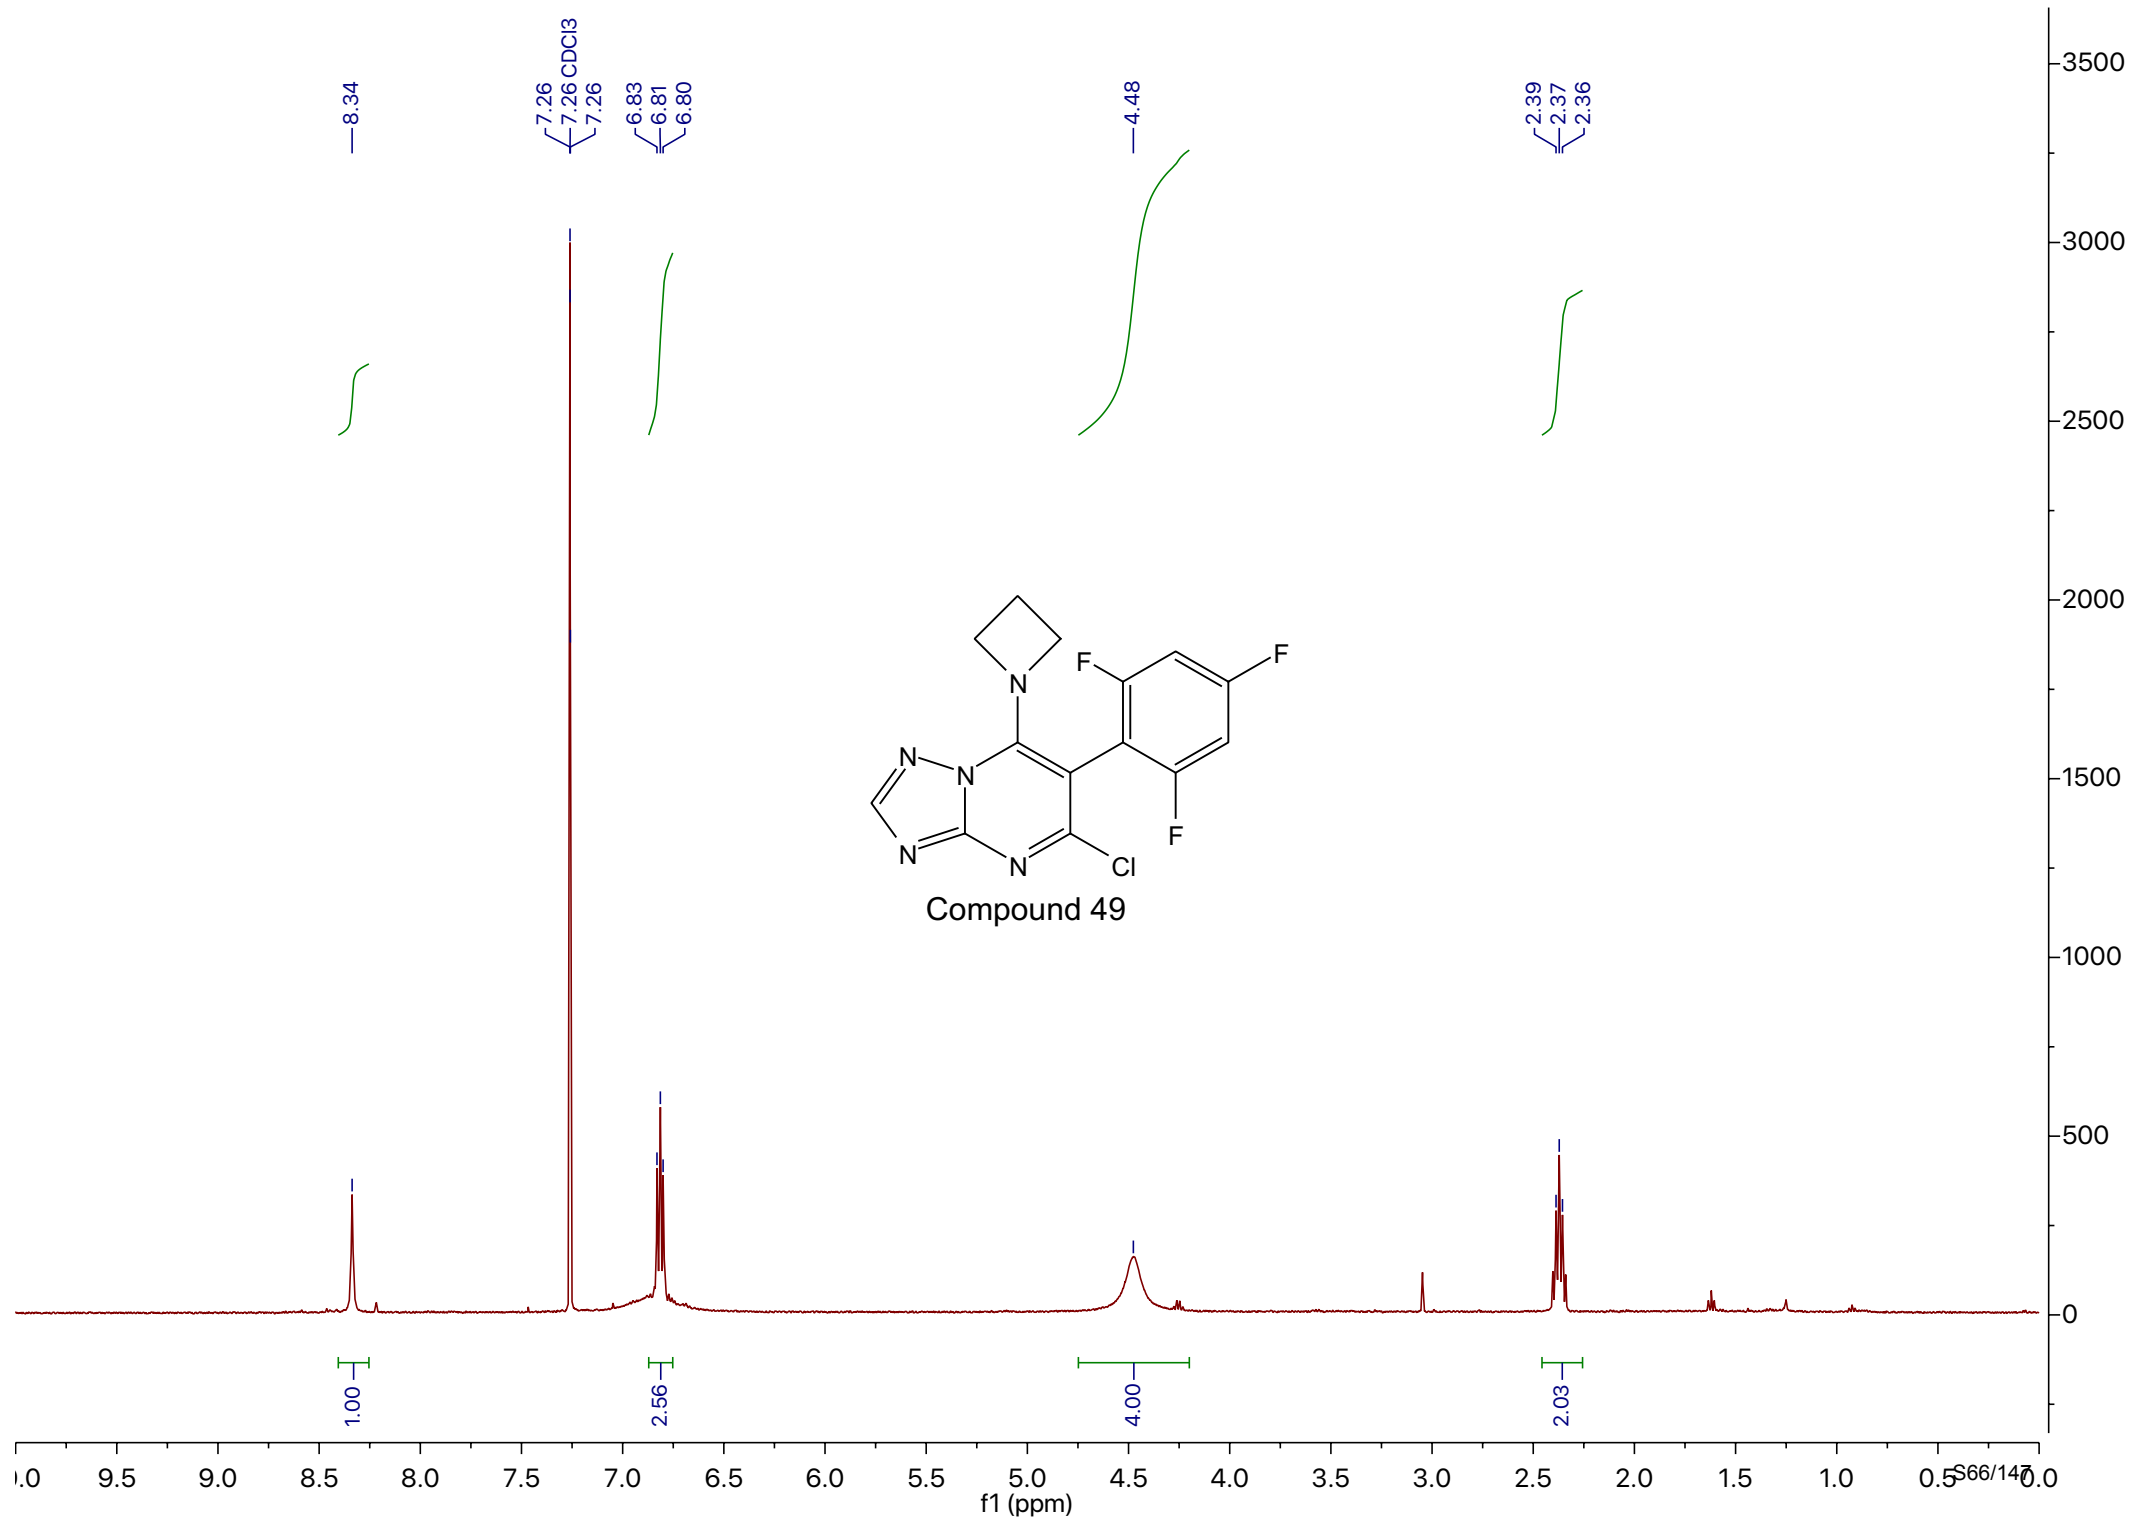

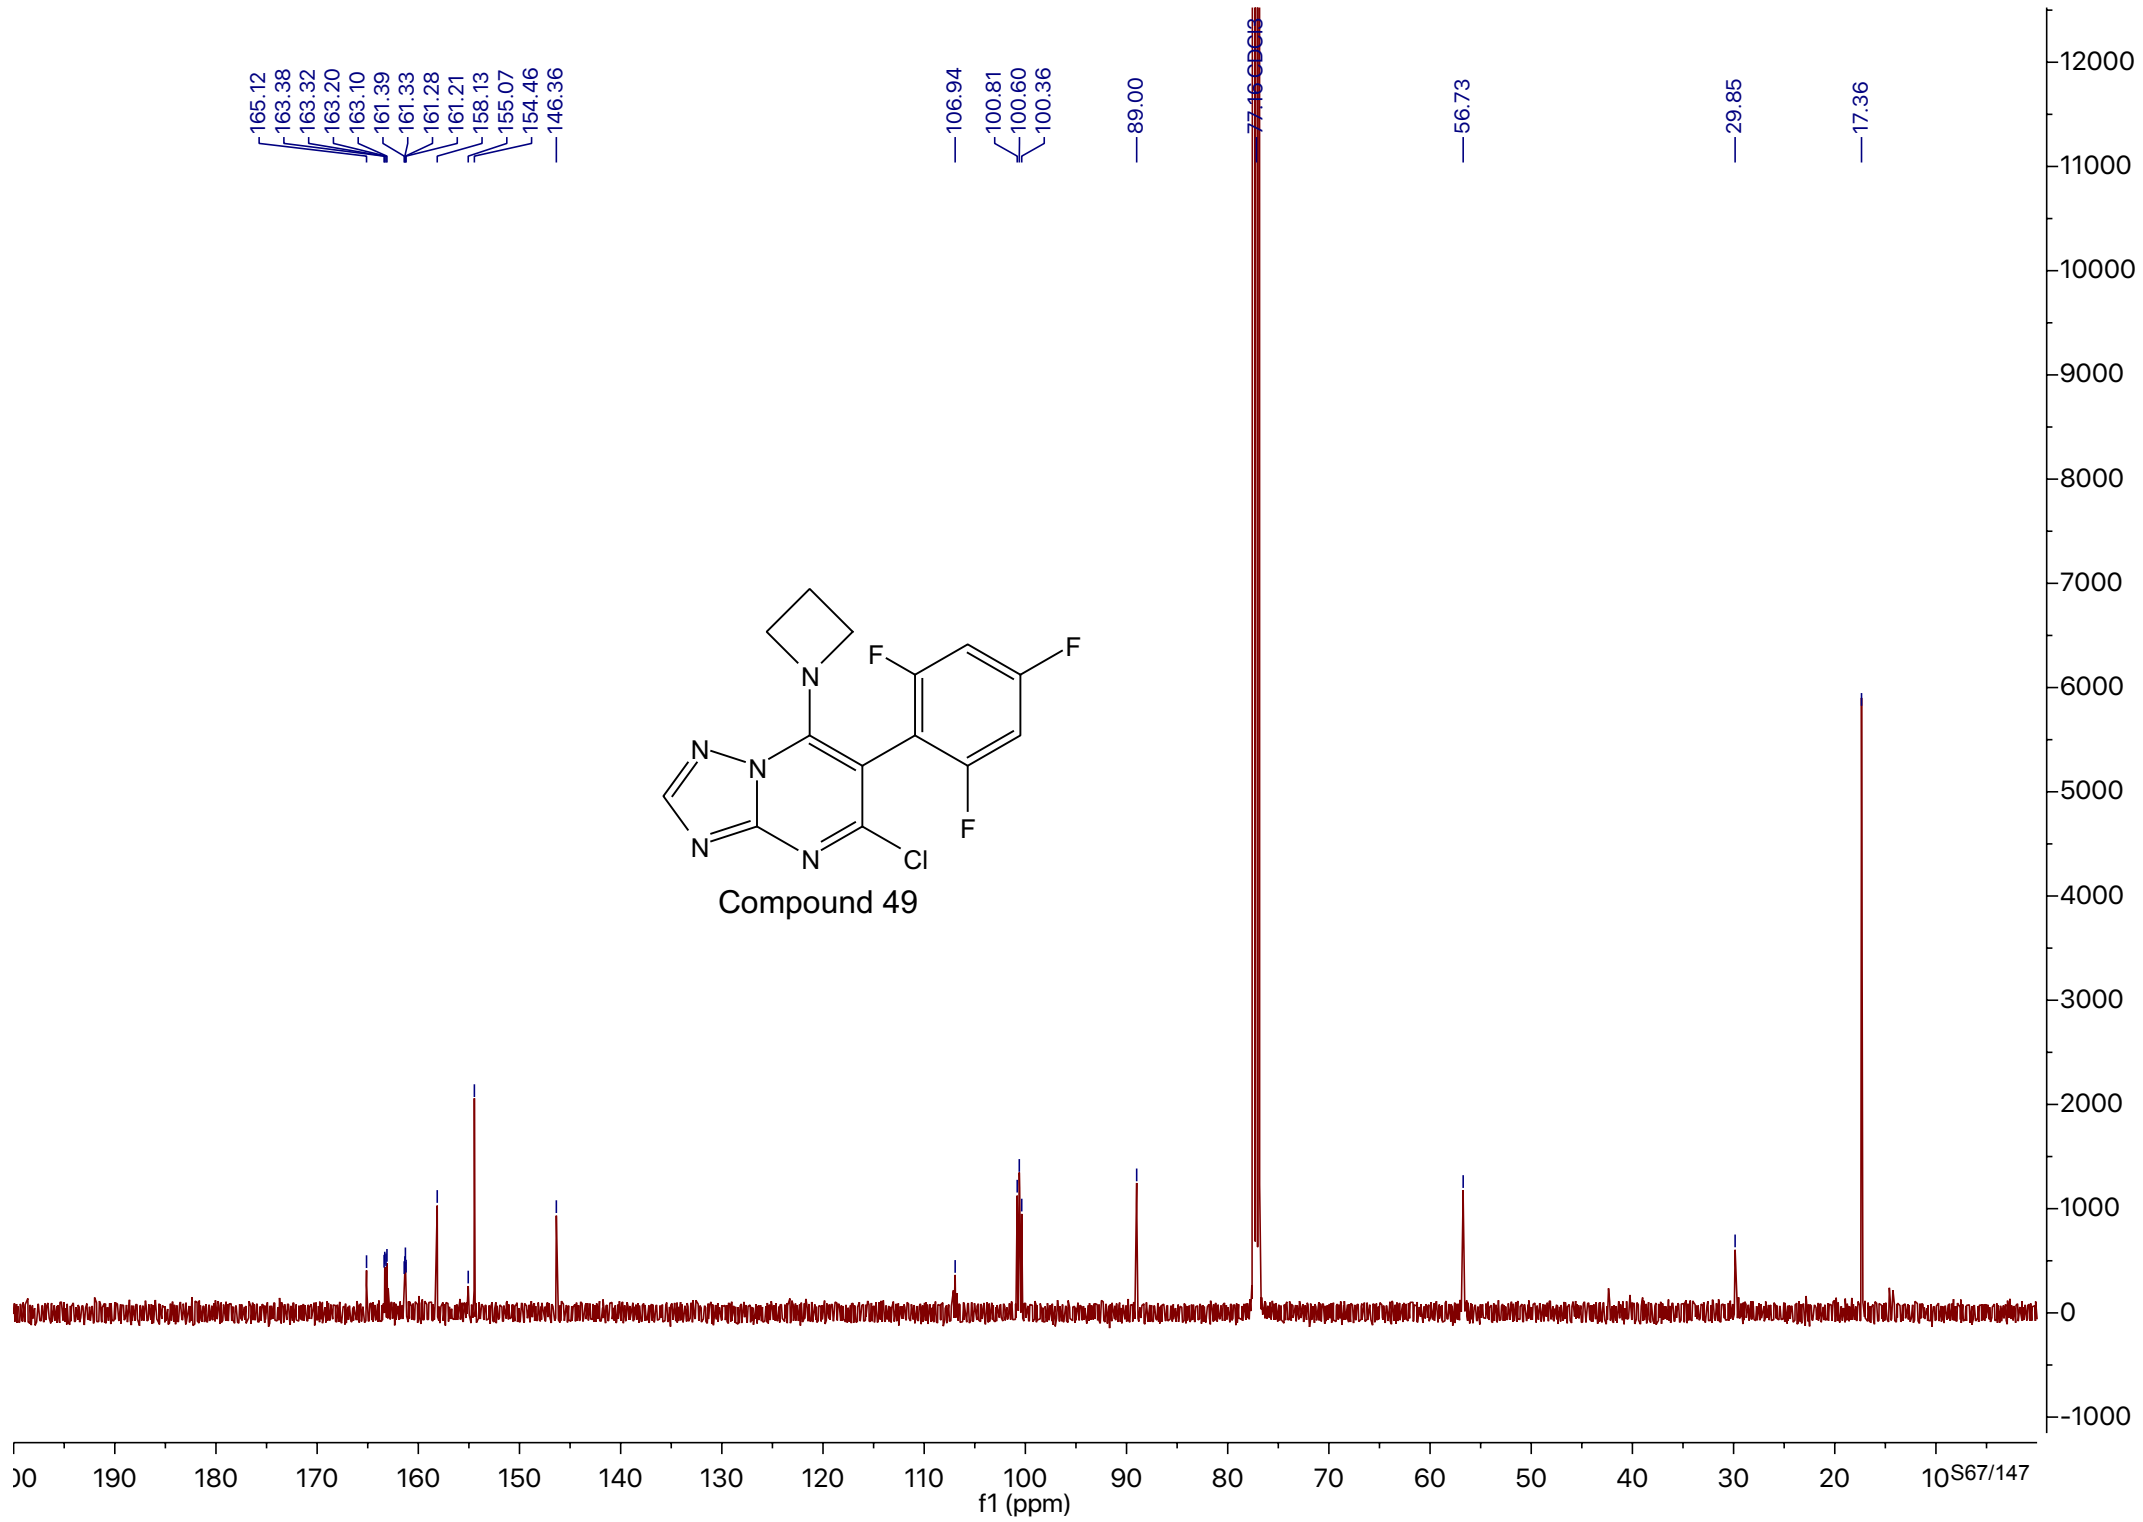

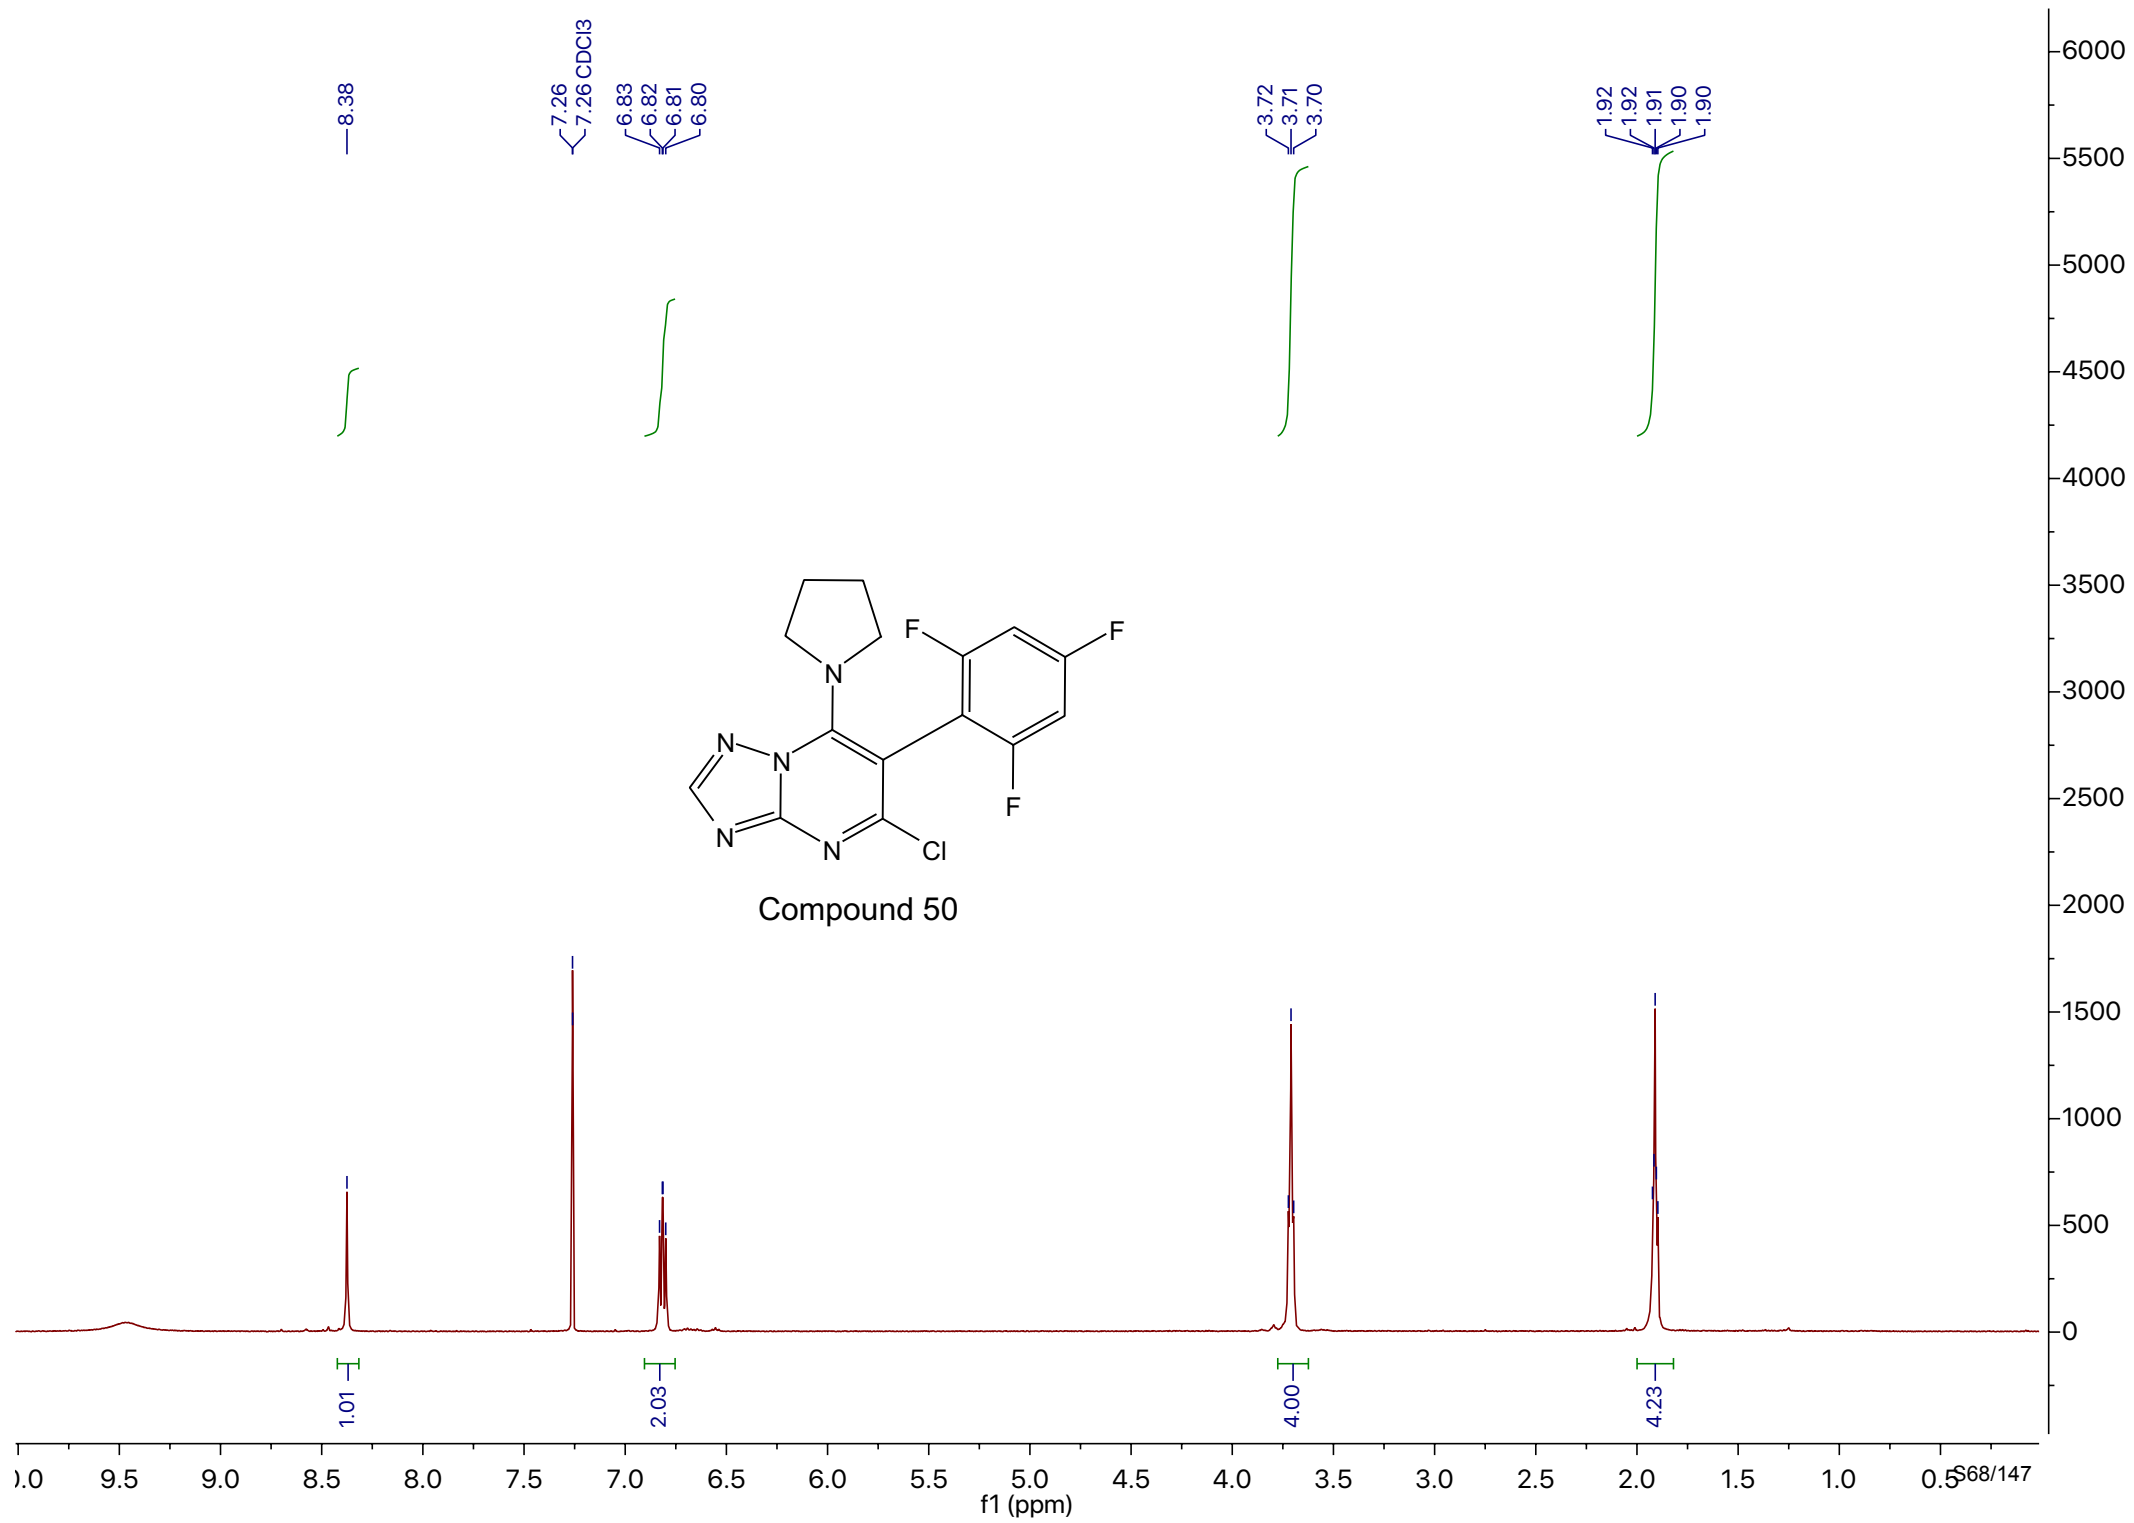

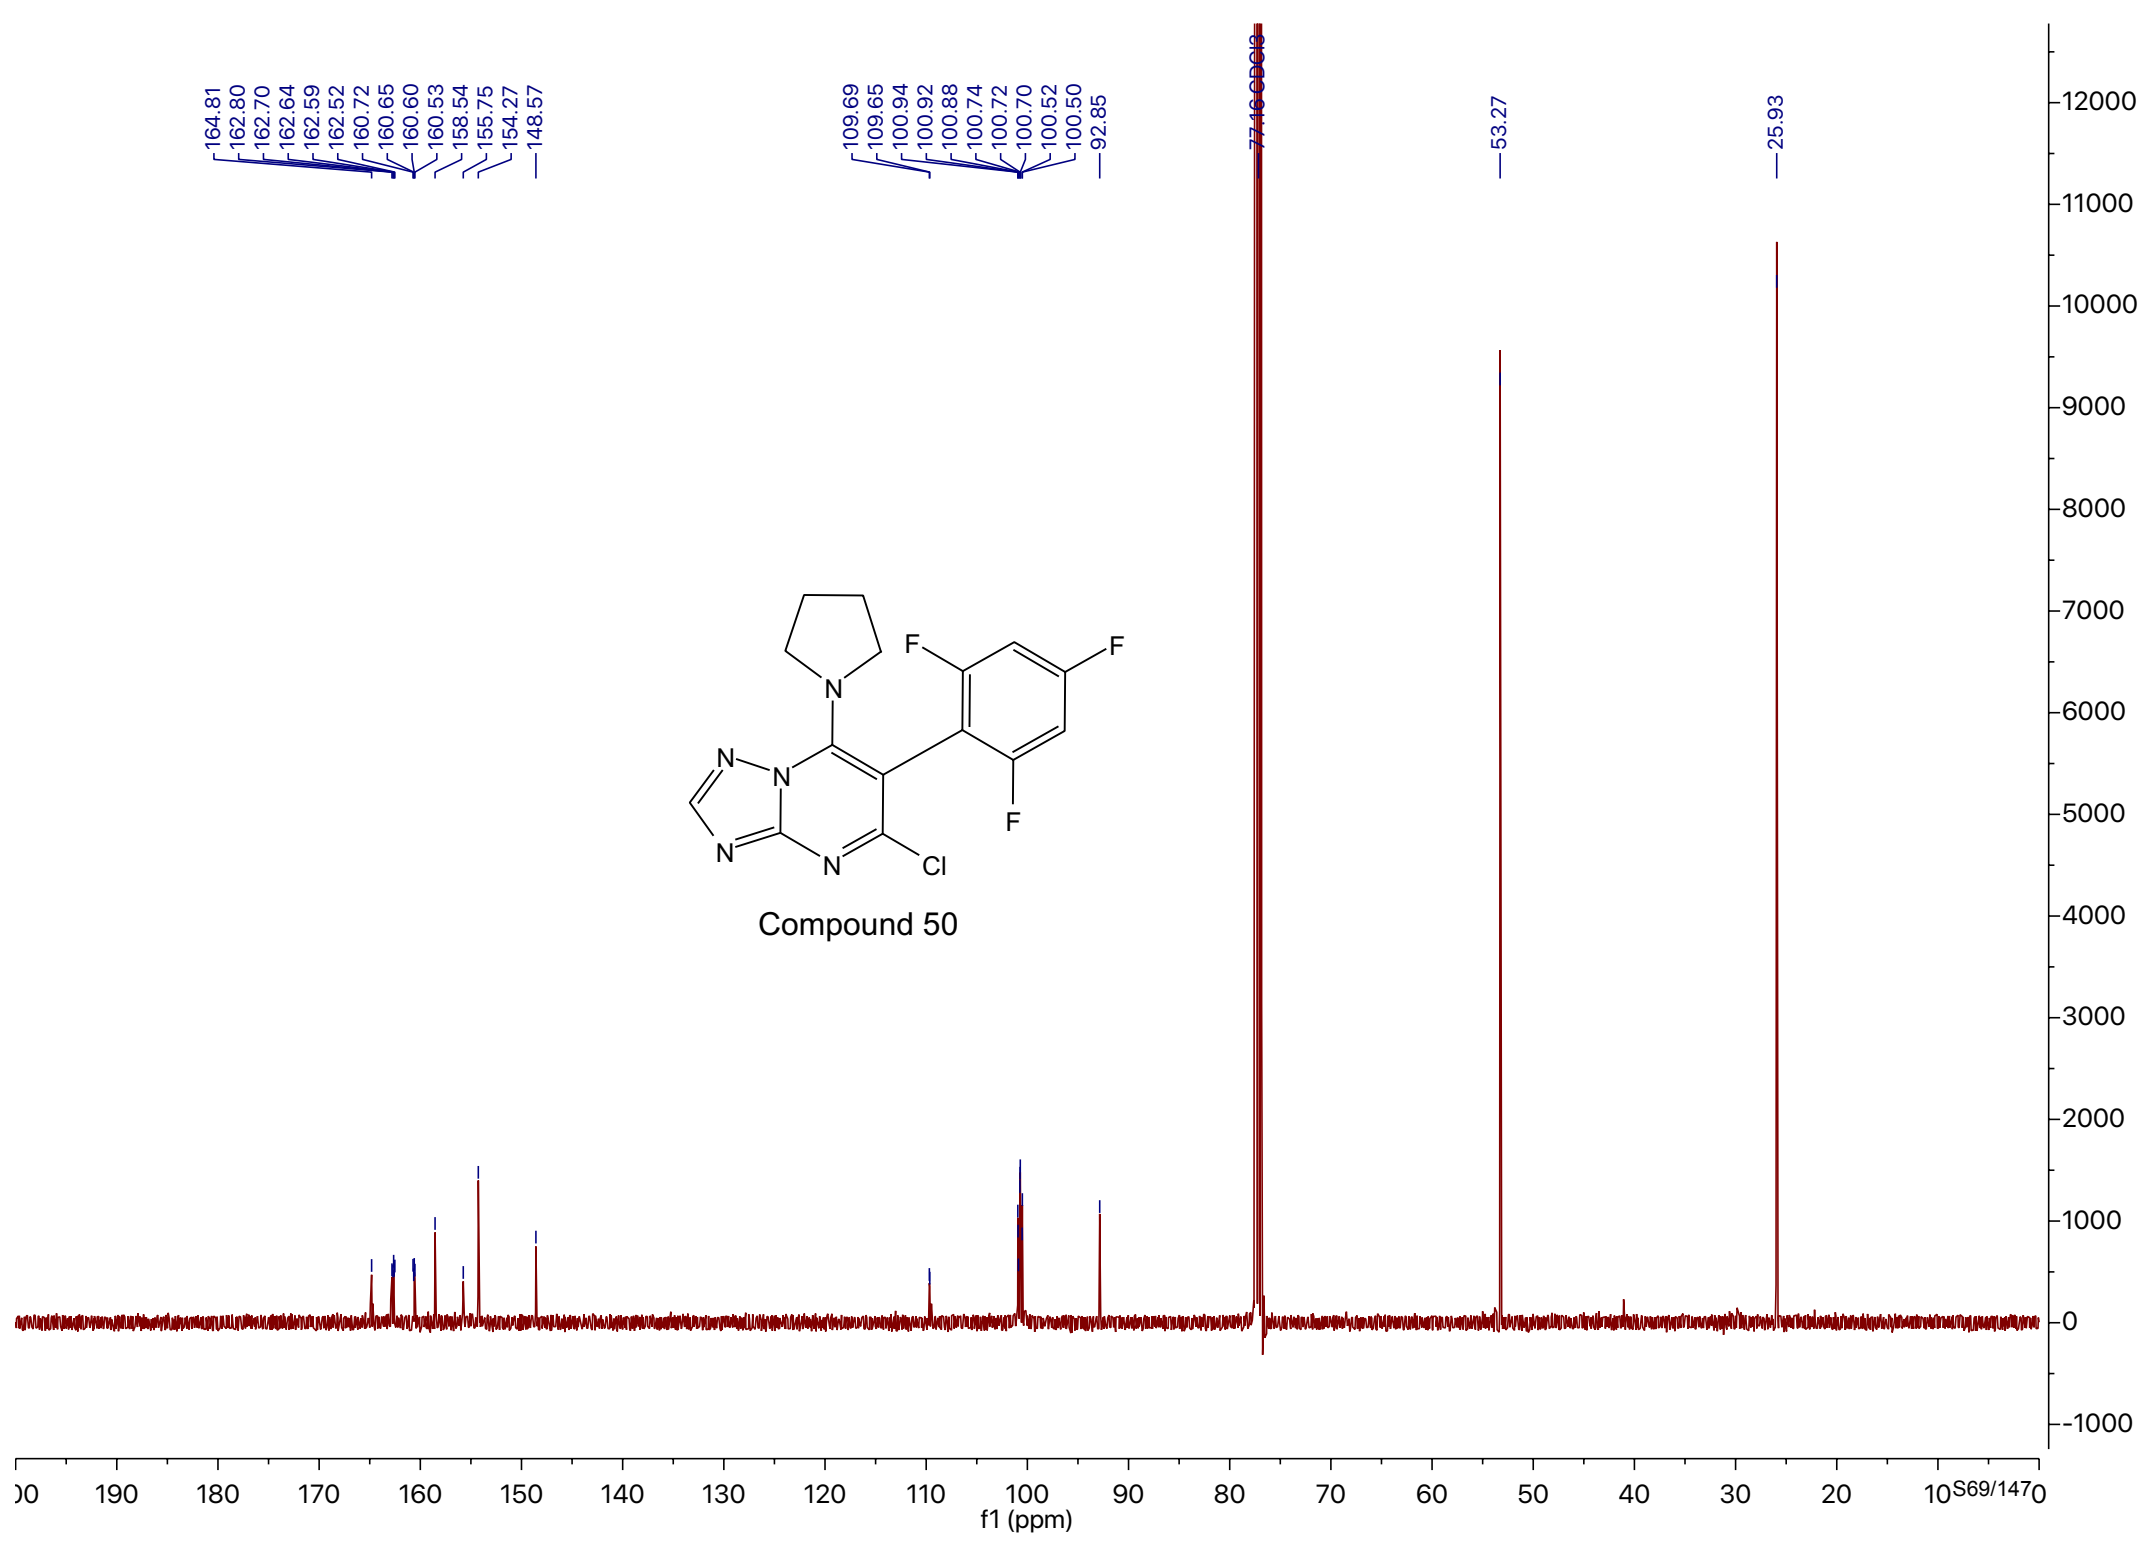

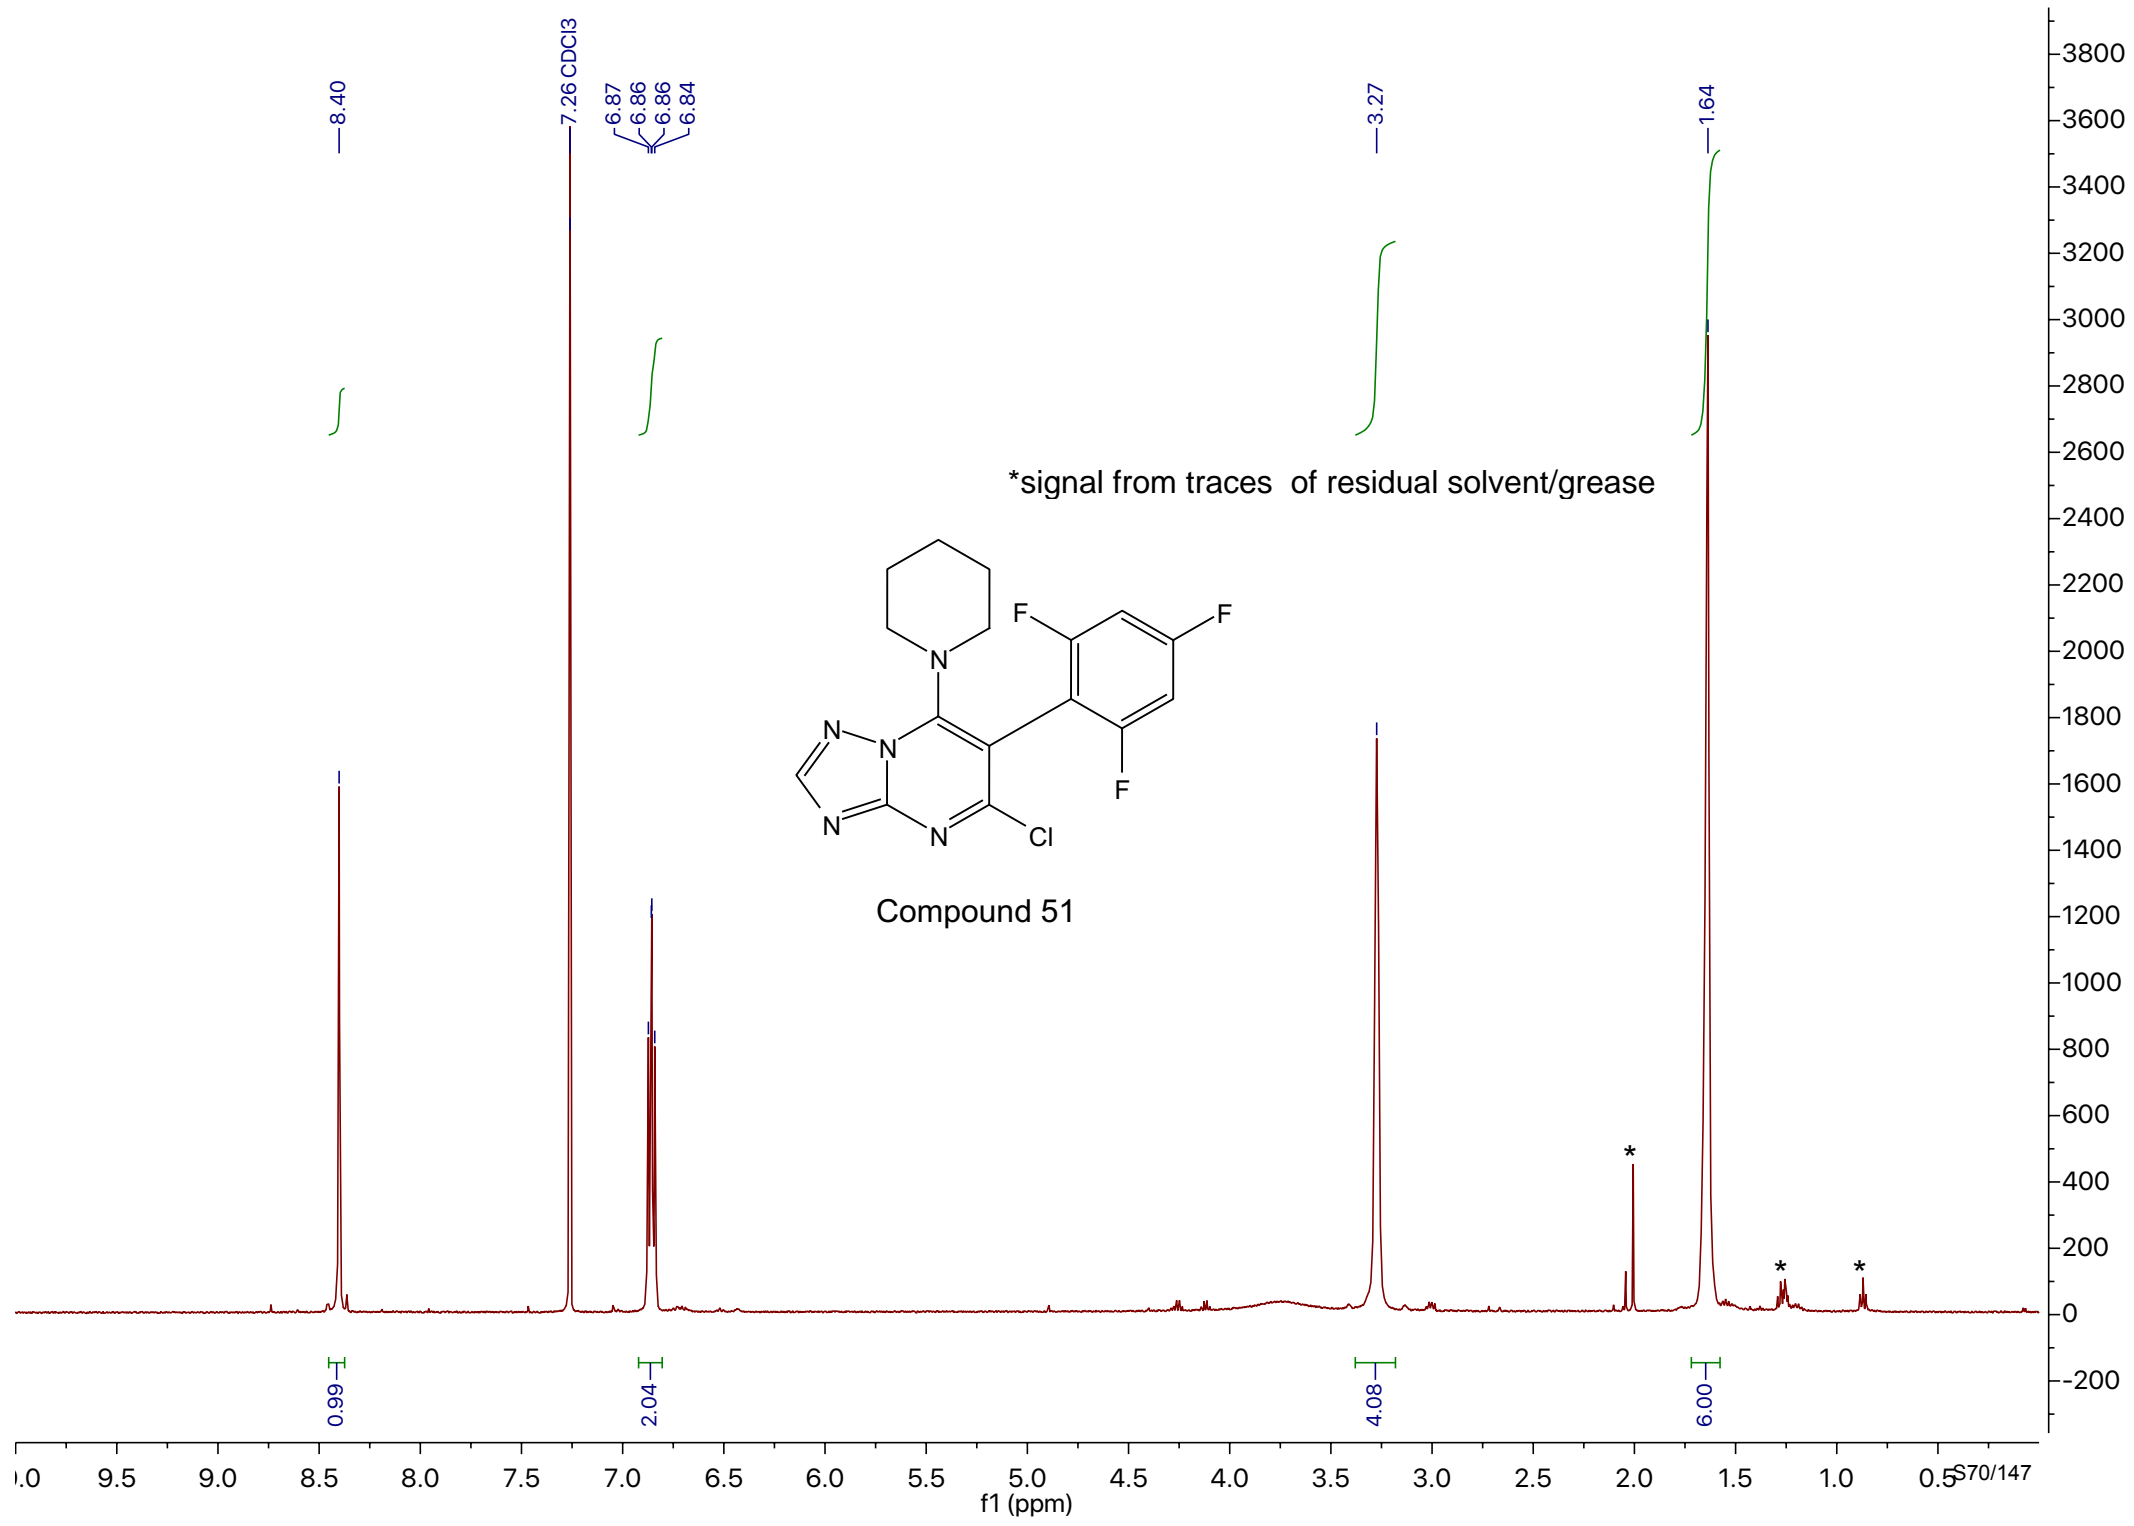

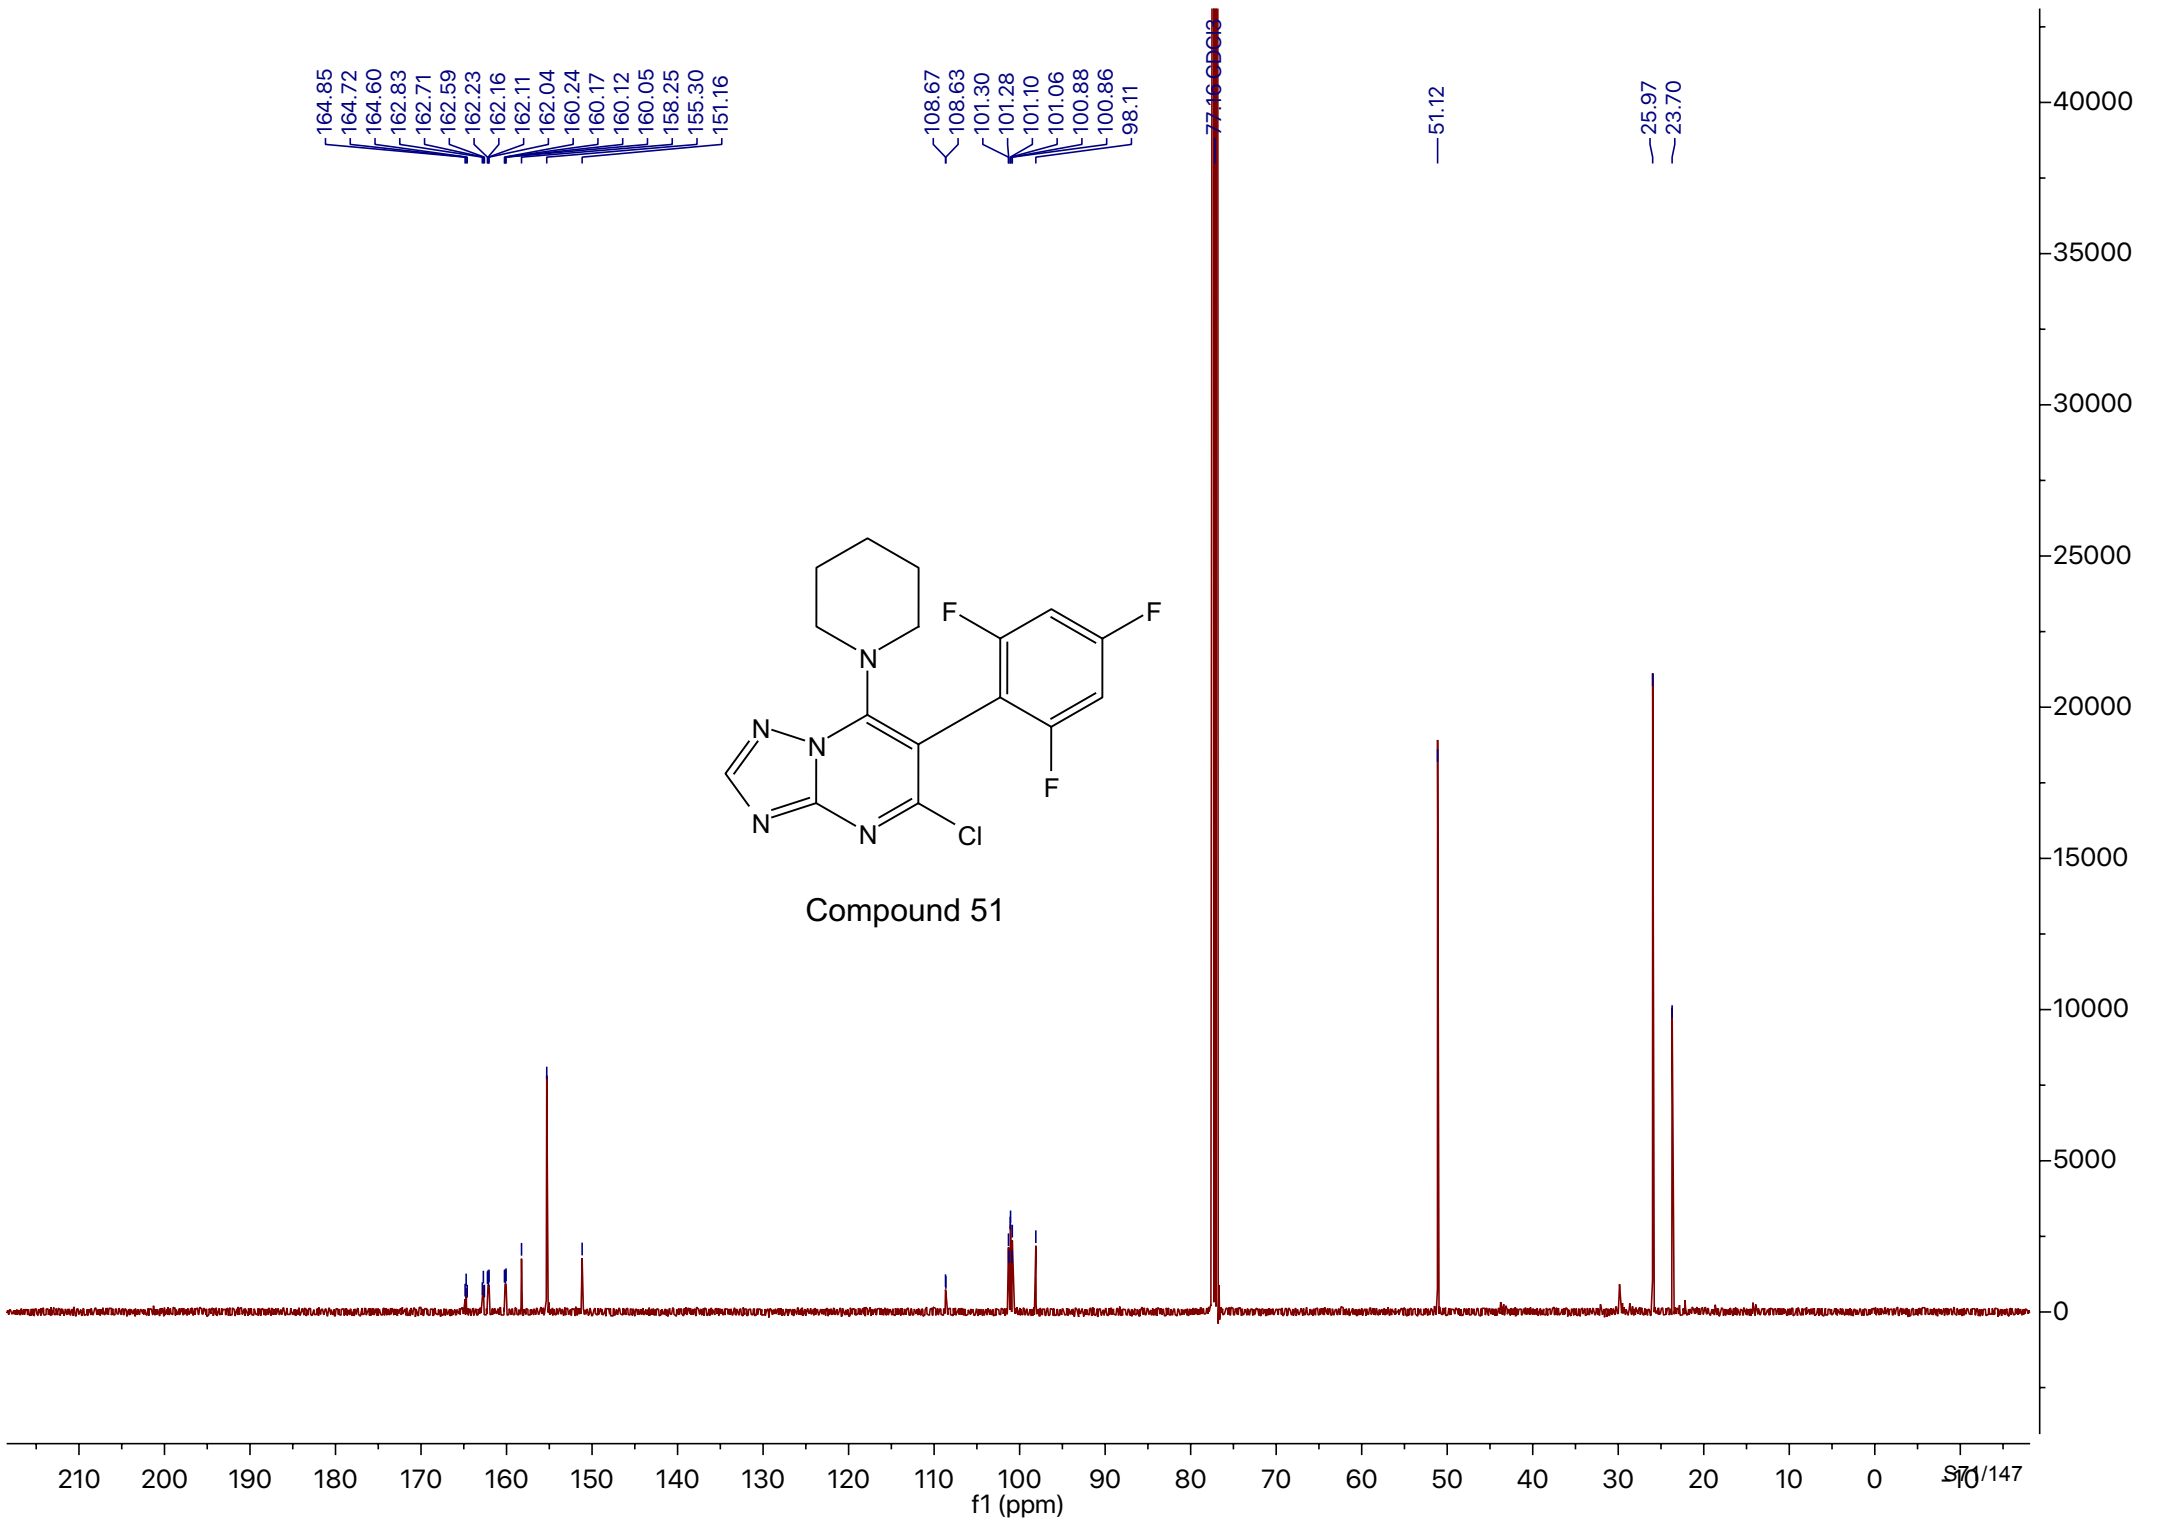



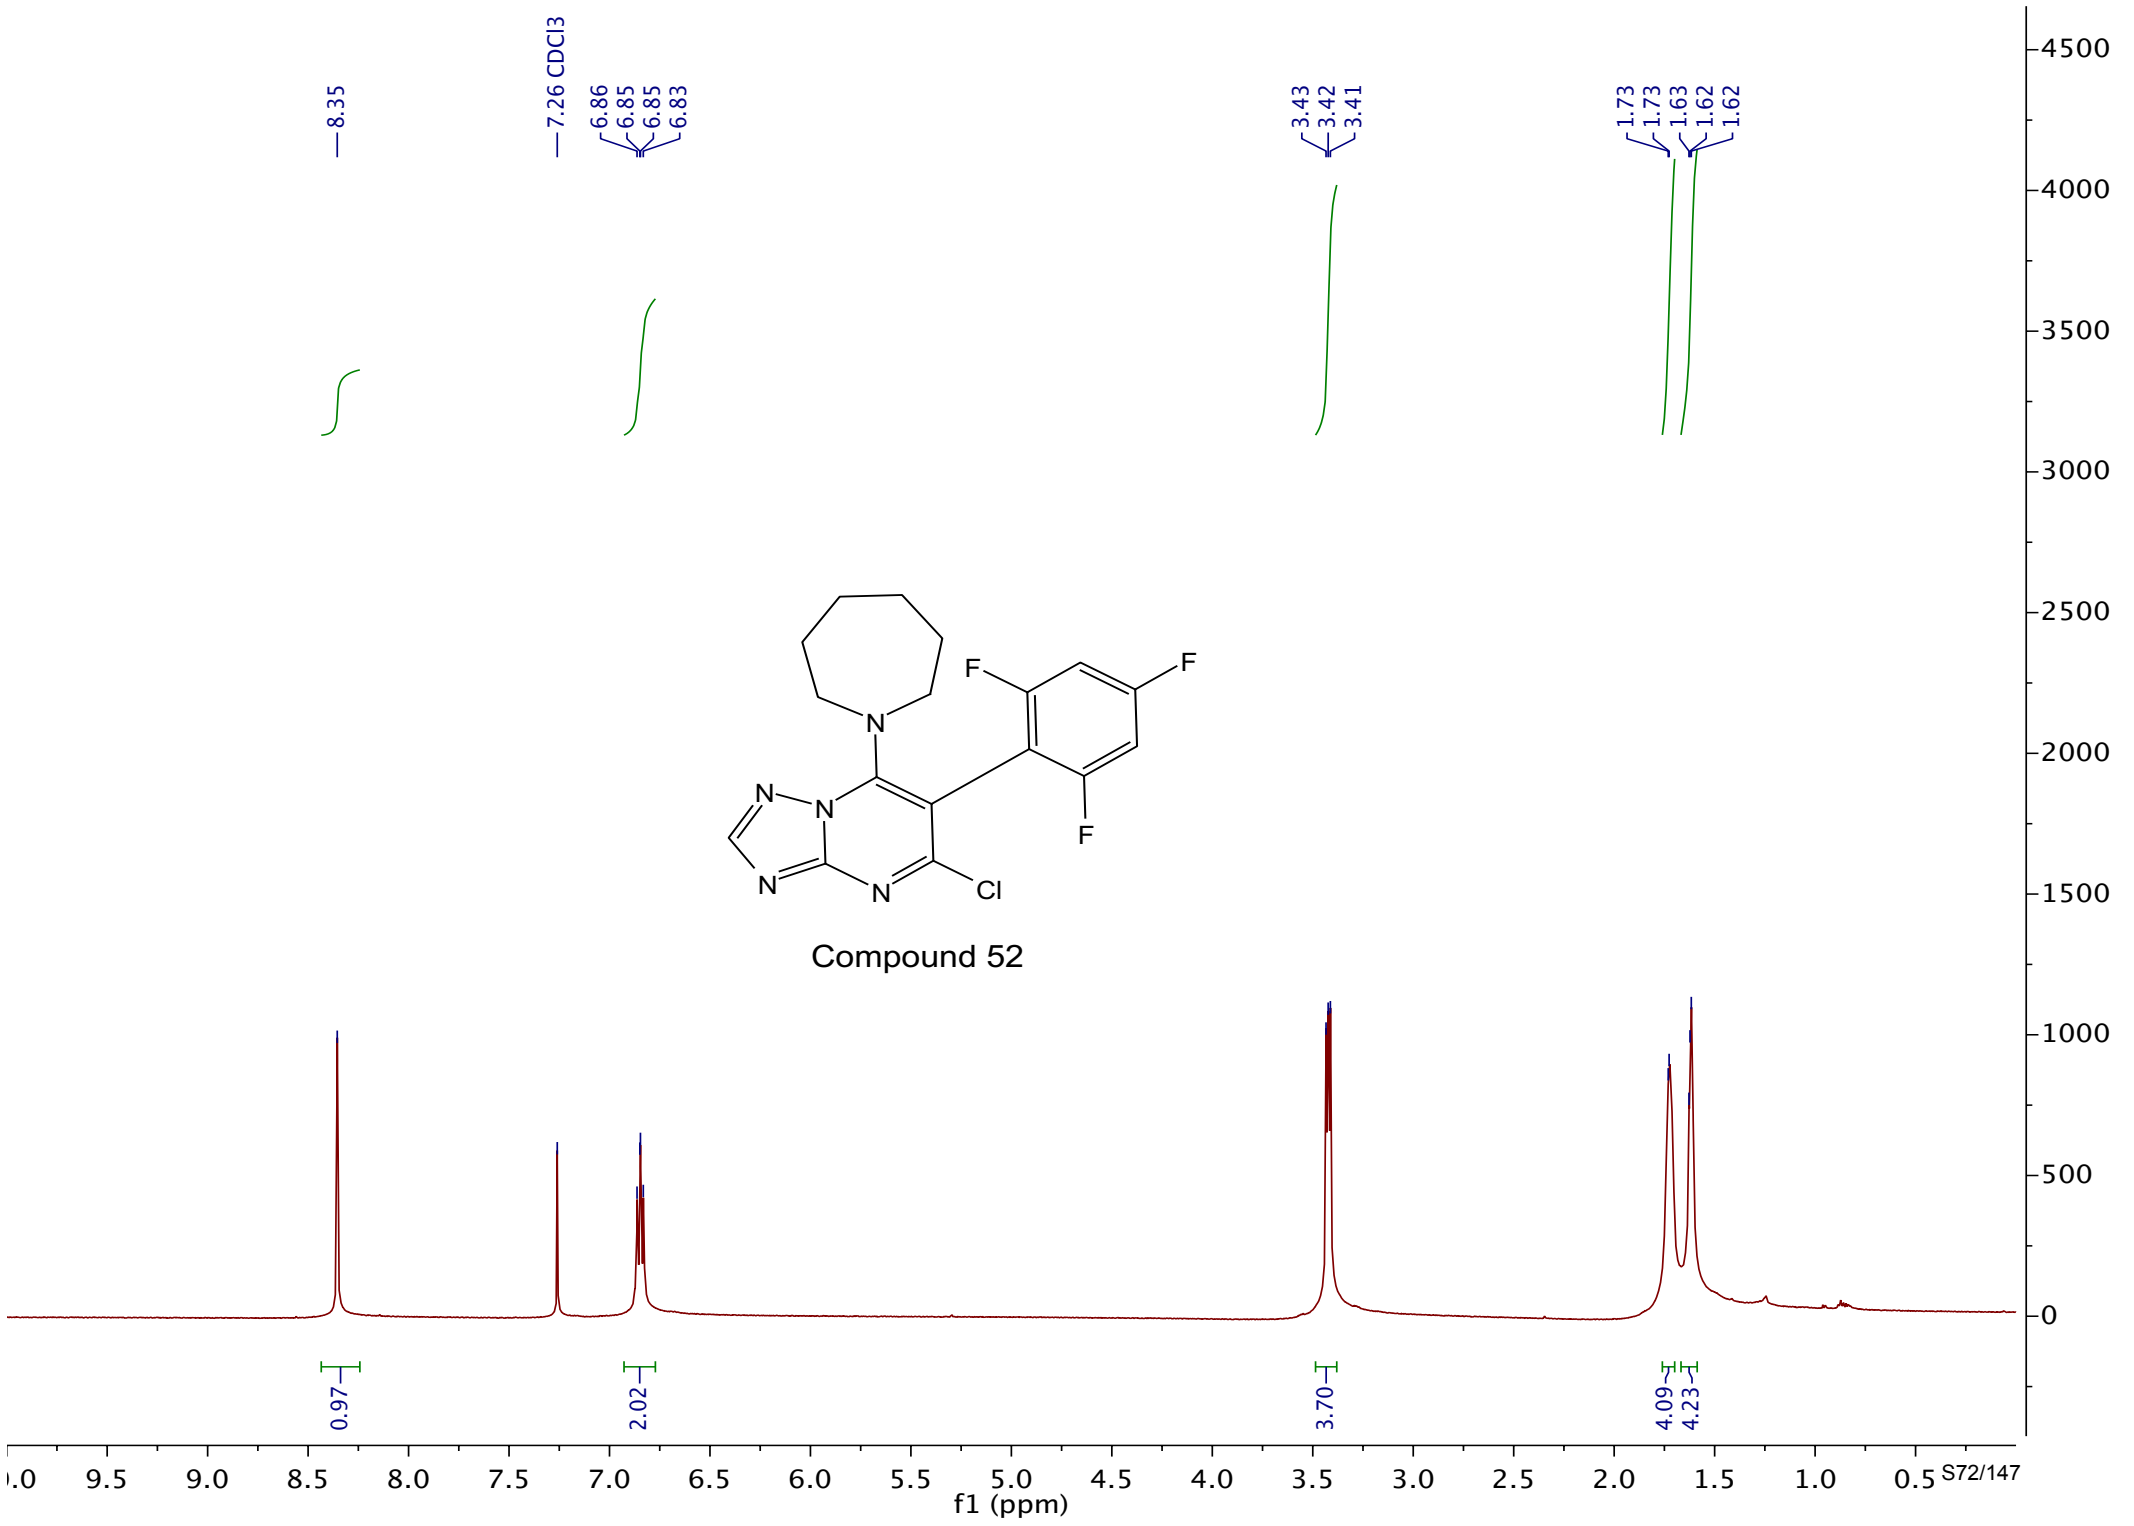

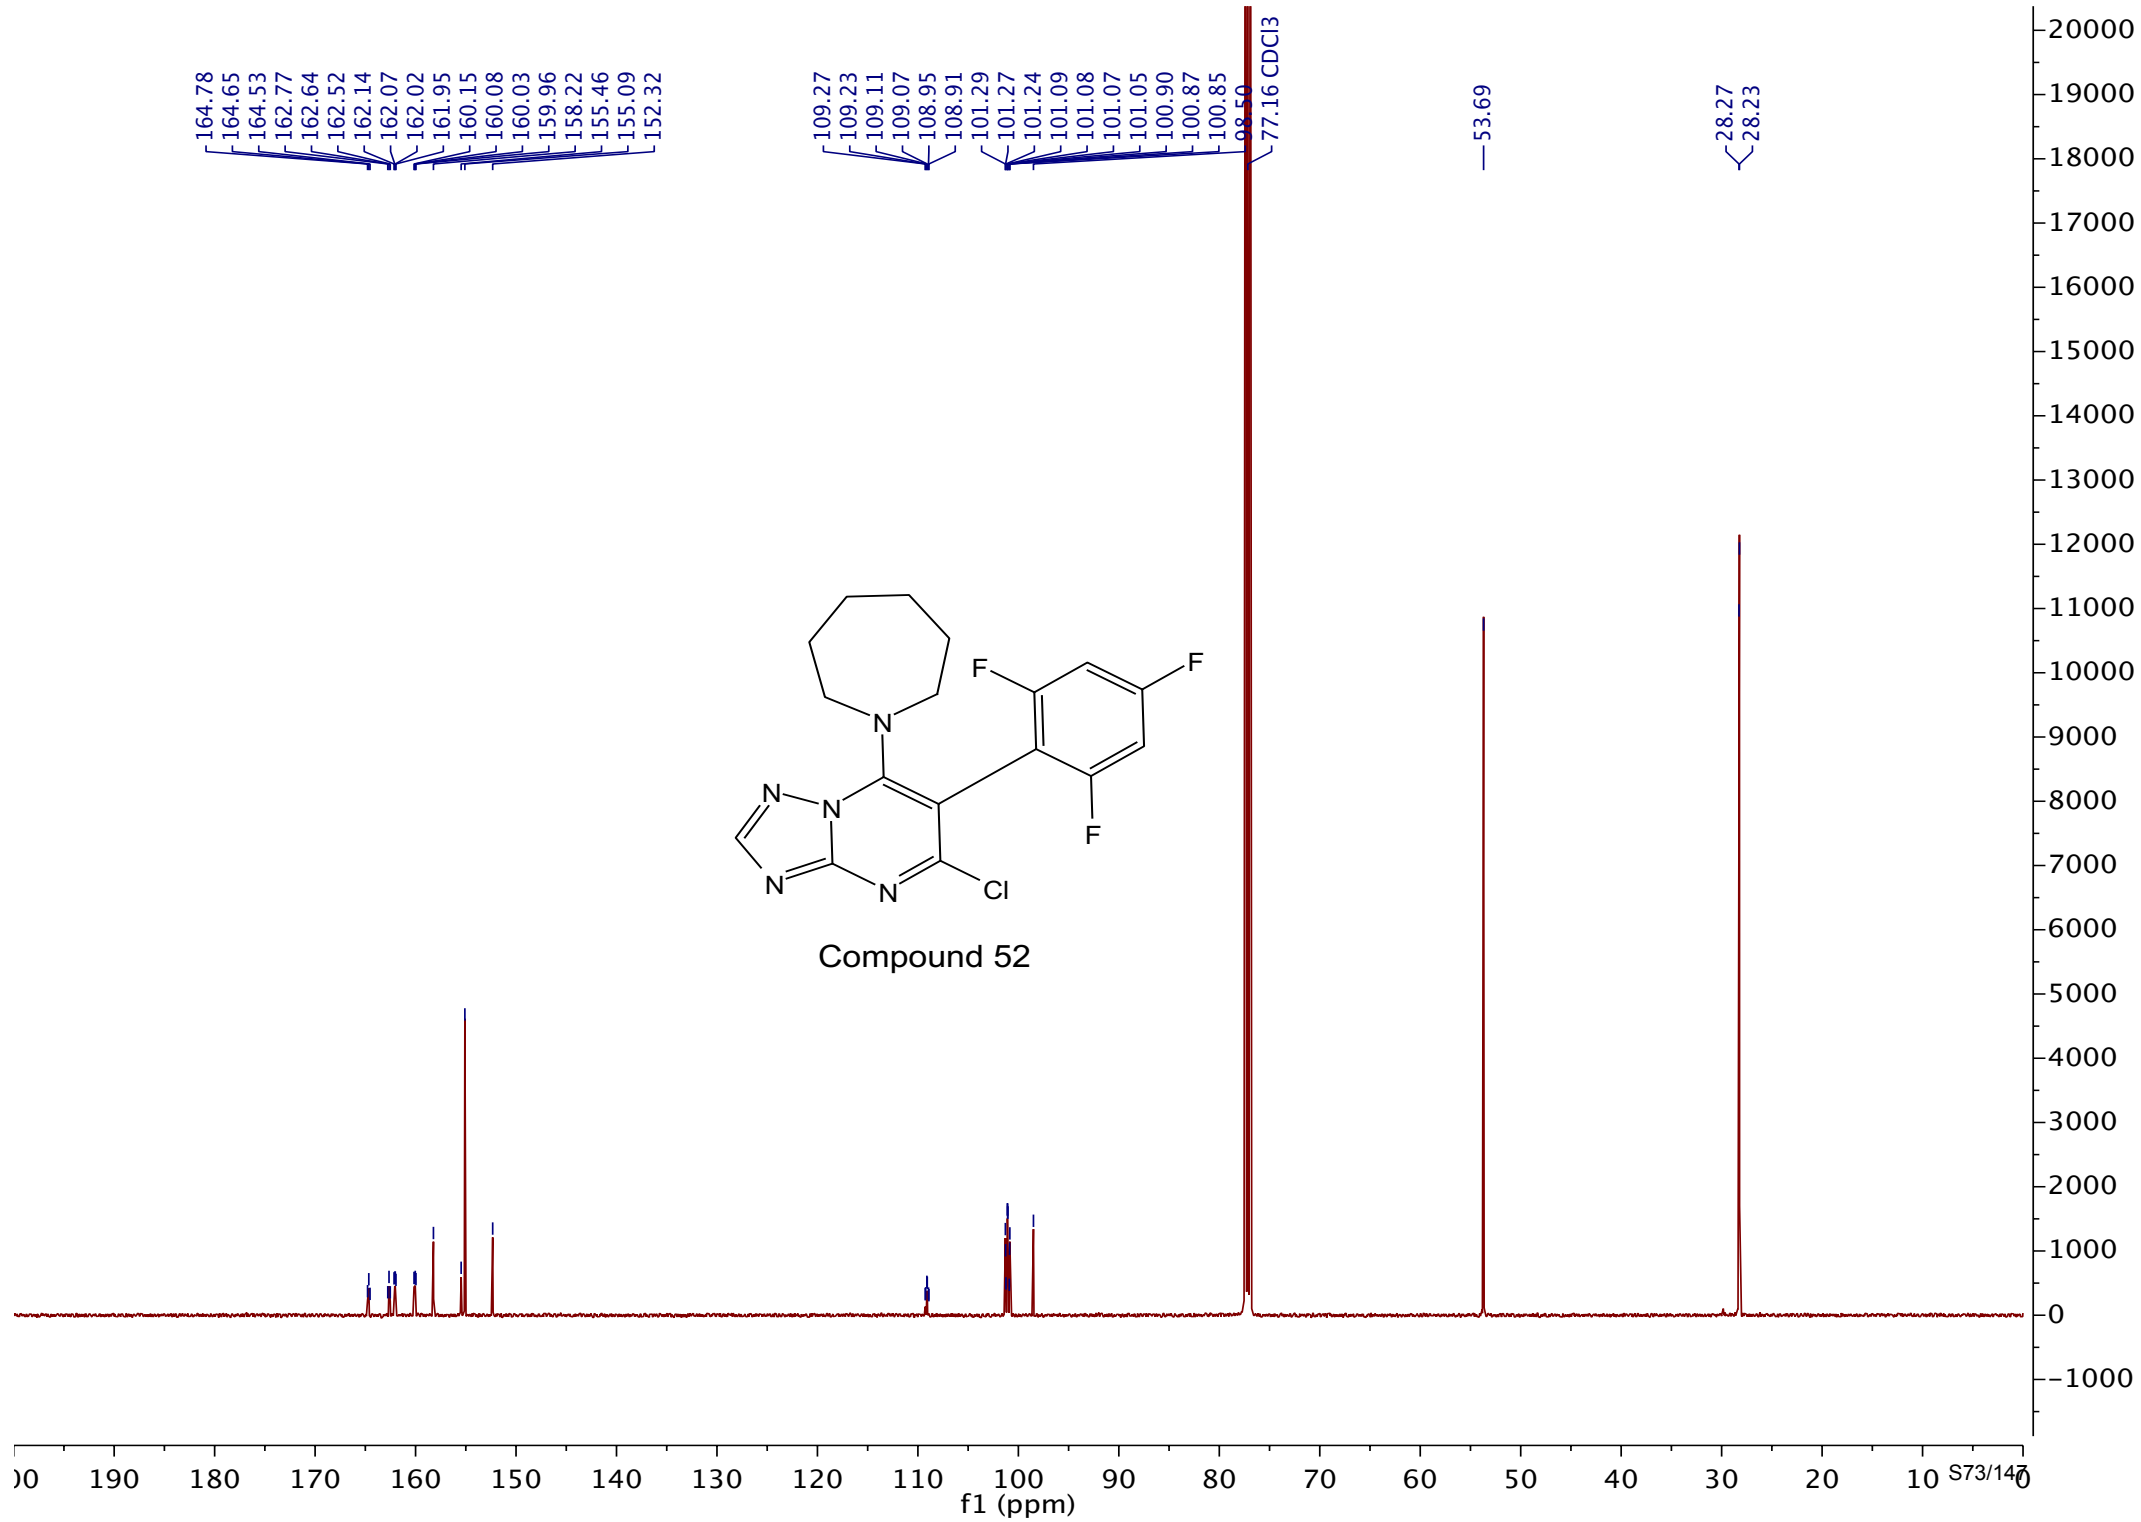

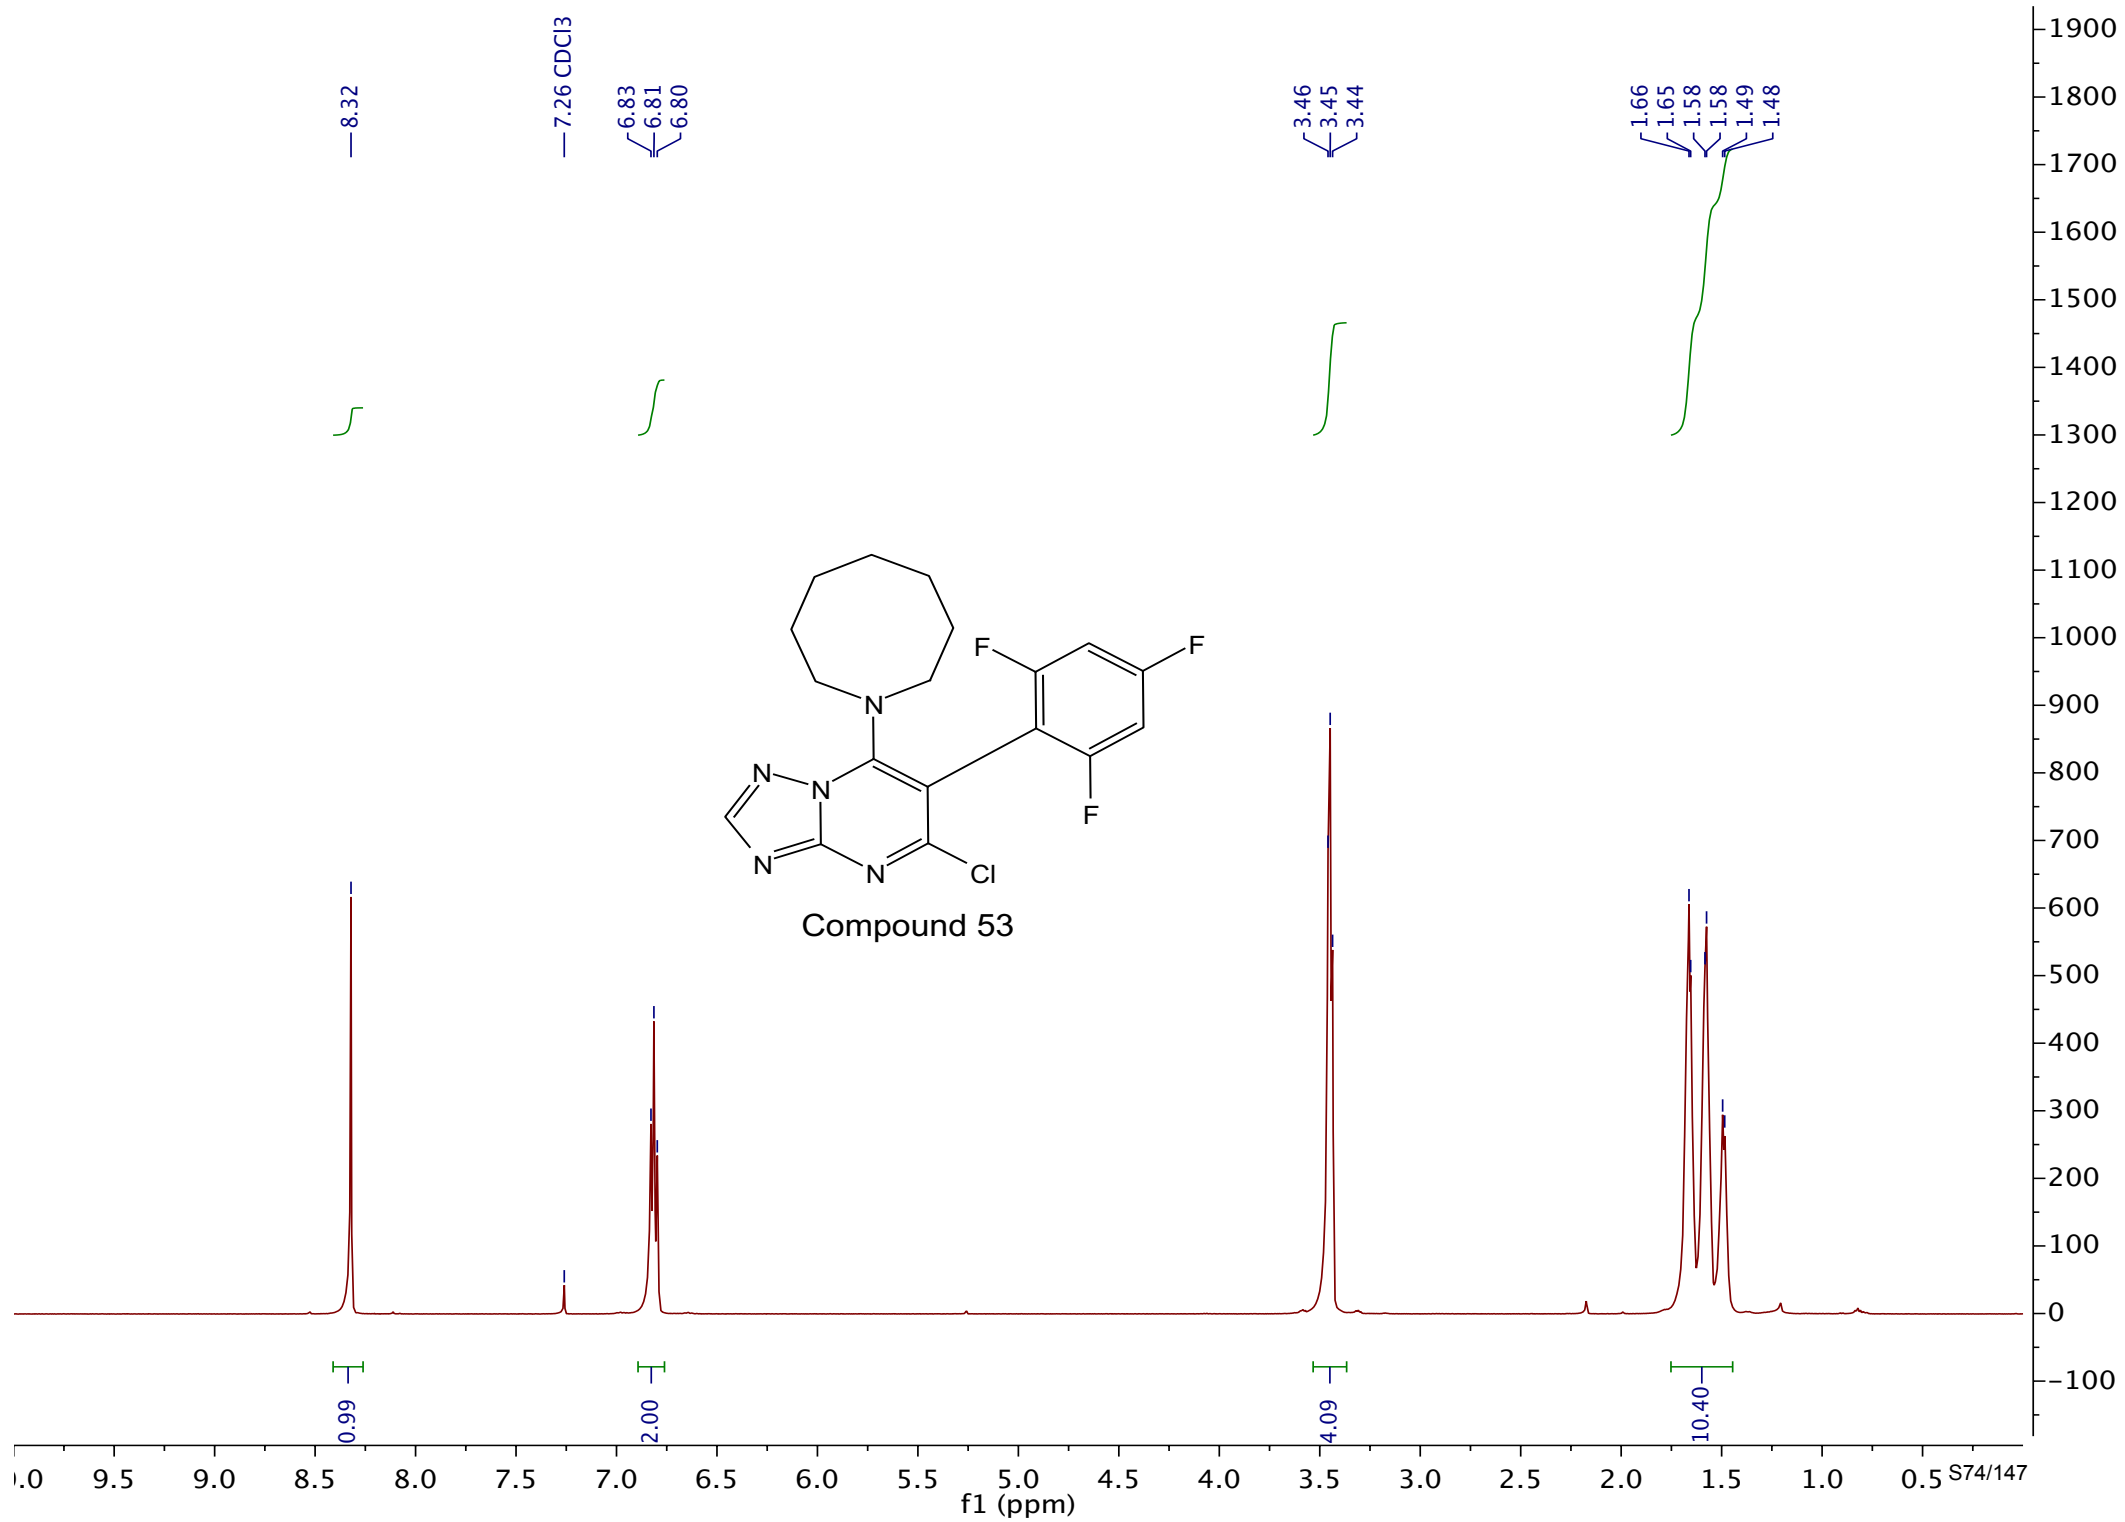

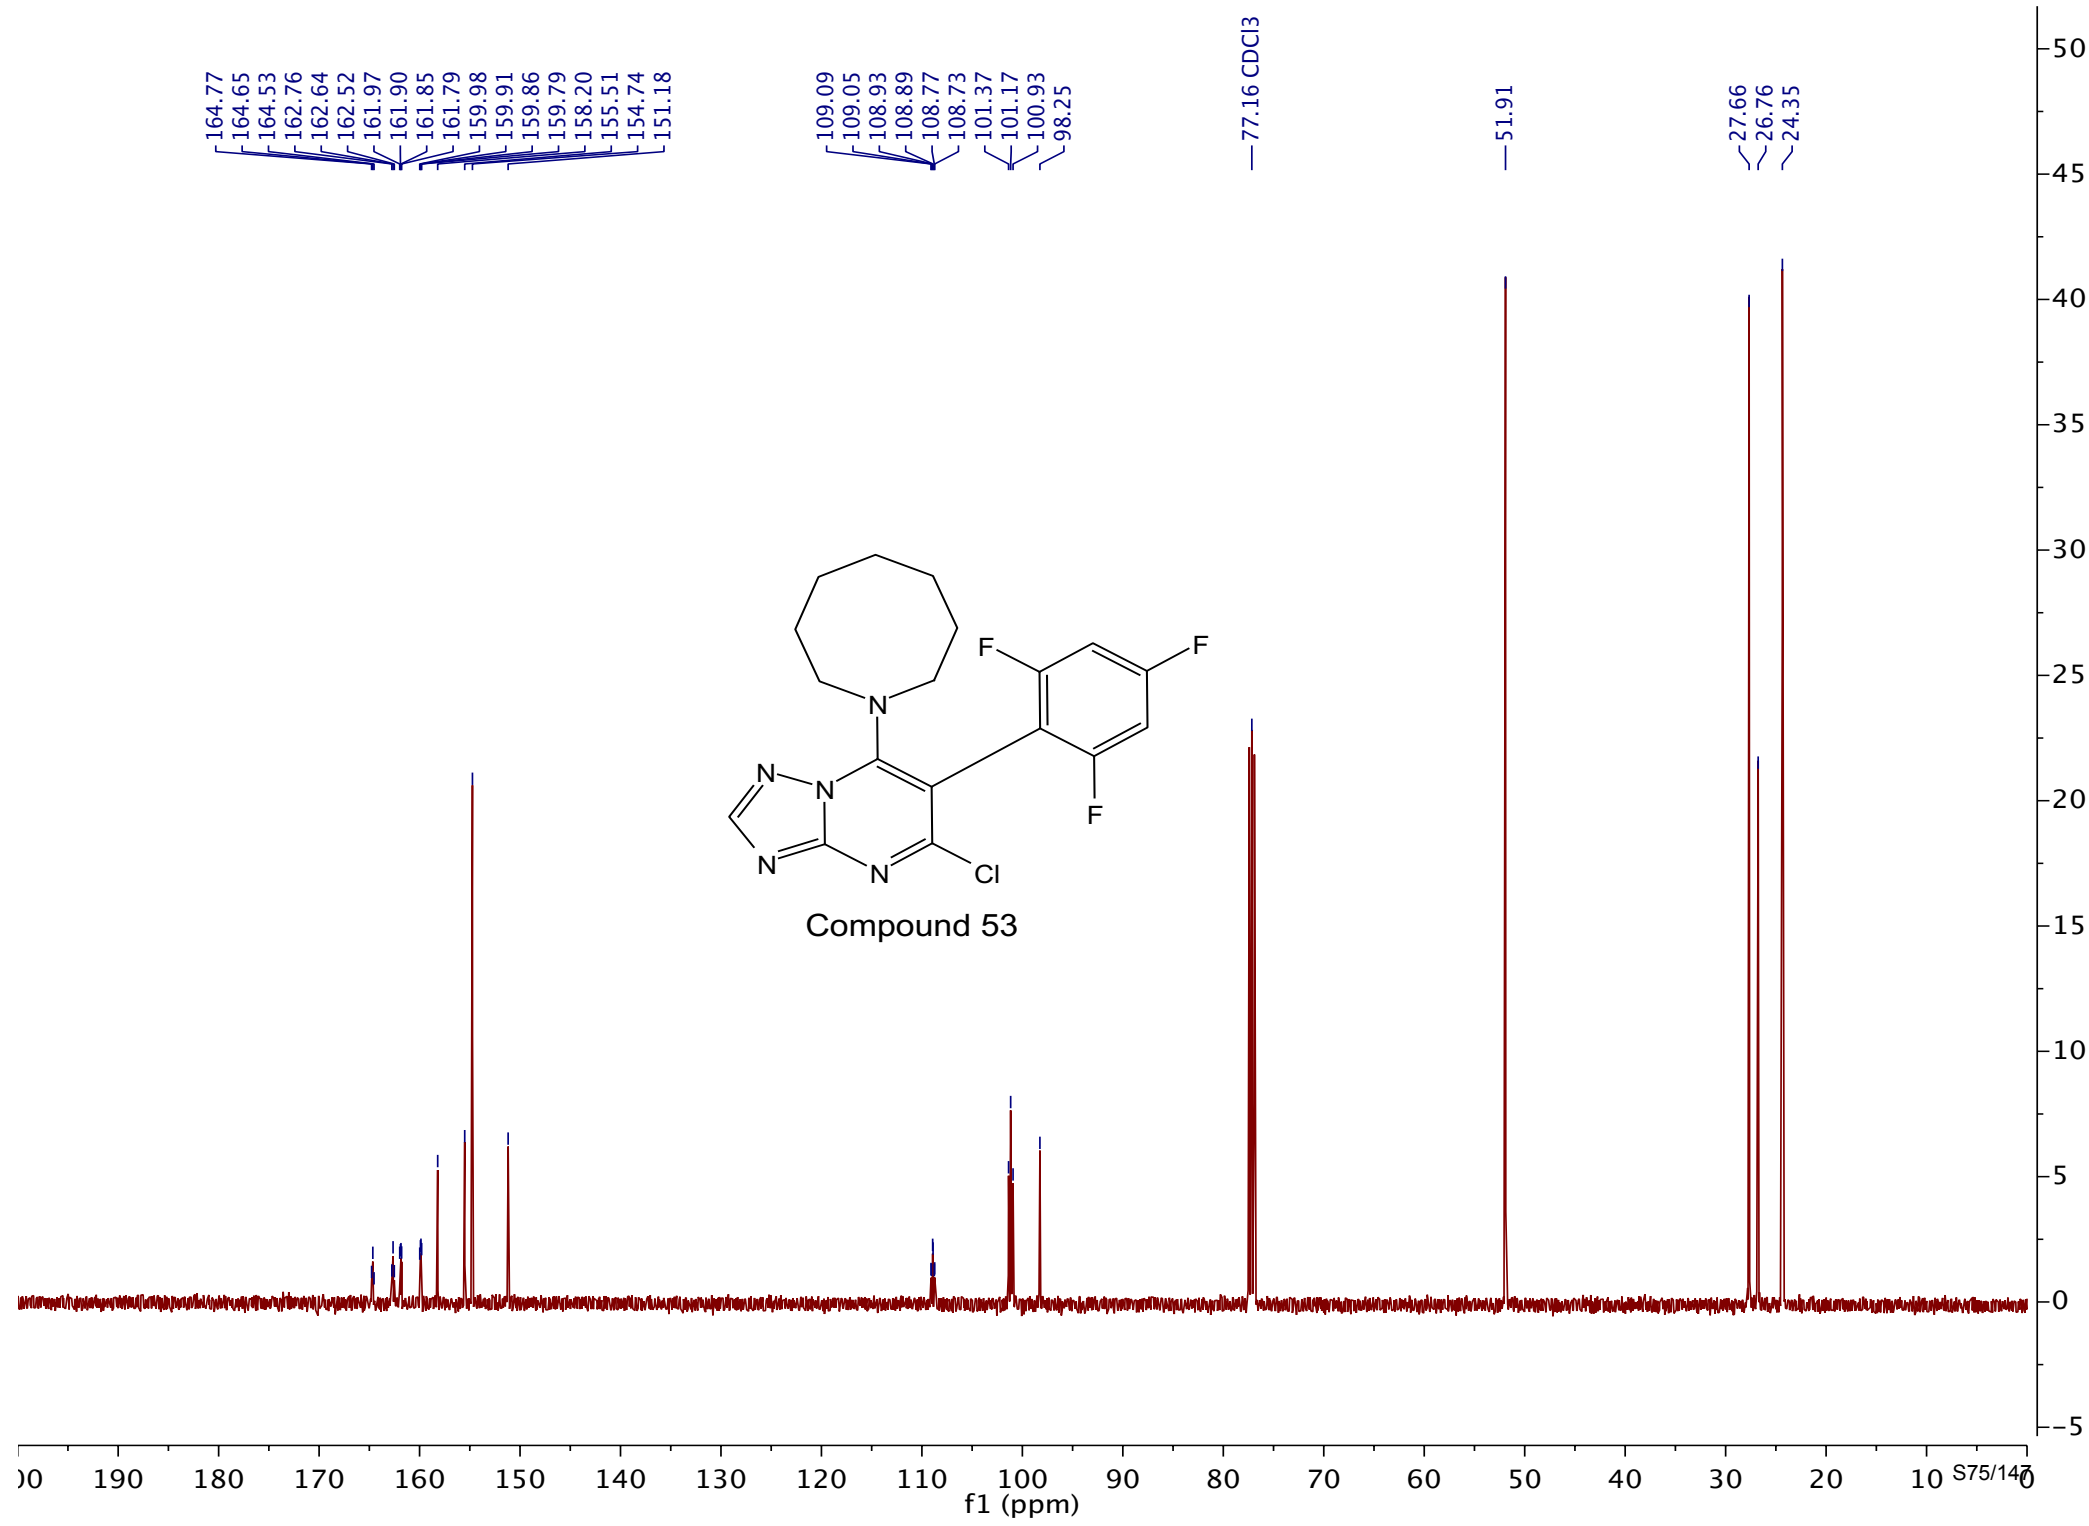

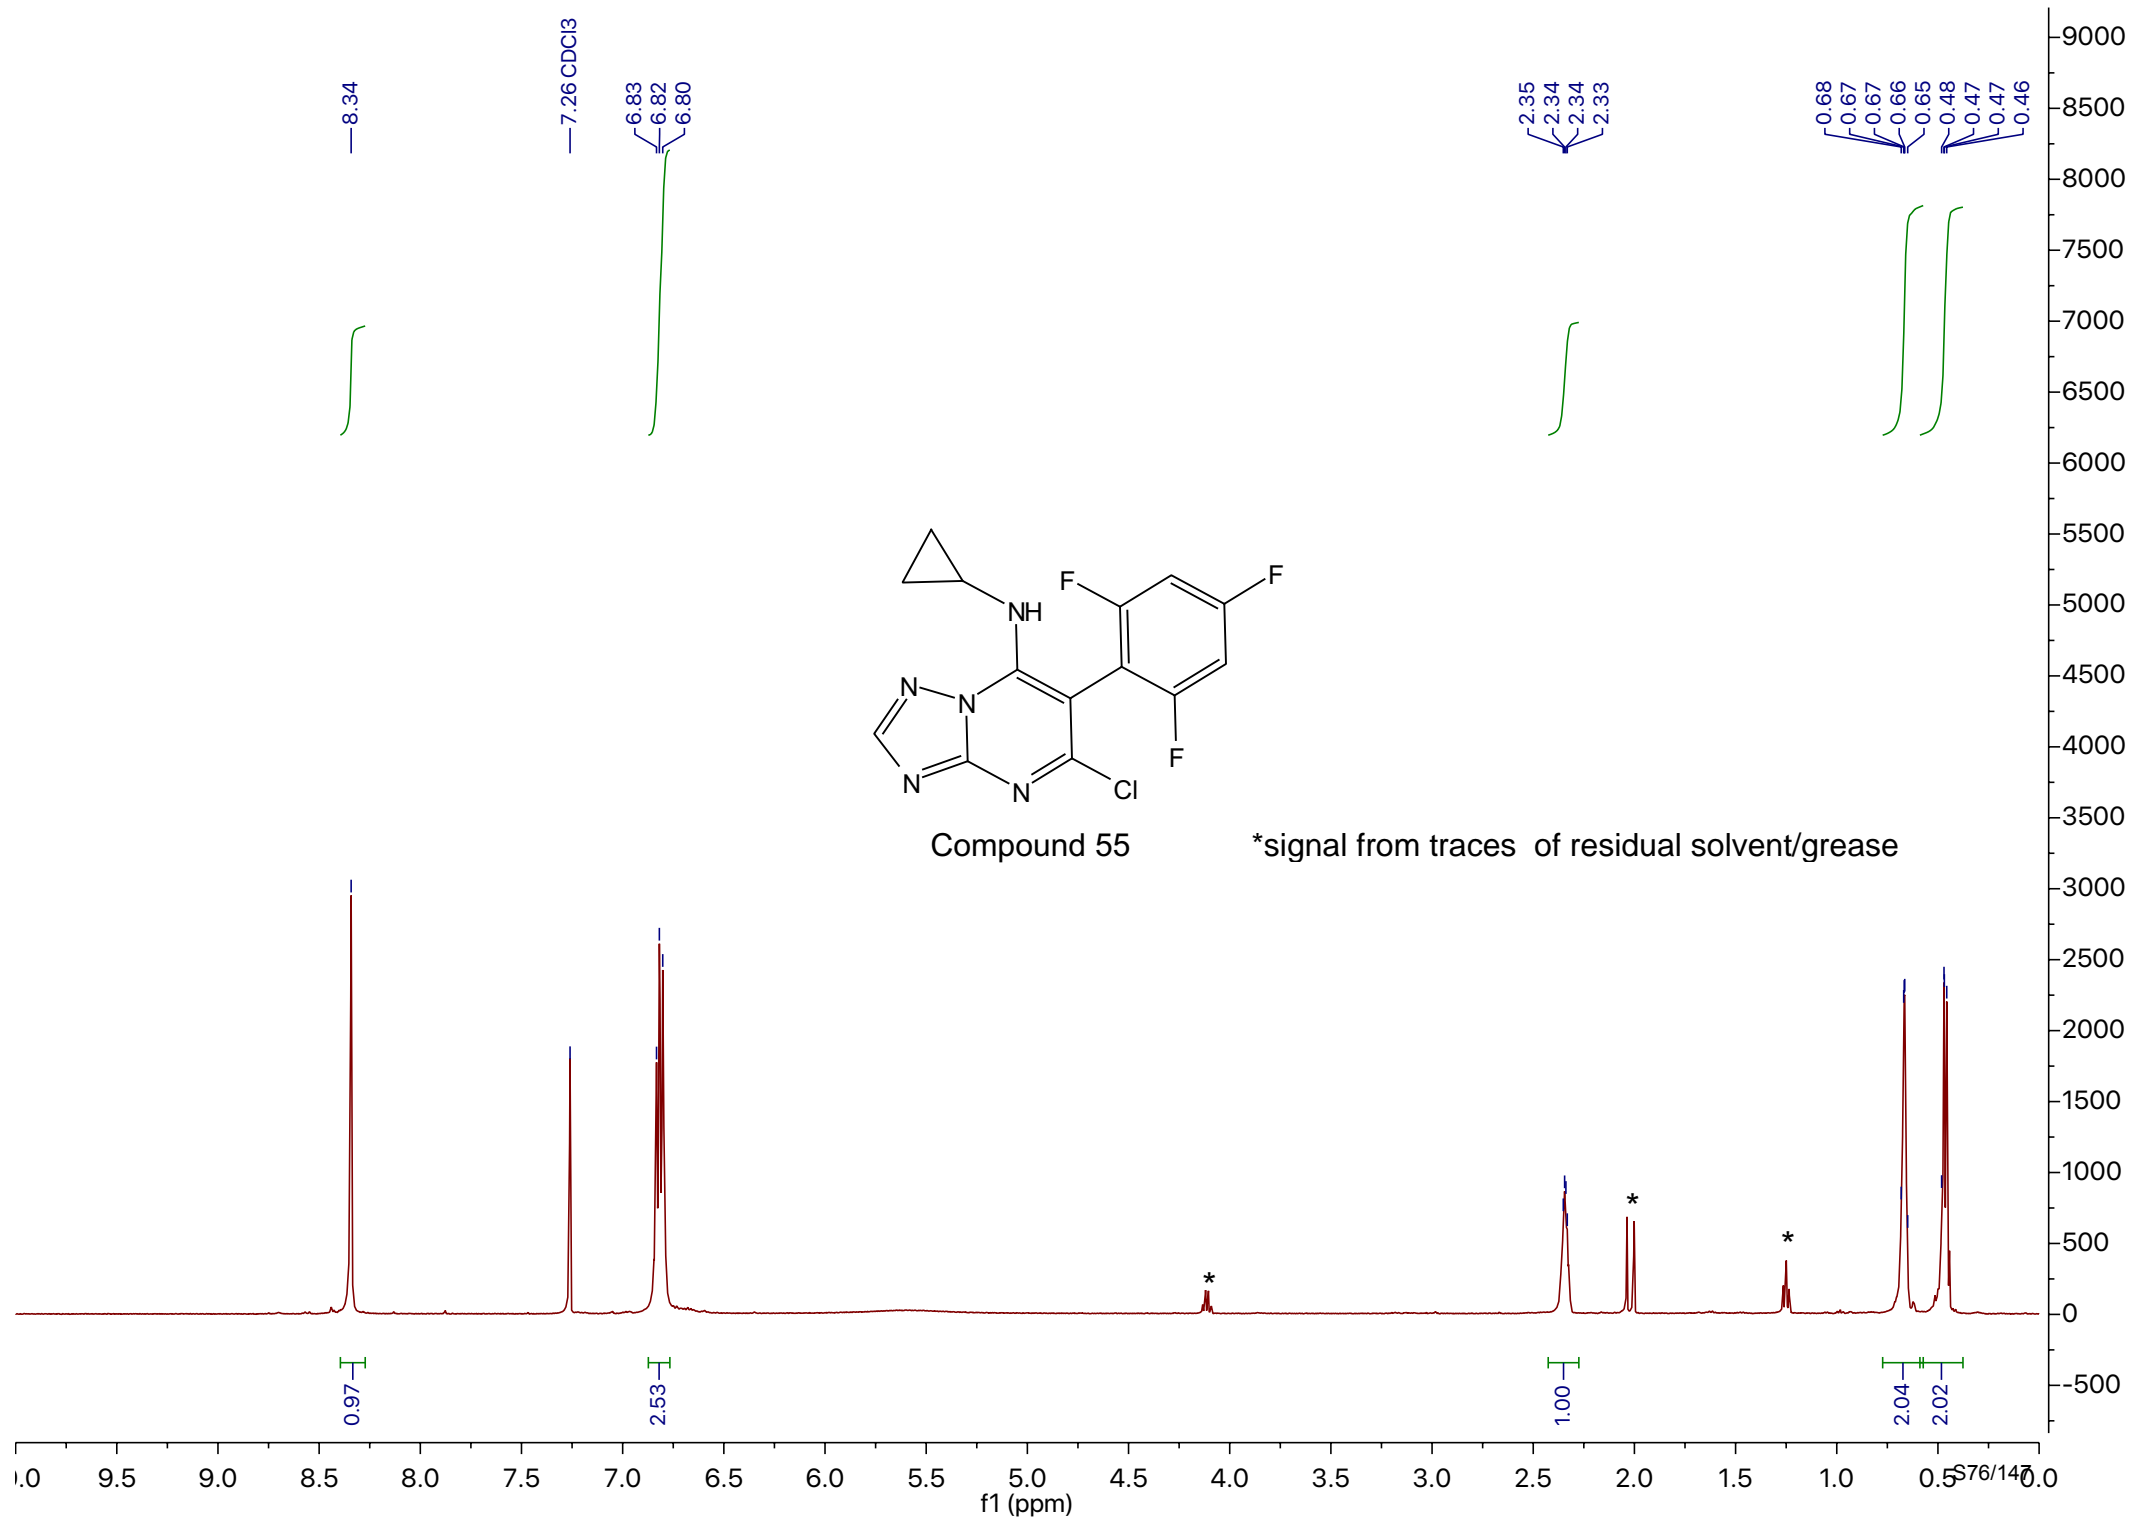

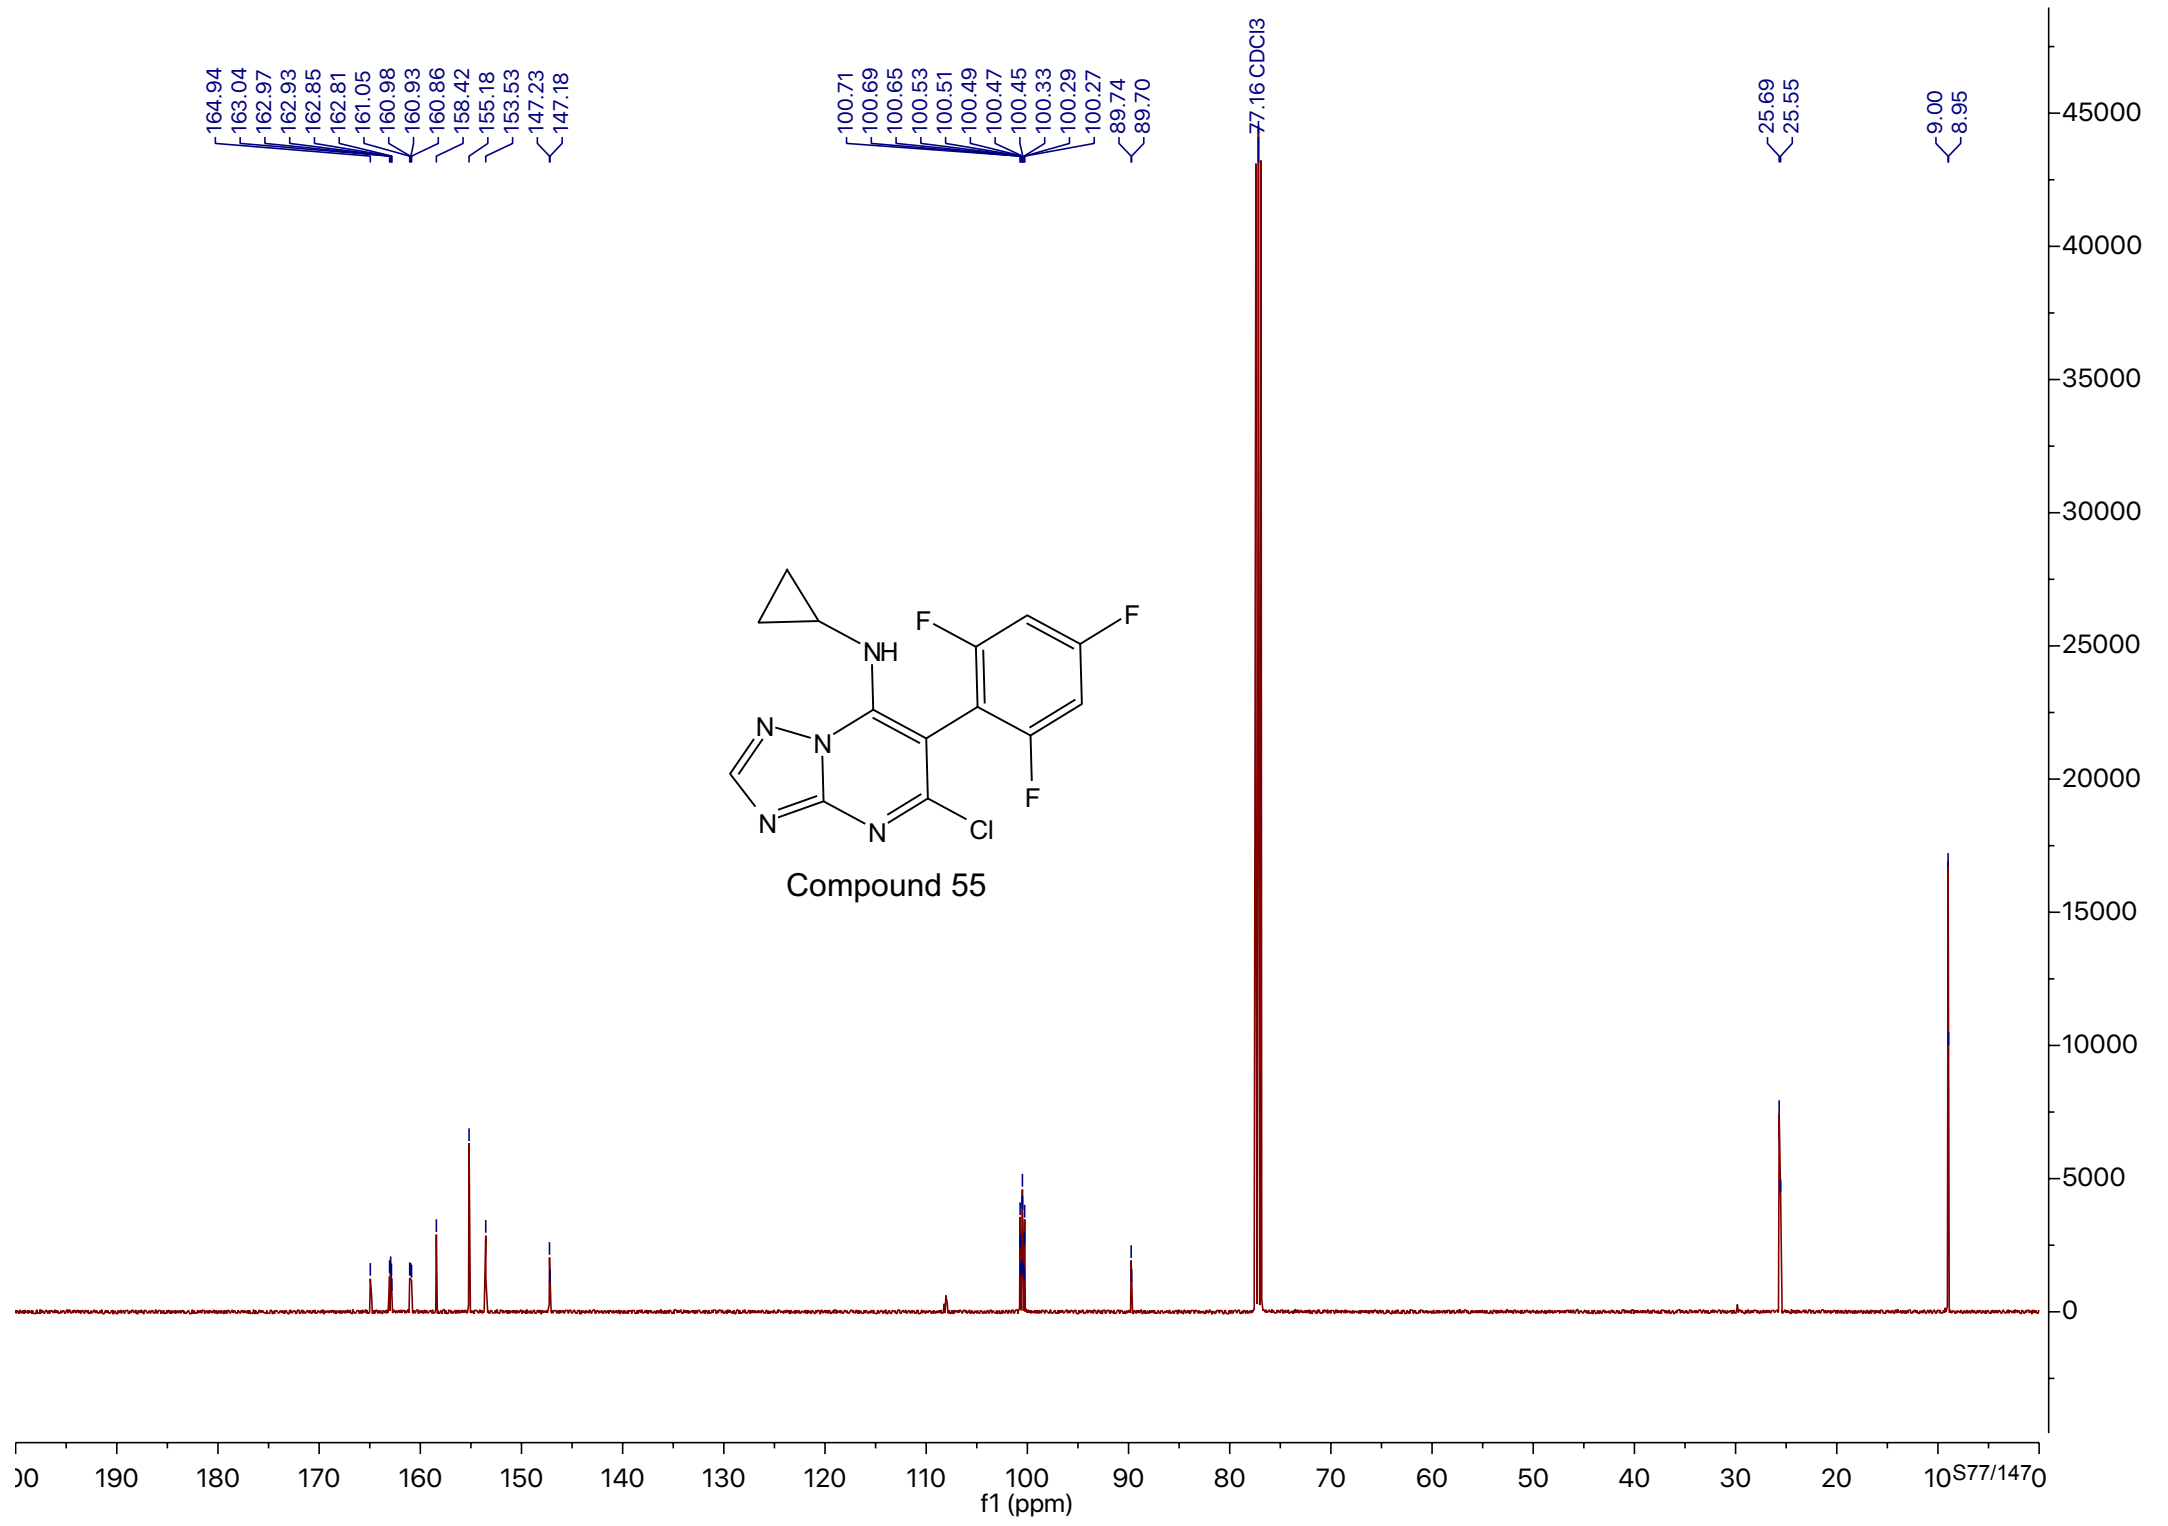

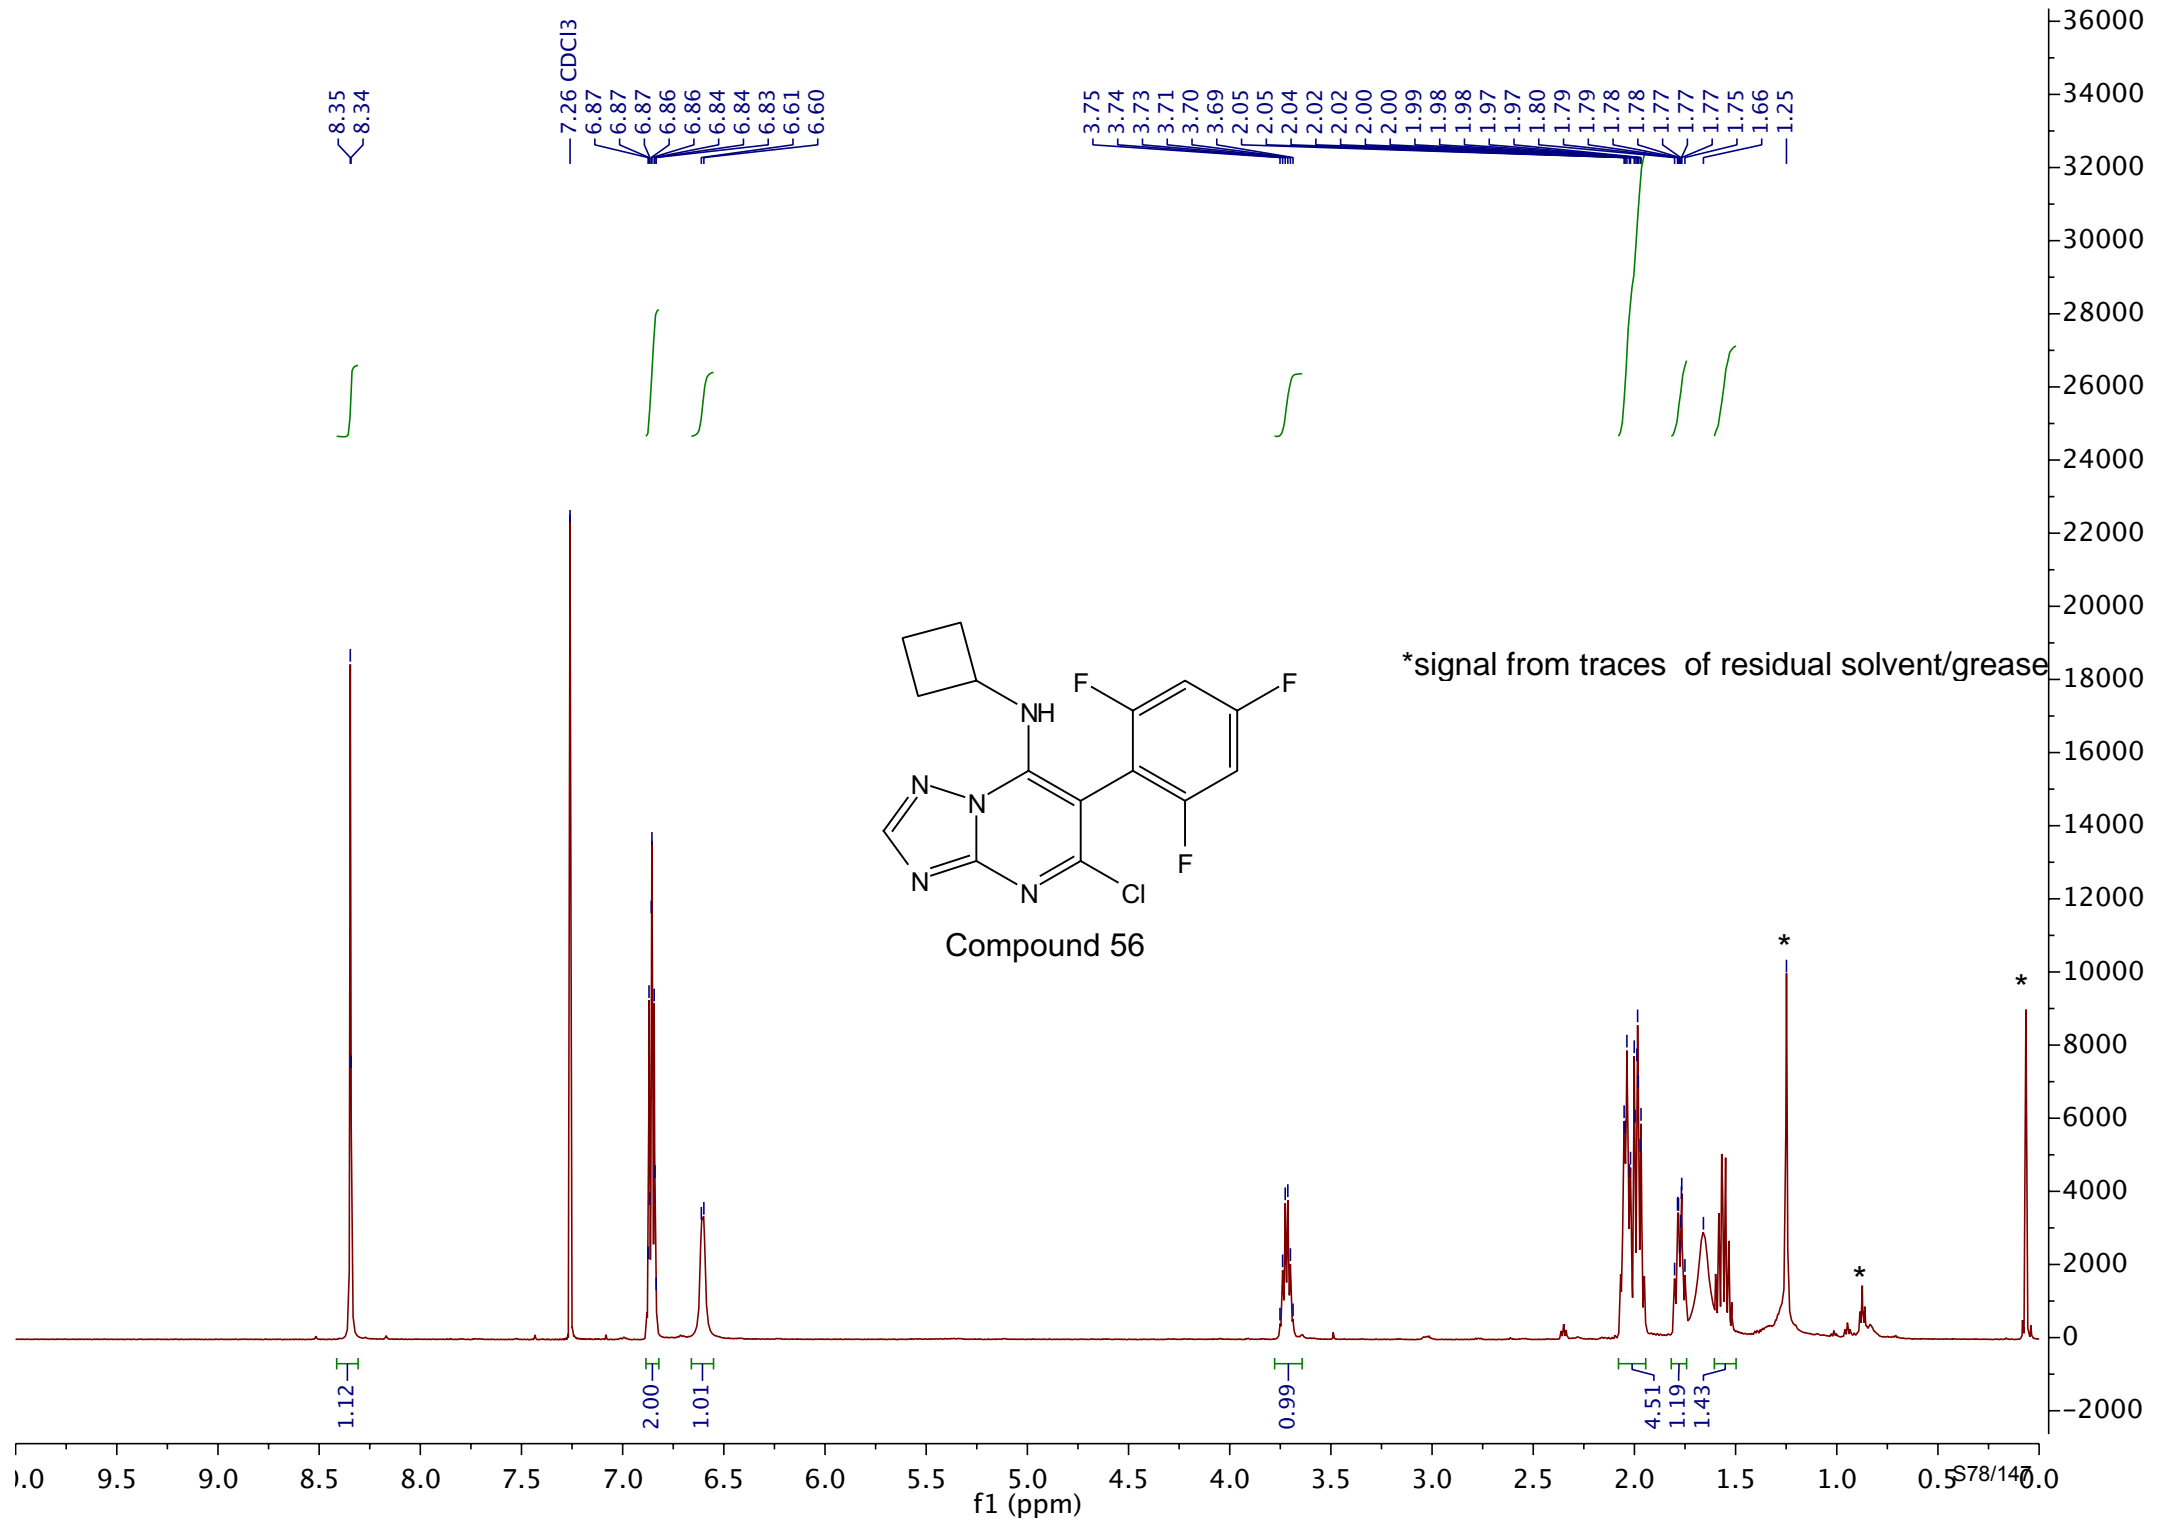

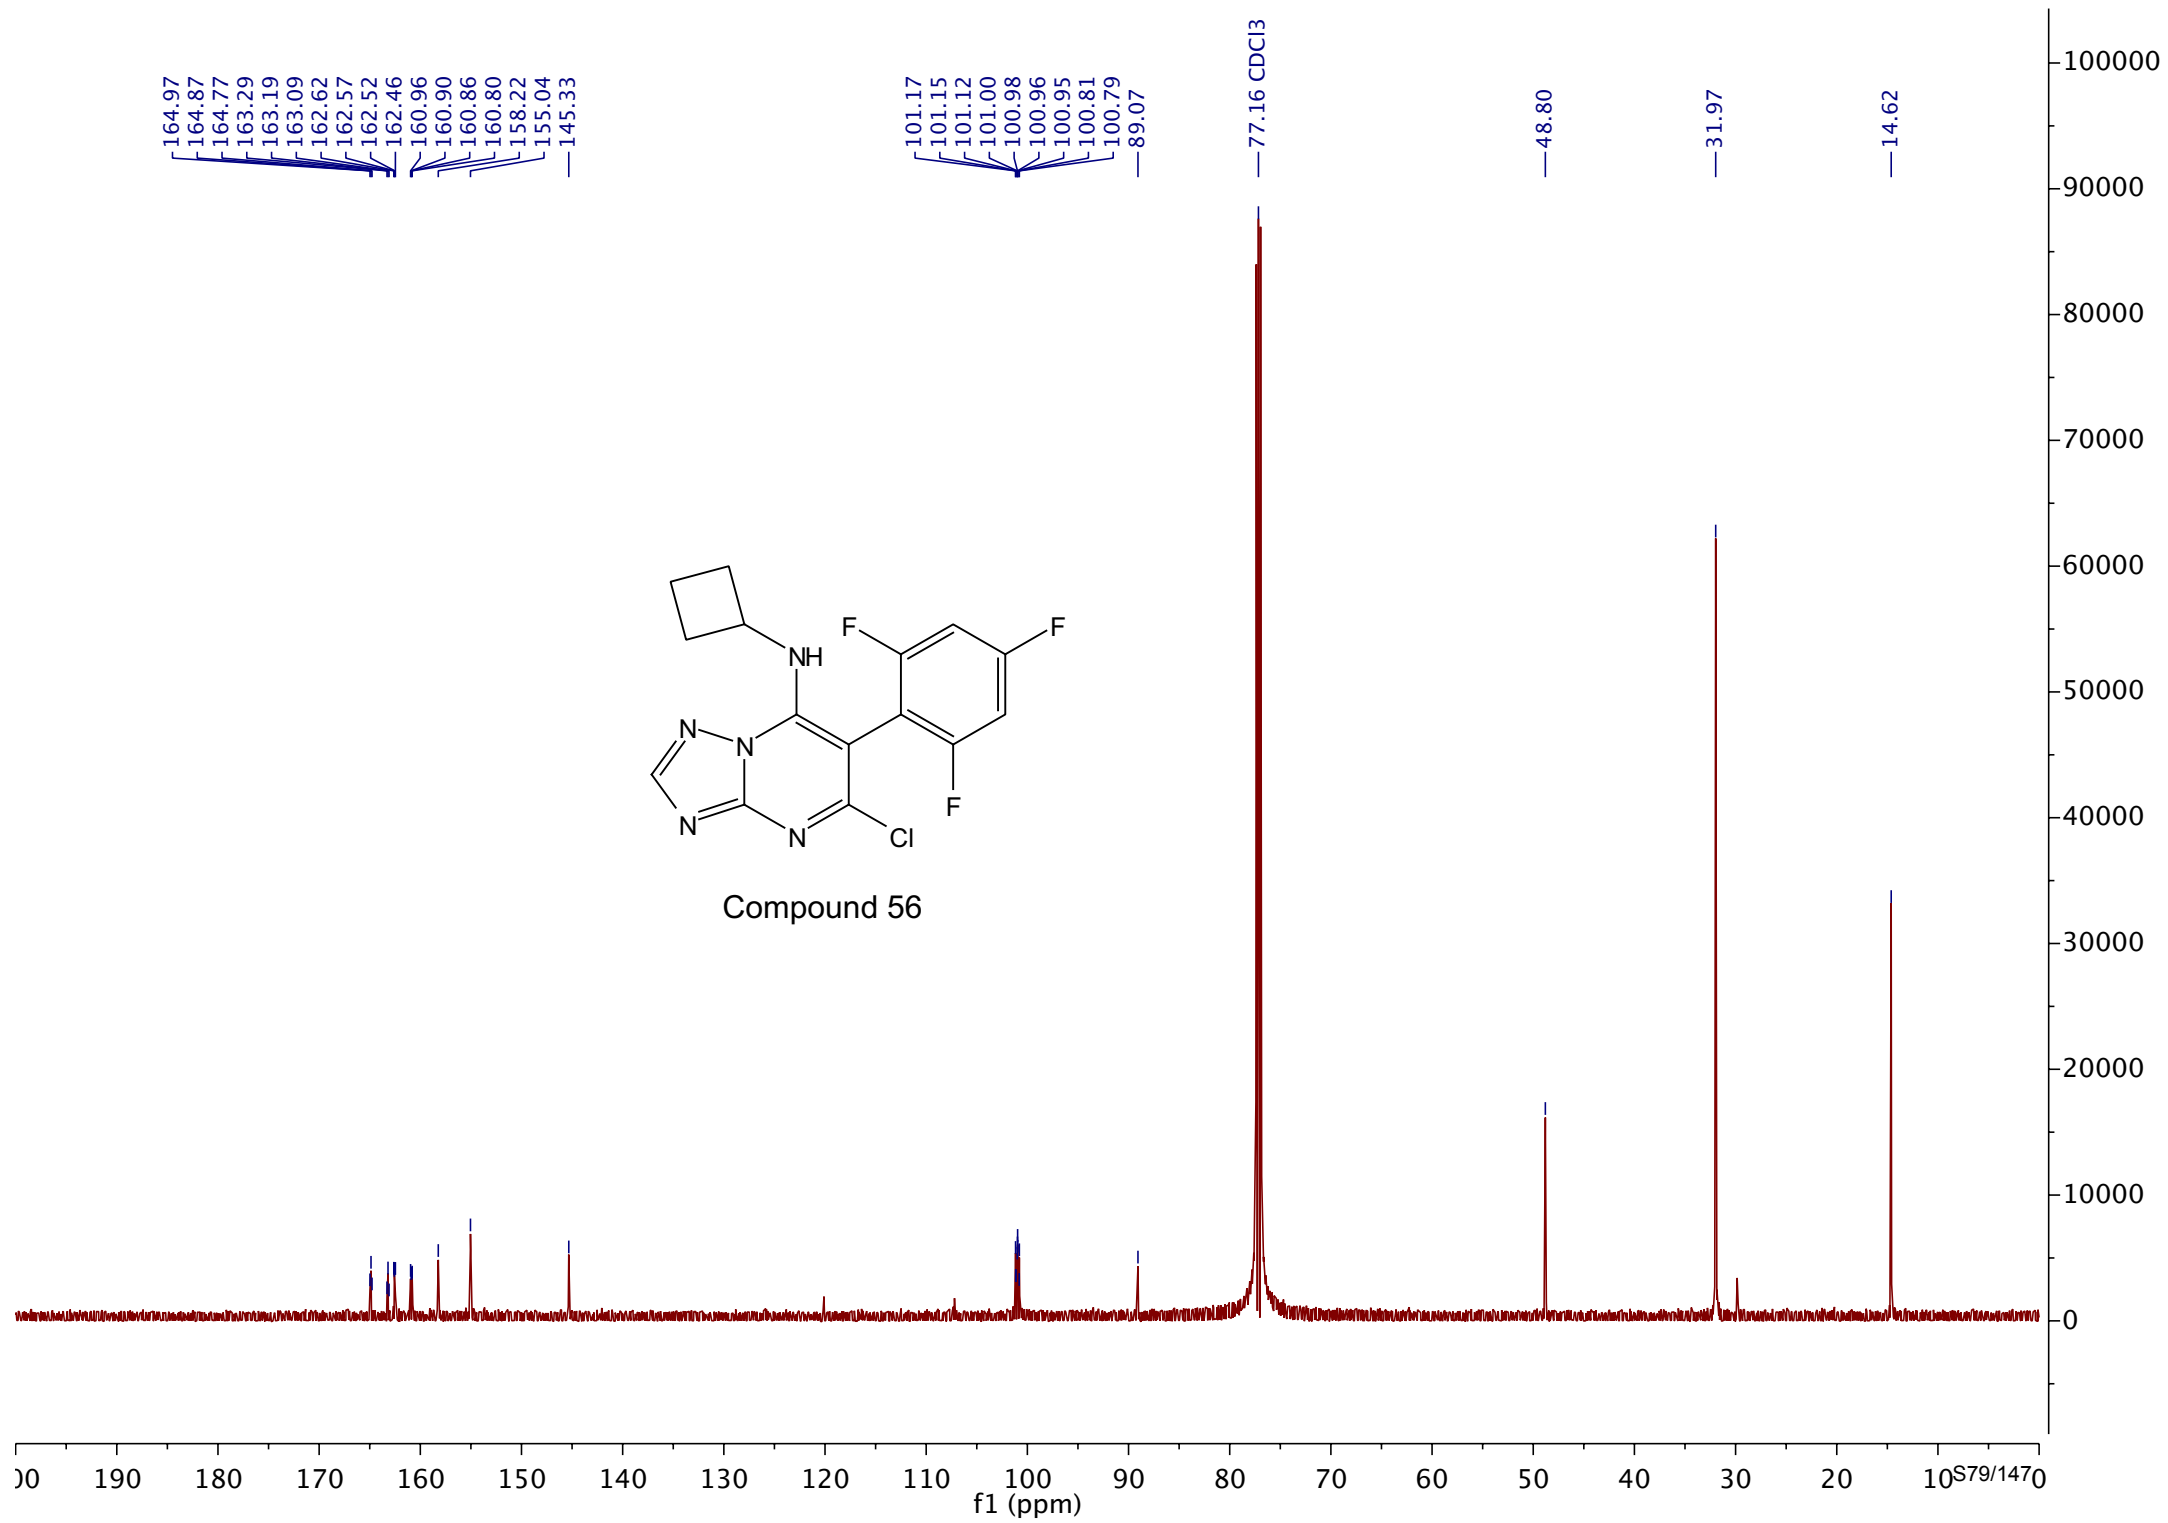



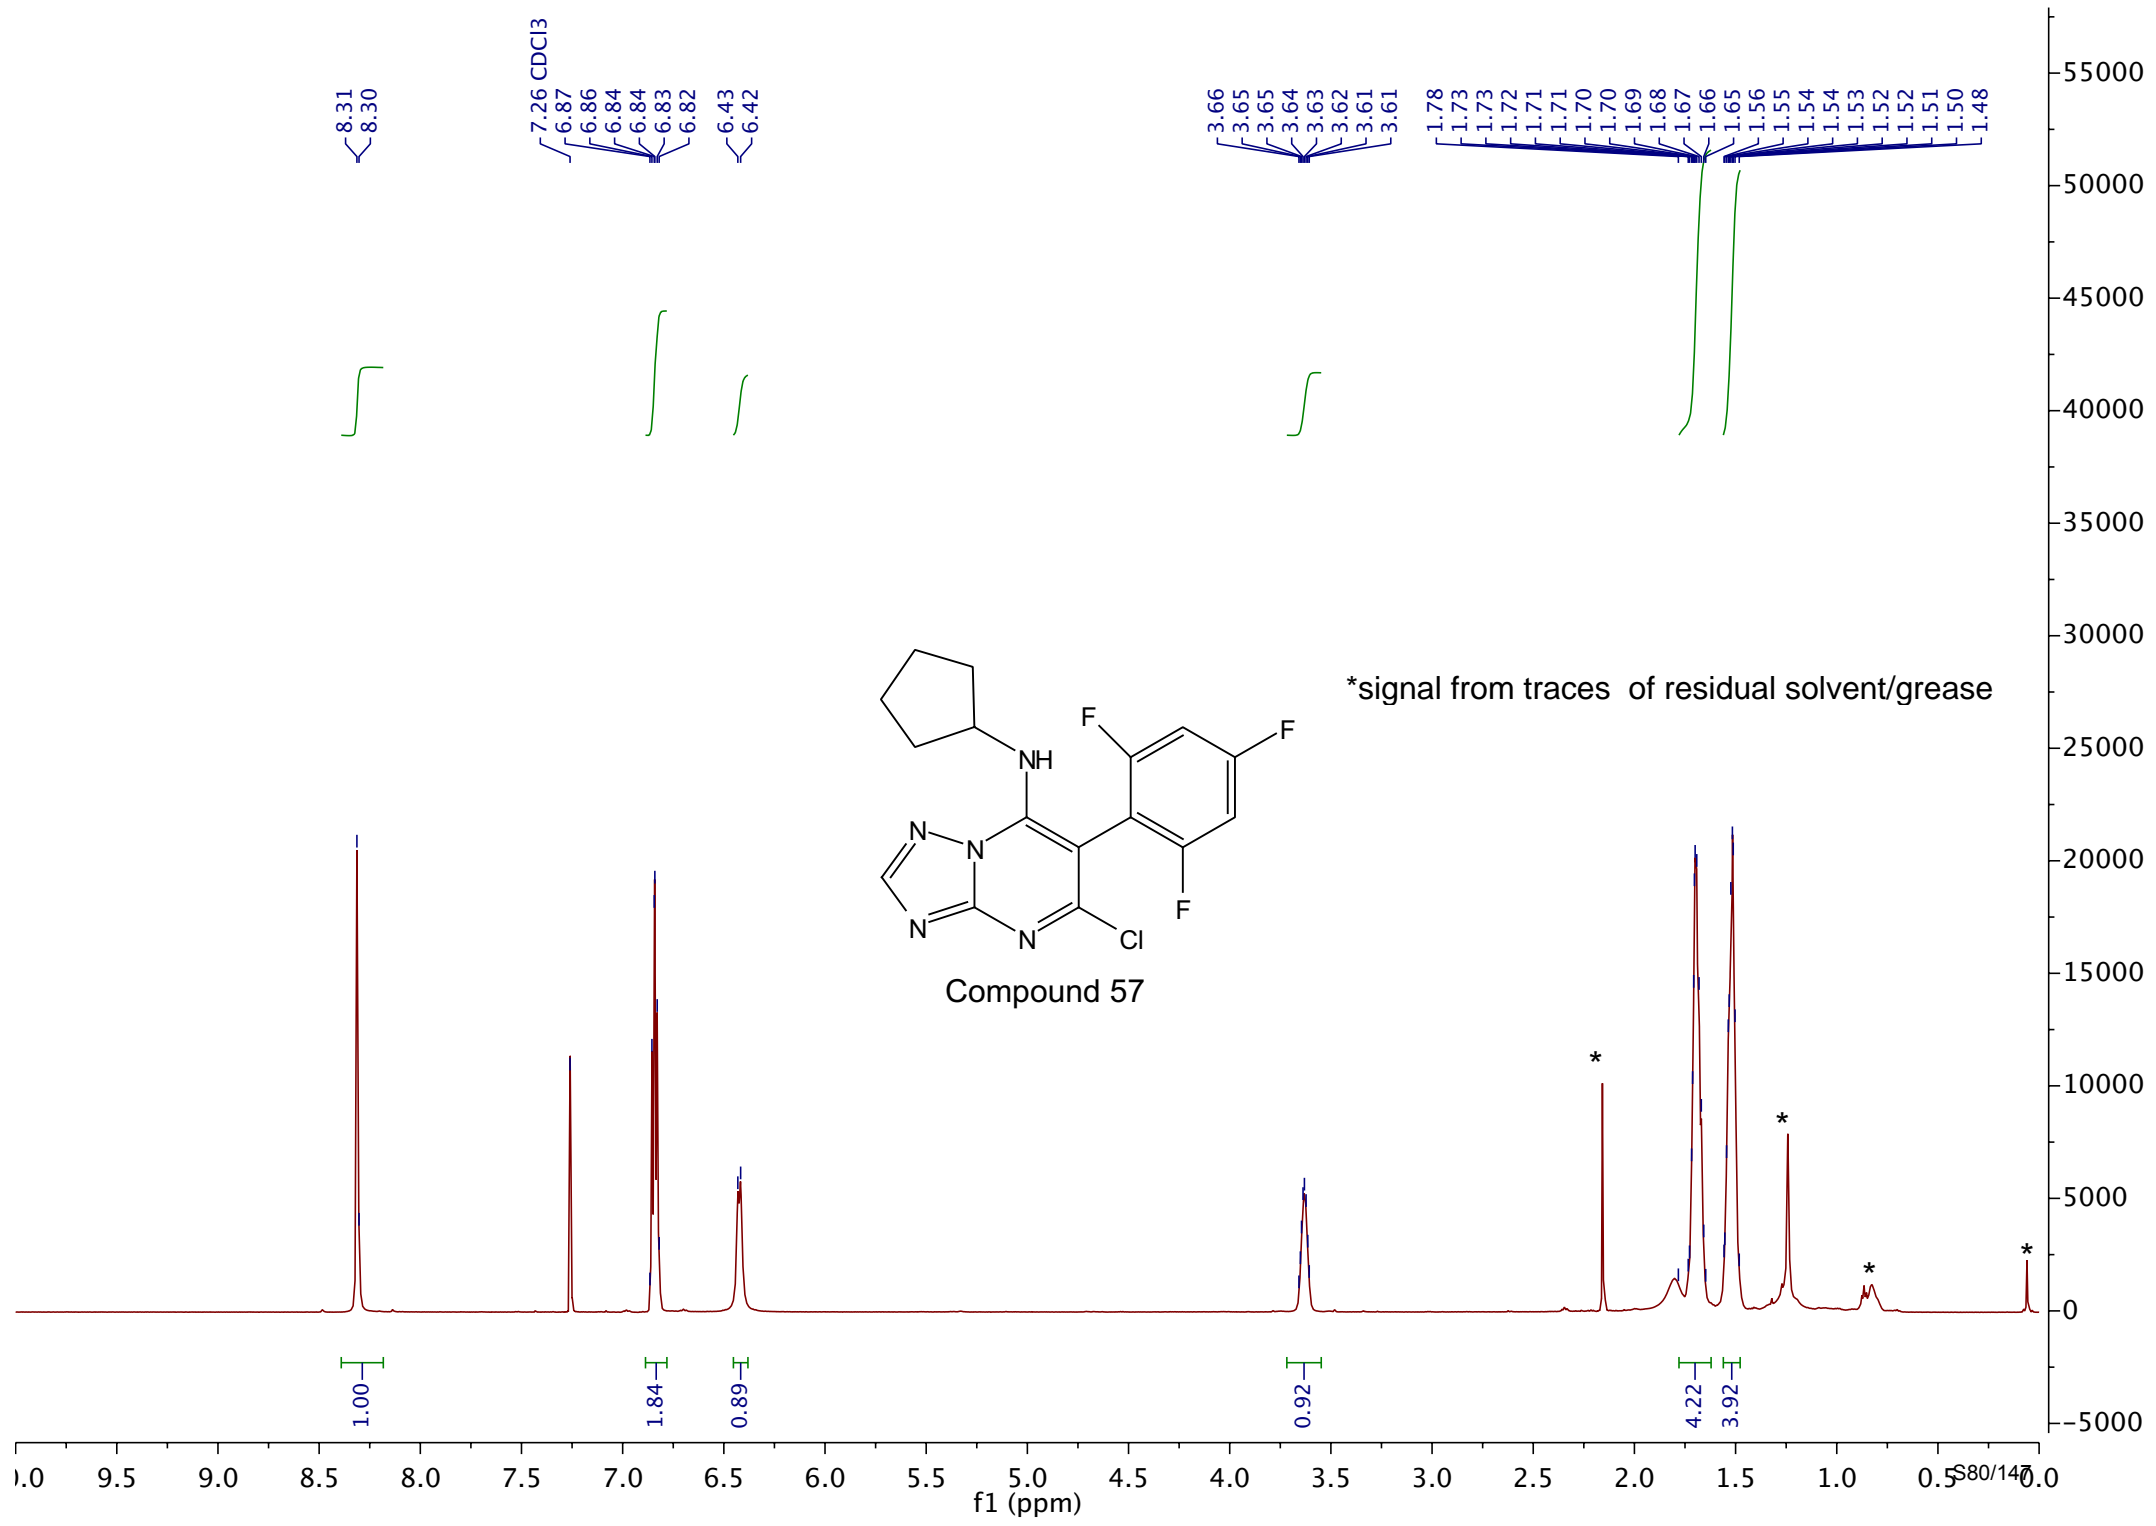

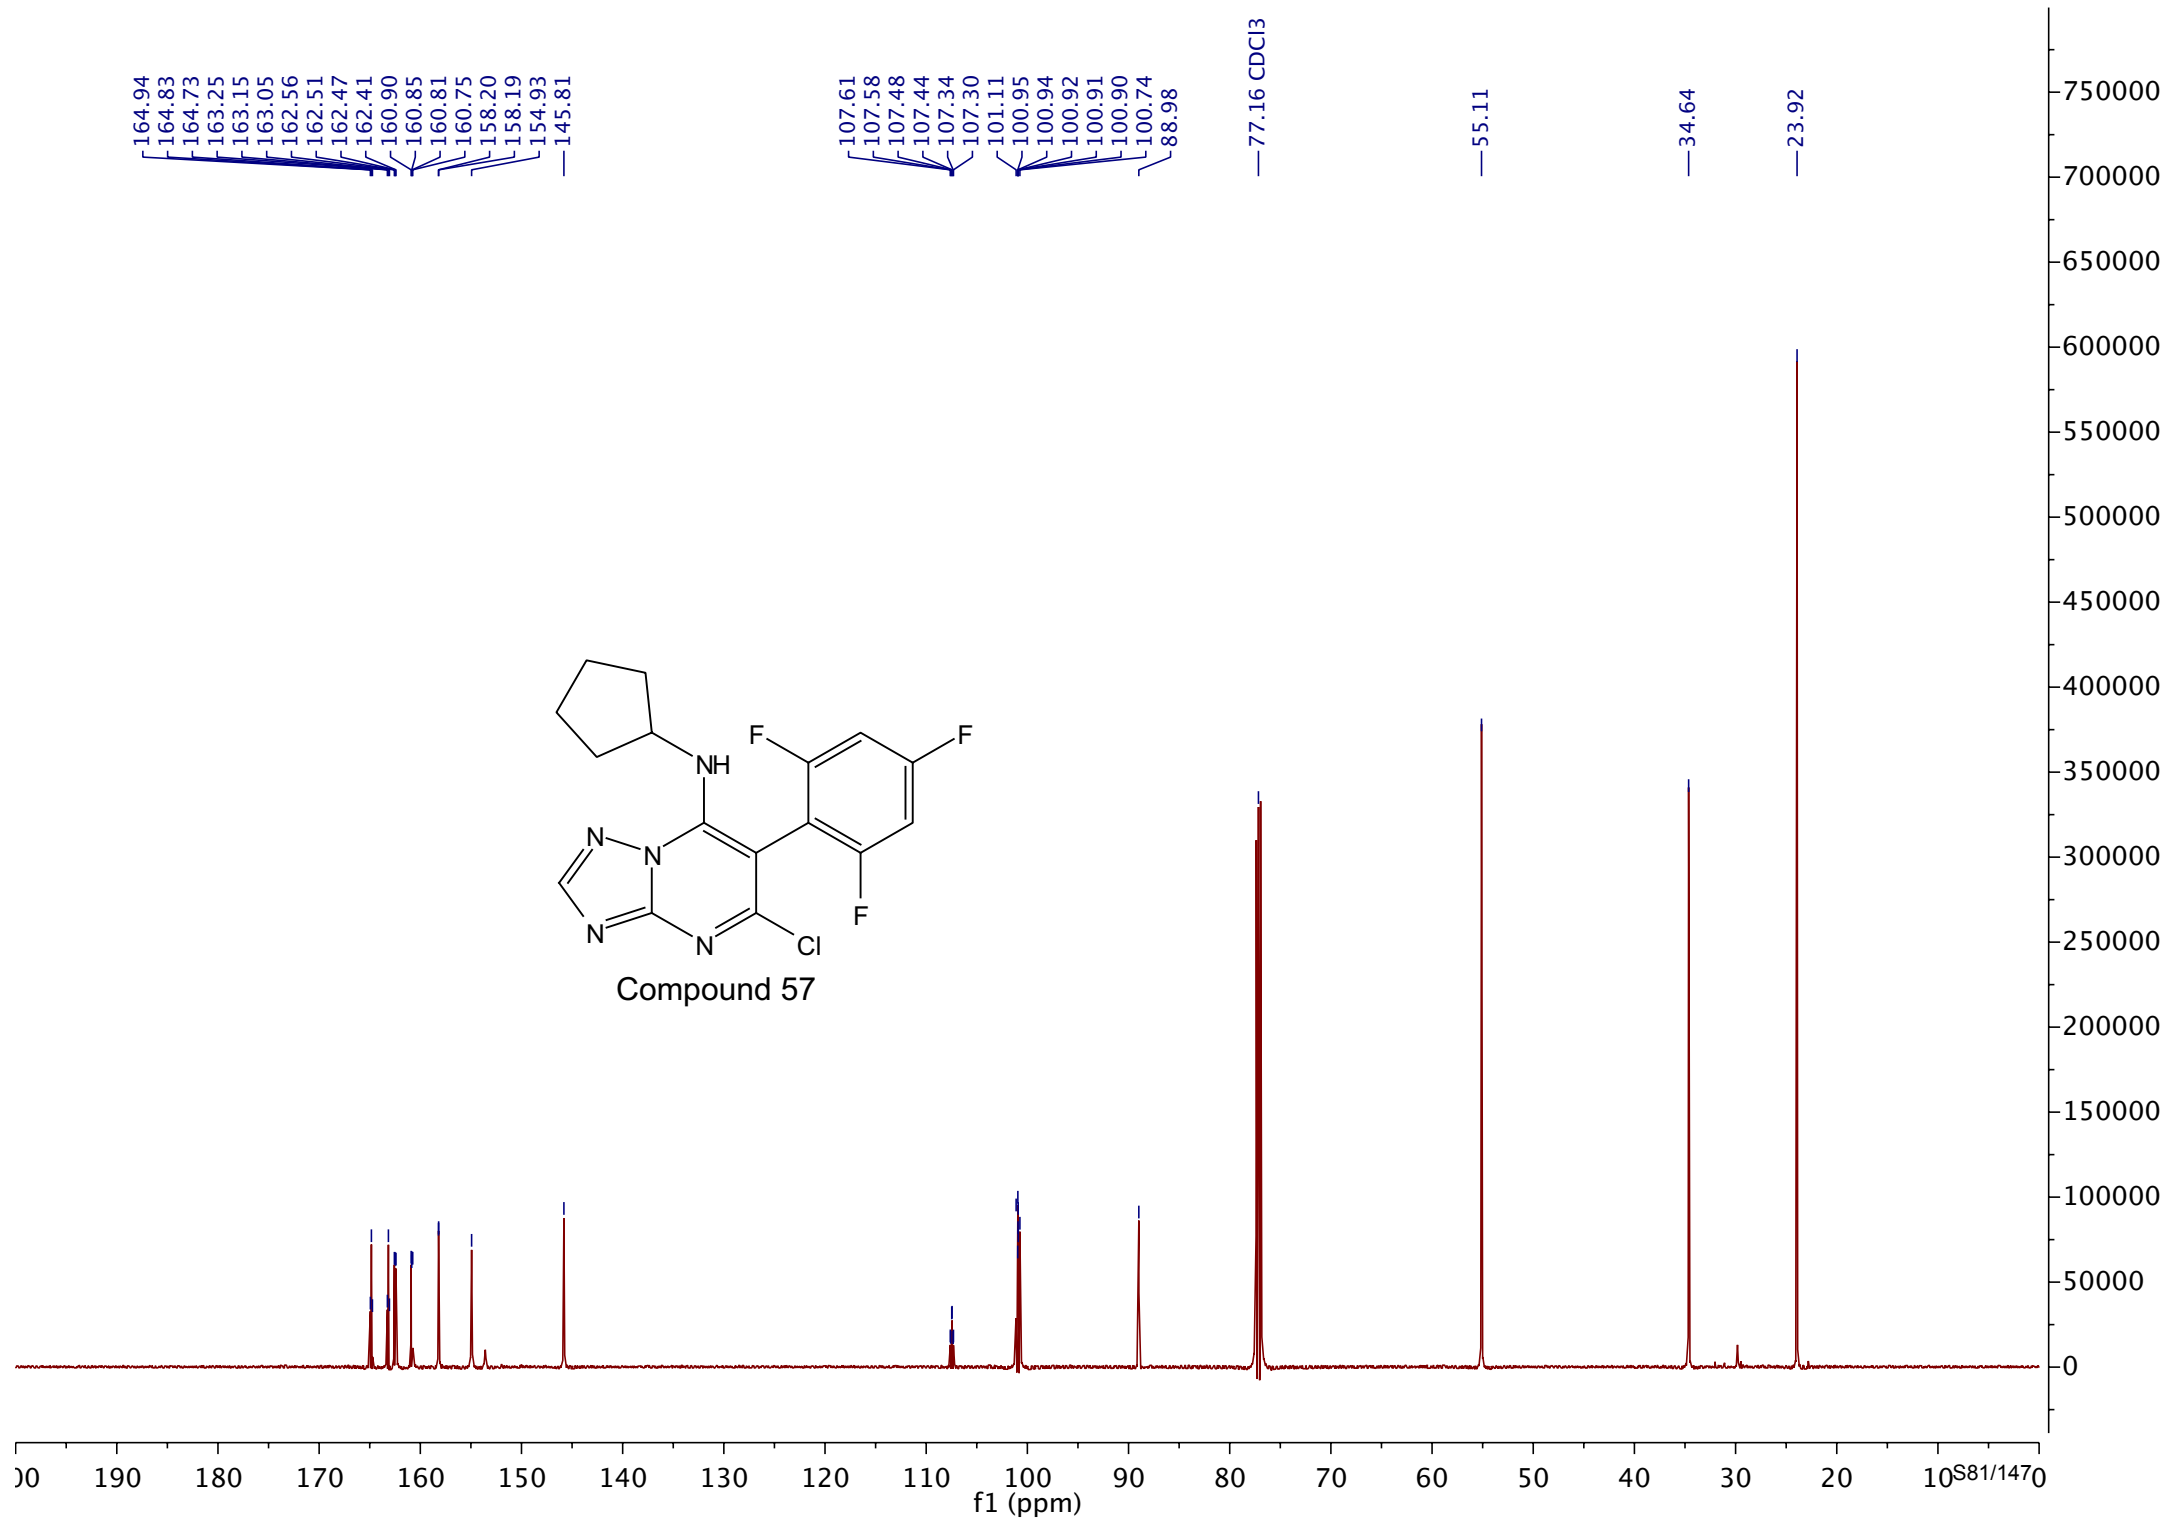

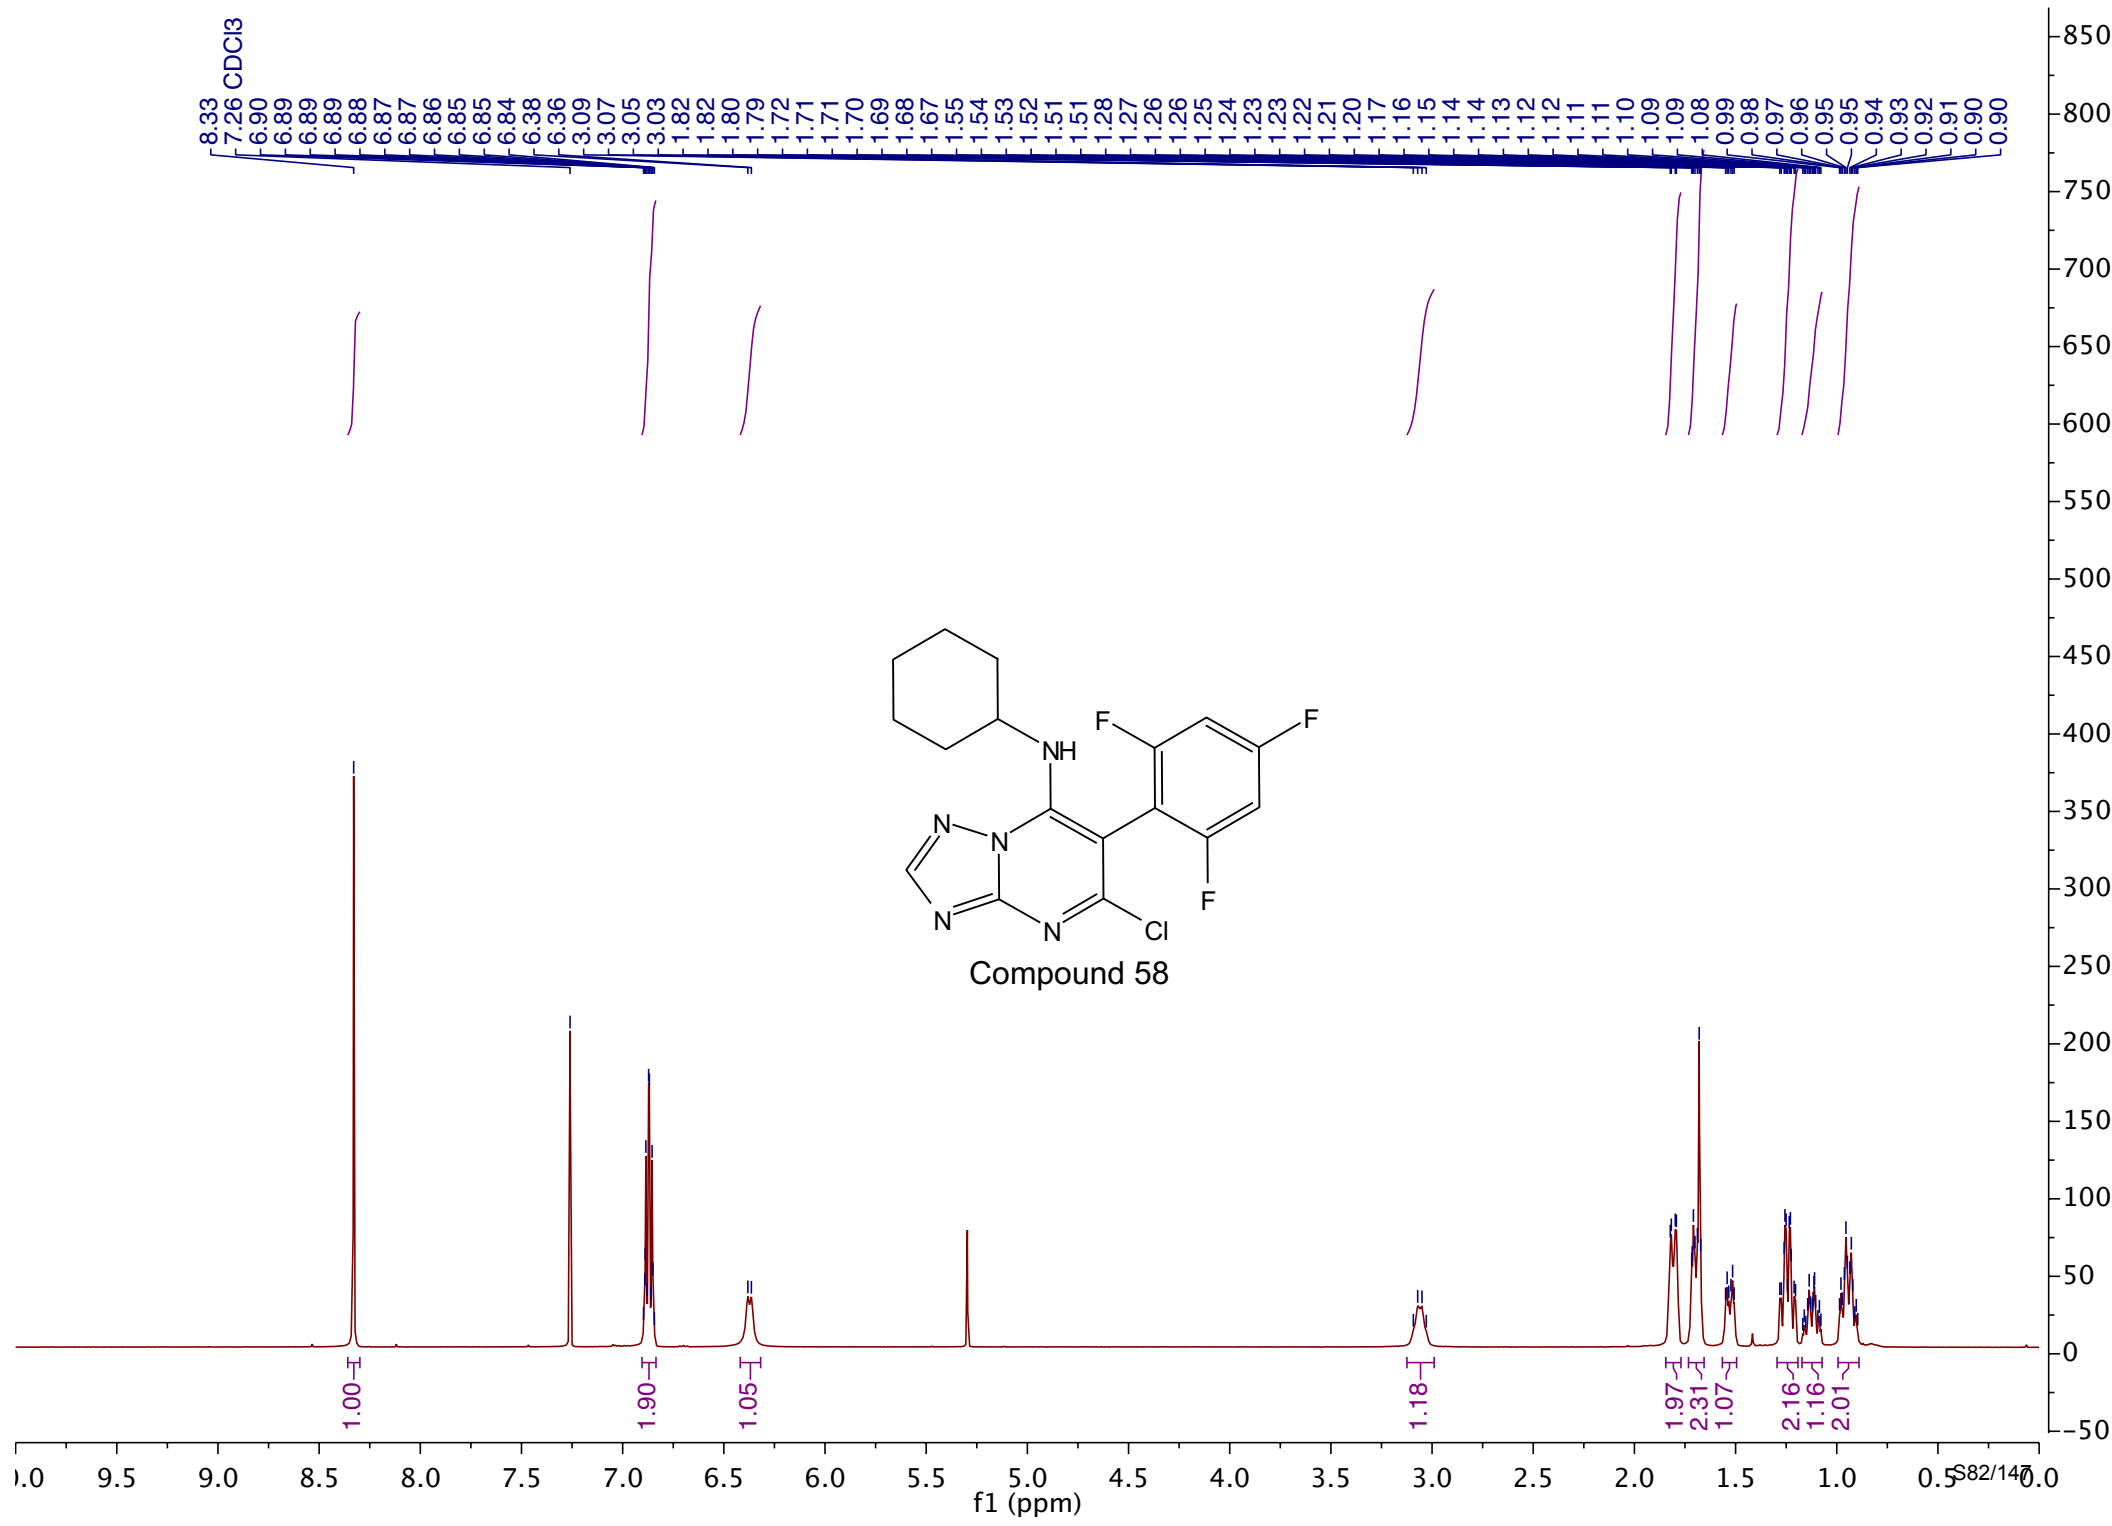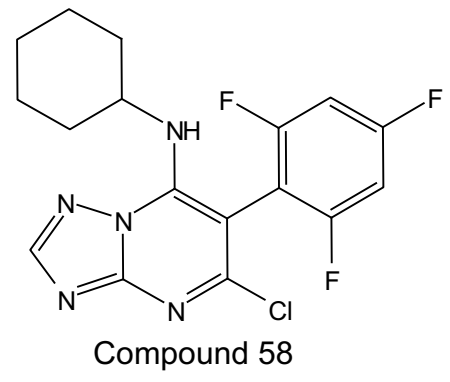

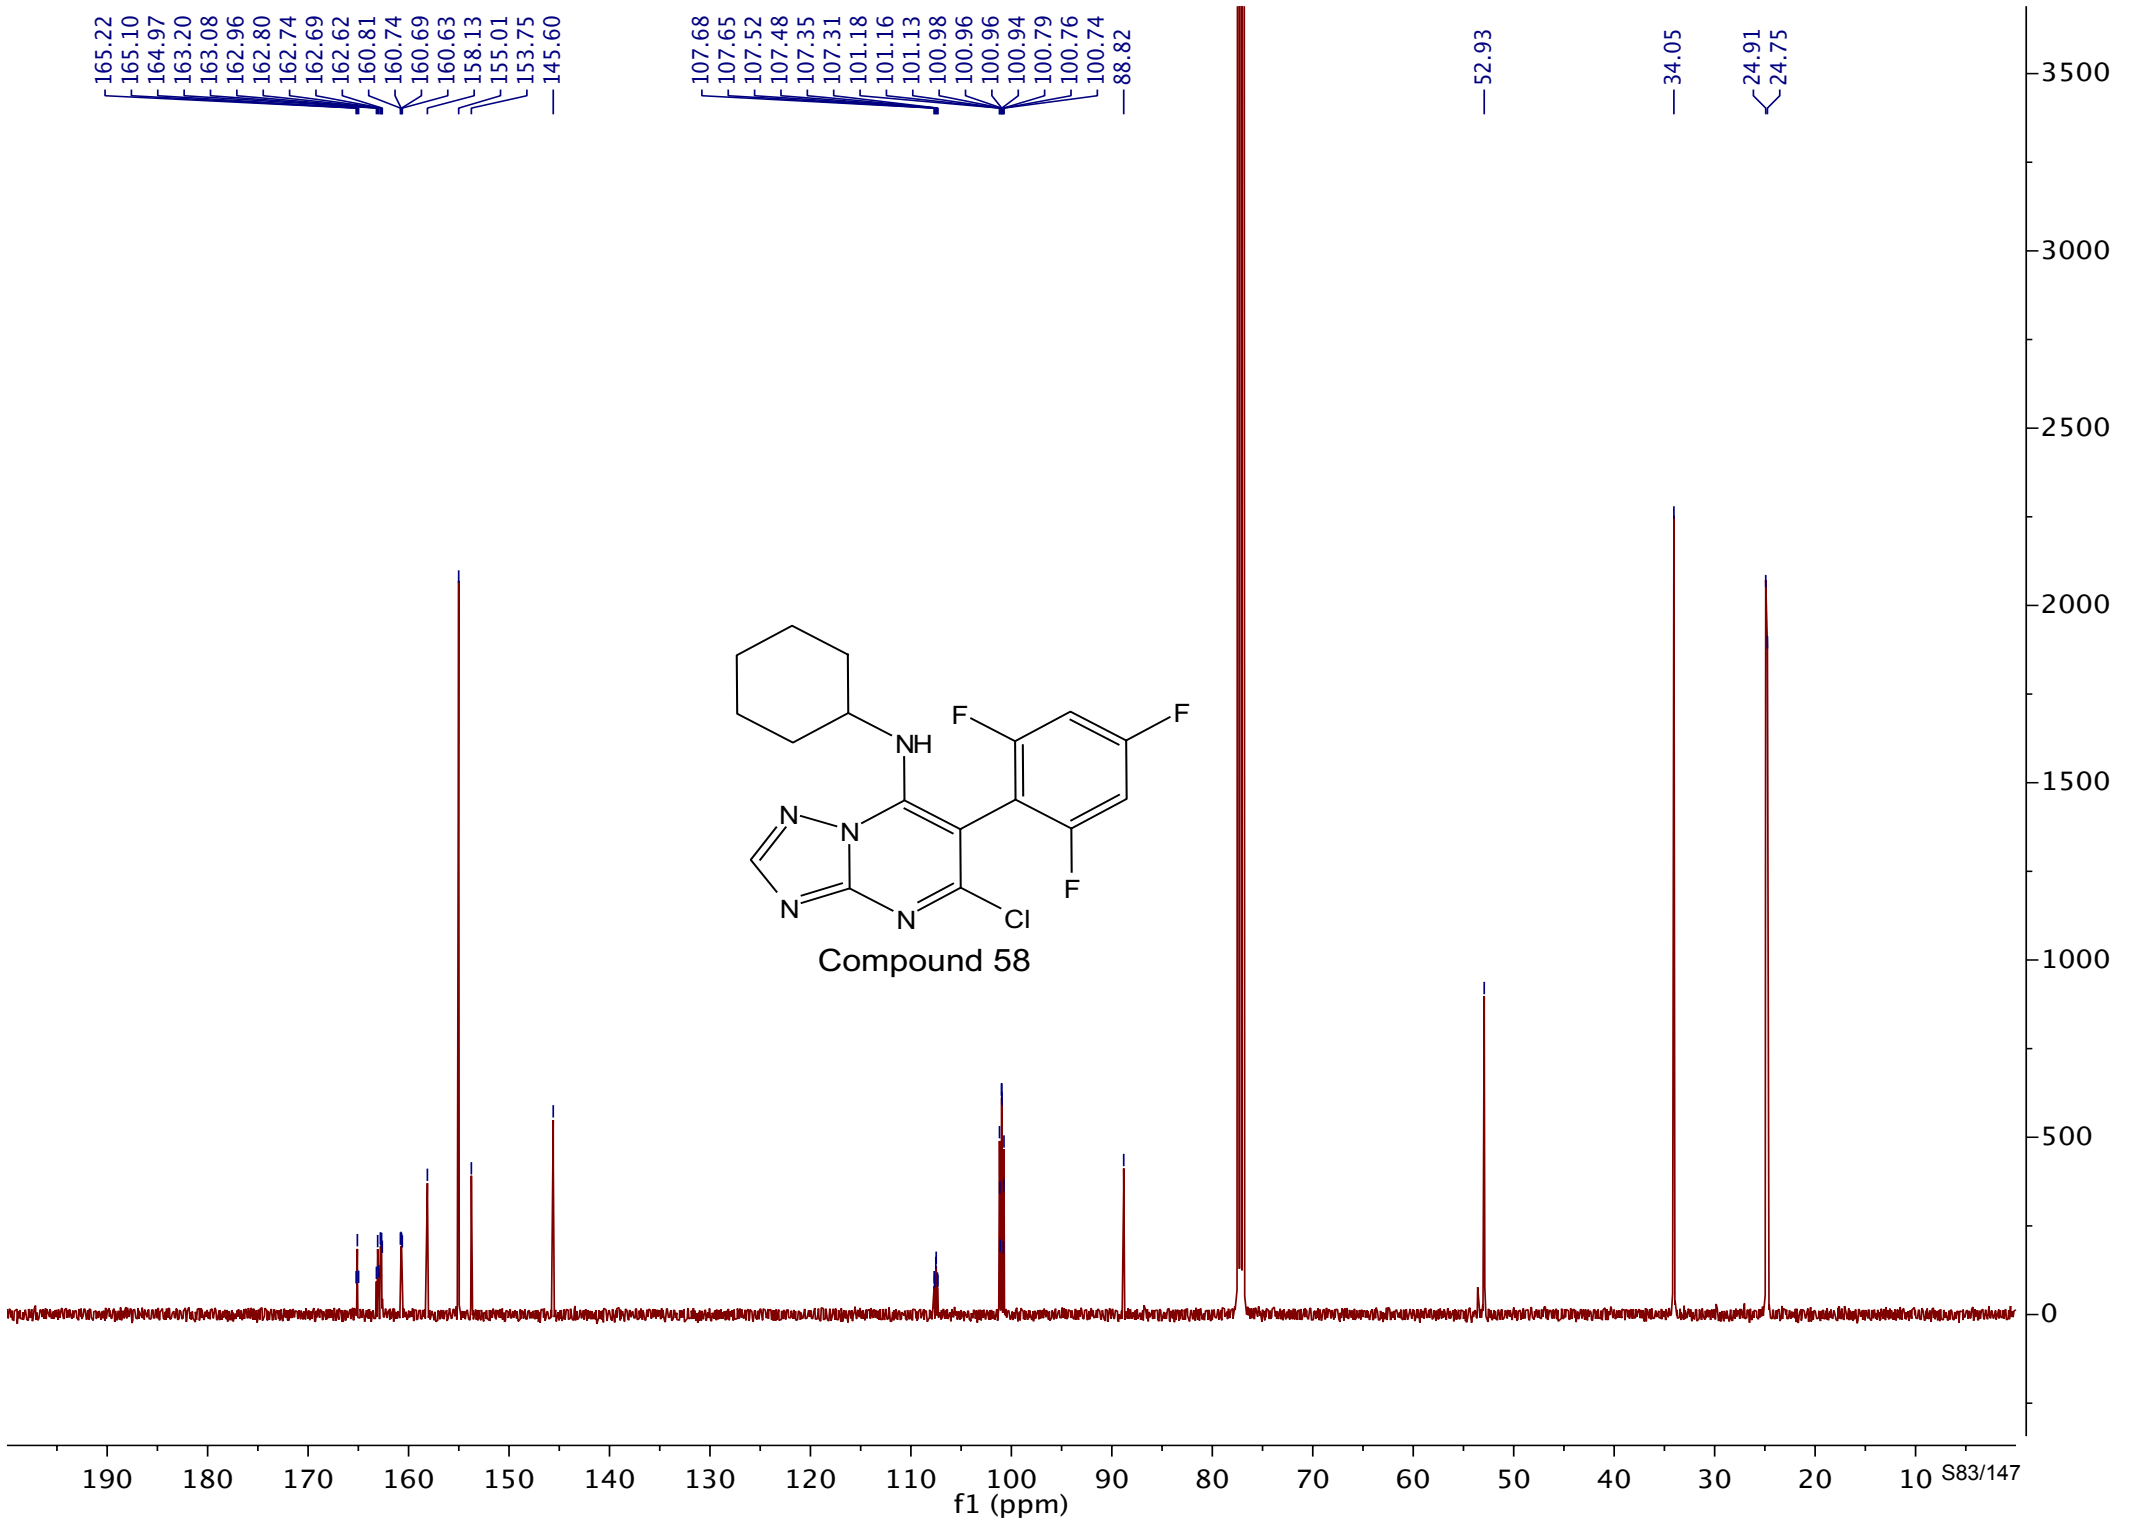

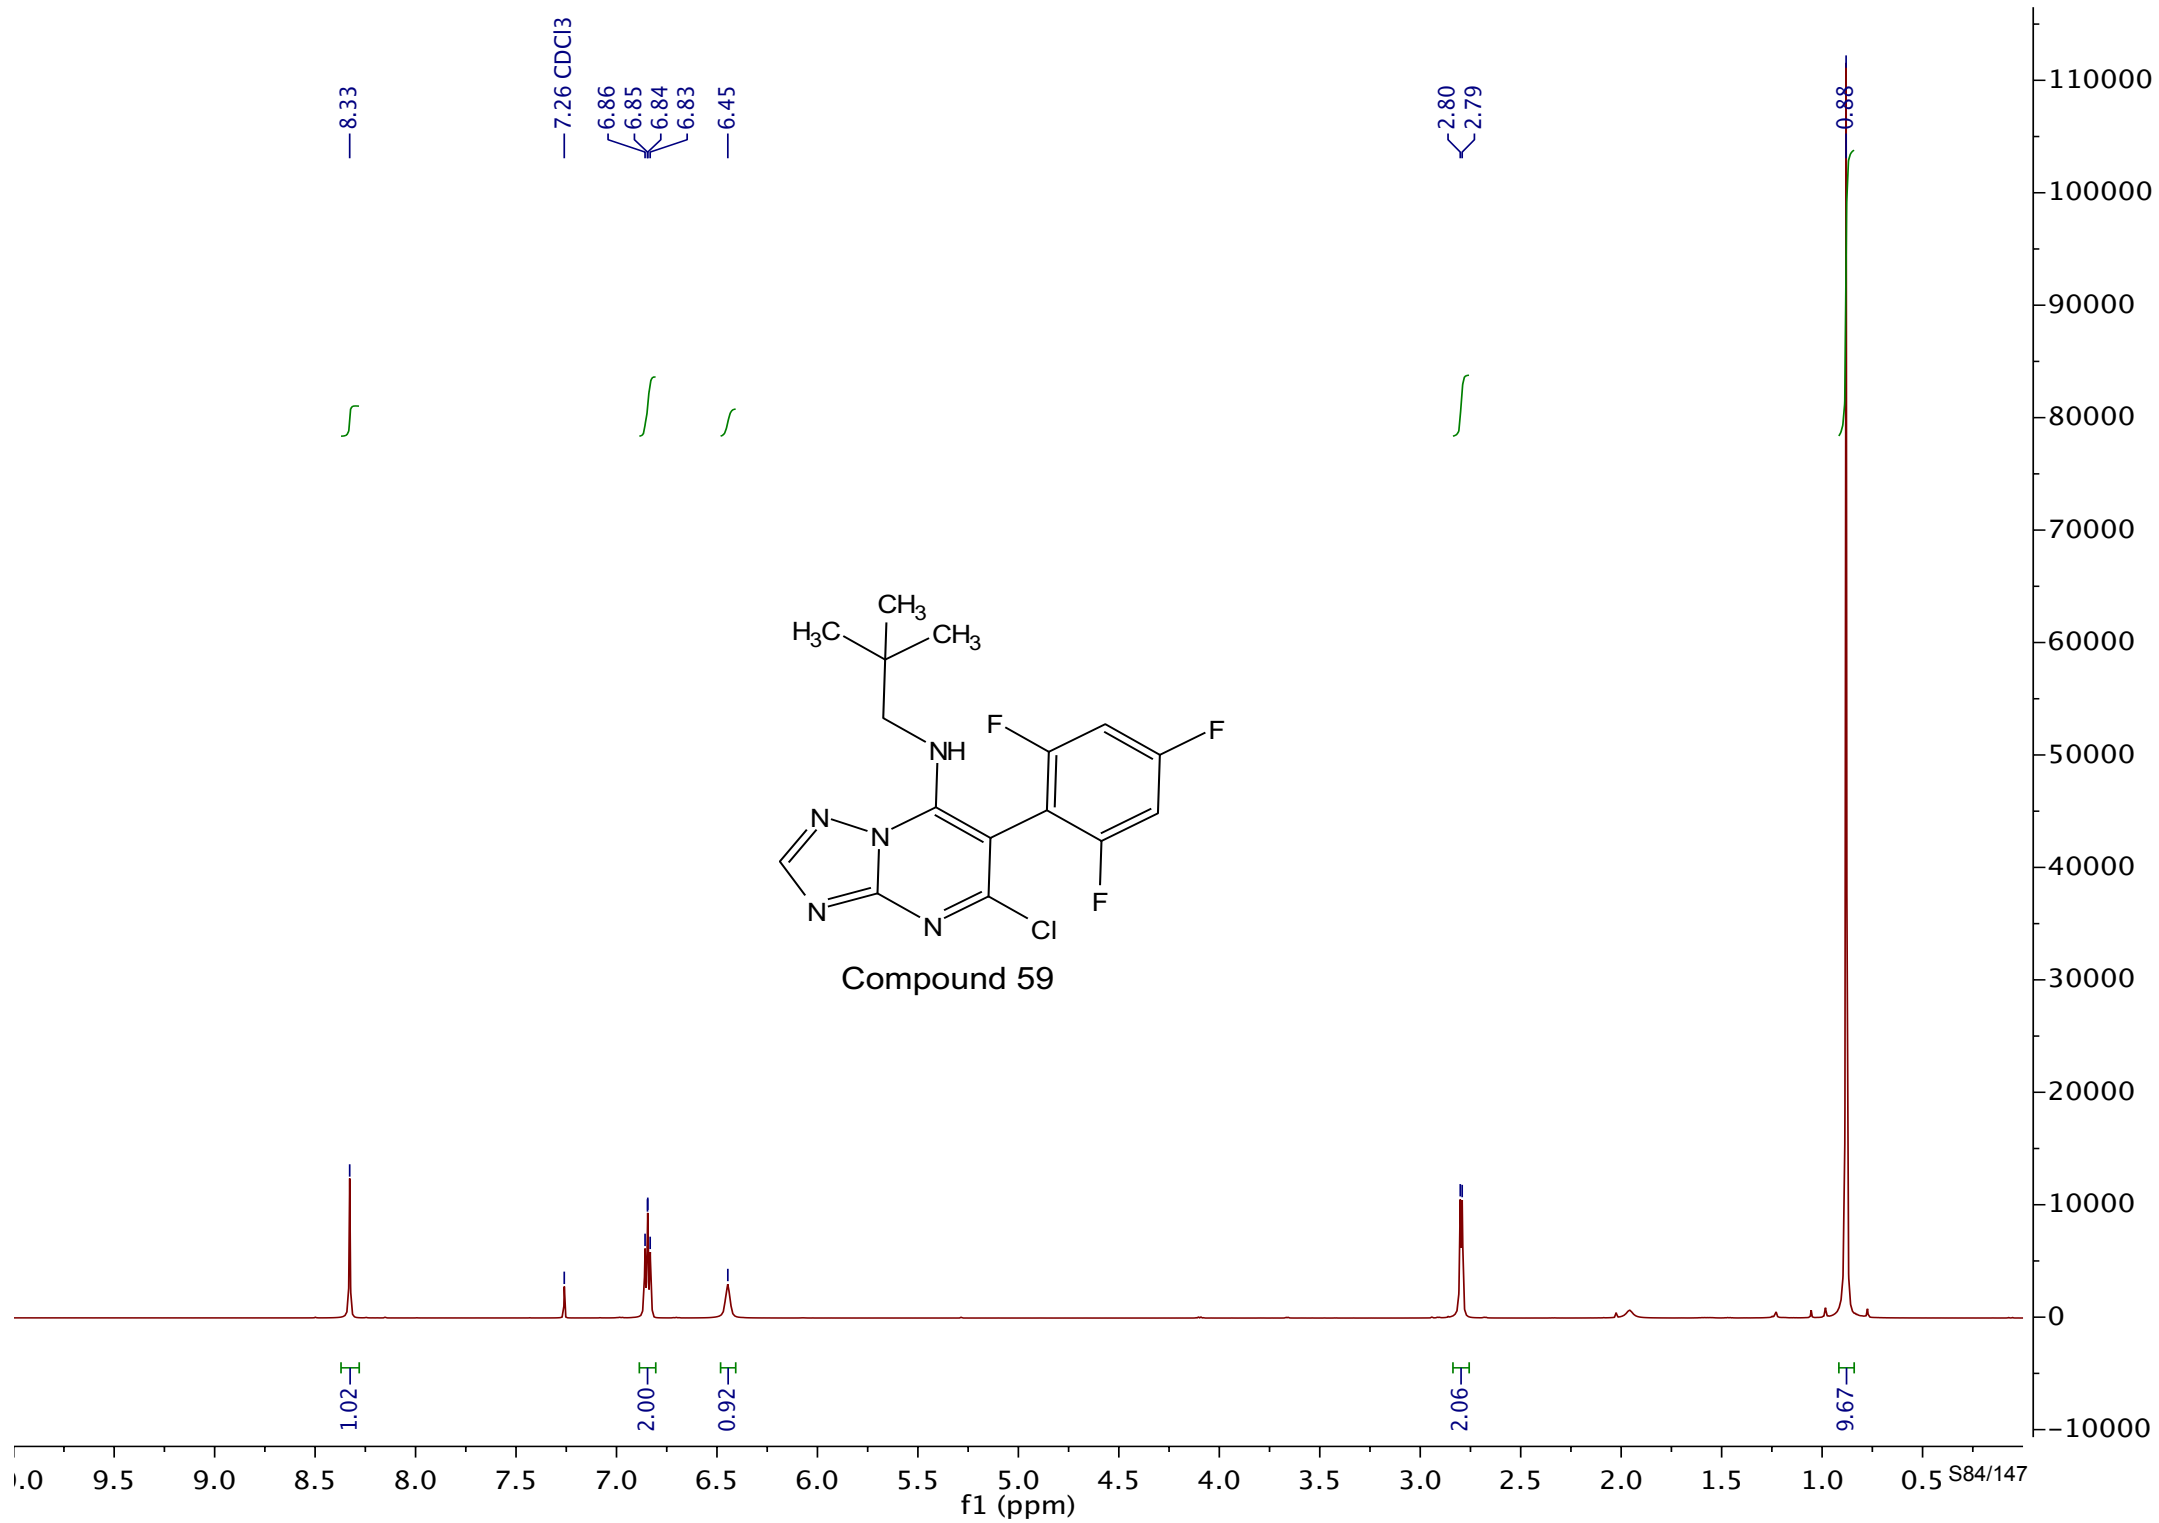

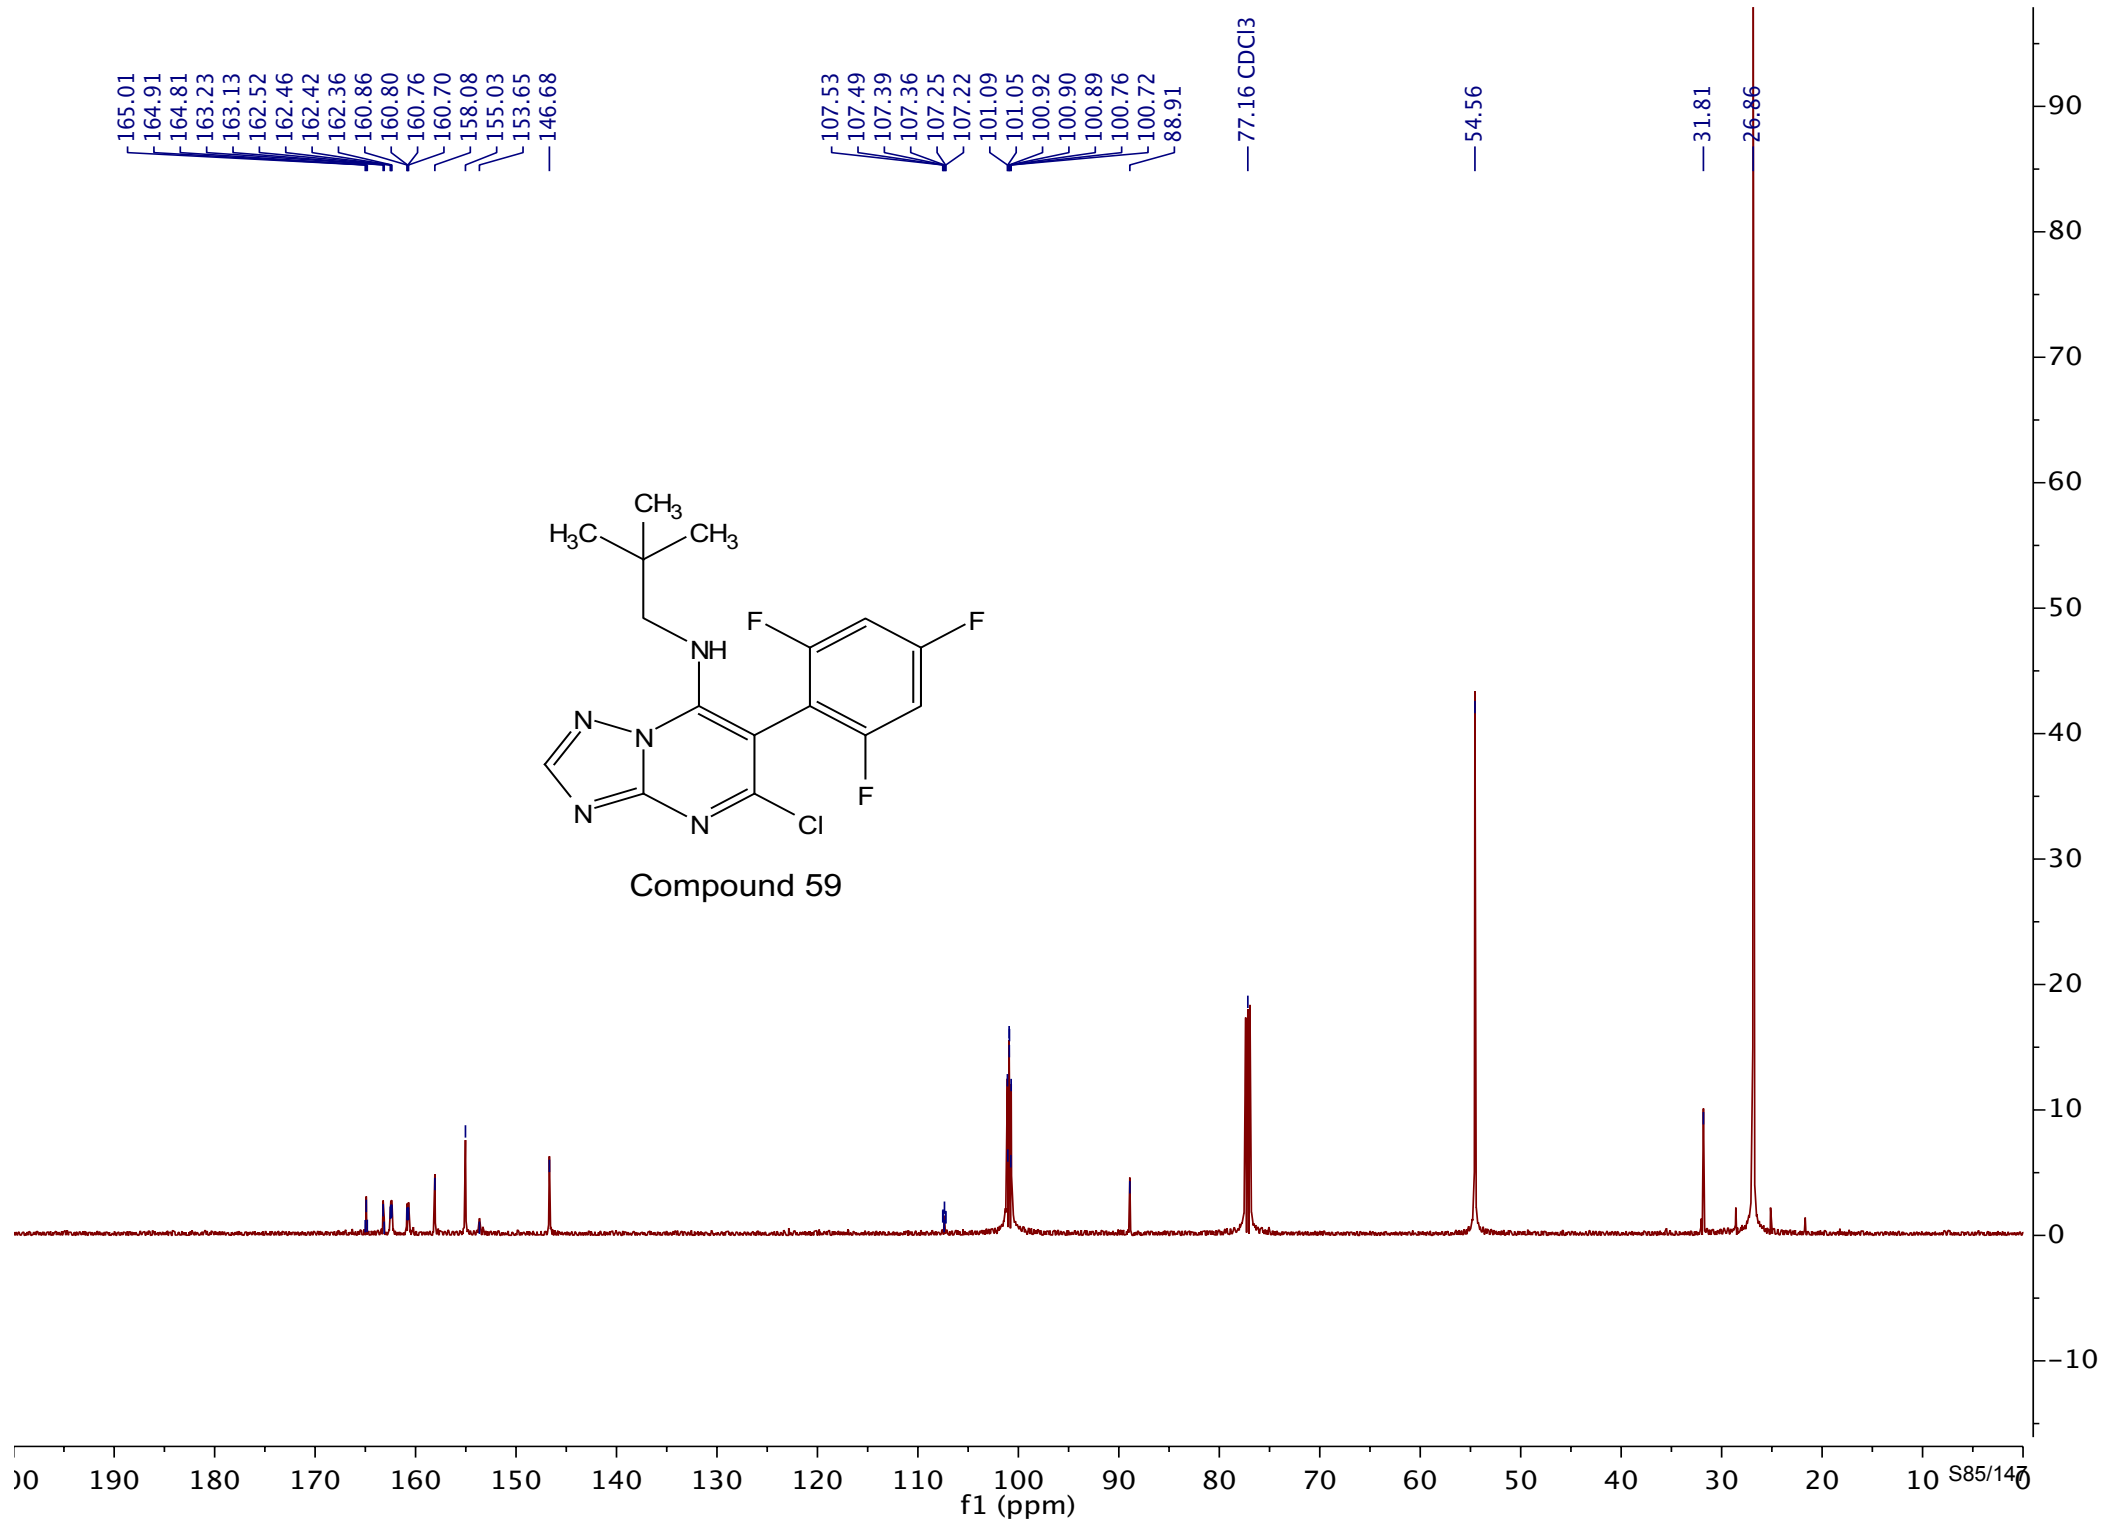

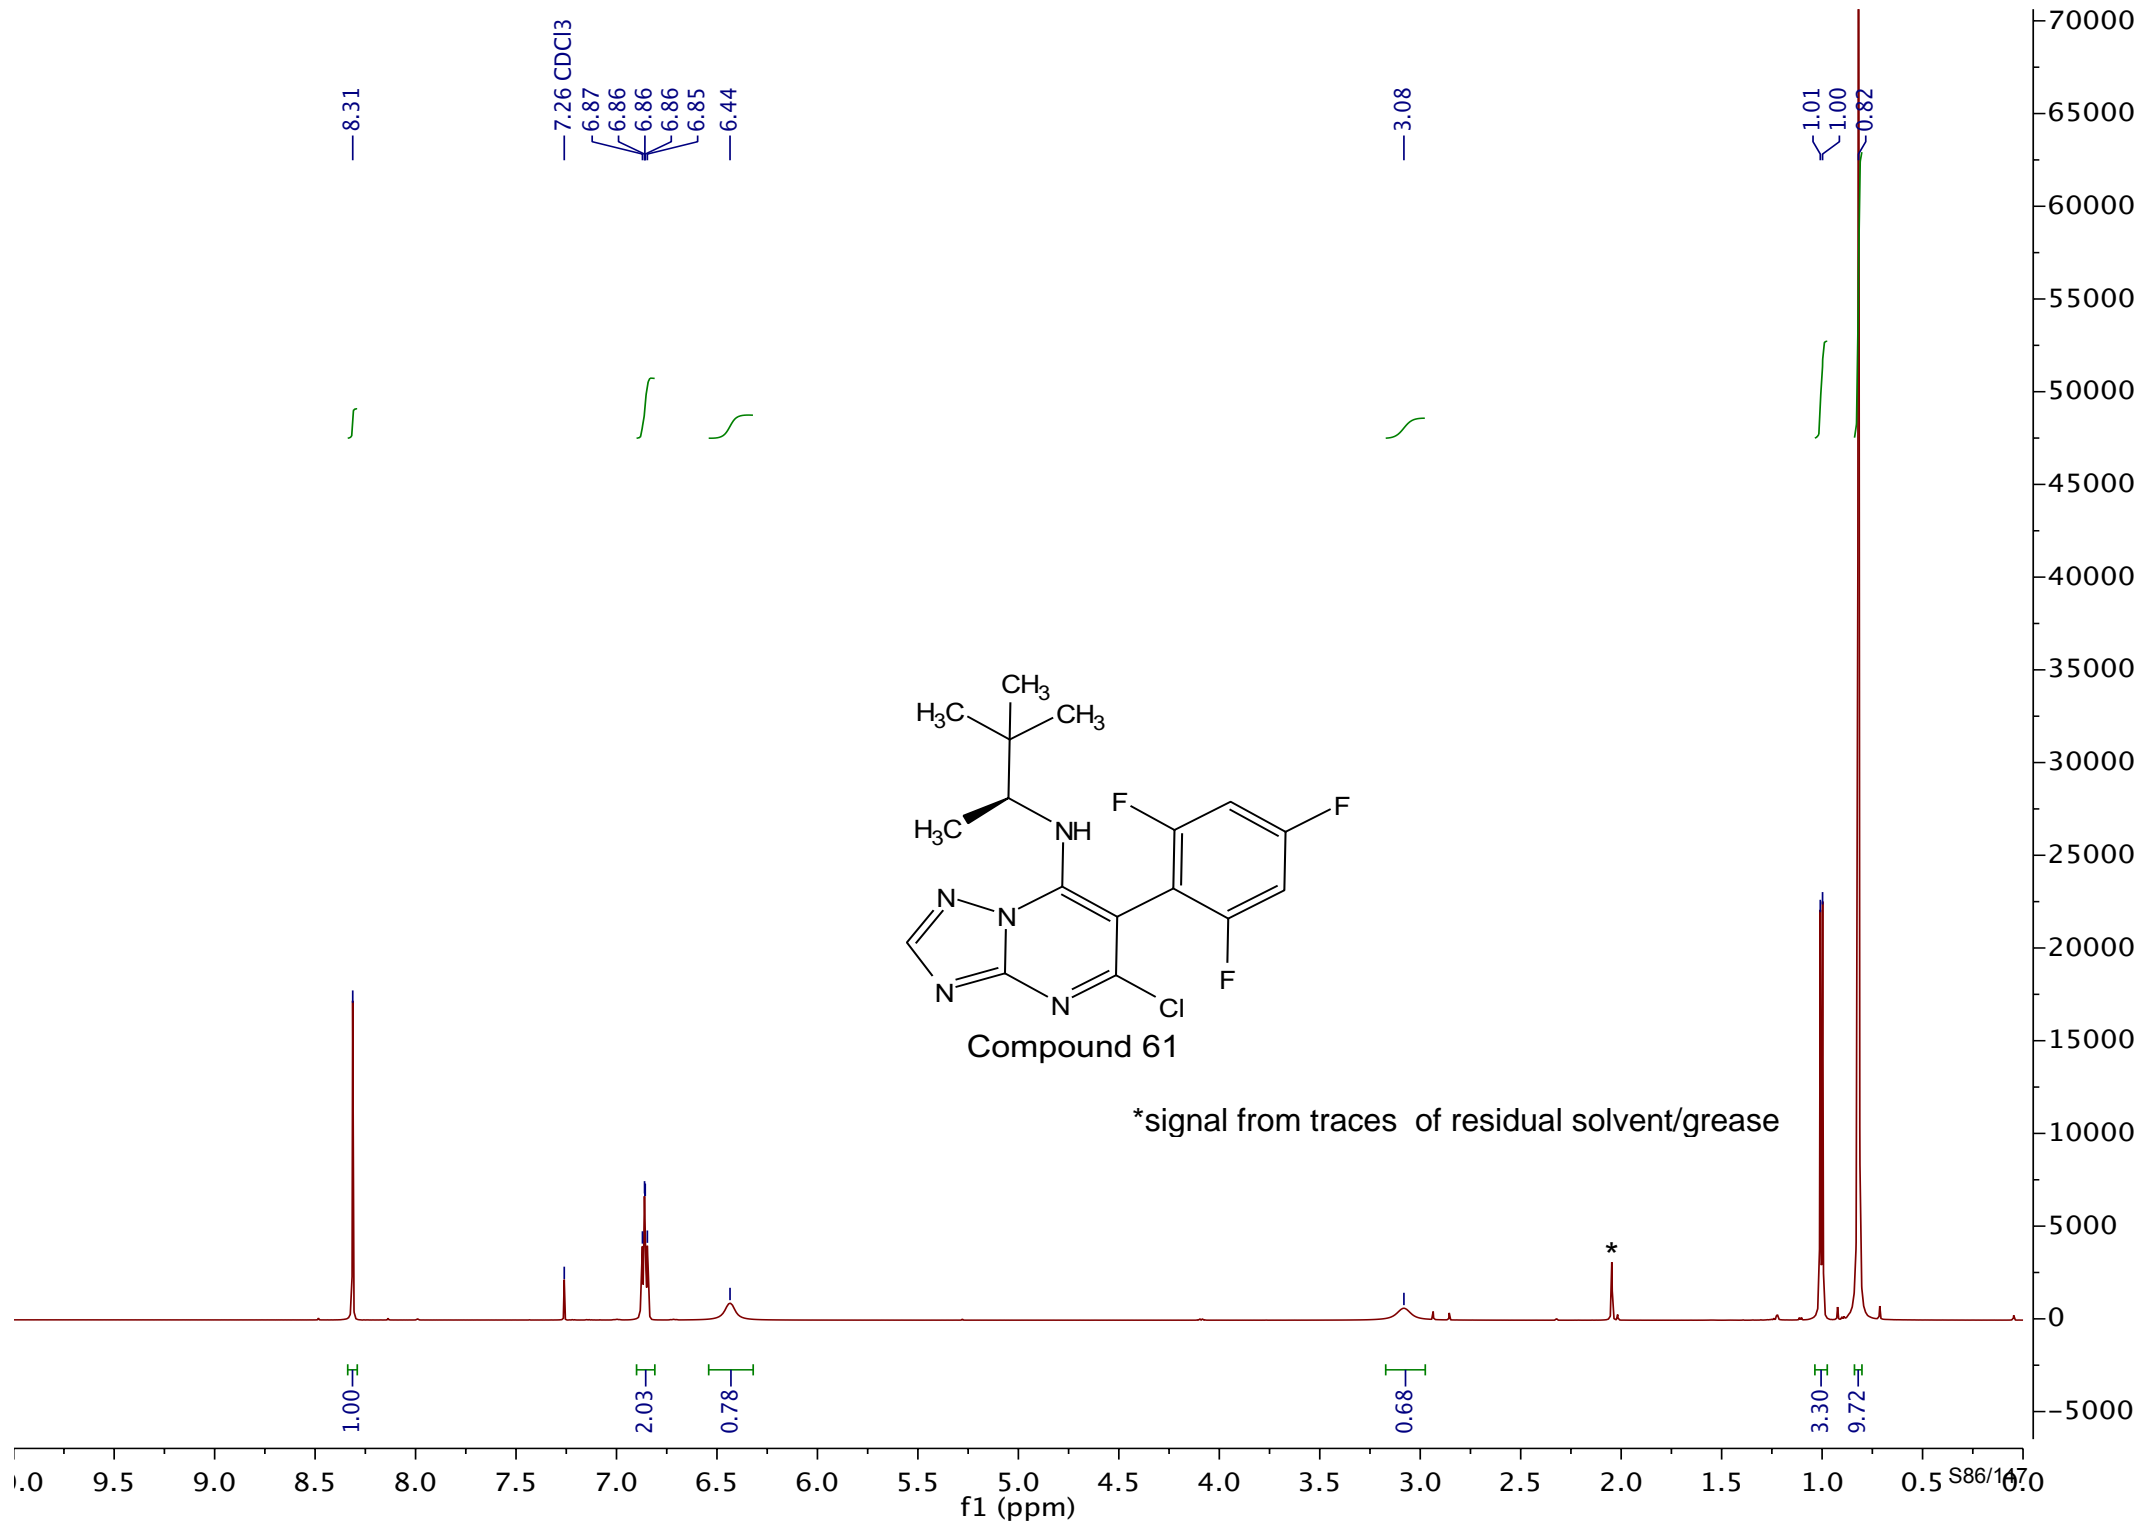

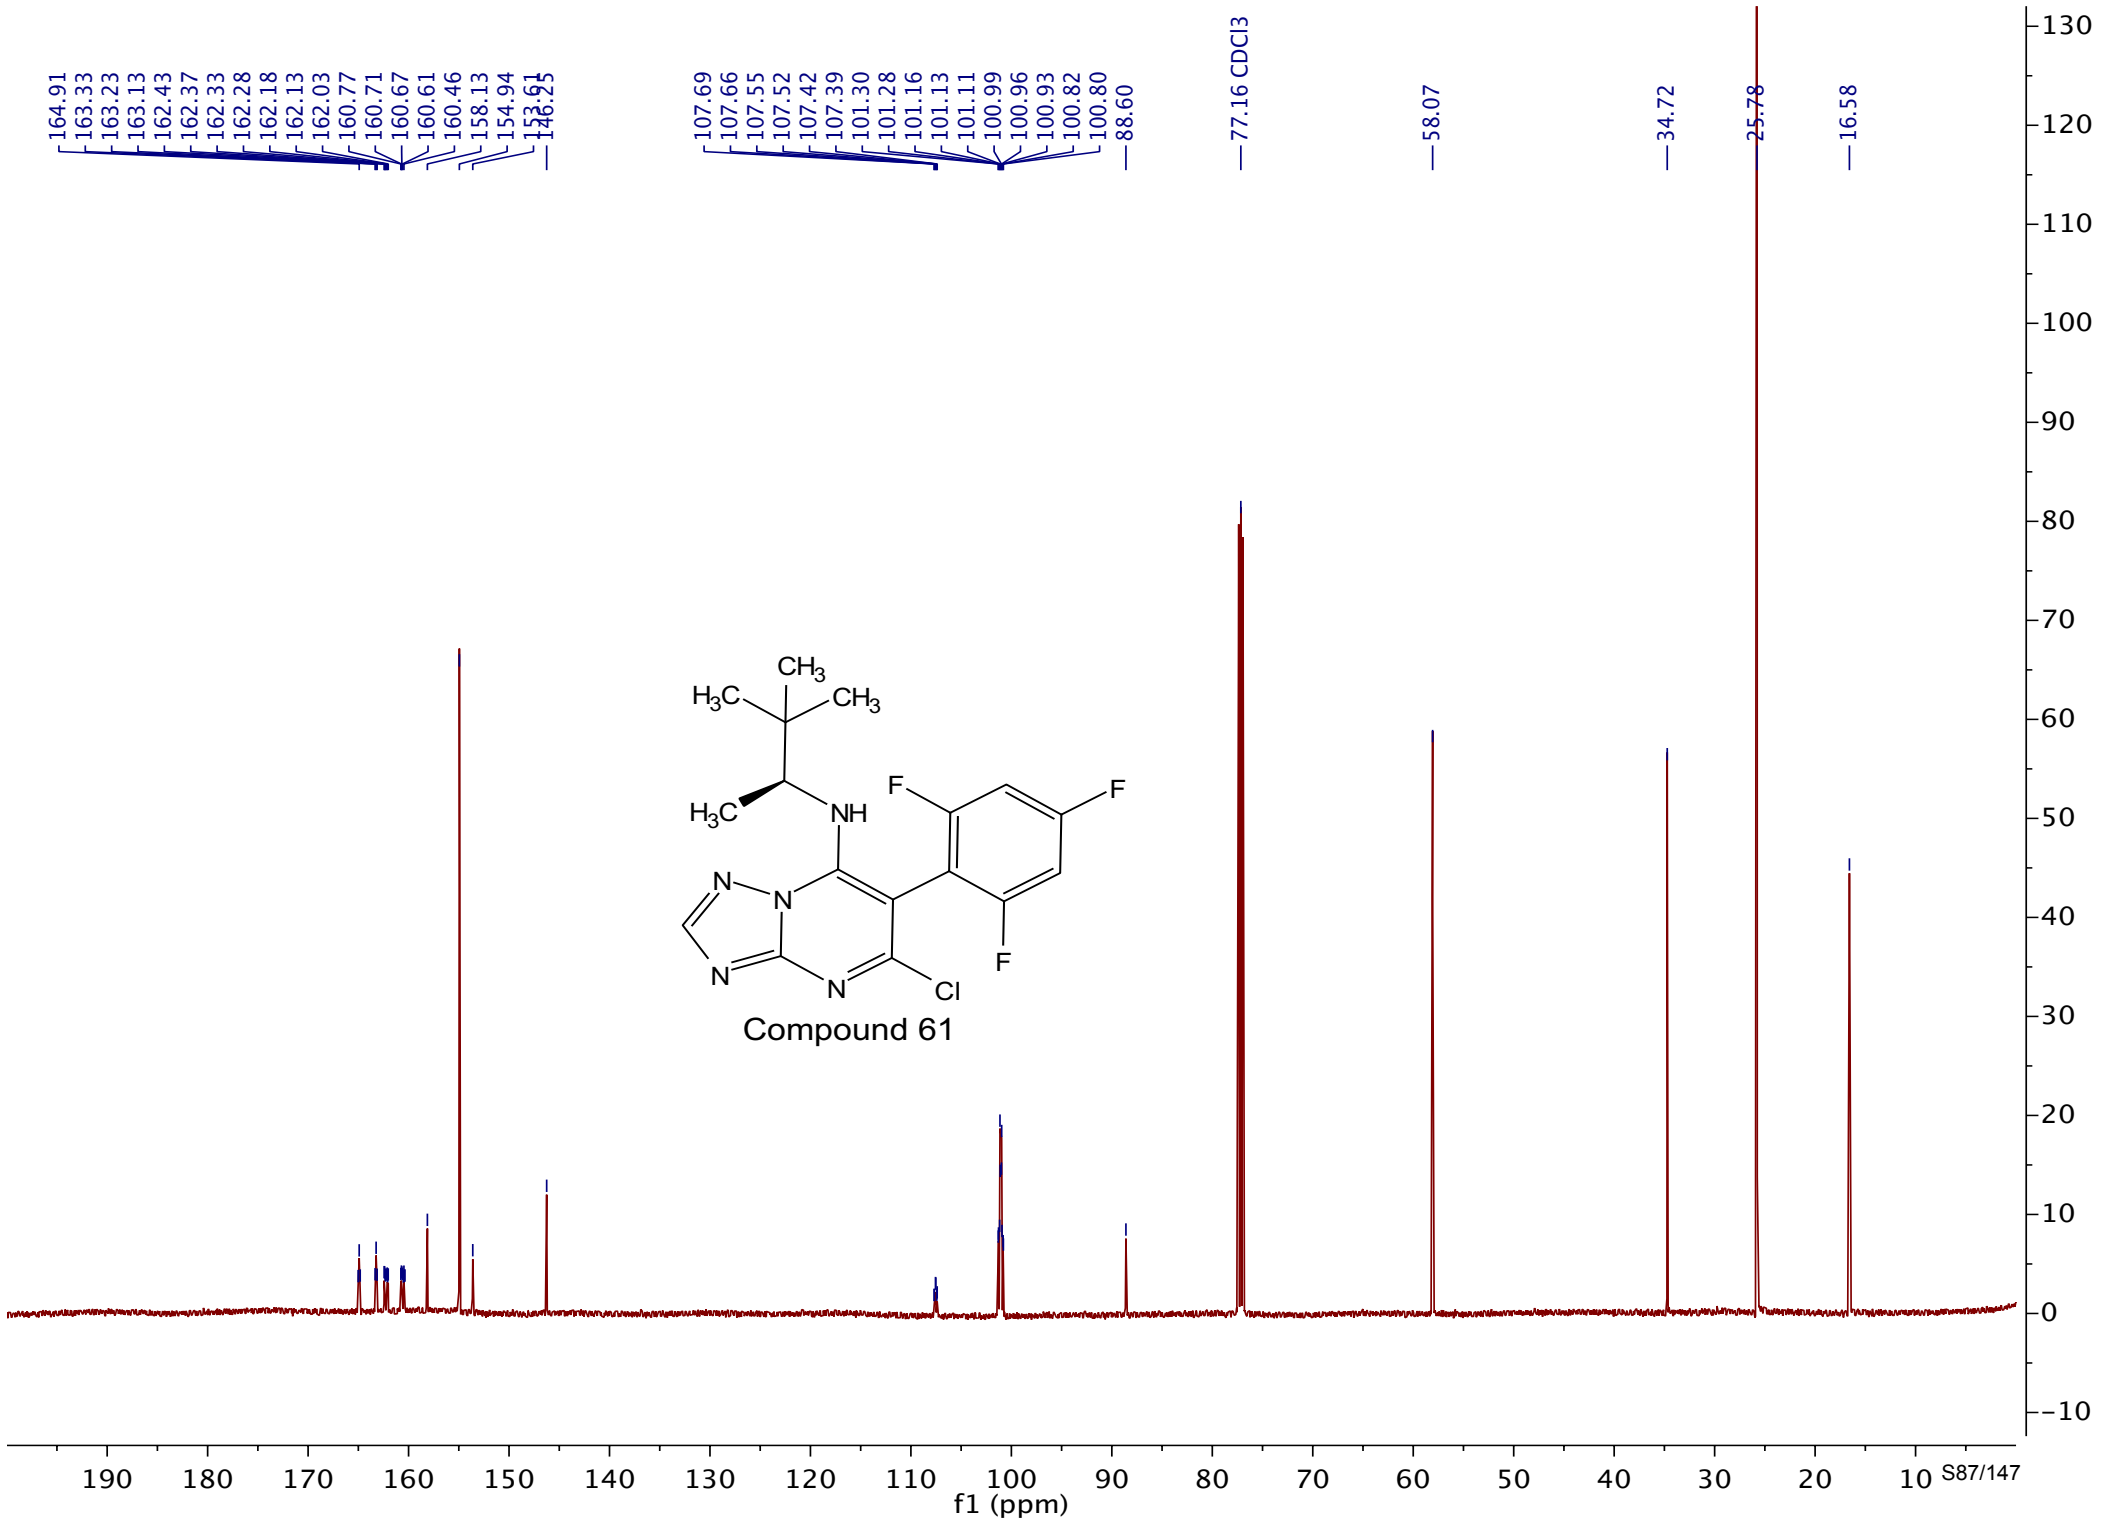



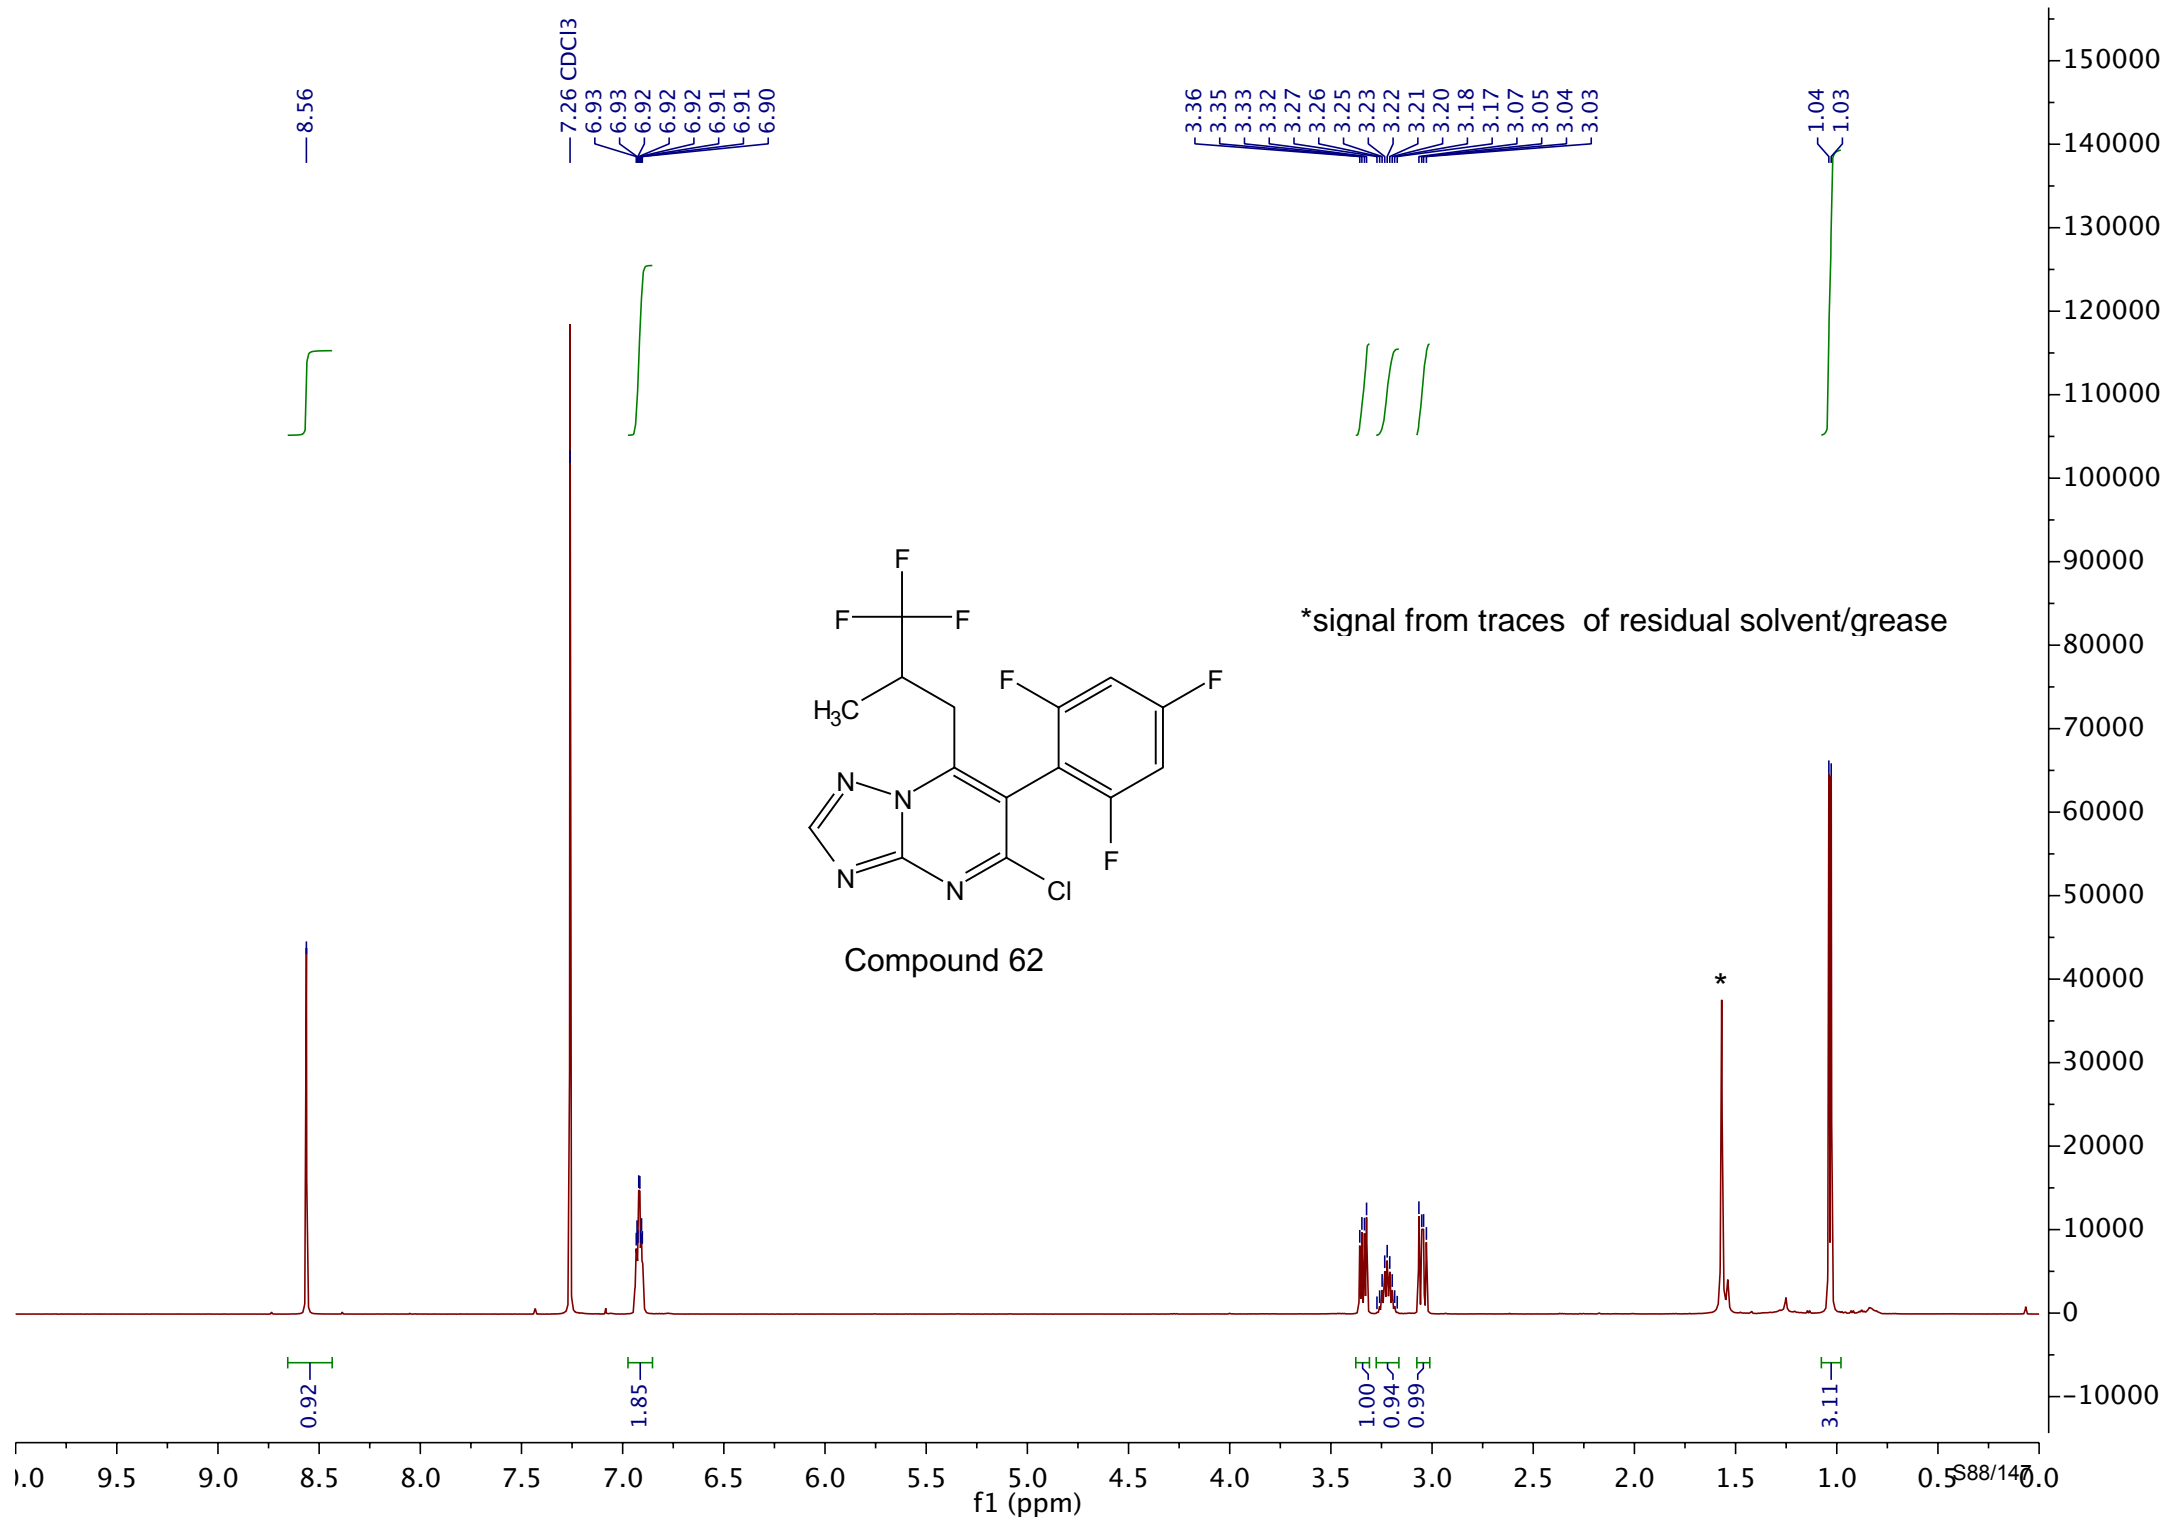

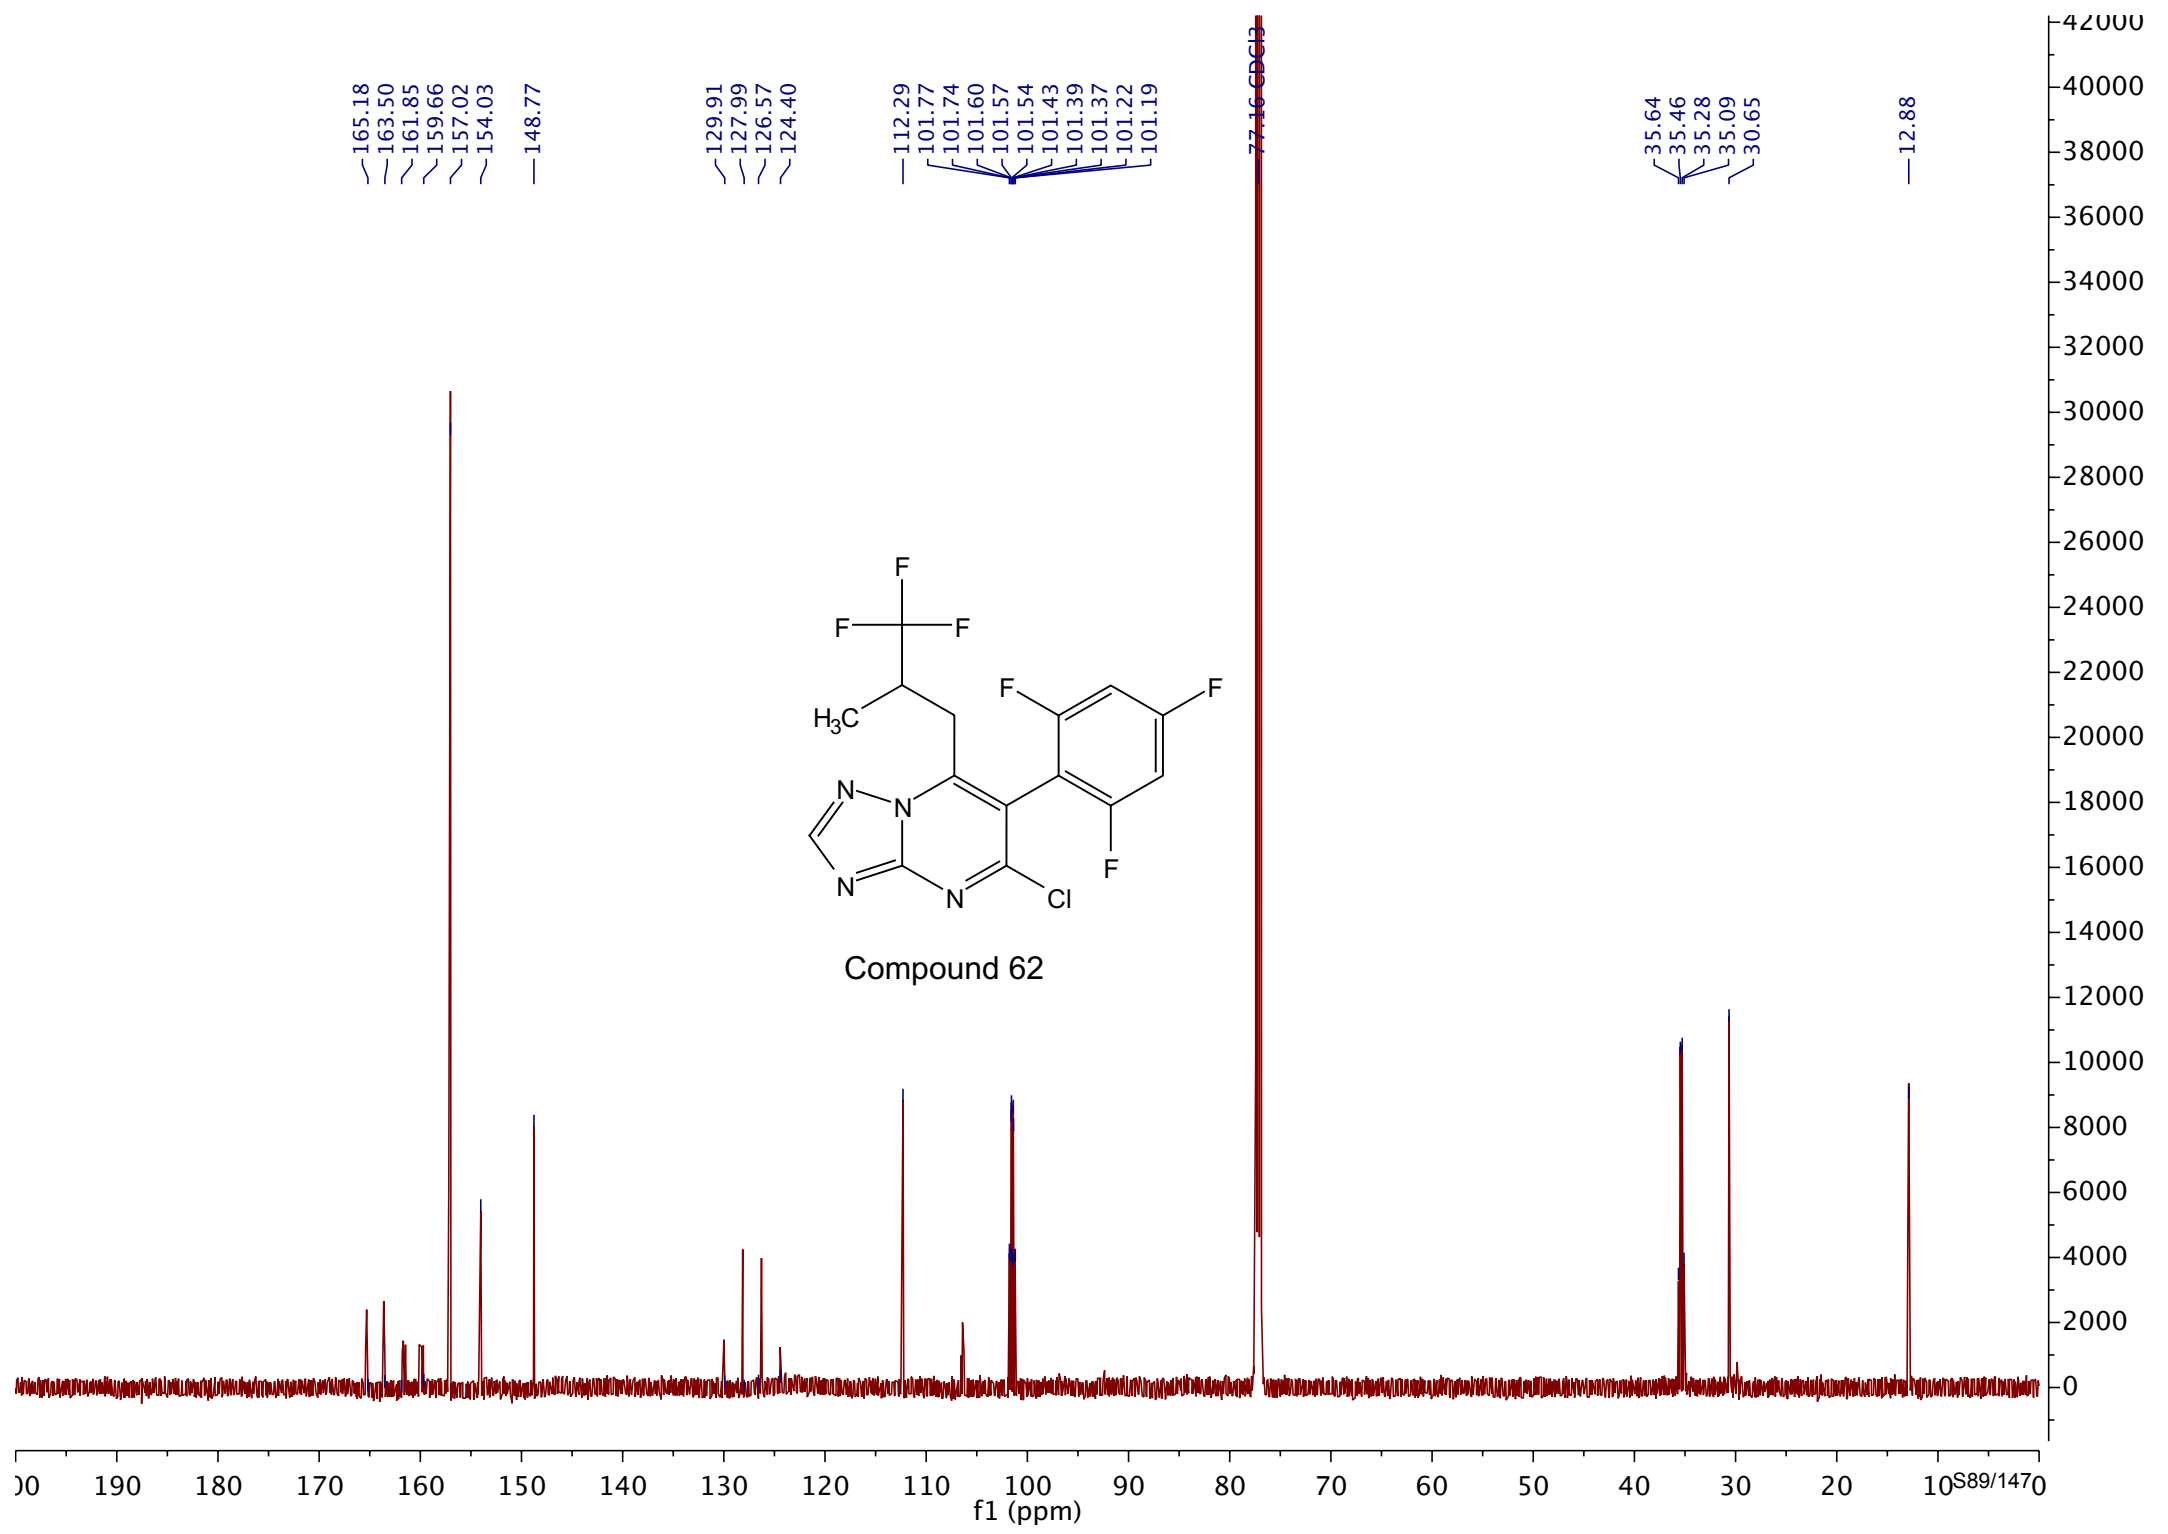

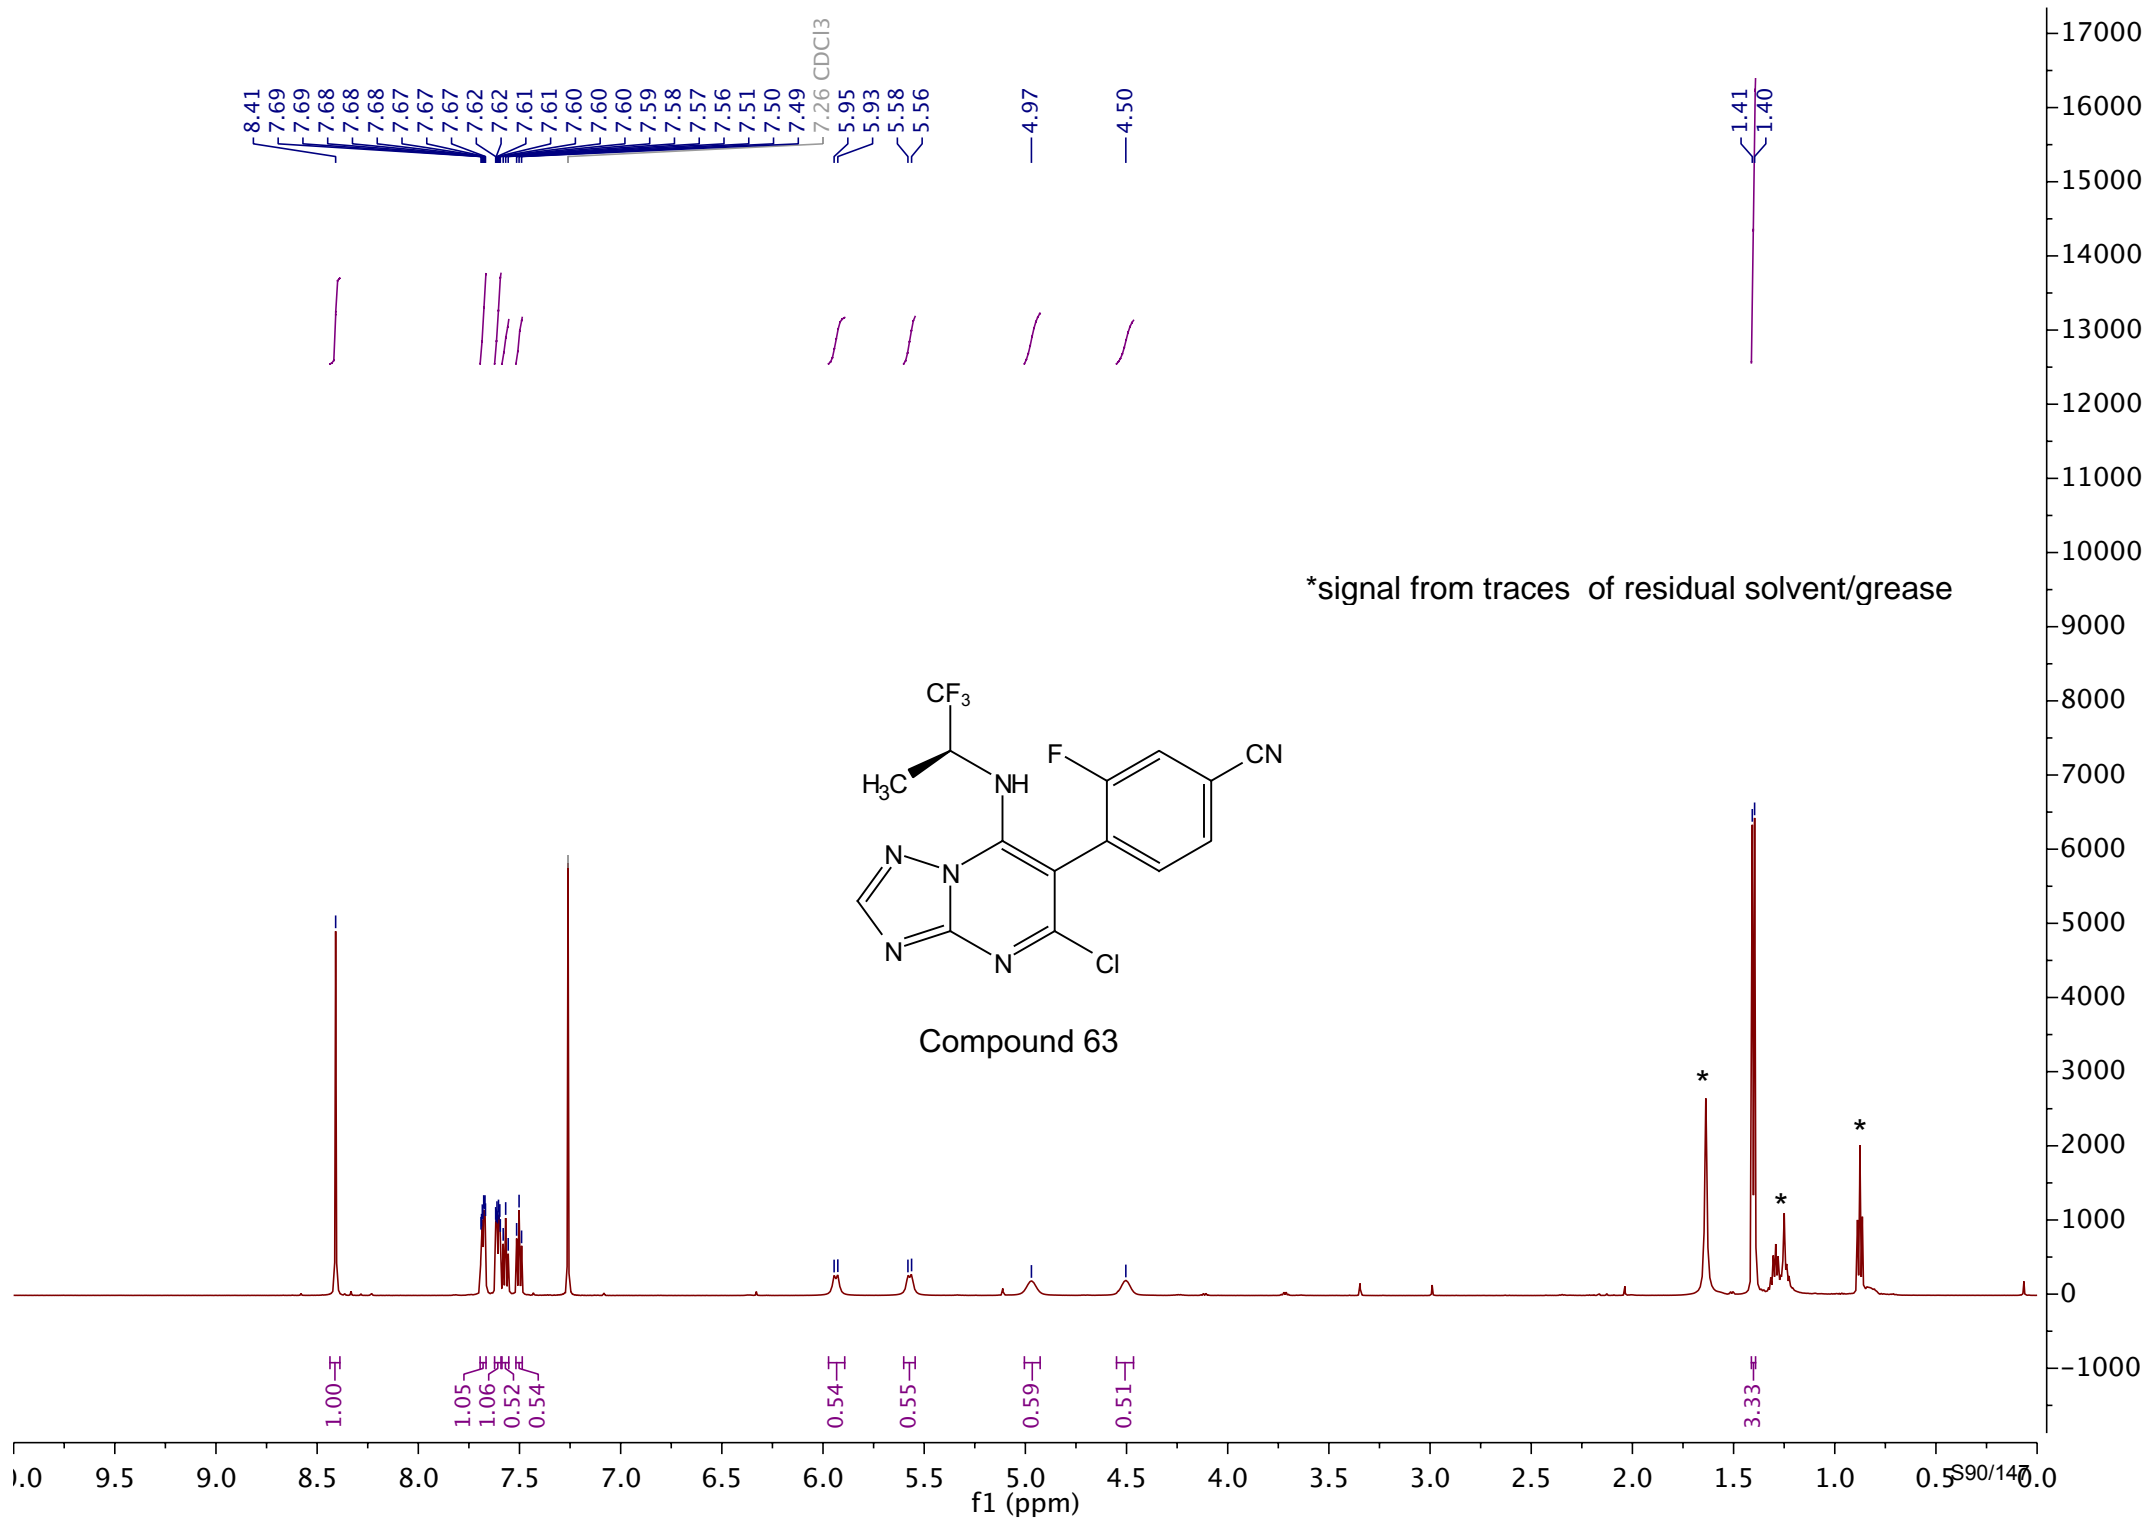

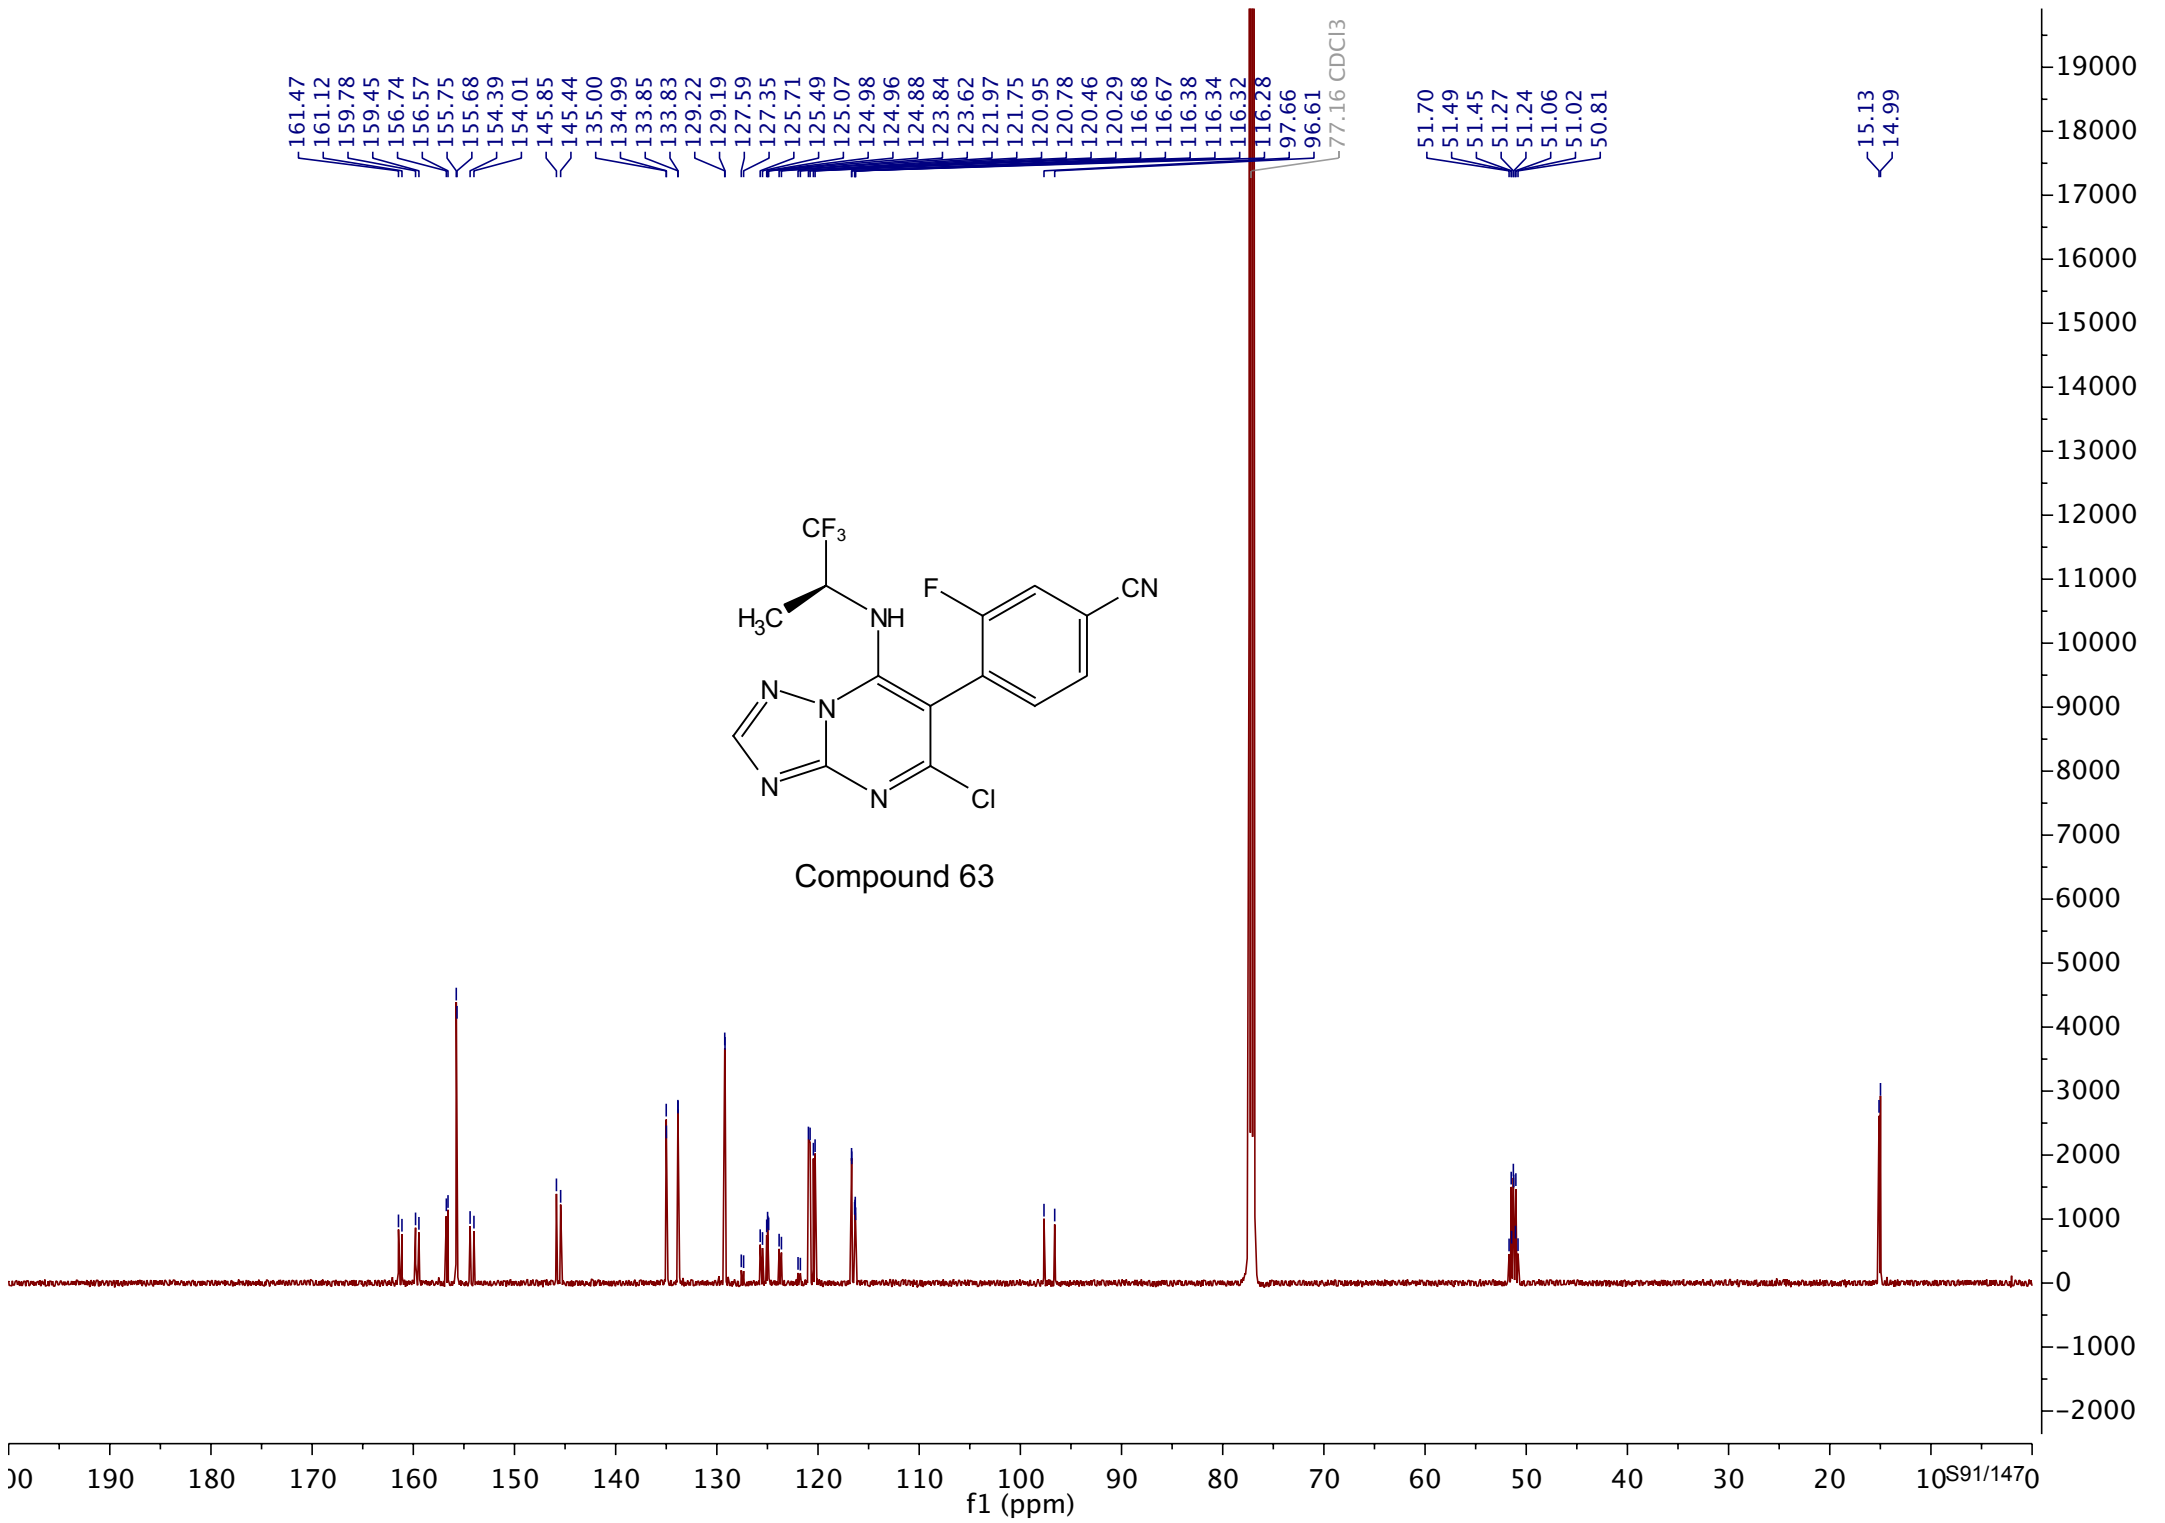

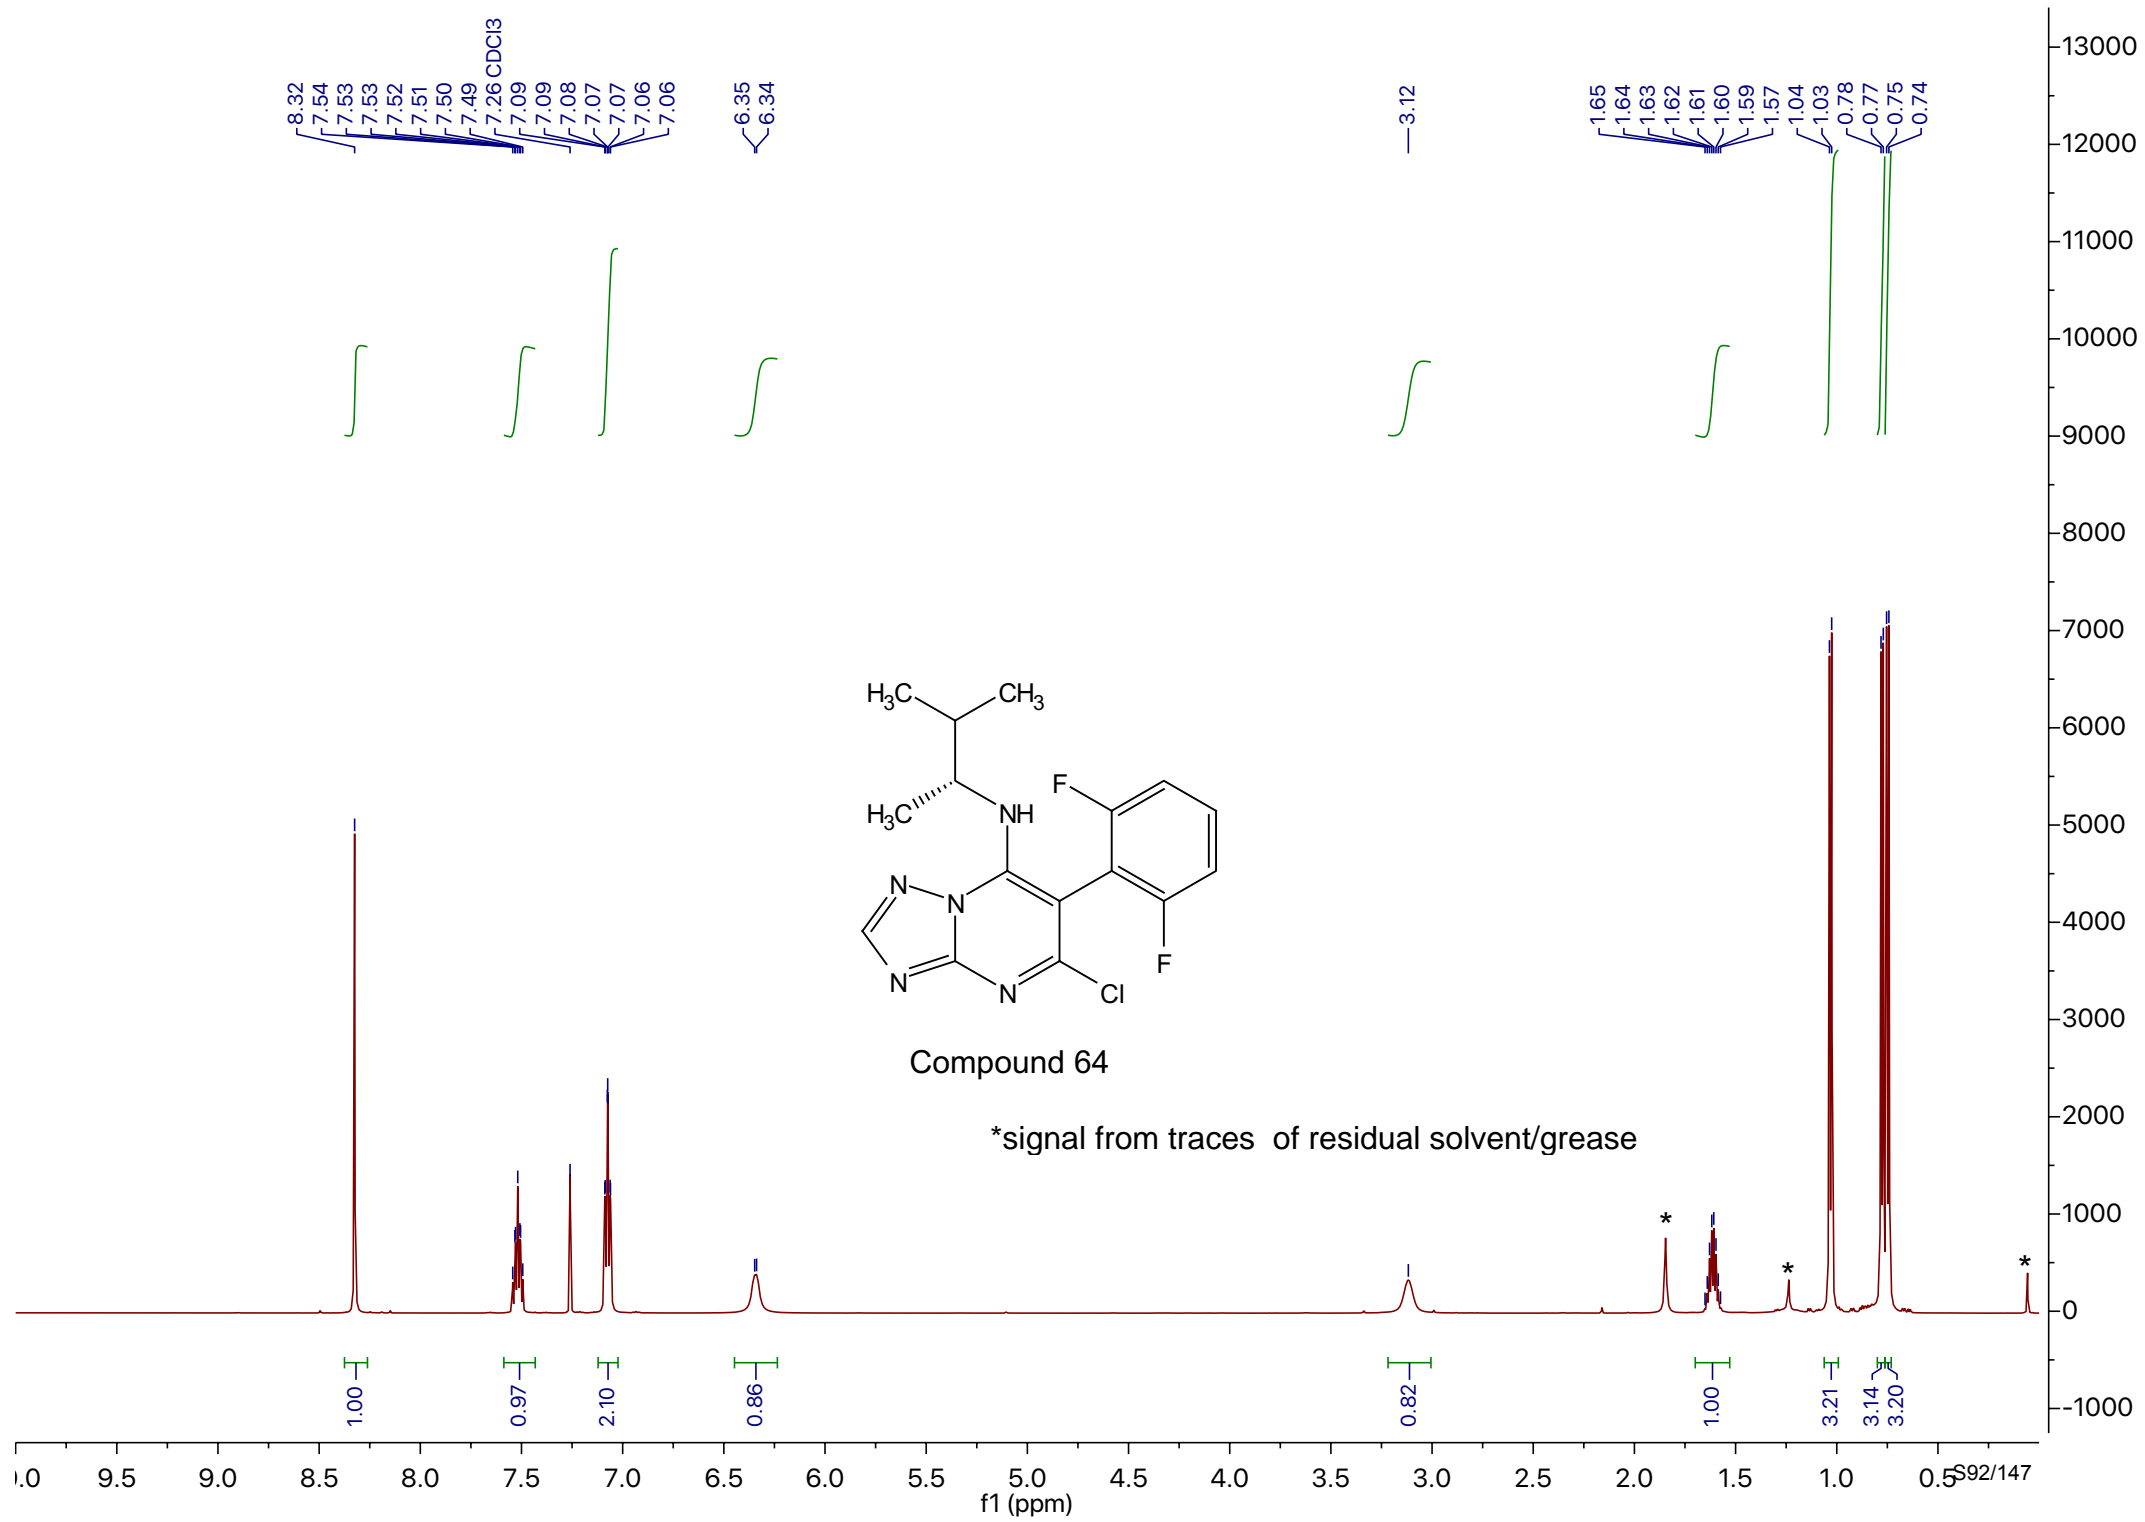

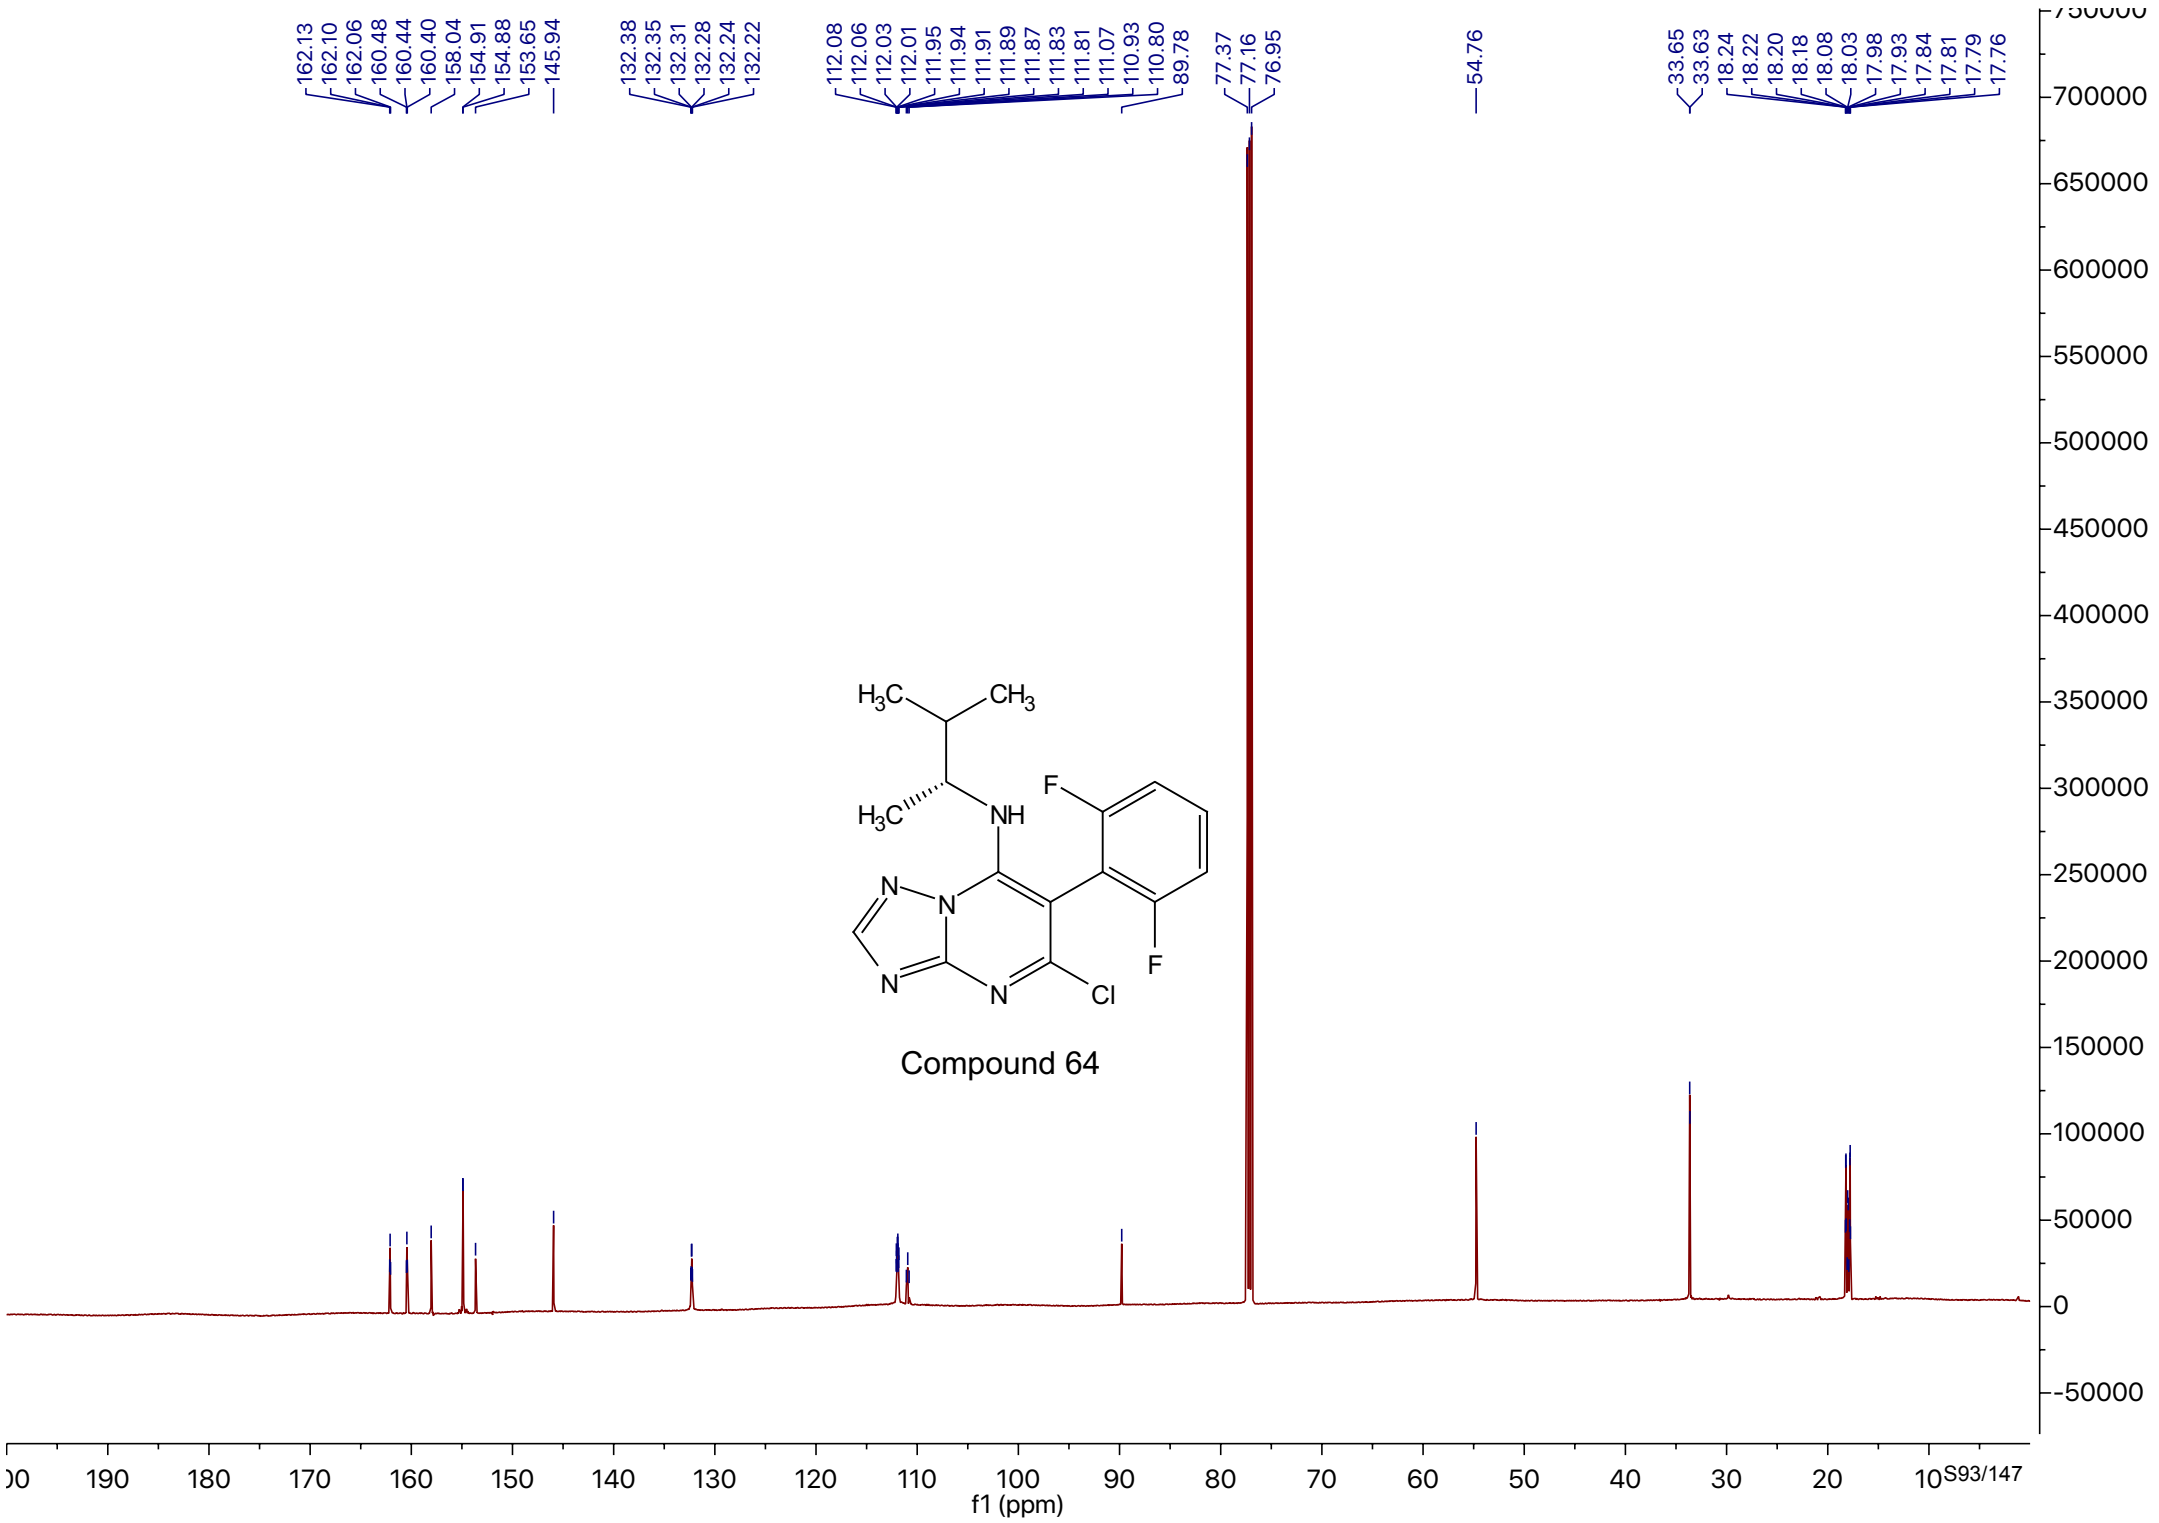

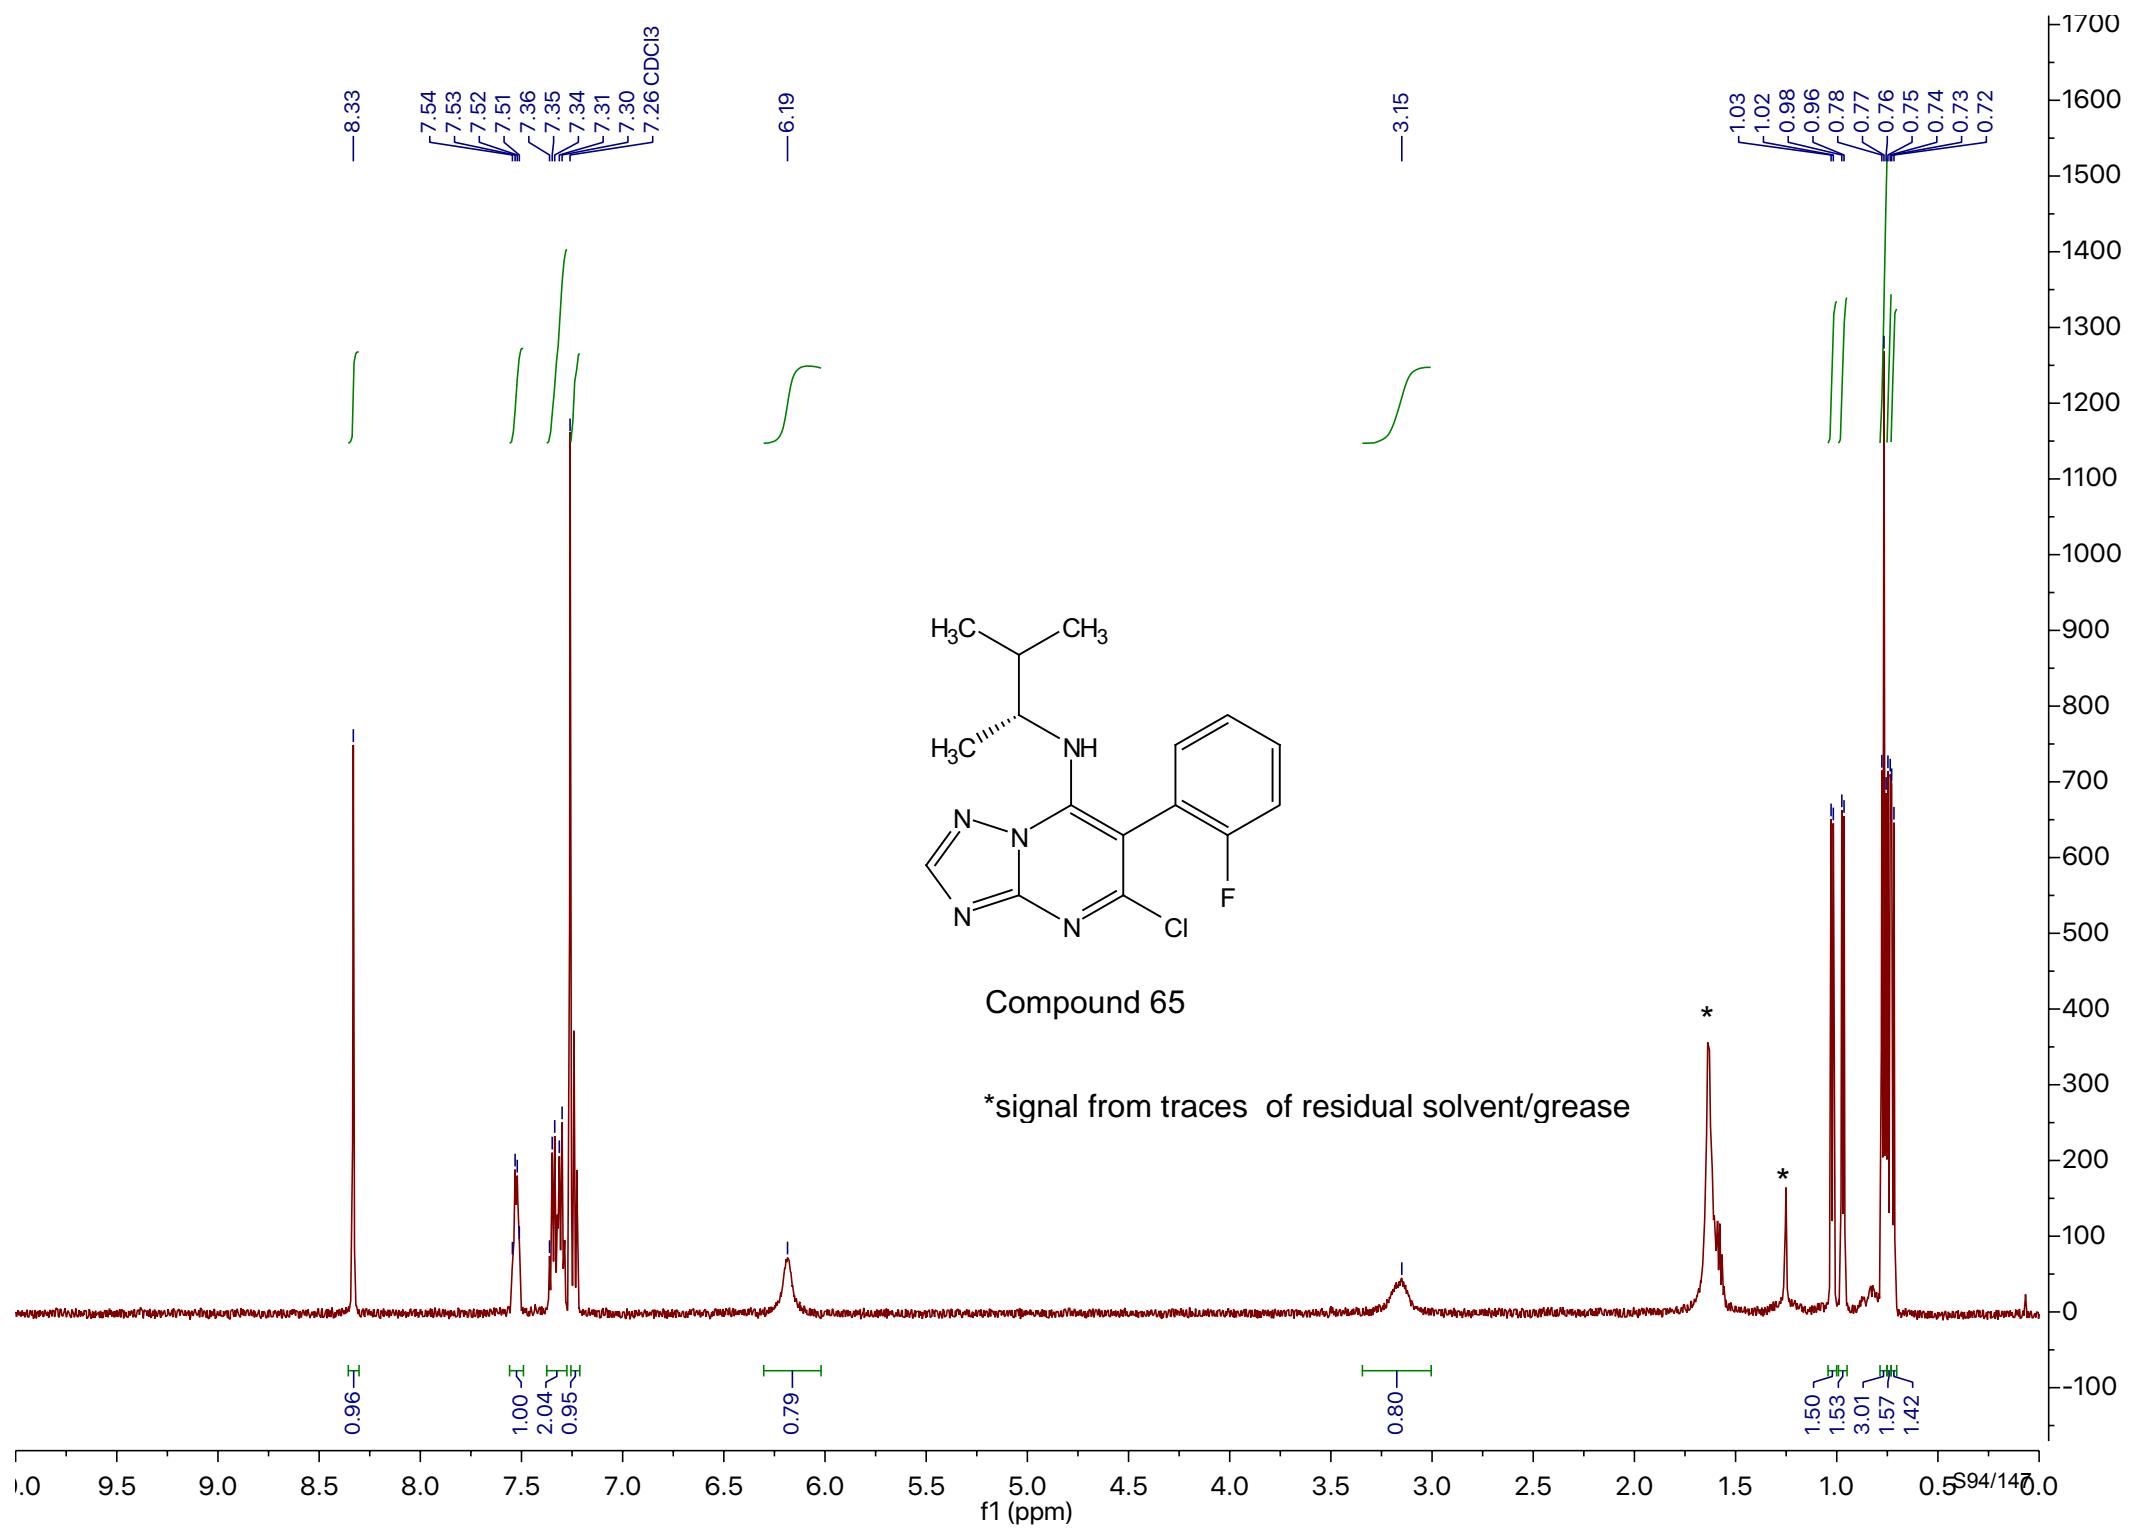

161.69  
161.63  
160.04  
159.98  
158.31  
158.23  
153.92  
152.71  
146.03  
133.62  
133.61  
132.99  
132.12  
132.06  
132.01  
124.97  
124.94  
124.91  
124.89  
121.05  
120.94  
120.88  
120.77  
116.49  
116.48  
116.34  
116.33  
97.15  
97.00

54.76  
54.60

33.78  
33.48

18.29  
17.99  
17.82  
17.74  
17.63

77.16 CDCl<sub>3</sub>

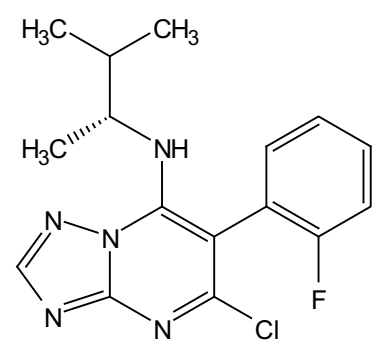

Compound 65

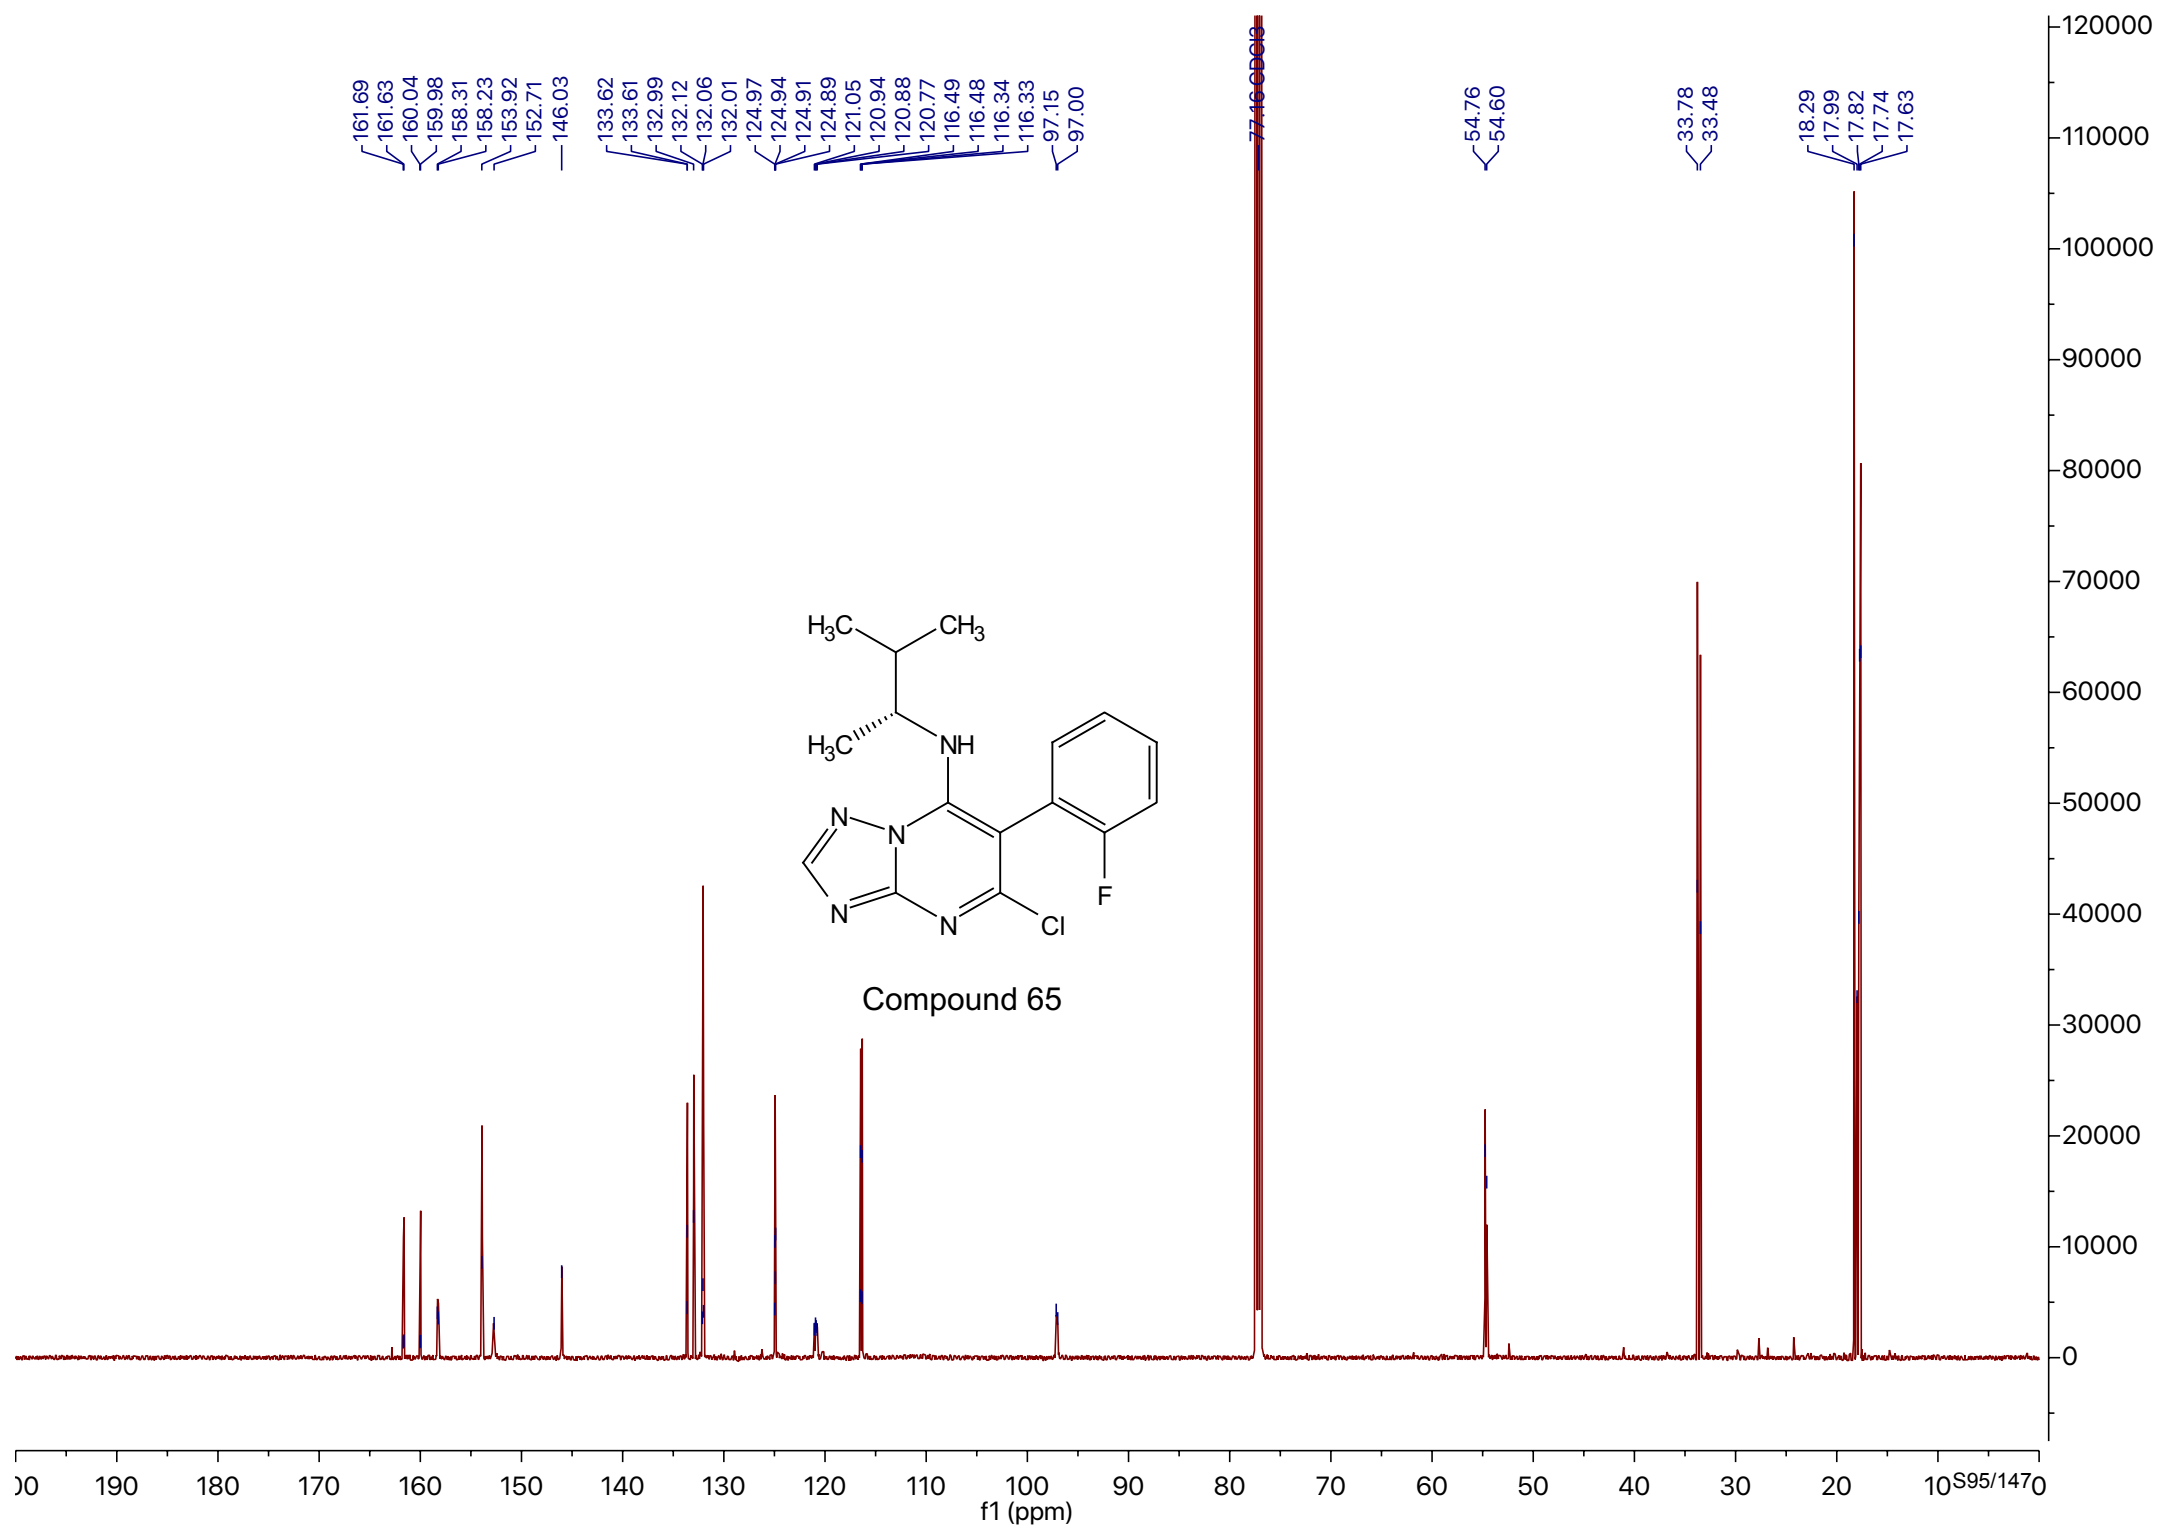



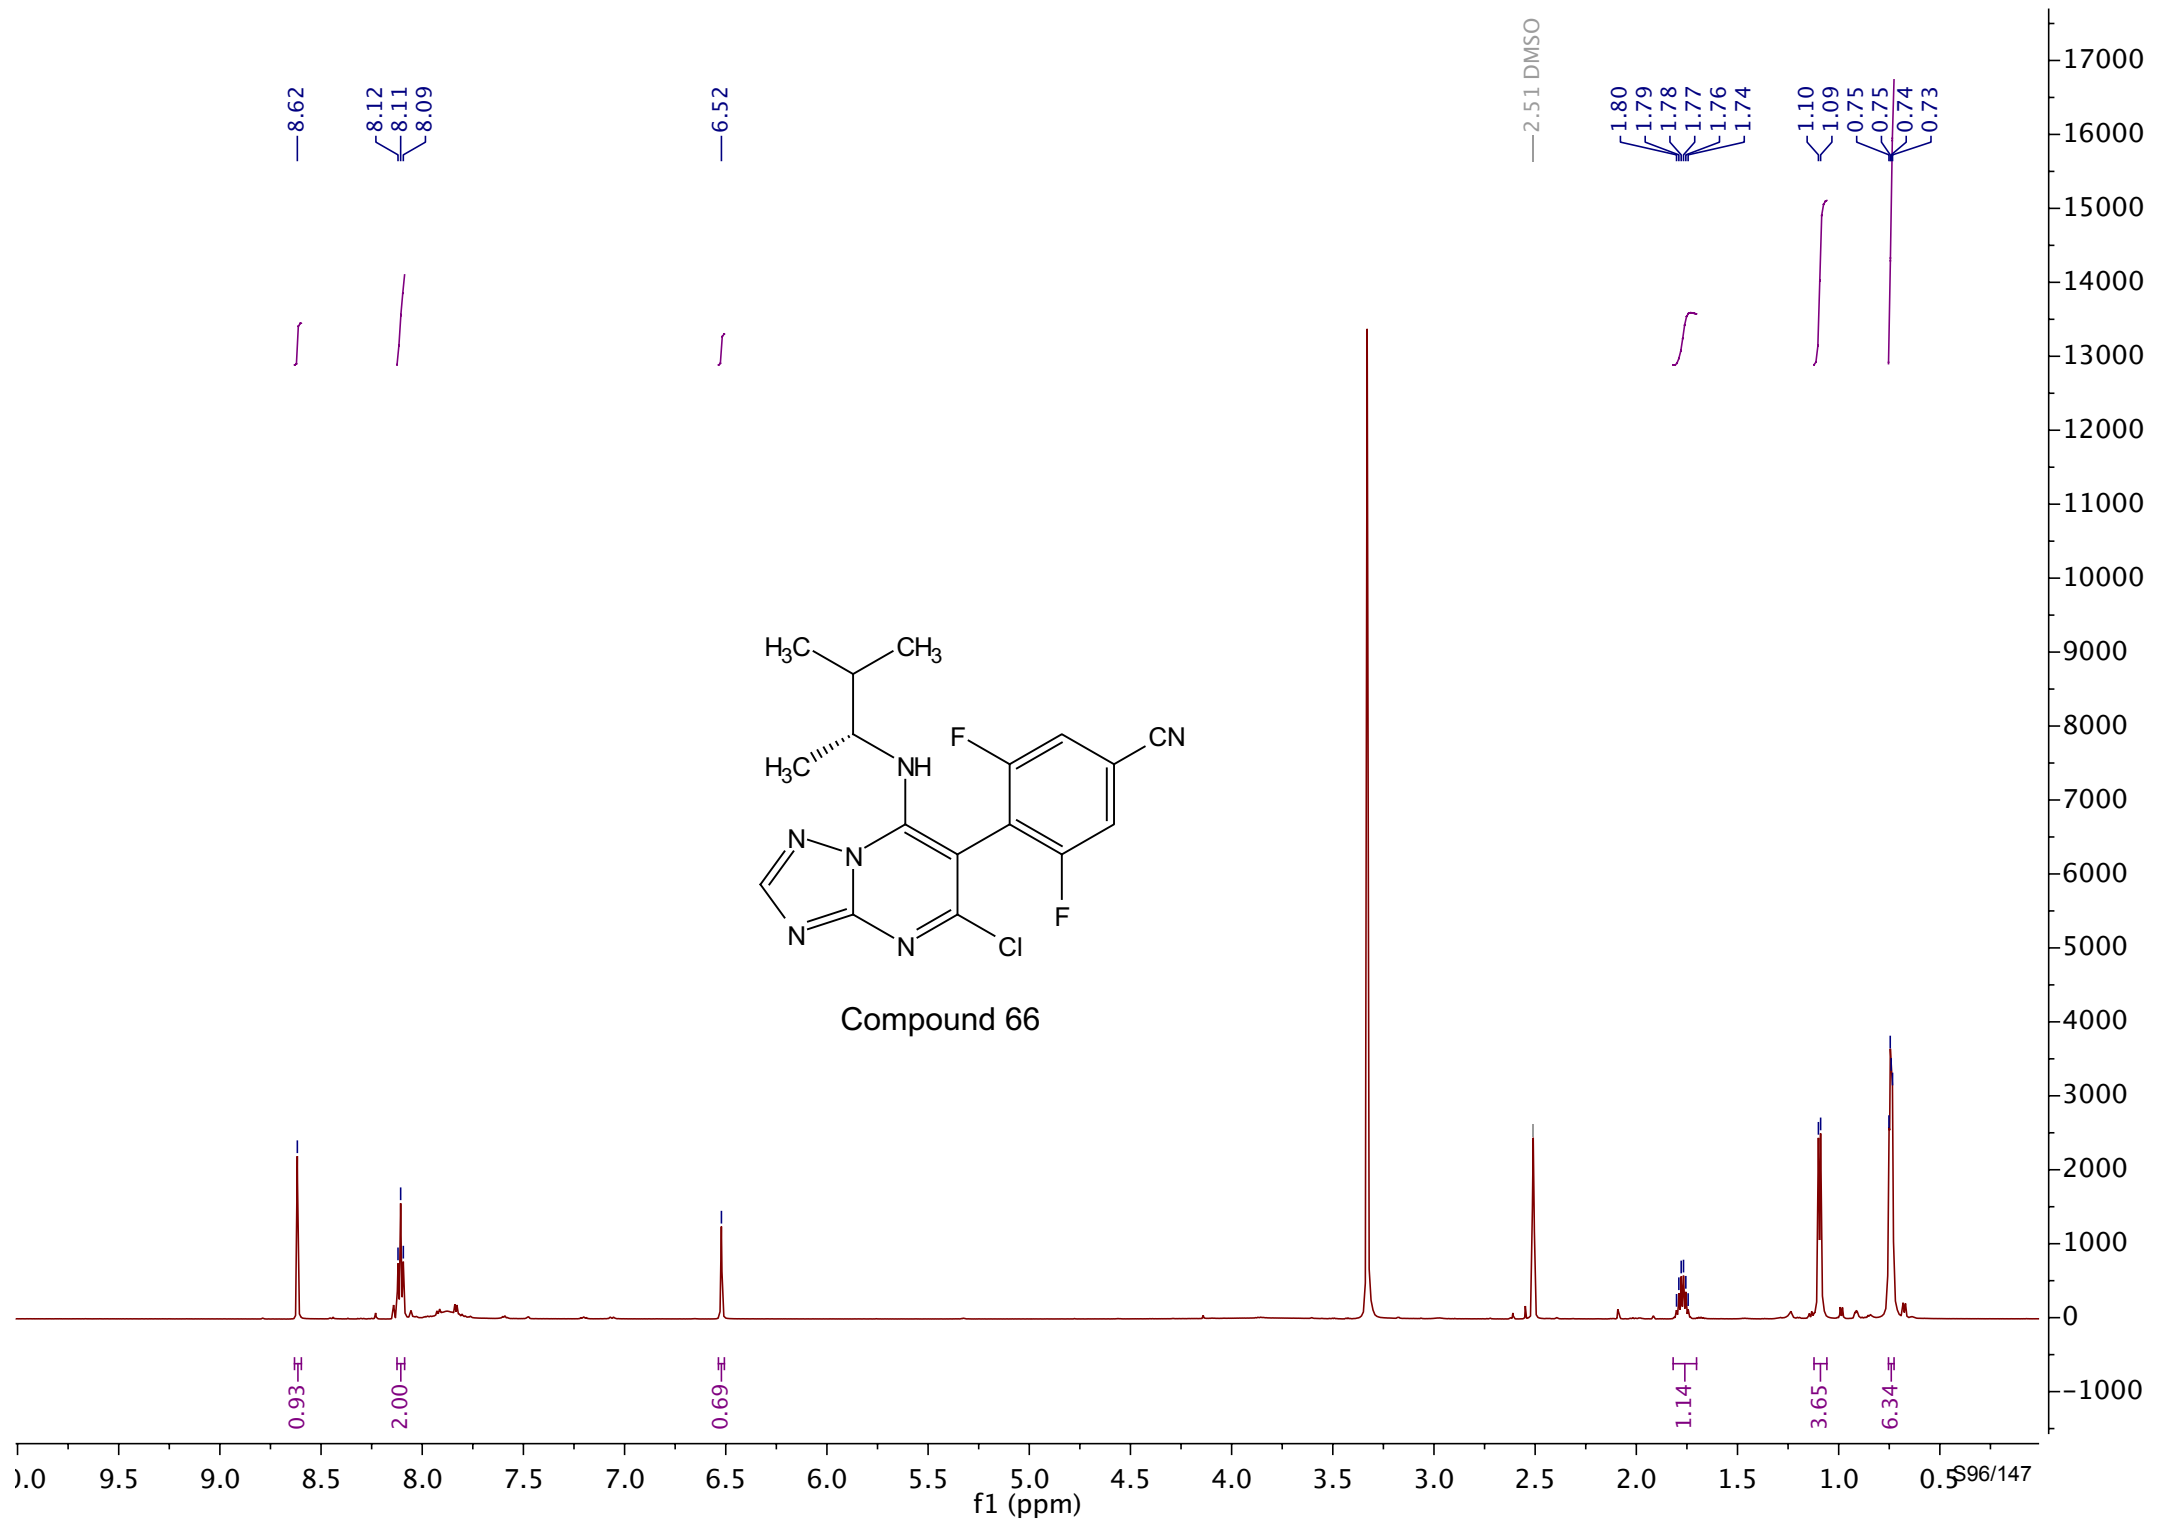

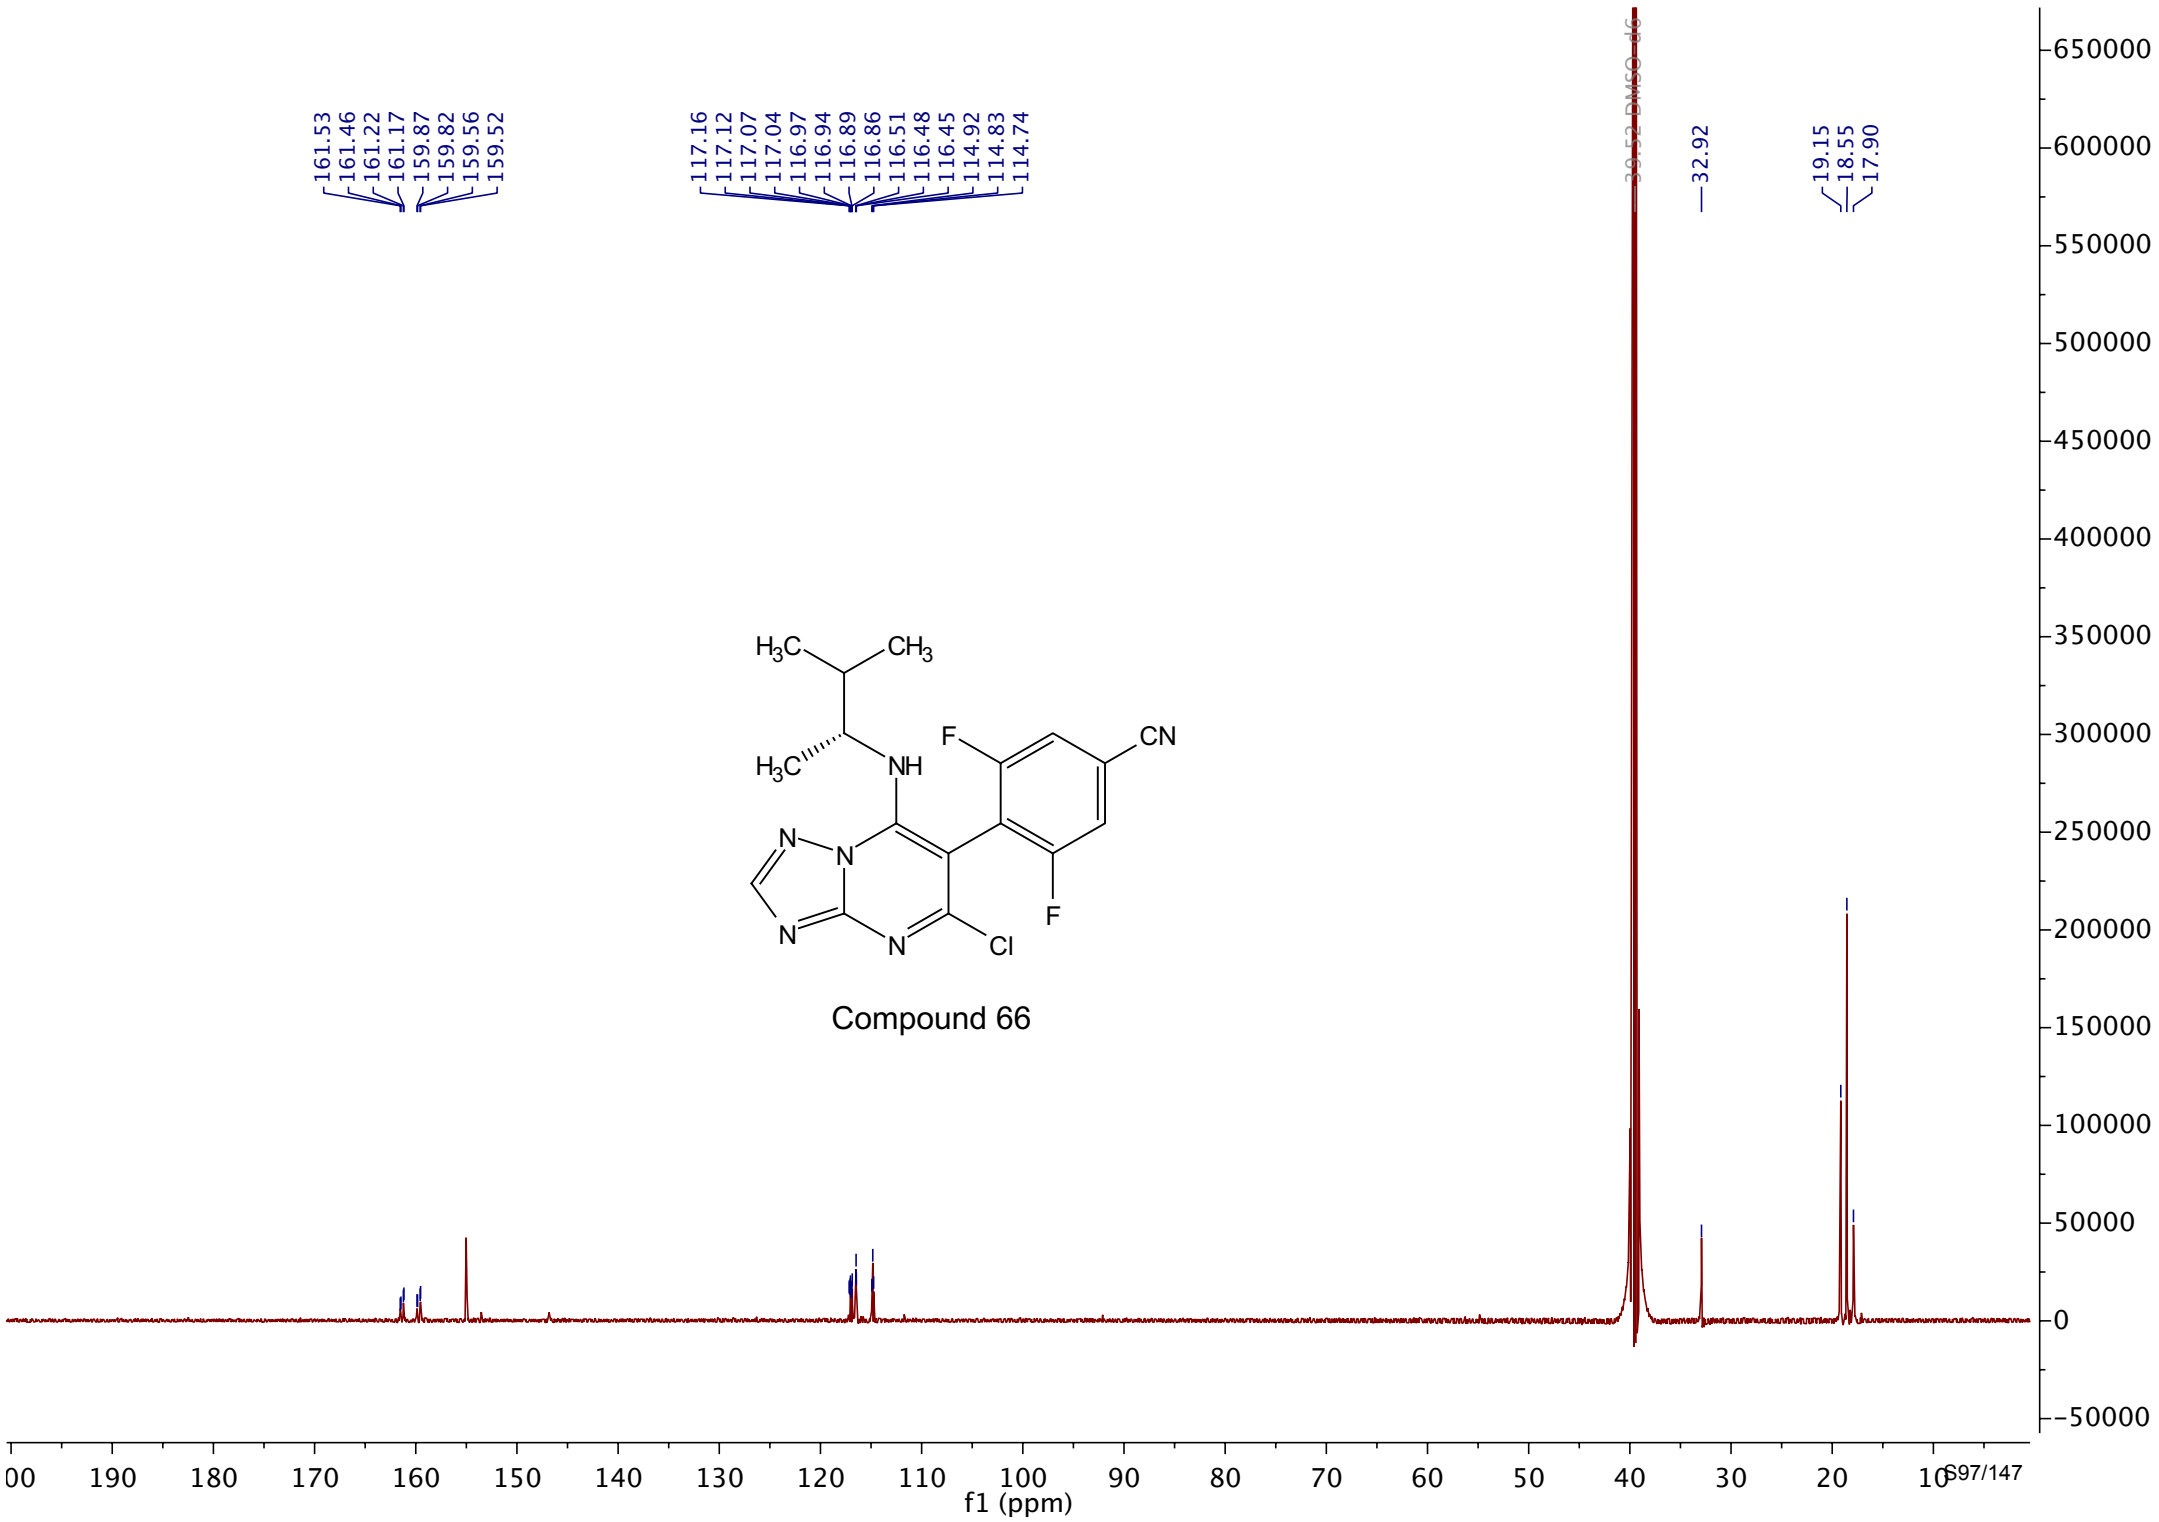

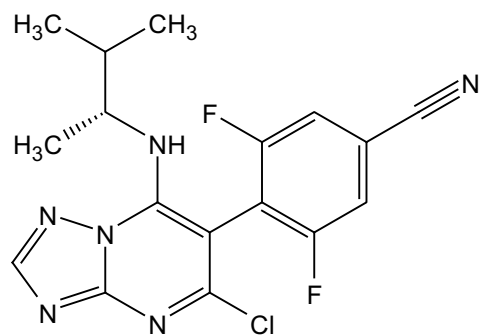

Compound 66

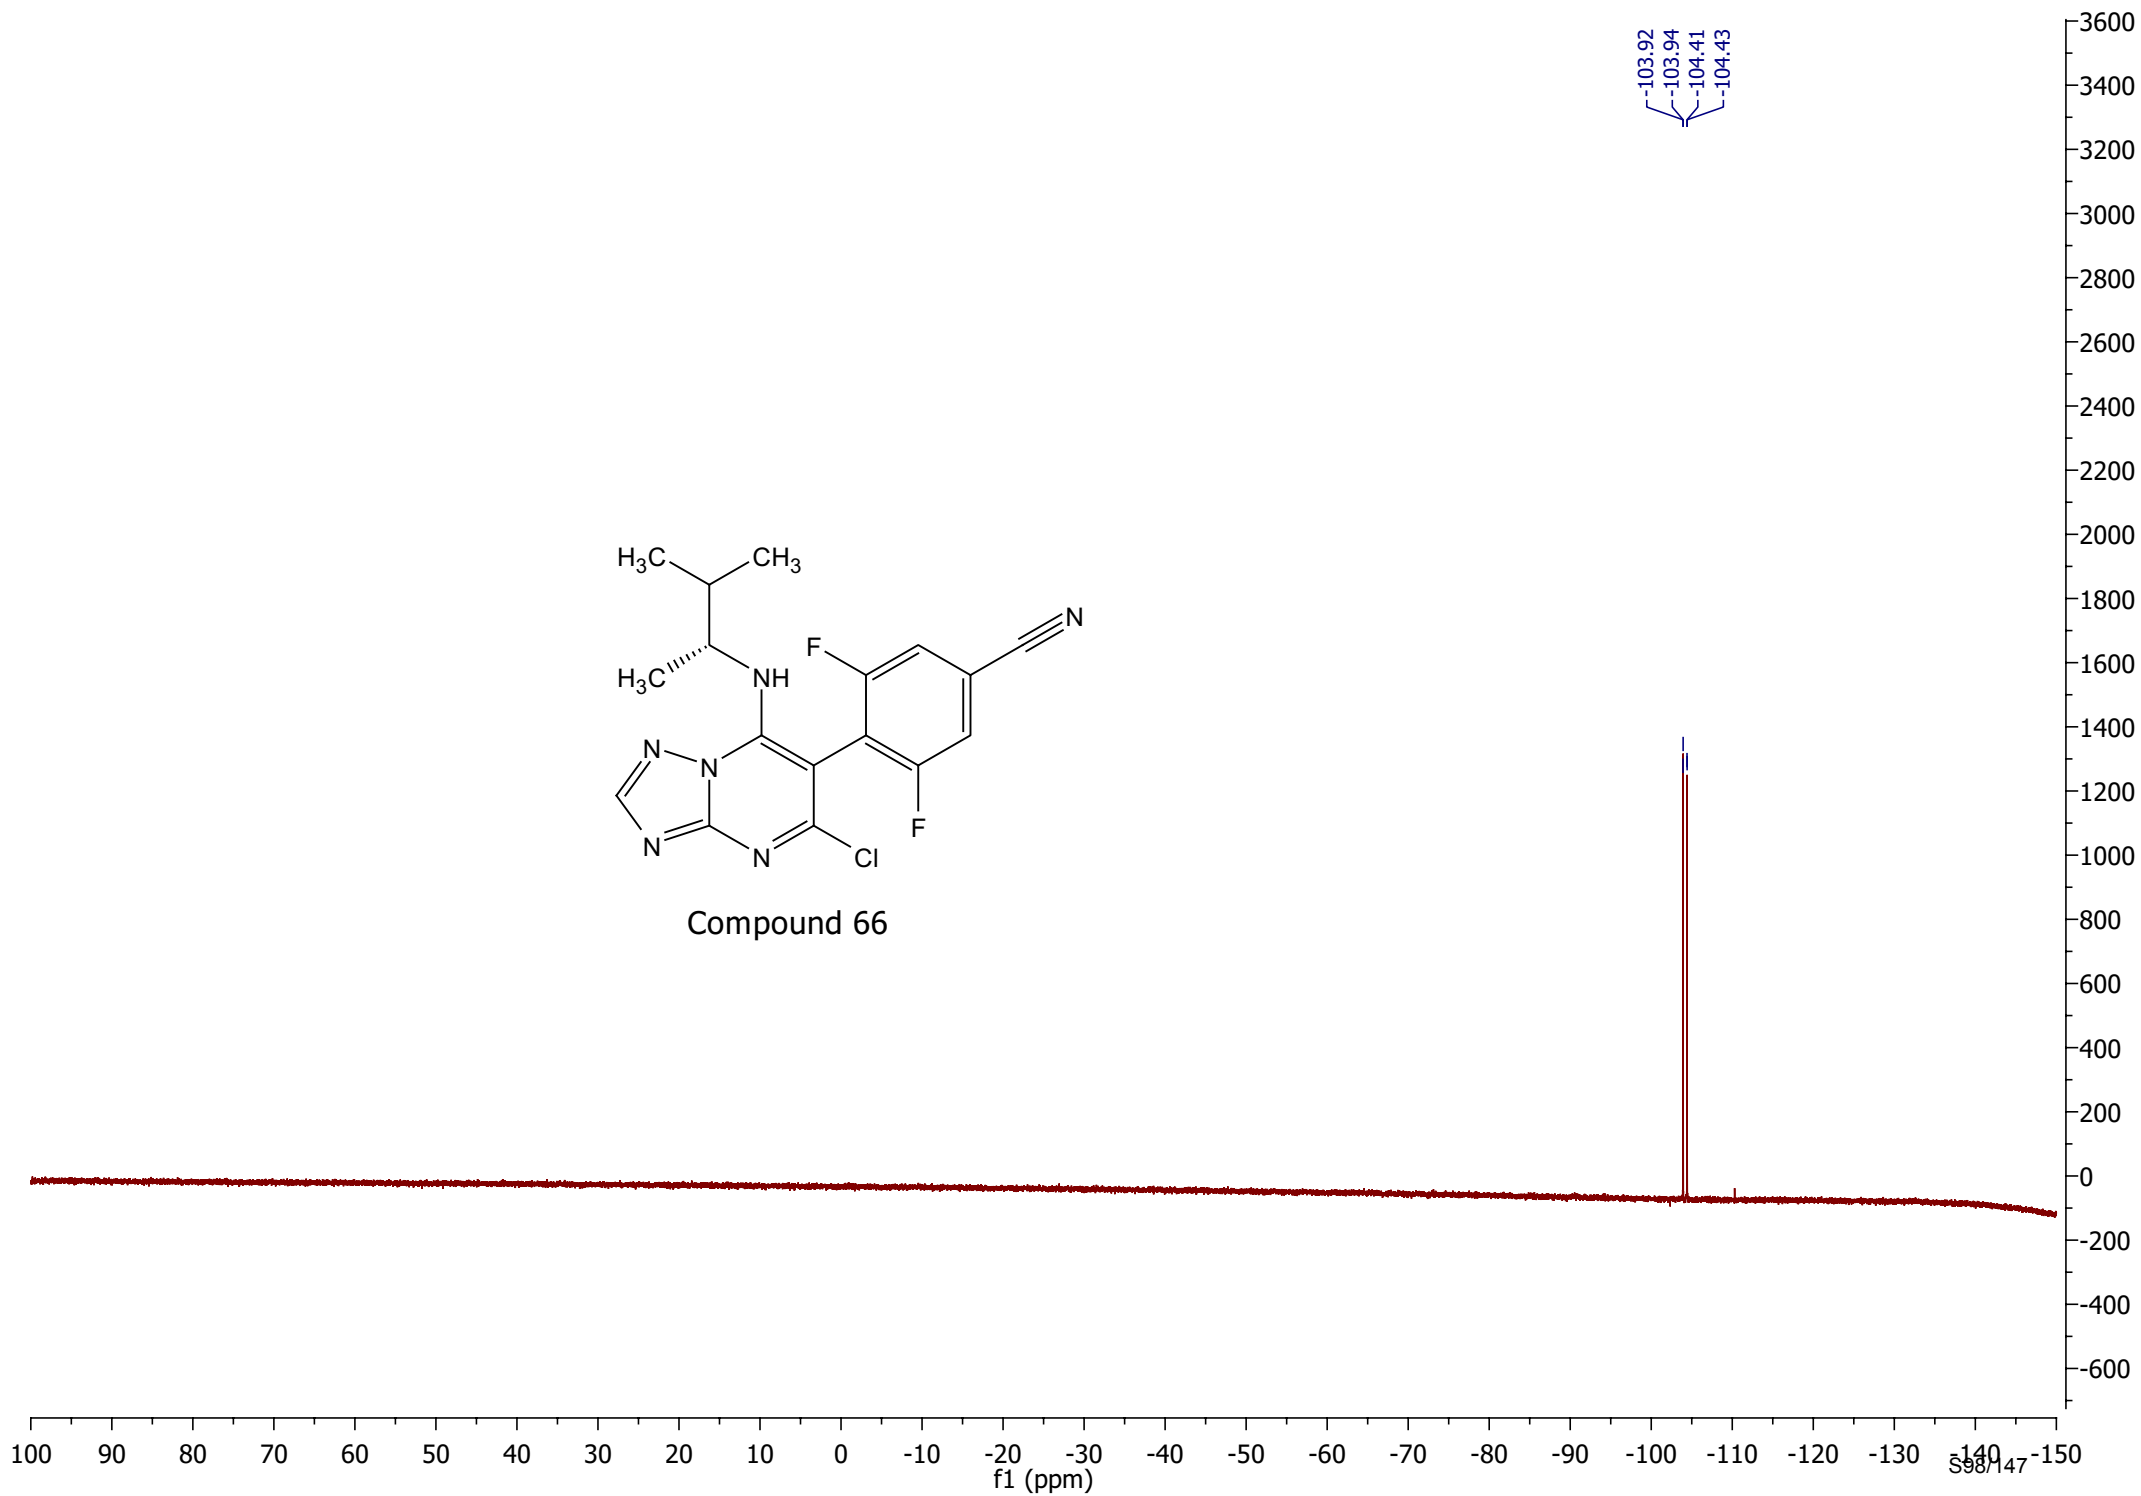

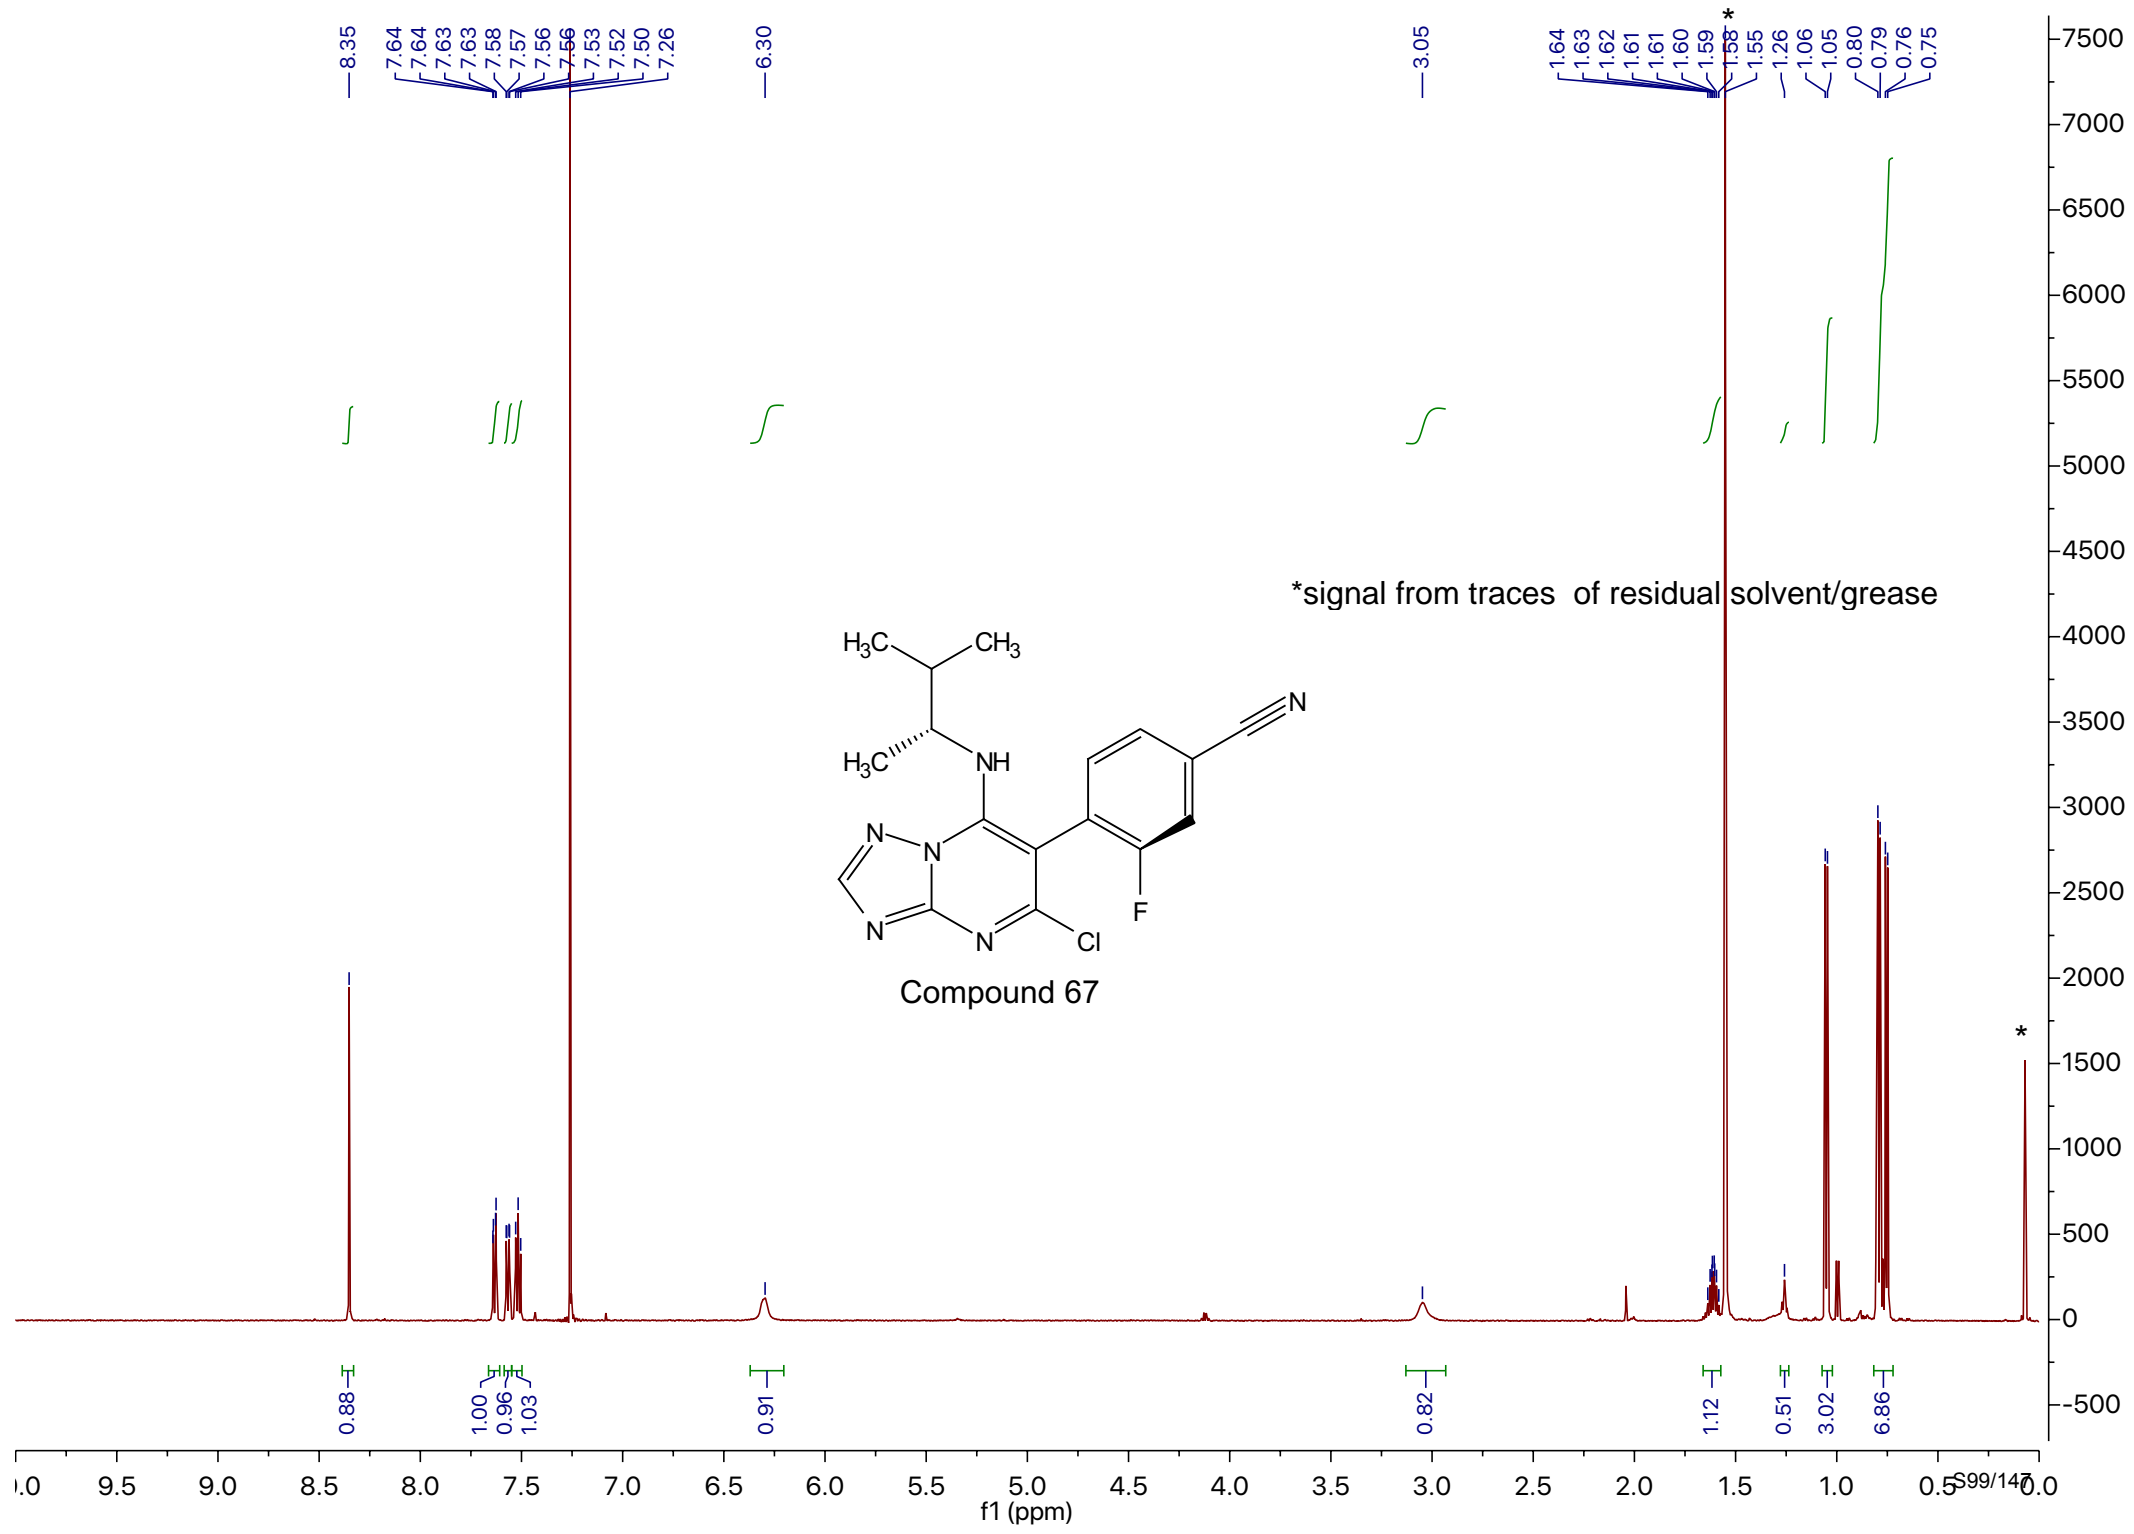

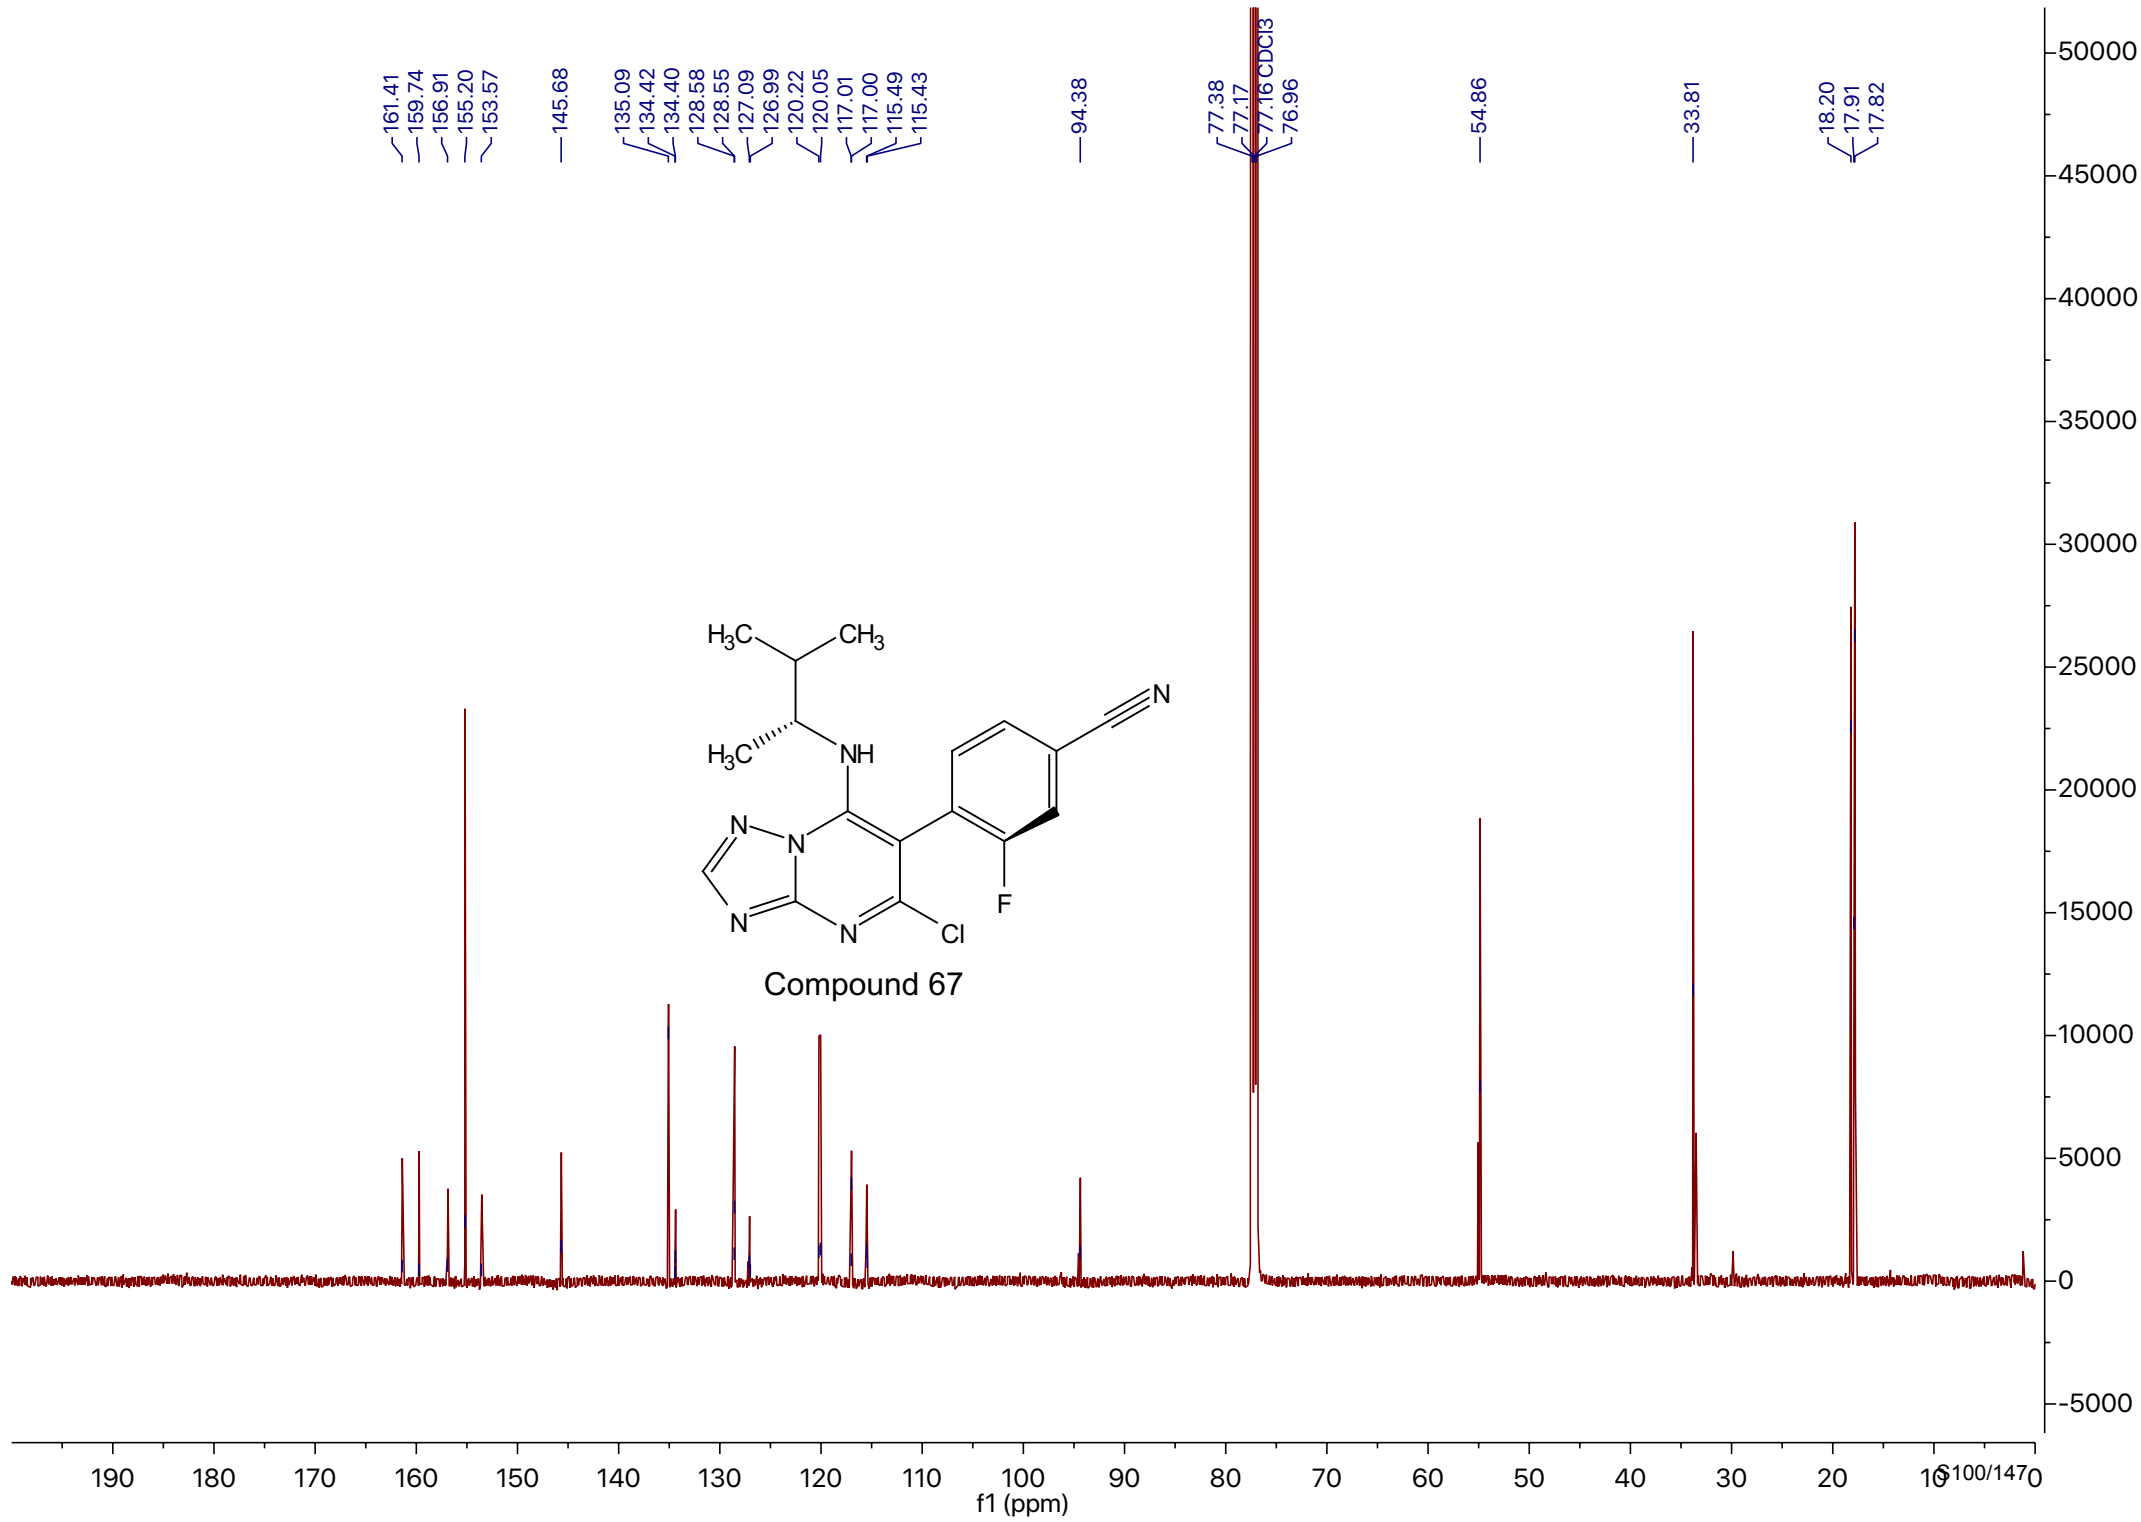

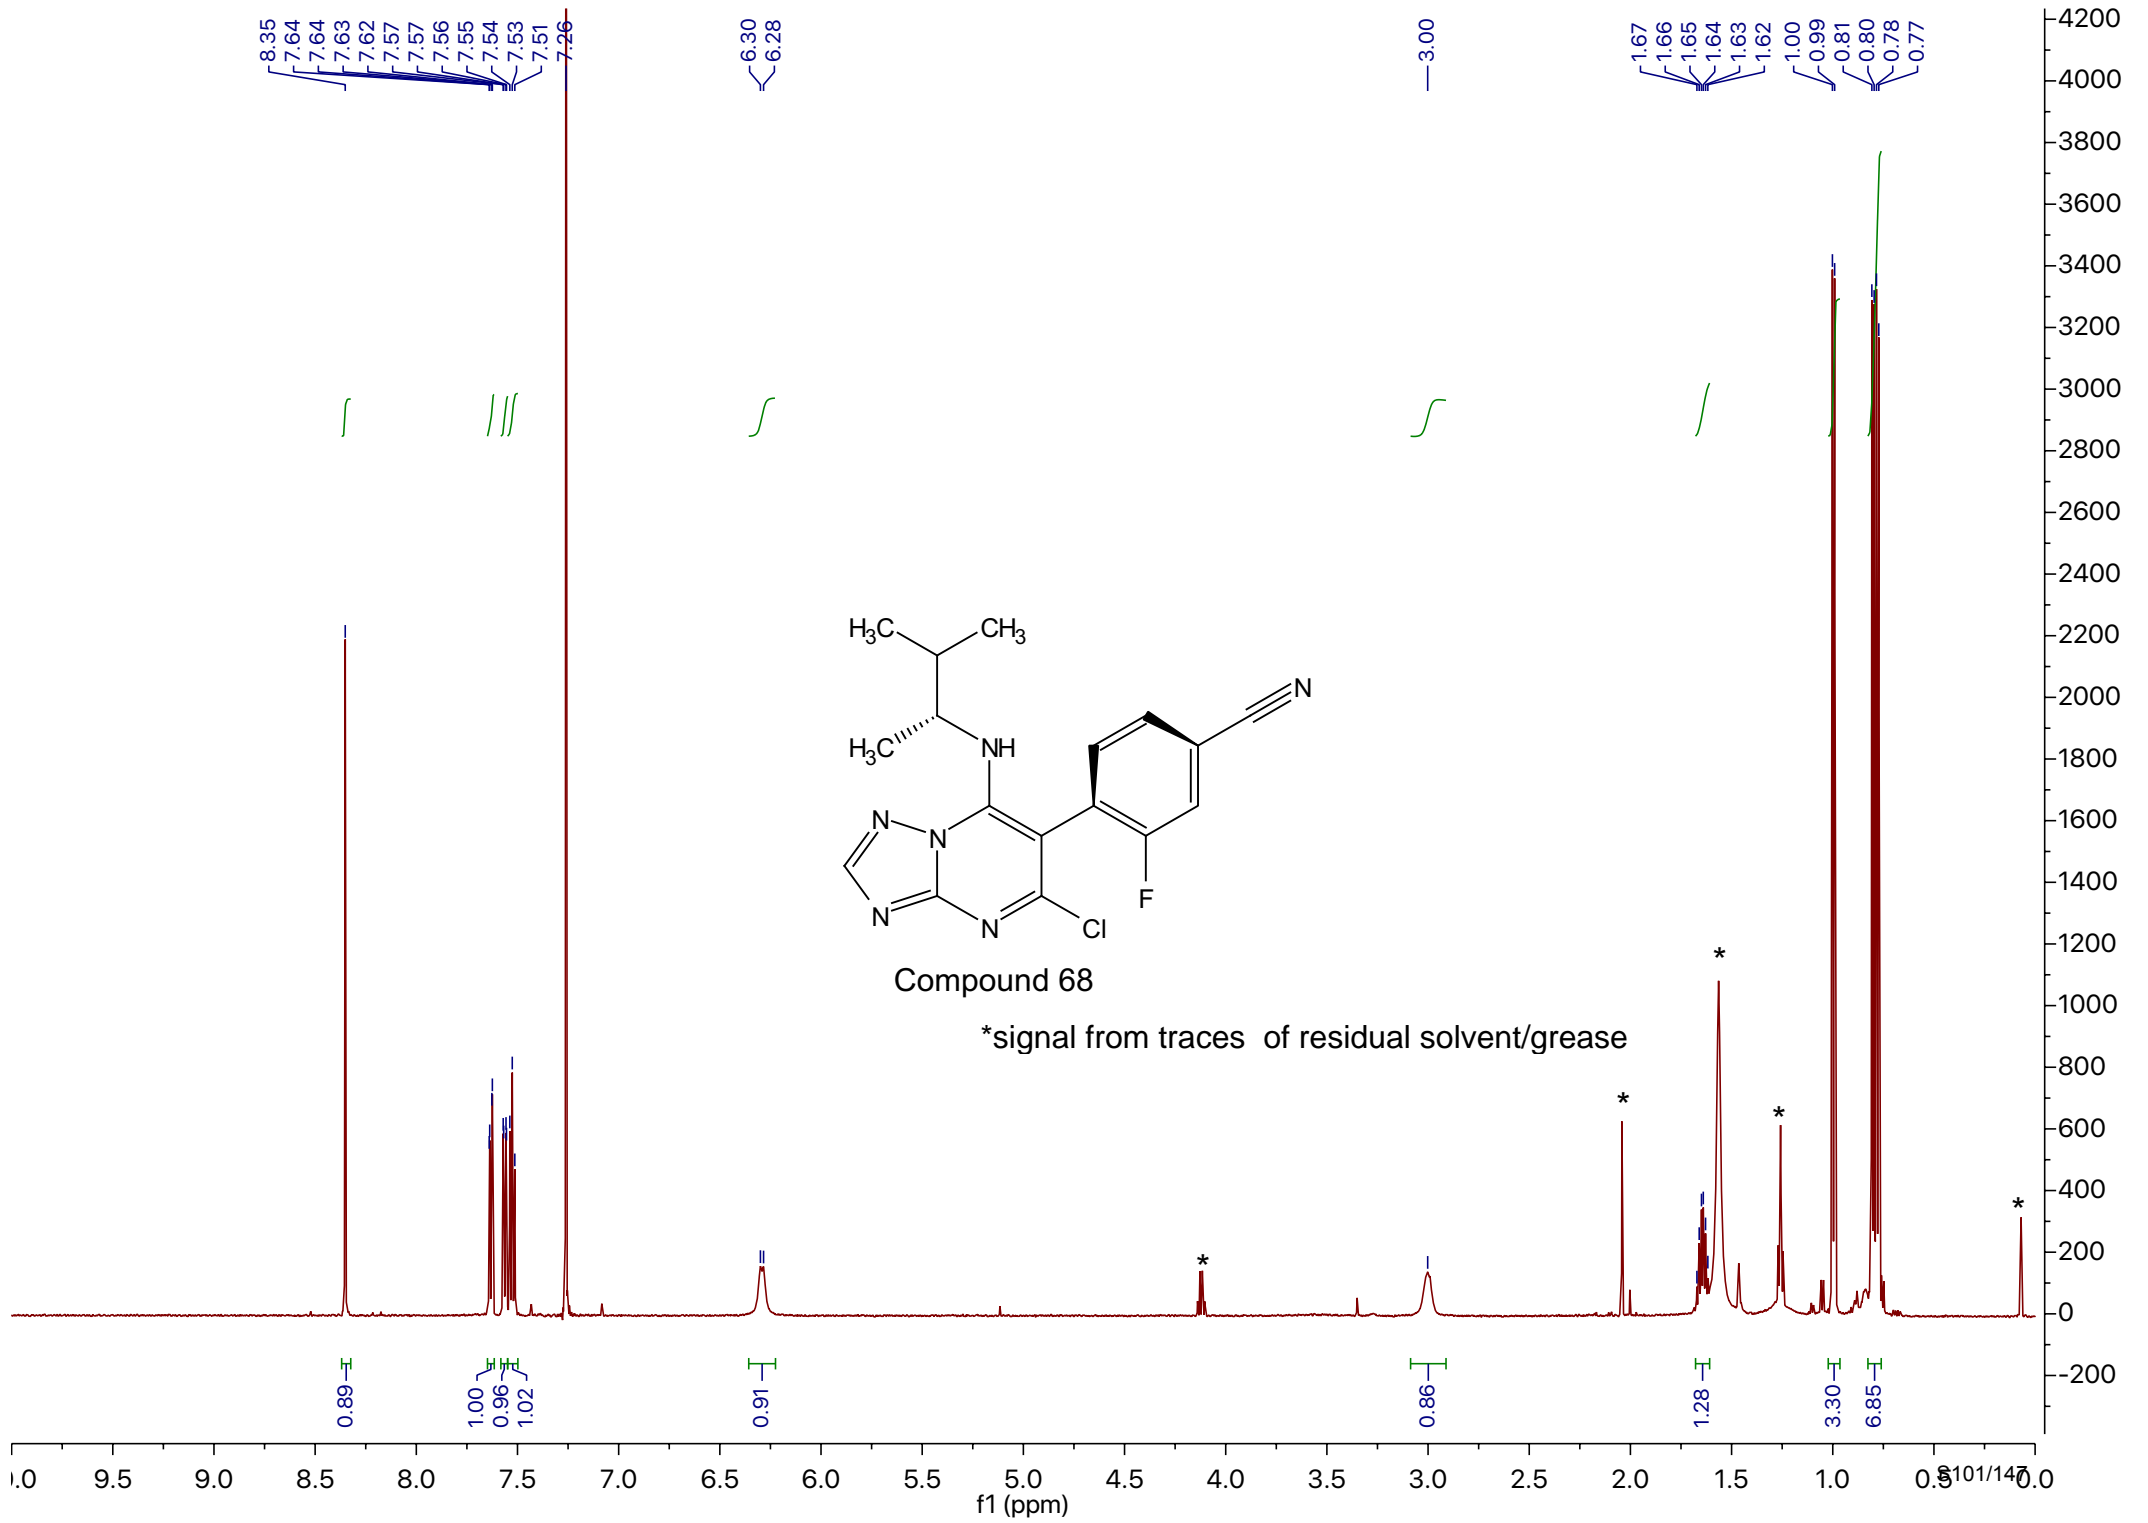

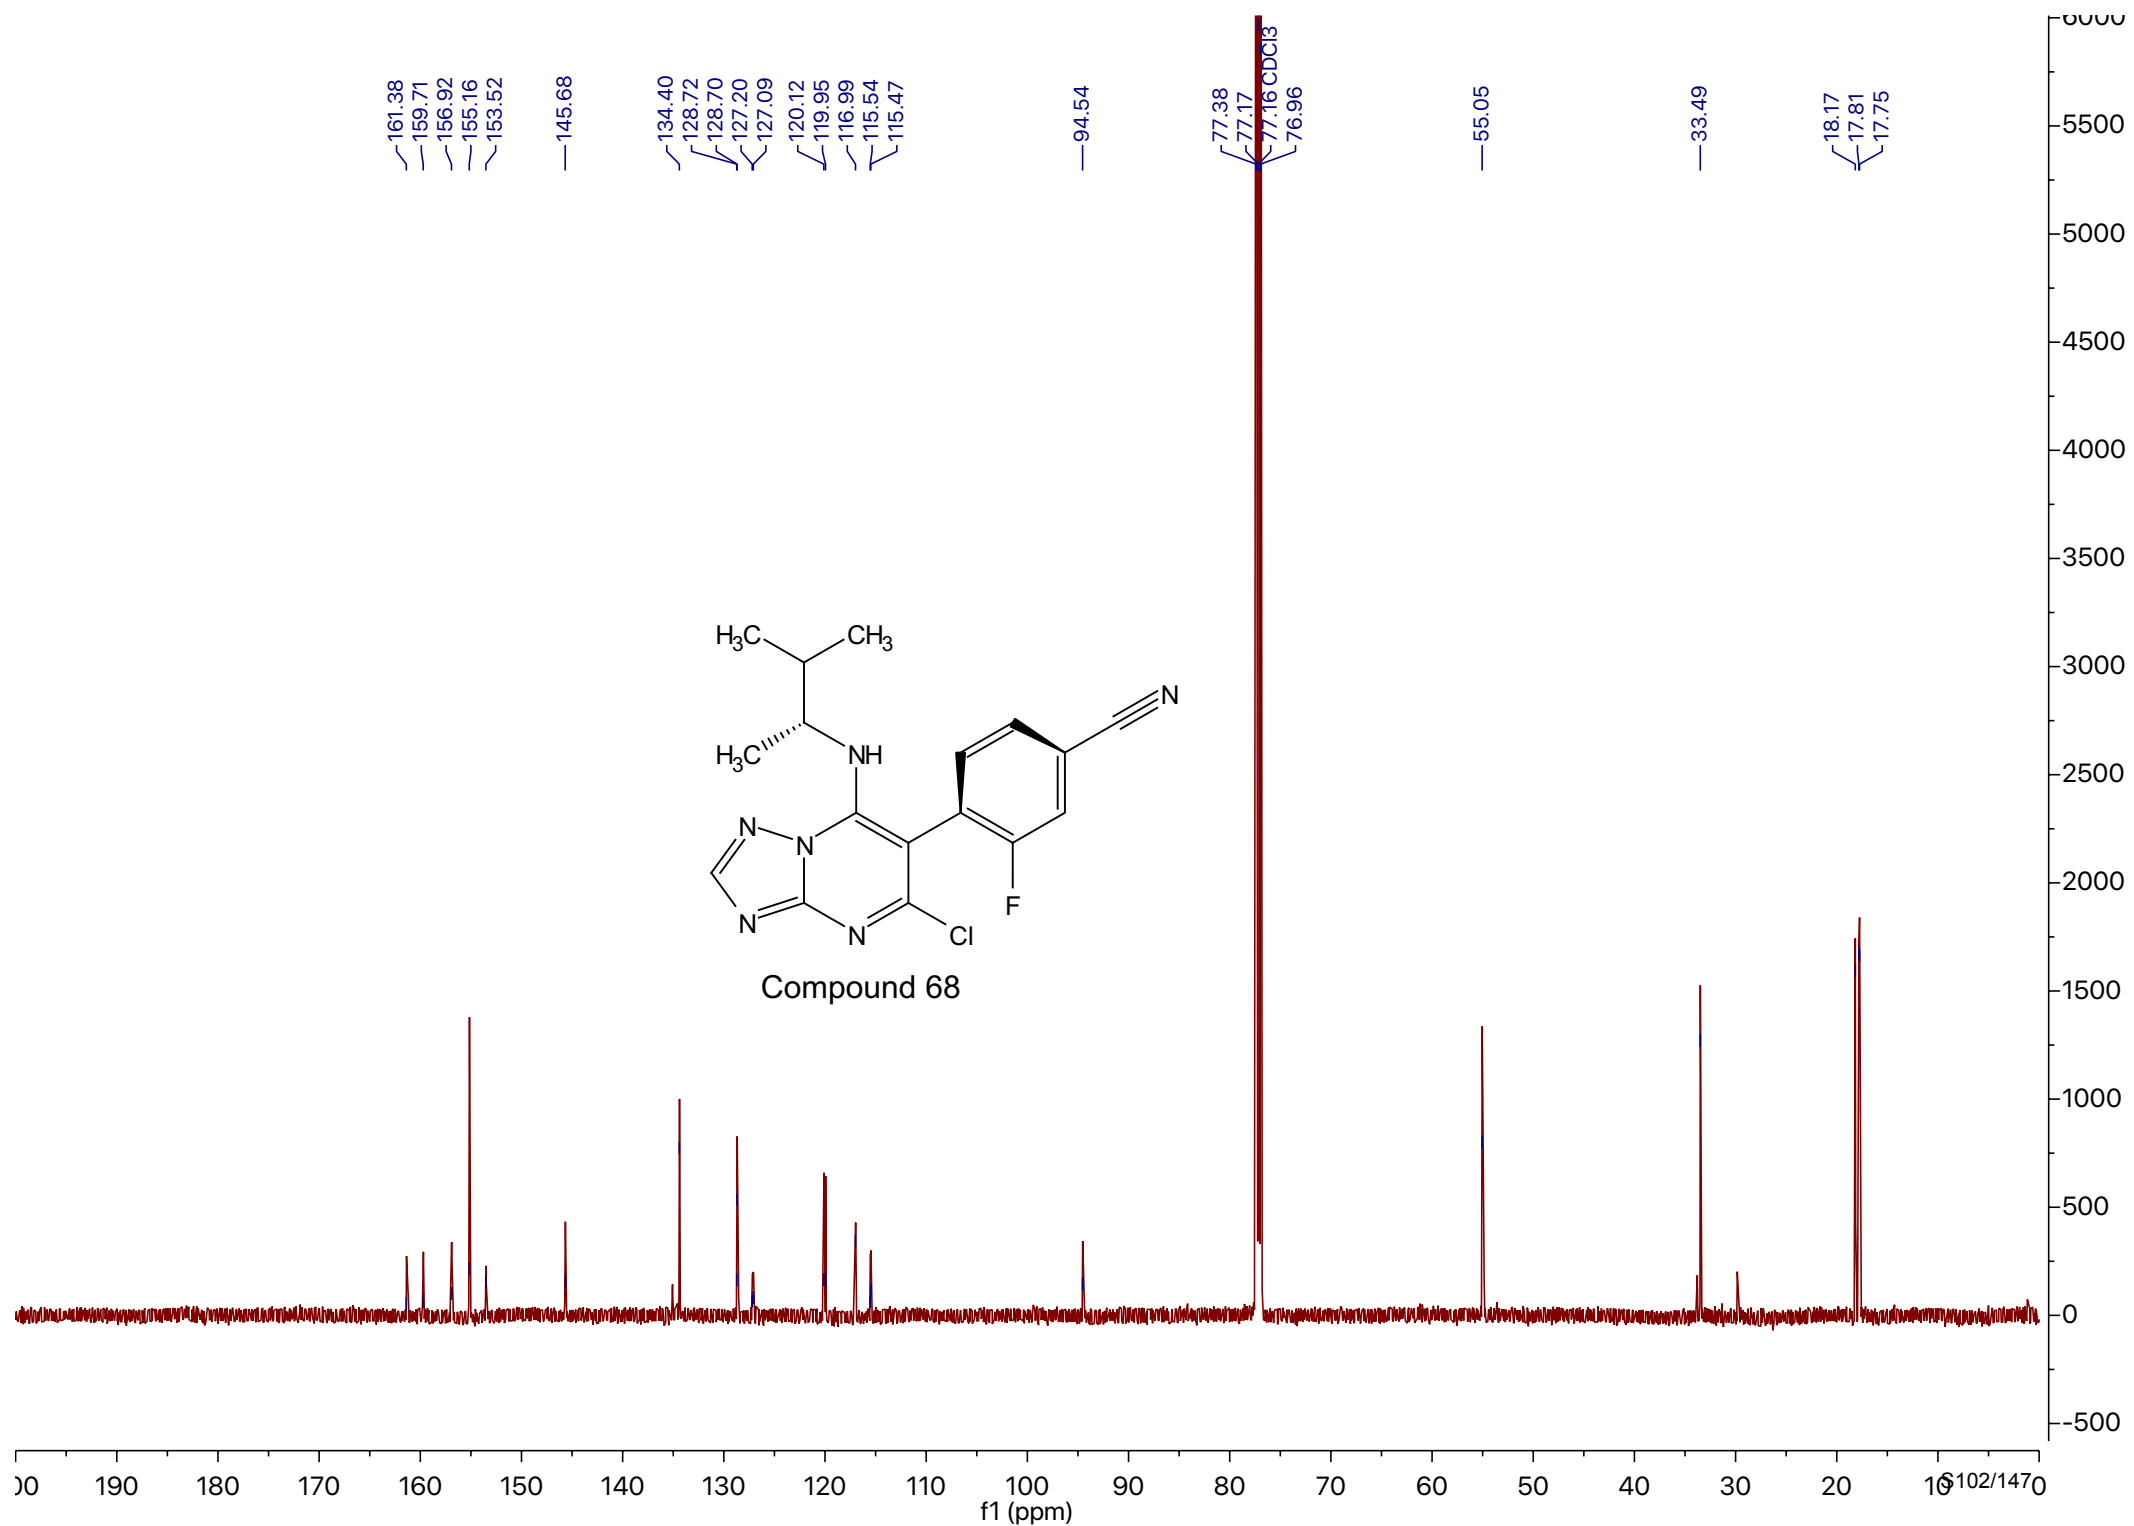

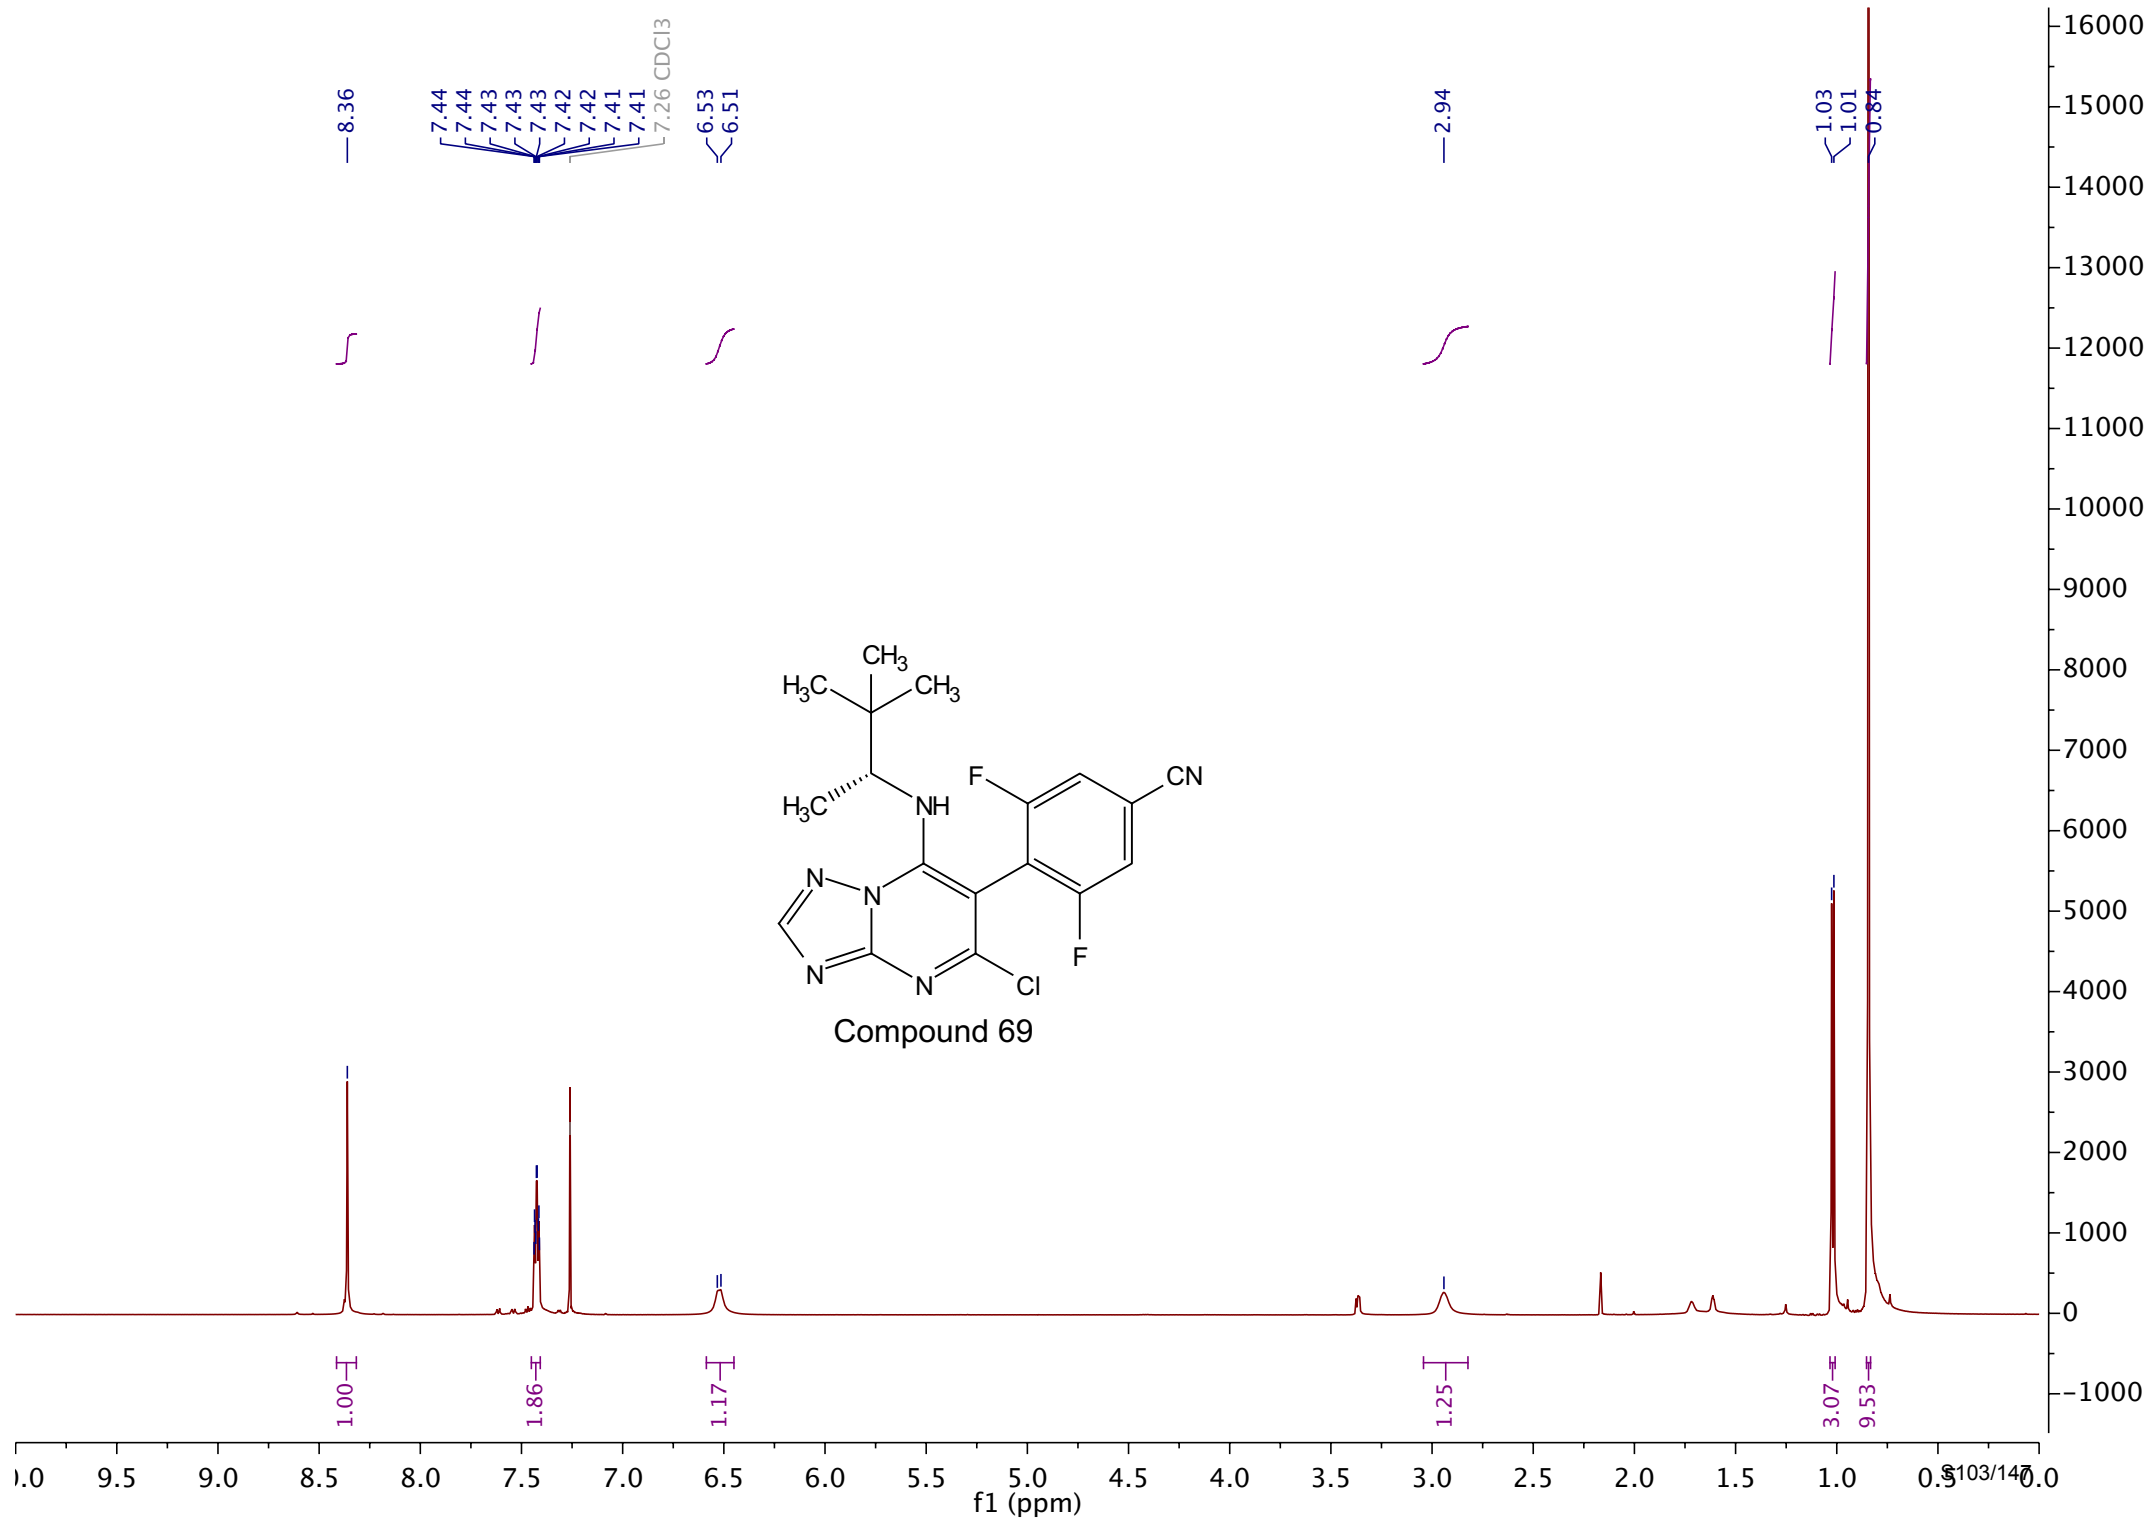



162.19  
162.15  
161.91  
161.87  
160.51  
160.47  
160.23  
160.19  
157.12  
155.22  
146.03

116.24  
116.21  
116.07  
116.04  
116.02  
116.02  
115.88  
115.85

87.69

77.16  
77.16  
77.16

58.57

34.93

25.86

16.56

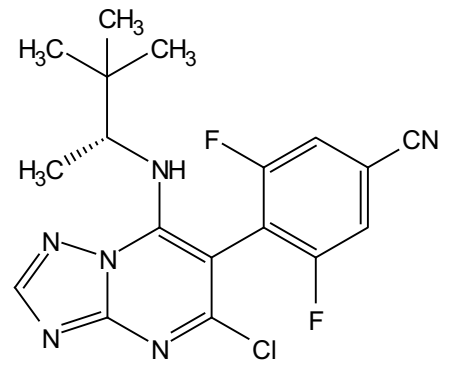

Compound 69

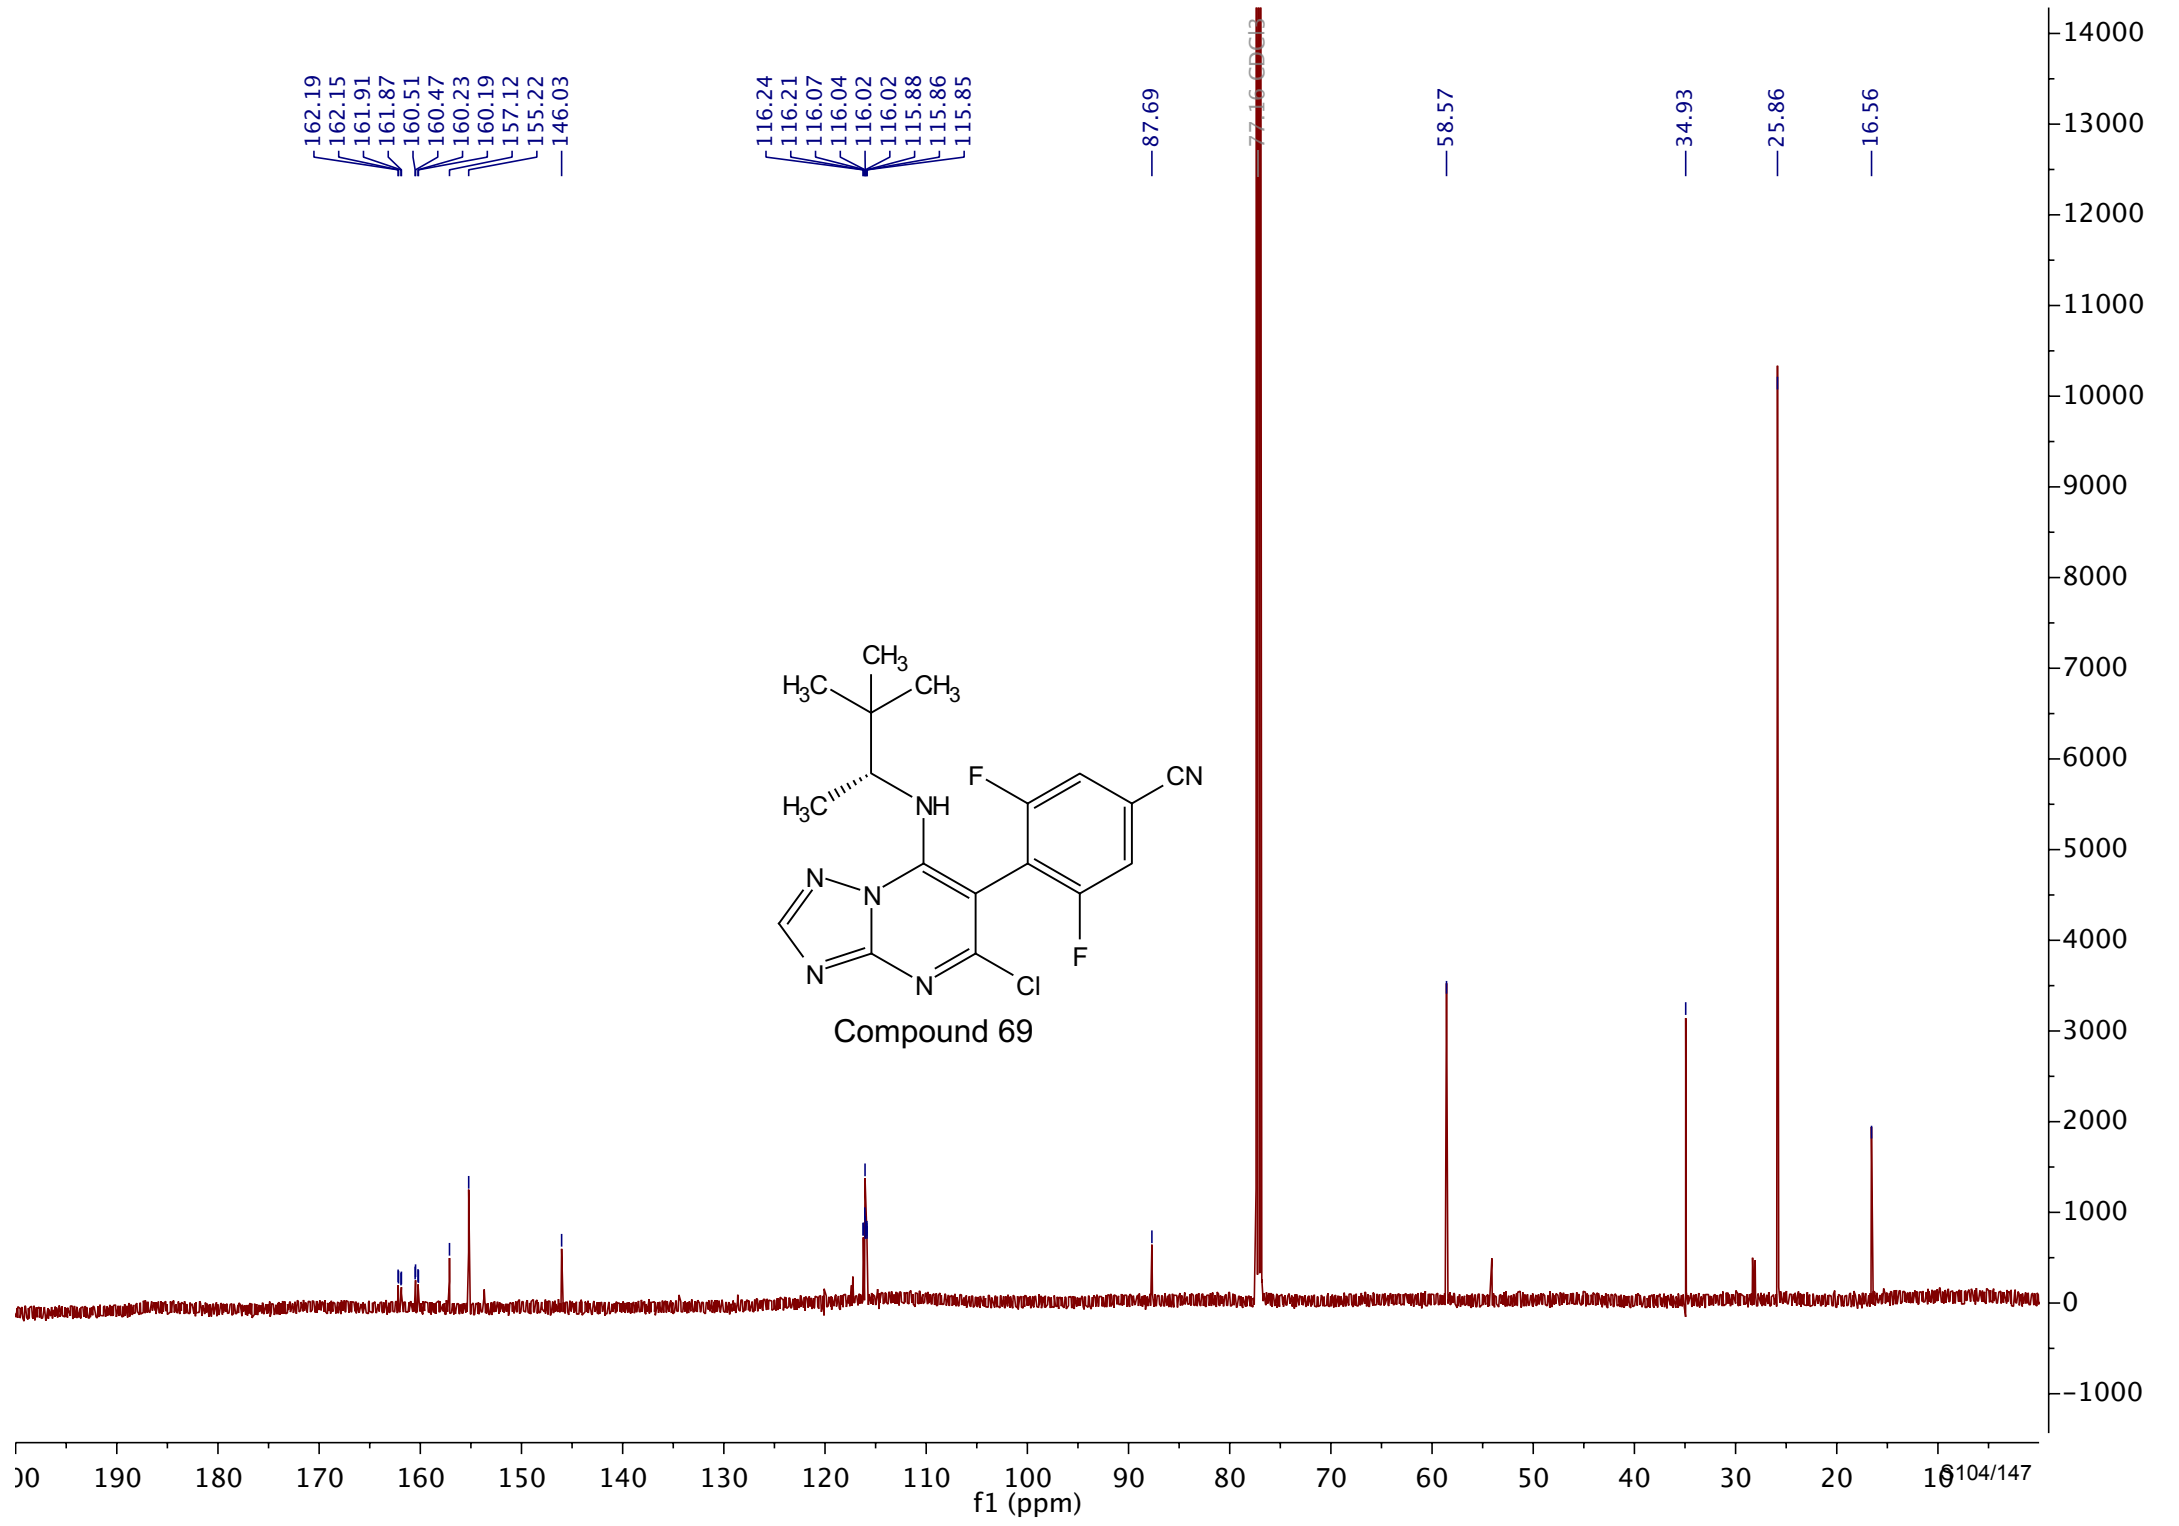

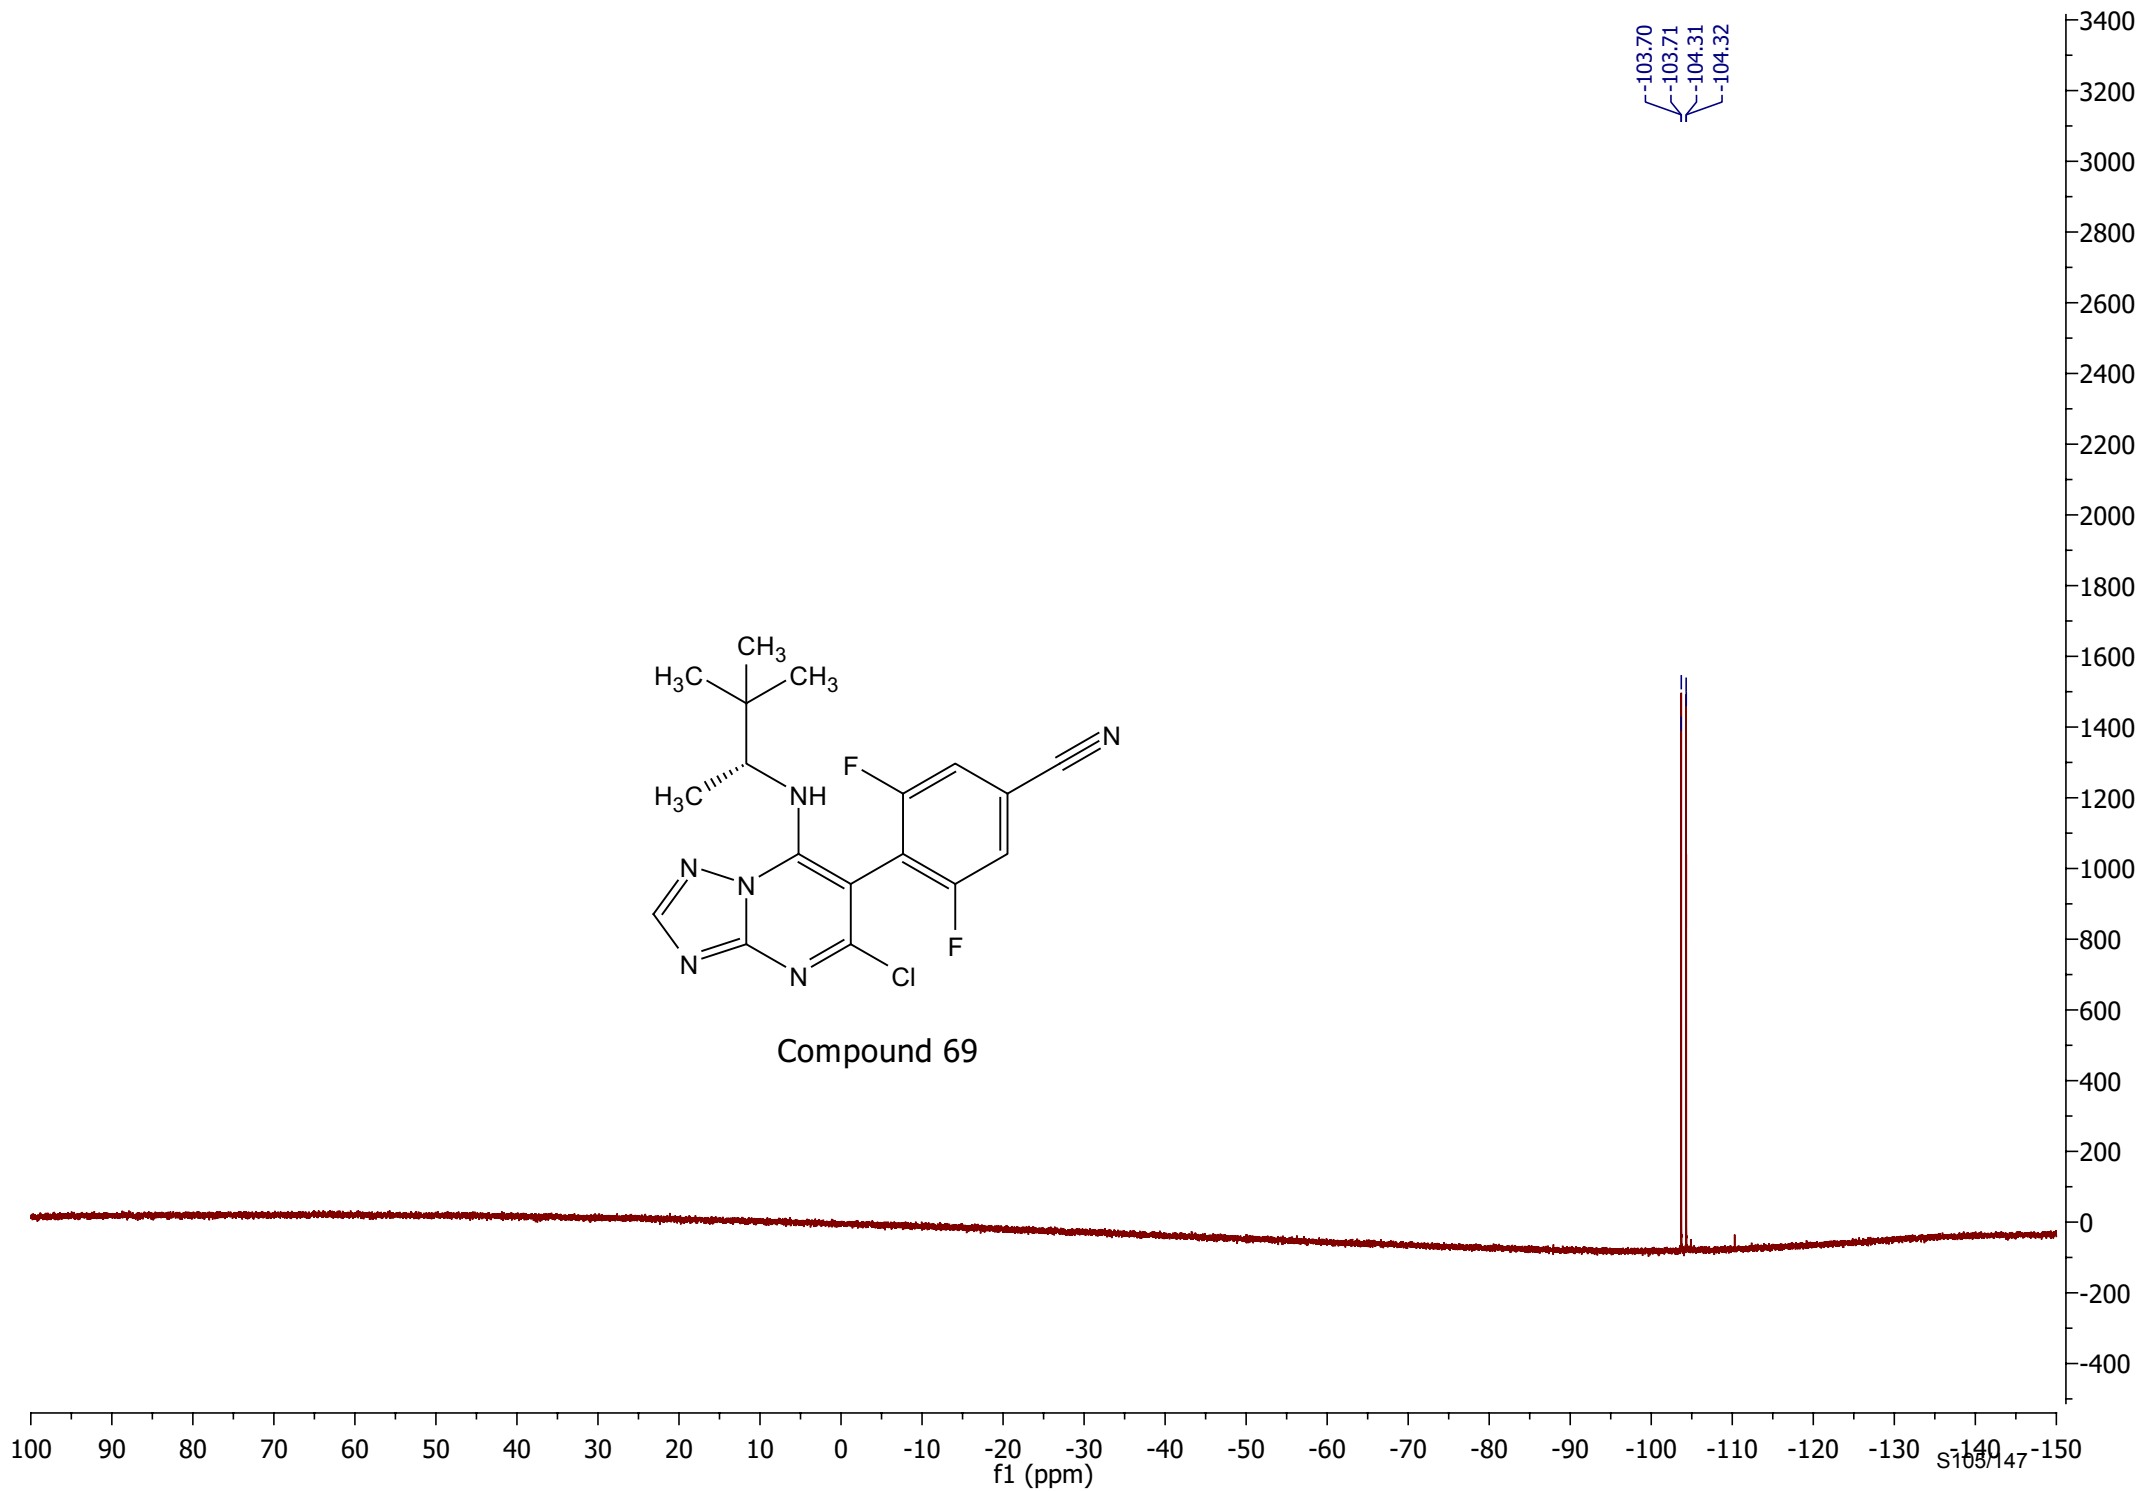

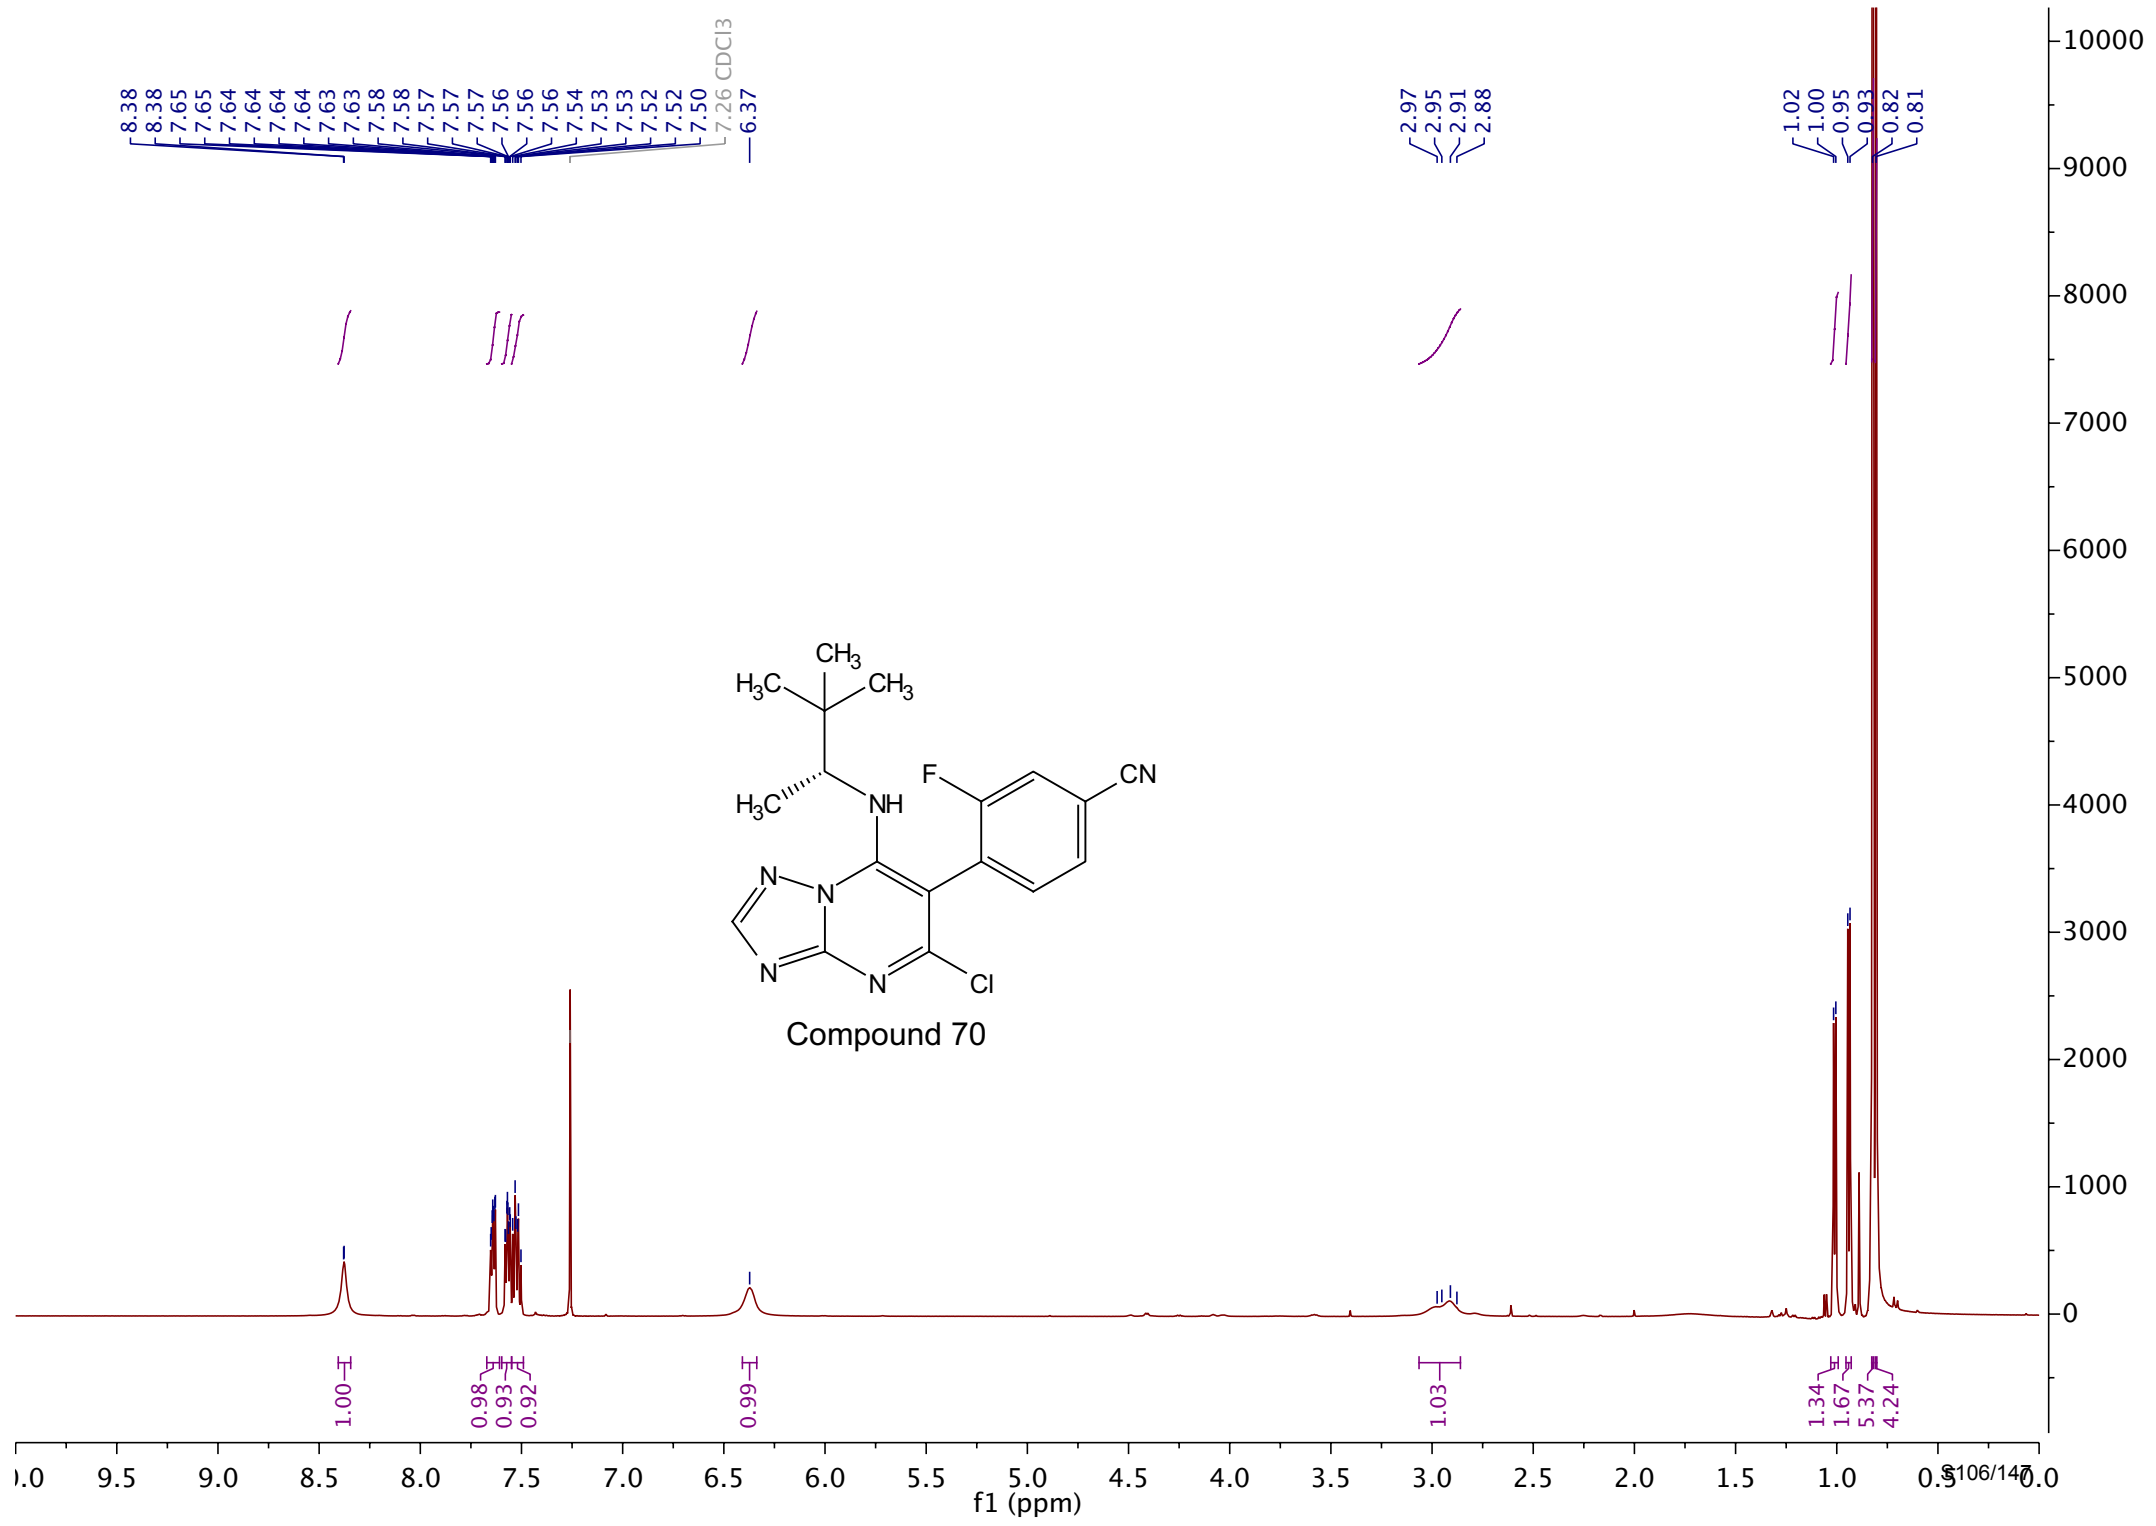

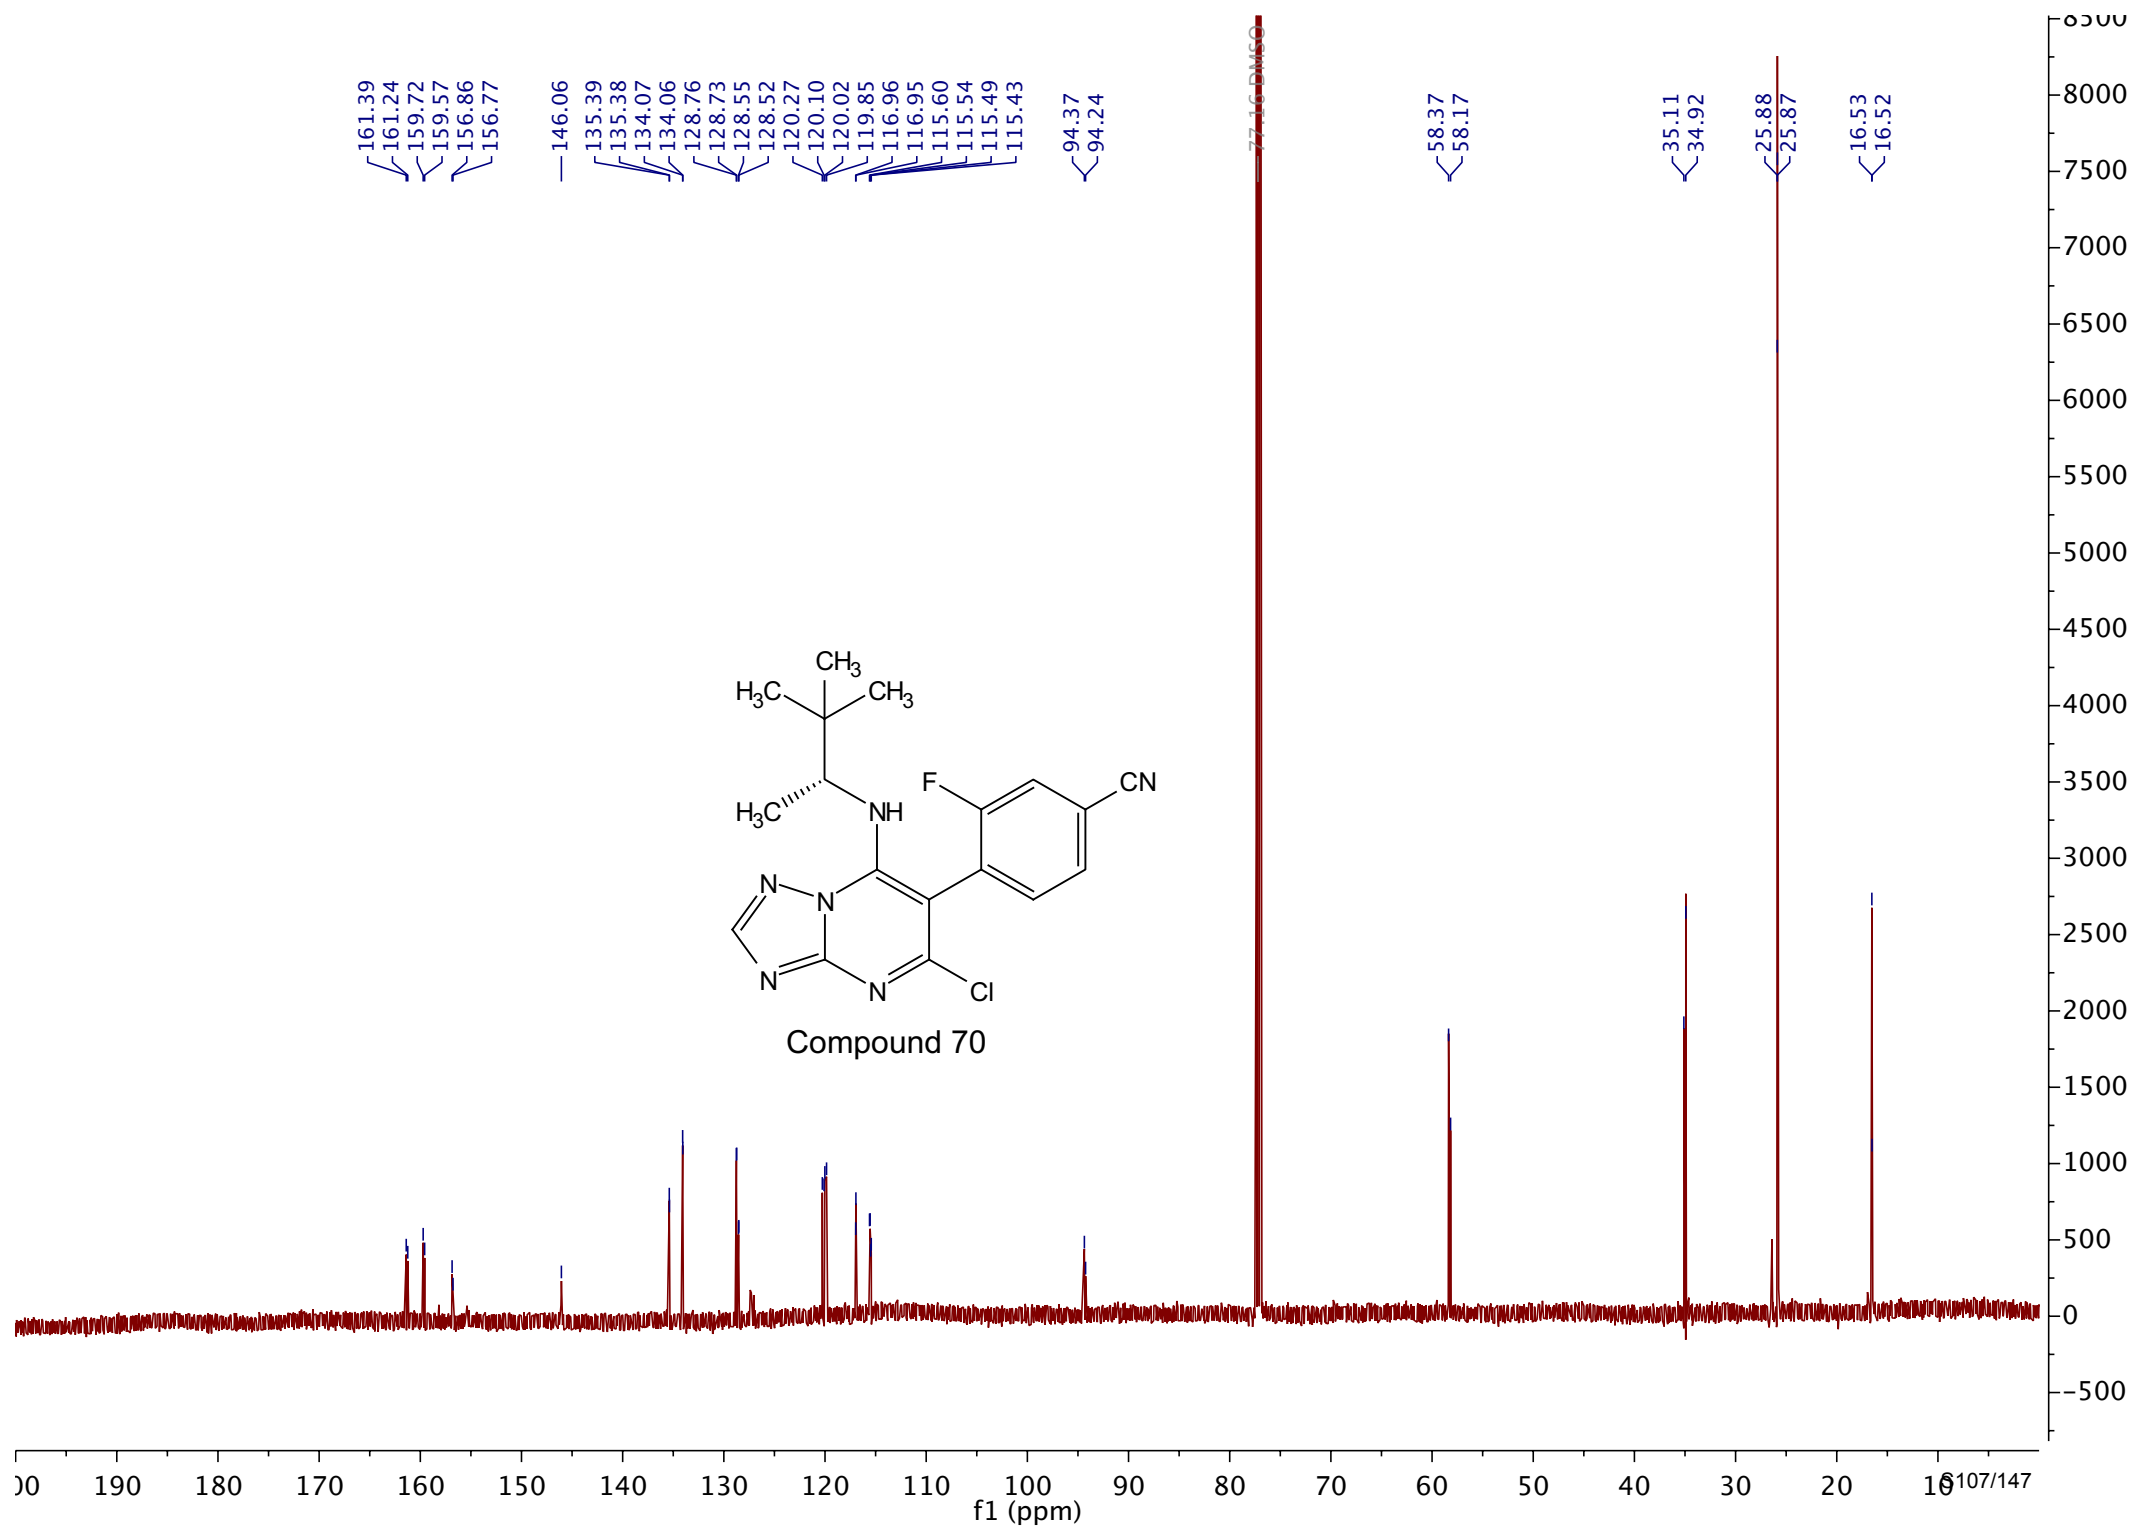

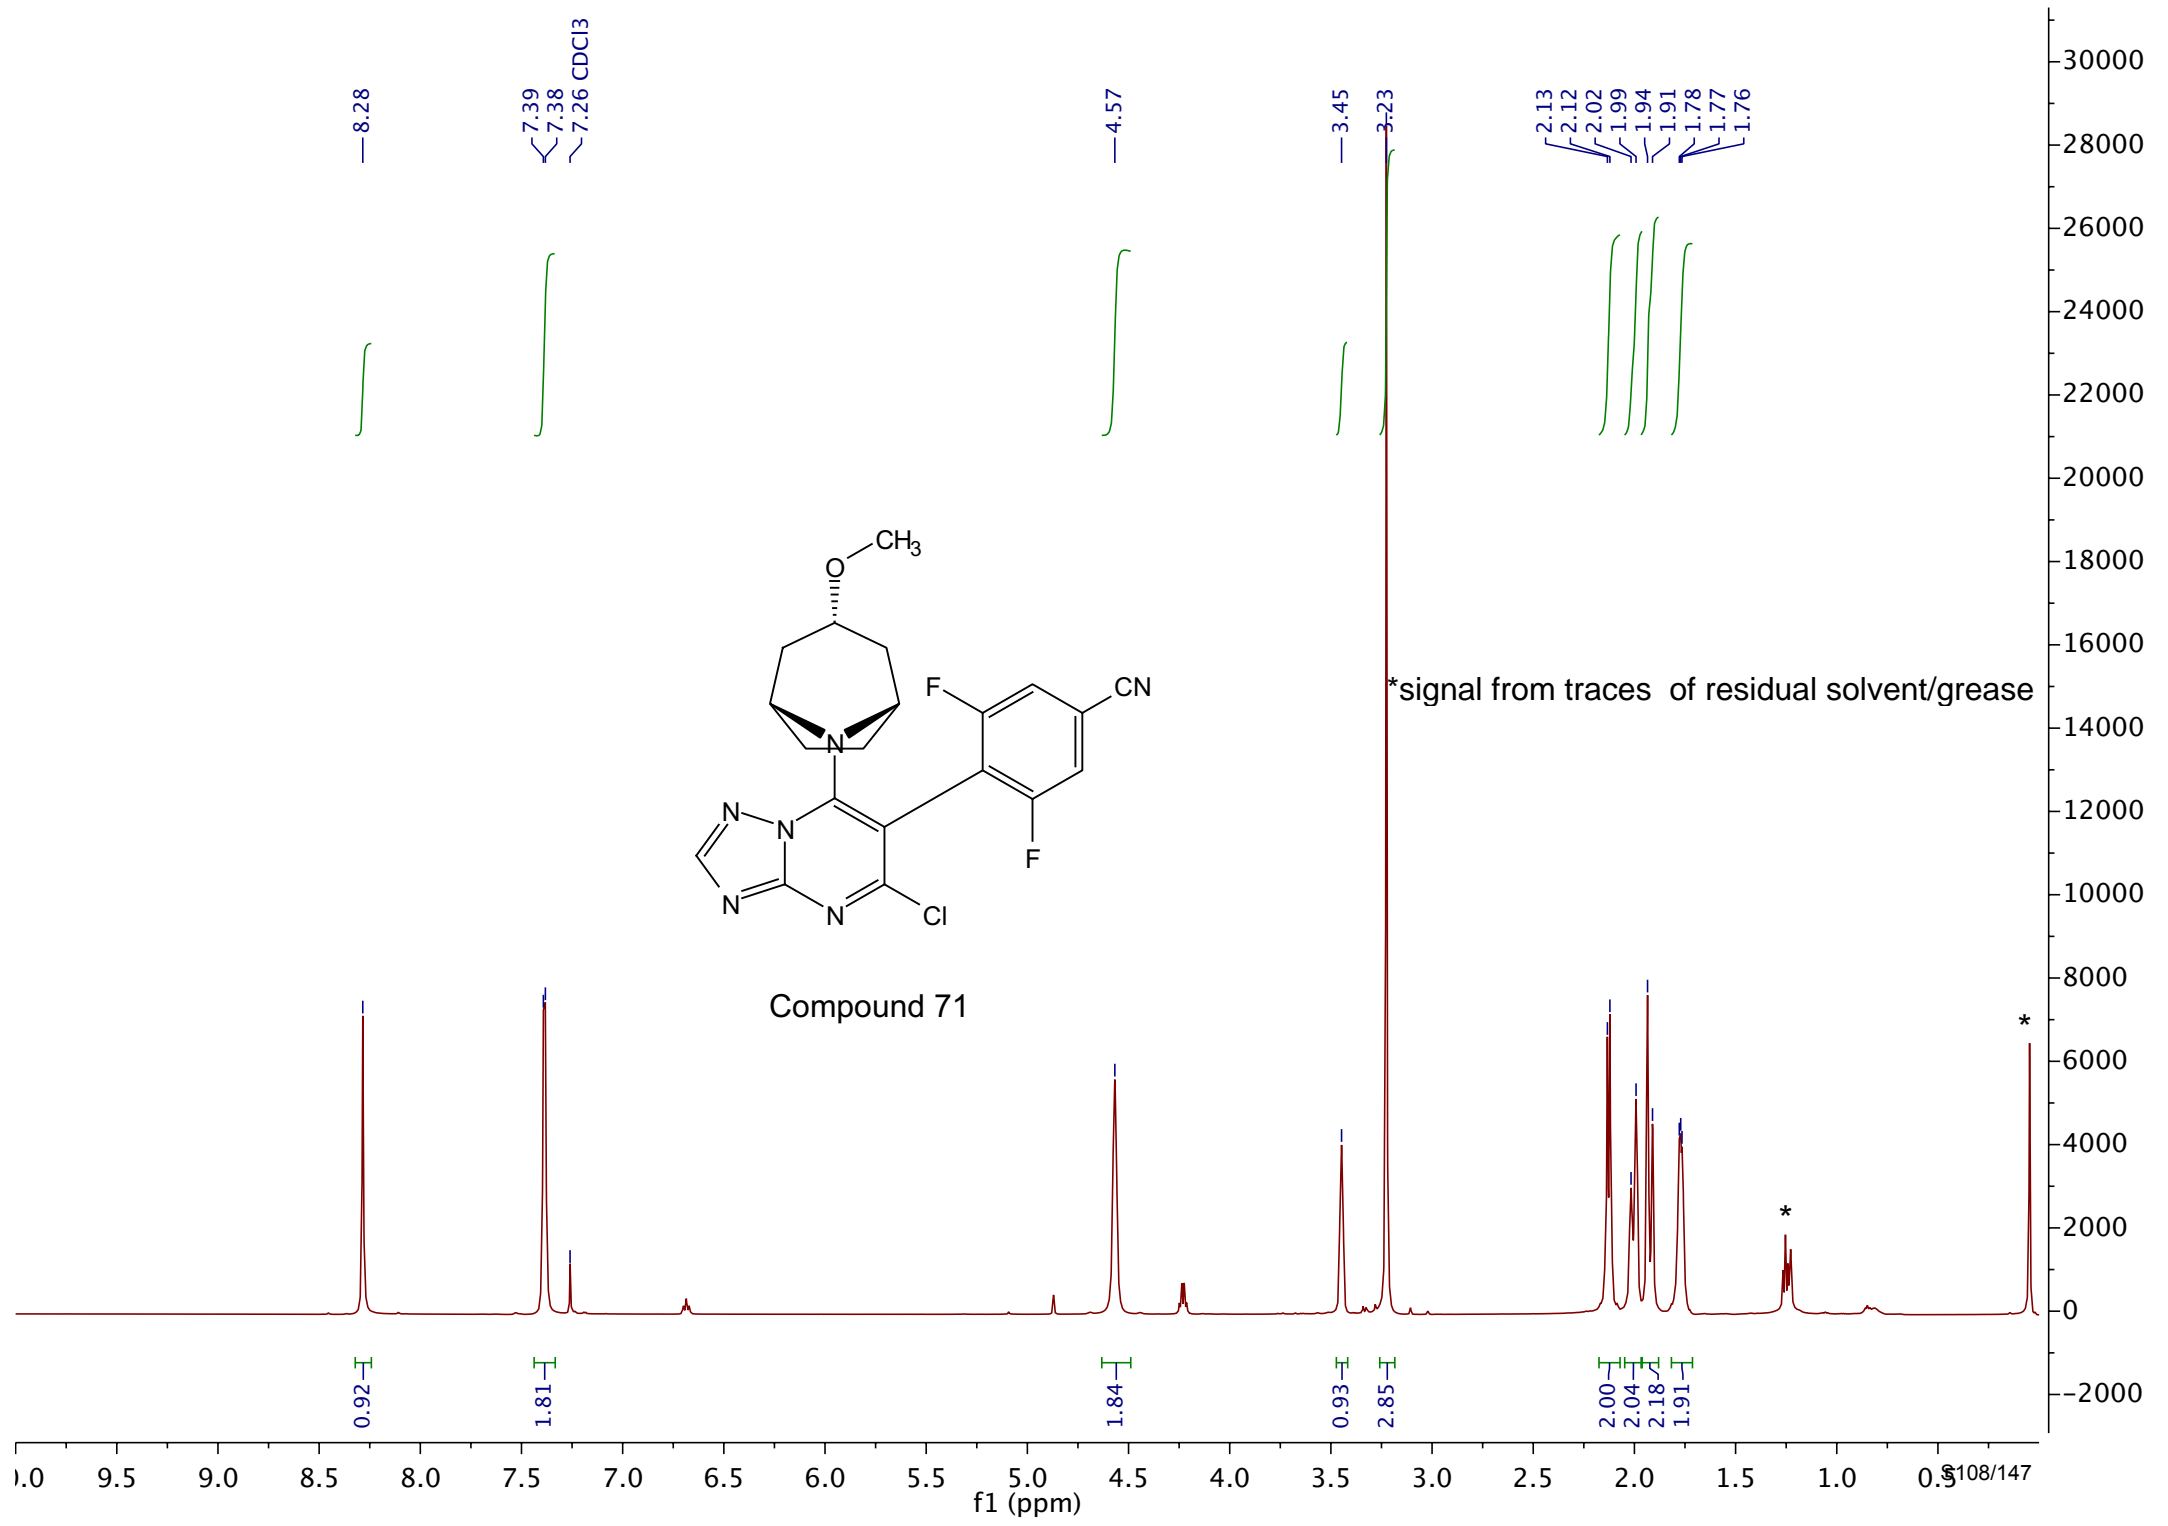

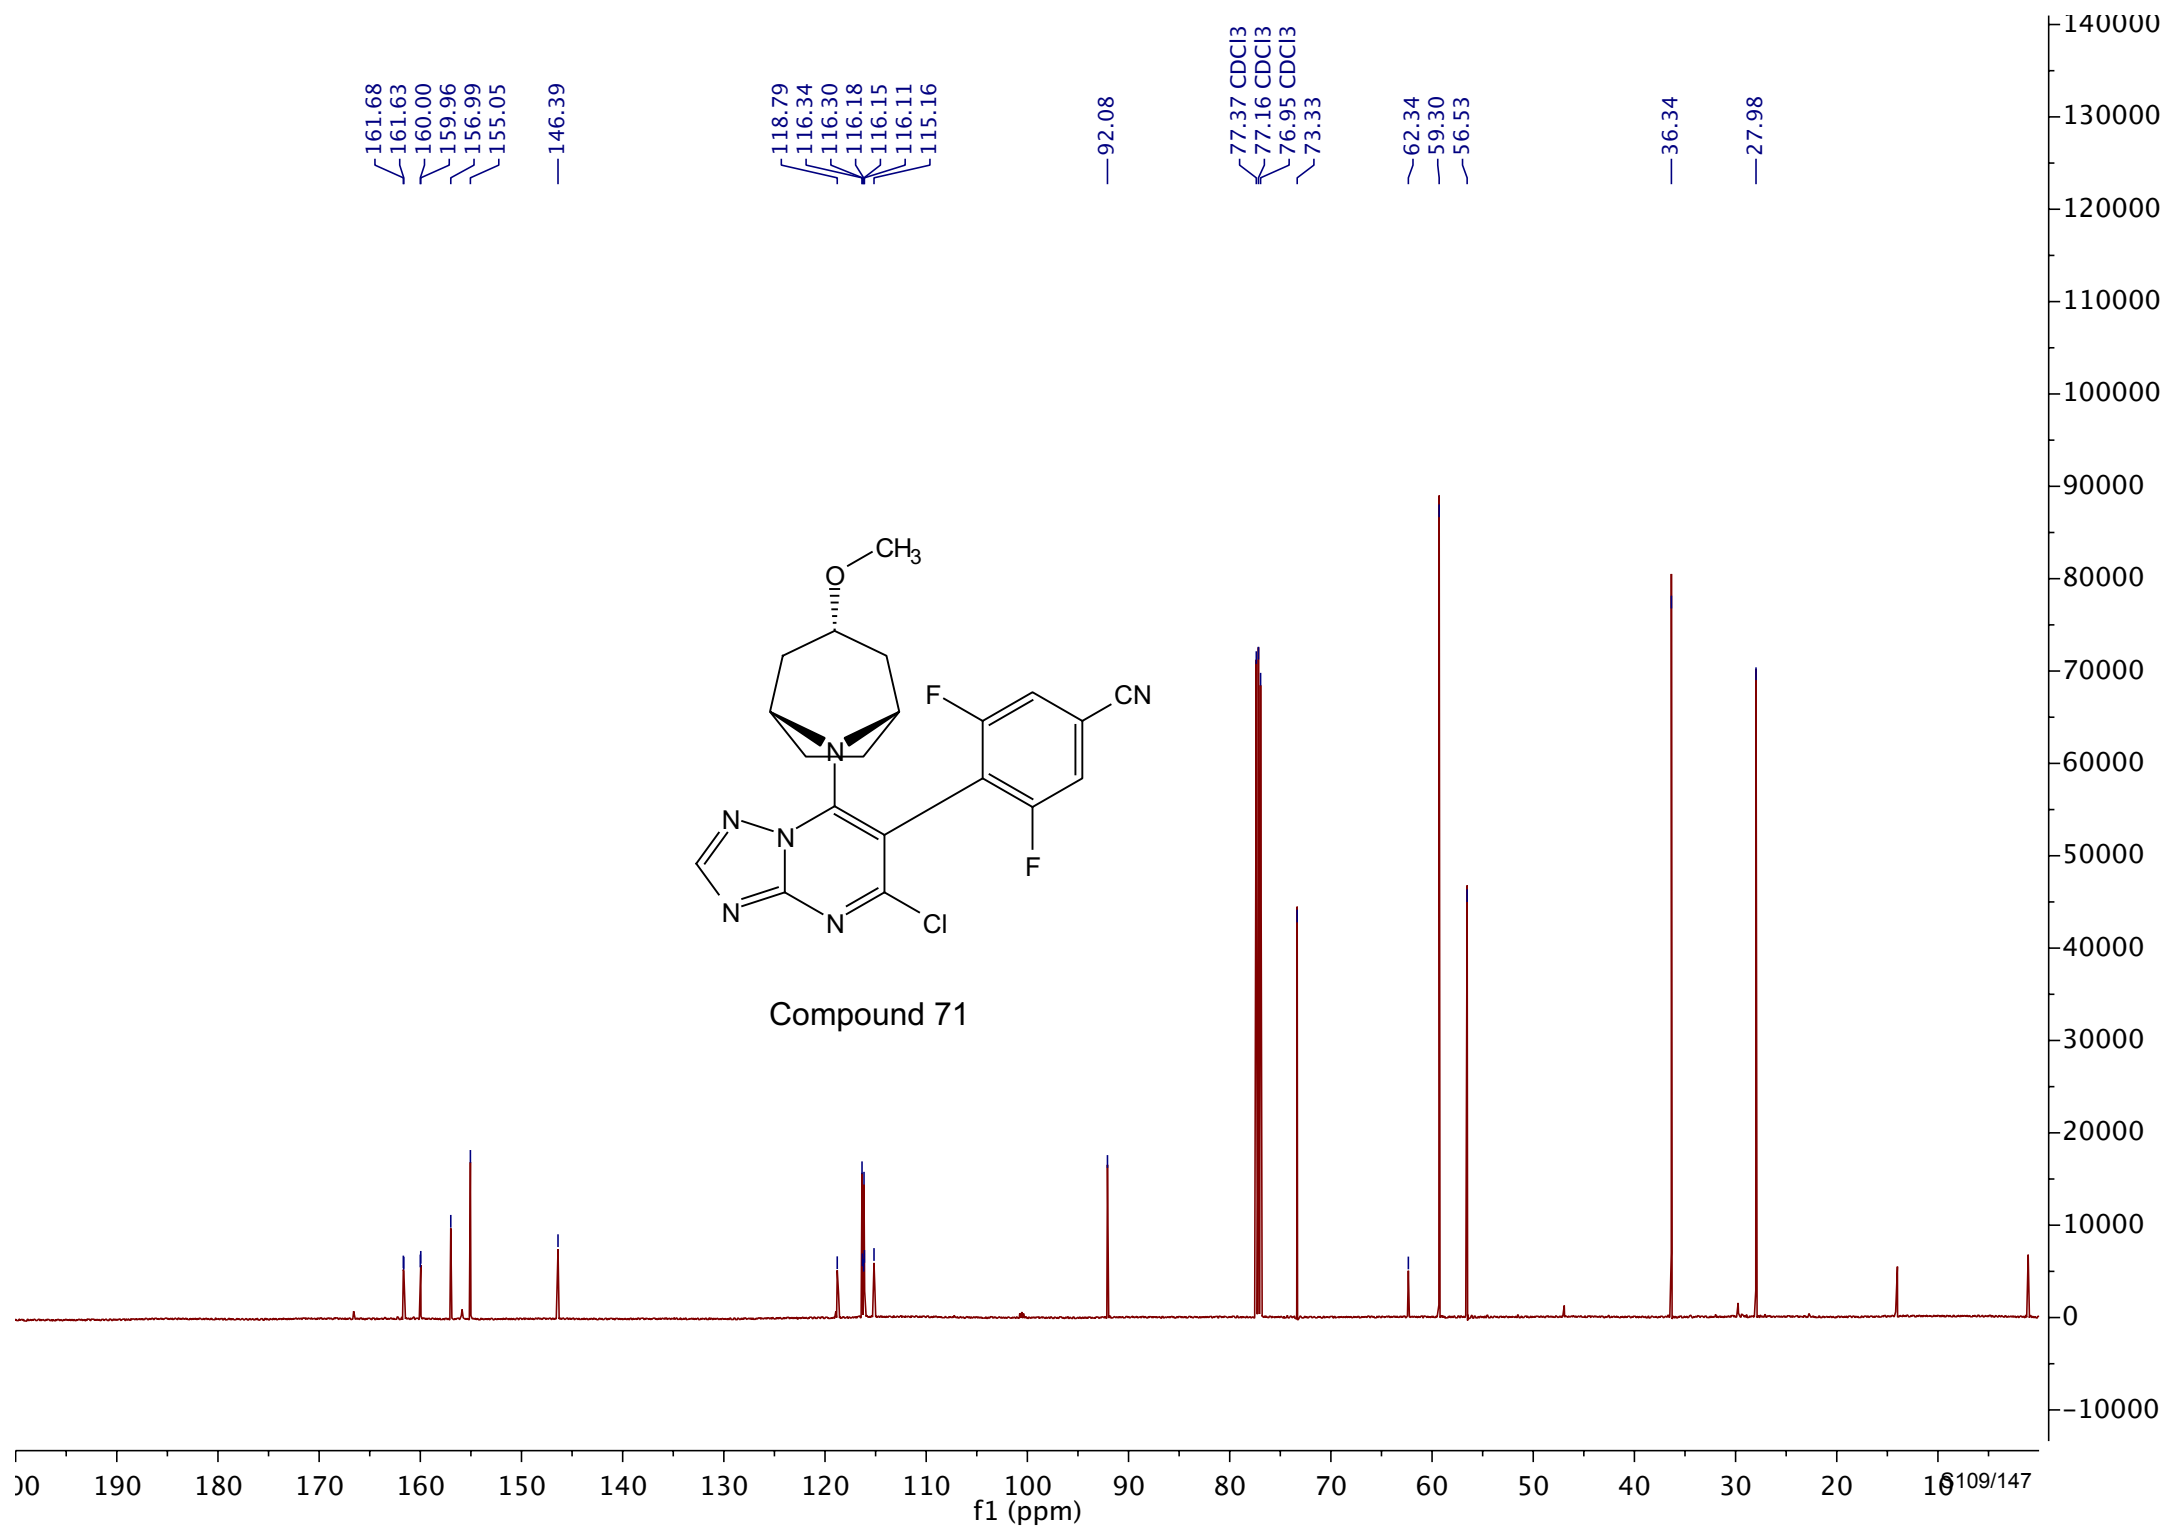

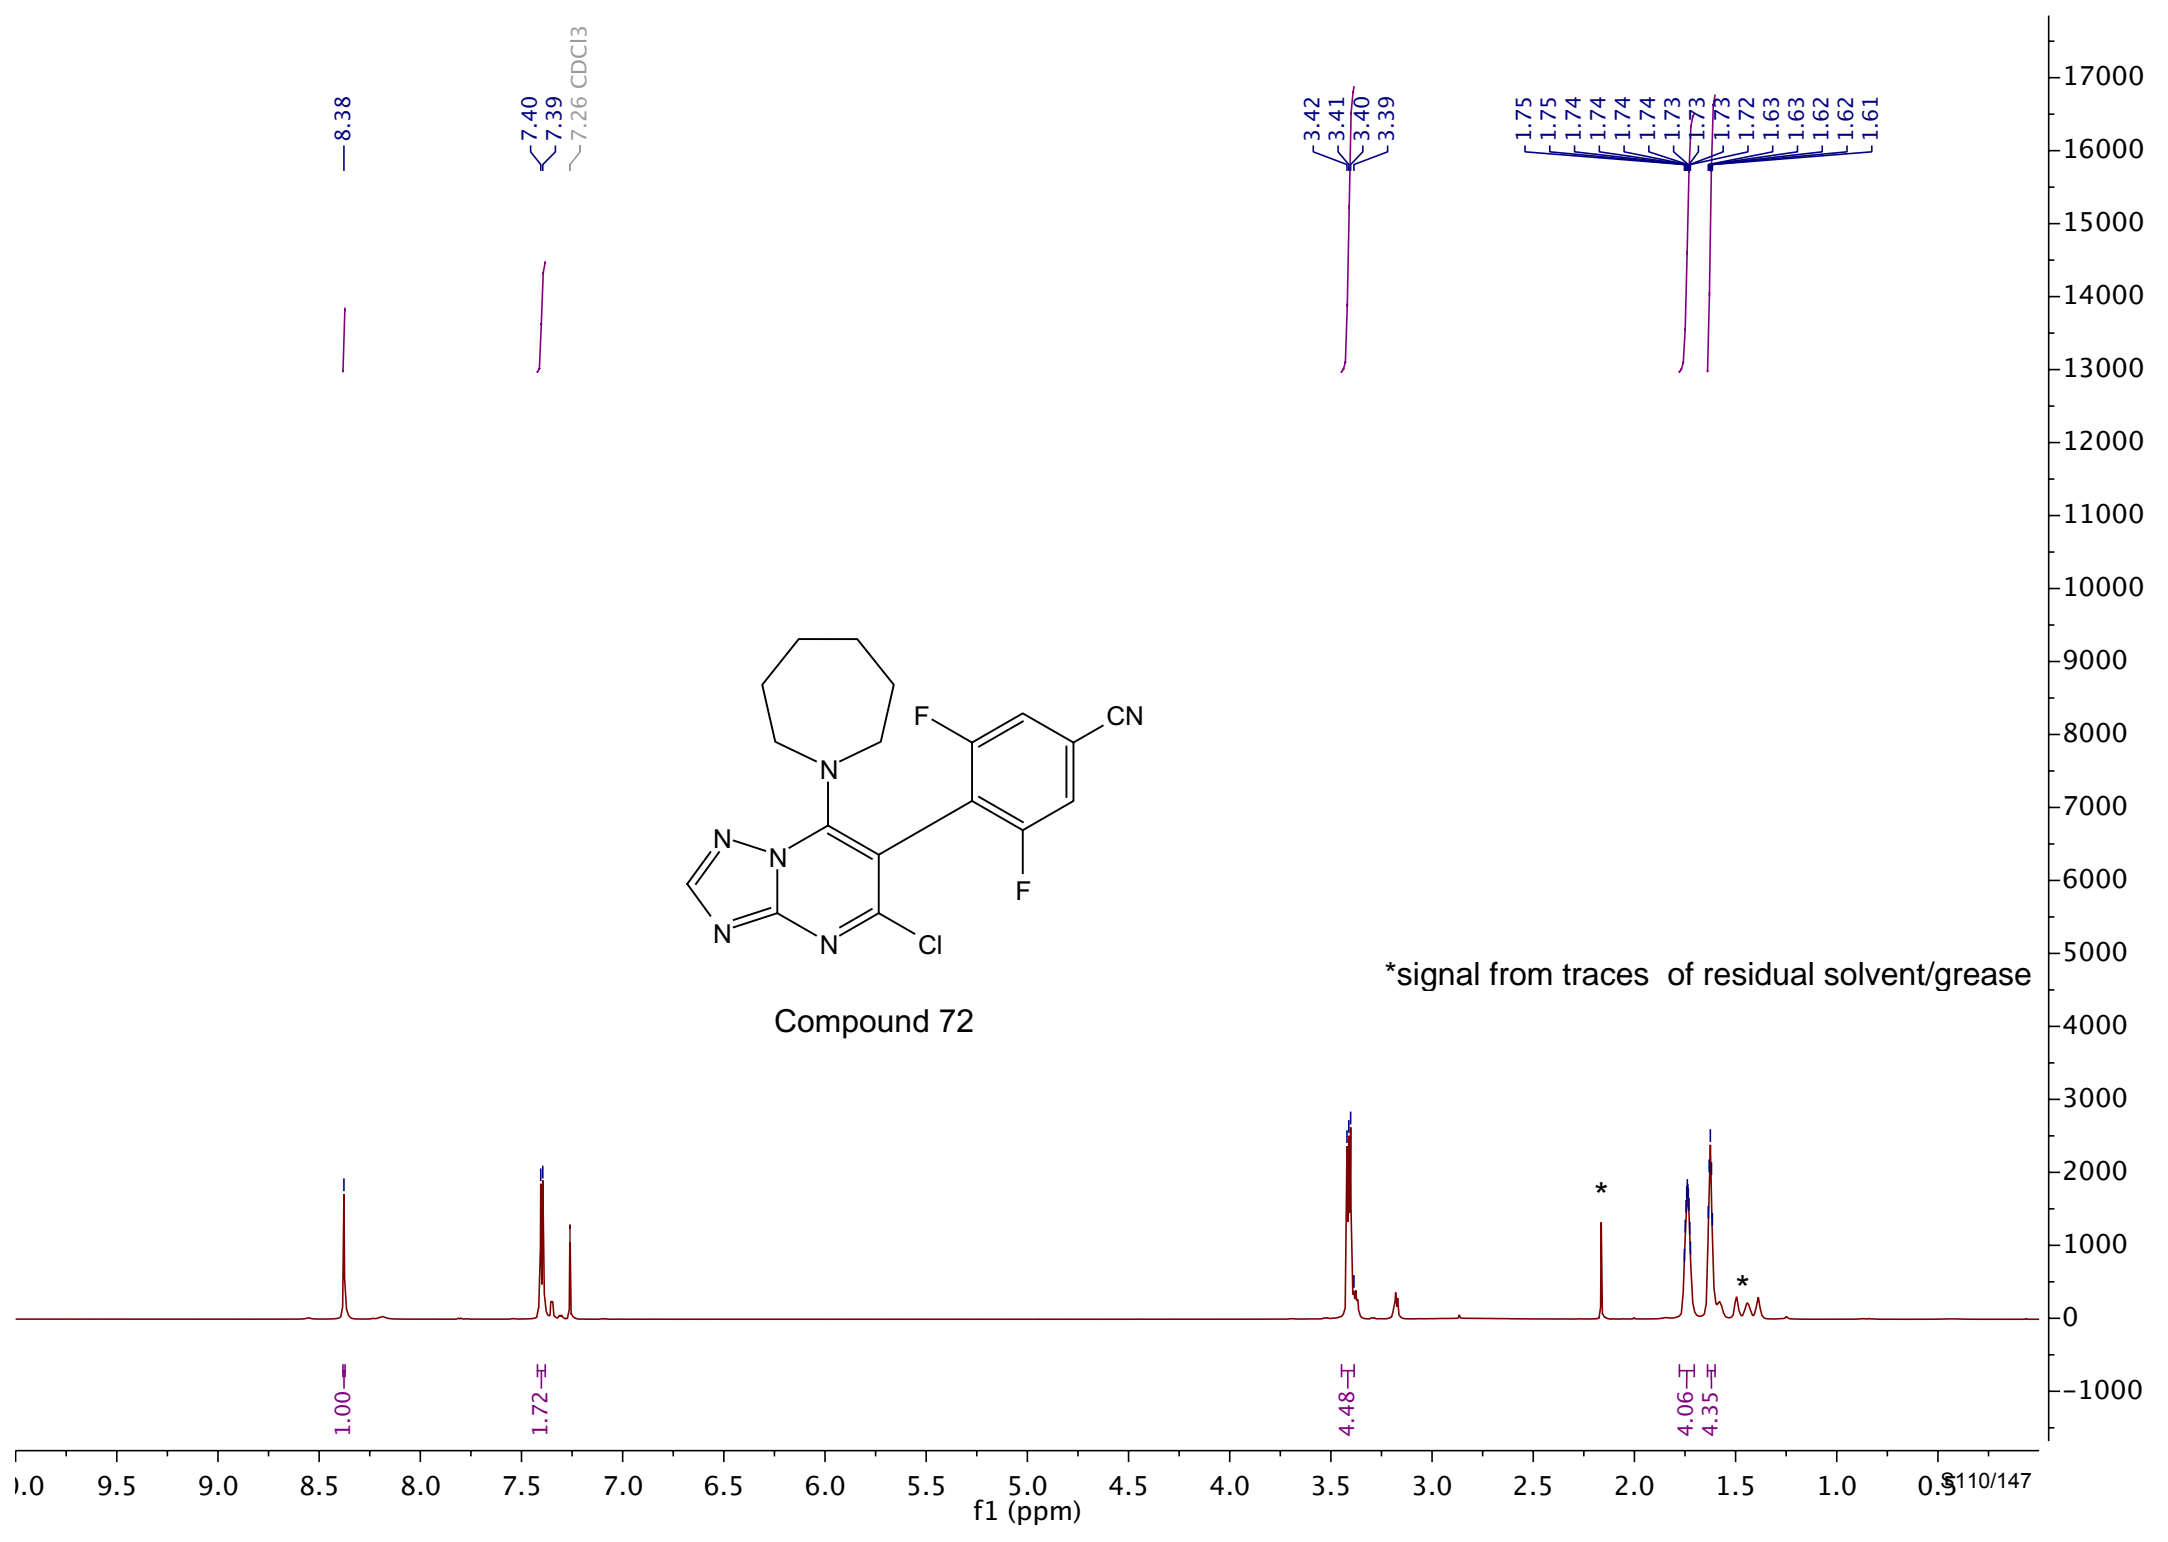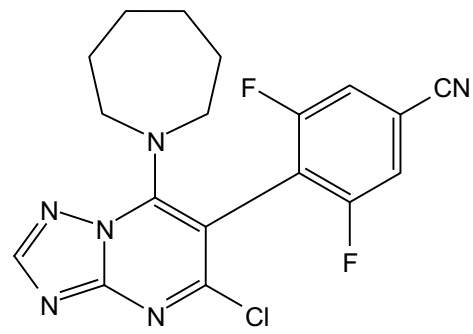

Compound 72

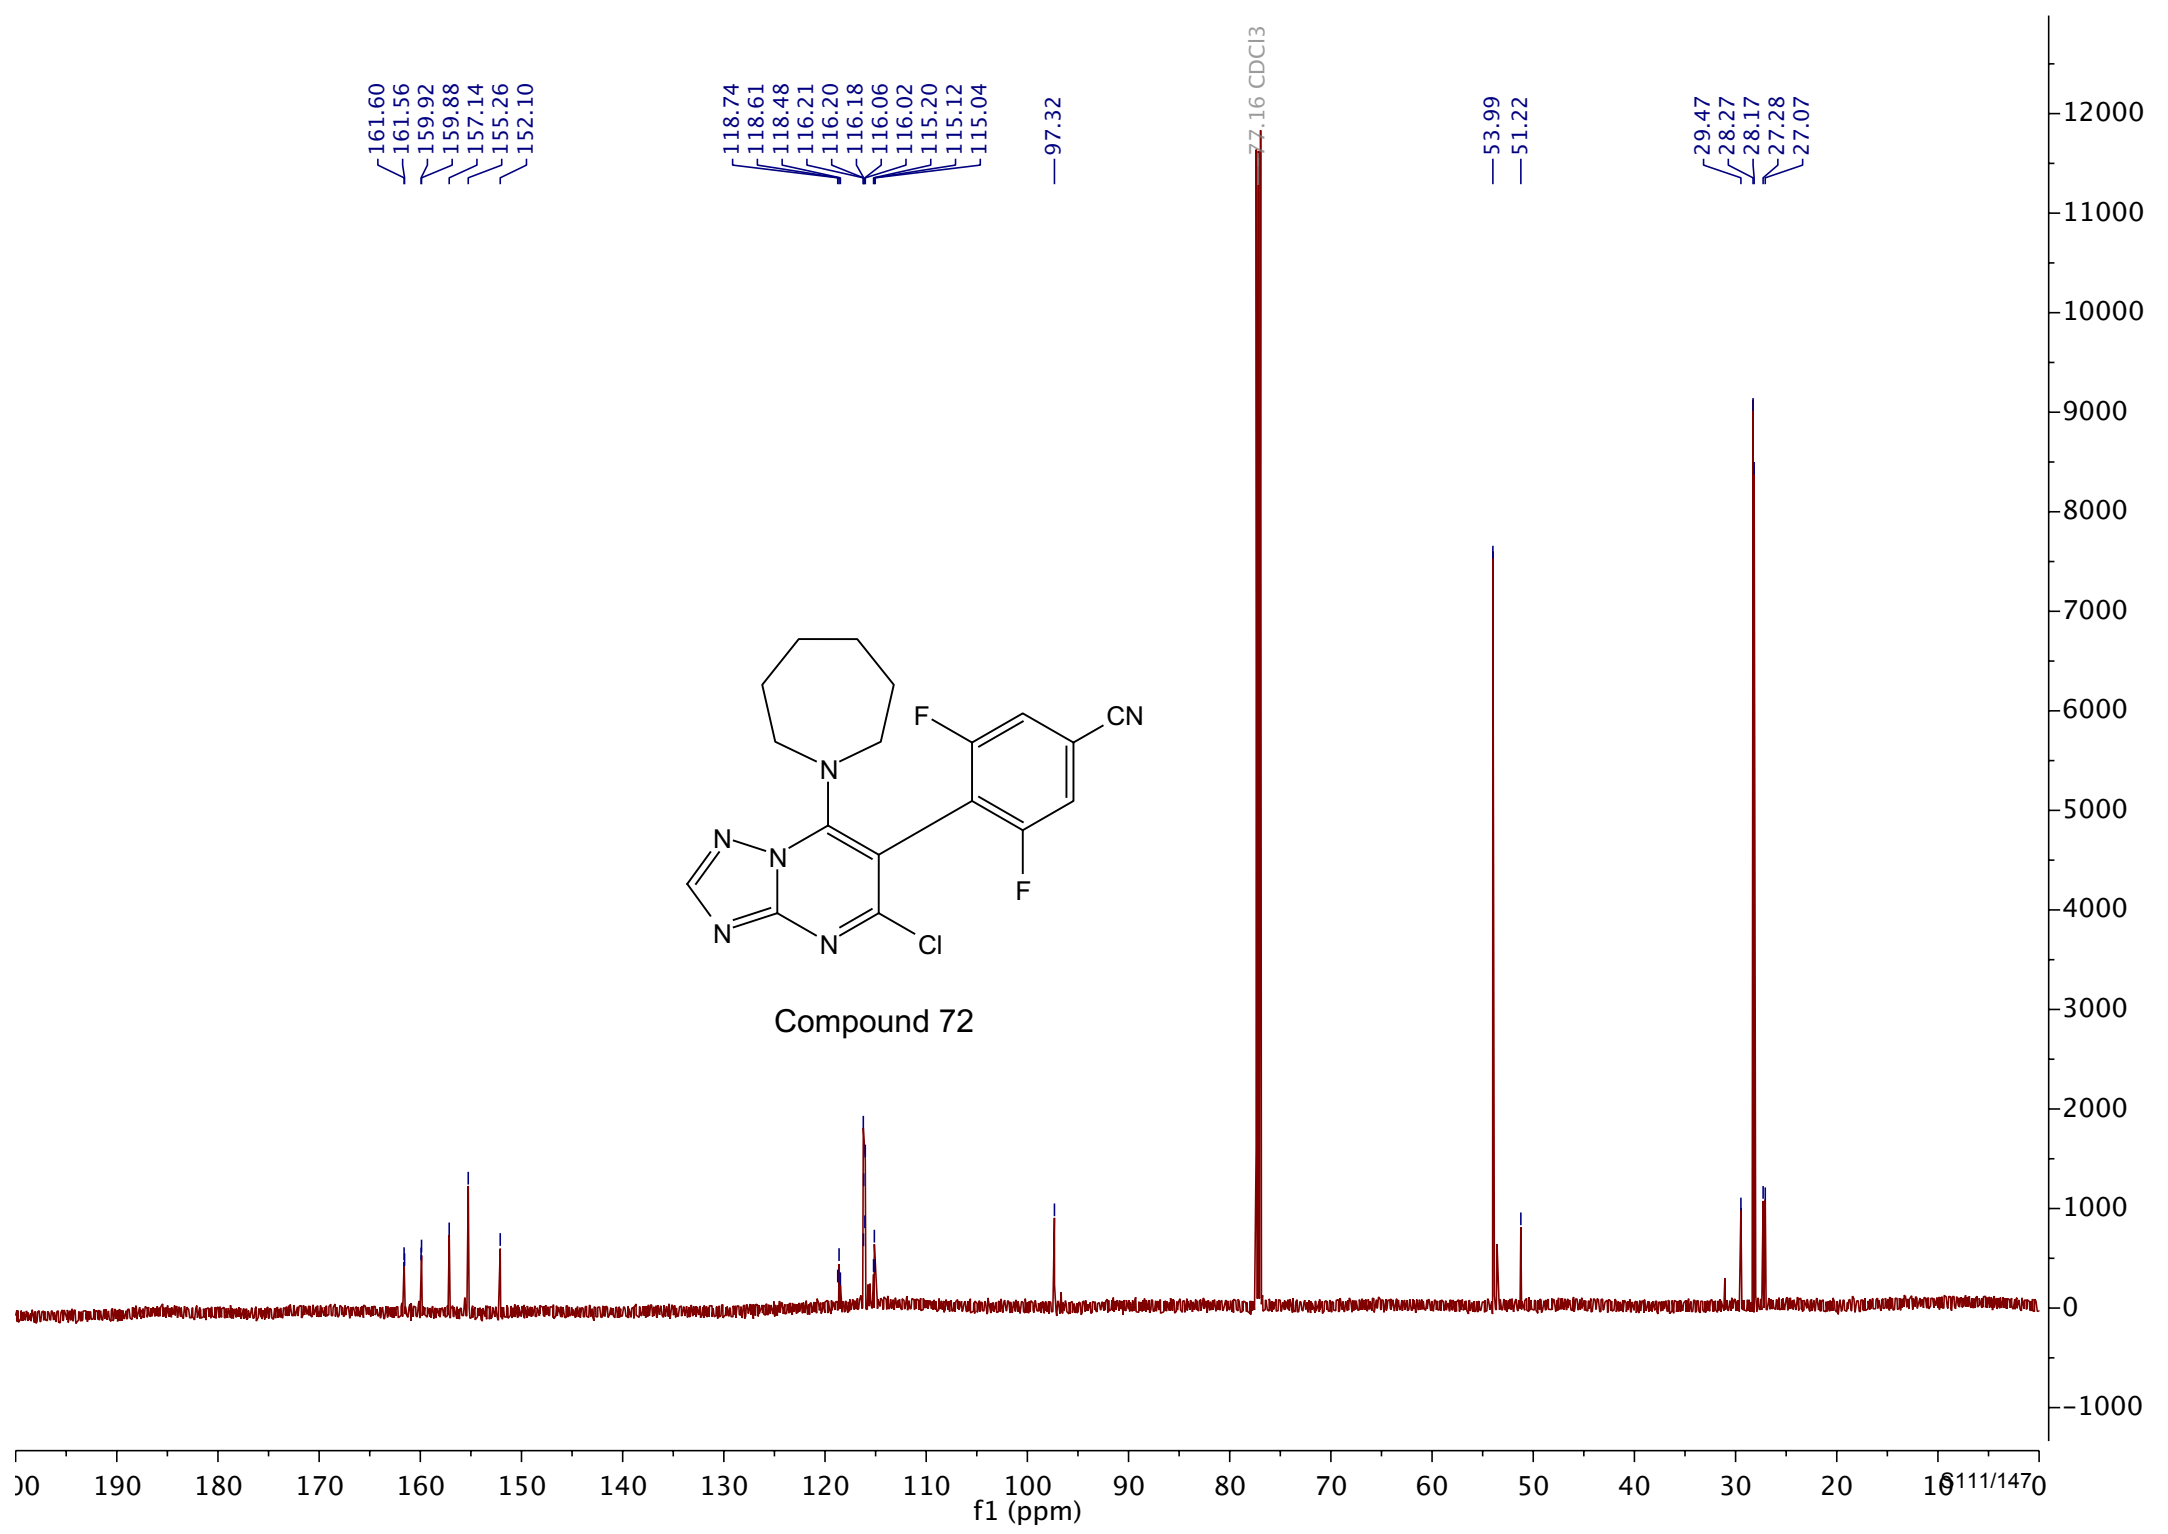



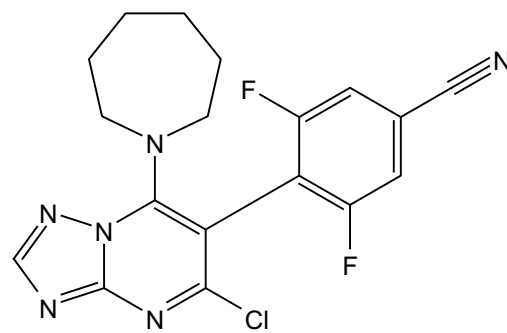

Compound 72

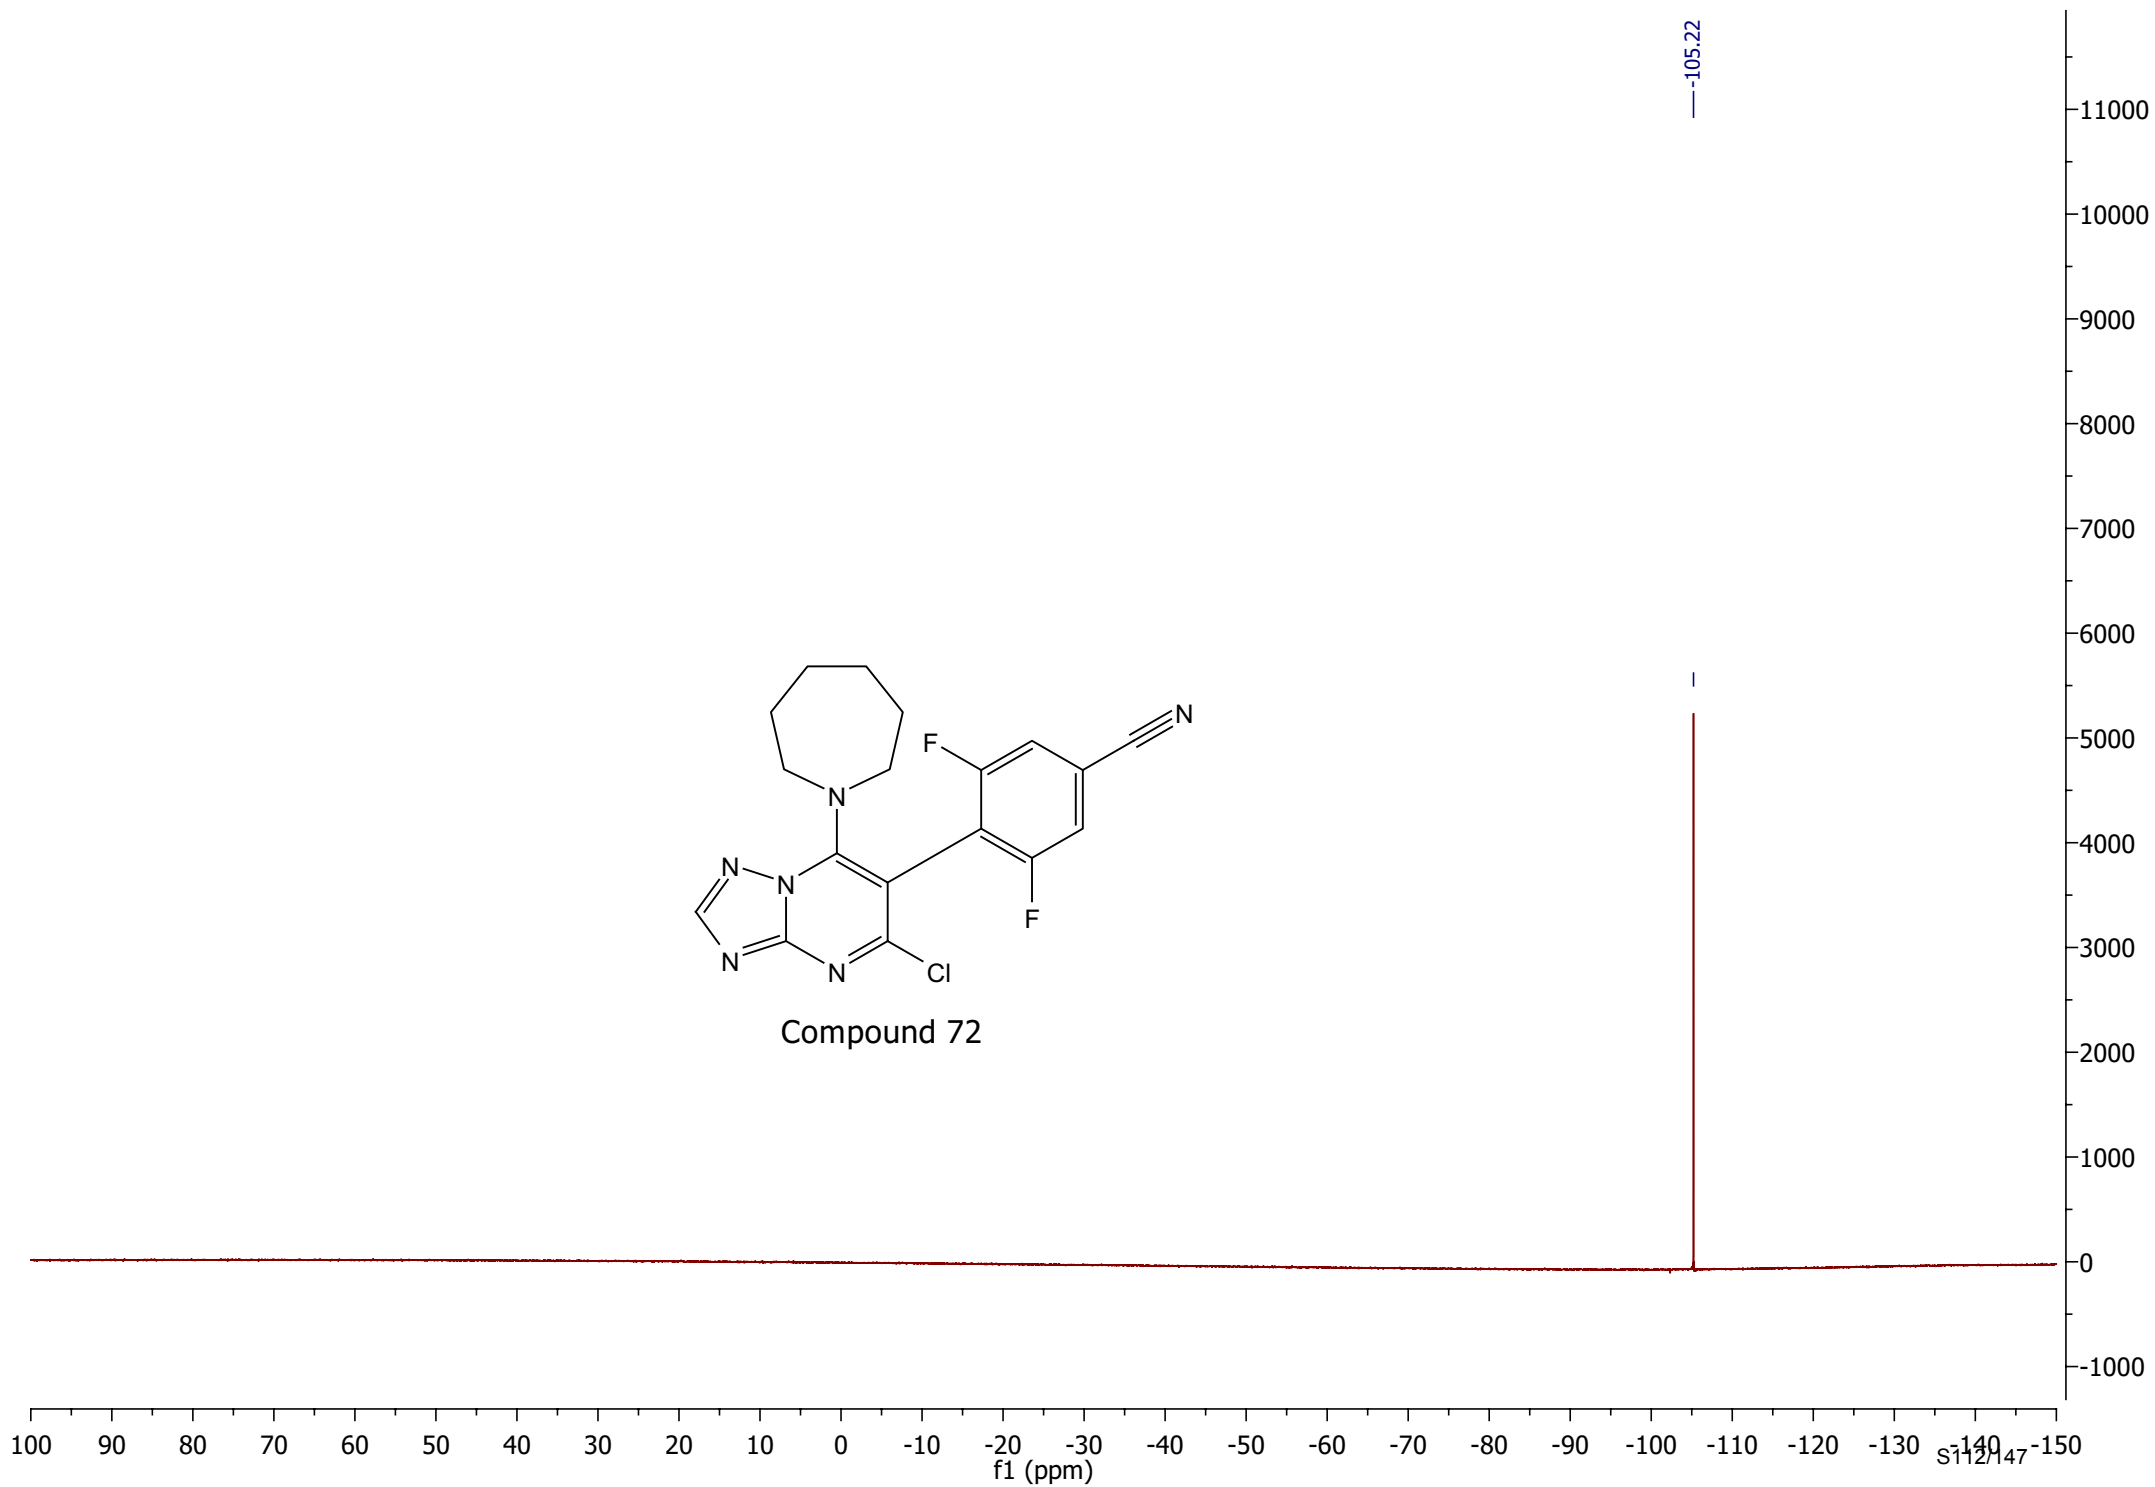

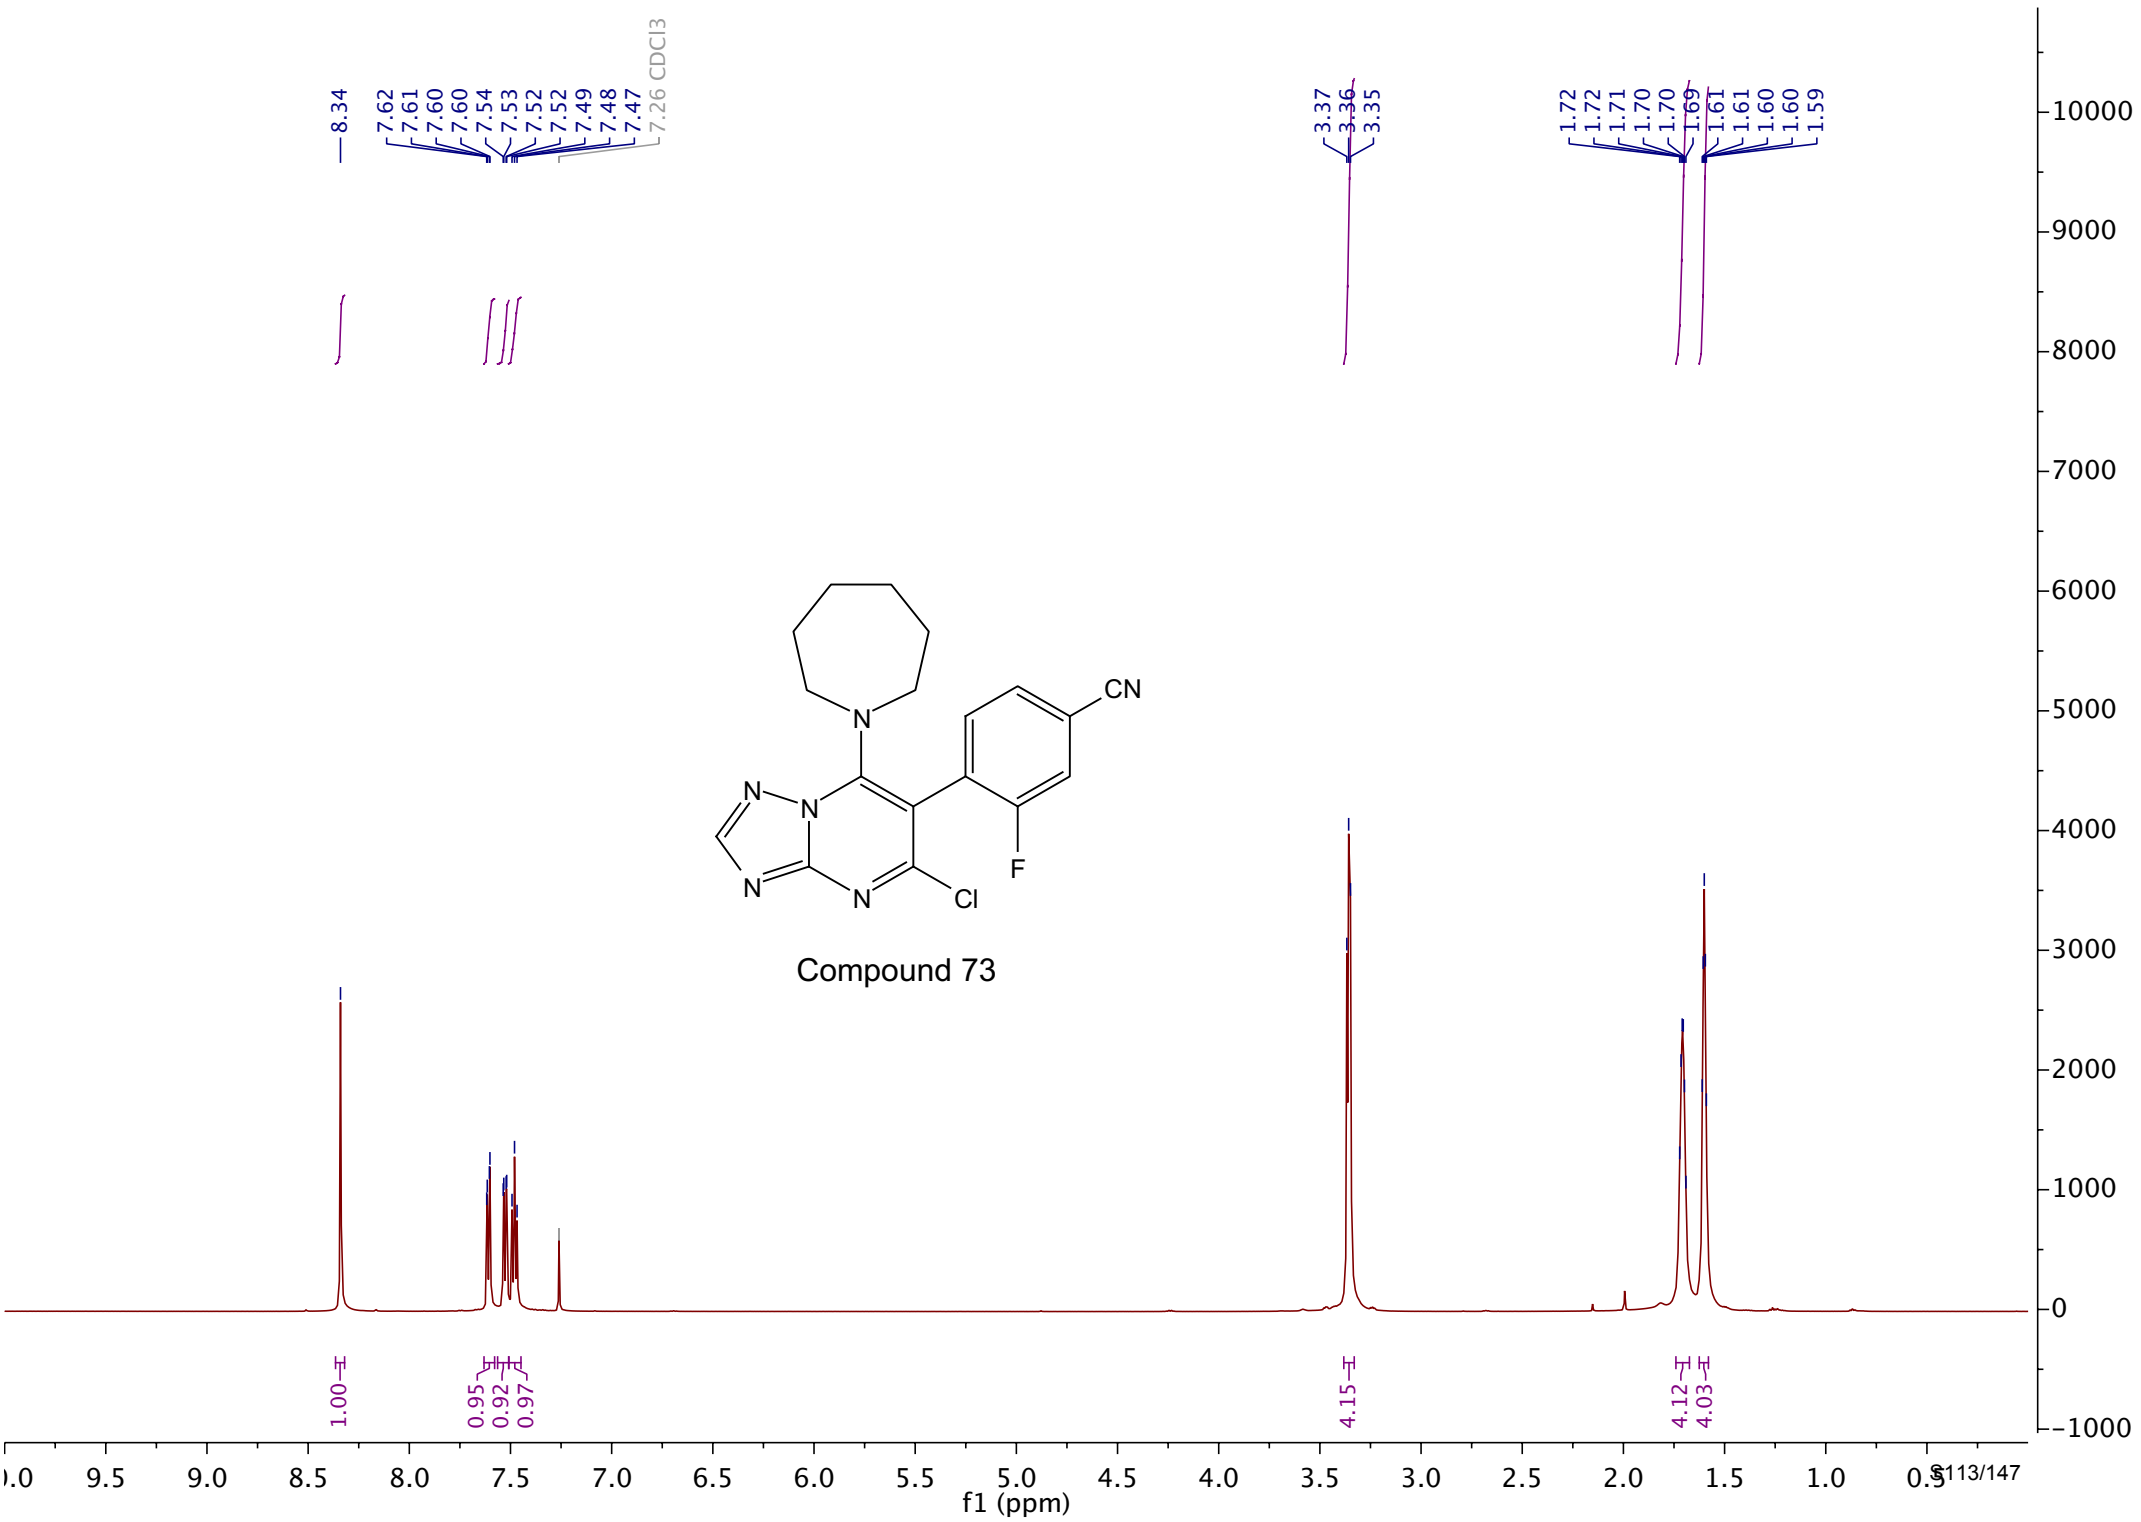

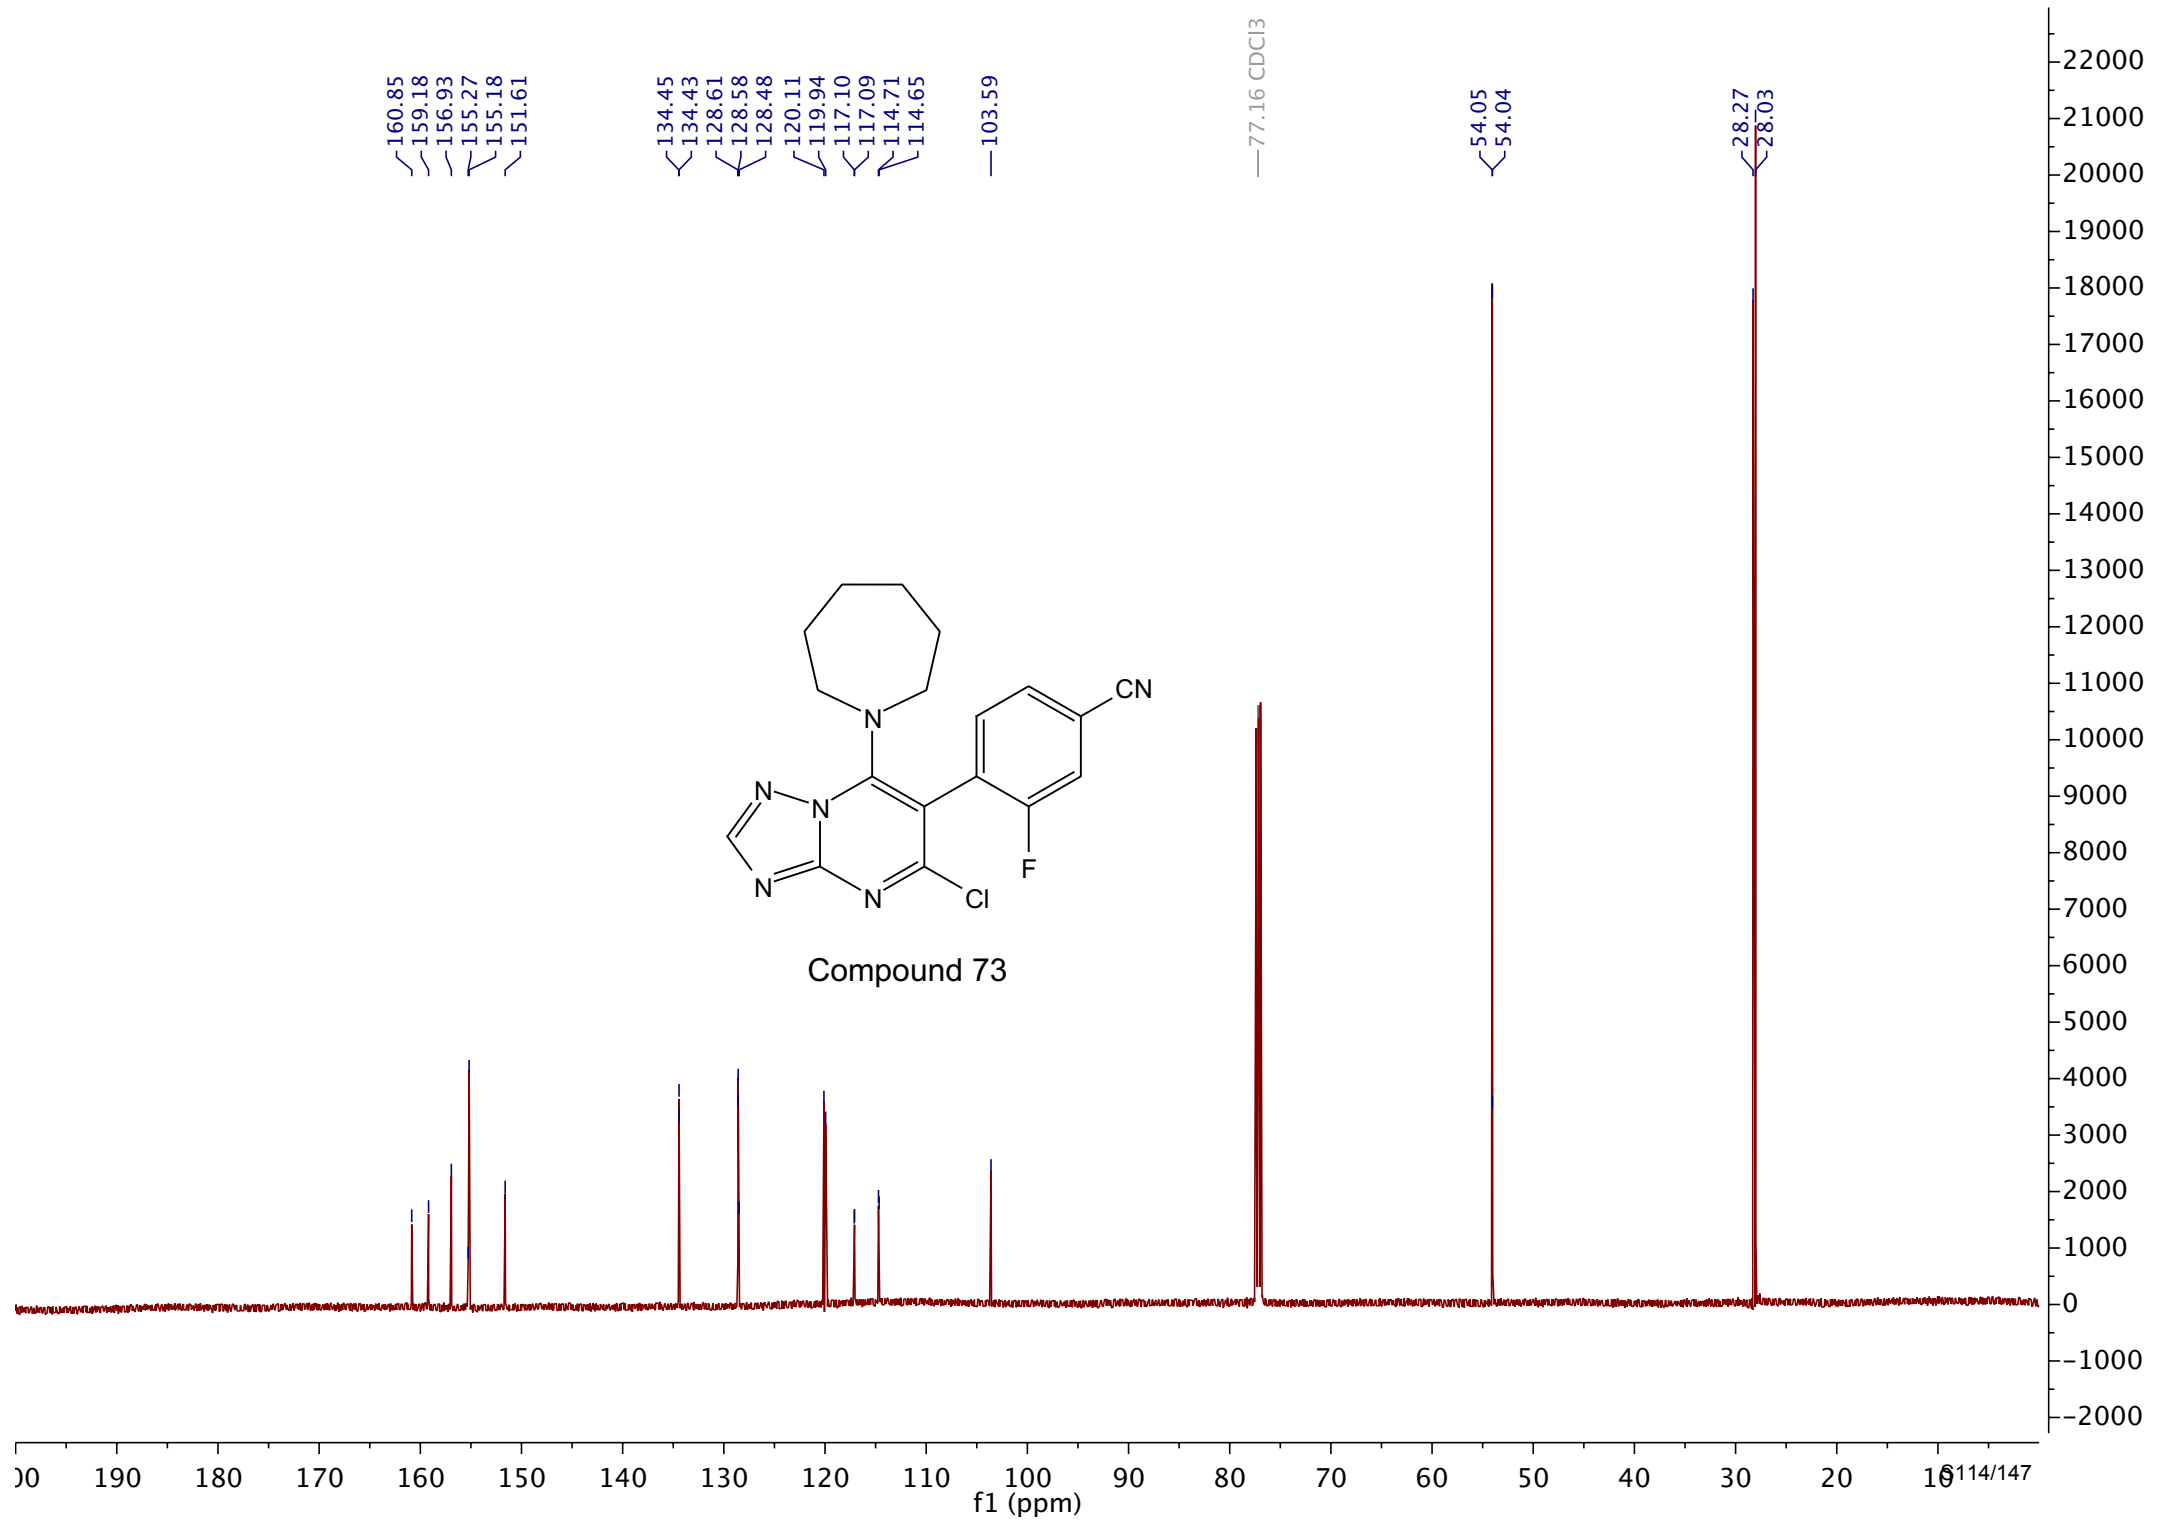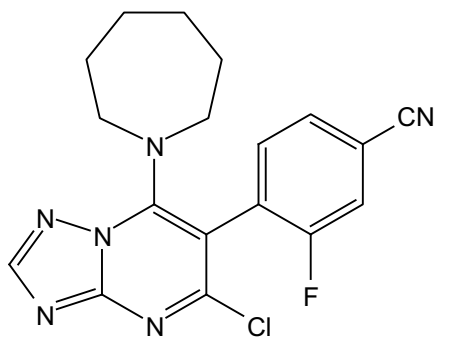

Compound 73

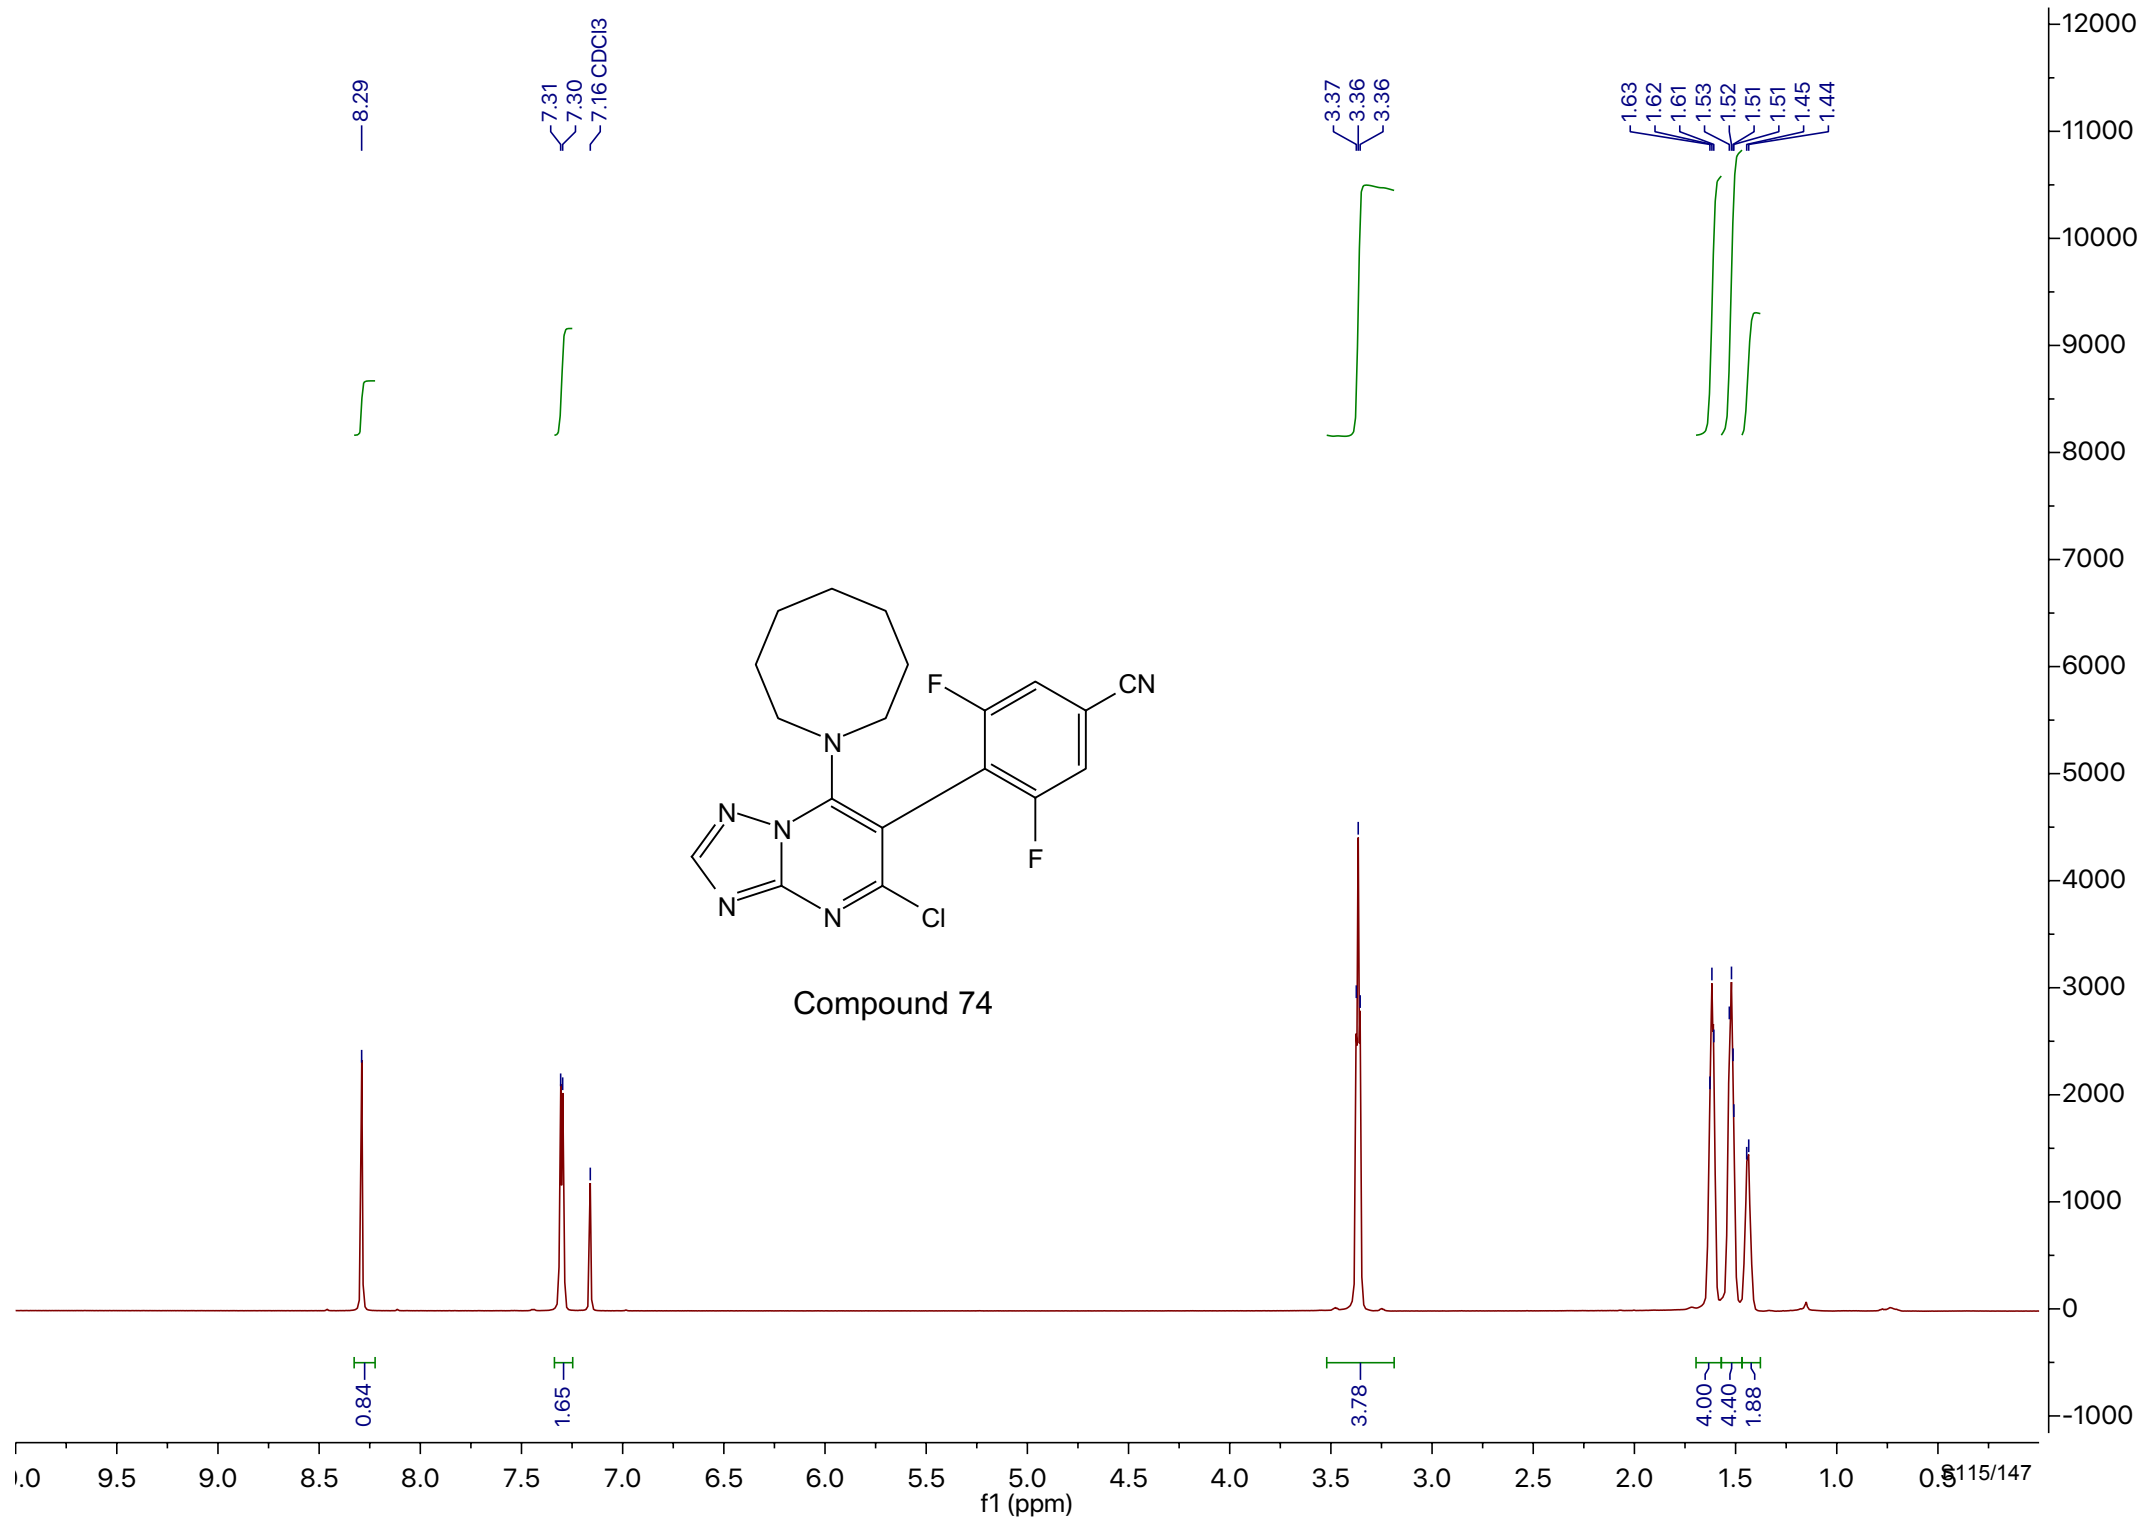

161.54  
161.50  
159.86  
159.82  
157.23  
155.73  
155.12  
151.06

118.69  
118.55  
118.42  
116.38  
116.34  
116.23  
116.19  
116.16  
116.14  
115.30  
115.23  
115.15

97.29

77.46 CDCl3

52.24

27.72  
26.80  
24.44

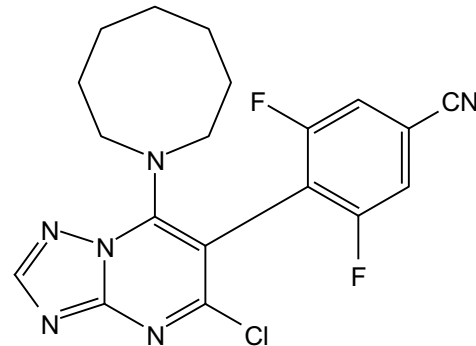

Compound 74

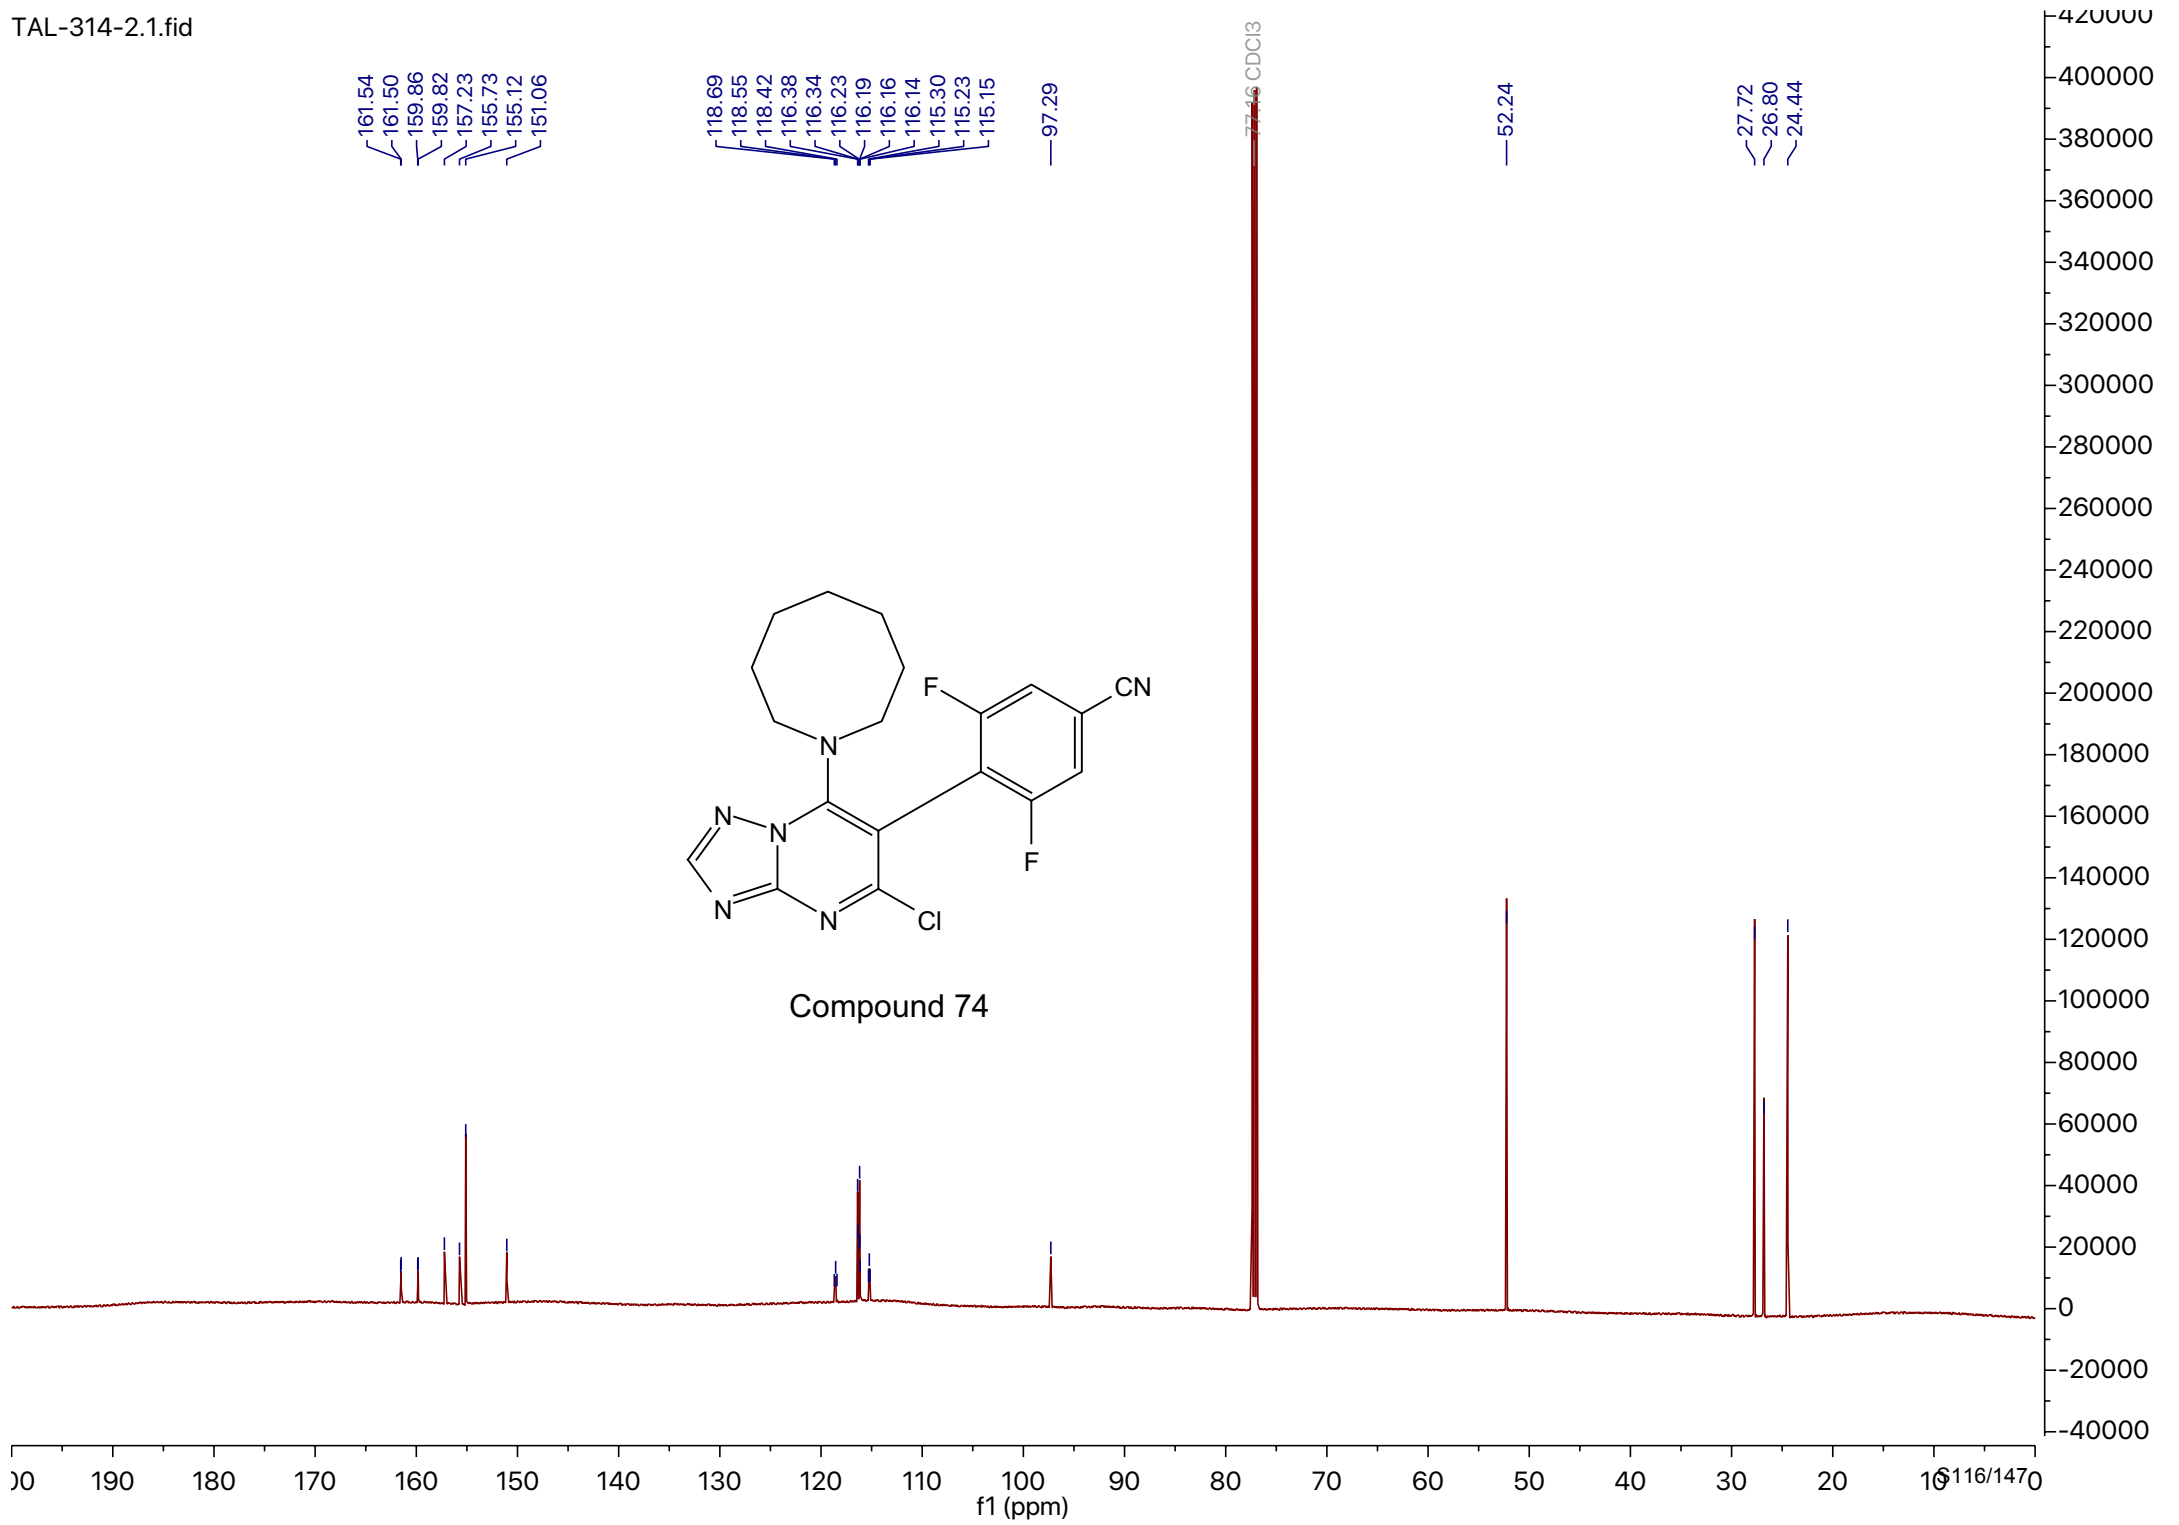

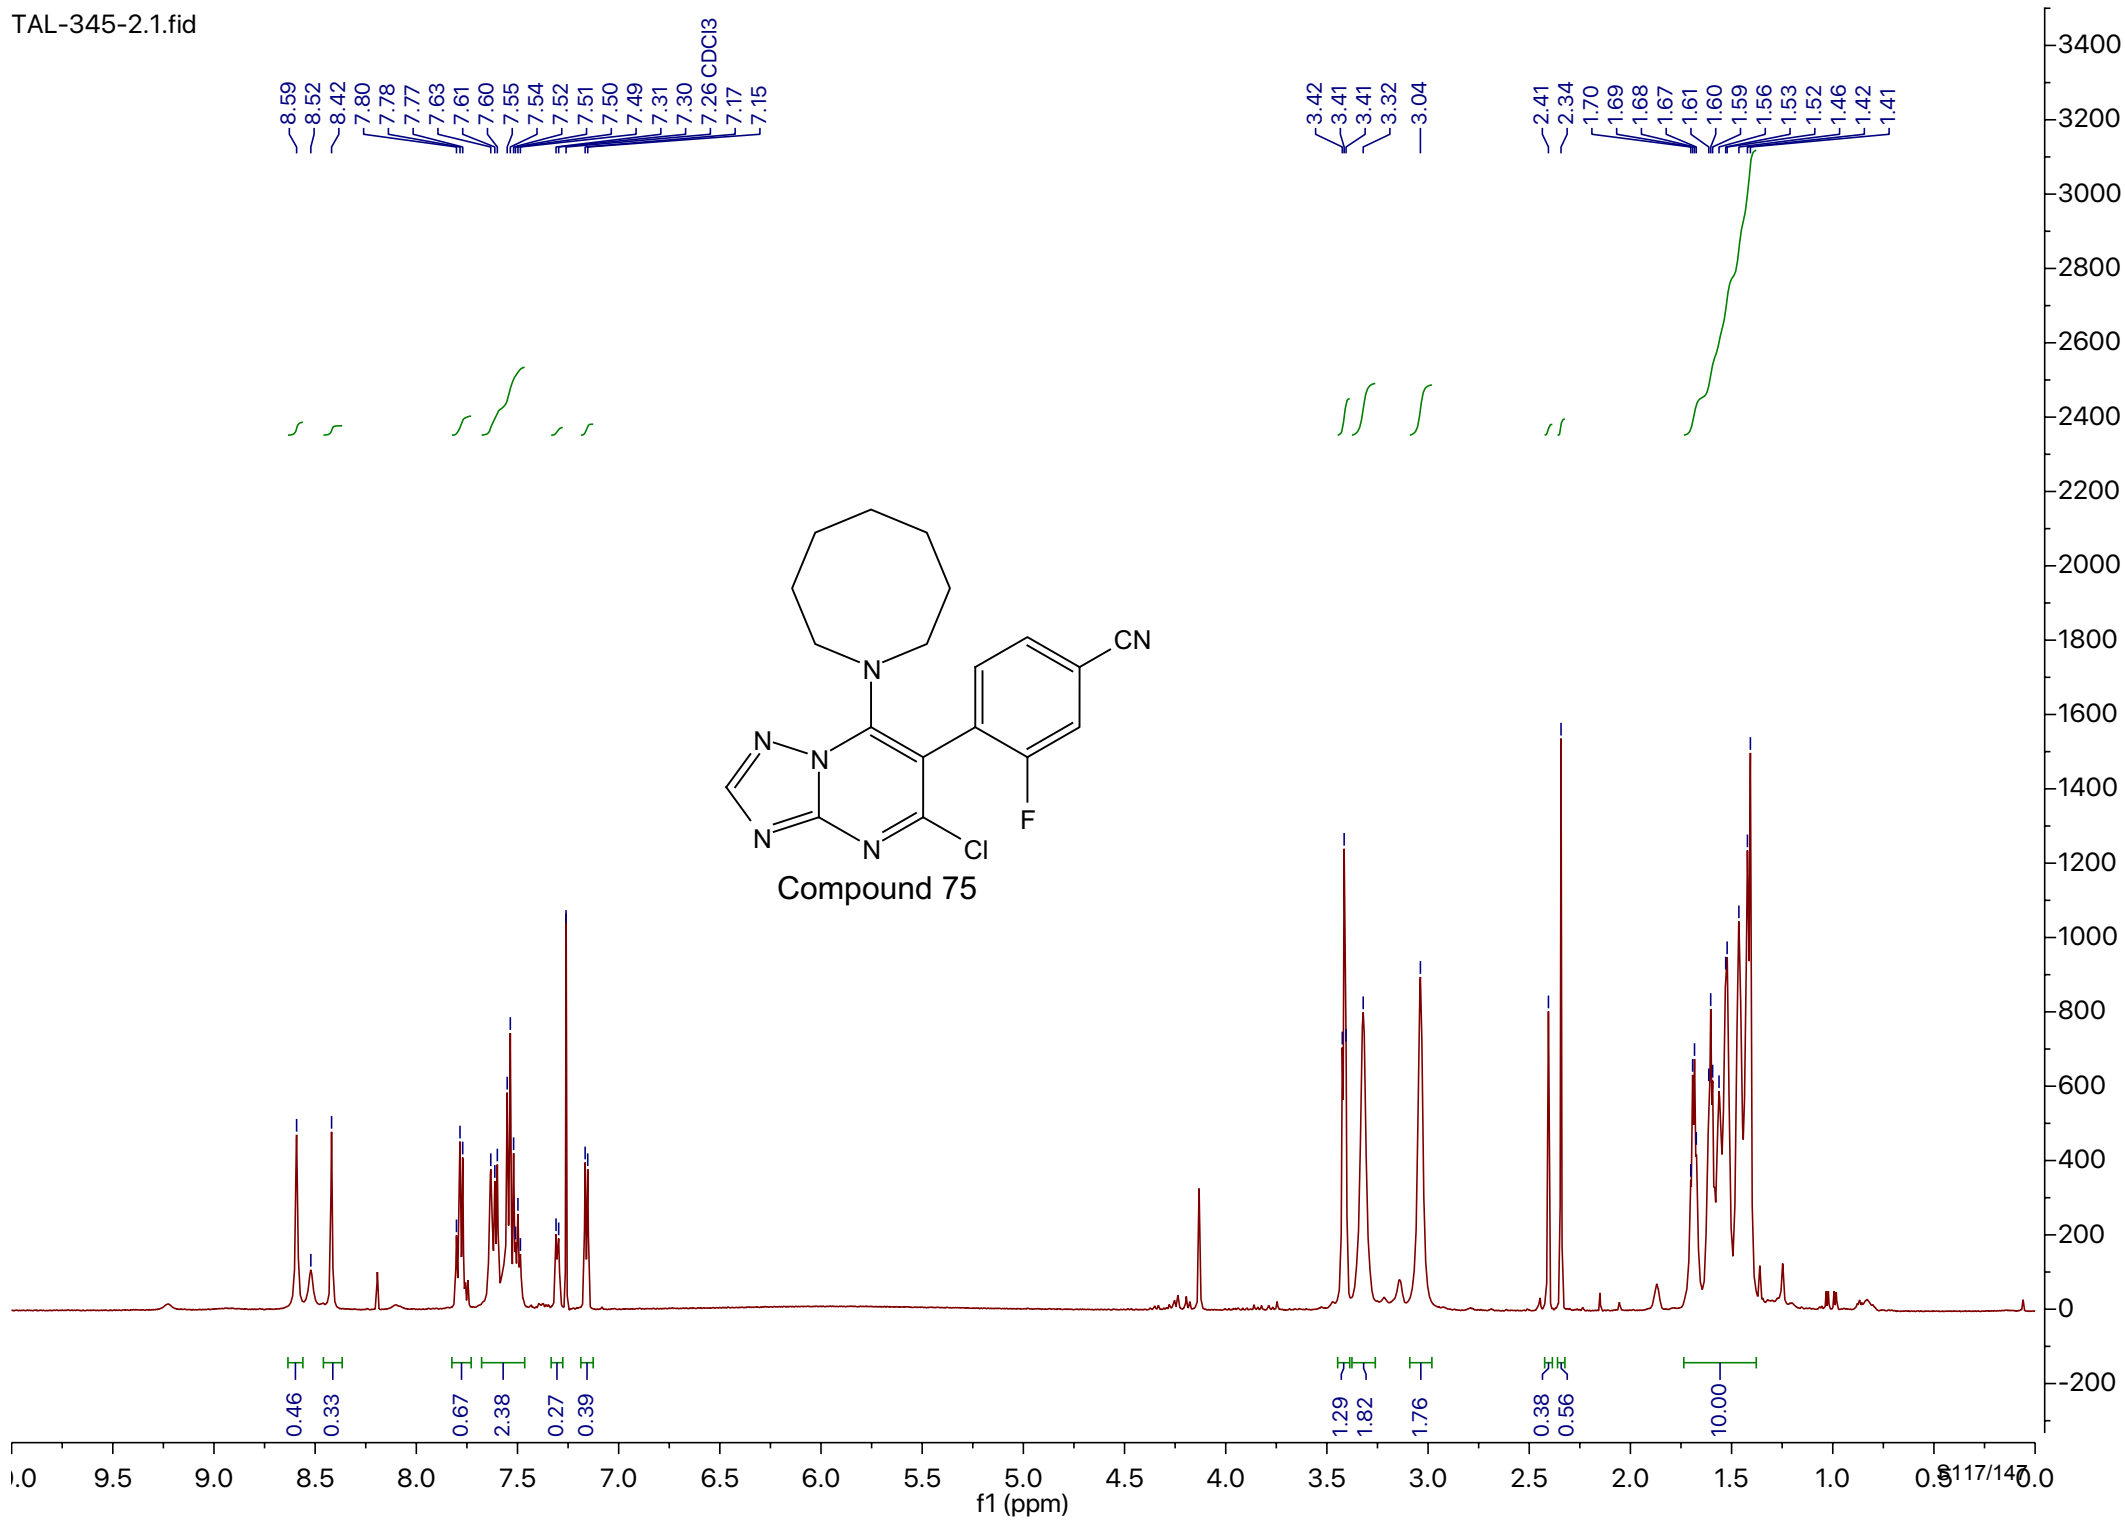

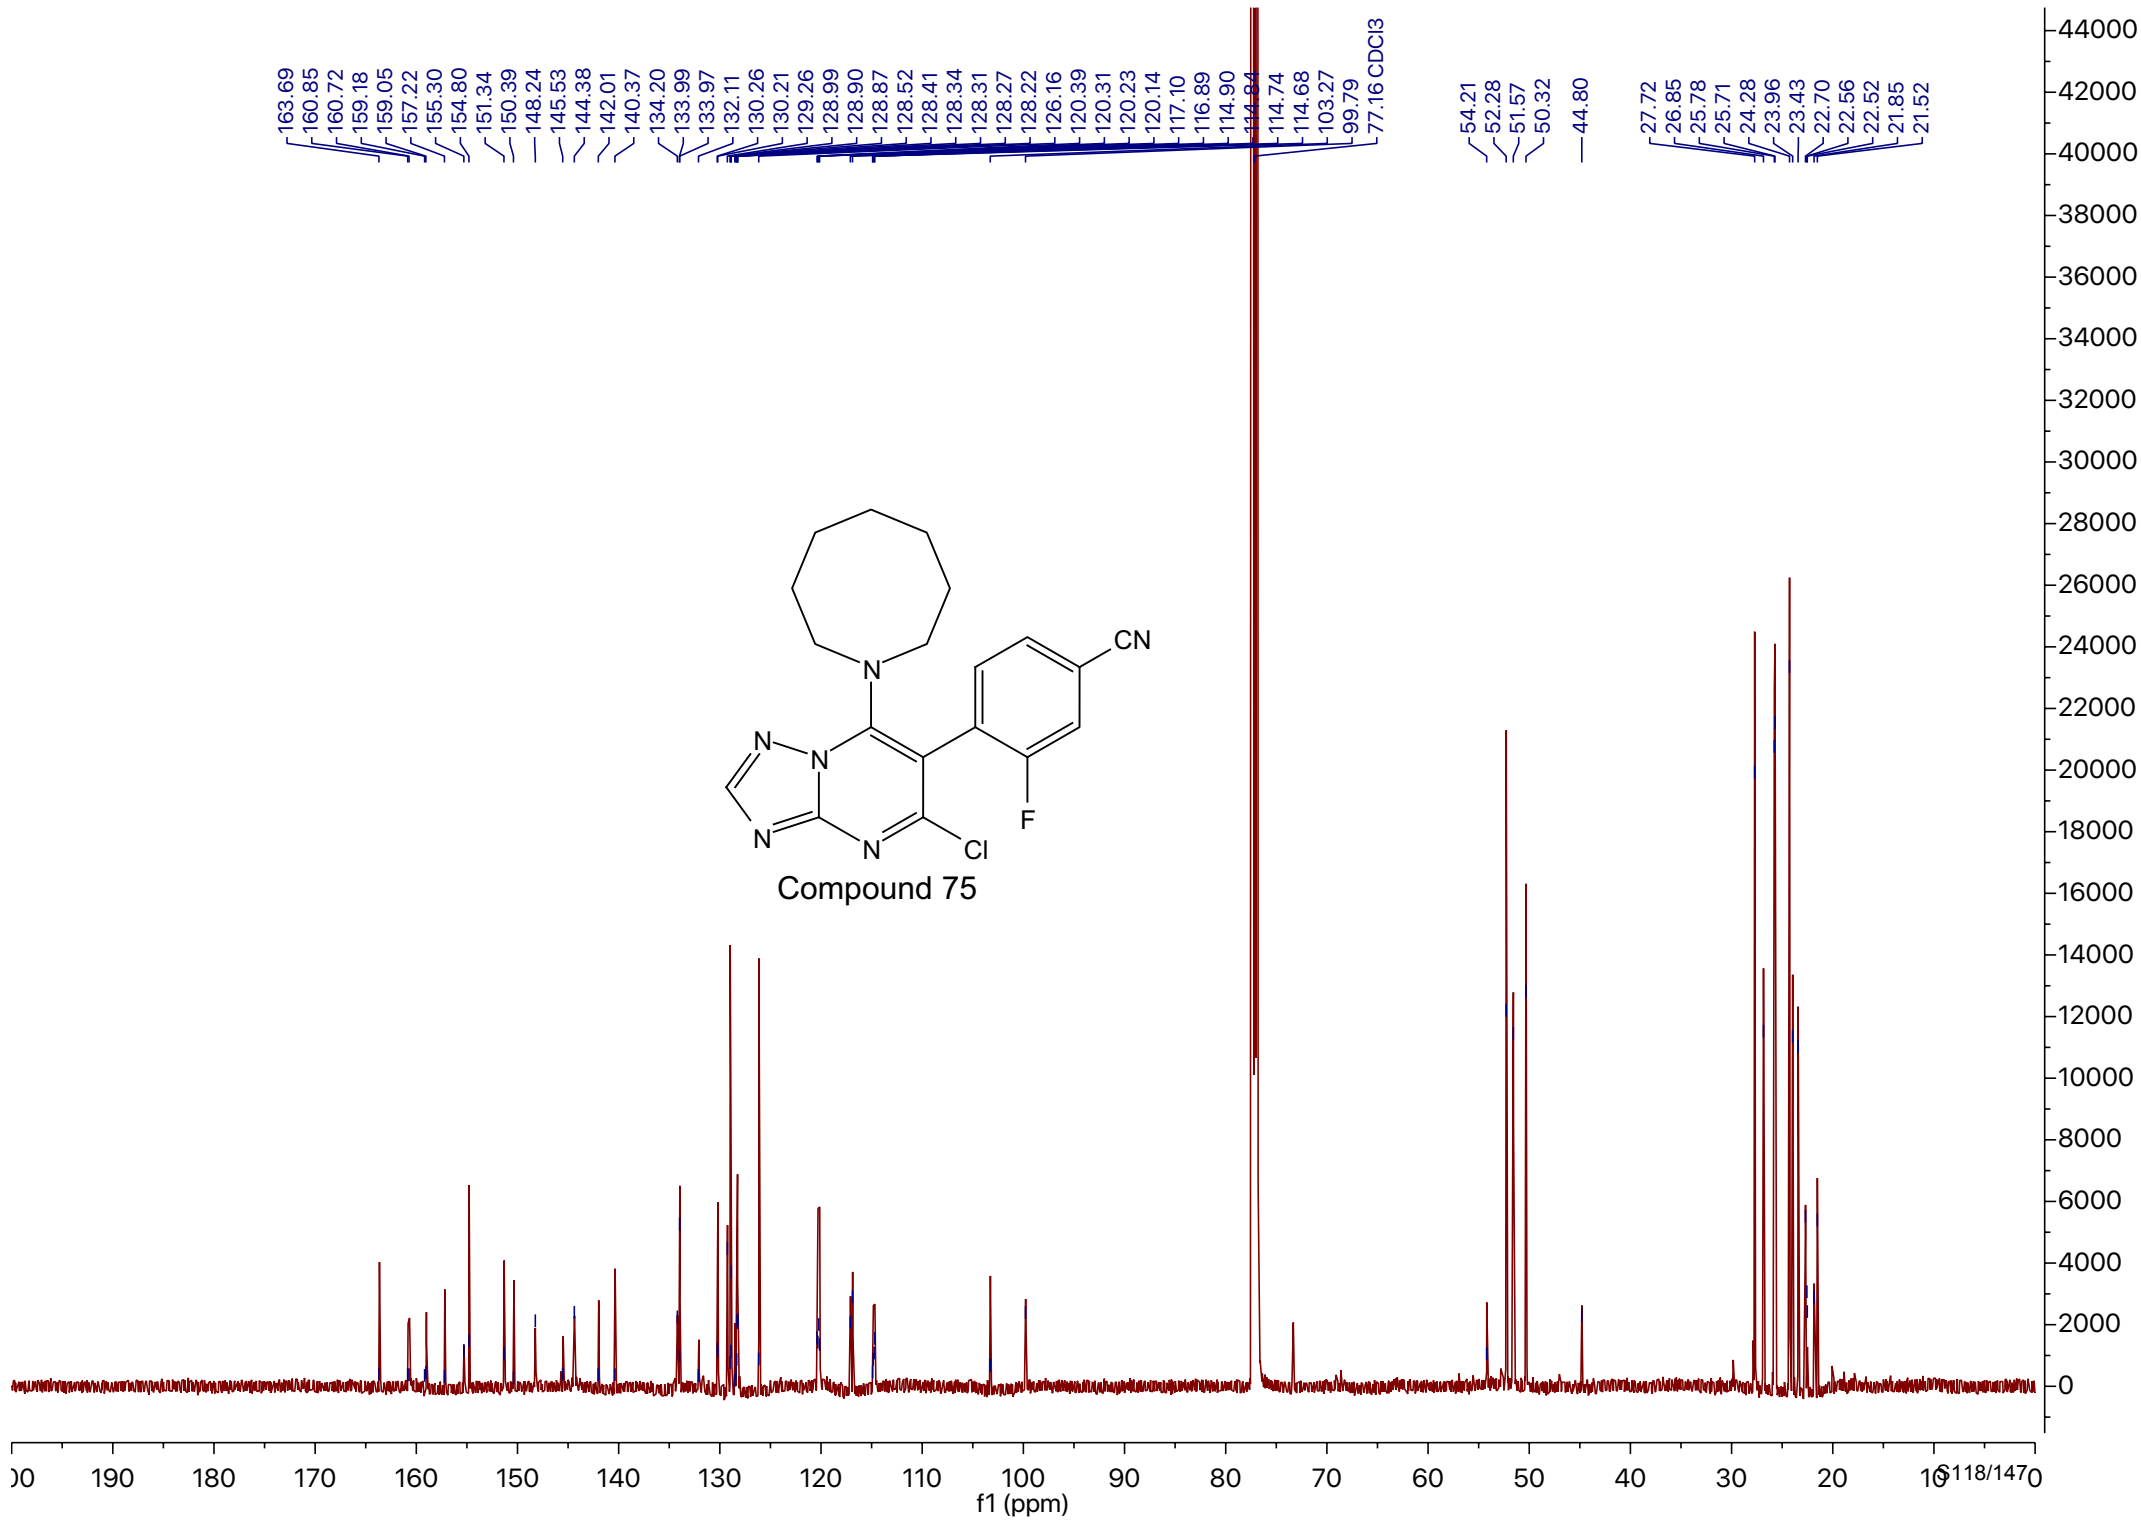

# Graph

Sample Name 69  
Application Name UV Only (Administrator)  
Method Name Analytical UV Only  
Configuration Name UV Only Config  
Version 17  
Data Instrument Name Detector  
Data Channel Name 159 Channel 1  
Notes  
Injection Number 2

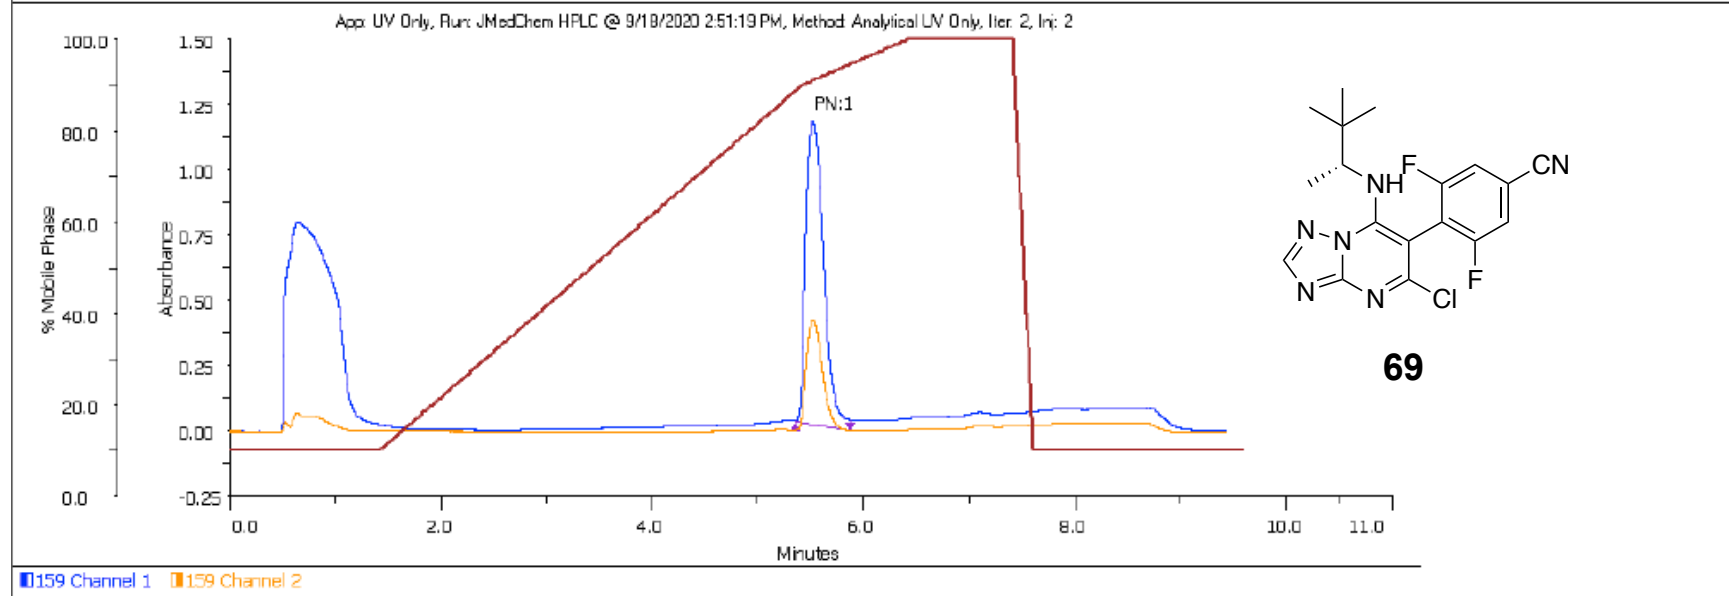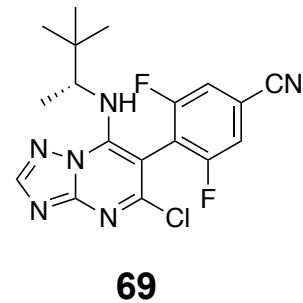

## Sample Table

| Sample Name | Retention Time (min) | Area (mAUmin x100) | Area % | Height (AU) |  |  |  |  |
|-------------|----------------------|--------------------|--------|-------------|--|--|--|--|
| 69          | 5.529                | 23132.6158         | 100    | 1.166       |  |  |  |  |



# Graph

Sample Name 66  
Application Name UV Only (Administrator)  
Method Name Analytical UV Only  
Configuration Name UV Only Config  
Version 17  
Data Instrument Name Detector  
Data Channel Name 159 Channel 1  
Notes  
Injection Number 3

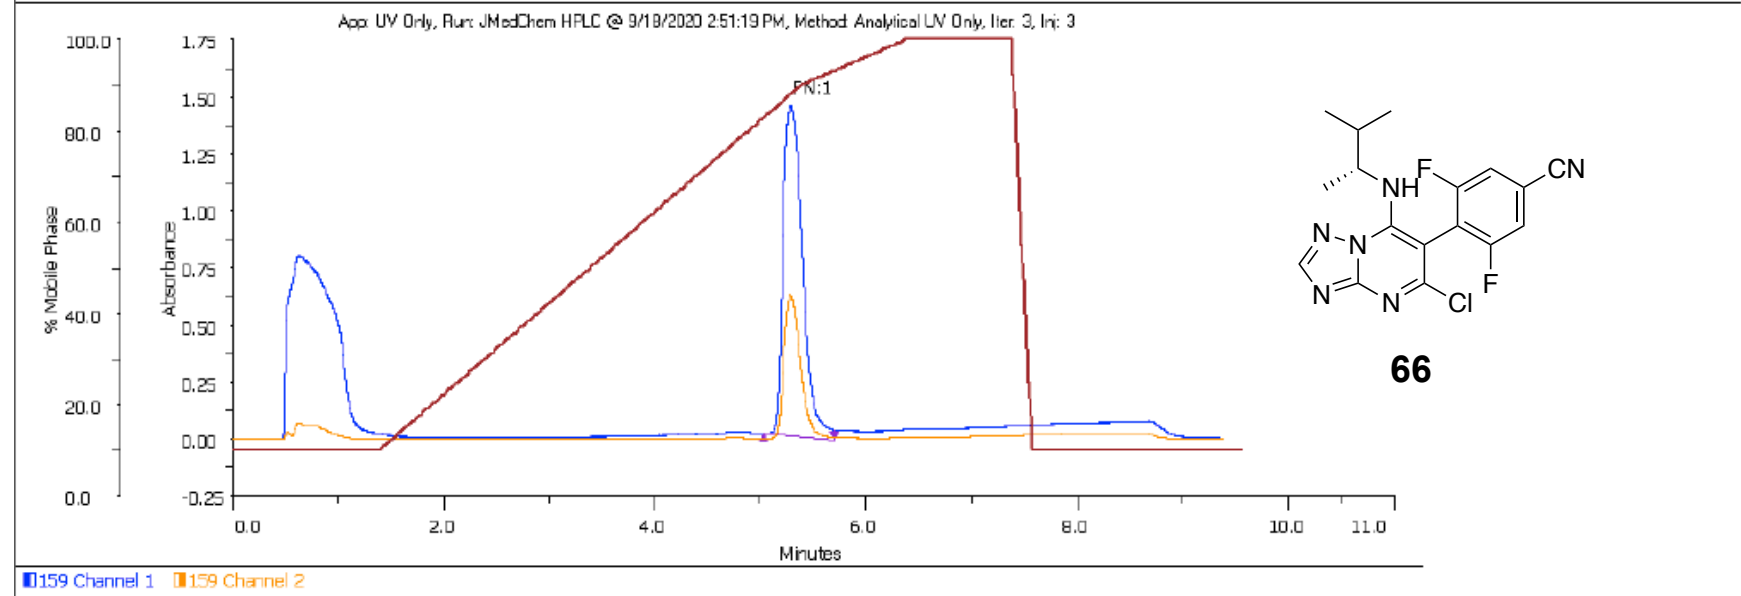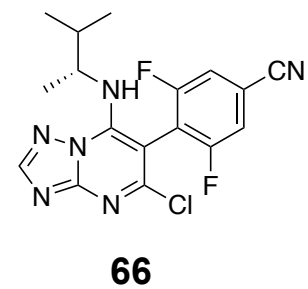

## Sample Table

| Sample Name | Retention Time (min) | Area (mAUmin x100) | Area % | Height (AU) |  |  |  |  |  |
|-------------|----------------------|--------------------|--------|-------------|--|--|--|--|--|
| 66          | 5.299                | 31371.6585         | 100    | 1.45        |  |  |  |  |  |

# Graph

Sample Name 72  
Application Name UV Only (Administrator)  
Method Name Analytical UV Only  
Configuration Name UV Only Config  
Version 17  
Data Instrument Name Detector  
Data Channel Name 159 Channel 1  
Notes  
Injection Number 4

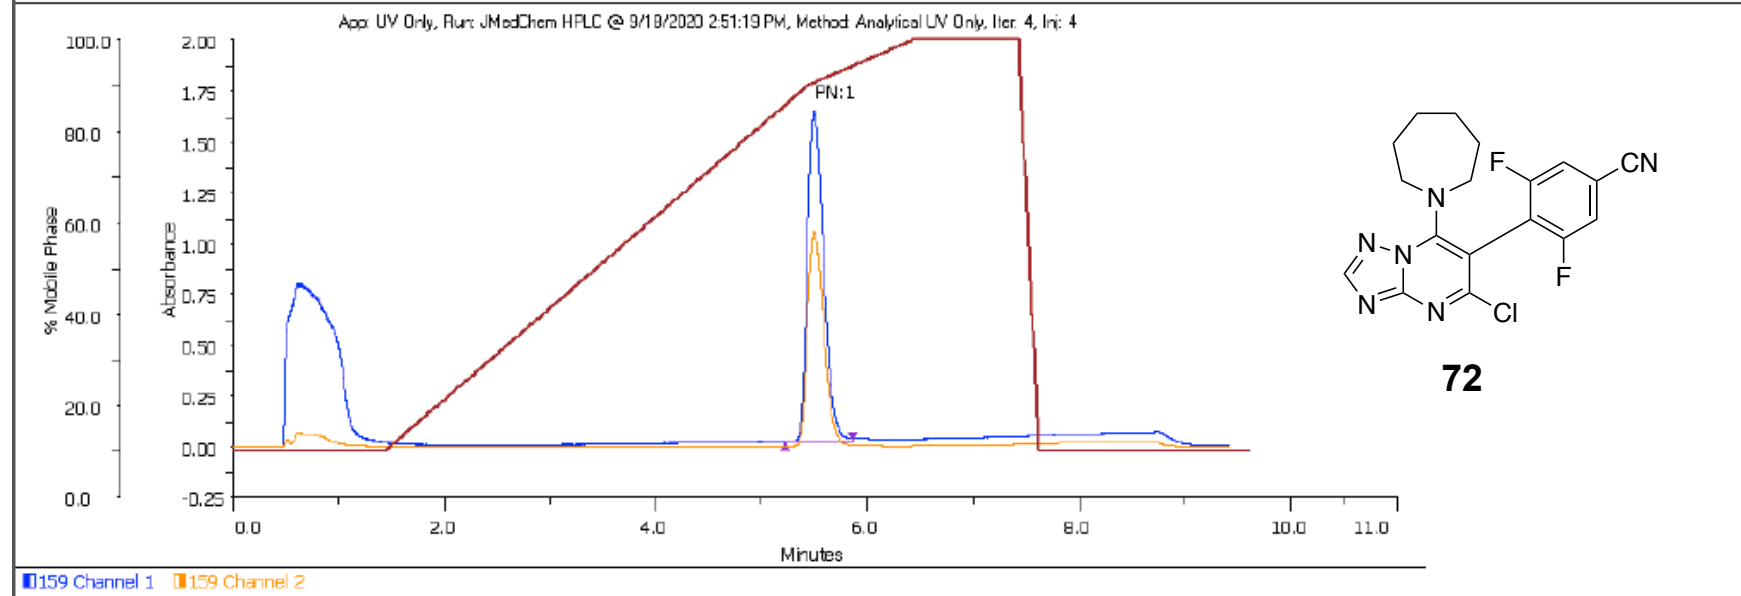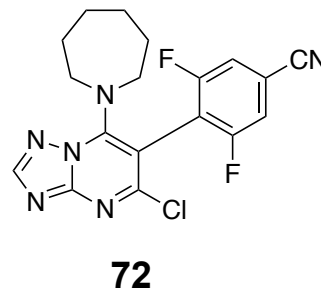

## Sample Table

| Sample Name | Retention Time (min) | Area (mAUmin x100) | Area % | Height (AU) |  |  |  |  |  |
|-------------|----------------------|--------------------|--------|-------------|--|--|--|--|--|
| 72          | 5.504                | 28724.2049         | 100    | 1.627       |  |  |  |  |  |

# Graph

Sample Name 51  
Application Name UV Only (Administrator)  
Method Name Analytical UV Only  
Configuration Name UV Only Config  
Version 17  
Data Instrument Name Detector  
Data Channel Name 159 Channel 1  
Notes  
Injection Number 5

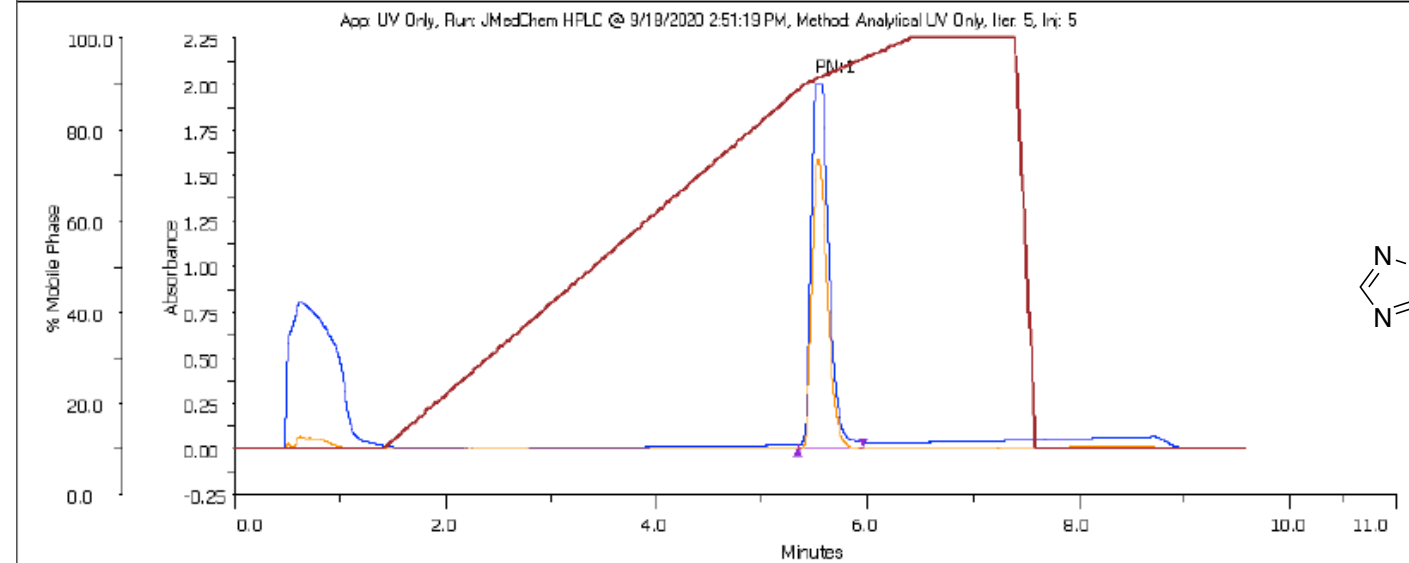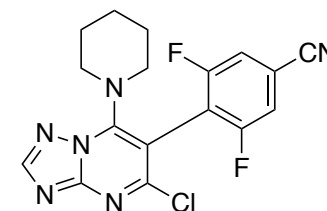

51

## Sample Table

| Sample Name | Retention Time (min) | Area (mAUmin x100) | Area % | Height (AU) |  |  |  |  |  |
|-------------|----------------------|--------------------|--------|-------------|--|--|--|--|--|
| 51          | 5.517                | 38736.4657         | 100    | 1.987       |  |  |  |  |  |

# Graph

Sample Name 64  
Application Name UV Only (Administrator)  
Method Name Analytical UV Only  
Configuration Name UV Only Config  
Version 17  
Data Instrument Name Detector  
Data Channel Name 159 Channel 1  
Notes  
Injection Number 6

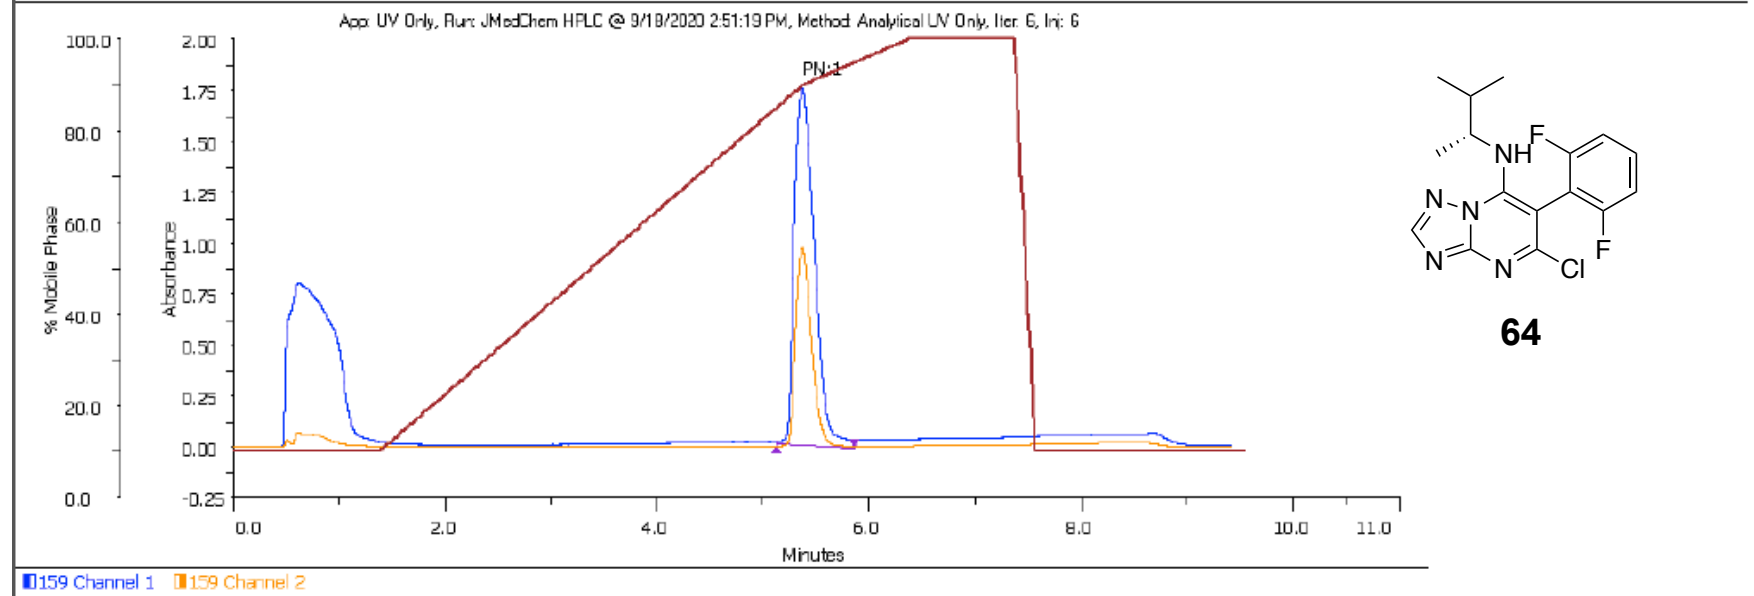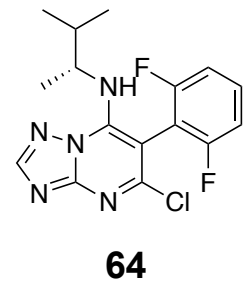

## Sample Table

| Sample Name | Retention Time (min) | Area (mAUmin x100) | Area % | Height (AU) |  |  |  |  |  |
|-------------|----------------------|--------------------|--------|-------------|--|--|--|--|--|
| 64          | 5.373                | 39104.2447         | 100    | 1.761       |  |  |  |  |  |

# Graph

Sample Name 74  
Application Name UV Only (Administrator)  
Method Name Analytical UV Only  
Configuration Name UV Only Config  
Version 17  
Data Instrument Name Detector  
Data Channel Name 159 Channel 1  
Notes  
Injection Number 7

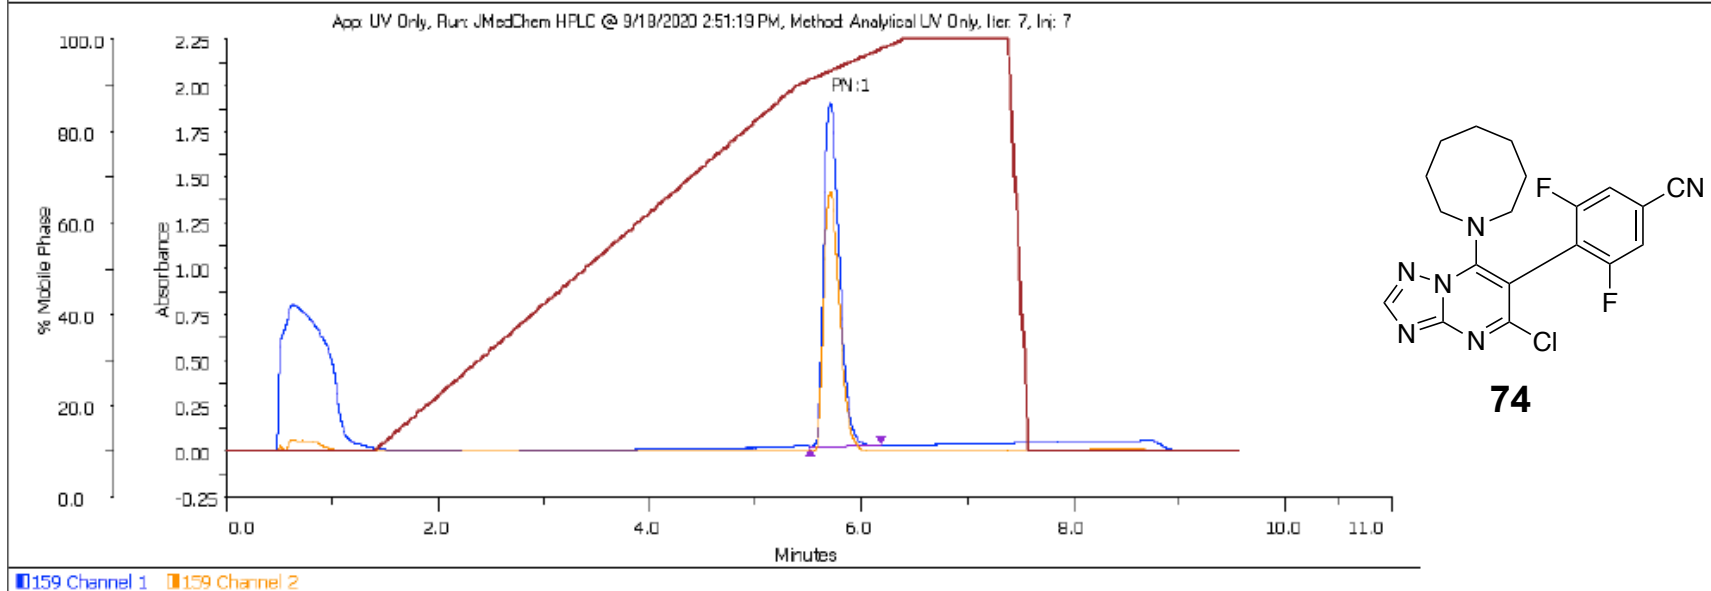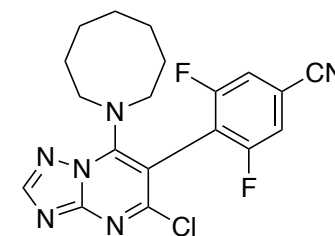

74

## Sample Table

| Sample Name | Retention Time (min) | Area (mAUmin x100) | Area % | Height (AU) |  |  |  |  |  |
|-------------|----------------------|--------------------|--------|-------------|--|--|--|--|--|
| 74          | 5.712                | 32280.4836         | 100    | 1.874       |  |  |  |  |  |

# Graph

Sample Name 30  
Application Name UV Only (Administrator)  
Method Name Analytical UV Only  
Configuration Name UV Only Config  
Version 17  
Data Instrument Name Detector  
Data Channel Name 159 Channel 1  
Notes  
Injection Number 8

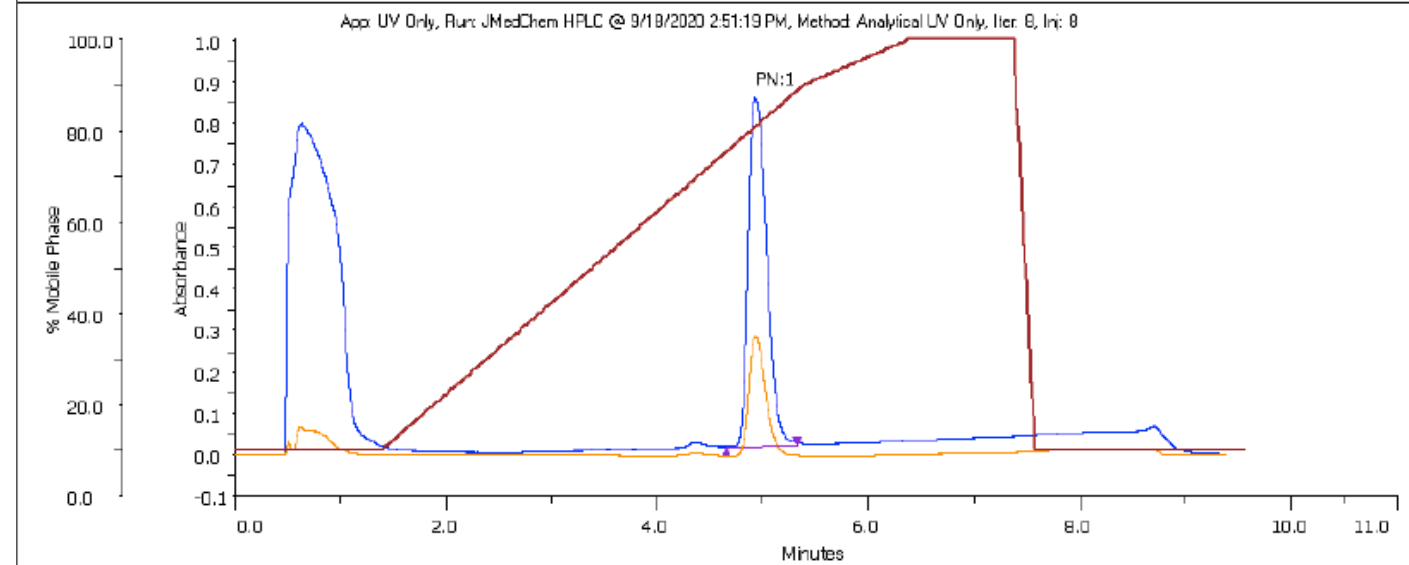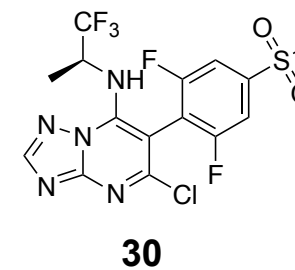

## Sample Table

| Sample Name | Retention Time (min) | Area (mAUmin x100) | Area % | Height (AU) |  |  |  |  |  |
|-------------|----------------------|--------------------|--------|-------------|--|--|--|--|--|
| 30          | 4.933                | 17037.6122         | 100    | 0.84        |  |  |  |  |  |

# Graph

Sample Name 71  
Application Name UV Only (Administrator)  
Method Name Analytical UV Only  
Configuration Name UV Only Config  
Version 17  
Data Instrument Name Detector  
Data Channel Name 159 Channel 1  
Notes  
Injection Number 9

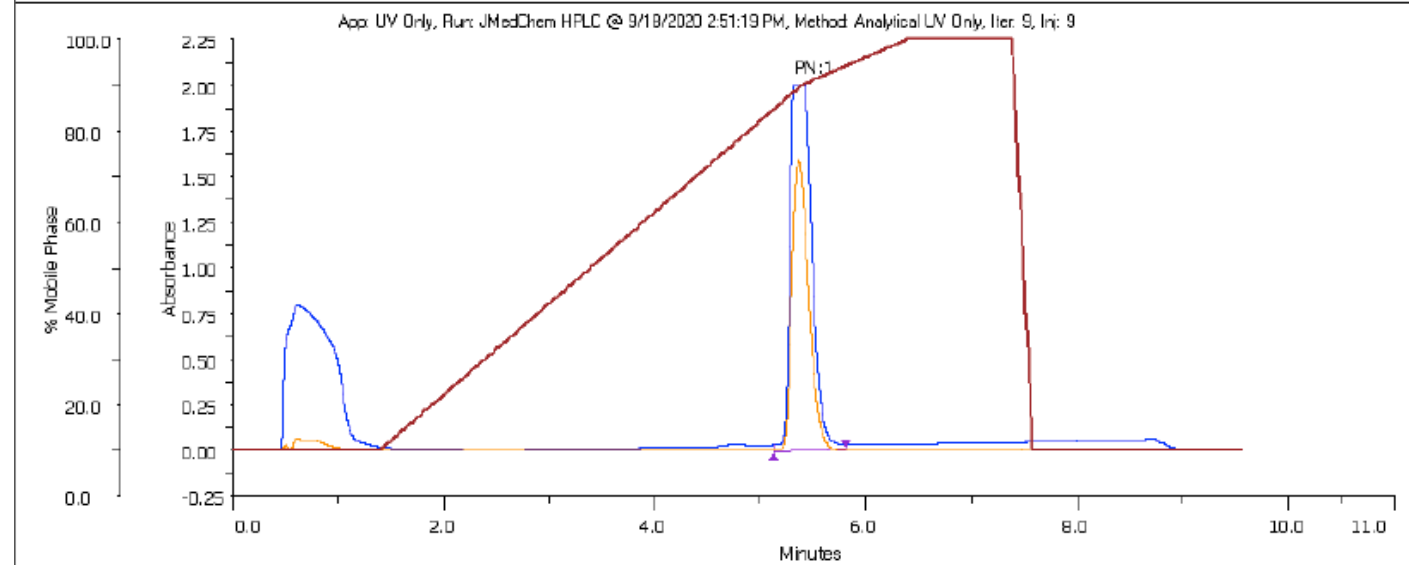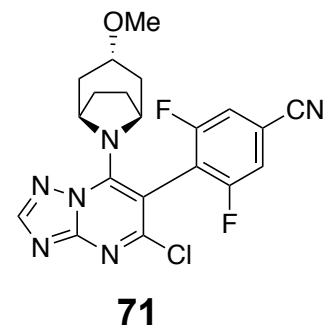

## Sample Table

| Sample Name | Retention Time (min) | Area (mAUmin x100) | Area % | Height (AU) |  |  |  |  |
|-------------|----------------------|--------------------|--------|-------------|--|--|--|--|
| 71          | 5.326                | 47603.6358         | 100    | 2.001       |  |  |  |  |

## Graph

Sample Name 29  
Application Name UV Only (Administrator)  
Method Name Analytical UV Only  
Configuration Name UV Only Config  
Version 17  
Data Instrument Name Detector  
Data Channel Name 159 Channel 1  
Notes  
Injection Number 10

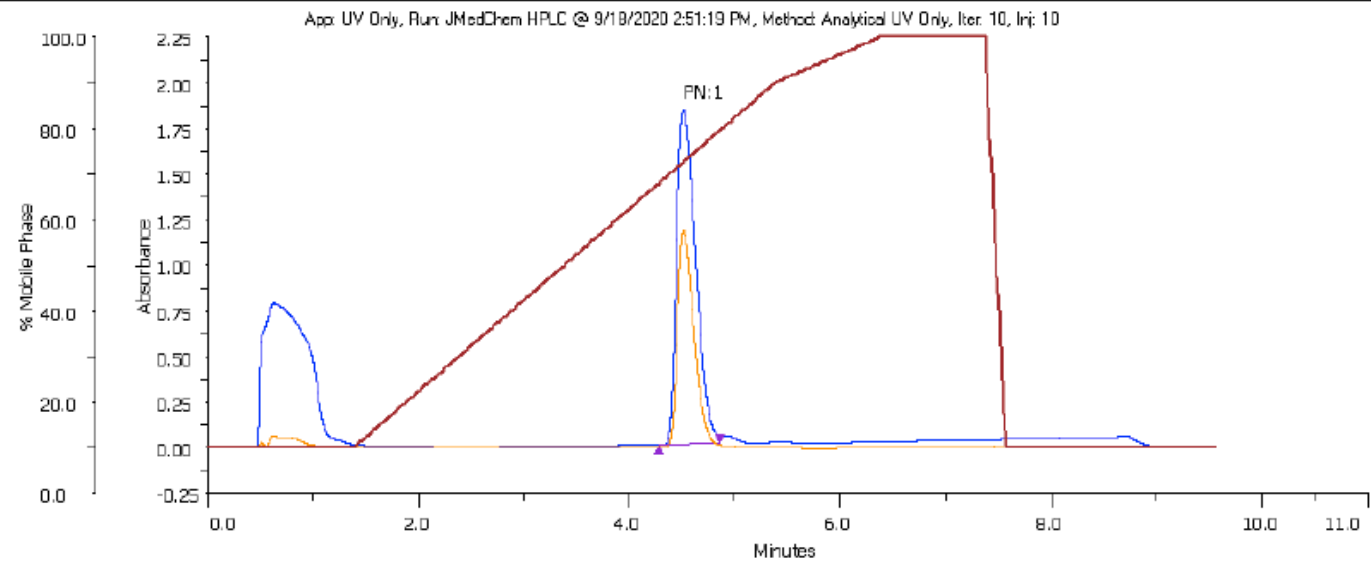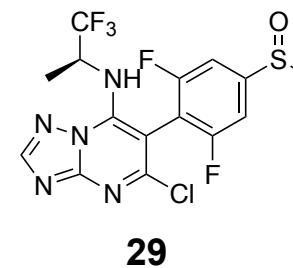

## Sample Table

| Sample Name | Retention Time (min) | Area (mAUmin x100) | Area % | Height (AU) |  |  |  |  |  |
|-------------|----------------------|--------------------|--------|-------------|--|--|--|--|--|
| 29          | 4.519                | 38639.9498         | 100    | 1.834       |  |  |  |  |  |



# Graph

Sample Name 67  
Application Name UV Only (Administrator)  
Method Name Analytical UV Only  
Configuration Name UV Only Config  
Version 17  
Data Instrument Name Detector  
Data Channel Name 159 Channel 1  
Notes  
Injection Number 15

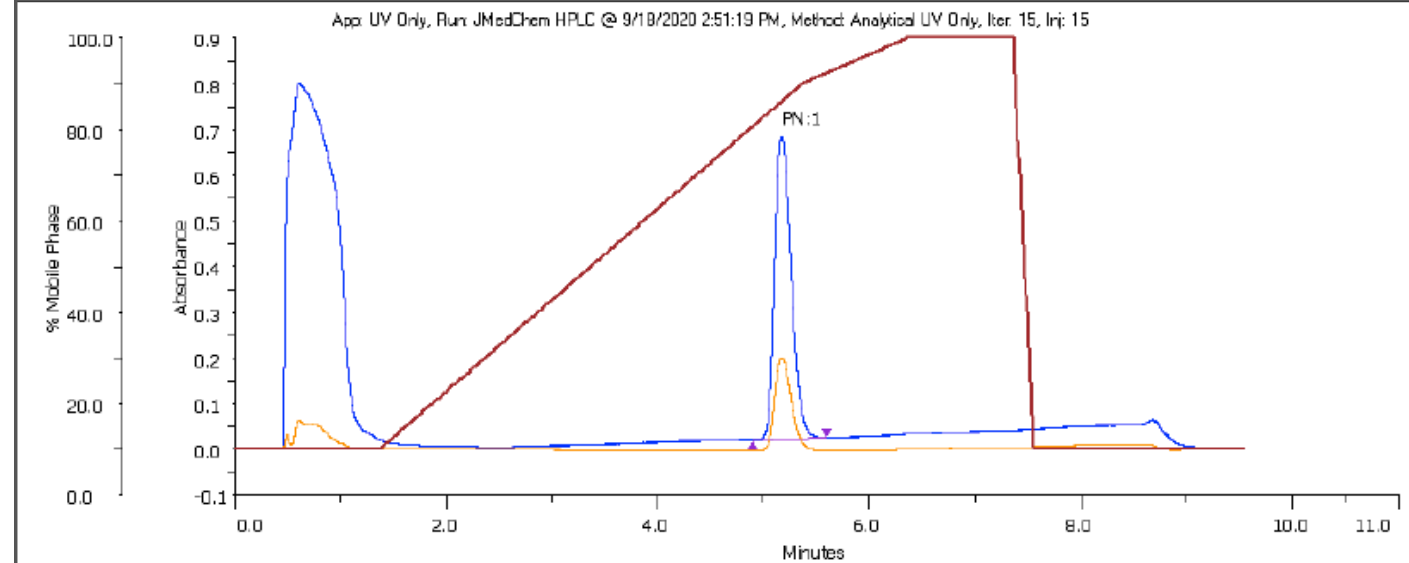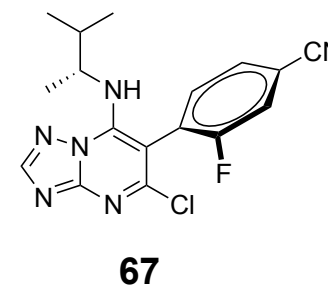

## Sample Table

| Sample Name | Retention Time (min) | Area (mAUmin x100) | Area % | Height (AU) |  |  |  |  |  |
|-------------|----------------------|--------------------|--------|-------------|--|--|--|--|--|
| 67          | 5.176                | 12156.9832         | 100    | 0.662       |  |  |  |  |  |

**Crystal Structure Report**  
**For The Ballatore Lab @ UCSD**

Maximilian Bernbeck  
*UCSD Crystallography Lab*  
5128 Urey Hall  
9500 Gilman Dr  
La Jolla, CA 92093-0358  
Tel: (858) 822-3871  
Fax: (858) 822-3872  
mbernbec@ucsd.edu

## Experimental Summary

The single crystal X-ray diffraction studies were carried out on a Bruker APEX II Ultra CCD diffractometer equipped with Mo  $K_{\alpha}$  radiation ( $\lambda = 0.71073$ ). Crystals of the subject compound were recrystallized from evaporating dichloromethane. A 0.346 x 0.209 x 0.068 mm colorless plate crystal was mounted on a Cryoloop with Paratone oil.

Data were collected in a nitrogen gas stream at 100(2) K using  $\phi$  and  $\omega$  scans. Crystal-to-detector distance was 40 mm using exposure time 4 seconds with a scan width of 0.8°. Data collection was 100.0 complete to 25.242° in  $\theta$ . A total of 30086 reflections were collected. 3902 reflections were found to be symmetry independent, with a  $R_{\text{int}}$  of 0.0438. Indexing and unit cell refinement indicated a **Primitive Monoclinic** lattice. The space group was found to be ***P2*<sub>1</sub>**. The data were integrated using the Bruker SAINT Software program and scaled using the SADABS software program. Solution by direct methods (SHELXT) produced a complete phasing model consistent with the proposed structure.

All nonhydrogen atoms were refined anisotropically by full-matrix least-squares (SHELXL-2014). All carbon bonded hydrogen atoms were placed using a riding model. Their positions were constrained relative to their parent atom using the appropriate HFIX command in SHELXL-2014.

Notes: Excellent data and refinement

**Compound 68 (CCDC : 1995770)**

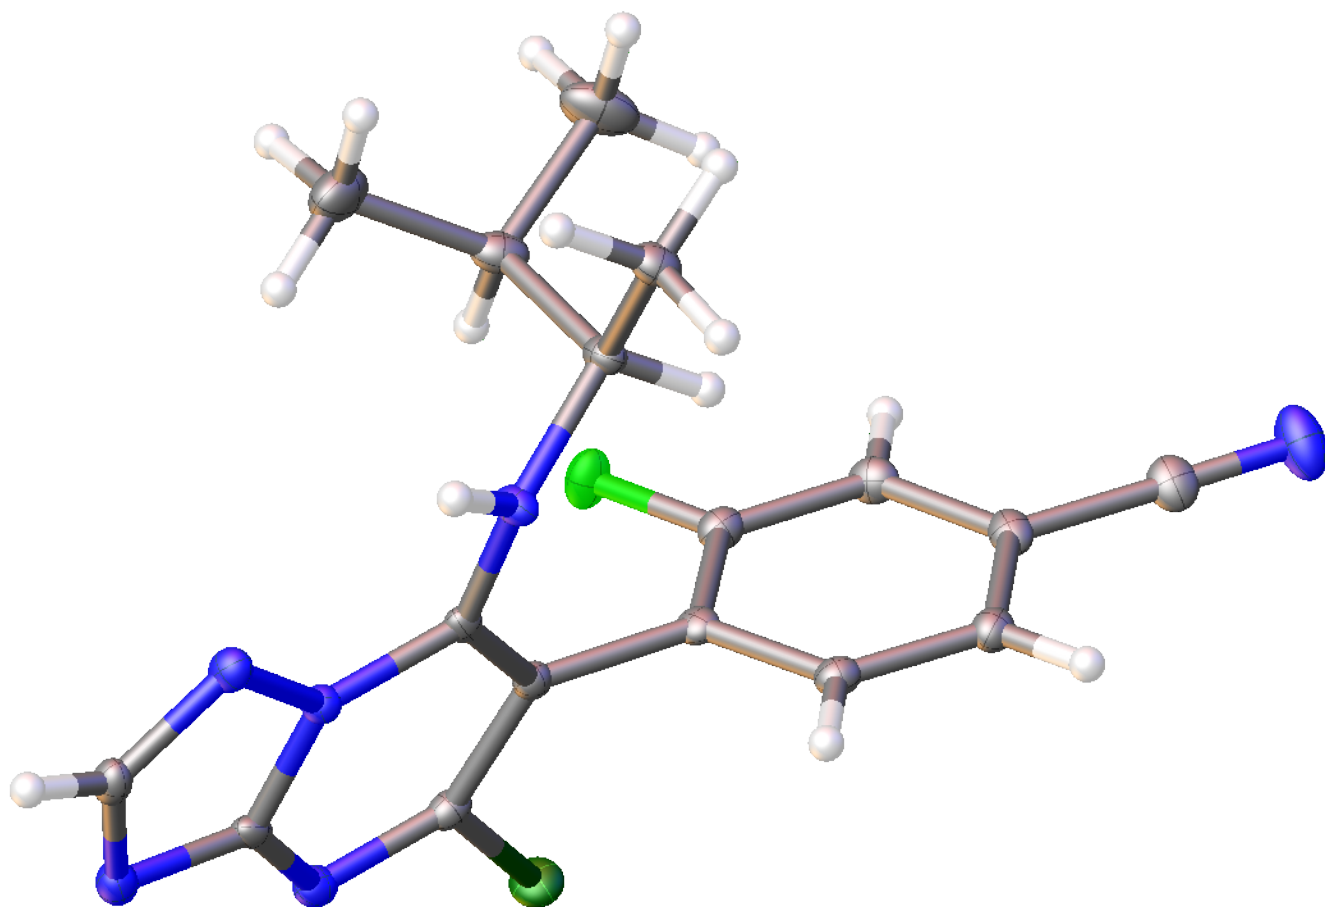

Table S-2. Crystal data and structure refinement for Ballatore\_TAL\_374\_2.

|                                   |                                             |                              |
|-----------------------------------|---------------------------------------------|------------------------------|
| Identification code               | ballatore_tal_374_2_0m                      |                              |
| Empirical formula                 | C17 H16 Cl F N6                             |                              |
| Formula weight                    | 358.81                                      |                              |
| Temperature                       | 100.15 K                                    |                              |
| Wavelength                        | 0.71073 Å                                   |                              |
| Crystal system                    | Monoclinic                                  |                              |
| Space group                       | P 1 21 1                                    |                              |
| Unit cell dimensions              | a = 10.0763(6) Å                            | $\alpha = 90^\circ$ .        |
|                                   | b = 6.6106(4) Å                             | $\beta = 105.610(2)^\circ$ . |
|                                   | c = 13.2029(9) Å                            | $\gamma = 90^\circ$ .        |
| Volume                            | 847.01(9) Å <sup>3</sup>                    |                              |
| Z                                 | 2                                           |                              |
| Density (calculated)              | 1.407 Mg/m <sup>3</sup>                     |                              |
| Absorption coefficient            | 0.249 mm <sup>-1</sup>                      |                              |
| F(000)                            | 372                                         |                              |
| Crystal size                      | 0.346 x 0.209 x 0.068 mm <sup>3</sup>       |                              |
| Theta range for data collection   | 1.601 to 27.517°.                           |                              |
| Index ranges                      | -13 ≤ h ≤ 13, -8 ≤ k ≤ 8, -17 ≤ l ≤ 17      |                              |
| Reflections collected             | 30086                                       |                              |
| Independent reflections           | 3902 [R(int) = 0.0438]                      |                              |
| Completeness to theta = 25.242°   | 100.0 %                                     |                              |
| Absorption correction             | Semi-empirical from equivalents             |                              |
| Max. and min. transmission        | 0.7456 and 0.5946                           |                              |
| Refinement method                 | Full-matrix least-squares on F <sup>2</sup> |                              |
| Data / restraints / parameters    | 3902 / 2 / 232                              |                              |
| Goodness-of-fit on F <sup>2</sup> | 1.067                                       |                              |
| Final R indices [I > 2σ(I)]       | R1 = 0.0254, wR2 = 0.0607                   |                              |
| R indices (all data)              | R1 = 0.0275, wR2 = 0.0620                   |                              |
| Absolute structure parameter      | 0.000(19)                                   |                              |
| Extinction coefficient            | n/a                                         |                              |
| Largest diff. peak and hole       | 0.280 and -0.188 e.Å <sup>-3</sup>          |                              |

Table S-3. Atomic coordinates ( $\times 10^4$ ) and equivalent isotropic displacement parameters ( $\text{\AA}^2 \times 10^3$ ) for Ballatore\_TAL\_374\_2.  $U(\text{eq})$  is defined as one third of the trace of the orthogonalized  $U^{ij}$  tensor.

|       | x        | y       | z       | U(eq) |
|-------|----------|---------|---------|-------|
| Cl(1) | 6697(1)  | 4428(1) | 5611(1) | 18(1) |
| F(1)  | 5512(1)  | 7291(2) | 3510(1) | 19(1) |
| N(1)  | 852(2)   | 2407(3) | 1238(1) | 26(1) |
| N(2)  | 9255(2)  | 4468(3) | 5609(1) | 14(1) |
| N(3)  | 11621(2) | 4436(3) | 5522(1) | 15(1) |
| N(4)  | 11164(1) | 4330(3) | 3726(1) | 14(1) |
| N(5)  | 9971(1)  | 4325(3) | 4031(1) | 11(1) |
| N(6)  | 8576(2)  | 4128(3) | 2334(1) | 12(1) |
| C(1)  | 1969(2)  | 2736(3) | 1692(2) | 18(1) |
| C(2)  | 3391(2)  | 3139(3) | 2239(2) | 15(1) |
| C(3)  | 3770(2)  | 5080(3) | 2625(2) | 16(1) |
| C(4)  | 5137(2)  | 5415(3) | 3138(1) | 14(1) |
| C(5)  | 6144(2)  | 3921(3) | 3287(1) | 12(1) |
| C(6)  | 5728(2)  | 1988(3) | 2896(1) | 14(1) |
| C(7)  | 4367(2)  | 1599(3) | 2374(1) | 15(1) |
| C(8)  | 7603(2)  | 4295(3) | 3868(1) | 12(1) |
| C(9)  | 8008(2)  | 4416(3) | 4976(1) | 13(1) |
| C(10) | 8662(2)  | 4255(3) | 3364(1) | 11(1) |
| C(11) | 10257(2) | 4404(3) | 5111(1) | 13(1) |
| C(12) | 12094(2) | 4387(4) | 4655(1) | 15(1) |
| C(13) | 7465(2)  | 4991(3) | 1478(1) | 13(1) |
| C(14) | 7392(2)  | 7304(3) | 1609(2) | 18(1) |
| C(15) | 8702(3)  | 8395(3) | 1566(2) | 28(1) |
| C(16) | 6128(3)  | 8165(4) | 808(2)  | 30(1) |
| C(17) | 7708(2)  | 4322(4) | 438(1)  | 17(1) |

Table S-4. Bond lengths [Å] and angles [°] for Ballatore\_TAL\_374\_2.

---

|                  |            |                   |            |
|------------------|------------|-------------------|------------|
| Cl(1)-C(9)       | 1.7443(16) | C(10)-N(6)-C(13)  | 125.51(16) |
| F(1)-C(4)        | 1.350(2)   | N(1)-C(1)-C(2)    | 178.4(2)   |
| N(1)-C(1)        | 1.144(3)   | C(3)-C(2)-C(1)    | 119.29(19) |
| N(2)-C(9)        | 1.309(2)   | C(7)-C(2)-C(1)    | 119.98(18) |
| N(2)-C(11)       | 1.345(2)   | C(7)-C(2)-C(3)    | 120.73(18) |
| N(3)-C(11)       | 1.335(2)   | C(4)-C(3)-C(2)    | 117.77(18) |
| N(3)-C(12)       | 1.354(2)   | F(1)-C(4)-C(3)    | 118.09(17) |
| N(4)-N(5)        | 1.3662(19) | F(1)-C(4)-C(5)    | 118.59(17) |
| N(4)-C(12)       | 1.328(2)   | C(3)-C(4)-C(5)    | 123.33(18) |
| N(5)-C(10)       | 1.376(2)   | C(4)-C(5)-C(6)    | 117.44(17) |
| N(5)-C(11)       | 1.378(2)   | C(4)-C(5)-C(8)    | 122.55(17) |
| N(6)-C(10)       | 1.342(2)   | C(6)-C(5)-C(8)    | 119.98(17) |
| N(6)-C(13)       | 1.475(2)   | C(7)-C(6)-C(5)    | 120.83(18) |
| C(1)-C(2)        | 1.445(3)   | C(6)-C(7)-C(2)    | 119.90(18) |
| C(2)-C(3)        | 1.395(3)   | C(9)-C(8)-C(5)    | 120.98(14) |
| C(2)-C(7)        | 1.393(3)   | C(10)-C(8)-C(5)   | 121.78(15) |
| C(3)-C(4)        | 1.379(3)   | C(10)-C(8)-C(9)   | 116.63(15) |
| C(4)-C(5)        | 1.392(3)   | N(2)-C(9)-Cl(1)   | 114.51(12) |
| C(5)-C(6)        | 1.399(3)   | N(2)-C(9)-C(8)    | 128.50(15) |
| C(5)-C(8)        | 1.484(2)   | C(8)-C(9)-Cl(1)   | 116.96(13) |
| C(6)-C(7)        | 1.383(3)   | N(5)-C(10)-C(8)   | 114.68(14) |
| C(8)-C(9)        | 1.412(2)   | N(6)-C(10)-N(5)   | 116.10(14) |
| C(8)-C(10)       | 1.401(2)   | N(6)-C(10)-C(8)   | 129.21(16) |
| C(13)-C(14)      | 1.542(3)   | N(2)-C(11)-N(5)   | 122.09(15) |
| C(13)-C(17)      | 1.524(2)   | N(3)-C(11)-N(2)   | 128.83(15) |
| C(14)-C(15)      | 1.518(3)   | N(3)-C(11)-N(5)   | 109.07(14) |
| C(14)-C(16)      | 1.530(3)   | N(4)-C(12)-N(3)   | 117.39(15) |
|                  |            | N(6)-C(13)-C(14)  | 110.28(16) |
| C(9)-N(2)-C(11)  | 113.96(13) | N(6)-C(13)-C(17)  | 107.78(15) |
| C(11)-N(3)-C(12) | 102.35(13) | C(17)-C(13)-C(14) | 114.38(17) |
| C(12)-N(4)-N(5)  | 100.71(13) | C(15)-C(14)-C(13) | 113.51(18) |
| N(4)-N(5)-C(10)  | 125.41(13) | C(15)-C(14)-C(16) | 111.58(19) |
| N(4)-N(5)-C(11)  | 110.47(13) | C(16)-C(14)-C(13) | 110.30(18) |
| C(10)-N(5)-C(11) | 124.12(14) |                   |            |

---

Table S-5. Anisotropic displacement parameters ( $\text{\AA}^2 \times 10^3$ ) for Ballatore\_TAL\_374\_2. The anisotropic displacement factor exponent takes the form:  $-2\pi^2 [ h^2 a^{*2} U^{11} + \dots + 2 h k a^* b^* U^{12} ]$

|       | U <sup>11</sup> | U <sup>22</sup> | U <sup>33</sup> | U <sup>23</sup> | U <sup>13</sup> | U <sup>12</sup> |
|-------|-----------------|-----------------|-----------------|-----------------|-----------------|-----------------|
| Cl(1) | 19(1)           | 24(1)           | 15(1)           | 0(1)            | 11(1)           | 0(1)            |
| F(1)  | 16(1)           | 13(1)           | 29(1)           | -4(1)           | 7(1)            | 0(1)            |
| N(1)  | 15(1)           | 38(1)           | 25(1)           | -11(1)          | 5(1)            | 0(1)            |
| N(2)  | 18(1)           | 13(1)           | 12(1)           | -1(1)           | 4(1)            | -1(1)           |
| N(3)  | 14(1)           | 14(1)           | 16(1)           | 0(1)            | 2(1)            | 0(1)            |
| N(4)  | 11(1)           | 14(1)           | 17(1)           | 1(1)            | 5(1)            | 1(1)            |
| N(5)  | 11(1)           | 12(1)           | 12(1)           | 0(1)            | 4(1)            | 1(1)            |
| N(6)  | 11(1)           | 17(1)           | 10(1)           | 1(1)            | 4(1)            | 2(1)            |
| C(1)  | 17(1)           | 23(1)           | 17(1)           | -4(1)           | 8(1)            | 1(1)            |
| C(2)  | 13(1)           | 21(1)           | 12(1)           | -1(1)           | 6(1)            | -1(1)           |
| C(3)  | 13(1)           | 18(1)           | 18(1)           | 1(1)            | 7(1)            | 3(1)            |
| C(4)  | 16(1)           | 13(1)           | 14(1)           | -1(1)           | 7(1)            | 0(1)            |
| C(5)  | 13(1)           | 15(1)           | 11(1)           | 2(1)            | 6(1)            | -1(1)           |
| C(6)  | 16(1)           | 13(1)           | 13(1)           | 1(1)            | 6(1)            | 1(1)            |
| C(7)  | 17(1)           | 15(1)           | 13(1)           | -1(1)           | 5(1)            | -2(1)           |
| C(8)  | 13(1)           | 10(1)           | 12(1)           | 0(1)            | 4(1)            | 0(1)            |
| C(9)  | 16(1)           | 11(1)           | 14(1)           | 0(1)            | 8(1)            | -1(1)           |
| C(10) | 12(1)           | 8(1)            | 12(1)           | 0(1)            | 2(1)            | 1(1)            |
| C(11) | 16(1)           | 10(1)           | 11(1)           | 2(1)            | 1(1)            | 0(1)            |
| C(12) | 11(1)           | 13(1)           | 18(1)           | 0(1)            | 3(1)            | 0(1)            |
| C(13) | 12(1)           | 16(1)           | 12(1)           | 2(1)            | 3(1)            | 1(1)            |
| C(14) | 24(1)           | 18(1)           | 13(1)           | 2(1)            | 6(1)            | 6(1)            |
| C(15) | 38(1)           | 18(1)           | 27(1)           | 1(1)            | 9(1)            | -6(1)           |
| C(16) | 35(1)           | 30(1)           | 22(1)           | 4(1)            | 5(1)            | 17(1)           |
| C(17) | 19(1)           | 18(1)           | 12(1)           | 0(1)            | 3(1)            | 3(1)            |



Table S-6. Hydrogen coordinates ( $\times 10^4$ ) and isotropic displacement parameters ( $\text{\AA}^2 \times 10^{-3}$ ) for Ballatore\_TAL\_374\_2.

|        | x        | y        | z        | U(eq) |
|--------|----------|----------|----------|-------|
| H(6)   | 9382(19) | 4050(40) | 2228(16) | 15    |
| H(3)   | 3109     | 6135     | 2537     | 19    |
| H(6A)  | 6388     | 930      | 2990     | 16    |
| H(7)   | 4098     | 283      | 2107     | 18    |
| H(12)  | 13053    | 4393     | 4709     | 17    |
| H(13)  | 6571     | 4399     | 1527     | 16    |
| H(14)  | 7261     | 7555     | 2323     | 22    |
| H(15A) | 9492     | 7790     | 2078     | 41    |
| H(15B) | 8631     | 9828     | 1735     | 41    |
| H(15C) | 8828     | 8272     | 858      | 41    |
| H(16A) | 6246     | 8027     | 99       | 45    |
| H(16B) | 6023     | 9598     | 961      | 45    |
| H(16C) | 5304     | 7421     | 853      | 45    |
| H(17A) | 8584     | 4877     | 376      | 25    |
| H(17B) | 6955     | 4817     | -145     | 25    |
| H(17C) | 7739     | 2842     | 414      | 25    |

**Compound 111 (CCDC: 2003391)**

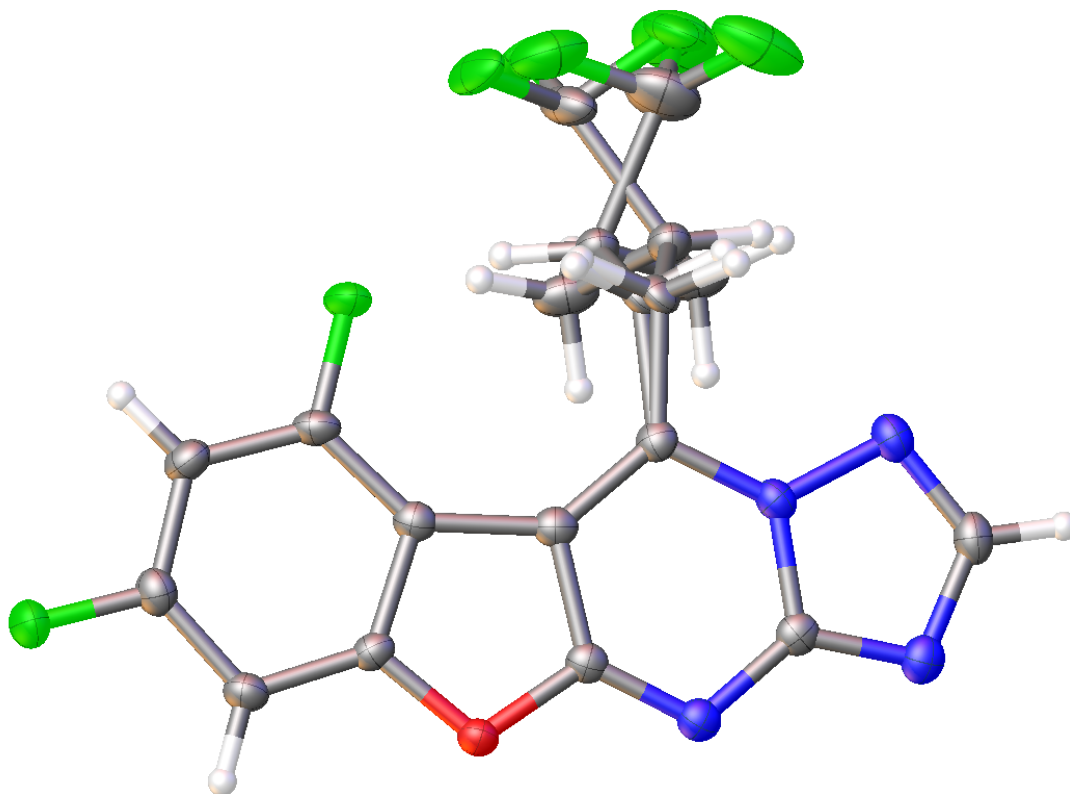

Table S-7. Crystal data and structure refinement for Ballatore\_BRL\_I\_205.

|                                   |                                             |                                |
|-----------------------------------|---------------------------------------------|--------------------------------|
| Identification code               | ballatore_brl_i_205_redo_0m_a               |                                |
| Empirical formula                 | C15 H9 F5 N4 O                              |                                |
| Formula weight                    | 356.26                                      |                                |
| Temperature                       | 100.0 K                                     |                                |
| Wavelength                        | 1.54178 Å                                   |                                |
| Crystal system                    | Triclinic                                   |                                |
| Space group                       | P-1                                         |                                |
| Unit cell dimensions              | a = 9.71530(10) Å                           | $\alpha = 94.8510(10)^\circ$ . |
|                                   | b = 10.56760(10) Å                          | $\beta = 92.2480(10)^\circ$ .  |
|                                   | c = 14.1191(2) Å                            | $\gamma = 98.7440(10)^\circ$ . |
| Volume                            | 1425.59(3) Å <sup>3</sup>                   |                                |
| Z                                 | 4                                           |                                |
| Density (calculated)              | 1.660 Mg/m <sup>3</sup>                     |                                |
| Absorption coefficient            | 1.358 mm <sup>-1</sup>                      |                                |
| F(000)                            | 720                                         |                                |
| Crystal size                      | 0.22 x 0.18 x 0.08 mm <sup>3</sup>          |                                |
| Theta range for data collection   | 3.146 to 66.663°.                           |                                |
| Index ranges                      | -11 ≤ h ≤ 11, -12 ≤ k ≤ 12, -16 ≤ l ≤ 16    |                                |
| Reflections collected             | 40759                                       |                                |
| Independent reflections           | 4785 [R(int) = 0.0301]                      |                                |
| Completeness to theta = 66.663°   | 94.9 %                                      |                                |
| Absorption correction             | Semi-empirical from equivalents             |                                |
| Max. and min. transmission        | 0.5201 and 0.4391                           |                                |
| Refinement method                 | Full-matrix least-squares on F <sup>2</sup> |                                |
| Data / restraints / parameters    | 4785 / 54 / 541                             |                                |
| Goodness-of-fit on F <sup>2</sup> | 1.136                                       |                                |
| Final R indices [I > 2σ(I)]       | R1 = 0.0458, wR2 = 0.1157                   |                                |
| R indices (all data)              | R1 = 0.0479, wR2 = 0.1169                   |                                |
| Extinction coefficient            | n/a                                         |                                |
| Largest diff. peak and hole       | 0.554 and -0.309 e.Å <sup>-3</sup>          |                                |

Table S-8. Atomic coordinates ( $\times 10^4$ ) and equivalent isotropic displacement parameters ( $\text{\AA}^2 \times 10^3$ ) for Ballatore\_BRL\_I\_205.  $U(\text{eq})$  is defined as one third of the trace of the orthogonalized  $U^{ij}$  tensor.

|        | x        | y       | z        | U(eq) |
|--------|----------|---------|----------|-------|
| F(1A)  | -4692(1) | 7745(1) | 2031(1)  | 30(1) |
| F(2A)  | -417(1)  | 6403(1) | 1393(1)  | 27(1) |
| O(1A)  | -1541(2) | 7147(1) | 4558(1)  | 19(1) |
| N(1A)  | 2472(2)  | 5921(2) | 5918(1)  | 23(1) |
| N(2A)  | 351(2)   | 6604(2) | 5362(1)  | 20(1) |
| N(3A)  | 2089(2)  | 5926(2) | 4356(1)  | 19(1) |
| N(4A)  | 3341(2)  | 5483(2) | 4462(2)  | 23(1) |
| C(1A)  | 3490(2)  | 5510(2) | 5397(2)  | 24(1) |
| C(2A)  | 1587(2)  | 6176(2) | 5251(2)  | 19(1) |
| C(3A)  | -272(2)  | 6739(2) | 4558(2)  | 18(1) |
| C(4A)  | -1975(2) | 7152(2) | 3611(2)  | 18(1) |
| C(5A)  | -3243(2) | 7473(2) | 3331(2)  | 21(1) |
| C(6A)  | -3482(2) | 7413(2) | 2360(2)  | 23(1) |
| C(7A)  | -2563(2) | 7055(2) | 1698(2)  | 24(1) |
| C(8A)  | -1323(2) | 6746(2) | 2031(2)  | 21(1) |
| C(9A)  | -975(2)  | 6779(2) | 3000(2)  | 19(1) |
| C(10A) | 156(2)   | 6500(2) | 3612(2)  | 19(1) |
| C(11A) | 1423(2)  | 6088(2) | 3512(2)  | 19(1) |
| F(3A)  | 1637(5)  | 5153(4) | 545(3)   | 43(1) |
| F(4A)  | 3352(6)  | 4316(5) | 1114(4)  | 41(1) |
| F(5A)  | 1453(4)  | 3108(3) | 646(2)   | 45(1) |
| C(12A) | 2240(20) | 5877(9) | 2644(11) | 19(2) |
| C(13A) | 2108(6)  | 4429(5) | 2357(4)  | 23(1) |
| C(14A) | 636(6)   | 3728(5) | 2225(4)  | 33(1) |
| C(15A) | 1938(8)  | 4231(6) | 1113(5)  | 32(1) |
| F(3B)  | 2266(6)  | 4818(6) | 737(3)   | 61(1) |
| F(4B)  | 2850(4)  | 3043(4) | 1147(3)  | 64(1) |
| F(5B)  | 4193(5)  | 4820(4) | 1545(4)  | 68(1) |
| C(12B) | 2010(20) | 5748(8) | 2569(10) | 19(2) |
| C(13B) | 1423(5)  | 4404(5) | 2089(4)  | 23(1) |
| C(14B) | 1753(6)  | 3326(4) | 2660(4)  | 33(1) |

|        |          |          |          |       |
|--------|----------|----------|----------|-------|
| C(15B) | 2868(11) | 4281(7)  | 1432(7)  | 48(2) |
| F(1C)  | 12809(1) | -954(1)  | 2253(1)  | 31(1) |
| F(2C)  | 8755(2)  | 158(2)   | 866(1)   | 33(1) |
| O(1B)  | 9263(2)  | 313(1)   | 4181(1)  | 20(1) |
| N(1B)  | 4954(2)  | 1600(2)  | 4798(1)  | 23(1) |
| N(2B)  | 7197(2)  | 920(2)   | 4637(1)  | 20(1) |
| N(3B)  | 5672(2)  | 1252(2)  | 3343(1)  | 19(1) |
| N(4B)  | 4399(2)  | 1644(2)  | 3211(1)  | 24(1) |
| C(1C)  | 4048(2)  | 1830(2)  | 4106(2)  | 25(1) |
| C(2C)  | 5988(2)  | 1242(2)  | 4309(2)  | 19(1) |
| C(3C)  | 7998(2)  | 651(2)   | 3957(2)  | 18(1) |
| C(4C)  | 9867(2)  | 72(2)    | 3328(2)  | 19(1) |
| C(5C)  | 11161(2) | -314(2)  | 3276(2)  | 21(1) |
| C(6C)  | 11577(2) | -534(2)  | 2361(2)  | 24(1) |
| C(7C)  | 10802(3) | -377(2)  | 1551(2)  | 26(1) |
| C(8C)  | 9524(2)  | 12(2)    | 1659(2)  | 23(1) |
| C(9C)  | 9004(2)  | 245(2)   | 2552(2)  | 19(1) |
| C(10C) | 7754(2)  | 635(2)   | 2952(2)  | 18(1) |
| C(11C) | 6509(2)  | 939(2)   | 2628(2)  | 18(1) |
| F(3D)  | 6369(2)  | 1651(3)  | -287(2)  | 46(1) |
| F(4D)  | 4247(3)  | 1488(2)  | 108(2)   | 48(1) |
| F(5D)  | 5411(2)  | 3354(2)  | -26(1)   | 45(1) |
| C(12D) | 5958(7)  | 954(9)   | 1629(2)  | 19(1) |
| C(13D) | 5995(3)  | 2309(3)  | 1313(2)  | 26(1) |
| C(14D) | 7430(4)  | 3131(3)  | 1465(2)  | 39(1) |
| C(15D) | 5523(5)  | 2210(4)  | 286(3)   | 33(1) |
| F(3C)  | 6509(18) | 926(19)  | -329(11) | 46(4) |
| F(4C)  | 4890(30) | 2060(30) | 88(18)   | 54(5) |
| F(5C)  | 6850(20) | 3040(16) | -297(11) | 66(4) |
| C(12C) | 6170(70) | 860(80)  | 1583(11) | 19(1) |
| C(13C) | 6720(30) | 2190(18) | 1174(13) | 26(1) |
| C(14C) | 6440(30) | 3435(18) | 1689(17) | 39(1) |
| C(15C) | 6230(40) | 2010(30) | 150(16)  | 33(1) |

---

Table S-9. Bond lengths [Å] and angles [°] for Ballatore\_BRL\_I\_205.

|               |          |               |           |
|---------------|----------|---------------|-----------|
| F(1A)-C(6A)   | 1.353(3) | C(13A)-C(15A) | 1.748(7)  |
| F(2A)-C(8A)   | 1.350(2) | C(14A)-H(14G) | 0.9800    |
| O(1A)-C(3A)   | 1.367(3) | C(14A)-H(14I) | 0.9800    |
| O(1A)-C(4A)   | 1.386(3) | C(14A)-H(14H) | 0.9800    |
| N(1A)-C(1A)   | 1.356(3) | F(3B)-C(15B)  | 1.334(12) |
| N(1A)-C(2A)   | 1.322(3) | F(4B)-C(15B)  | 1.333(8)  |
| N(2A)-C(2A)   | 1.356(3) | F(5B)-C(15B)  | 1.324(11) |
| N(2A)-C(3A)   | 1.294(3) | C(12B)-H(12C) | 0.9900    |
| N(3A)-N(4A)   | 1.375(3) | C(12B)-H(12D) | 0.9900    |
| N(3A)-C(2A)   | 1.392(3) | C(12B)-C(13B) | 1.536(7)  |
| N(3A)-C(11A)  | 1.369(3) | C(13B)-H(13B) | 1.0000    |
| N(4A)-C(1A)   | 1.320(3) | C(13B)-C(14B) | 1.515(7)  |
| C(1A)-H(1A)   | 0.9500   | C(13B)-C(15B) | 1.728(8)  |
| C(3A)-C(10A)  | 1.428(3) | C(14B)-H(14D) | 0.9800    |
| C(4A)-C(5A)   | 1.378(3) | C(14B)-H(14E) | 0.9800    |
| C(4A)-C(9A)   | 1.403(3) | C(14B)-H(14F) | 0.9800    |
| C(5A)-H(5A)   | 0.9500   | F(1C)-C(6C)   | 1.348(3)  |
| C(5A)-C(6A)   | 1.376(4) | F(2C)-C(8C)   | 1.354(3)  |
| C(6A)-C(7A)   | 1.386(3) | O(1B)-C(3C)   | 1.364(3)  |
| C(7A)-H(7A)   | 0.9500   | O(1B)-C(4C)   | 1.382(3)  |
| C(7A)-C(8A)   | 1.372(3) | N(1B)-C(1C)   | 1.352(3)  |
| C(8A)-C(9A)   | 1.392(3) | N(1B)-C(2C)   | 1.325(3)  |
| C(9A)-C(10A)  | 1.452(3) | N(2B)-C(2C)   | 1.348(3)  |
| C(10A)-C(11A) | 1.375(3) | N(2B)-C(3C)   | 1.299(3)  |
| C(11A)-C(12A) | 1.502(7) | N(3B)-N(4B)   | 1.374(3)  |
| C(11A)-C(12B) | 1.504(6) | N(3B)-C(2C)   | 1.387(3)  |
| F(3A)-C(15A)  | 1.371(8) | N(3B)-C(11C)  | 1.372(3)  |
| F(4A)-C(15A)  | 1.363(9) | N(4B)-C(1C)   | 1.328(3)  |
| F(5A)-C(15A)  | 1.318(7) | C(1C)-H(1C)   | 0.9500    |
| C(12A)-H(12F) | 0.9900   | C(3C)-C(10C)  | 1.427(3)  |
| C(12A)-H(12E) | 0.9900   | C(4C)-C(5C)   | 1.383(3)  |
| C(12A)-C(13A) | 1.535(8) | C(4C)-C(9C)   | 1.394(3)  |
| C(13A)-H(13A) | 1.0000   | C(5C)-H(5C)   | 0.9500    |
| C(13A)-C(14A) | 1.505(8) | C(5C)-C(6C)   | 1.380(3)  |

|                   |            |                     |            |
|-------------------|------------|---------------------|------------|
| C(6C)-C(7C)       | 1.380(4)   | C(11A)-N(3A)-N(4A)  | 126.20(19) |
| C(7C)-H(7C)       | 0.9500     | C(11A)-N(3A)-C(2A)  | 124.84(19) |
| C(7C)-C(8C)       | 1.376(3)   | C(1A)-N(4A)-N(3A)   | 101.24(18) |
| C(8C)-C(9C)       | 1.393(3)   | N(1A)-C(1A)-H(1A)   | 121.2      |
| C(9C)-C(10C)      | 1.459(3)   | N(4A)-C(1A)-N(1A)   | 117.7(2)   |
| C(10C)-C(11C)     | 1.370(3)   | N(4A)-C(1A)-H(1A)   | 121.2      |
| C(11C)-C(12D)     | 1.490(4)   | N(1A)-C(2A)-N(2A)   | 128.2(2)   |
| C(11C)-C(12C)     | 1.491(10)  | N(1A)-C(2A)-N(3A)   | 109.93(19) |
| F(3D)-C(15D)      | 1.340(4)   | N(2A)-C(2A)-N(3A)   | 121.8(2)   |
| F(4D)-C(15D)      | 1.356(5)   | O(1A)-C(3A)-C(10A)  | 111.39(19) |
| F(5D)-C(15D)      | 1.340(4)   | N(2A)-C(3A)-O(1A)   | 119.16(19) |
| C(12D)-H(12A)     | 0.9900     | N(2A)-C(3A)-C(10A)  | 129.4(2)   |
| C(12D)-H(12B)     | 0.9900     | O(1A)-C(4A)-C(9A)   | 111.37(19) |
| C(12D)-C(13D)     | 1.531(9)   | C(5A)-C(4A)-O(1A)   | 122.94(19) |
| C(13D)-H(13D)     | 1.0000     | C(5A)-C(4A)-C(9A)   | 125.7(2)   |
| C(13D)-C(14D)     | 1.523(4)   | C(4A)-C(5A)-H(5A)   | 123.0      |
| C(13D)-C(15D)     | 1.494(5)   | C(6A)-C(5A)-C(4A)   | 114.1(2)   |
| C(14D)-H(14A)     | 0.9800     | C(6A)-C(5A)-H(5A)   | 123.0      |
| C(14D)-H(14B)     | 0.9800     | F(1A)-C(6A)-C(5A)   | 117.6(2)   |
| C(14D)-H(14C)     | 0.9800     | F(1A)-C(6A)-C(7A)   | 117.8(2)   |
| F(3C)-C(15C)      | 1.35(3)    | C(5A)-C(6A)-C(7A)   | 124.6(2)   |
| F(4C)-C(15C)      | 1.31(4)    | C(6A)-C(7A)-H(7A)   | 121.0      |
| F(5C)-C(15C)      | 1.37(3)    | C(8A)-C(7A)-C(6A)   | 117.9(2)   |
| C(12C)-H(12G)     | 0.9900     | C(8A)-C(7A)-H(7A)   | 121.0      |
| C(12C)-H(12H)     | 0.9900     | F(2A)-C(8A)-C(7A)   | 118.4(2)   |
| C(12C)-C(13C)     | 1.59(9)    | F(2A)-C(8A)-C(9A)   | 119.5(2)   |
| C(13C)-H(13C)     | 1.0000     | C(7A)-C(8A)-C(9A)   | 122.1(2)   |
| C(13C)-C(14C)     | 1.517(11)  | C(4A)-C(9A)-C(10A)  | 105.91(19) |
| C(13C)-C(15C)     | 1.492(11)  | C(8A)-C(9A)-C(4A)   | 115.6(2)   |
| C(14C)-H(14J)     | 0.9800     | C(8A)-C(9A)-C(10A)  | 138.5(2)   |
| C(14C)-H(14K)     | 0.9800     | C(3A)-C(10A)-C(9A)  | 104.91(19) |
| C(14C)-H(14L)     | 0.9800     | C(11A)-C(10A)-C(3A) | 117.3(2)   |
| C(3A)-O(1A)-C(4A) | 106.40(16) | C(11A)-C(10A)-C(9A) | 137.8(2)   |
| C(2A)-N(1A)-C(1A) | 102.18(19) | N(3A)-C(11A)-C(10A) | 114.0(2)   |
| C(3A)-N(2A)-C(2A) | 112.59(19) | N(3A)-C(11A)-C(12A) | 115.0(11)  |
| N(4A)-N(3A)-C(2A) | 108.96(19) | N(3A)-C(11A)-C(12B) | 121.8(9)   |

|                      |           |                      |            |
|----------------------|-----------|----------------------|------------|
| C(10A)-C(11A)-C(12A) | 130.8(11) | C(14B)-C(13B)-C(15B) | 90.3(4)    |
| C(10A)-C(11A)-C(12B) | 124.1(9)  | C(15B)-C(13B)-H(13B) | 117.8      |
| C(11A)-C(12A)-H(12F) | 109.8     | C(13B)-C(14B)-H(14D) | 109.5      |
| C(11A)-C(12A)-H(12E) | 109.8     | C(13B)-C(14B)-H(14E) | 109.5      |
| C(11A)-C(12A)-C(13A) | 109.3(6)  | C(13B)-C(14B)-H(14F) | 109.5      |
| H(12F)-C(12A)-H(12E) | 108.3     | H(14D)-C(14B)-H(14E) | 109.5      |
| C(13A)-C(12A)-H(12F) | 109.8     | H(14D)-C(14B)-H(14F) | 109.5      |
| C(13A)-C(12A)-H(12E) | 109.8     | H(14E)-C(14B)-H(14F) | 109.5      |
| C(12A)-C(13A)-H(13A) | 116.5     | F(3B)-C(15B)-C(13B)  | 88.8(6)    |
| C(12A)-C(13A)-C(15A) | 106.6(8)  | F(4B)-C(15B)-F(3B)   | 108.0(8)   |
| C(14A)-C(13A)-C(12A) | 114.7(9)  | F(4B)-C(15B)-C(13B)  | 108.0(6)   |
| C(14A)-C(13A)-H(13A) | 116.5     | F(5B)-C(15B)-F(3B)   | 108.3(7)   |
| C(14A)-C(13A)-C(15A) | 80.3(4)   | F(5B)-C(15B)-F(4B)   | 107.0(7)   |
| C(15A)-C(13A)-H(13A) | 116.5     | F(5B)-C(15B)-C(13B)  | 133.5(6)   |
| C(13A)-C(14A)-H(14G) | 109.5     | C(3C)-O(1B)-C(4C)    | 106.34(17) |
| C(13A)-C(14A)-H(14I) | 109.5     | C(2C)-N(1B)-C(1C)    | 102.62(19) |
| C(13A)-C(14A)-H(14H) | 109.5     | C(3C)-N(2B)-C(2C)    | 112.48(19) |
| H(14G)-C(14A)-H(14I) | 109.5     | N(4B)-N(3B)-C(2C)    | 109.63(18) |
| H(14G)-C(14A)-H(14H) | 109.5     | C(11C)-N(3B)-N(4B)   | 125.0(2)   |
| H(14I)-C(14A)-H(14H) | 109.5     | C(11C)-N(3B)-C(2C)   | 125.37(19) |
| F(3A)-C(15A)-C(13A)  | 124.9(5)  | C(1C)-N(4B)-N(3B)    | 100.83(19) |
| F(4A)-C(15A)-F(3A)   | 104.4(6)  | N(1B)-C(1C)-H(1C)    | 121.3      |
| F(4A)-C(15A)-C(13A)  | 87.7(5)   | N(4B)-C(1C)-N(1B)    | 117.5(2)   |
| F(5A)-C(15A)-F(3A)   | 106.7(6)  | N(4B)-C(1C)-H(1C)    | 121.3      |
| F(5A)-C(15A)-F(4A)   | 104.9(5)  | N(1B)-C(2C)-N(2B)    | 128.7(2)   |
| F(5A)-C(15A)-C(13A)  | 121.8(5)  | N(1B)-C(2C)-N(3B)    | 109.5(2)   |
| C(11A)-C(12B)-H(12C) | 108.4     | N(2B)-C(2C)-N(3B)    | 121.81(19) |
| C(11A)-C(12B)-H(12D) | 108.4     | O(1B)-C(3C)-C(10C)   | 111.55(18) |
| C(11A)-C(12B)-C(13B) | 115.3(5)  | N(2B)-C(3C)-O(1B)    | 119.1(2)   |
| H(12C)-C(12B)-H(12D) | 107.5     | N(2B)-C(3C)-C(10C)   | 129.3(2)   |
| C(13B)-C(12B)-H(12C) | 108.4     | O(1B)-C(4C)-C(5C)    | 122.7(2)   |
| C(13B)-C(12B)-H(12D) | 108.4     | O(1B)-C(4C)-C(9C)    | 111.73(19) |
| C(12B)-C(13B)-H(13B) | 117.8     | C(5C)-C(4C)-C(9C)    | 125.5(2)   |
| C(12B)-C(13B)-C(15B) | 94.5(6)   | C(4C)-C(5C)-H(5C)    | 122.8      |
| C(14B)-C(13B)-C(12B) | 113.3(9)  | C(6C)-C(5C)-C(4C)    | 114.4(2)   |
| C(14B)-C(13B)-H(13B) | 117.8     | C(6C)-C(5C)-H(5C)    | 122.8      |



|                      |            |                      |          |
|----------------------|------------|----------------------|----------|
| F(1C)-C(6C)-C(5C)    | 117.7(2)   | C(13D)-C(14D)-H(14C) | 109.5    |
| F(1C)-C(6C)-C(7C)    | 118.0(2)   | H(14A)-C(14D)-H(14B) | 109.5    |
| C(7C)-C(6C)-C(5C)    | 124.3(2)   | H(14A)-C(14D)-H(14C) | 109.5    |
| C(6C)-C(7C)-H(7C)    | 121.0      | H(14B)-C(14D)-H(14C) | 109.5    |
| C(8C)-C(7C)-C(6C)    | 118.1(2)   | F(3D)-C(15D)-F(4D)   | 105.3(3) |
| C(8C)-C(7C)-H(7C)    | 121.0      | F(3D)-C(15D)-C(13D)  | 113.0(4) |
| F(2C)-C(8C)-C(7C)    | 118.3(2)   | F(4D)-C(15D)-C(13D)  | 112.3(3) |
| F(2C)-C(8C)-C(9C)    | 119.7(2)   | F(5D)-C(15D)-F(3D)   | 107.5(3) |
| C(7C)-C(8C)-C(9C)    | 122.0(2)   | F(5D)-C(15D)-F(4D)   | 105.5(4) |
| C(4C)-C(9C)-C(10C)   | 105.87(19) | F(5D)-C(15D)-C(13D)  | 112.8(3) |
| C(8C)-C(9C)-C(4C)    | 115.7(2)   | C(11C)-C(12C)-H(12G) | 109.5    |
| C(8C)-C(9C)-C(10C)   | 138.4(2)   | C(11C)-C(12C)-H(12H) | 109.5    |
| C(3C)-C(10C)-C(9C)   | 104.51(19) | C(11C)-C(12C)-C(13C) | 111(5)   |
| C(11C)-C(10C)-C(3C)  | 117.6(2)   | H(12G)-C(12C)-H(12H) | 108.1    |
| C(11C)-C(10C)-C(9C)  | 137.9(2)   | C(13C)-C(12C)-H(12G) | 109.5    |
| N(3B)-C(11C)-C(12D)  | 117.4(3)   | C(13C)-C(12C)-H(12H) | 109.5    |
| N(3B)-C(11C)-C(12C)  | 127(2)     | C(12C)-C(13C)-H(13C) | 106.0    |
| C(10C)-C(11C)-N(3B)  | 113.4(2)   | C(14C)-C(13C)-C(12C) | 119(2)   |
| C(10C)-C(11C)-C(12D) | 129.2(3)   | C(14C)-C(13C)-H(13C) | 106.0    |
| C(10C)-C(11C)-C(12C) | 120(2)     | C(15C)-C(13C)-C(12C) | 105(2)   |
| C(11C)-C(12D)-H(12A) | 108.8      | C(15C)-C(13C)-H(13C) | 106.0    |
| C(11C)-C(12D)-H(12B) | 108.8      | C(15C)-C(13C)-C(14C) | 114(2)   |
| C(11C)-C(12D)-C(13D) | 113.6(5)   | C(13C)-C(14C)-H(14J) | 109.5    |
| H(12A)-C(12D)-H(12B) | 107.7      | C(13C)-C(14C)-H(14K) | 109.5    |
| C(13D)-C(12D)-H(12A) | 108.8      | C(13C)-C(14C)-H(14L) | 109.5    |
| C(13D)-C(12D)-H(12B) | 108.8      | H(14J)-C(14C)-H(14K) | 109.5    |
| C(12D)-C(13D)-H(13D) | 108.2      | H(14J)-C(14C)-H(14L) | 109.5    |
| C(14D)-C(13D)-C(12D) | 113.2(3)   | H(14K)-C(14C)-H(14L) | 109.5    |
| C(14D)-C(13D)-H(13D) | 108.2      | F(3C)-C(15C)-F(5C)   | 108(3)   |
| C(15D)-C(13D)-C(12D) | 109.1(3)   | F(3C)-C(15C)-C(13C)  | 114(2)   |
| C(15D)-C(13D)-H(13D) | 108.2      | F(4C)-C(15C)-F(3C)   | 111(2)   |
| C(15D)-C(13D)-C(14D) | 109.7(3)   | F(4C)-C(15C)-F(5C)   | 106(3)   |
| C(13D)-C(14D)-H(14A) | 109.5      | F(4C)-C(15C)-C(13C)  | 109(3)   |
| C(13D)-C(14D)-H(14B) | 109.5      | F(5C)-C(15C)-C(13C)  | 109(2)   |

---

Symmetry transformations used to generate equivalent atoms:

Table S-10. Anisotropic displacement parameters ( $\text{\AA}^2 \times 10^3$ ) for Ballatore\_BRL\_I\_205. The anisotropic displacement factor exponent takes the form:  $-2\pi^2 [h^2 a^{*2} U^{11} + \dots + 2 h k a^* b^* U^{12}]$

|        | U <sup>11</sup> | U <sup>22</sup> | U <sup>33</sup> | U <sup>23</sup> | U <sup>13</sup> | U <sup>12</sup> |
|--------|-----------------|-----------------|-----------------|-----------------|-----------------|-----------------|
| F(1A)  | 26(1)           | 42(1)           | 26(1)           | 3(1)            | -1(1)           | 16(1)           |
| F(2A)  | 30(1)           | 37(1)           | 18(1)           | 0(1)            | 6(1)            | 16(1)           |
| O(1A)  | 20(1)           | 21(1)           | 18(1)           | 0(1)            | 2(1)            | 6(1)            |
| N(1A)  | 24(1)           | 20(1)           | 24(1)           | 1(1)            | -2(1)           | 2(1)            |
| N(2A)  | 21(1)           | 18(1)           | 22(1)           | 0(1)            | 1(1)            | 2(1)            |
| N(3A)  | 18(1)           | 18(1)           | 23(1)           | 2(1)            | 2(1)            | 4(1)            |
| N(4A)  | 20(1)           | 21(1)           | 29(1)           | 3(1)            | 1(1)            | 5(1)            |
| C(1A)  | 21(1)           | 21(1)           | 29(2)           | 4(1)            | -4(1)           | 3(1)            |
| C(2A)  | 22(1)           | 14(1)           | 20(1)           | 0(1)            | 0(1)            | 1(1)            |
| C(3A)  | 20(1)           | 14(1)           | 20(1)           | 0(1)            | 2(1)            | 2(1)            |
| C(4A)  | 23(1)           | 16(1)           | 16(1)           | 1(1)            | 2(1)            | 3(1)            |
| C(5A)  | 22(1)           | 20(1)           | 21(1)           | 1(1)            | 4(1)            | 5(1)            |
| C(6A)  | 22(1)           | 22(1)           | 27(1)           | 3(1)            | -1(1)           | 6(1)            |
| C(7A)  | 31(1)           | 24(1)           | 17(1)           | 2(1)            | 1(1)            | 7(1)            |
| C(8A)  | 26(1)           | 20(1)           | 19(1)           | 1(1)            | 7(1)            | 6(1)            |
| C(9A)  | 20(1)           | 15(1)           | 21(1)           | 2(1)            | 3(1)            | 3(1)            |
| C(10A) | 21(1)           | 16(1)           | 20(1)           | 1(1)            | 3(1)            | 2(1)            |
| C(11A) | 21(1)           | 17(1)           | 19(1)           | 4(1)            | 1(1)            | 3(1)            |
| F(3A)  | 65(3)           | 58(2)           | 18(2)           | 12(2)           | 6(2)            | 43(2)           |
| F(4A)  | 37(3)           | 56(3)           | 38(3)           | 12(2)           | 23(2)           | 28(2)           |
| F(5A)  | 81(3)           | 41(2)           | 17(2)           | -14(1)          | 0(2)            | 27(2)           |
| C(12A) | 12(5)           | 21(2)           | 22(2)           | 4(1)            | 4(3)            | 2(2)            |
| C(13A) | 25(3)           | 26(2)           | 20(3)           | -2(2)           | 0(2)            | 8(2)            |
| C(14A) | 46(2)           | 26(2)           | 25(2)           | -3(1)           | 11(2)           | 2(2)            |
| C(15A) | 39(4)           | 36(4)           | 28(4)           | 11(3)           | 15(3)           | 22(3)           |
| F(3B)  | 75(4)           | 82(4)           | 29(3)           | -3(2)           | 14(3)           | 22(3)           |
| F(4B)  | 72(3)           | 56(2)           | 64(3)           | -22(2)          | 16(2)           | 24(2)           |
| F(5B)  | 52(3)           | 64(3)           | 88(3)           | -14(2)          | 34(2)           | 16(2)           |
| C(12B) | 12(5)           | 21(2)           | 22(2)           | 4(1)            | 4(3)            | 2(2)            |
| C(13B) | 25(3)           | 26(2)           | 20(3)           | -2(2)           | 0(2)            | 8(2)            |
| C(14B) | 46(2)           | 26(2)           | 25(2)           | -3(1)           | 11(2)           | 2(2)            |
| C(15B) | 52(6)           | 40(4)           | 54(6)           | -7(3)           | 19(5)           | 16(4)           |

|        |         |        |        |       |        |        |
|--------|---------|--------|--------|-------|--------|--------|
| F(1C)  | 22(1)   | 33(1)  | 40(1)  | 0(1)  | 5(1)   | 11(1)  |
| F(2C)  | 33(1)   | 53(1)  | 16(1)  | 1(1)  | 2(1)   | 18(1)  |
| O(1B)  | 22(1)   | 22(1)  | 16(1)  | 2(1)  | -1(1)  | 4(1)   |
| N(1B)  | 23(1)   | 21(1)  | 23(1)  | -2(1) | 6(1)   | 1(1)   |
| N(2B)  | 23(1)   | 19(1)  | 16(1)  | 2(1)  | 3(1)   | 0(1)   |
| N(3B)  | 18(1)   | 20(1)  | 19(1)  | -1(1) | 1(1)   | 2(1)   |
| N(4B)  | 19(1)   | 27(1)  | 25(1)  | -2(1) | 2(1)   | 6(1)   |
| C(1C)  | 20(1)   | 25(1)  | 28(1)  | -5(1) | 7(1)   | 2(1)   |
| C(2C)  | 24(1)   | 17(1)  | 16(1)  | 0(1)  | 4(1)   | -1(1)  |
| C(3C)  | 20(1)   | 14(1)  | 18(1)  | 1(1)  | -1(1)  | 1(1)   |
| C(4C)  | 23(1)   | 16(1)  | 18(1)  | 1(1)  | 3(1)   | 1(1)   |
| C(5C)  | 21(1)   | 20(1)  | 24(1)  | 3(1)  | -3(1)  | 3(1)   |
| C(6C)  | 18(1)   | 21(1)  | 34(2)  | 1(1)  | 4(1)   | 5(1)   |
| C(7C)  | 27(1)   | 28(1)  | 24(1)  | -1(1) | 8(1)   | 5(1)   |
| C(8C)  | 24(1)   | 27(1)  | 17(1)  | 2(1)  | 0(1)   | 6(1)   |
| C(9C)  | 19(1)   | 17(1)  | 18(1)  | 1(1)  | 1(1)   | 2(1)   |
| C(10C) | 22(1)   | 16(1)  | 16(1)  | 1(1)  | 3(1)   | 1(1)   |
| C(11C) | 21(1)   | 16(1)  | 18(1)  | 1(1)  | 3(1)   | 1(1)   |
| F(3D)  | 66(1)   | 59(2)  | 19(1)  | -2(1) | 3(1)   | 34(1)  |
| F(4D)  | 50(1)   | 58(1)  | 36(1)  | 6(1)  | -17(1) | 11(1)  |
| F(5D)  | 66(1)   | 47(1)  | 28(1)  | 12(1) | 3(1)   | 27(1)  |
| C(12D) | 19(3)   | 23(2)  | 17(1)  | -3(1) | 0(1)   | 7(2)   |
| C(13D) | 37(2)   | 28(1)  | 17(1)  | 4(1)  | 1(1)   | 12(1)  |
| C(14D) | 57(2)   | 27(2)  | 31(2)  | 6(1)  | 1(2)   | -1(1)  |
| C(15D) | 42(2)   | 35(2)  | 26(2)  | 3(1)  | -2(2)  | 19(2)  |
| F(3C)  | 63(9)   | 45(5)  | 32(7)  | -7(5) | 4(6)   | 17(6)  |
| F(4C)  | 47(5)   | 71(13) | 48(10) | 0(10) | -13(5) | 25(7)  |
| F(5C)  | 107(10) | 55(6)  | 28(7)  | 15(6) | -9(8)  | -12(7) |
| C(12C) | 19(3)   | 23(2)  | 17(1)  | -3(1) | 0(1)   | 7(2)   |
| C(13C) | 37(2)   | 28(1)  | 17(1)  | 4(1)  | 1(1)   | 12(1)  |
| C(14C) | 57(2)   | 27(2)  | 31(2)  | 6(1)  | 1(2)   | -1(1)  |
| C(15C) | 42(2)   | 35(2)  | 26(2)  | 3(1)  | -2(2)  | 19(2)  |

---

Table S-11. Hydrogen coordinates ( $\times 10^4$ ) and isotropic displacement parameters ( $\text{\AA}^2 \times 10^{-3}$ ) for Ballatore\_BRL\_I\_205.

|        | x     | y    | z    | U(eq) |
|--------|-------|------|------|-------|
| H(1A)  | 4283  | 5252 | 5694 | 28    |
| H(5A)  | -3894 | 7714 | 3770 | 25    |
| H(7A)  | -2786 | 7024 | 1035 | 28    |
| H(12F) | 3228  | 6251 | 2782 | 22    |
| H(12E) | 1868  | 6309 | 2115 | 22    |
| H(13A) | 2807  | 3968 | 2665 | 28    |
| H(14G) | 202   | 3732 | 2840 | 49    |
| H(14I) | 643   | 2838 | 1967 | 49    |
| H(14H) | 103   | 4157 | 1781 | 49    |
| H(12C) | 3030  | 5814 | 2663 | 22    |
| H(12D) | 1819  | 6393 | 2131 | 22    |
| H(13B) | 492   | 4288 | 1737 | 28    |
| H(14D) | 2765  | 3408 | 2779 | 49    |
| H(14E) | 1404  | 2497 | 2303 | 49    |
| H(14F) | 1304  | 3378 | 3269 | 49    |
| H(1C)  | 3192  | 2113 | 4254 | 30    |
| H(5C)  | 11717 | -420 | 3823 | 26    |
| H(7C)  | 11142 | -532 | 937  | 31    |
| H(12A) | 4984  | 504  | 1566 | 23    |
| H(12B) | 6514  | 471  | 1197 | 23    |
| H(13D) | 5323  | 2745 | 1690 | 32    |
| H(14A) | 7405  | 3960 | 1207 | 58    |
| H(14B) | 8117  | 2688 | 1139 | 58    |
| H(14C) | 7690  | 3275 | 2148 | 58    |
| H(12G) | 5148  | 649  | 1457 | 23    |
| H(12H) | 6606  | 169  | 1256 | 23    |
| H(13C) | 7762  | 2254 | 1179 | 32    |
| H(14J) | 6881  | 4164 | 1366 | 58    |
| H(14K) | 6824  | 3509 | 2347 | 58    |
| H(14L) | 5432  | 3437 | 1688 | 58    |
